# Supplementary material for: Clinic-Genomic Association Mining for Colorectal Cancer Using Publicly Available Datasets
Source: Hindawi journal article supplement (doi:10.1155/2014/170289), 2014-01-01
Supplement: f1 [file 170289.f1.pdf]

# **Clinic-genomic Association Mining for Colorectal Cancer using Publicly Available Datasets**

## **Supplement**

**Fang Liu<sup>1</sup>, Yaning Feng<sup>1</sup>, Zhenye Li<sup>2</sup>, Chao Pan<sup>1</sup>, Yuncong Su<sup>1</sup>, Rui Yang<sup>1</sup>, Liying Song<sup>1</sup>, Huilong Duan<sup>1</sup>, Ning Deng<sup>1§</sup>**

1. Department of Biomedical Engineering, Key Laboratory for Biomedical Engineering of Ministry of Education, Zhejiang University, Hangzhou 310027, China
2. General Hospital of Ningxia Medical University, Yinchuan, 750004, China

### **<sup>§</sup>Correspondence:**

Ning Deng  
Department of Biomedical Engineering  
Key Laboratory for Biomedical Engineering of Ministry of Education,  
Zhejiang University, Hangzhou, 310027, China.  
Tel: +86-571-87951972.  
Fax: +86-571-87951960  
Email: zju.dengning@gmail.com

## Supplementary tables

### Table S1

Table S1 is the filter rule used to search GEO for colorectal cancer related GSE.

### Table S2

Table S2 is the colorectal cancer related keywords used to search GAD.

### Table S3

Table S3 is clinical related semantic types used to screen out clinical concepts.

### Table S4

Table S4 is the Matlab code of modified logarithmic scale detection algorithm.

### Table S5

Table S5 is the top 10 pathways with the most number of genes.

### Table S6

Table S6 lists all the colorectal cancer related clinical concepts found by the proposed method. For Column [Association]: "Y" denotes this concept is associated with one or more genes in this study.

### Table S7

Table S7 lists all the colorectal cancer related genes found by the proposed method. For Column [Reliability]: "\*" denotes this gene was related to a concept by a highly reliable association, of which the number of related GSE is more than 1.

### Table S8

Table S8 lists all the clinic-genomic associations mined out by the proposed method. For Column [Reliability]: "\*" denotes this is a highly reliable association, of which the number of related GSE is more than 1.

## Supplementary figures

### Figure S1

Figure S1 is the concept distribution against semantic types. The size of each area reflects the number of concepts covered by the corresponding semantic type.

### Figure S2~S17

Figure S2~S17 are Gephi outputs of clinic-genomic associations classified by semantic types.

### Figure S2

Gephi outputs of the remaining clinic-genomic associations after limiting the semantic type of clinical concepts to be “Anatomical Abnormality”.

### Figure S3

Gephi outputs of the remaining clinic-genomic associations after limiting the semantic type of clinical concepts to be “Biologically Active Substance”.

### Figure S4

Gephi outputs of the remaining clinic-genomic associations after limiting the semantic type of clinical concepts to be “Cell or Molecular Dysfunction”.

### Figure S5

Gephi outputs of the remaining clinic-genomic associations after limiting the semantic type of clinical concepts to be “Clinical Attribute”.

### Figure S6

Gephi outputs of the remaining clinic-genomic associations after limiting the semantic type of clinical concepts to be “Disease or Syndrome”.

### Figure S7

Gephi outputs of the remaining clinic-genomic associations after limiting the semantic type of clinical concepts to be “Finding”.

### Figure S8

Gephi outputs of the remaining clinic-genomic associations after limiting the semantic type of clinical concepts to be “Immunologic Factor”.

### Figure S9

Gephi outputs of the remaining clinic-genomic associations after limiting the semantic type of clinical concepts to be “Injury or Poisoning”.

**Figure S10**

Gephi outputs of the remaining clinic-genomic associations after limiting the semantic type of clinical concepts to be “Laboratory or Test Result”.

**Figure S11**

Gephi outputs of the remaining clinic-genomic associations after limiting the semantic type of clinical concepts to be “Laboratory Procedure”.

**Figure S12**

Gephi outputs of the remaining clinic-genomic associations after limiting the semantic type of clinical concepts to be “Mental or Behavioral Dysfunction”.

**Figure S13**

Gephi outputs of the remaining clinic-genomic associations after limiting the semantic type of clinical concepts to be “Natural Phenomenon or Process”.

**Figure S14**

Gephi outputs of the remaining clinic-genomic associations after limiting the semantic type of clinical concepts to be “Neoplastic Process”.

**Figure S15**

Gephi outputs of the remaining clinic-genomic associations after limiting the semantic type of clinical concepts to be “Pathologic Function”.

**Figure S16**

Gephi outputs of the remaining clinic-genomic associations after limiting the semantic type of clinical concepts to be “Phenomenon or Process”.

**Figure S17**

Gephi outputs of the remaining clinic-genomic associations after limiting the semantic type of clinical concepts to be “Sign or Symptom”.

**Figure S18**

Figure S18 is produced by Gephi, displaying the overall view of clinic-genomic associations mined out by the proposed method.

Figure S1

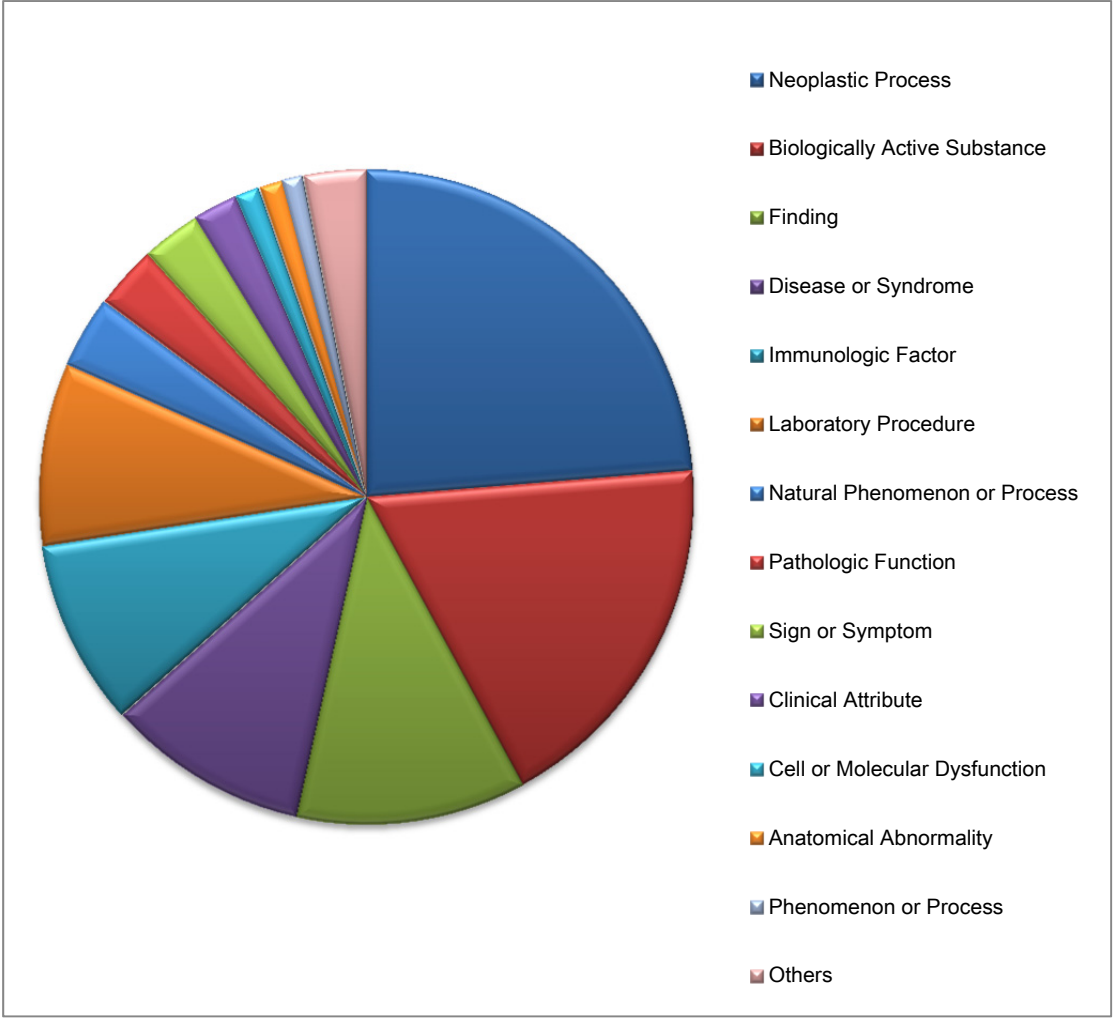

**Figure S2**

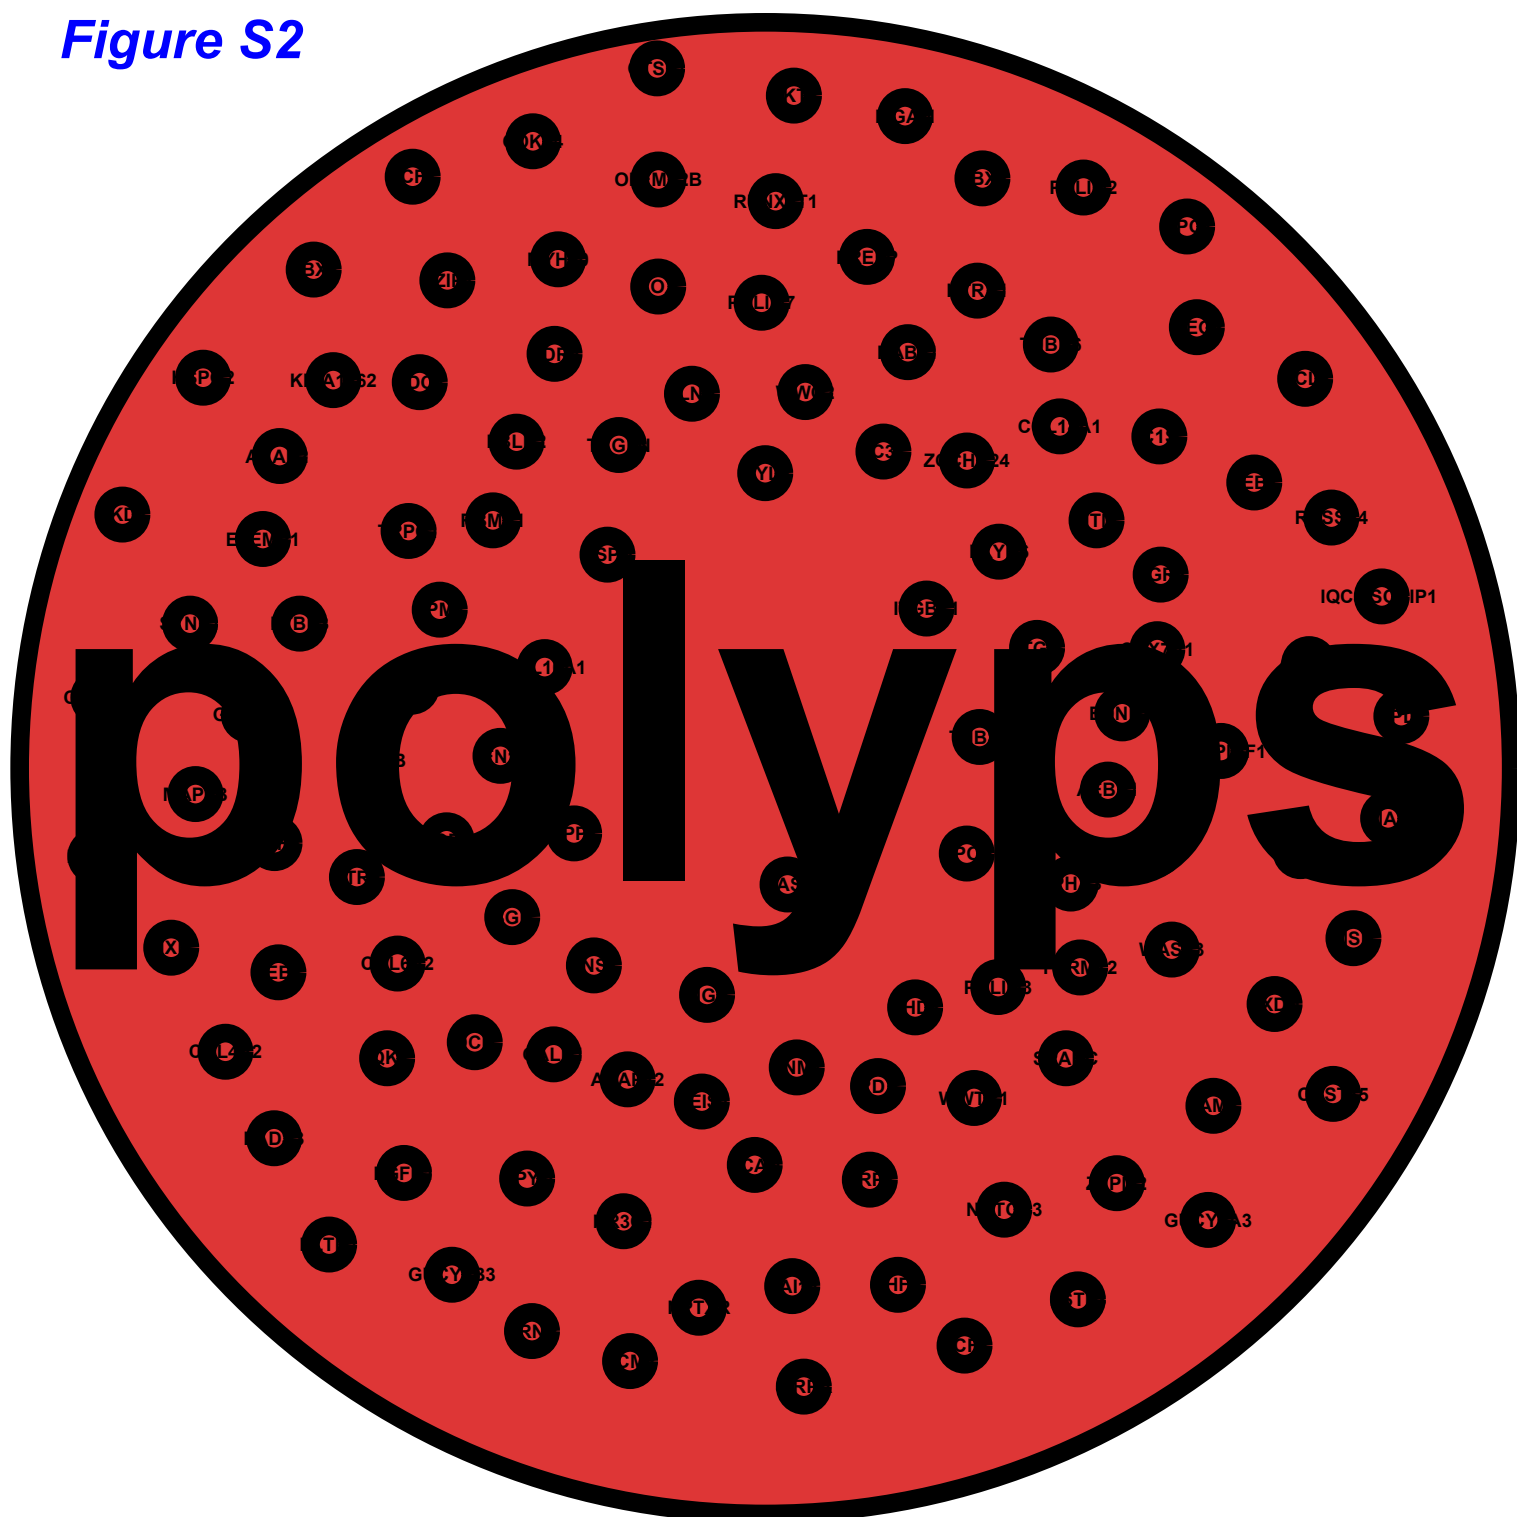

**Figure S3**

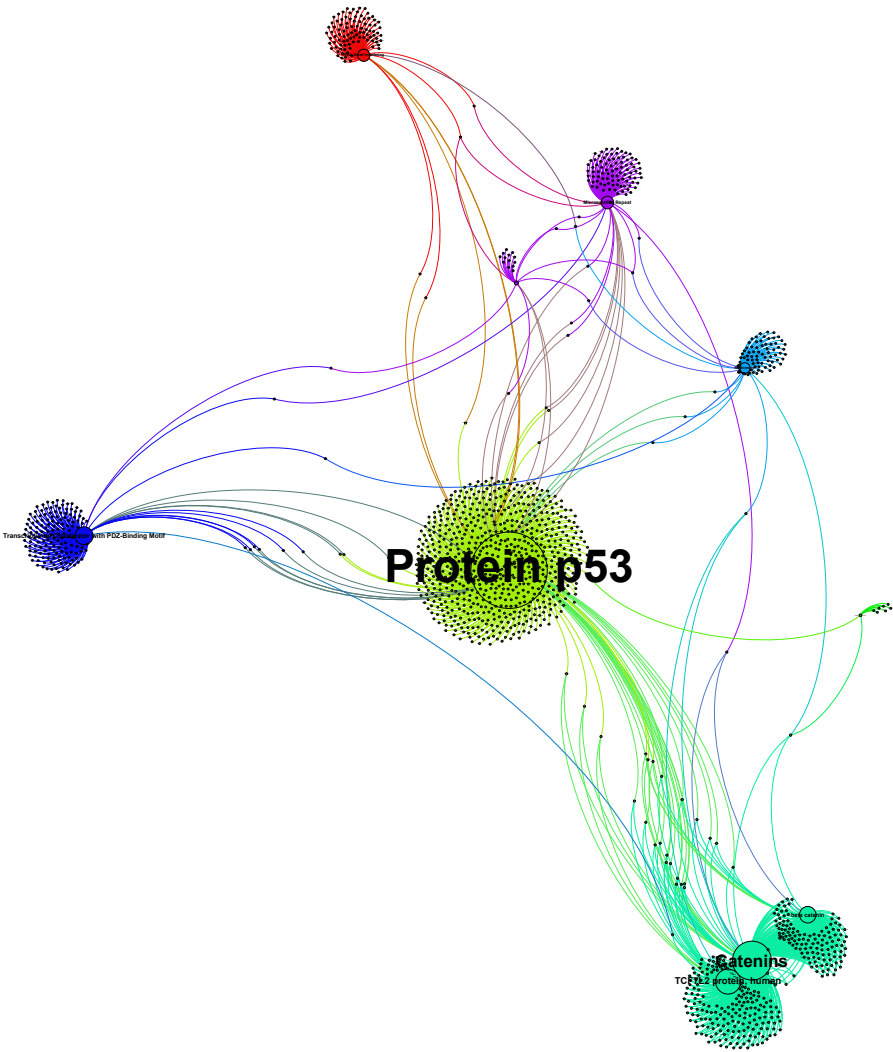

1: Dominant-Negative Mutation

Figure S4

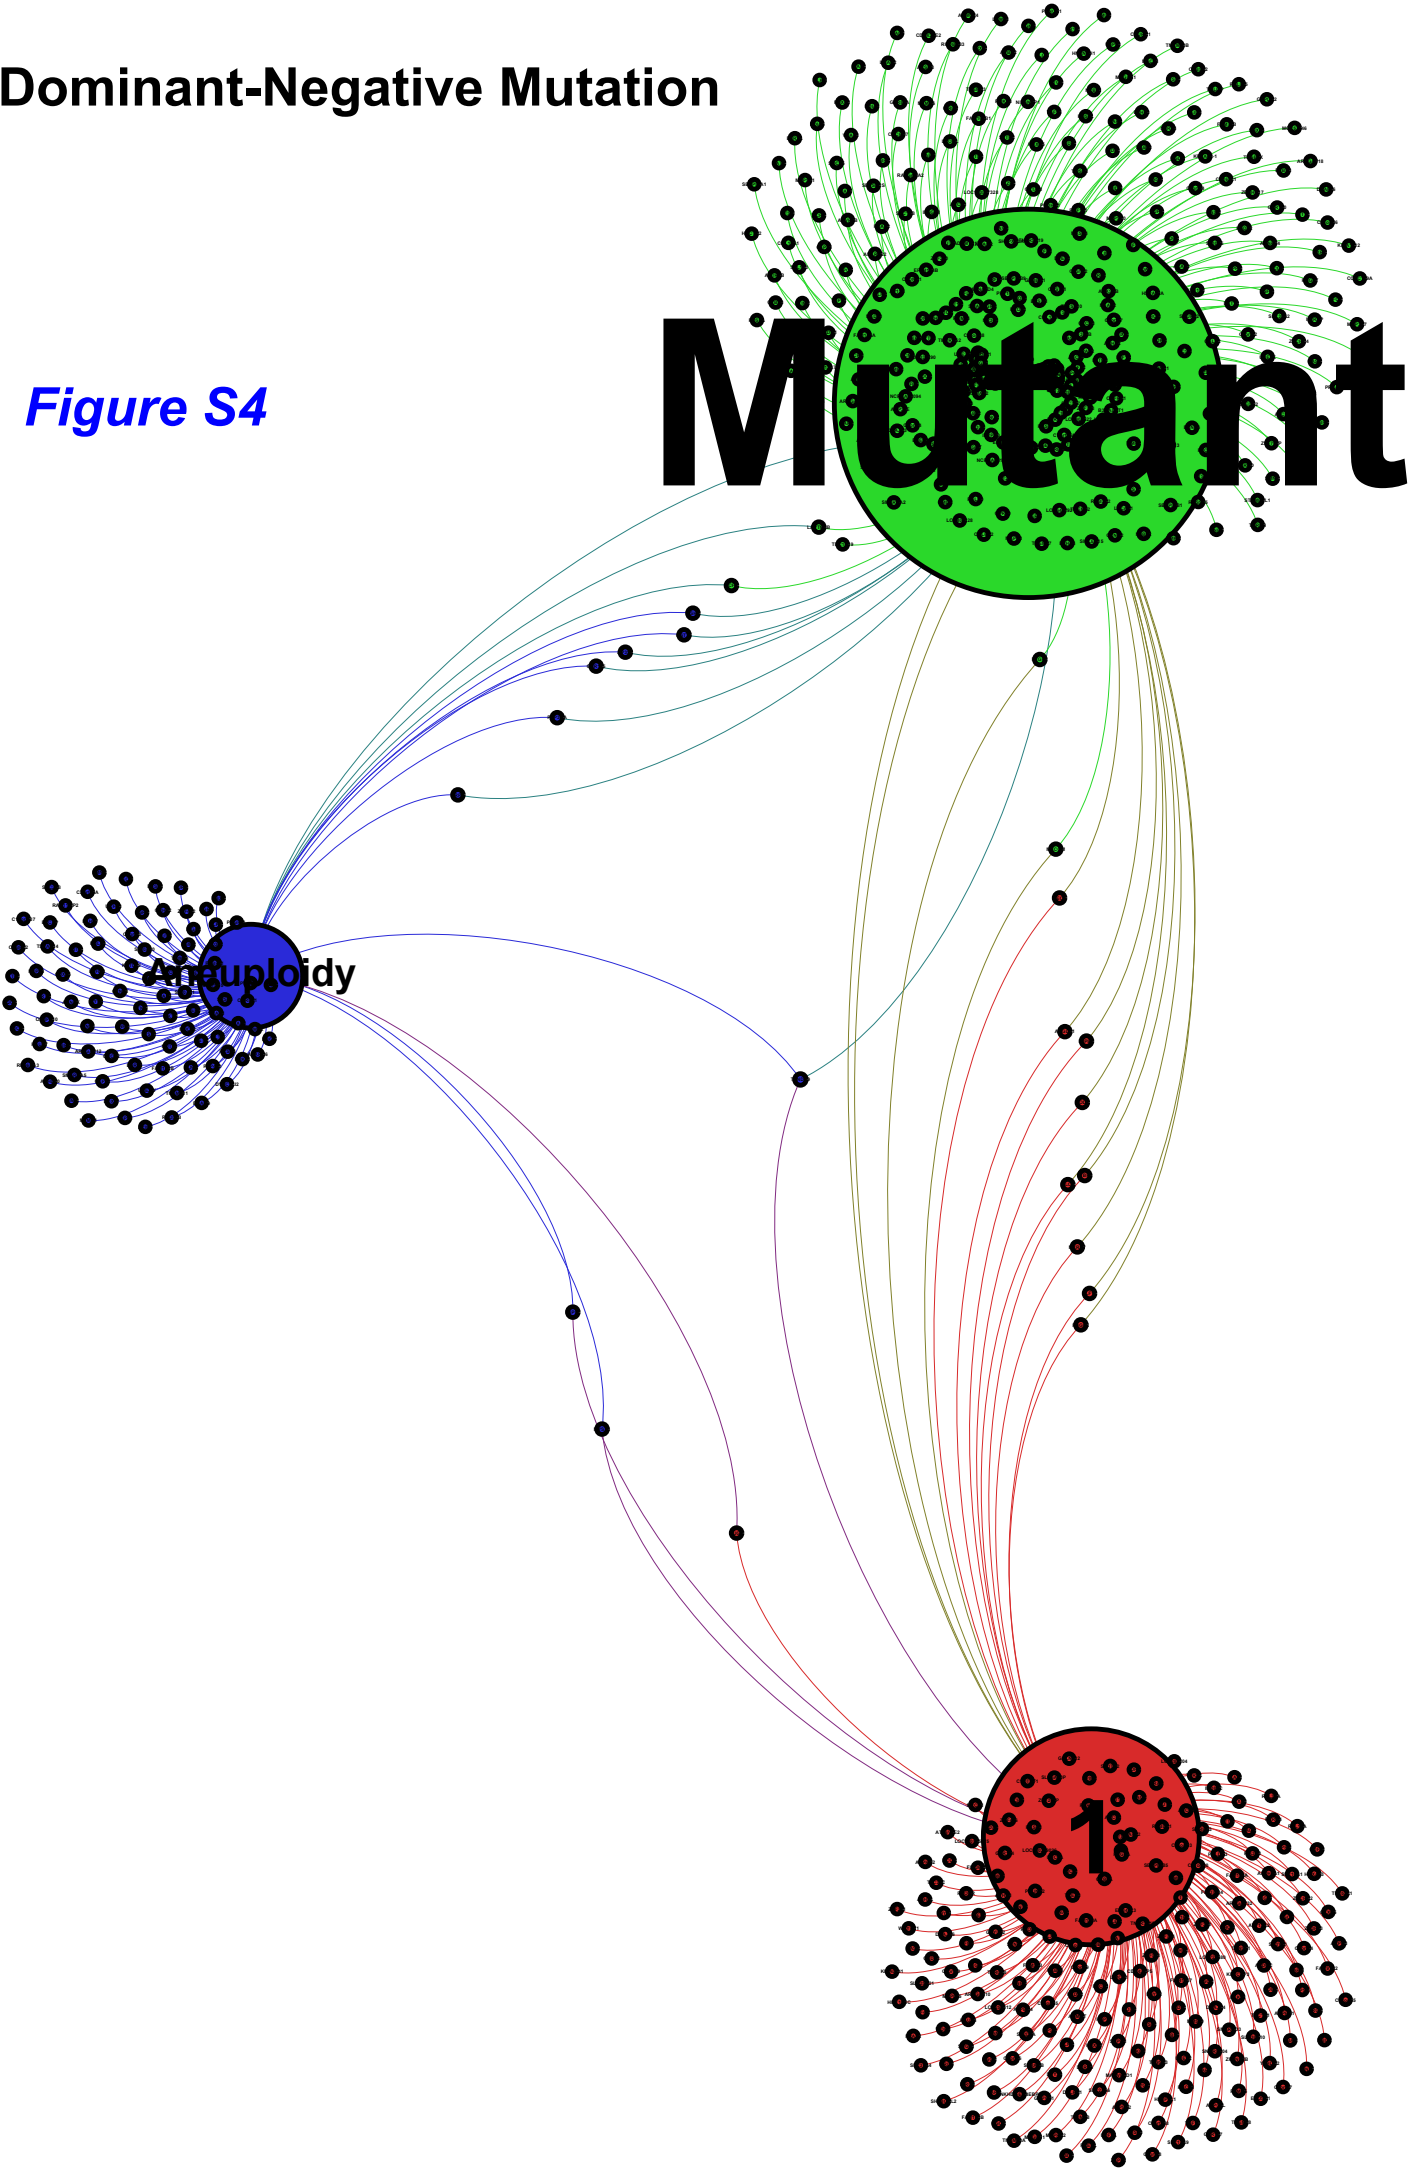



# 1: Histopathologic Grade differentiation

*Figure S5*

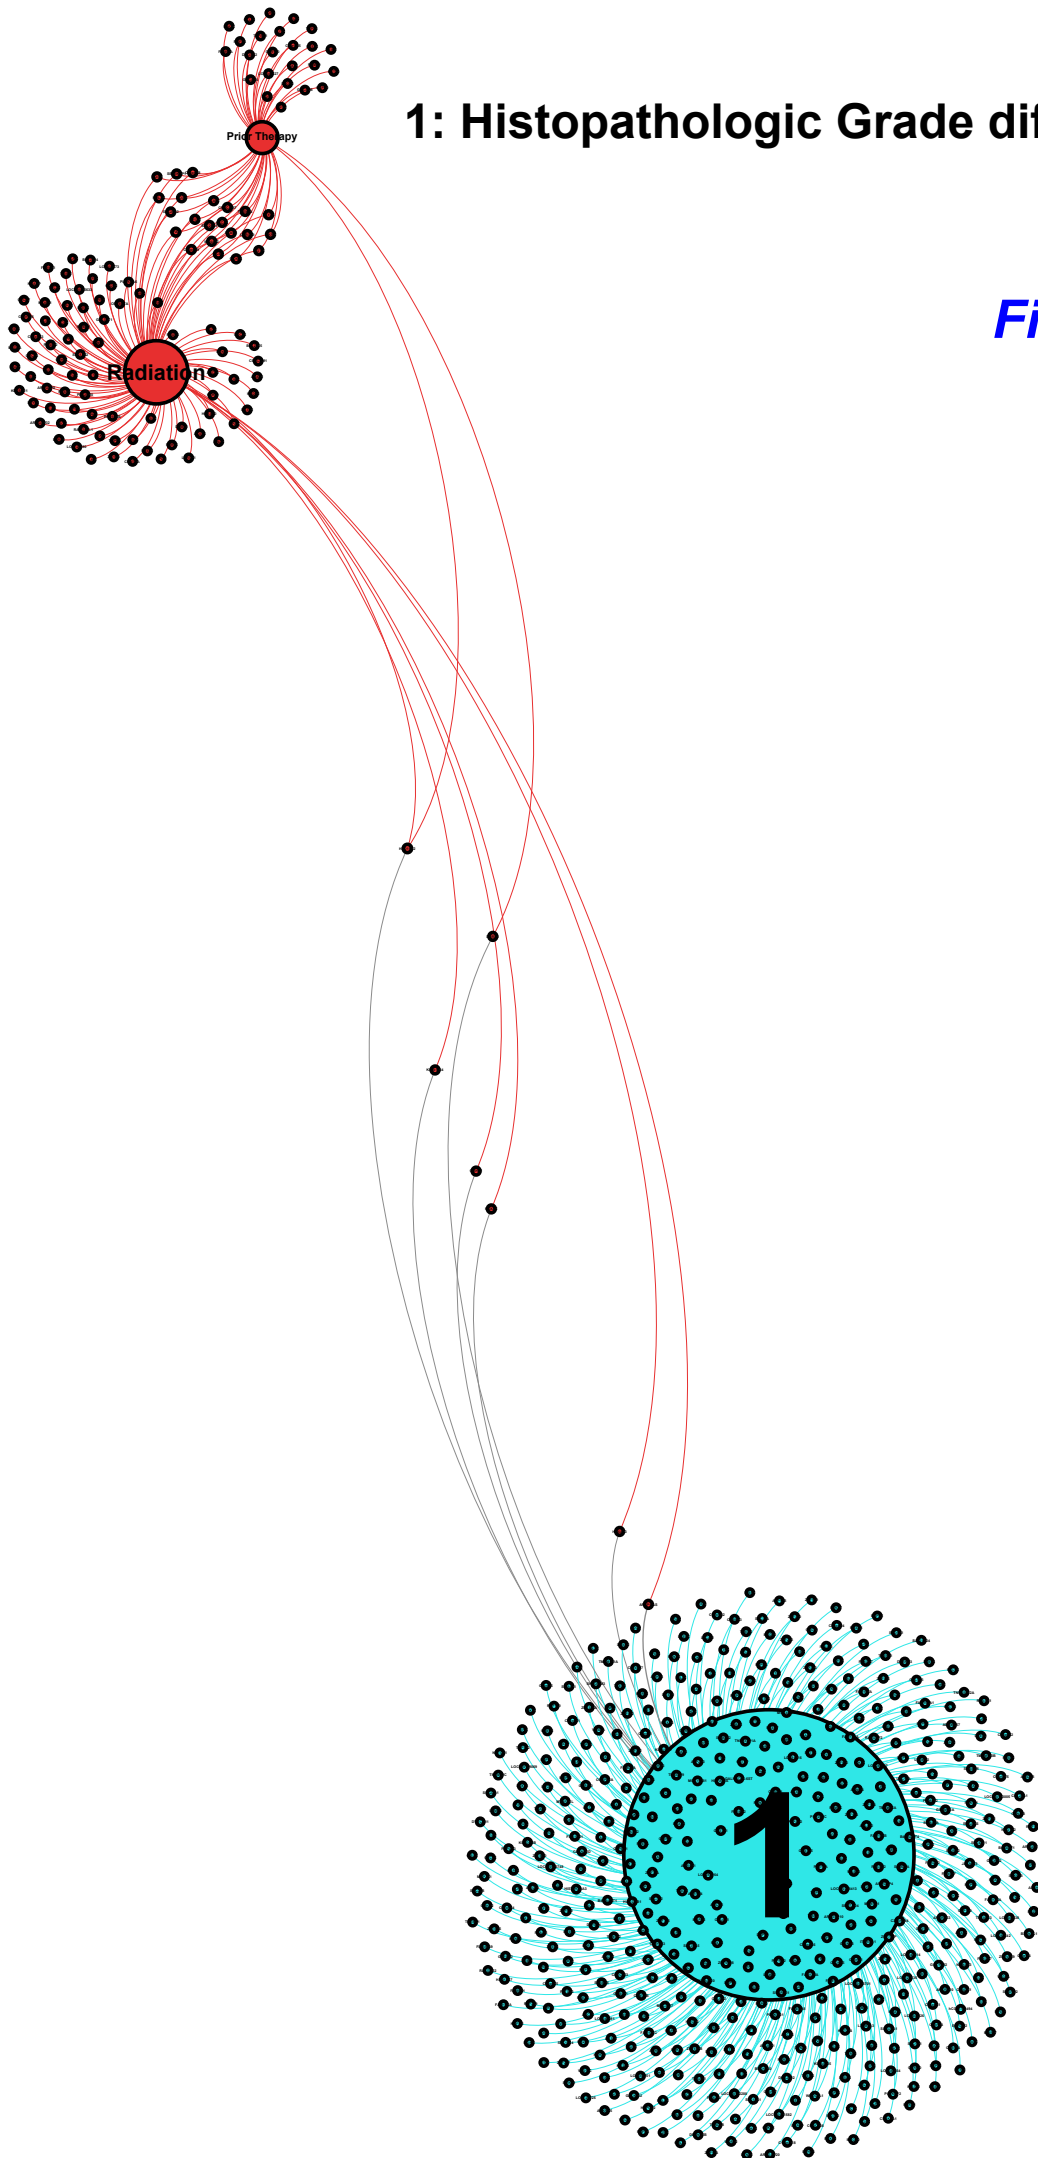

**Figure S6**

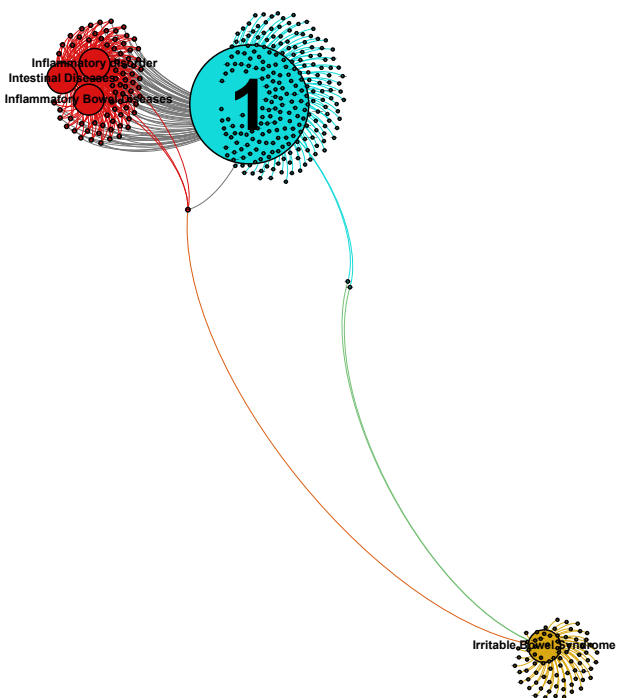

**Figure S7**

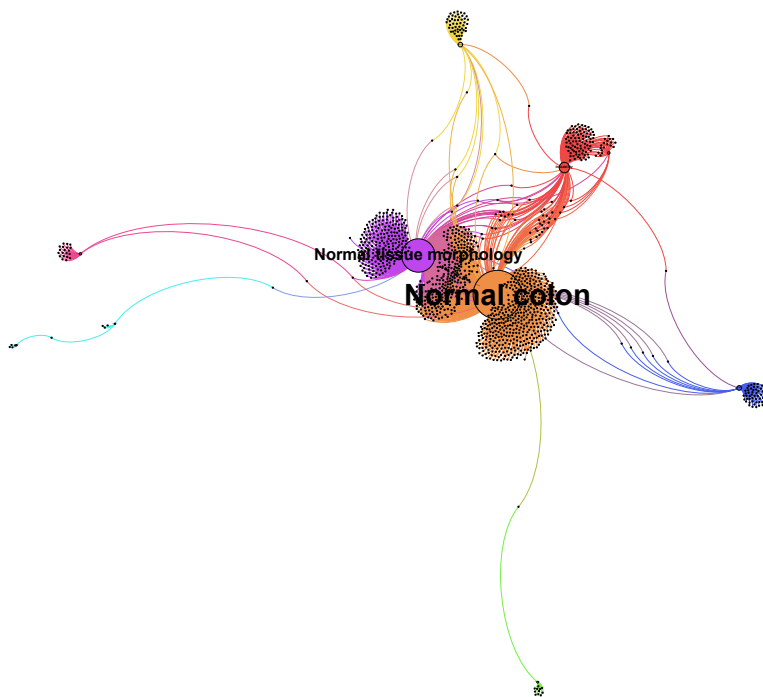

Figure S8

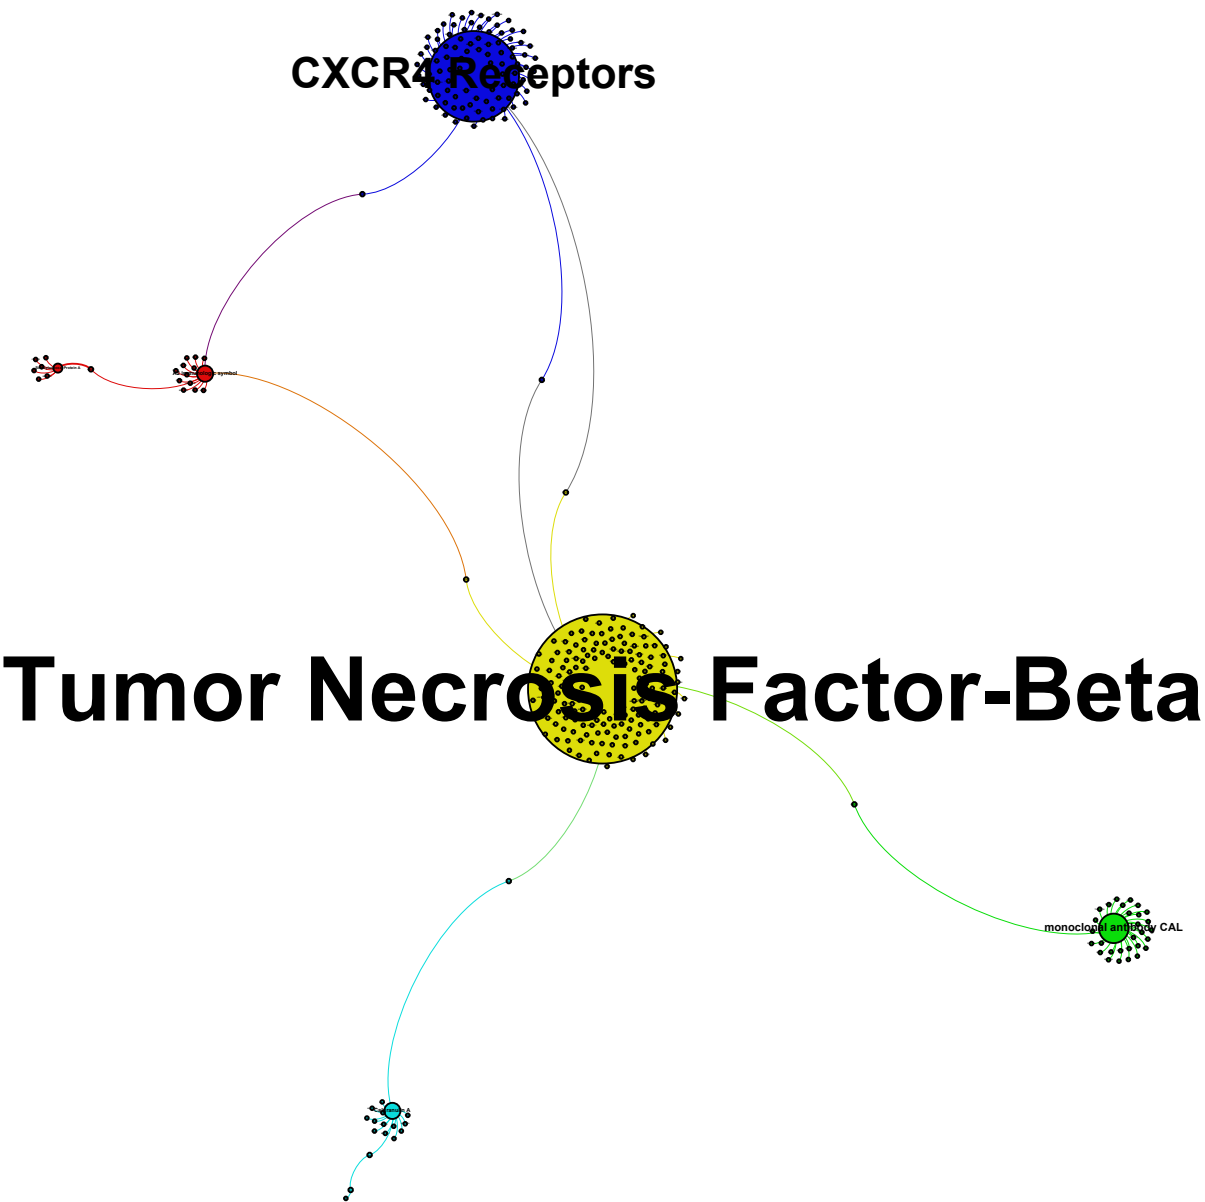

## 1: Incised wound

**Figure S9**

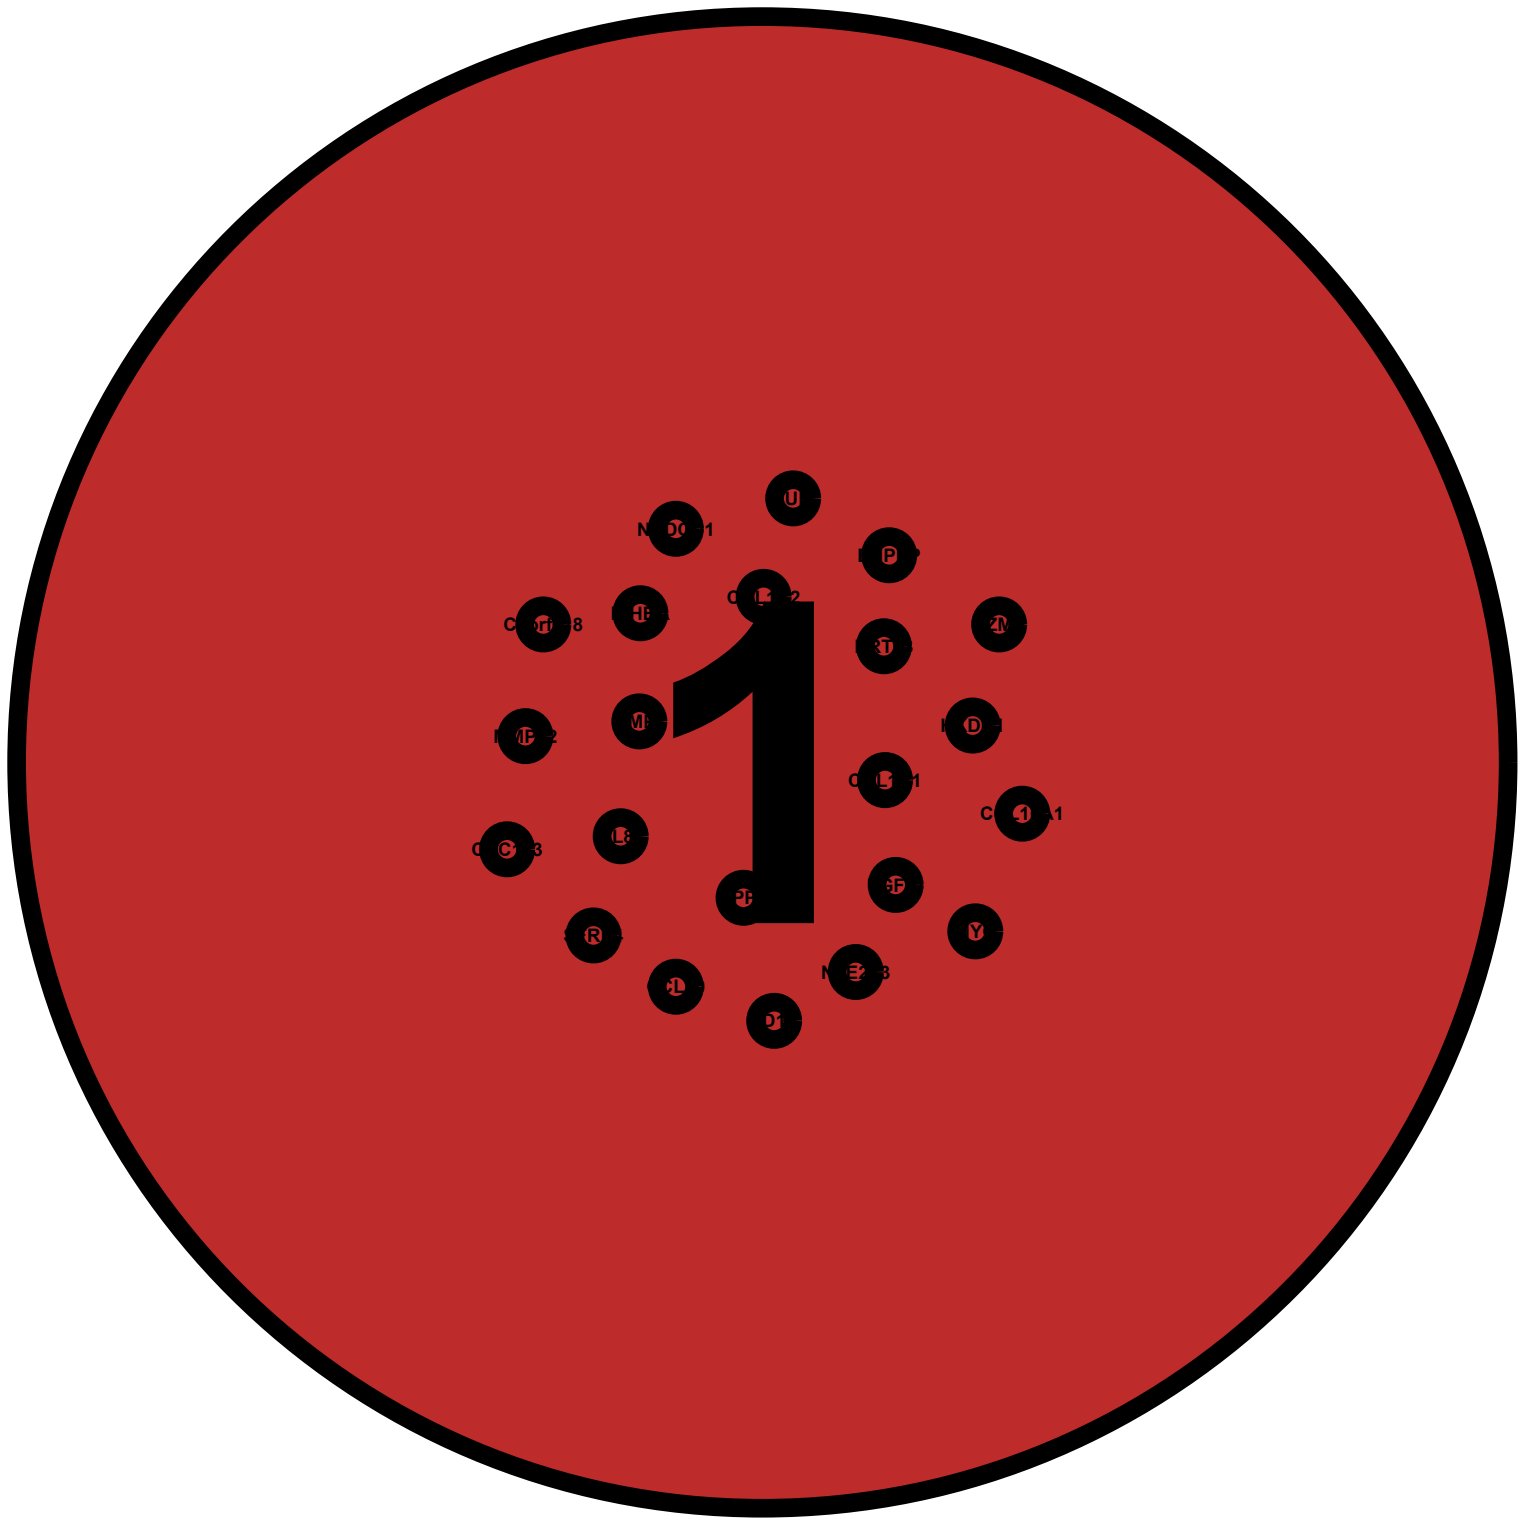

# 1: Human cells

*Figure S10*

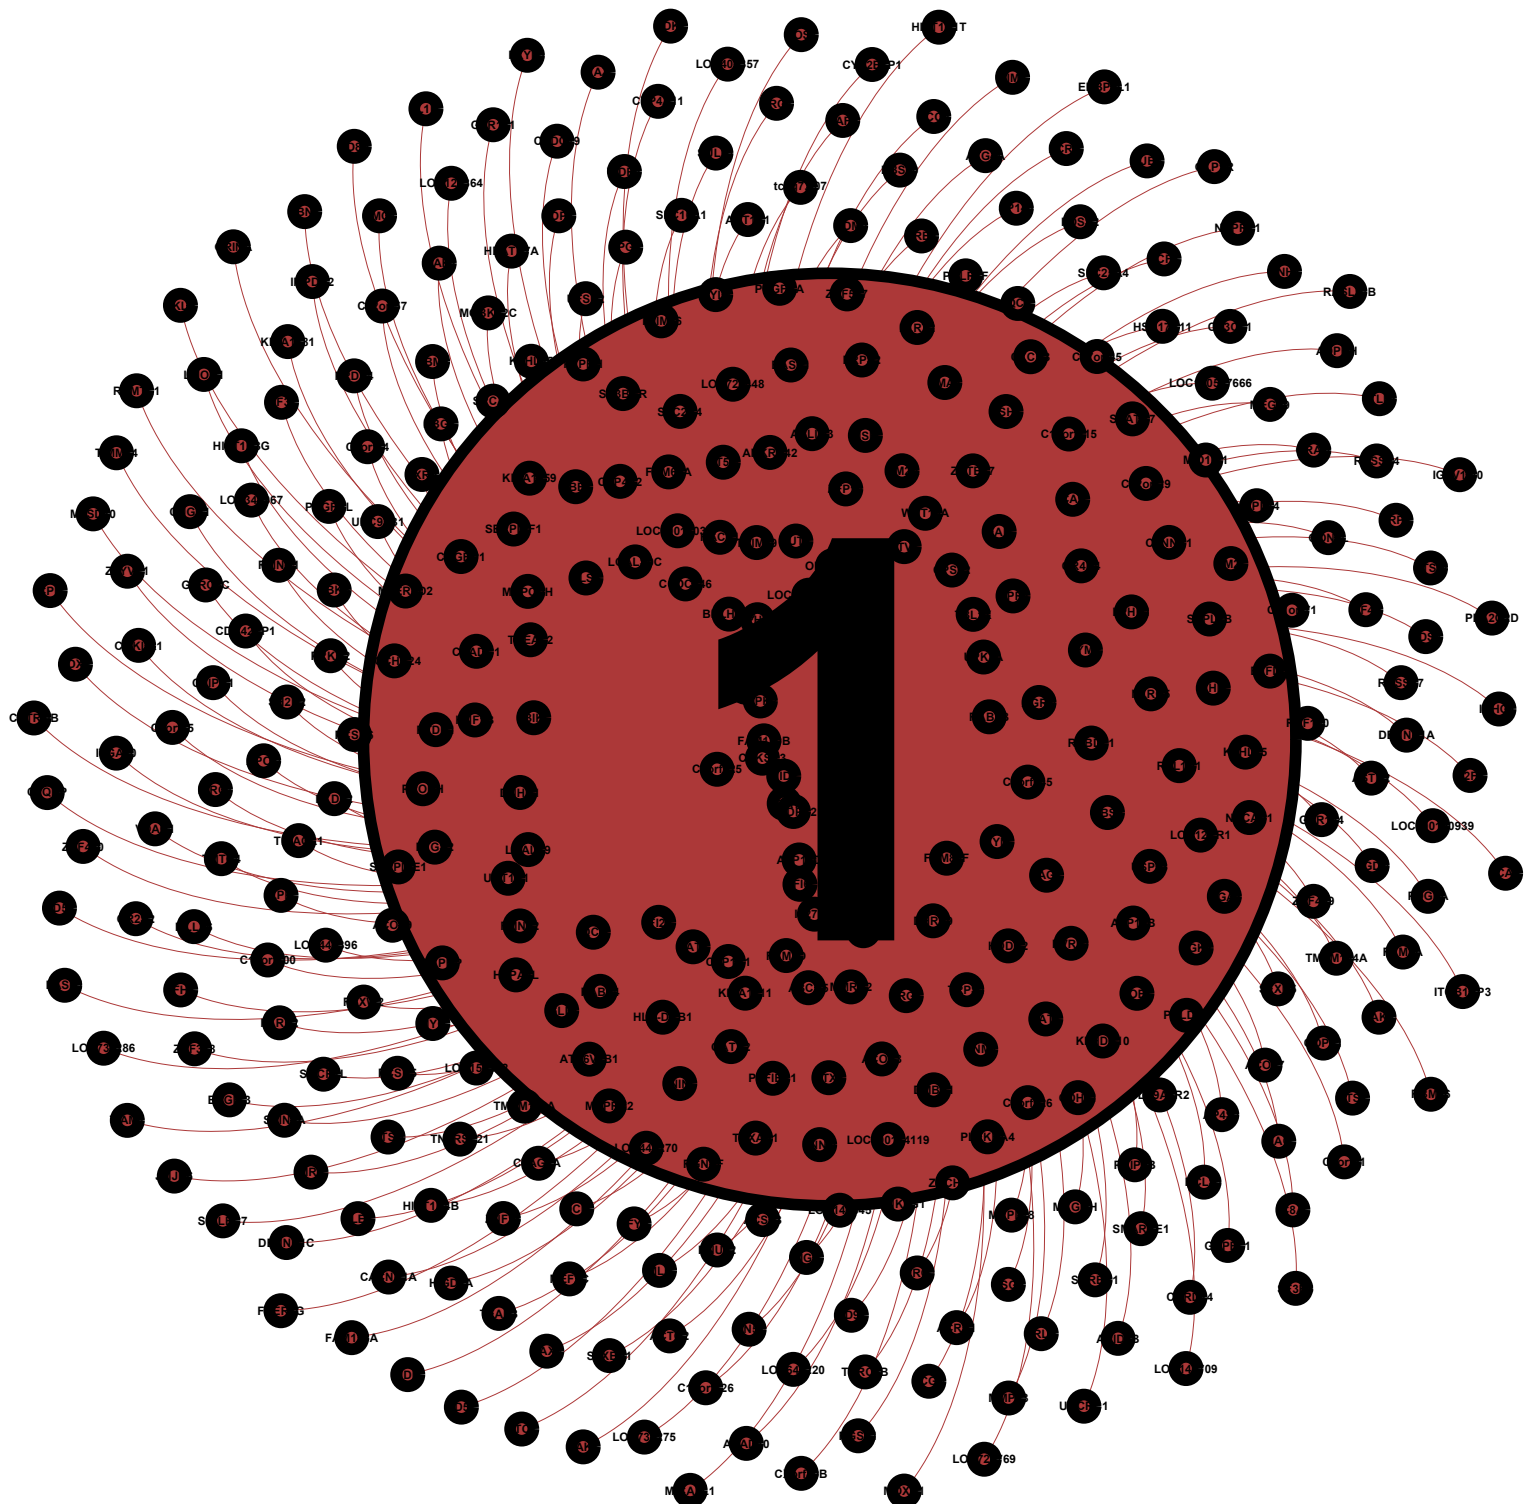

**Figure S11**

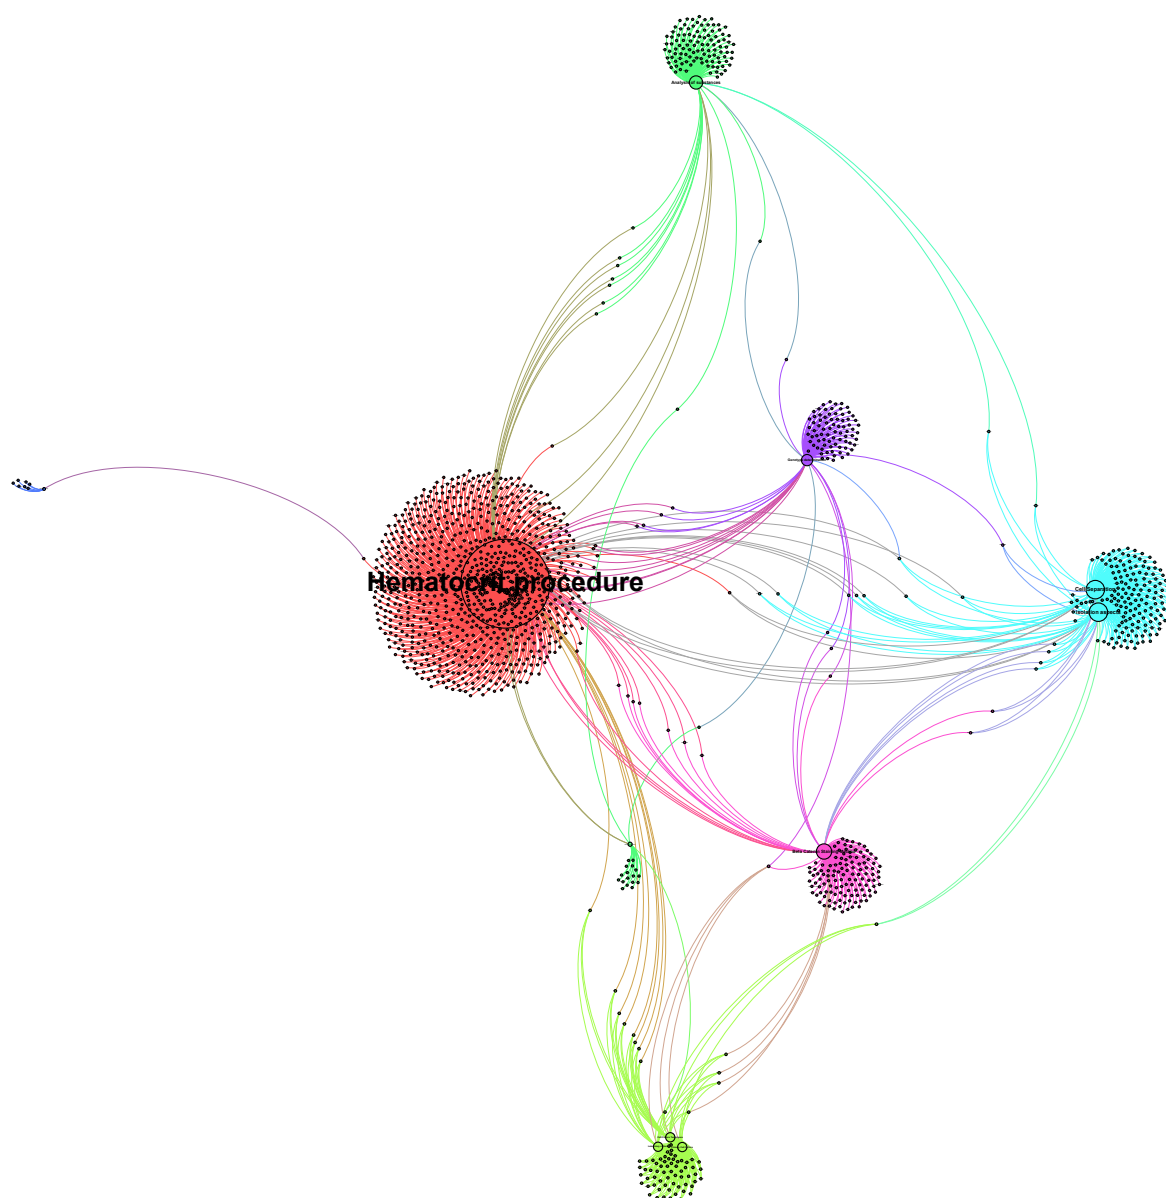

# 1: Schizophrenia

*Figure S12*



1



1: Electromagnetic Energy  
2: Radiation

Figure S13

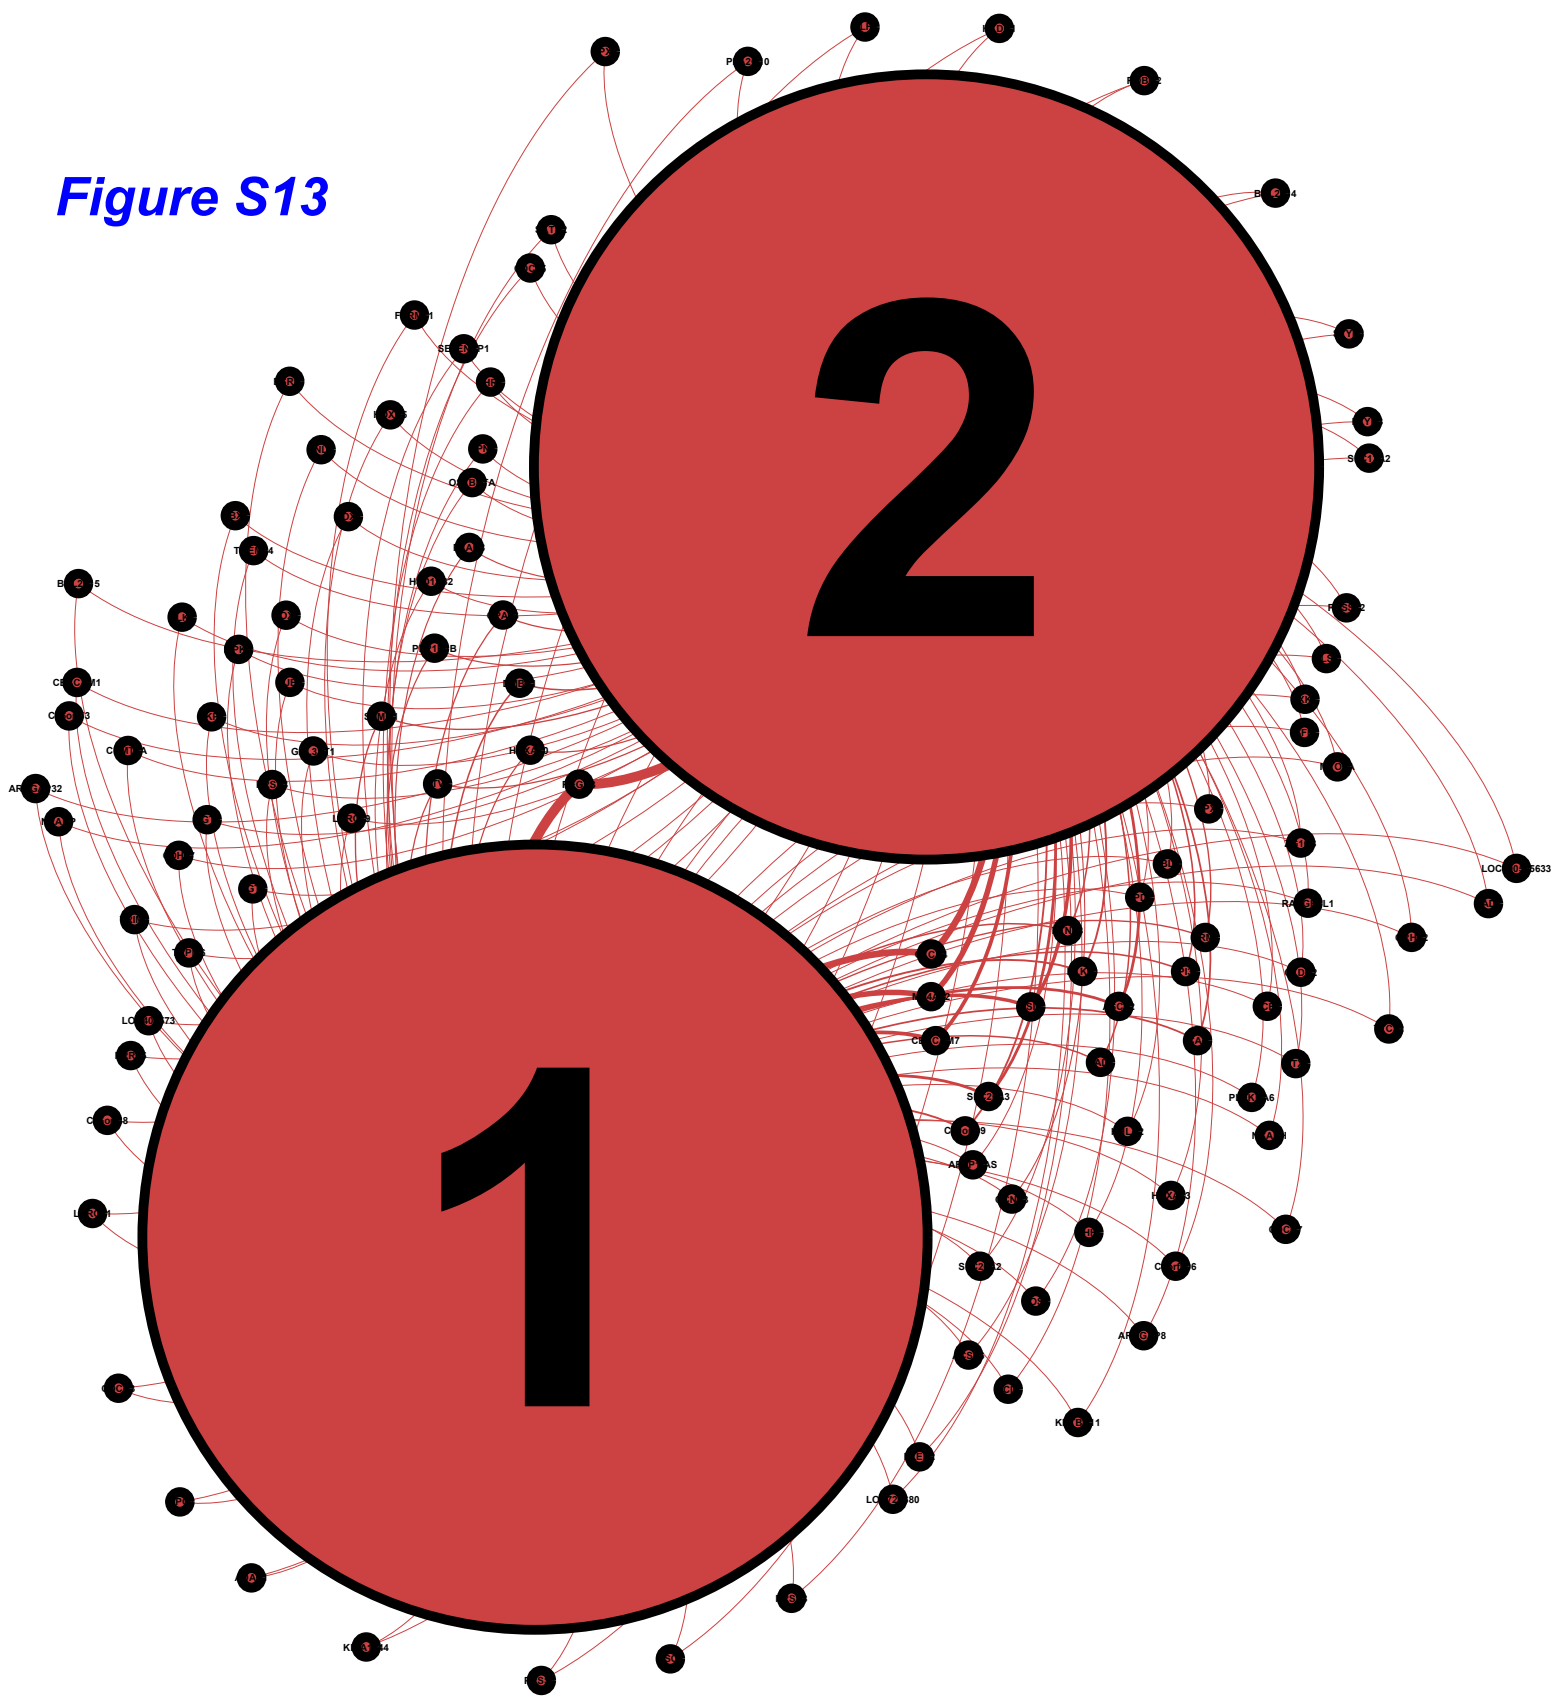

**Figure S14**

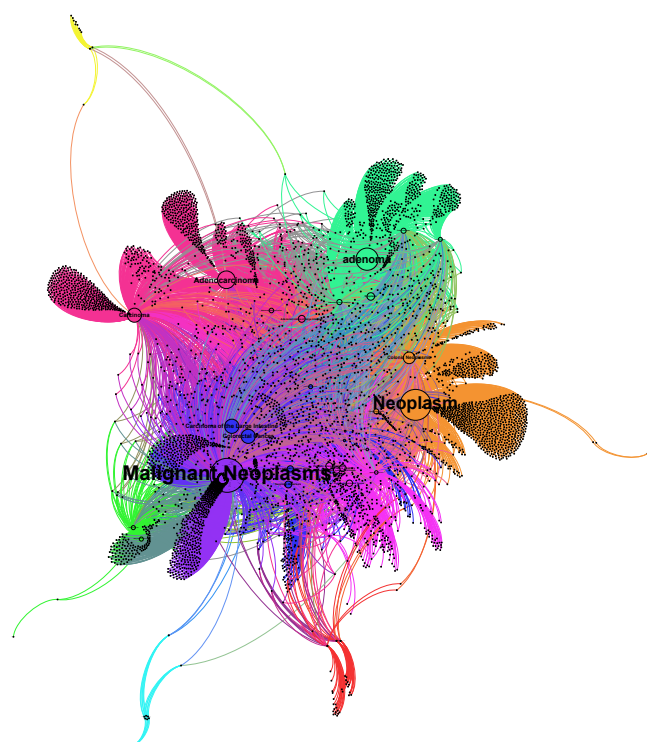

*Figure S15*

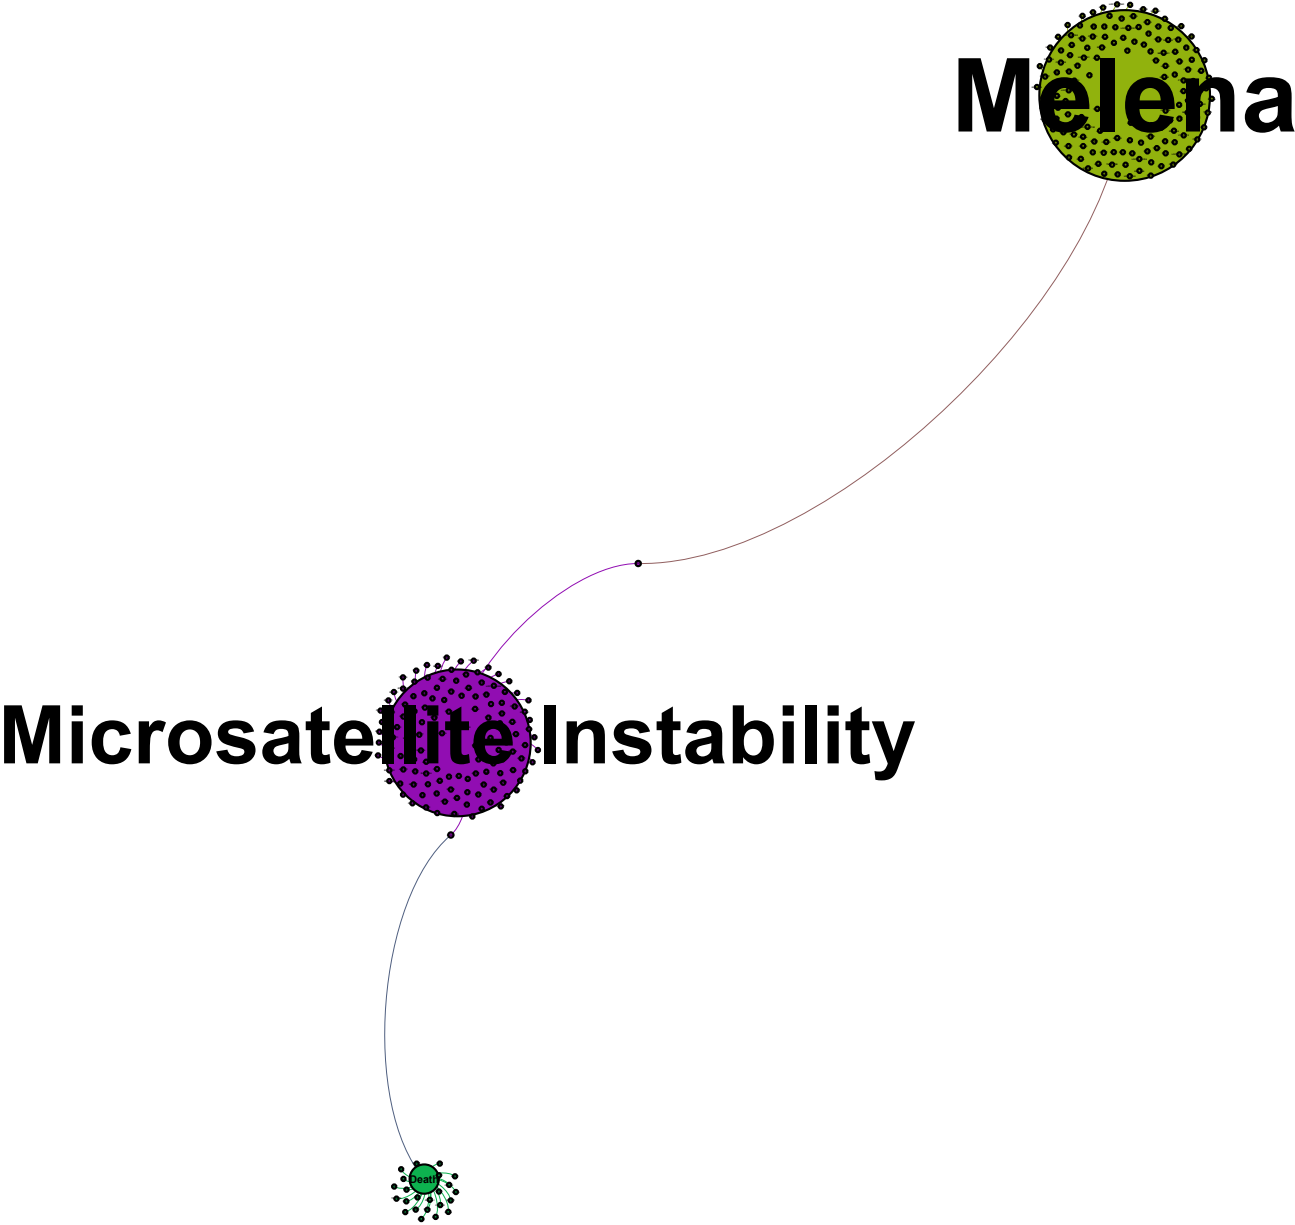

**Figure S16**

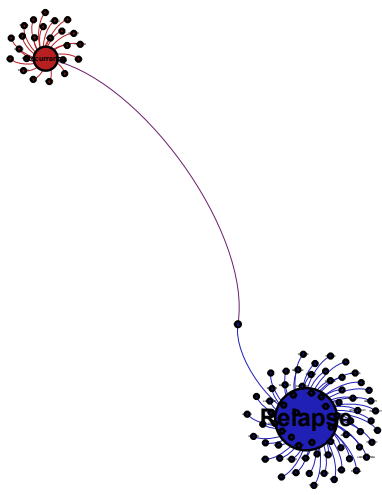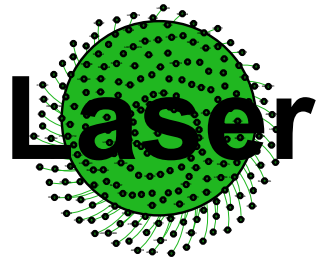

**Figure S17**

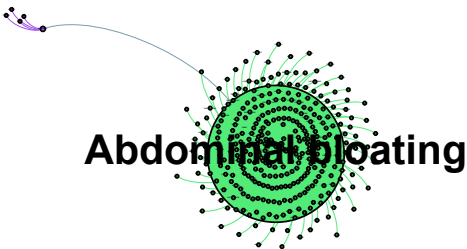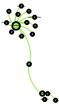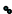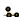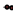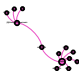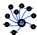

Figure S18

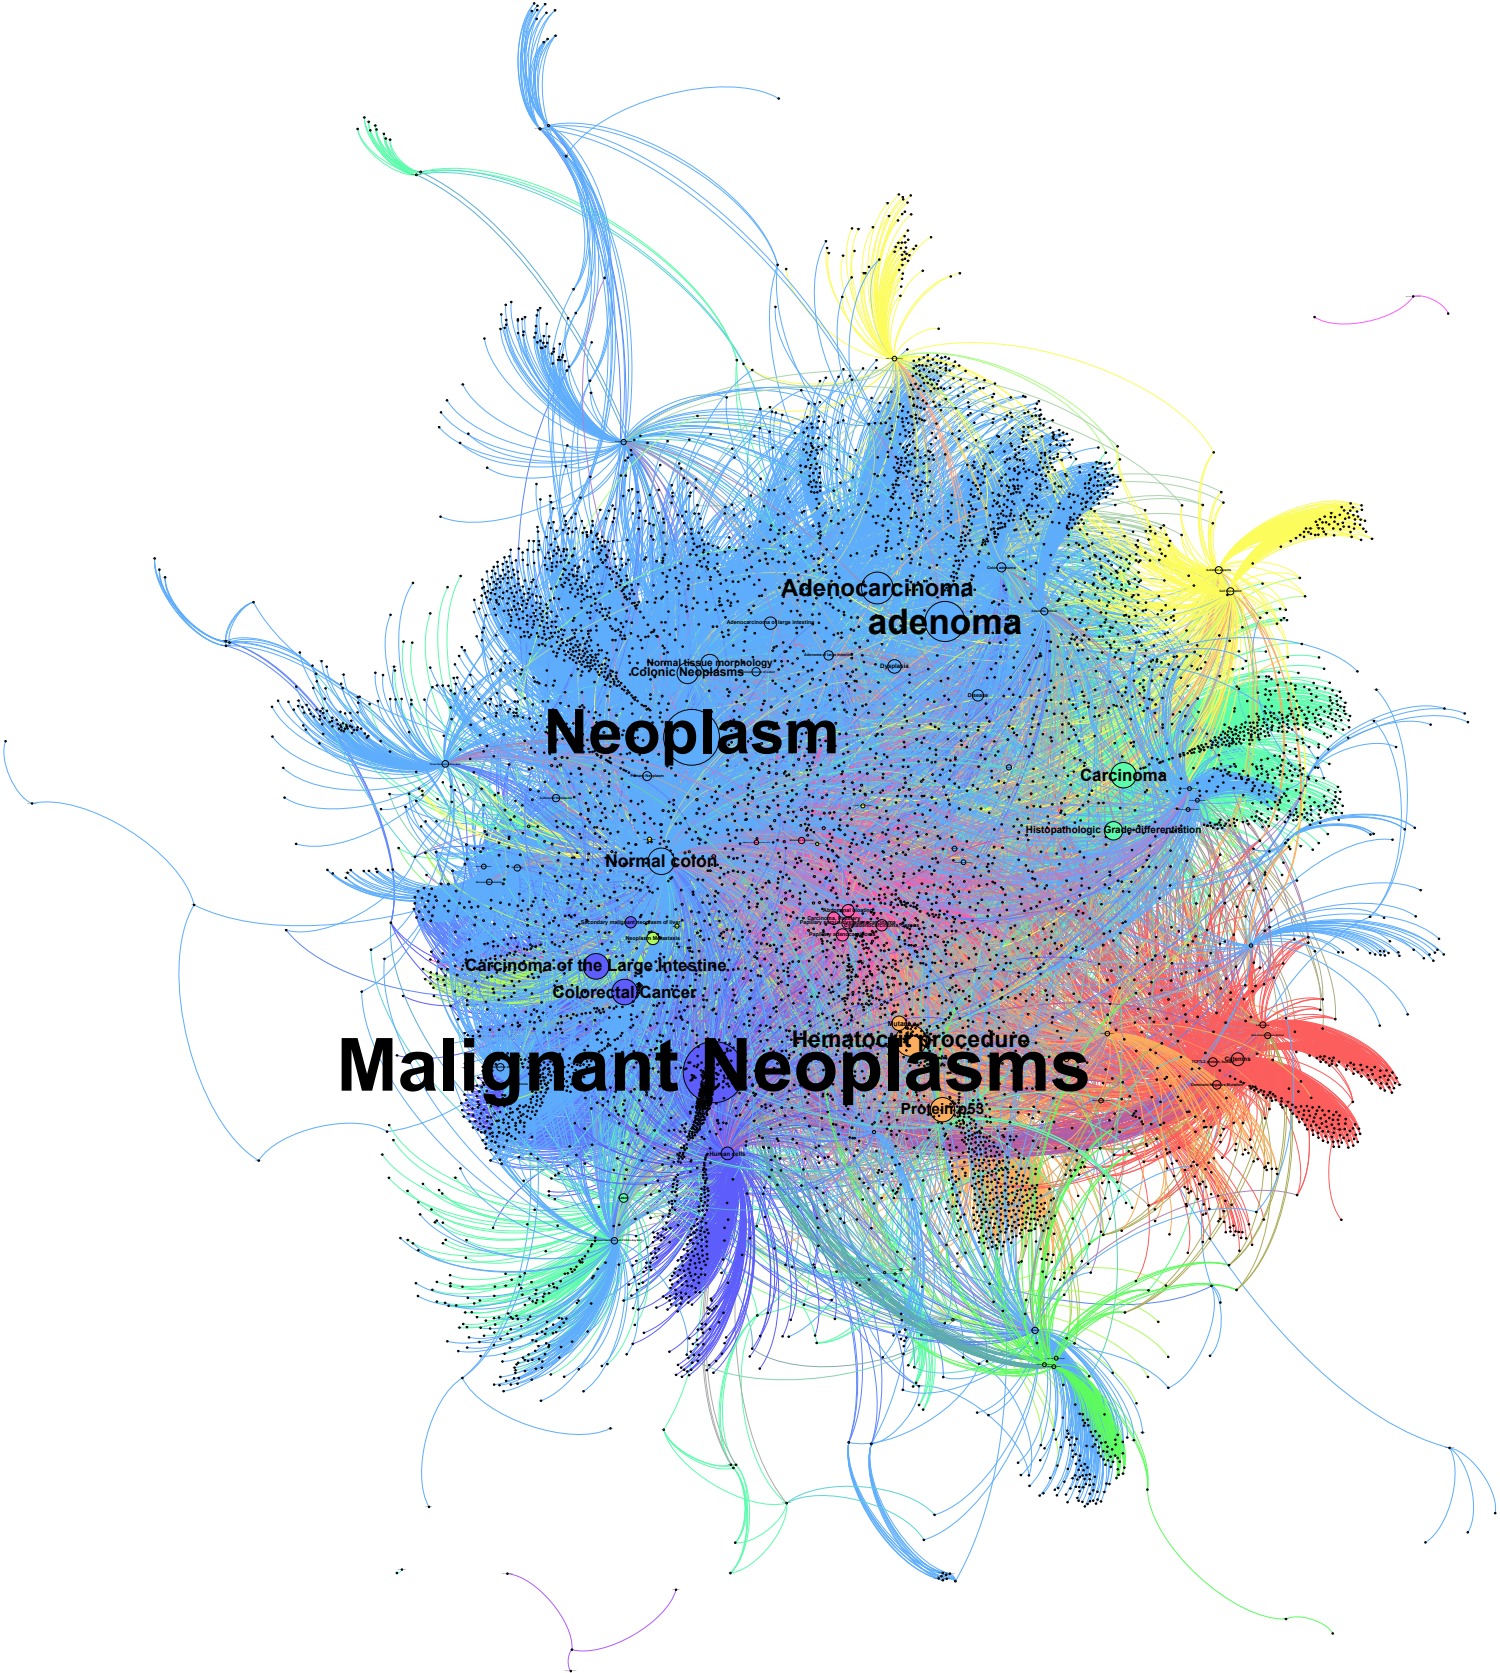

**Table S1 - Filter rule used to search GEO for colorectal cancer related GSE**

| <b>Logical operator</b> | <b>Search Field</b> | <b>Key Words</b>          |
|-------------------------|---------------------|---------------------------|
| ---                     | All Fields          | colon neoplasms           |
| OR                      | All Fields          | rectal neoplasms          |
| OR                      | All Fields          | colorectal neoplasms      |
| OR                      | All Fields          | colon cancer              |
| OR                      | All Fields          | rectal cancer             |
| OR                      | All Fields          | colorectal cancer         |
| OR                      | All Fields          | colon tumor               |
| OR                      | All Fields          | rectal tumor              |
| OR                      | All Fields          | colorectal tumor          |
| OR                      | All Fields          | colon adenoma             |
| OR                      | All Fields          | rectal adenoma            |
| OR                      | All Fields          | colorectal adenoma        |
| OR                      | All Fields          | colon carcinoma           |
| OR                      | All Fields          | rectal carcinoma          |
| OR                      | All Fields          | colorectal carcinoma      |
| OR                      | All Fields          | colon adenocarcinoma      |
| OR                      | All Fields          | rectal adenocarcinoma     |
| OR                      | All Fields          | colorectal adenocarcinoma |
| AND                     | Organism            | Homo sapiens              |

**Table S2 - Colorectal cancer related keywords used to search GAD**

---

|                                             |                             |                             |
|---------------------------------------------|-----------------------------|-----------------------------|
| colon neoplasms;                            | colorectal neoplasms;       | rectal neoplasms;           |
| colon cancer;                               | colorectal cancer;          | rectal cancer;              |
| colon adenoma;                              | colorectal adenoma;         | rectal adenoma;             |
| colon carcinoma;                            | colorectal carcinoma;       | rectal carcinoma;           |
| colon adenocarcinoma;                       | colorectal adenocarcinoma;  | rectal adenocarcinoma;      |
| colon polyps;                               | colorectal polyps;          | rectal polyps;              |
| Crohn's disease;                            | adenomatous polyposis coli; | inflammatory bowel disease; |
| Ulcerative colitis and colitis, ulcerative. |                             |                             |

---

**Table S3 - Clinical related semantic types**

---

|                                   |                               |
|-----------------------------------|-------------------------------|
| Neoplastic Process                | Finding                       |
| Pathologic Function               | Phenomenon or Process         |
| Cell or Molecular Dysfunction     | Congenital Abnormality        |
| Anatomical Abnormality            | Acquired Abnormality          |
| Immunologic Factor                | Biologically Active Substance |
| Disease or Syndrome               | Natural Phenomenon or Process |
| Laboratory or Test Result         | Sign or Symptom               |
| Mental or Behavioural Dysfunction | Injury or Poisoning           |
| Experimental Model of Disease     | Biologic Function             |
| Laboratory Procedure              | Clinical Attribute            |

---



**Table S4 - Logarithmic scale detection algorithm**

---

```
if(mean(abs(sample_value))<16)

    NeedLogC = false;

else

    quantile_value = [0., 0.25, 0.5, 0.75, 0.99, 1.0];

    Qt = quantile(sample_value,quantile_value);

    NeedLogC = (Qt(5) > 100)|| (Qt(6) -Qt(1) > 50 && Qt(2) > 0)||(Qt(2) > 0

    && Qt(2) < 1 && Qt(4) > 1 && Qt(4) < 2);

end
```

---

**Table S5 - Top 10 pathways with the most number of genes**

---

|                                                                              |
|------------------------------------------------------------------------------|
| hsa01100 Metabolic pathways - Homo sapiens (human) (556)                     |
| hsa05200 Pathways in cancer - Homo sapiens (human) (216)                     |
| hsa04151 PI3K-Akt signaling pathway - Homo sapiens (human) (205)             |
| hsa05166 HTLV-I infection - Homo sapiens (human) (176)                       |
| hsa04060 Cytokine-cytokine receptor interaction - Homo sapiens (human) (158) |
| hsa05205 Proteoglycans in cancer - Homo sapiens (human) (143)                |
| hsa04510 Focal adhesion - Homo sapiens (human) (137)                         |
| hsa04010 MAPK signaling pathway - Homo sapiens (human) (133)                 |
| hsa05169 Epstein-Barr virus infection - Homo sapiens (human) (130)           |
| hsa04014 Ras signaling pathway - Homo sapiens (human) (126)                  |

---

Table S6

| Index | CUI      | Concept Name                       | Semantic Type                 | GSM Count | GSE Count | Association |
|-------|----------|------------------------------------|-------------------------------|-----------|-----------|-------------|
| 1     | C0278008 | [D]Change in bowel habit           | Sign or Symptom               | 16        | 2         | Y           |
| 2     | C0334277 | [M]Adenocarcinoma, metastatic, NOS | Neoplastic Process            | 54        | 3         | Y           |
| 3     | C1443036 | A2 immunologic symbol              | Immunologic Factor            | 6         | 3         | Y           |
| 4     | C1291077 | Abdominal bloating                 | Sign or Symptom               | 5         | 1         | Y           |
| 5     | C0000833 | Abscess                            | Pathologic Function           | 5         | 2         | Y           |
| 6     | C0001418 | Adenocarcinoma                     | Neoplastic Process            | 2403      | 86        | Y           |
| 7     | C0338106 | Adenocarcinoma of colon            | Neoplastic Process            | 706       | 24        | Y           |
| 8     | C1319315 | Adenocarcinoma of large intestine  | Neoplastic Process            | 581       | 34        | Y           |
| 9     | C0007130 | Adenocarcinoma, Mucinous           | Neoplastic Process            | 103       | 4         | Y           |
| 10    | C0001430 | adenoma                            | Neoplastic Process            | 516       | 24        | Y           |
| 11    | C1302401 | Adenoma of large intestine         | Neoplastic Process            | 34        | 3         | Y           |
| 12    | C0206674 | Adenoma, Villous                   | Neoplastic Process            | 23        | 2         | Y           |
| 13    | C0002778 | Analysis of substances             | Laboratory Procedure          | 1025      | 27        | Y           |
| 14    | C0002938 | Aneuploidy                         | Cell or Molecular Dysfunction | 99        | 2         | Y           |
| 15    | C0002962 | Angina Pectoris                    | Sign or Symptom               | 5         | 2         | Y           |
| 16    | C0549483 | Bacterial Abscess                  | Finding                       | 5         | 2         | Y           |
| 17    | C0105770 | beta catenin                       | Biologically Active Substance | 6         | 3         | Y           |
| 18    | C1527145 | Beta Catenin Staining Method       | Laboratory Procedure          | 6         | 3         | Y           |
| 19    | C0853879 | Breast cancer invasive NOS         | Neoplastic Process            | 6         | 1         | Y           |
| 20    | C0678222 | Breast Carcinoma                   | Neoplastic Process            | 36        | 6         | Y           |
| 21    | C1272329 | Bright red color                   | Finding                       | 147       | 1         | Y           |
| 22    | C0006675 | Calcium                            | Biologically Active Substance | 5         | 1         | Y           |
| 23    | C0054504 | Calgranulin A                      | Immunologic Factor            | 7         | 1         | Y           |
| 24    | C0346627 | Cancer of Intestines               | Neoplastic Process            | 8         | 2         | Y           |
| 25    | C0007113 | Cancer of Rectum                   | Neoplastic Process            | 570       | 16        | Y           |
| 26    | C0007097 | Carcinoma                          | Neoplastic Process            | 1554      | 94        | Y           |
| 27    | C0009402 | Carcinoma of the Large Intestine   | Neoplastic Process            | 2559      | 131       | Y           |
| 28    | C1134719 | Carcinoma, Ductal, Breast          | Neoplastic Process            | 6         | 1         | Y           |
| 29    | C0007133 | Carcinoma, Papillary               | Neoplastic Process            | 7         | 2         | Y           |
| 30    | C1564904 | Catenins                           | Biologically Active Substance | 14        | 5         | Y           |

|    |          |                                              |                               |      |     |   |
|----|----------|----------------------------------------------|-------------------------------|------|-----|---|
| 31 | C0007585 | Cell Culture Techniques                      | Laboratory Procedure          | 26   | 6   | Y |
| 32 | C0007616 | Cell Separation                              | Laboratory Procedure          | 20   | 1   | Y |
| 33 | C0684295 | Chemical extraction                          | Laboratory Procedure          | 276  | 20  | Y |
| 34 | C0850572 | Colon adenoma                                | Neoplastic Process            | 63   | 3   | Y |
| 35 | C0699790 | Colon Carcinoma                              | Neoplastic Process            | 2497 | 147 | Y |
| 36 | C0009375 | Colonic Neoplasms                            | Neoplastic Process            | 915  | 27  | Y |
| 37 | C1527249 | Colorectal Cancer                            | Neoplastic Process            | 2223 | 92  | Y |
| 38 | C0009404 | Colorectal Neoplasms                         | Neoplastic Process            | 748  | 23  | Y |
| 39 | C0009806 | Constipation                                 | Sign or Symptom               | 65   | 1   | Y |
| 40 | C0250501 | CXCR4 Receptors                              | Immunologic Factor            | 12   | 1   | Y |
| 41 | C0206701 | Cystadenocarcinoma, Serous                   | Neoplastic Process            | 18   | 3   | Y |
| 42 | C1306577 | Death                                        | Finding                       | 570  | 7   | Y |
| 43 | C0011860 | Diabetes Mellitus, Non-Insulin-Dependent     | Disease or Syndrome           | 73   | 2   | Y |
| 44 | C0011991 | Diarrhea                                     | Sign or Symptom               | 97   | 3   | Y |
| 45 | C0012634 | Disease                                      | Disease or Syndrome           | 3557 | 75  | Y |
| 46 | C1512032 | Dominant-Negative Mutation                   | Cell or Molecular Dysfunction | 6    | 1   | Y |
| 47 | C1527349 | Ductal Breast Carcinoma                      | Neoplastic Process            | 19   | 2   | Y |
| 48 | C1176475 | Ductal Carcinoma                             | Neoplastic Process            | 19   | 2   | Y |
| 49 | C0334044 | Dysplasia                                    | Neoplastic Process            | 34   | 2   | Y |
| 50 | C0034519 | Electromagnetic Energy                       | Natural Phenomenon or Process | 76   | 12  | Y |
| 51 | C1363945 | Encounter due to therapy                     | Finding                       | 402  | 5   | Y |
| 52 | C0577015 | Esophagus normal                             | Finding                       | 8    | 1   | Y |
| 53 | C0202010 | Fecal analysis procedure                     | Laboratory Procedure          | 157  | 1   | Y |
| 54 | C0243095 | Finding                                      | Sign or Symptom               | 138  | 7   | Y |
| 55 | C0206682 | Follicular thyroid carcinoma                 | Neoplastic Process            | 6    | 1   | Y |
| 56 | C1285573 | Genotype determination                       | Laboratory Procedure          | 386  | 33  | Y |
| 57 | C0018935 | Hematocrit procedure                         | Laboratory Procedure          | 98   | 30  | Y |
| 58 | C0019080 | Hemorrhage                                   | Finding                       | 9    | 2   | Y |
| 59 | C1333600 | Hereditary Malignant Neoplasm                | Neoplastic Process            | 62   | 4   | Y |
| 60 | C1333990 | Hereditary Non-Polyposis Colon Cancer Type 1 | Neoplastic Process            | 78   | 3   | Y |
| 61 | C0009405 | Hereditary Nonpolyposis Colorectal Neoplasms | Neoplastic Process            | 99   | 4   | Y |
| 62 | C1511938 | Histopathologic Grade differentiation        | Clinical Attribute            | 243  | 11  | Y |

|    |          |                                |                               |      |     |   |
|----|----------|--------------------------------|-------------------------------|------|-----|---|
| 63 | C0379832 | HMGA1b Protein                 | Biologically Active Substance | 6    | 1   | Y |
| 64 | C0969693 | HMGA1c Protein                 | Biologically Active Substance | 6    | 1   | Y |
| 65 | C0427861 | Human cells                    | Laboratory or Test Result     | 700  | 46  | Y |
| 66 | C0000925 | Incised wound                  | Injury or Poisoning           | 39   | 1   | Y |
| 67 | C1299583 | Independently able             | Finding                       | 96   | 5   | Y |
| 68 | C1412014 | Infiltrating duct carcinoma    | Neoplastic Process            | 6    | 1   | Y |
| 69 | C0332448 | Infiltration                   | Pathologic Function           | 47   | 4   | Y |
| 70 | C0021390 | Inflammatory Bowel Diseases    | Disease or Syndrome           | 15   | 1   | Y |
| 71 | C1290884 | Inflammatory disorder          | Disease or Syndrome           | 15   | 1   | Y |
| 72 | C1444783 | Instability                    | Finding                       | 907  | 9   | Y |
| 73 | C0021831 | Intestinal Diseases            | Disease or Syndrome           | 15   | 1   | Y |
| 74 | C0022104 | Irritable Bowel Syndrome       | Disease or Syndrome           | 60   | 3   | Y |
| 75 | C0220862 | isolation aspects              | Laboratory Procedure          | 138  | 7   | Y |
| 76 | C0430400 | Laboratory culture             | Laboratory Procedure          | 79   | 18  | Y |
| 77 | C0458142 | Laser                          | Phenomenon or Process         | 77   | 5   | Y |
| 78 | C0023903 | Liver neoplasms                | Neoplastic Process            | 29   | 1   | Y |
| 79 | C1140680 | Malignant neoplasm of ovary    | Neoplastic Process            | 4    | 1   | Y |
| 80 | C0376358 | Malignant neoplasm of prostate | Neoplastic Process            | 59   | 3   | Y |
| 81 | C0007115 | Malignant neoplasm of thyroid  | Neoplastic Process            | 6    | 1   | Y |
| 82 | C0006826 | Malignant Neoplasms            | Neoplastic Process            | 6147 | 251 | Y |
| 83 | C0007102 | Malignant tumor of colon       | Neoplastic Process            | 2401 | 130 | Y |
| 84 | C0806909 | Maximum                        | Finding                       | 10   | 2   | Y |
| 85 | C0025222 | Melena                         | Pathologic Function           | 17   | 1   | Y |
| 86 | C1384494 | Metastatic Carcinoma           | Neoplastic Process            | 14   | 2   | Y |
| 87 | C0025646 | Methionine                     | Biologically Active Substance | 52   | 4   | Y |
| 88 | C0920269 | Microsatellite Instability     | Pathologic Function           | 547  | 6   | Y |
| 89 | C0282522 | Microsatellite Repeat          | Biologically Active Substance | 895  | 14  | Y |
| 90 | C0581124 | Mild asthma                    | Finding                       | 4    | 1   | Y |
| 91 | C1135160 | monoclonal antibody CAL        | Immunologic Factor            | 58   | 2   | Y |
| 92 | C0260037 | Multiple tumors                | Neoplastic Process            | 269  | 1   | Y |
| 93 | C0596988 | Mutant                         | Cell or Molecular Dysfunction | 318  | 18  | Y |
| 94 | C0151744 | Myocardial Ischemia            | Disease or Syndrome           | 5    | 2   | Y |

|     |          |                                       |                                                     |      |     |   |
|-----|----------|---------------------------------------|-----------------------------------------------------|------|-----|---|
| 95  | C0027497 | Nausea                                | Sign or Symptom                                     | 30   | 1   | Y |
| 96  | C1334927 | Neck Carcinoma                        | Neoplastic Process                                  | 6    | 1   | Y |
| 97  | C0027651 | Neoplasm                              | Neoplastic Process                                  | 6094 | 133 | Y |
| 98  | C0027627 | Neoplasm Metastasis                   | Neoplastic Process                                  | 1231 | 38  | Y |
| 99  | C0940500 | Normal colon                          | Finding                                             | 913  | 47  | Y |
| 100 | C0577035 | Normal rectum                         | Finding                                             | 28   | 1   | Y |
| 101 | C0332441 | Normal tissue morphology              | Finding                                             | 564  | 25  | Y |
| 102 | C0029456 | Osteoporosis                          | Disease or Syndrome                                 | 6    | 1   | Y |
| 103 | C1563292 | Osteoporosis family history           | Finding                                             | 6    | 1   | Y |
| 104 | C0029925 | Ovarian Carcinoma                     | Neoplastic Process                                  | 30   | 3   | Y |
| 105 | C1441040 | P1                                    | Immunologic Factor                                  | 66   | 2   | Y |
| 106 | C1557397 | PAIN                                  | Sign or Symptom                                     | 192  | 6   | Y |
| 107 | C0001420 | Papillary adenocarcinoma              | Neoplastic Process                                  | 23   | 5   | Y |
| 108 | C0334359 | Papillary serous cystadenocarcinoma   | Neoplastic Process                                  | 16   | 2   | Y |
| 109 | C0032584 | polyps                                | Anatomical Abnormality                              | 141  | 5   | Y |
| 110 | C1449562 | Primary Cell Culture                  | Laboratory Procedure                                | 7    | 1   | Y |
| 111 | C0677930 | Primary Neoplasm                      | Neoplastic Process                                  | 514  | 11  | Y |
| 112 | C1514463 | Prior Therapy                         | Clinical Attribute                                  | 61   | 1   | Y |
| 113 | C0600139 | Prostate carcinoma                    | Neoplastic Process                                  | 398  | 7   | Y |
| 114 | C0080055 | Protein p53                           | Biologically Active Substance                       | 824  | 25  | Y |
| 115 | C0851346 | Radiation                             | Clinical Attribute<br>Natural Phenomenon or Process | 82   | 13  | Y |
| 116 | C0034897 | Recurrence                            | Phenomenon or Process                               | 844  | 9   | Y |
| 117 | C0278012 | Red stools                            | Sign or Symptom                                     | 147  | 1   | Y |
| 118 | C0332575 | Redness                               | Finding                                             | 171  | 2   | Y |
| 119 | C0035020 | Relapse                               | Phenomenon or Process                               | 225  | 5   | Y |
| 120 | C0035668 | RNA                                   | Biologically Active Substance                       | 2803 | 70  | Y |
| 121 | C1099354 | RNA, Small Interfering                | Biologically Active Substance                       | 229  | 18  | Y |
| 122 | C0389073 | S100A12 protein, human                | Biologically Active Substance                       | 4    | 1   | Y |
| 123 | C0036341 | Schizophrenia                         | Mental or Behavioral Dysfunction                    | 27   | 1   | Y |
| 124 | C0947630 | Scientific Study                      | Laboratory Procedure                                | 472  | 11  | Y |
| 125 | C0494165 | Secondary malignant neoplasm of liver | Neoplastic Process                                  | 238  | 12  | Y |

|     |          |                                                    |                               |     |   |   |
|-----|----------|----------------------------------------------------|-------------------------------|-----|---|---|
| 126 | C0153676 | Secondary malignant neoplasm of lung               | Neoplastic Process            | 20  | 1 | Y |
| 127 | C0038164 | Staphylococcal Protein A                           | Immunologic Factor            | 7   | 2 | Y |
| 128 | C0038354 | Stomach Diseases                                   | Disease or Syndrome           | 11  | 2 | Y |
| 129 | C0577026 | Stomach normal                                     | Finding                       | 6   | 1 | Y |
| 130 | C0039082 | Syndrome                                           | Disease or Syndrome           | 84  | 4 | Y |
| 131 | C0245557 | TACSTD2 protein, human                             | Immunologic Factor            | 6   | 1 | Y |
| 132 | C1336781 | TCF7L2 protein, human                              | Biologically Active Substance | 10  | 3 | Y |
| 133 | C0456984 | Test Result                                        | Finding                       | 202 | 8 | Y |
| 134 | C0549473 | Thyroid carcinoma                                  | Neoplastic Process            | 6   | 1 | Y |
| 135 | C0558353 | Tongue Carcinoma                                   | Neoplastic Process            | 4   | 1 | Y |
| 136 | C1336798 | Transcriptional Coactivator with PDZ-Binding Motif | Biologically Active Substance | 4   | 2 | Y |
| 137 | C0024320 | Tumor Necrosis Factor-Beta                         | Immunologic Factor            | 11  | 1 | Y |
| 138 | C0042963 | Vomiting                                           | Sign or Symptom               | 22  | 1 | Y |
| 139 | C1306888 | White color finding                                | Finding                       | 82  | 6 | Y |
| 140 | C0049308 | 5-Methylcytosine                                   | Biologically Active Substance | 3   | 1 |   |
| 141 | C1443037 | A3 immunologic symbol                              | Immunologic Factor            | 1   | 2 |   |
| 142 | C0000734 | Abdominal mass                                     | Finding                       | 2   | 1 |   |
| 143 | C0000737 | Abdominal Pain                                     | Sign or Symptom               | 120 | 3 |   |
| 144 | C0332472 | abnormal fragmented structure                      | Anatomical Abnormality        | 18  | 4 |   |
| 145 | C0001175 | Acquired Immunodeficiency Syndrome                 | Disease or Syndrome           | 1   | 1 |   |
| 146 | C0427611 | ACT                                                | Laboratory Procedure          | 99  | 3 |   |
| 147 | C0085669 | Acute leukemia                                     | Neoplastic Process            | 364 | 6 |   |
| 148 | C0023493 | Acute T Cell Leukemia                              | Neoplastic Process            | 339 | 4 |   |
| 149 | C0334276 | Adenocarcinoma in situ                             | Neoplastic Process            | 2   | 1 |   |
| 150 | C0279628 | Adenocarcinoma of esophagus                        | Neoplastic Process            | 2   | 1 |   |
| 151 | C0007112 | Adenocarcinoma of prostate                         | Neoplastic Process            | 6   | 1 |   |
| 152 | C0206681 | Adenocarcinoma, Clear Cell                         | Neoplastic Process            | 2   | 1 |   |
| 153 | C0205645 | Adenocarcinoma, Tubular                            | Neoplastic Process            | 40  | 2 |   |
| 154 | C1302652 | Adenoma of rectum                                  | Neoplastic Process            | 36  | 4 |   |
| 155 | C0032580 | Adenomatous Polyposis Coli                         | Neoplastic Process            | 106 | 3 |   |
| 156 | C0206677 | Adenomatous Polyps                                 | Neoplastic Process            | 2   | 1 |   |
| 157 | C0877373 | Advanced cancer                                    | Neoplastic Process            | 80  | 1 |   |

|     |          |                                                                   |                                                     |     |    |  |
|-----|----------|-------------------------------------------------------------------|-----------------------------------------------------|-----|----|--|
| 158 | C1510827 | Affinity                                                          | Natural Phenomenon or Process                       | 10  | 1  |  |
| 159 | C0429563 | After image                                                       | Sign or Symptom                                     | 16  | 1  |  |
| 160 | C0085631 | Agitation                                                         | Sign or Symptom                                     | 41  | 3  |  |
| 161 | C1318045 | AKAP13 protein, human                                             | Biologically Active Substance                       | 1   | 1  |  |
| 162 | C0001924 | Albumins                                                          | Biologically Active Substance                       | 374 | 2  |  |
| 163 | C1561581 | Allergy Severity - Severe                                         | Finding                                             | 1   | 1  |  |
| 164 | C0439044 | Alone                                                             | Finding                                             | 1   | 1  |  |
| 165 | C0002520 | Amino Acids                                                       | Biologically Active Substance                       | 6   | 1  |  |
| 166 | C1521871 | Amplification                                                     | Phenomenon or Process                               | 234 | 8  |  |
| 167 | C0002736 | Amyotrophic Lateral Sclerosis                                     | Disease or Syndrome                                 | 1   | 1  |  |
| 168 | C0281778 | Anal abscess                                                      | Disease or Syndrome                                 | 3   | 1  |  |
| 169 | C0205929 | Anal Fistula                                                      | Anatomical Abnormality                              | 1   | 1  |  |
| 170 | C0002871 | Anemia                                                            | Disease or Syndrome                                 | 4   | 2  |  |
| 171 | C0003090 | Ankylosis                                                         | Acquired Abnormality<br>Disease or Syndrome         | 1   | 1  |  |
| 172 | C0003241 | Antibodies                                                        | Immunologic Factor                                  | 261 | 36 |  |
| 173 | C0003242 | Antibodies, Anti-Idiotypic                                        | Immunologic Factor                                  | 18  | 2  |  |
| 174 | C0368674 | ANTIBODY ANTIBODY                                                 | Immunologic Factor                                  | 10  | 4  |  |
| 175 | C0598658 | antibody conjugate                                                | Immunologic Factor                                  | 16  | 1  |  |
| 176 | C0003320 | Antigens                                                          | Biologically Active Substance<br>Immunologic Factor | 3   | 1  |  |
| 177 | C0427965 | Antimicrobial susceptibility                                      | Finding                                             | 42  | 5  |  |
| 178 | C0003442 | Antithymoglobulin                                                 | Immunologic Factor                                  | 95  | 2  |  |
| 179 | C0003864 | Arthritis                                                         | Disease or Syndrome                                 | 3   | 1  |  |
| 180 | C0003962 | Ascites                                                           | Finding                                             | 14  | 5  |  |
| 181 | C1510438 | Assay                                                             | Laboratory Procedure                                | 87  | 9  |  |
| 182 | C0004096 | Asthma                                                            | Disease or Syndrome                                 | 17  | 2  |  |
| 183 | C0004178 | Atmosphere, planetary                                             | Natural Phenomenon or Process                       | 4   | 1  |  |
| 184 | C1366832 | ATPase, Aminophospholipid Transporter-Like, Class I, Type 8A, Mem | Biologically Active Substance                       | 7   | 2  |  |
| 185 | C1135130 | Avastin                                                           | Immunologic Factor                                  | 118 | 1  |  |
| 186 | C1332360 | AXIN2 protein                                                     | Biologically Active Substance                       | 40  | 1  |  |
| 187 | C0293686 | Bad protein                                                       | Biologically Active Substance                       | 17  | 1  |  |

|     |          |                              |                               |     |   |  |
|-----|----------|------------------------------|-------------------------------|-----|---|--|
| 188 | C0202333 | Barium measurement           | Laboratory Procedure          | 2   | 1 |  |
| 189 | C0796392 | bevacizumab                  | Immunologic Factor            | 8   | 1 |  |
| 190 | C0242210 | Binding Protein              | Biologically Active Substance | 10  | 3 |  |
| 191 | C0005507 | Biological Assay             | Laboratory Procedure          | 87  | 9 |  |
| 192 | C0005522 | Biological Products          | Biologically Active Substance | 12  | 1 |  |
| 193 | C0018941 | Blood Tests                  | Laboratory Procedure          | 2   | 1 |  |
| 194 | C1259929 | BRAF protein, human          | Biologically Active Substance | 269 | 7 |  |
| 195 | C0294028 | BRCA2 Protein                | Biologically Active Substance | 1   | 1 |  |
| 196 | C0858252 | Breast adenocarcinoma        | Neoplastic Process            | 339 | 4 |  |
| 197 | C0006353 | Buffers                      | Biologically Active Substance | 60  | 7 |  |
| 198 | C0006413 | Burkitt Lymphoma             | Neoplastic Process            | 339 | 4 |  |
| 199 | C0872336 | C10                          | Immunologic Factor            | 9   | 1 |  |
| 200 | C1443182 | CALCULATED                   | Laboratory Procedure          | 65  | 3 |  |
| 201 | C0007012 | Carbon Dioxide               | Biologically Active Substance | 4   | 1 |  |
| 202 | C0007082 | Carcinoembryonic Antigen     | Immunologic Factor            | 158 | 2 |  |
| 203 | C0596263 | Carcinogenesis               | Neoplastic Process            | 4   | 1 |  |
| 204 | C0007095 | Carcinoid Tumor              | Neoplastic Process            | 1   | 1 |  |
| 205 | C0007099 | Carcinoma in Situ            | Neoplastic Process            | 4   | 2 |  |
| 206 | C0699885 | Carcinoma of bladder         | Neoplastic Process            | 339 | 4 |  |
| 207 | C0684249 | Carcinoma of lung            | Neoplastic Process            | 376 | 7 |  |
| 208 | C0220647 | Carcinoma of unknown primary | Neoplastic Process            | 4   | 1 |  |
| 209 | C0206659 | Carcinoma, Embryonal         | Neoplastic Process            | 20  | 1 |  |
| 210 | C0206696 | Carcinoma, Signet Ring Cell  | Neoplastic Process            | 43  | 2 |  |
| 211 | C0007138 | Carcinoma, Transitional Cell | Neoplastic Process            | 339 | 4 |  |
| 212 | C0007140 | Carcinosarcoma               | Neoplastic Process            | 13  | 1 |  |
| 213 | C1110554 | Cardiovascular occlusion     | Pathologic Function           | 2   | 1 |  |
| 214 | C0560175 | Carrier of disorder          | Finding                       | 4   | 2 |  |
| 215 | C0699809 | Carries                      | Finding                       | 61  | 5 |  |
| 216 | C1266100 | CASTLE                       | Neoplastic Process            | 95  | 2 |  |
| 217 | C1308290 | CCL15 protein, human         | Biologically Active Substance | 1   | 1 |  |
| 218 | C0108768 | CD14 Antigen                 | Immunologic Factor            | 4   | 1 |  |
| 219 | C0108748 | CD19 Antigens                | Immunologic Factor            | 1   | 2 |  |



|     |          |                                         |                                                     |     |   |  |
|-----|----------|-----------------------------------------|-----------------------------------------------------|-----|---|--|
| 220 | C0054946 | CD20 Antigens                           | Immunologic Factor                                  | 14  | 3 |  |
| 221 | C0003323 | CD4 Antigens                            | Immunologic Factor                                  | 1   | 1 |  |
| 222 | C0243982 | CD44 Antigens                           | Immunologic Factor                                  | 10  | 2 |  |
| 223 | C0108754 | CD56 Antigens                           | Immunologic Factor                                  | 4   | 1 |  |
| 224 | C1619635 | CD71 antigen                            | Immunologic Factor                                  | 1   | 1 |  |
| 225 | C0104998 | CD80 Antigens                           | Immunologic Factor                                  | 1   | 2 |  |
| 226 | C1505661 | CDX2 Protein, human                     | Biologically Active Substance                       | 20  | 4 |  |
| 227 | C0007570 | Celiac Disease                          | Disease or Syndrome                                 | 1   | 1 |  |
| 228 | C0007597 | Cell hybridization                      | Laboratory Procedure                                | 4   | 1 |  |
| 229 | C0154841 | Central retinal vein occlusion          | Disease or Syndrome                                 | 2   | 1 |  |
| 230 | C0007703 | Centrifugation                          | Laboratory Procedure                                | 4   | 1 |  |
| 231 | C0007745 | Ceramides                               | Biologically Active Substance                       | 1   | 1 |  |
| 232 | C0206708 | Cervical Intraepithelial Neoplasia      | Neoplastic Process                                  | 33  | 1 |  |
| 233 | C0302592 | Cervix carcinoma                        | Neoplastic Process                                  | 12  | 1 |  |
| 234 | C0995188 | cetuximab                               | Immunologic Factor                                  | 116 | 3 |  |
| 235 | C0008013 | Chemotactic Factors                     | Biologically Active Substance<br>Immunologic Factor | 4   | 1 |  |
| 236 | C0008073 | Child Development Disorders             | Mental or Behavioral Dysfunction                    | 1   | 1 |  |
| 237 | C0008550 | Chromatography                          | Laboratory Procedure                                | 10  | 1 |  |
| 238 | C0008551 | Chromatography, Affinity                | Laboratory Procedure                                | 10  | 1 |  |
| 239 | C0008574 | Chromium                                | Biologically Active Substance                       | 43  | 1 |  |
| 240 | C1257806 | Chromosomal Instability                 | Cell or Molecular Dysfunction                       | 33  | 1 |  |
| 241 | C0015674 | Chronic Fatigue Syndrome                | Disease or Syndrome                                 | 2   | 1 |  |
| 242 | C0023434 | Chronic Lymphocytic Leukemia            | Neoplastic Process                                  | 50  | 1 |  |
| 243 | C0024117 | Chronic Obstructive Airway Disease      | Disease or Syndrome                                 | 2   | 2 |  |
| 244 | C0542277 | Cleans drug injection equipment finding | Finding                                             | 21  | 2 |  |
| 245 | C0683325 | clinical aspects                        | Clinical Attribute                                  | 15  | 2 |  |
| 246 | C1522545 | c-Myc Staining Method                   | Laboratory Procedure                                | 26  | 5 |  |
| 247 | C0282547 | Coculture Techniques                    | Laboratory Procedure                                | 10  | 2 |  |
| 248 | C0009221 | Codon Nucleotides                       | Biologically Active Substance                       | 4   | 3 |  |
| 249 | C0009264 | cold temperature                        | Natural Phenomenon or Process                       | 9   | 1 |  |
| 250 | C0009319 | Colitis                                 | Disease or Syndrome                                 | 12  | 3 |  |

|     |          |                                           |                                  |     |   |  |
|-----|----------|-------------------------------------------|----------------------------------|-----|---|--|
| 251 | C0861461 | Colon Cancer Stage IV                     | Neoplastic Process               | 32  | 1 |  |
| 252 | C0009393 | Color                                     | Natural Phenomenon or Process    | 193 | 3 |  |
| 253 | C0948380 | Colorectal cancer metastatic              | Neoplastic Process               | 82  | 2 |  |
| 254 | C0677947 | Colorectal cancer stage I                 | Neoplastic Process               | 1   | 1 |  |
| 255 | C0677948 | Colorectal cancer stage II                | Neoplastic Process               | 1   | 1 |  |
| 256 | C0677949 | Colorectal cancer stage III               | Neoplastic Process               | 4   | 1 |  |
| 257 | C0009450 | Communicable Diseases                     | Disease or Syndrome              | 2   | 1 |  |
| 258 | C1441526 | COMPUTED                                  | Laboratory Procedure             | 60  | 1 |  |
| 259 | C1446561 | Concentration measurement                 | Laboratory Procedure             | 94  | 6 |  |
| 260 | C0301869 | Conjugate                                 | Immunologic Factor               | 16  | 1 |  |
| 261 | C0518609 | CONSIDERATION                             | Finding                          | 16  | 1 |  |
| 262 | C0678568 | cooling                                   | Natural Phenomenon or Process    | 4   | 1 |  |
| 263 | C0282523 | CpG Islands                               | Biologically Active Substance    | 16  | 1 |  |
| 264 | C1451465 | CRK protein, human                        | Biologically Active Substance    | 1   | 1 |  |
| 265 | C0010346 | Crohn's disease                           | Disease or Syndrome              | 113 | 3 |  |
| 266 | C0010734 | Cytidine Triphosphate                     | Biologically Active Substance    | 1   | 1 |  |
| 267 | C0010803 | Cytokeratin                               | Biologically Active Substance    | 2   | 1 |  |
| 268 | C0079189 | cytokine                                  | Immunologic Factor               | 4   | 1 |  |
| 269 | C0299250 | Cytokine Inducible SH2-Containing Protein | Biologically Active Substance    | 99  | 1 |  |
| 270 | C0010843 | Cytosine                                  | Biologically Active Substance    | 3   | 1 |  |
| 271 | C0011061 | Deamination                               | Natural Phenomenon or Process    | 3   | 1 |  |
| 272 | C0043096 | Decreased body weight                     | Finding                          | 17  | 4 |  |
| 273 | C0149871 | Deep Vein Thrombosis                      | Disease or Syndrome              | 2   | 1 |  |
| 274 | C0029408 | Degenerative polyarthritis                | Disease or Syndrome              | 4   | 1 |  |
| 275 | C0289848 | deleted in colorectal carcinoma protein   | Biologically Active Substance    | 1   | 2 |  |
| 276 | C0178587 | density                                   | Natural Phenomenon or Process    | 4   | 1 |  |
| 277 | C0011485 | Deoxycytidine                             | Biologically Active Substance    | 17  | 3 |  |
| 278 | C0344315 | Depressed mood                            | Finding                          | 6   | 2 |  |
| 279 | C0011581 | Depressive disorder                       | Mental or Behavioral Dysfunction | 6   | 2 |  |
| 280 | C0349217 | Depressive episode, unspecified           | Mental or Behavioral Dysfunction | 6   | 2 |  |
| 281 | C1441547 | DERIVED                                   | Laboratory Procedure             | 50  | 7 |  |
| 282 | C0011682 | Desiccation                               | Natural Phenomenon or Process    | 16  | 1 |  |

|     |          |                                    |                                               |      |    |  |
|-----|----------|------------------------------------|-----------------------------------------------|------|----|--|
| 283 | C0442726 | Detected                           | Finding                                       | 17   | 2  |  |
| 284 | C0751115 | Digestive Epilepsy                 | Disease or Syndrome                           | 8    | 3  |  |
| 285 | C0544452 | Disease remission                  | Finding                                       | 137  | 2  |  |
| 286 | C0012655 | Disease susceptibility             | Clinical Attribute                            | 1    | 1  |  |
| 287 | C1510475 | Diverticulosis                     | Anatomical Abnormality<br>Disease or Syndrome | 2    | 1  |  |
| 288 | C0012854 | DNA                                | Biologically Active Substance                 | 1374 | 73 |  |
| 289 | C0200898 | DNA analysis                       | Laboratory Procedure                          | 4    | 1  |  |
| 290 | C0753876 | DNA Mismatch Repair Protein MLH1   | Biologically Active Substance                 | 147  | 3  |  |
| 291 | C1333234 | DNA Mismatch Repair Protein MSH2   | Biologically Active Substance                 | 80   | 2  |  |
| 292 | C1333235 | DNA Mismatch Repair Protein PMS2   | Biologically Active Substance                 | 97   | 2  |  |
| 293 | C1442917 | DNA probe method                   | Laboratory Procedure                          | 138  | 8  |  |
| 294 | C0012929 | DNA, Mitochondrial                 | Biologically Active Substance                 | 9    | 1  |  |
| 295 | C0012940 | DNA-Binding Proteins               | Biologically Active Substance                 | 5    | 2  |  |
| 296 | C0013295 | Duodenal Ulcer                     | Disease or Syndrome                           | 341  | 5  |  |
| 297 | C0151966 | Duodenal ulcer with hemorrhage     | Disease or Syndrome                           | 2    | 1  |  |
| 298 | C0013595 | Eczema                             | Disease or Syndrome                           | 2    | 1  |  |
| 299 | C0152096 | Edward's syndrome NOS              | Disease or Syndrome                           | 80   | 1  |  |
| 300 | C0013687 | effusion                           | Pathologic Function                           | 18   | 2  |  |
| 301 | C0675313 | EHF protein, human                 | Biologically Active Substance                 | 1    | 1  |  |
| 302 | C0013855 | Electrophoresis                    | Laboratory Procedure                          | 76   | 2  |  |
| 303 | C0201699 | Electrophoresis, Capillary         | Laboratory Procedure                          | 60   | 1  |  |
| 304 | C0557351 | Employed                           | Finding                                       | 20   | 1  |  |
| 305 | C1527169 | Encounter due to donor examination | Finding                                       | 32   | 6  |  |
| 306 | C0040335 | Encounter due to tobacco use       | Finding                                       | 446  | 1  |  |
| 307 | C0600075 | Endurance of activity              | Finding                                       | 41   | 4  |  |
| 308 | C1530358 | EP300 protein, human               | Biologically Active Substance                 | 1    | 1  |  |
| 309 | C0014544 | Epilepsy                           | Disease or Syndrome                           | 3    | 1  |  |
| 310 | C0677886 | Epithelial ovarian cancer          | Neoplastic Process                            | 26   | 2  |  |
| 311 | C0276242 | Equine viral rhinopneumonitis      | Disease or Syndrome                           | 4    | 1  |  |
| 312 | C1173436 | Erbix                              | Immunologic Factor                            | 118  | 1  |  |
| 313 | C0152018 | Esophageal carcinoma               | Neoplastic Process                            | 2    | 1  |  |

|     |          |                                 |                               |      |    |  |
|-----|----------|---------------------------------|-------------------------------|------|----|--|
| 314 | C0680174 | ethnic                          | Finding                       | 446  | 1  |  |
| 315 | C0015295 | Exons                           | Biologically Active Substance | 12   | 1  |  |
| 316 | C0332157 | Exposure                        | Clinical Attribute            | 109  | 10 |  |
| 317 | C0728853 | Exposure NOS                    | Phenomenon or Process         | 45   | 4  |  |
| 318 | C1172384 | EZH2 protein, human             | Biologically Active Substance | 4    | 1  |  |
| 319 | C0241889 | FAMILY HISTORY                  | Finding                       | 1002 | 6  |  |
| 320 | C0015967 | Fever                           | Finding                       | 3    | 1  |  |
| 321 | C0016057 | fibrosarcoma                    | Neoplastic Process            | 352  | 5  |  |
| 322 | C0016107 | filtration                      | Laboratory Procedure          | 41   | 3  |  |
| 323 | C1304686 | Finding of pH                   | Laboratory or Test Result     | 152  | 6  |  |
| 324 | C1517205 | Flare                           | Sign or Symptom               | 202  | 1  |  |
| 325 | C0235665 | FLUOR                           | Pathologic Function           | 95   | 2  |  |
| 326 | C0016318 | Fluorescent Antibody Technique  | Laboratory Procedure          | 16   | 1  |  |
| 327 | C1333634 | Forkhead Box Protein O4         | Biologically Active Substance | 20   | 1  |  |
| 328 | C0596588 | FOS Protein                     | Biologically Active Substance | 1    | 1  |  |
| 329 | C1333647 | Functional RNA                  | Biologically Active Substance | 1    | 1  |  |
| 330 | C0017011 | Gamma Rays                      | Natural Phenomenon or Process | 13   | 1  |  |
| 331 | C0008555 | Gas Chromatography              | Laboratory Procedure          | 3    | 1  |  |
| 332 | C0278701 | Gastric Adenocarcinoma          | Neoplastic Process            | 2    | 1  |  |
| 333 | C1559265 | GASTROINTESTINAL                | Pathologic Function           | 8    | 4  |  |
| 334 | C0151544 | Gastrointestinal carcinoma      | Neoplastic Process            | 2    | 1  |  |
| 335 | C0017185 | Gastrointestinal Neoplasms      | Neoplastic Process            | 2    | 1  |  |
| 336 | C0238198 | Gastrointestinal Stromal Tumors | Neoplastic Process            | 2    | 1  |  |
| 337 | C0752248 | Gene Expression Profiling       | Laboratory Procedure          | 24   | 3  |  |
| 338 | C0042333 | Genetic Diversity               | Natural Phenomenon or Process | 39   | 1  |  |
| 339 | C0376343 | Genomic Hybridization           | Natural Phenomenon or Process | 17   | 2  |  |
| 340 | C0017636 | Glioblastoma                    | Neoplastic Process            | 371  | 6  |  |
| 341 | C1333681 | GLTSCR2 protein                 | Biologically Active Substance | 1    | 1  |  |
| 342 | C0017725 | Glucose                         | Biologically Active Substance | 3    | 1  |  |
| 343 | C0017797 | Glutamine                       | Biologically Active Substance | 4    | 1  |  |
| 344 | C0017911 | Glycogen                        | Biologically Active Substance | 4    | 1  |  |
| 345 | C0018021 | Goiter                          | Disease or Syndrome           | 2    | 1  |  |

|     |          |                              |                               |     |   |  |
|-----|----------|------------------------------|-------------------------------|-----|---|--|
| 346 | C0018099 | Gout                         | Disease or Syndrome           | 2   | 1 |  |
| 347 | C0018284 | Growth Factor                | Biologically Active Substance | 1   | 1 |  |
| 348 | C0299348 | G-T mismatch-binding protein | Biologically Active Substance | 81  | 2 |  |
| 349 | C0120446 | Guanidine                    | Biologically Active Substance | 4   | 1 |  |
| 350 | C0677607 | Hashimoto Disease            | Disease or Syndrome           | 3   | 1 |  |
| 351 | C0018621 | Hay fever                    | Disease or Syndrome           | 2   | 1 |  |
| 352 | C0018799 | Heart Diseases               | Disease or Syndrome           | 2   | 1 |  |
| 353 | C0018837 | Heat                         | Natural Phenomenon or Process | 77  | 8 |  |
| 354 | C0200627 | Hematology procedure         | Laboratory Procedure          | 12  | 1 |  |
| 355 | C0019046 | Hemoglobin                   | Biologically Active Substance | 374 | 2 |  |
| 356 | C0019134 | Heparin                      | Biologically Active Substance | 4   | 2 |  |
| 357 | C0019158 | Hepatitis                    | Disease or Syndrome           | 3   | 1 |  |
| 358 | C0019189 | Hepatitis, Chronic           | Disease or Syndrome           | 3   | 1 |  |
| 359 | C0520463 | Hepatitis, Chronic Active    | Disease or Syndrome           | 3   | 1 |  |
| 360 | C0206624 | Hepatoblastoma               | Neoplastic Process            | 33  | 2 |  |
| 361 | C0948775 | High weight                  | Sign or Symptom               | 3   | 1 |  |
| 362 | C0019602 | Histidine                    | Biologically Active Substance | 2   | 2 |  |
| 363 | C0449574 | Histologic type              | Clinical Attribute            | 2   | 2 |  |
| 364 | C0344441 | Histology Procedure          | Laboratory Procedure          | 643 | 5 |  |
| 365 | C1291847 | Histone antigen              | Immunologic Factor            | 6   | 2 |  |
| 366 | C0019647 | Histone H3                   | Biologically Active Substance | 6   | 2 |  |
| 367 | C0019652 | Histones                     | Biologically Active Substance | 6   | 2 |  |
| 368 | C0677043 | Histopathology               | Pathologic Function           | 2   | 2 |  |
| 369 | C0019693 | HIV Infections               | Disease or Syndrome           | 1   | 1 |  |
| 370 | C0086413 | HIV Vaccine                  | Immunologic Factor            | 1   | 1 |  |
| 371 | C0019721 | HLA Antigens                 | Immunologic Factor            | 22  | 1 |  |
| 372 | C0242617 | Homeodomain Proteins         | Biologically Active Substance | 4   | 1 |  |
| 373 | C1505203 | HP protein, human            | Biologically Active Substance | 4   | 3 |  |
| 374 | C0020443 | hypercholesterolemia         | Disease or Syndrome           | 2   | 2 |  |
| 375 | C1522133 | Hypercholesterolemia result  | Laboratory or Test Result     | 1   | 1 |  |
| 376 | C0020507 | Hyperplasia                  | Pathologic Function           | 11  | 1 |  |
| 377 | C0242184 | Hypoxia                      | Pathologic Function           | 6   | 2 |  |

|     |          |                                   |                                             |     |    |  |
|-----|----------|-----------------------------------|---------------------------------------------|-----|----|--|
| 378 | C0215474 | IL2-inducible T-cell kinase       | Immunologic Factor                          | 1   | 1  |  |
| 379 | C0021044 | Immunohistochemistry              | Laboratory Procedure                        | 74  | 1  |  |
| 380 | C0001551 | Immunologic Adjuvants             | Immunologic Factor                          | 37  | 1  |  |
| 381 | C0021067 | Immunoperoxidase Techniques       | Laboratory Procedure                        | 2   | 1  |  |
| 382 | C0301871 | Immunoprecipitate                 | Immunologic Factor                          | 38  | 1  |  |
| 383 | C0021069 | Immunoprecipitation               | Laboratory Procedure                        | 82  | 15 |  |
| 384 | C0677874 | In complete remission             | Finding                                     | 9   | 1  |  |
| 385 | C0544461 | Inactivation                      | Cell or Molecular Dysfunction               | 3   | 1  |  |
| 386 | C1439852 | Incubated                         | Laboratory Procedure                        | 10  | 3  |  |
| 387 | C0021311 | Infection                         | Disease or Syndrome                         | 2   | 1  |  |
| 388 | C0021359 | Infertility                       | Disease or Syndrome                         | 2   | 1  |  |
| 389 | C0021368 | Inflammation                      | Pathologic Function                         | 209 | 2  |  |
| 390 | C0083032 | Interleukin 7 Receptor            | Immunologic Factor                          | 2   | 1  |  |
| 391 | C0021760 | Interleukin-6                     | Immunologic Factor                          | 1   | 1  |  |
| 392 | C0085424 | Interleukin-9                     | Immunologic Factor                          | 1   | 1  |  |
| 393 | C0221715 | Intestinal carcinoma              | Neoplastic Process                          | 12  | 1  |  |
| 394 | C0021843 | Intestinal Obstruction            | Acquired Abnormality<br>Disease or Syndrome | 7   | 1  |  |
| 395 | C1334274 | Invasive Carcinoma                | Neoplastic Process                          | 3   | 1  |  |
| 396 | C0302583 | Iron                              | Biologically Active Substance               | 4   | 2  |  |
| 397 | C1282930 | Irradiation                       | Natural Phenomenon or Process               | 6   | 1  |  |
| 398 | C0022107 | Irritable Mood                    | Finding                                     | 3   | 1  |  |
| 399 | C0575044 | Joint problem                     | Finding                                     | 374 | 2  |  |
| 400 | C0022526 | Karyotype determination procedure | Laboratory Procedure                        | 37  | 14 |  |
| 401 | C0178725 | Karyotype result                  | Laboratory or Test Result                   | 37  | 14 |  |
| 402 | C0022564 | Keratin                           | Biologically Active Substance               | 3   | 1  |  |
| 403 | C1522225 | Knock-out                         | Experimental Model of Disease               | 5   | 2  |  |
| 404 | C0022790 | Krukenberg Tumor                  | Neoplastic Process                          | 1   | 1  |  |
| 405 | C0079748 | Large Cell Lymphoblastic Lymphoma | Neoplastic Process                          | 50  | 1  |  |
| 406 | C0024302 | Large-Cell Lymphomas              | Neoplastic Process                          | 20  | 1  |  |
| 407 | C0023269 | leiomyosarcoma                    | Neoplastic Process                          | 1   | 1  |  |
| 408 | C0855056 | Leiomyosarcoma metastatic         | Neoplastic Process                          | 1   | 1  |  |

|     |          |                                      |                               |     |   |  |
|-----|----------|--------------------------------------|-------------------------------|-----|---|--|
| 409 | C0221198 | Lesion                               | Finding                       | 39  | 1 |  |
| 410 | C0023418 | leukemia                             | Neoplastic Process            | 434 | 8 |  |
| 411 | C0023449 | Leukemia, Lymphocytic, Acute         | Neoplastic Process            | 49  | 4 |  |
| 412 | C0023458 | Leukemia, Lymphocytic, Chronic       | Neoplastic Process            | 4   | 1 |  |
| 413 | C0023467 | Leukemia, Myelocytic, Acute          | Neoplastic Process            | 2   | 1 |  |
| 414 | C0023492 | Leukemia, T-Cell                     | Neoplastic Process            | 339 | 4 |  |
| 415 | C0950624 | Leukocyte L1 Antigen Complex         | Immunologic Factor            | 202 | 1 |  |
| 416 | C0023749 | Linoleic Acid                        | Biologically Active Substance | 3   | 1 |  |
| 417 | C0023827 | liposarcoma                          | Neoplastic Process            | 33  | 2 |  |
| 418 | C1521461 | Loss of Chromosome 5q                | Cell or Molecular Dysfunction | 90  | 1 |  |
| 419 | C0024121 | Lung Neoplasms                       | Neoplastic Process            | 1   | 2 |  |
| 420 | C1524007 | Lymphoblastic leukemia               | Neoplastic Process            | 49  | 4 |  |
| 421 | C0024266 | Lymphocytic Choriomeningitis         | Disease or Syndrome           | 8   | 1 |  |
| 422 | C0024299 | Lymphoma                             | Neoplastic Process            | 360 | 6 |  |
| 423 | C0334634 | Lymphoma, Small-Cell, Centrocytic    | Neoplastic Process            | 1   | 1 |  |
| 424 | C0024337 | Lysine                               | Biologically Active Substance | 1   | 1 |  |
| 425 | C0024348 | Lysis                                | Pathologic Function           | 6   | 1 |  |
| 426 | C0008015 | Macrophage Chemotactic Factors       | Immunologic Factor            | 13  | 1 |  |
| 427 | C0065491 | macrophage inflammatory protein 2    | Biologically Active Substance | 4   | 1 |  |
| 428 | C0376579 | Macrophage Inflammatory Proteins     | Immunologic Factor            | 4   | 1 |  |
| 429 | C0079785 | Macrophage-1 Antigen                 | Immunologic Factor            | 4   | 1 |  |
| 430 | C0599662 | MACS                                 | Laboratory Procedure          | 26  | 2 |  |
| 431 | C0761585 | MADHIP protein, human                | Biologically Active Substance | 2   | 1 |  |
| 432 | C0919482 | MAF Protein                          | Biologically Active Substance | 7   | 3 |  |
| 433 | C1328924 | magnetic beads                       | Natural Phenomenon or Process | 1   | 1 |  |
| 434 | C0563532 | Magnetism                            | Natural Phenomenon or Process | 1   | 1 |  |
| 435 | C0206625 | Malignant Mixed Tumor                | Neoplastic Process            | 2   | 1 |  |
| 436 | C0006142 | Malignant neoplasm of breast         | Neoplastic Process            | 17  | 4 |  |
| 437 | C0007847 | Malignant neoplasm of cervix uteri   | Neoplastic Process            | 12  | 1 |  |
| 438 | C0278484 | Malignant neoplasm of colon stage IV | Neoplastic Process            | 41  | 3 |  |
| 439 | C0740457 | Malignant neoplasm of kidney         | Neoplastic Process            | 12  | 1 |  |
| 440 | C0345904 | Malignant neoplasm of liver          | Neoplastic Process            | 12  | 1 |  |

|     |          |                                        |                                  |      |    |  |
|-----|----------|----------------------------------------|----------------------------------|------|----|--|
| 441 | C0242379 | Malignant neoplasm of lung             | Neoplastic Process               | 13   | 2  |  |
| 442 | C0024623 | Malignant neoplasm of stomach          | Neoplastic Process               | 13   | 2  |  |
| 443 | C0153594 | Malignant neoplasm of testis           | Neoplastic Process               | 13   | 1  |  |
| 444 | C1257930 | Mammary Carcinoma, Human               | Neoplastic Process               | 13   | 1  |  |
| 445 | C0021367 | Mammary Ductal Carcinoma               | Neoplastic Process               | 13   | 1  |  |
| 446 | C0545081 | Mantle lymphoma                        | Neoplastic Process               | 1    | 1  |  |
| 447 | C0947322 | Manufacturer Name                      | Finding                          | 30   | 10 |  |
| 448 | C0577559 | Mass of body structure                 | Finding                          | 6    | 4  |  |
| 449 | C0262926 | Medical History                        | Finding                          | 1004 | 8  |  |
| 450 | C0206693 | Medullary carcinoma                    | Neoplastic Process               | 1    | 1  |  |
| 451 | C0025202 | melanoma                               | Neoplastic Process               | 372  | 6  |  |
| 452 | C0796561 | Melanoma vaccine                       | Immunologic Factor               | 372  | 6  |  |
| 453 | C0011570 | Mental Depression                      | Mental or Behavioral Dysfunction | 6    | 2  |  |
| 454 | C0333983 | Metaplastic polyp                      | Neoplastic Process               | 11   | 1  |  |
| 455 | C0220650 | Metastatic malignant neoplasm to brain | Neoplastic Process               | 1    | 2  |  |
| 456 | C0919989 | Metastatic renal carcinoma             | Neoplastic Process               | 1    | 1  |  |
| 457 | C0278678 | Metastatic renal cell carcinoma        | Neoplastic Process               | 1    | 1  |  |
| 458 | C0025723 | Methylation                            | Natural Phenomenon or Process    | 99   | 13 |  |
| 459 | C1449575 | Microarray Analysis                    | Laboratory Procedure             | 32   | 5  |  |
| 460 | C1101610 | MicroRNAs                              | Biologically Active Substance    | 214  | 10 |  |
| 461 | C0149931 | Migraine Disorders                     | Disease or Syndrome              | 2    | 1  |  |
| 462 | C1368354 | Mixed Neoplasm                         | Neoplastic Process               | 2    | 1  |  |
| 463 | C0026277 | Mixed Salivary Gland Tumor             | Neoplastic Process               | 2    | 1  |  |
| 464 | C0206627 | Mixed Tumor, Mullerian                 | Neoplastic Process               | 2    | 1  |  |
| 465 | C0425245 | Mobility as a finding                  | Finding                          | 1    | 1  |  |
| 466 | C0562577 | Mocking                                | Finding                          | 3    | 1  |  |
| 467 | C1513392 | Molecular Fingerprint of Tumor         | Clinical Attribute               | 9    | 1  |  |
| 468 | C0746619 | MONOCLONAL                             | Finding                          | 4    | 2  |  |
| 469 | C0003250 | Monoclonal Antibodies                  | Immunologic Factor               | 2    | 1  |  |
| 470 | C0128897 | Monocyte Chemoattractant Protein-1     | Immunologic Factor               | 4    | 1  |  |
| 471 | C0282566 | Monocyte Chemoattractant Proteins      | Immunologic Factor               | 4    | 1  |  |
| 472 | C1335296 | MPP1 protein, human                    | Biologically Active Substance    | 1    | 1  |  |



|     |          |                                |                               |     |    |  |
|-----|----------|--------------------------------|-------------------------------|-----|----|--|
| 473 | C1513717 | Mucinous Differentiation       | Finding                       | 1   | 1  |  |
| 474 | C0334368 | Mucin-producing adenocarcinoma | Neoplastic Process            | 2   | 1  |  |
| 475 | C0026682 | Mucins                         | Biologically Active Substance | 15  | 2  |  |
| 476 | C0026764 | Multiple Myeloma               | Neoplastic Process            | 33  | 2  |  |
| 477 | C0334108 | Multiple polyps                | Neoplastic Process            | 140 | 4  |  |
| 478 | C0080194 | Muscle strain                  | Injury or Poisoning           | 6   | 2  |  |
| 479 | C0670878 | MYBBP1A protein, human         | Biologically Active Substance | 2   | 1  |  |
| 480 | C0023470 | Myeloid Leukemia               | Neoplastic Process            | 2   | 1  |  |
| 481 | C1172734 | natalizumab                    | Immunologic Factor            | 1   | 1  |  |
| 482 | C0027498 | Nausea with vomiting           | Sign or Symptom               | 1   | 1  |  |
| 483 | C0915178 | NCOA6 protein, human           | Biologically Active Substance | 40  | 10 |  |
| 484 | C0027708 | Nephroblastoma                 | Neoplastic Process            | 62  | 1  |  |
| 485 | C0442874 | Neuropathy                     | Disease or Syndrome           | 1   | 1  |  |
| 486 | C0027960 | Nevus                          | Neoplastic Process            | 8   | 3  |  |
| 487 | C0279781 | no positive axillary nodes     | Finding                       | 4   | 1  |  |
| 488 | C0442743 | Noninflammatory                | Finding                       | 7   | 1  |  |
| 489 | C0231162 | Normal general body function   | Finding                       | 3   | 1  |  |
| 490 | C1527124 | Nottingham Score               | Clinical Attribute            | 1   | 1  |  |
| 491 | C0028602 | Nucleic Acid Hybridization     | Natural Phenomenon or Process | 358 | 25 |  |
| 492 | C0262584 | Oat cell carcinoma             | Neoplastic Process            | 339 | 4  |  |
| 493 | C1553907 | Observation Method - algorithm | Laboratory Procedure          | 10  | 2  |  |
| 494 | C0449381 | Observation parameter          | Finding                       | 60  | 1  |  |
| 495 | C0069500 | oncogene protein DBL           | Biologically Active Substance | 1   | 1  |  |
| 496 | C1268822 | Optical density function       | Clinical Attribute            | 64  | 2  |  |
| 497 | C0029463 | osteosarcoma                   | Neoplastic Process            | 339 | 4  |  |
| 498 | C1335177 | Ovarian Serous Adenocarcinoma  | Neoplastic Process            | 2   | 1  |  |
| 499 | C1441041 | P2                             | Immunologic Factor            | 2   | 1  |  |
| 500 | C0599933 | p65                            | Biologically Active Substance | 1   | 1  |  |
| 501 | C1306837 | Papillary Renal Cell Carcinoma | Neoplastic Process            | 1   | 1  |  |
| 502 | C0016169 | pathologic fistula             | Anatomical Abnormality        | 4   | 1  |  |
| 503 | C0677042 | Pathology processes            | Pathologic Function           | 212 | 4  |  |
| 504 | C0429403 | Pattern ERG P50                | Finding                       | 1   | 1  |  |

|     |          |                                      |                                             |     |   |  |
|-----|----------|--------------------------------------|---------------------------------------------|-----|---|--|
| 505 | C0347944 | Pelvic mass                          | Finding                                     | 1   | 1 |  |
| 506 | C0669679 | PER2 protein, mammalian              | Biologically Active Substance               | 4   | 1 |  |
| 507 | C0031019 | Perianal abscess                     | Acquired Abnormality<br>Disease or Syndrome | 3   | 1 |  |
| 508 | C1317608 | PERINEURAL INVASION                  | Pathologic Function                         | 119 | 1 |  |
| 509 | C0031117 | Peripheral Neuropathy                | Disease or Syndrome                         | 1   | 1 |  |
| 510 | C0085096 | Peripheral Vascular Diseases         | Disease or Syndrome                         | 1   | 1 |  |
| 511 | C0747548 | Pharyngeal Carcinoma                 | Neoplastic Process                          | 62  | 1 |  |
| 512 | C1285572 | Phenotype determination              | Laboratory Procedure                        | 124 | 4 |  |
| 513 | C0031619 | Phosphatidylglycerols                | Biologically Active Substance               | 4   | 1 |  |
| 514 | C0031789 | Phycoerythrin                        | Biologically Active Substance               | 7   | 2 |  |
| 515 | C0311392 | Physical findings                    | Sign or Symptom                             | 7   | 1 |  |
| 516 | C0700329 | Physical shape                       | Finding                                     | 74  | 6 |  |
| 517 | C0031858 | Phytohemagglutinins                  | Immunologic Factor                          | 3   | 1 |  |
| 518 | C0032131 | Plasmacytoma                         | Neoplastic Process                          | 33  | 2 |  |
| 519 | C0032136 | Plasmids                             | Biologically Active Substance               | 9   | 1 |  |
| 520 | C0032140 | Plasminogen                          | Biologically Active Substance               | 1   | 1 |  |
| 521 | C0032227 | Pleural effusion disorder            | Pathologic Function                         | 18  | 2 |  |
| 522 | C0032285 | Pneumonia                            | Disease or Syndrome                         | 1   | 1 |  |
| 523 | C0518611 | Poise                                | Finding                                     | 2   | 1 |  |
| 524 | C0083956 | Polycomb                             | Biologically Active Substance               | 1   | 1 |  |
| 525 | C0032520 | Polymerase Chain Reaction            | Laboratory Procedure                        | 134 | 9 |  |
| 526 | C0521516 | Polymyalgia                          | Sign or Symptom                             | 2   | 1 |  |
| 527 | C0032533 | Polymyalgia Rheumatica               | Disease or Syndrome                         | 2   | 1 |  |
| 528 | C1524110 | positioning                          | Biologic Function                           | 208 | 3 |  |
| 529 | C0032931 | Precipitation                        | Natural Phenomenon or Process               | 23  | 3 |  |
| 530 | C1337053 | pre-miRNA                            | Biologically Active Substance               | 1   | 1 |  |
| 531 | C0033085 | Preservation, Biological             | Laboratory Procedure                        | 17  | 3 |  |
| 532 | C1335475 | Primary Carcinoma                    | Neoplastic Process                          | 13  | 4 |  |
| 533 | C0019204 | Primary carcinoma of the liver cells | Neoplastic Process                          | 1   | 1 |  |
| 534 | C0553573 | Primary infertility                  | Disease or Syndrome                         | 2   | 1 |  |
| 535 | C0279000 | Primary Liver Carcinoma              | Neoplastic Process                          | 12  | 1 |  |

|     |          |                                                |                                               |     |    |  |
|-----|----------|------------------------------------------------|-----------------------------------------------|-----|----|--|
| 536 | C1306459 | Primary malignant neoplasm                     | Neoplastic Process                            | 4   | 1  |  |
| 537 | C0475447 | Primary tumor site                             | Clinical Attribute                            | 106 | 2  |  |
| 538 | C0033213 | Problem                                        | Finding                                       | 41  | 3  |  |
| 539 | C1522240 | Process                                        | Phenomenon or Process                         | 126 | 6  |  |
| 540 | C1548180 | Production Processing ID                       | Finding                                       | 10  | 2  |  |
| 541 | C0033382 | Proline                                        | Biologically Active Substance                 | 61  | 2  |  |
| 542 | C0086860 | Promotor                                       | Biologically Active Substance                 | 73  | 6  |  |
| 543 | C0033413 | Promotor Regions                               | Biologically Active Substance                 | 40  | 1  |  |
| 544 | C1335532 | Protein Family                                 | Biologically Active Substance                 | 1   | 1  |  |
| 545 | C0428479 | Protein level - finding                        | Laboratory or Test Result                     | 4   | 1  |  |
| 546 | C0067033 | Proteinase 3                                   | Immunologic Factor                            | 1   | 1  |  |
| 547 | C0033684 | Proteins                                       | Biologically Active Substance                 | 136 | 10 |  |
| 548 | C0072470 | Proto-Oncogene Protein c-kit                   | Immunologic Factor                            | 2   | 1  |  |
| 549 | C0072473 | Proto-Oncogene Proteins c-myb                  | Biologically Active Substance                 | 1   | 1  |  |
| 550 | C0080065 | Proto-Oncogene Proteins c-myc                  | Biologically Active Substance                 | 26  | 5  |  |
| 551 | C0700164 | proven venom                                   | Biologically Active Substance                 | 1   | 1  |  |
| 552 | C1257843 | pseudomembranous colitis                       | Disease or Syndrome                           | 2   | 2  |  |
| 553 | C0033377 | Ptoxis                                         | Anatomical Abnormality<br>Disease or Syndrome | 1   | 1  |  |
| 554 | C0243114 | purification                                   | Laboratory Procedure                          | 98  | 3  |  |
| 555 | C1446777 | Rabbit antigen                                 | Immunologic Factor                            | 11  | 4  |  |
| 556 | C0034553 | Radioactivity                                  | Natural Phenomenon or Process                 | 41  | 3  |  |
| 557 | C1384668 | radiotherapy                                   | Finding                                       | 38  | 1  |  |
| 558 | C0249759 | RBL2 protein, human                            | Biologically Active Substance                 | 2   | 1  |  |
| 559 | C0596012 | Reaches                                        | Finding                                       | 64  | 2  |  |
| 560 | C1524094 | Recombinant Cytokines                          | Immunologic Factor                            | 4   | 1  |  |
| 561 | C1522558 | Recombinant Monocyte Chemoattractant Protein-1 | Immunologic Factor                            | 4   | 1  |  |
| 562 | C1527194 | Recombinant Transforming Growth Factor         | Biologically Active Substance                 | 1   | 1  |  |
| 563 | C1522669 | Recombinant Tumor Necrosis Factor-Alpha        | Immunologic Factor                            | 22  | 2  |  |
| 564 | C0034885 | Rectal Neoplasms                               | Neoplastic Process                            | 234 | 4  |  |
| 565 | C1527408 | Rectal Tumors                                  | Disease or Syndrome                           | 234 | 4  |  |
| 566 | C1327622 | Regulation of biological process               | Biologic Function                             | 20  | 1  |  |

|     |          |                                               |                               |      |    |  |
|-----|----------|-----------------------------------------------|-------------------------------|------|----|--|
| 567 | C0035012 | Reiter Disease                                | Disease or Syndrome           | 3    | 1  |  |
| 568 | C0919436 | REL Protein                                   | Biologically Active Substance | 41   | 1  |  |
| 569 | C0445223 | Related personal status                       | Finding                       | 9    | 2  |  |
| 570 | C1378703 | Renal carcinoma                               | Neoplastic Process            | 13   | 2  |  |
| 571 | C0007134 | Renal Cell Carcinoma                          | Neoplastic Process            | 1    | 1  |  |
| 572 | C0151747 | Renal tubular disorder                        | Disease or Syndrome           | 40   | 2  |  |
| 573 | C1514850 | Replication Error                             | Cell or Molecular Dysfunction | 34   | 3  |  |
| 574 | C0871261 | response                                      | Clinical Attribute            | 438  | 16 |  |
| 575 | C0035328 | Retinal Vein Occlusion                        | Disease or Syndrome           | 2    | 1  |  |
| 576 | C0003873 | Rheumatoid Arthritis                          | Disease or Syndrome           | 3    | 2  |  |
| 577 | C0383269 | Rho Guanine Nucleotide Exchange Factor 5      | Biologically Active Substance | 1    | 1  |  |
| 578 | C0035696 | RNA, Messenger                                | Biologically Active Substance | 376  | 22 |  |
| 579 | C0043309 | Roentgen Rays                                 | Natural Phenomenon or Process | 40   | 10 |  |
| 580 | C0217373 | RTN1 protein, human                           | Biologically Active Substance | 2    | 1  |  |
| 581 | C1522662 | sample fixation                               | Laboratory Procedure          | 23   | 1  |  |
| 582 | C1509144 | Sample pool                                   | Clinical Attribute            | 1087 | 38 |  |
| 583 | C0237849 | Scaling                                       | Finding                       | 9    | 2  |  |
| 584 | C0036285 | Scarlet Fever                                 | Disease or Syndrome           | 3    | 1  |  |
| 585 | C0751623 | Second Primary Cancers                        | Neoplastic Process            | 6    | 1  |  |
| 586 | C0205254 | Sedentary                                     | Finding                       | 1    | 1  |  |
| 587 | C0086972 | Separated from cohabitee                      | Finding                       | 4    | 1  |  |
| 588 | C0258846 | SHH protein, human                            | Biologically Active Substance | 3    | 1  |  |
| 589 | C0426857 | Short arm                                     | Finding                       | 1    | 1  |  |
| 590 | C0149925 | Small cell carcinoma of lung                  | Neoplastic Process            | 339  | 4  |  |
| 591 | C1367790 | Small Nuclear Ribonucleoprotein Polypeptide F | Biologically Active Substance | 2    | 1  |  |
| 592 | C0248587 | SMARCA4 protein, human                        | Biologically Active Substance | 1    | 1  |  |
| 593 | C0337664 | Smoker                                        | Finding                       | 24   | 1  |  |
| 594 | C1519386 | Smoking Status                                | Clinical Attribute            | 374  | 2  |  |
| 595 | C1519388 | Smooth Muscle Actin Staining Method           | Laboratory Procedure          | 2    | 1  |  |
| 596 | C0037420 | Social Interaction                            | Finding                       | 4    | 1  |  |
| 597 | C0037473 | Sodium                                        | Biologically Active Substance | 140  | 6  |  |
| 598 | C0037494 | Sodium Chloride                               | Biologically Active Substance | 102  | 4  |  |

|     |          |                                 |                               |     |    |  |
|-----|----------|---------------------------------|-------------------------------|-----|----|--|
| 599 | C0746416 | Soft mass                       | Finding                       | 1   | 1  |  |
| 600 | C0457193 | Soft tissue mass                | Anatomical Abnormality        | 1   | 1  |  |
| 601 | C1409616 | Special screening finding       | Finding                       | 321 | 1  |  |
| 602 | C0443640 | Specific antibody               | Immunologic Factor            | 8   | 1  |  |
| 603 | C0037805 | Spectrophotometry               | Laboratory Procedure          | 155 | 3  |  |
| 604 | C0007137 | Squamous cell carcinoma         | Neoplastic Process            | 341 | 5  |  |
| 605 | C0333873 | Squamous intraepithelial lesion | Cell or Molecular Dysfunction | 2   | 1  |  |
| 606 | C0278474 | Stage I Colon Cancer            | Neoplastic Process            | 16  | 1  |  |
| 607 | C0278479 | Stage II Colon Cancer           | Neoplastic Process            | 25  | 2  |  |
| 608 | C0280252 | stage, colon cancer             | Neoplastic Process            | 25  | 2  |  |
| 609 | C0487602 | Staining method                 | Laboratory Procedure          | 51  | 9  |  |
| 610 | C0699791 | Stomach Carcinoma               | Neoplastic Process            | 15  | 3  |  |
| 611 | C0430414 | Stool culture                   | Laboratory Procedure          | 6   | 2  |  |
| 612 | C1510453 | strain symptom                  | Sign or Symptom               | 6   | 2  |  |
| 613 | C0075278 | Streptavidin                    | Biologically Active Substance | 7   | 2  |  |
| 614 | C0038435 | Stress                          | Finding                       | 17  | 2  |  |
| 615 | C0333187 | Stricture                       | Anatomical Abnormality        | 172 | 1  |  |
| 616 | C0879615 | Stromal Neoplasm                | Neoplastic Process            | 2   | 1  |  |
| 617 | C0038636 | Sucrose                         | Biologically Active Substance | 6   | 1  |  |
| 618 | C1317973 | SUPPORT                         | Clinical Attribute            | 17  | 2  |  |
| 619 | C0549433 | Surgical intervention           | Finding                       | 9   | 1  |  |
| 620 | C1457887 | Symptoms                        | Sign or Symptom               | 649 | 3  |  |
| 621 | C0869032 | Synthesis                       | Phenomenon or Process         | 172 | 8  |  |
| 622 | C0084726 | T Cell Transcription Factor 1   | Biologically Active Substance | 1   | 1  |  |
| 623 | C0087051 | T-Cell Receptor gamma-Chain     | Immunologic Factor            | 91  | 2  |  |
| 624 | C1566664 | TCF Transcription Factors       | Biologically Active Substance | 1   | 1  |  |
| 625 | C0039538 | Teratoma                        | Neoplastic Process            | 13  | 1  |  |
| 626 | C0080222 | TGFB1 protein, human            | Biologically Active Substance | 1   | 1  |  |
| 627 | C0040048 | Thromboplastin                  | Immunologic Factor            | 1   | 1  |  |
| 628 | C0076582 | thymidine 5'-triphosphate       | Biologically Active Substance | 3   | 1  |  |
| 629 | C0040284 | Tissue culture                  | Laboratory Procedure          | 6   | 2  |  |
| 630 | C0010957 | Tissue damage                   | Injury or Poisoning           | 40  | 10 |  |

|     |          |                                        |                               |     |   |  |
|-----|----------|----------------------------------------|-------------------------------|-----|---|--|
| 631 | C0920664 | tissue preparation                     | Laboratory Procedure          | 18  | 3 |  |
| 632 | C0162621 | Titration                              | Laboratory Procedure          | 2   | 1 |  |
| 633 | C1448177 | TNF protein, human                     | Biologically Active Substance | 22  | 2 |  |
| 634 | C0543414 | Tobacco use                            | Finding                       | 446 | 1 |  |
| 635 | C0040648 | TRANSCRIPTION FACTOR                   | Biologically Active Substance | 5   | 2 |  |
| 636 | C1336780 | Transcription Factor 3                 | Biologically Active Substance | 1   | 1 |  |
| 637 | C0761476 | transcriptional coactivator p52        | Biologically Active Substance | 1   | 1 |  |
| 638 | C1540850 | Transferring                           | Biologic Function             | 3   | 1 |  |
| 639 | C0728827 | Transfers                              | Finding                       | 3   | 1 |  |
| 640 | C0040690 | Transforming Growth Factor beta        | Biologically Active Substance | 3   | 2 |  |
| 641 | C0079441 | Transforming Growth Factor Beta 2      | Biologically Active Substance | 1   | 1 |  |
| 642 | C0040691 | Transforming Growth Factors            | Biologically Active Substance | 1   | 1 |  |
| 643 | C0279680 | Transitional cell carcinoma of bladder | Neoplastic Process            | 339 | 4 |  |
| 644 | C0041249 | Tryptophan                             | Biologically Active Substance | 2   | 3 |  |
| 645 | C1269955 | Tumor Cell Invasion                    | Finding                       | 133 | 3 |  |
| 646 | C0598934 | tumor growth                           | Neoplastic Process            | 20  | 1 |  |
| 647 | C1456820 | Tumor Necrosis Factor-alpha            | Immunologic Factor            | 22  | 2 |  |
| 648 | C0041582 | Ulcer                                  | Pathologic Function           | 10  | 1 |  |
| 649 | C0041609 | Ultracentrifugation                    | Laboratory Procedure          | 6   | 1 |  |
| 650 | C0041625 | Ultraviolet Rays                       | Natural Phenomenon or Process | 67  | 3 |  |
| 651 | C0205698 | Undifferentiated carcinoma             | Neoplastic Process            | 1   | 1 |  |
| 652 | C0445356 | Unrelated                              | Finding                       | 19  | 1 |  |
| 653 | C0042221 | Vacuum                                 | Natural Phenomenon or Process | 4   | 1 |  |
| 654 | C0205990 | Vaginal Prolapse                       | Acquired Abnormality          | 1   | 1 |  |
| 655 | C1558950 | VASCULAR                               | Pathologic Function           | 120 | 2 |  |
| 656 | C0042373 | Vascular Diseases                      | Disease or Syndrome           | 1   | 1 |  |
| 657 | C0241669 | Venous occlusion                       | Pathologic Function           | 2   | 1 |  |
| 658 | C0042666 | Vimentin                               | Biologically Active Substance | 1   | 1 |  |
| 659 | C0042769 | Virus Diseases                         | Disease or Syndrome           | 1   | 1 |  |
| 660 | C0221103 | Visual Suppression                     | Pathologic Function           | 12  | 1 |  |
| 661 | C0202498 | Warfarin Measurement                   | Laboratory Procedure          | 2   | 1 |  |
| 662 | C0442730 | Weakly positive                        | Finding                       | 1   | 1 |  |

|     |          |                                  |                               |    |   |  |
|-----|----------|----------------------------------|-------------------------------|----|---|--|
| 663 | C0949466 | Western Blot                     | Laboratory Procedure          | 20 | 1 |  |
| 664 | C0023508 | White Blood Cell Count procedure | Laboratory Procedure          | 3  | 1 |  |
| 665 | C0043481 | Zinc                             | Biologically Active Substance | 4  | 1 |  |

Table S7

| Index | Gene_Symbol | Sources | Reliability |
|-------|-------------|---------|-------------|
| 1     | AACS        | GEO     | *           |
| 2     | AADAT       | GEO     | *           |
| 3     | AARSD1      | GEO     | *           |
| 4     | ABCA5       | GEO     | *           |
| 5     | ABCA6       | GEO     | *           |
| 6     | ABCA8       | GEO     | *           |
| 7     | ABCB1       | Both    | *           |
| 8     | ABCC2       | Both    | *           |
| 9     | ABCC3       | Both    | *           |
| 10    | ABCG2       | Both    | *           |
| 11    | ABHD2       | GEO     | *           |
| 12    | ABHD3       | GEO     | *           |
| 13    | ABI3BP      | GEO     | *           |
| 14    | ABP1        | Both    | *           |
| 15    | ACAD10      | GEO     | *           |
| 16    | ACADS       | GEO     | *           |
| 17    | ACAN        | GEO     | *           |
| 18    | ACBD5       | GEO     | *           |
| 19    | ACCN2       | GEO     | *           |
| 20    | ACP6        | GEO     | *           |
| 21    | ACSL5       | GEO     | *           |
| 22    | ACSL6       | GEO     | *           |
| 23    | ACSS1       | GEO     | *           |
| 24    | ACTG2       | GEO     | *           |
| 25    | ACTN1       | GEO     | *           |
| 26    | ACTR2       | GEO     | *           |
| 27    | ACVR1C      | GEO     | *           |
| 28    | ACVR2B      | GEO     | *           |
| 29    | ADA         | Both    | *           |
| 30    | ADAL        | GEO     | *           |
| 31    | ADAM12      | GEO     | *           |
| 32    | ADAMDEC1    | GEO     | *           |
| 33    | ADAMTS1     | GEO     | *           |
| 34    | ADAMTS12    | GEO     | *           |
| 35    | ADAMTS2     | GEO     | *           |
| 36    | ADAMTS6     | GEO     | *           |
| 37    | ADAP2       | GEO     | *           |
| 38    | ADH1A       | Both    | *           |
| 39    | ADH1B       | Both    | *           |
| 40    | ADH1C       | Both    | *           |
| 41    | ADHFE1      | GEO     | *           |
| 42    | ADII        | GEO     | *           |
| 43    | ADPRHL1     | GEO     | *           |
| 44    | ADSL        | GEO     | *           |
| 45    | ADSSL1      | GEO     | *           |
| 46    | AFF4        | GEO     | *           |
| 47    | AFMID       | GEO     | *           |
| 48    | AGPAT9      | GEO     | *           |

|    |         |      |   |
|----|---------|------|---|
| 49 | AGR2    | Both | * |
| 50 | AGR3    | GEO  | * |
| 51 | AHCY    | Both | * |
| 52 | AHCYL2  | GEO  | * |
| 53 | AHI1    | GEO  | * |
| 54 | AHNAK   | GEO  | * |
| 55 | AHNAK2  | GEO  | * |
| 56 | AHR     | Both | * |
| 57 | AIDA    | GEO  | * |
| 58 | AIF1L   | GEO  | * |
| 59 | AIM1    | GEO  | * |
| 60 | AKAP2   | GEO  | * |
| 61 | AKAP5   | GEO  | * |
| 62 | AKR1B10 | GEO  | * |
| 63 | AKR1C1  | GEO  | * |
| 64 | AKR1C3  | GEO  | * |
| 65 | AKT2    | GEO  | * |
| 66 | AKT3    | GEO  | * |
| 67 | ALDH1A1 | GEO  | * |
| 68 | ALDH3B2 | GEO  | * |
| 69 | ALG3    | GEO  | * |
| 70 | ALOX5   | Both | * |
| 71 | AMACR   | Both | * |
| 72 | AMIGO2  | GEO  | * |
| 73 | AMOT    | GEO  | * |
| 74 | AMOTL1  | GEO  | * |
| 75 | AMPD2   | GEO  | * |
| 76 | ANGPT2  | GEO  | * |
| 77 | ANGPTL1 | GEO  | * |
| 78 | ANK2    | GEO  | * |
| 79 | ANK3    | GEO  | * |
| 80 | ANKFY1  | GEO  | * |
| 81 | ANKRD22 | GEO  | * |
| 82 | ANKRD29 | GEO  | * |
| 83 | ANKRD46 | GEO  | * |
| 84 | ANKRD6  | GEO  | * |
| 85 | ANKS4B  | GEO  | * |
| 86 | ANO5    | GEO  | * |
| 87 | ANP32E  | GEO  | * |
| 88 | ANPEP   | GEO  | * |
| 89 | ANTXR1  | GEO  | * |
| 90 | ANUBL1  | GEO  | * |
| 91 | ANXA3   | GEO  | * |
| 92 | ANXA4   | GEO  | * |
| 93 | ANXA9   | GEO  | * |
| 94 | AP2M1   | GEO  | * |
| 95 | AP3M1   | GEO  | * |
| 96 | APBB1   | GEO  | * |
| 97 | APBB2   | GEO  | * |
| 98 | APOE    | Both | * |



|     |          |      |   |
|-----|----------|------|---|
| 99  | APOH     | GEO  | * |
| 100 | AQP1     | GEO  | * |
| 101 | AQP8     | GEO  | * |
| 102 | AQR      | GEO  | * |
| 103 | ARAP3    | GEO  | * |
| 104 | ARHGAP15 | GEO  | * |
| 105 | ARHGAP4  | GEO  | * |
| 106 | ARHGAP42 | GEO  | * |
| 107 | ARHGAP44 | GEO  | * |
| 108 | ARHGEF10 | GEO  | * |
| 109 | ARHGEF6  | GEO  | * |
| 110 | ARIH2    | GEO  | * |
| 111 | ARL14    | GEO  | * |
| 112 | ARL4C    | GEO  | * |
| 113 | ARL6IP5  | GEO  | * |
| 114 | ARMC6    | GEO  | * |
| 115 | ARMC8    | GEO  | * |
| 116 | ARMCX1   | GEO  | * |
| 117 | ARNT2    | GEO  | * |
| 118 | ARNTL2   | GEO  | * |
| 119 | ARRB1    | GEO  | * |
| 120 | ARRDC1   | GEO  | * |
| 121 | ARSE     | GEO  | * |
| 122 | ARSJ     | GEO  | * |
| 123 | ASAH1    | GEO  | * |
| 124 | ASAP2    | GEO  | * |
| 125 | ASB2     | GEO  | * |
| 126 | ASB9     | GEO  | * |
| 127 | ASCL2    | GEO  | * |
| 128 | ASNS     | GEO  | * |
| 129 | ASPA     | GEO  | * |
| 130 | ASPH     | GEO  | * |
| 131 | ASPHD1   | GEO  | * |
| 132 | ASPN     | GEO  | * |
| 133 | ASRGL1   | GEO  | * |
| 134 | ATG12    | Both | * |
| 135 | ATL1     | GEO  | * |
| 136 | ATP10D   | GEO  | * |
| 137 | ATP1B1   | GEO  | * |
| 138 | ATP2C2   | GEO  | * |
| 139 | ATP5S    | GEO  | * |
| 140 | ATP8A1   | GEO  | * |
| 141 | ATP8B2   | GEO  | * |
| 142 | AURKA    | Both | * |
| 143 | AXIN2    | Both | * |
| 144 | AXL      | GEO  | * |
| 145 | B3GALNT1 | GEO  | * |
| 146 | B3GALTL  | GEO  | * |
| 147 | B3GNT7   | GEO  | * |
| 148 | BACE2    | GEO  | * |

|     |           |      |   |
|-----|-----------|------|---|
| 149 | BARX2     | GEO  | * |
| 150 | BAT1      | Both | * |
| 151 | BCAR3     | GEO  | * |
| 152 | BCAS1     | GEO  | * |
| 153 | BCL2L11   | GEO  | * |
| 154 | BDH1      | GEO  | * |
| 155 | BEST4     | GEO  | * |
| 156 | BEX4      | GEO  | * |
| 157 | BFSP1     | GEO  | * |
| 158 | BGN       | GEO  | * |
| 159 | BHLHB9    | GEO  | * |
| 160 | BMP2      | Both | * |
| 161 | BMP3      | GEO  | * |
| 162 | BMP7      | GEO  | * |
| 163 | BOP1      | GEO  | * |
| 164 | BRP44     | GEO  | * |
| 165 | BRP44L    | GEO  | * |
| 166 | BSPRY     | GEO  | * |
| 167 | BTC       | GEO  | * |
| 168 | BTG3      | GEO  | * |
| 169 | BTNL3     | GEO  | * |
| 170 | BUB3      | GEO  | * |
| 171 | C10orf10  | GEO  | * |
| 172 | C10orf116 | GEO  | * |
| 173 | C10orf81  | GEO  | * |
| 174 | C10orf99  | GEO  | * |
| 175 | C11orf96  | GEO  | * |
| 176 | C12orf4   | GEO  | * |
| 177 | C12orf75  | GEO  | * |
| 178 | C13orf27  | GEO  | * |
| 179 | C13orf3   | GEO  | * |
| 180 | C14orf139 | GEO  | * |
| 181 | C15orf48  | GEO  | * |
| 182 | C17orf51  | GEO  | * |
| 183 | C17orf68  | GEO  | * |
| 184 | C17orf75  | GEO  | * |
| 185 | C17orf91  | GEO  | * |
| 186 | C1GALT1   | GEO  | * |
| 187 | C1orf115  | GEO  | * |
| 188 | C1orf135  | GEO  | * |
| 189 | C1orf210  | GEO  | * |
| 190 | C1orf59   | GEO  | * |
| 191 | C1orf61   | GEO  | * |
| 192 | C2        | Both | * |
| 193 | C20orf20  | GEO  | * |
| 194 | C20orf24  | GEO  | * |
| 195 | C20orf46  | GEO  | * |
| 196 | C21orf91  | GEO  | * |
| 197 | C22orf29  | GEO  | * |
| 198 | C2orf88   | GEO  | * |

|     |          |      |   |
|-----|----------|------|---|
| 199 | C3orf39  | GEO  | * |
| 200 | C4orf18  | GEO  | * |
| 201 | C4orf19  | GEO  | * |
| 202 | C4orf3   | GEO  | * |
| 203 | C4orf34  | GEO  | * |
| 204 | C4orf46  | GEO  | * |
| 205 | C6orf105 | GEO  | * |
| 206 | C6orf141 | GEO  | * |
| 207 | C6orf150 | GEO  | * |
| 208 | C6orf162 | GEO  | * |
| 209 | C6orf204 | GEO  | * |
| 210 | C6orf35  | GEO  | * |
| 211 | C7       | GEO  | * |
| 212 | C7orf41  | GEO  | * |
| 213 | C7orf44  | GEO  | * |
| 214 | C7orf68  | GEO  | * |
| 215 | C8orf47  | GEO  | * |
| 216 | C9orf125 | GEO  | * |
| 217 | C9orf41  | GEO  | * |
| 218 | C9orf64  | GEO  | * |
| 219 | C9orf68  | GEO  | * |
| 220 | CA1      | GEO  | * |
| 221 | CA12     | GEO  | * |
| 222 | CA2      | GEO  | * |
| 223 | CA4      | GEO  | * |
| 224 | CA7      | GEO  | * |
| 225 | CA9      | GEO  | * |
| 226 | CACHD1   | GEO  | * |
| 227 | CACNA1D  | GEO  | * |
| 228 | CACNA2D1 | GEO  | * |
| 229 | CAD      | GEO  | * |
| 230 | CALD1    | GEO  | * |
| 231 | CAPN5    | GEO  | * |
| 232 | CAPN9    | GEO  | * |
| 233 | CASC3    | GEO  | * |
| 234 | CASP6    | Both | * |
| 235 | CBFB     | GEO  | * |
| 236 | CBS      | Both | * |
| 237 | CBX2     | GEO  | * |
| 238 | CBX3     | GEO  | * |
| 239 | CBX6     | GEO  | * |
| 240 | CC2D2A   | GEO  | * |
| 241 | CCDC50   | GEO  | * |
| 242 | CCDC68   | GEO  | * |
| 243 | CCDC69   | GEO  | * |
| 244 | CCDC80   | GEO  | * |
| 245 | CCL14    | GEO  | * |
| 246 | CCL15    | GEO  | * |
| 247 | CCL20    | GEO  | * |
| 248 | CCL23    | GEO  | * |

|     |          |      |   |
|-----|----------|------|---|
| 249 | CCL7     | Both | * |
| 250 | CCNF     | GEO  | * |
| 251 | CCNG2    | GEO  | * |
| 252 | CD109    | GEO  | * |
| 253 | CD14     | Both | * |
| 254 | CD163    | GEO  | * |
| 255 | CD177    | GEO  | * |
| 256 | CD24     | GEO  | * |
| 257 | CD36     | Both | * |
| 258 | CD44     | GEO  | * |
| 259 | CD48     | GEO  | * |
| 260 | CD59     | GEO  | * |
| 261 | CD70     | GEO  | * |
| 262 | CD79A    | GEO  | * |
| 263 | CD81     | GEO  | * |
| 264 | CD97     | GEO  | * |
| 265 | CDADC1   | GEO  | * |
| 266 | CDC25B   | GEO  | * |
| 267 | CDC42BPA | GEO  | * |
| 268 | CDC42EP1 | GEO  | * |
| 269 | CDC42EP5 | GEO  | * |
| 270 | CDC6     | GEO  | * |
| 271 | CDH1     | Both | * |
| 272 | CDH2     | GEO  | * |
| 273 | CDH3     | Both | * |
| 274 | CDH6     | GEO  | * |
| 275 | CDK19    | GEO  | * |
| 276 | CDK4     | GEO  | * |
| 277 | CDKL5    | GEO  | * |
| 278 | CDKN1C   | GEO  | * |
| 279 | CDKN2A   | Both | * |
| 280 | CDKN2B   | Both | * |
| 281 | CEACAM1  | GEO  | * |
| 282 | CEACAM5  | GEO  | * |
| 283 | CEACAM6  | GEO  | * |
| 284 | CEACAM7  | GEO  | * |
| 285 | CENPC1   | GEO  | * |
| 286 | CERK     | GEO  | * |
| 287 | CES2     | Both | * |
| 288 | CFB      | GEO  | * |
| 289 | CFD      | GEO  | * |
| 290 | CFH      | Both | * |
| 291 | CFL2     | GEO  | * |
| 292 | CFTR     | Both | * |
| 293 | CHGA     | GEO  | * |
| 294 | CHI3L1   | GEO  | * |
| 295 | CHL1     | GEO  | * |
| 296 | CHMP4B   | GEO  | * |
| 297 | CHP2     | GEO  | * |
| 298 | CHRM3    | GEO  | * |

|     |         |      |   |
|-----|---------|------|---|
| 299 | CHST11  | GEO  | * |
| 300 | CHST6   | GEO  | * |
| 301 | CIRBP   | GEO  | * |
| 302 | CIRH1A  | GEO  | * |
| 303 | CITED1  | GEO  | * |
| 304 | CKB     | GEO  | * |
| 305 | CLCA1   | GEO  | * |
| 306 | CLCA4   | GEO  | * |
| 307 | CLCN2   | GEO  | * |
| 308 | CLDN1   | GEO  | * |
| 309 | CLDN2   | GEO  | * |
| 310 | CLDN23  | GEO  | * |
| 311 | CLEC1A  | GEO  | * |
| 312 | CLEC2B  | GEO  | * |
| 313 | CLEC3B  | GEO  | * |
| 314 | CLIC3   | GEO  | * |
| 315 | CLIC5   | GEO  | * |
| 316 | CLMN    | GEO  | * |
| 317 | CLN6    | GEO  | * |
| 318 | CLRN3   | GEO  | * |
| 319 | CLU     | GEO  | * |
| 320 | CMAH    | GEO  | * |
| 321 | CMTM4   | GEO  | * |
| 322 | CNIH3   | GEO  | * |
| 323 | CNNM2   | GEO  | * |
| 324 | CNRIP1  | GEO  | * |
| 325 | CNTN1   | GEO  | * |
| 326 | CNTN3   | GEO  | * |
| 327 | COL10A1 | GEO  | * |
| 328 | COL11A1 | Both | * |
| 329 | COL13A1 | GEO  | * |
| 330 | COL17A1 | GEO  | * |
| 331 | COL1A1  | GEO  | * |
| 332 | COL1A2  | GEO  | * |
| 333 | COL28A1 | GEO  | * |
| 334 | COL3A1  | GEO  | * |
| 335 | COL6A1  | GEO  | * |
| 336 | COL6A2  | GEO  | * |
| 337 | COL9A3  | GEO  | * |
| 338 | COLEC11 | GEO  | * |
| 339 | COLEC12 | GEO  | * |
| 340 | COMT    | Both | * |
| 341 | COPS2   | GEO  | * |
| 342 | COPS7A  | GEO  | * |
| 343 | COQ10A  | GEO  | * |
| 344 | CORO2A  | GEO  | * |
| 345 | CP      | GEO  | * |
| 346 | CPA3    | GEO  | * |
| 347 | CPM     | GEO  | * |
| 348 | CPNE8   | GEO  | * |

|     |            |      |   |
|-----|------------|------|---|
| 349 | CPSF4      | GEO  | * |
| 350 | CPT2       | GEO  | * |
| 351 | CRAT       | GEO  | * |
| 352 | CREB3L1    | GEO  | * |
| 353 | CREG2      | GEO  | * |
| 354 | CRISPLD2   | GEO  | * |
| 355 | CRP        | Both | * |
| 356 | CSDA       | GEO  | * |
| 357 | CSE1L      | GEO  | * |
| 358 | CSF1R      | Both | * |
| 359 | CSF2       | GEO  | * |
| 360 | CSGALNACT1 | GEO  | * |
| 361 | CST6       | GEO  | * |
| 362 | CTAGE5     | GEO  | * |
| 363 | CTSC       | GEO  | * |
| 364 | CTSK       | GEO  | * |
| 365 | CTSL1      | GEO  | * |
| 366 | CTSZ       | GEO  | * |
| 367 | CUL9       | GEO  | * |
| 368 | CUZD1      | GEO  | * |
| 369 | CWH43      | GEO  | * |
| 370 | CXADR      | GEO  | * |
| 371 | CXCL1      | GEO  | * |
| 372 | CXCL12     | Both | * |
| 373 | CXCL16     | GEO  | * |
| 374 | CXCL3      | GEO  | * |
| 375 | CXXC4      | GEO  | * |
| 376 | CYB5R4     | GEO  | * |
| 377 | CYFIP2     | GEO  | * |
| 378 | CYGB       | GEO  | * |
| 379 | CYLD       | GEO  | * |
| 380 | CYP1B1     | Both | * |
| 381 | CYP39A1    | GEO  | * |
| 382 | CYS1       | GEO  | * |
| 383 | DAPK1      | Both | * |
| 384 | DAPP1      | GEO  | * |
| 385 | DCLK1      | GEO  | * |
| 386 | DCN        | GEO  | * |
| 387 | DCP2       | GEO  | * |
| 388 | DCPS       | GEO  | * |
| 389 | DCTN4      | GEO  | * |
| 390 | DDAH1      | GEO  | * |
| 391 | DDB1       | GEO  | * |
| 392 | DDI2       | GEO  | * |
| 393 | DDR2       | GEO  | * |
| 394 | DDX50      | GEO  | * |
| 395 | DDX54      | GEO  | * |
| 396 | DDX55      | GEO  | * |
| 397 | DEF6       | GEO  | * |
| 398 | DEGS2      | GEO  | * |

|     |          |      |   |
|-----|----------|------|---|
| 399 | DENND1B  | Both | * |
| 400 | DENND2A  | GEO  | * |
| 401 | DENND5B  | GEO  | * |
| 402 | DES      | GEO  | * |
| 403 | DGKE     | GEO  | * |
| 404 | DGKG     | GEO  | * |
| 405 | DHRS11   | GEO  | * |
| 406 | DHRS8    | GEO  | * |
| 407 | DHRS9    | GEO  | * |
| 408 | DHX30    | GEO  | * |
| 409 | DHX57    | GEO  | * |
| 410 | DIABLO   | GEO  | * |
| 411 | DIO2     | GEO  | * |
| 412 | DKC1     | GEO  | * |
| 413 | DMKN     | GEO  | * |
| 414 | DMXL2    | GEO  | * |
| 415 | DNAH5    | GEO  | * |
| 416 | DNAJC15  | GEO  | * |
| 417 | DNAJC16  | GEO  | * |
| 418 | DNAJC18  | GEO  | * |
| 419 | DNAJC19  | GEO  | * |
| 420 | DNAJC22  | GEO  | * |
| 421 | DNM3     | GEO  | * |
| 422 | DOCK10   | GEO  | * |
| 423 | DOCK11   | GEO  | * |
| 424 | DOCK4    | GEO  | * |
| 425 | DPEP1    | GEO  | * |
| 426 | DPF2     | GEO  | * |
| 427 | DPP7     | GEO  | * |
| 428 | DPY19L1  | GEO  | * |
| 429 | DPY19L4  | GEO  | * |
| 430 | DSC2     | GEO  | * |
| 431 | DSE      | GEO  | * |
| 432 | DST      | GEO  | * |
| 433 | DTD1     | GEO  | * |
| 434 | DUSP14   | GEO  | * |
| 435 | DUSP26   | GEO  | * |
| 436 | DVL2     | GEO  | * |
| 437 | DYNC1LI1 | GEO  | * |
| 438 | DYNC1LI2 | GEO  | * |
| 439 | DZIP3    | GEO  | * |
| 440 | E2F8     | GEO  | * |
| 441 | EARS2    | GEO  | * |
| 442 | EBAG9    | GEO  | * |
| 443 | ECH1     | GEO  | * |
| 444 | ECHDC1   | GEO  | * |
| 445 | ECM2     | GEO  | * |
| 446 | ECT2     | GEO  | * |
| 447 | EDEM2    | GEO  | * |
| 448 | EDIL3    | GEO  | * |

|     |         |      |   |
|-----|---------|------|---|
| 449 | EDN3    | GEO  | * |
| 450 | EEF1A2  | GEO  | * |
| 451 | EEPD1   | GEO  | * |
| 452 | EFNA5   | GEO  | * |
| 453 | EFTUD2  | GEO  | * |
| 454 | EGFL6   | GEO  | * |
| 455 | EHF     | GEO  | * |
| 456 | EIF2C2  | GEO  | * |
| 457 | EIF3B   | GEO  | * |
| 458 | EIF5A   | GEO  | * |
| 459 | ELFN2   | GEO  | * |
| 460 | ELL3    | GEO  | * |
| 461 | ELOVL5  | GEO  | * |
| 462 | EMP1    | GEO  | * |
| 463 | EMP2    | GEO  | * |
| 464 | ENC1    | GEO  | * |
| 465 | ENDOD1  | GEO  | * |
| 466 | ENO1    | GEO  | * |
| 467 | ENPP1   | GEO  | * |
| 468 | ENTPD5  | Both | * |
| 469 | EPB41L1 | GEO  | * |
| 470 | EPB41L3 | GEO  | * |
| 471 | EPDR1   | GEO  | * |
| 472 | EPHA2   | GEO  | * |
| 473 | EPHB2   | Both | * |
| 474 | EPHB4   | GEO  | * |
| 475 | EPHX2   | Both | * |
| 476 | EPM2A   | GEO  | * |
| 477 | ERAP2   | Both | * |
| 478 | ERBB2   | Both | * |
| 479 | EREG    | GEO  | * |
| 480 | ESM1    | GEO  | * |
| 481 | ESYT1   | GEO  | * |
| 482 | ETFDH   | GEO  | * |
| 483 | ETHE1   | GEO  | * |
| 484 | ETS2    | GEO  | * |
| 485 | ETV1    | GEO  | * |
| 486 | ETV4    | GEO  | * |
| 487 | EVII    | GEO  | * |
| 488 | EVI2B   | GEO  | * |
| 489 | EXOSC2  | GEO  | * |
| 490 | EXTL2   | GEO  | * |
| 491 | EZH2    | GEO  | * |
| 492 | EZR     | GEO  | * |
| 493 | F12     | GEO  | * |
| 494 | F13A1   | Both | * |
| 495 | FABP1   | GEO  | * |
| 496 | FABP3   | GEO  | * |
| 497 | FABP4   | GEO  | * |
| 498 | FABP5   | GEO  | * |

|     |          |      |   |
|-----|----------|------|---|
| 499 | FABP6    | GEO  | * |
| 500 | FADS1    | GEO  | * |
| 501 | FAM101B  | GEO  | * |
| 502 | FAM105B  | GEO  | * |
| 503 | FAM107A  | GEO  | * |
| 504 | FAM117A  | GEO  | * |
| 505 | FAM117B  | GEO  | * |
| 506 | FAM122B  | GEO  | * |
| 507 | FAM126A  | GEO  | * |
| 508 | FAM129B  | GEO  | * |
| 509 | FAM134C  | GEO  | * |
| 510 | FAM135A  | Both | * |
| 511 | FAM136A  | GEO  | * |
| 512 | FAM149A  | GEO  | * |
| 513 | FAM150A  | GEO  | * |
| 514 | FAM160B1 | GEO  | * |
| 515 | FAM164A  | GEO  | * |
| 516 | FAM165B  | GEO  | * |
| 517 | FAM171B  | GEO  | * |
| 518 | FAM188B  | GEO  | * |
| 519 | FAM20C   | GEO  | * |
| 520 | FAM36A   | GEO  | * |
| 521 | FAM46C   | GEO  | * |
| 522 | FAM47E   | GEO  | * |
| 523 | FAM55D   | GEO  | * |
| 524 | FAM82A1  | GEO  | * |
| 525 | FAM92A1  | GEO  | * |
| 526 | FAM96A   | GEO  | * |
| 527 | FANCE    | GEO  | * |
| 528 | FAP      | GEO  | * |
| 529 | FASTKD1  | GEO  | * |
| 530 | FAT1     | GEO  | * |
| 531 | FBLN1    | GEO  | * |
| 532 | FBP1     | GEO  | * |
| 533 | FBXO28   | GEO  | * |
| 534 | FBXO7    | GEO  | * |
| 535 | FBXO9    | GEO  | * |
| 536 | FCGBP    | GEO  | * |
| 537 | FCHO1    | GEO  | * |
| 538 | FECH     | GEO  | * |
| 539 | FEN1     | GEO  | * |
| 540 | FERMT1   | GEO  | * |
| 541 | FERMT2   | GEO  | * |
| 542 | FEV      | GEO  | * |
| 543 | FGD1     | GEO  | * |
| 544 | FGD5     | GEO  | * |
| 545 | FGF20    | GEO  | * |
| 546 | FGFR2    | GEO  | * |
| 547 | FGL2     | GEO  | * |
| 548 | FHL1     | GEO  | * |

|     |              |      |   |
|-----|--------------|------|---|
| 549 | FIBP         | GEO  | * |
| 550 | FKBP10       | GEO  | * |
| 551 | FKBP1B       | GEO  | * |
| 552 | FLJ21511     | GEO  | * |
| 553 | FLJ32063     | GEO  | * |
| 554 | FLJ32255     | GEO  | * |
| 555 | FLJ36848     | GEO  | * |
| 556 | FLJ39051     | GEO  | * |
| 557 | FLJ44606     | GEO  | * |
| 558 | FLJ45248     | GEO  | * |
| 559 | FLVCR2       | GEO  | * |
| 560 | FN1          | GEO  | * |
| 561 | FNBP1        | GEO  | * |
| 562 | FNIP2        | GEO  | * |
| 563 | FOXA1        | GEO  | * |
| 564 | FOXA2        | GEO  | * |
| 565 | FOXF1        | GEO  | * |
| 566 | FOXF2        | GEO  | * |
| 567 | FOXM1        | GEO  | * |
| 568 | FOXO1        | GEO  | * |
| 569 | FOXP1        | GEO  | * |
| 570 | FOXQ1        | GEO  | * |
| 571 | FRMD4B       | GEO  | * |
| 572 | FRMD6        | GEO  | * |
| 573 | FRZB         | Both | * |
| 574 | FSCN1        | GEO  | * |
| 575 | FTH1         | GEO  | * |
| 576 | FTSJ1        | GEO  | * |
| 577 | FUT1         | GEO  | * |
| 578 | FUT8         | GEO  | * |
| 579 | FXYD1        | GEO  | * |
| 580 | FXYD3        | GEO  | * |
| 581 | FXYD5        | GEO  | * |
| 582 | FXYD6        | GEO  | * |
| 583 | FZD2         | GEO  | * |
| 584 | FZD5         | GEO  | * |
| 585 | FZD9         | GEO  | * |
| 586 | G6PC3        | GEO  | * |
| 587 | G6PD         | GEO  | * |
| 588 | GAB1         | GEO  | * |
| 589 | GABBR1       | GEO  | * |
| 590 | GADD45B      | GEO  | * |
| 591 | GALNAC4S-6ST | GEO  | * |
| 592 | GALNT12      | Both | * |
| 593 | GALNT6       | GEO  | * |
| 594 | GALNTL4      | GEO  | * |
| 595 | GAMT         | GEO  | * |
| 596 | GANAB        | GEO  | * |
| 597 | GART         | Both | * |
| 598 | GAS2         | GEO  | * |

|     |        |      |   |
|-----|--------|------|---|
| 599 | GAS6   | GEO  | * |
| 600 | GAS7   | Both | * |
| 601 | GBP3   | GEO  | * |
| 602 | GCG    | GEO  | * |
| 603 | GCNT2  | GEO  | * |
| 604 | GCNT3  | GEO  | * |
| 605 | GCSH   | GEO  | * |
| 606 | GDF15  | GEO  | * |
| 607 | GDPD2  | GEO  | * |
| 608 | GDPD5  | GEO  | * |
| 609 | GEM    | GEO  | * |
| 610 | GFRA2  | GEO  | * |
| 611 | GGT1   | GEO  | * |
| 612 | GGTA1  | GEO  | * |
| 613 | GIMAP1 | GEO  | * |
| 614 | GIMAP6 | GEO  | * |
| 615 | GINS1  | GEO  | * |
| 616 | GPC2   | GEO  | * |
| 617 | GJA3   | GEO  | * |
| 618 | GLB1L2 | GEO  | * |
| 619 | GLIS2  | GEO  | * |
| 620 | GLO1   | GEO  | * |
| 621 | GLP2R  | Both | * |
| 622 | GLS    | GEO  | * |
| 623 | GLS2   | GEO  | * |
| 624 | GLTP   | GEO  | * |
| 625 | GMCL1  | GEO  | * |
| 626 | GMDS   | GEO  | * |
| 627 | GMPS   | GEO  | * |
| 628 | GNA11  | GEO  | * |
| 629 | GNAS   | Both | * |
| 630 | GNAZ   | GEO  | * |
| 631 | GNB4   | Both | * |
| 632 | GNG10  | GEO  | * |
| 633 | GNG2   | GEO  | * |
| 634 | GNG4   | GEO  | * |
| 635 | GNG7   | GEO  | * |
| 636 | GNPDA1 | GEO  | * |
| 637 | GNS    | GEO  | * |
| 638 | GOLM1  | GEO  | * |
| 639 | GOLT1A | GEO  | * |
| 640 | GPA33  | GEO  | * |
| 641 | GPC1   | GEO  | * |
| 642 | GPC6   | GEO  | * |
| 643 | GPCPD1 | GEO  | * |
| 644 | GPD1L  | GEO  | * |
| 645 | GPFR   | GEO  | * |
| 646 | GPM6B  | GEO  | * |
| 647 | GPN3   | GEO  | * |
| 648 | GPNMB  | GEO  | * |

|     |           |      |   |
|-----|-----------|------|---|
| 649 | GPR115    | GEO  | * |
| 650 | GPR137B   | GEO  | * |
| 651 | GPR160    | GEO  | * |
| 652 | GPR176    | GEO  | * |
| 653 | GPR56     | GEO  | * |
| 654 | GPRC5A    | GEO  | * |
| 655 | GPRIN1    | GEO  | * |
| 656 | GPT       | GEO  | * |
| 657 | GPX2      | Both | * |
| 658 | GPX3      | Both | * |
| 659 | GRAMD1A   | GEO  | * |
| 660 | GRAMD1B   | GEO  | * |
| 661 | GRAMD3    | GEO  | * |
| 662 | GRB10     | GEO  | * |
| 663 | GREM2     | GEO  | * |
| 664 | GRHL1     | GEO  | * |
| 665 | GRIN2B    | GEO  | * |
| 666 | GRK5      | GEO  | * |
| 667 | GRPEL1    | GEO  | * |
| 668 | GRPEL2    | GEO  | * |
| 669 | GRTPI     | GEO  | * |
| 670 | GSK3A     | GEO  | * |
| 671 | GSN       | GEO  | * |
| 672 | GTF2IRD1  | GEO  | * |
| 673 | GTF3A     | GEO  | * |
| 674 | GTPBP2    | GEO  | * |
| 675 | GUCA2A    | GEO  | * |
| 676 | GUCA2B    | GEO  | * |
| 677 | GZMA      | GEO  | * |
| 678 | GZMB      | GEO  | * |
| 679 | H2AFJ     | GEO  | * |
| 680 | H2AFY2    | GEO  | * |
| 681 | HABP2     | GEO  | * |
| 682 | HAPLN1    | GEO  | * |
| 683 | HAPLN3    | GEO  | * |
| 684 | HBS1L     | GEO  | * |
| 685 | HCN1      | GEO  | * |
| 686 | HDAC9     | Both | * |
| 687 | HEPACAM2  | GEO  | * |
| 688 | HEXIM1    | GEO  | * |
| 689 | HGD       | GEO  | * |
| 690 | HHLA2     | GEO  | * |
| 691 | HIAT1     | GEO  | * |
| 692 | HIG2      | GEO  | * |
| 693 | HIGD1A    | GEO  | * |
| 694 | HIPK2     | GEO  | * |
| 695 | HIST1H2BG | GEO  | * |
| 696 | HKDC1     | GEO  | * |
| 697 | HLA-DMA   | GEO  | * |
| 698 | HLA-DRB1  | Both | * |

|     |         |      |   |
|-----|---------|------|---|
| 699 | HLTF    | GEO  | * |
| 700 | HMG20B  | GEO  | * |
| 701 | HMGA1   | GEO  | * |
| 702 | HMGA2   | GEO  | * |
| 703 | HMG4    | GEO  | * |
| 704 | HNF1B   | GEO  | * |
| 705 | HNF4A   | Both | * |
| 706 | HNF4G   | GEO  | * |
| 707 | HNMT    | Both | * |
| 708 | HNRNPA0 | GEO  | * |
| 709 | HNRNPH1 | GEO  | * |
| 710 | HOXA13  | GEO  | * |
| 711 | HOXA5   | GEO  | * |
| 712 | HP      | Both | * |
| 713 | HPCAL4  | GEO  | * |
| 714 | HPGD    | Both | * |
| 715 | HPS3    | GEO  | * |
| 716 | HRASLS2 | GEO  | * |
| 717 | HS6ST2  | GEO  | * |
| 718 | HSBP1   | GEO  | * |
| 719 | HSD11B2 | GEO  | * |
| 720 | HSD17B2 | Both | * |
| 721 | HSDL2   | GEO  | * |
| 722 | HSPA12A | GEO  | * |
| 723 | HSPA13  | GEO  | * |
| 724 | HSPA2   | Both | * |
| 725 | HSPB1   | GEO  | * |
| 726 | HSPH1   | GEO  | * |
| 727 | HTR4    | GEO  | * |
| 728 | ICOS    | GEO  | * |
| 729 | ID2     | GEO  | * |
| 730 | IFIT1   | GEO  | * |
| 731 | IFITM1  | GEO  | * |
| 732 | IFITM2  | GEO  | * |
| 733 | IFITM3  | Both | * |
| 734 | IFRD1   | GEO  | * |
| 735 | IGF1    | Both | * |
| 736 | IGFBP3  | Both | * |
| 737 | IGHA1   | GEO  | * |
| 738 | IGHG1   | Both | * |
| 739 | IGJ     | GEO  | * |
| 740 | IL15    | GEO  | * |
| 741 | IL1R2   | GEO  | * |
| 742 | IL24    | GEO  | * |
| 743 | IL27RA  | GEO  | * |
| 744 | IL6R    | GEO  | * |
| 745 | IL8     | Both | * |
| 746 | ILDR1   | GEO  | * |
| 747 | INHBA   | Both | * |
| 748 | INSIG2  | GEO  | * |

|     |           |      |   |
|-----|-----------|------|---|
| 749 | INTS5     | GEO  | * |
| 750 | IPO5      | GEO  | * |
| 751 | IPO8      | GEO  | * |
| 752 | IRAK2     | GEO  | * |
| 753 | IRF4      | GEO  | * |
| 754 | ISG20     | GEO  | * |
| 755 | ITGA11    | GEO  | * |
| 756 | ITGA5     | GEO  | * |
| 757 | ITGA6     | GEO  | * |
| 758 | ITGAE     | GEO  | * |
| 759 | ITGAV     | GEO  | * |
| 760 | ITGB6     | GEO  | * |
| 761 | ITGB8     | GEO  | * |
| 762 | ITIH2     | GEO  | * |
| 763 | ITIH5     | GEO  | * |
| 764 | ITLN1     | Both | * |
| 765 | ITM2C     | GEO  | * |
| 766 | ITPR1     | GEO  | * |
| 767 | ITPRIPL2  | GEO  | * |
| 768 | JAG2      | GEO  | * |
| 769 | JAM3      | GEO  | * |
| 770 | JAZF1     | GEO  | * |
| 771 | JMJD6     | GEO  | * |
| 772 | JUB       | GEO  | * |
| 773 | KAL1      | GEO  | * |
| 774 | KANK2     | GEO  | * |
| 775 | KANK4     | GEO  | * |
| 776 | KATNB1    | GEO  | * |
| 777 | KCMF1     | GEO  | * |
| 778 | KCND3     | GEO  | * |
| 779 | KCNE3     | GEO  | * |
| 780 | KCNH2     | GEO  | * |
| 781 | KCTD12    | GEO  | * |
| 782 | KCTD14    | GEO  | * |
| 783 | KDELC1    | GEO  | * |
| 784 | KIAA0040  | GEO  | * |
| 785 | KIAA0828  | GEO  | * |
| 786 | KIAA1199  | GEO  | * |
| 787 | KIAA1217  | GEO  | * |
| 788 | KIAA1244  | GEO  | * |
| 789 | KIAA1257  | GEO  | * |
| 790 | KIAA1324  | GEO  | * |
| 791 | KIAA1324L | GEO  | * |
| 792 | KIAA1370  | GEO  | * |
| 793 | KIAA1468  | GEO  | * |
| 794 | KIAA1549  | GEO  | * |
| 795 | KIF13B    | GEO  | * |
| 796 | KIF1B     | GEO  | * |
| 797 | KIF20A    | GEO  | * |
| 798 | KIF2C     | GEO  | * |

|     |              |      |   |
|-----|--------------|------|---|
| 799 | KIF5B        | GEO  | * |
| 800 | KLC2         | GEO  | * |
| 801 | KLC3         | GEO  | * |
| 802 | KLF4         | GEO  | * |
| 803 | KLF6         | GEO  | * |
| 804 | KLF9         | GEO  | * |
| 805 | KLHL11       | GEO  | * |
| 806 | KLHL29       | GEO  | * |
| 807 | KLK10        | GEO  | * |
| 808 | KPNB1        | GEO  | * |
| 809 | KREMEN1      | GEO  | * |
| 810 | KRT20        | GEO  | * |
| 811 | KRT23        | GEO  | * |
| 812 | KRT24        | GEO  | * |
| 813 | KRT6B        | GEO  | * |
| 814 | KRT80        | GEO  | * |
| 815 | KRT86        | Both | * |
| 816 | L3MBTL3      | GEO  | * |
| 817 | LACTB        | GEO  | * |
| 818 | LAMB1        | Both | * |
| 819 | LAMB3        | GEO  | * |
| 820 | LAMC2        | GEO  | * |
| 821 | LAPTM5       | GEO  | * |
| 822 | LASS2        | GEO  | * |
| 823 | LDHB         | GEO  | * |
| 824 | LDHD         | GEO  | * |
| 825 | LDLRAD3      | GEO  | * |
| 826 | LEF1         | GEO  | * |
| 827 | LEMD1        | GEO  | * |
| 828 | LEPRE1       | GEO  | * |
| 829 | LEPROTL1     | GEO  | * |
| 830 | LGALS2       | GEO  | * |
| 831 | LGALS4       | GEO  | * |
| 832 | LGR5         | GEO  | * |
| 833 | LIFR         | GEO  | * |
| 834 | LIMCH1       | GEO  | * |
| 835 | LIPE         | GEO  | * |
| 836 | LIPG         | GEO  | * |
| 837 | LITAF        | GEO  | * |
| 838 | LMNB1        | GEO  | * |
| 839 | LMO2         | GEO  | * |
| 840 | LMO6         | GEO  | * |
| 841 | LNX1         | GEO  | * |
| 842 | LOC100127983 | GEO  | * |
| 843 | LOC100132288 | GEO  | * |
| 844 | LOC100133036 | GEO  | * |
| 845 | LOC100287411 | GEO  | * |
| 846 | LOC100288413 | GEO  | * |
| 847 | LOC100289019 | GEO  | * |
| 848 | LOC100289410 | GEO  | * |

|     |              |     |   |
|-----|--------------|-----|---|
| 849 | LOC100506621 | GEO | * |
| 850 | LOC221710    | GEO | * |
| 851 | LOC339290    | GEO | * |
| 852 | LOC344887    | GEO | * |
| 853 | LOC388796    | GEO | * |
| 854 | LOC399959    | GEO | * |
| 855 | LOC400573    | GEO | * |
| 856 | LOC442198    | GEO | * |
| 857 | LOC643837    | GEO | * |
| 858 | LOC654433    | GEO | * |
| 859 | LOH11CR2A    | GEO | * |
| 860 | LOX          | GEO | * |
| 861 | LOXL2        | GEO | * |
| 862 | LOXL4        | GEO | * |
| 863 | LPAR1        | GEO | * |
| 864 | LPAR5        | GEO | * |
| 865 | LPCAT1       | GEO | * |
| 866 | LPHN3        | GEO | * |
| 867 | LPPR4        | GEO | * |
| 868 | LPXN         | GEO | * |
| 869 | LRG1         | GEO | * |
| 870 | LRIG1        | GEO | * |
| 871 | LRP4         | GEO | * |
| 872 | LRP8         | GEO | * |
| 873 | LRRC19       | GEO | * |
| 874 | LRRC34       | GEO | * |
| 875 | LRRC8A       | GEO | * |
| 876 | LRRN2        | GEO | * |
| 877 | LTBP2        | GEO | * |
| 878 | LUZP6        | GEO | * |
| 879 | LXN          | GEO | * |
| 880 | LY6G6D       | GEO | * |
| 881 | LY75         | GEO | * |
| 882 | LYZ          | GEO | * |
| 883 | M6PR         | GEO | * |
| 884 | MAB21L2      | GEO | * |
| 885 | MACC1        | GEO | * |
| 886 | MAEA         | GEO | * |
| 887 | MAF          | GEO | * |
| 888 | MAK16        | GEO | * |
| 889 | MALL         | GEO | * |
| 890 | MAMDC2       | GEO | * |
| 891 | MAML2        | GEO | * |
| 892 | MAML3        | GEO | * |
| 893 | MAN1A1       | GEO | * |
| 894 | MAN2A1       | GEO | * |
| 895 | MAOA         | GEO | * |
| 896 | MAOB         | GEO | * |
| 897 | MAP1B        | GEO | * |
| 898 | MAP1LC3B     | GEO | * |



|     |          |      |   |
|-----|----------|------|---|
| 899 | MAP2K6   | GEO  | * |
| 900 | MAP3K1   | Both | * |
| 901 | MAP3K8   | GEO  | * |
| 902 | MAP4K4   | GEO  | * |
| 903 | MAP7D3   | GEO  | * |
| 904 | MAPK1    | GEO  | * |
| 905 | MAPK10   | GEO  | * |
| 906 | MAPK12   | GEO  | * |
| 907 | MAPKAP1  | GEO  | * |
| 908 | MAPKSP1  | GEO  | * |
| 909 | MAPRE1   | GEO  | * |
| 910 | MARVELD2 | GEO  | * |
| 911 | MASTL    | GEO  | * |
| 912 | MAT2B    | GEO  | * |
| 913 | MATN2    | GEO  | * |
| 914 | MCC      | GEO  | * |
| 915 | MCF2L    | GEO  | * |
| 916 | MED13L   | GEO  | * |
| 917 | MED14    | GEO  | * |
| 918 | MED20    | GEO  | * |
| 919 | MEF2C    | GEO  | * |
| 920 | MEIS1    | GEO  | * |
| 921 | MEN1     | GEO  | * |
| 922 | MEP1A    | Both | * |
| 923 | MEST     | GEO  | * |
| 924 | MET      | GEO  | * |
| 925 | METTL7A  | GEO  | * |
| 926 | MFAP2    | GEO  | * |
| 927 | MFAP3L   | GEO  | * |
| 928 | MGAT4A   | GEO  | * |
| 929 | MGC13057 | GEO  | * |
| 930 | MGC14376 | GEO  | * |
| 931 | MGC39372 | GEO  | * |
| 932 | MGC4172  | GEO  | * |
| 933 | MGLL     | GEO  | * |
| 934 | MICAL2   | GEO  | * |
| 935 | MICB     | Both | * |
| 936 | MID1     | GEO  | * |
| 937 | MLF2     | GEO  | * |
| 938 | MLLT3    | GEO  | * |
| 939 | MMP1     | Both | * |
| 940 | MMP11    | GEO  | * |
| 941 | MMP12    | Both | * |
| 942 | MMP14    | GEO  | * |
| 943 | MMP28    | GEO  | * |
| 944 | MMP3     | Both | * |
| 945 | MMP7     | Both | * |
| 946 | MOBK12B  | GEO  | * |
| 947 | MOCS1    | GEO  | * |
| 948 | MORC4    | GEO  | * |

|     |         |      |   |
|-----|---------|------|---|
| 949 | MORN4   | GEO  | * |
| 950 | MPEG1   | GEO  | * |
| 951 | MPPE1   | GEO  | * |
| 952 | MPZL2   | GEO  | * |
| 953 | MRC1    | Both | * |
| 954 | MRPL37  | GEO  | * |
| 955 | MRPS2   | GEO  | * |
| 956 | MRS2    | GEO  | * |
| 957 | MS4A12  | GEO  | * |
| 958 | MS4A7   | GEO  | * |
| 959 | MSLN    | GEO  | * |
| 960 | MSX2    | GEO  | * |
| 961 | MT1E    | GEO  | * |
| 962 | MT1F    | GEO  | * |
| 963 | MT1H    | GEO  | * |
| 964 | MT1M    | GEO  | * |
| 965 | MT1X    | GEO  | * |
| 966 | MT2A    | GEO  | * |
| 967 | MTHFD1L | GEO  | * |
| 968 | MTHFD2  | GEO  | * |
| 969 | MTM1    | Both | * |
| 970 | MUC13   | GEO  | * |
| 971 | MUC16   | GEO  | * |
| 972 | MUM1L1  | GEO  | * |
| 973 | MUSK    | GEO  | * |
| 974 | MXD1    | GEO  | * |
| 975 | MXRA5   | GEO  | * |
| 976 | MXRA7   | GEO  | * |
| 977 | MYC     | Both | * |
| 978 | MYH11   | GEO  | * |
| 979 | MYH7B   | GEO  | * |
| 980 | MYL9    | GEO  | * |
| 981 | MYLIP   | GEO  | * |
| 982 | MYLK    | GEO  | * |
| 983 | MYO1A   | GEO  | * |
| 984 | MYO5A   | GEO  | * |
| 985 | MYO6    | GEO  | * |
| 986 | MYOM1   | GEO  | * |
| 987 | MYOT    | GEO  | * |
| 988 | NAA30   | GEO  | * |
| 989 | NAAA    | GEO  | * |
| 990 | NAB2    | GEO  | * |
| 991 | NAMPT   | GEO  | * |
| 992 | NANP    | GEO  | * |
| 993 | NAP1L1  | GEO  | * |
| 994 | NAP1L2  | GEO  | * |
| 995 | NAT10   | GEO  | * |
| 996 | NAV1    | GEO  | * |
| 997 | NBEA    | GEO  | * |
| 998 | NCAM1   | GEO  | * |

|      |            |      |   |
|------|------------|------|---|
| 999  | NCRNA00094 | GEO  | * |
| 1000 | NCRNA00118 | GEO  | * |
| 1001 | NCRNA00173 | GEO  | * |
| 1002 | NDN        | GEO  | * |
| 1003 | NDRG2      | GEO  | * |
| 1004 | NEBL       | GEO  | * |
| 1005 | NECAP1     | GEO  | * |
| 1006 | NEDD4L     | GEO  | * |
| 1007 | NEDD9      | GEO  | * |
| 1008 | NEGR1      | GEO  | * |
| 1009 | NEK2       | GEO  | * |
| 1010 | NEK5       | GEO  | * |
| 1011 | NET1       | GEO  | * |
| 1012 | NEU3       | GEO  | * |
| 1013 | NEUROD1    | GEO  | * |
| 1014 | NFAT5      | GEO  | * |
| 1015 | NFE2L3     | GEO  | * |
| 1016 | NFIA       | GEO  | * |
| 1017 | NFIB       | GEO  | * |
| 1018 | NIN        | GEO  | * |
| 1019 | NISCH      | GEO  | * |
| 1020 | NKD1       | GEO  | * |
| 1021 | NKD2       | GEO  | * |
| 1022 | NKX3-1     | GEO  | * |
| 1023 | NLRP2      | Both | * |
| 1024 | NMD3       | GEO  | * |
| 1025 | NMT1       | GEO  | * |
| 1026 | NNMT       | GEO  | * |
| 1027 | NOC3L      | GEO  | * |
| 1028 | NOC4L      | GEO  | * |
| 1029 | NOD2       | Both | * |
| 1030 | NONO       | GEO  | * |
| 1031 | NOP14      | GEO  | * |
| 1032 | NOP56      | GEO  | * |
| 1033 | NOSTRIN    | GEO  | * |
| 1034 | NOV        | GEO  | * |
| 1035 | NPM2       | GEO  | * |
| 1036 | NPNT       | GEO  | * |
| 1037 | NR2F2      | Both | * |
| 1038 | NR3C1      | Both | * |
| 1039 | NR3C2      | GEO  | * |
| 1040 | NR4A2      | GEO  | * |
| 1041 | NR5A2      | GEO  | * |
| 1042 | NRP1       | GEO  | * |
| 1043 | NSUN5      | GEO  | * |
| 1044 | NT5C3      | GEO  | * |
| 1045 | NT5C3L     | GEO  | * |
| 1046 | NUCB2      | GEO  | * |
| 1047 | NUDT11     | GEO  | * |
| 1048 | NUMBL      | GEO  | * |

|      |          |     |   |
|------|----------|-----|---|
| 1049 | NUP88    | GEO | * |
| 1050 | NUP98    | GEO | * |
| 1051 | NXT2     | GEO | * |
| 1052 | ODAM     | GEO | * |
| 1053 | ODF2     | GEO | * |
| 1054 | OGFOD1   | GEO | * |
| 1055 | OGFRL1   | GEO | * |
| 1056 | OLFML1   | GEO | * |
| 1057 | OLFML2A  | GEO | * |
| 1058 | OLFML2B  | GEO | * |
| 1059 | OSBPL10  | GEO | * |
| 1060 | OSBPL1A  | GEO | * |
| 1061 | OSBPL2   | GEO | * |
| 1062 | OSBPL3   | GEO | * |
| 1063 | OSBPL6   | GEO | * |
| 1064 | OSBPL7   | GEO | * |
| 1065 | OSTbeta  | GEO | * |
| 1066 | OTUD1    | GEO | * |
| 1067 | P4HA3    | GEO | * |
| 1068 | PA2G4    | GEO | * |
| 1069 | PADI2    | GEO | * |
| 1070 | PAFAH1B2 | GEO | * |
| 1071 | PAG1     | GEO | * |
| 1072 | PAH      | GEO | * |
| 1073 | PAM      | GEO | * |
| 1074 | PAPPA    | GEO | * |
| 1075 | PAPSS2   | GEO | * |
| 1076 | PAQR5    | GEO | * |
| 1077 | PAQR8    | GEO | * |
| 1078 | PAX6     | GEO | * |
| 1079 | PBK      | GEO | * |
| 1080 | PBLD     | GEO | * |
| 1081 | PBX3     | GEO | * |
| 1082 | PC       | GEO | * |
| 1083 | PCK1     | GEO | * |
| 1084 | PCLO     | GEO | * |
| 1085 | PCOLCE2  | GEO | * |
| 1086 | PCSK6    | GEO | * |
| 1087 | PDCD4    | GEO | * |
| 1088 | PDCD6    | GEO | * |
| 1089 | PDE10A   | GEO | * |
| 1090 | PDE2A    | GEO | * |
| 1091 | PDE4D    | GEO | * |
| 1092 | PDE9A    | GEO | * |
| 1093 | PDGFRA   | GEO | * |
| 1094 | PDGFRL   | GEO | * |
| 1095 | PDIA6    | GEO | * |
| 1096 | PDK4     | GEO | * |
| 1097 | PDLIM3   | GEO | * |
| 1098 | PDPN     | GEO | * |

|      |          |      |   |
|------|----------|------|---|
| 1099 | PDS5B    | GEO  | * |
| 1100 | PDXK     | GEO  | * |
| 1101 | PDZD2    | GEO  | * |
| 1102 | PECI     | GEO  | * |
| 1103 | PEG10    | GEO  | * |
| 1104 | PELI1    | GEO  | * |
| 1105 | PELI2    | GEO  | * |
| 1106 | PERLD1   | GEO  | * |
| 1107 | PERP     | GEO  | * |
| 1108 | PFKFB2   | GEO  | * |
| 1109 | PGM5     | GEO  | * |
| 1110 | PHF16    | GEO  | * |
| 1111 | PHF19    | GEO  | * |
| 1112 | PHF20    | GEO  | * |
| 1113 | PHLDA1   | GEO  | * |
| 1114 | PHLDB2   | GEO  | * |
| 1115 | PHLPP2   | GEO  | * |
| 1116 | PIAS2    | GEO  | * |
| 1117 | PIGR     | GEO  | * |
| 1118 | PIGW     | GEO  | * |
| 1119 | PIK3AP1  | GEO  | * |
| 1120 | PIK3CD   | GEO  | * |
| 1121 | PIK3R1   | Both | * |
| 1122 | PITX1    | GEO  | * |
| 1123 | PJA1     | GEO  | * |
| 1124 | PKIB     | GEO  | * |
| 1125 | PKN3     | GEO  | * |
| 1126 | PLA2G10  | GEO  | * |
| 1127 | PLA2G12A | GEO  | * |
| 1128 | PLA2G16  | GEO  | * |
| 1129 | PLA2G4A  | GEO  | * |
| 1130 | PLAC8    | GEO  | * |
| 1131 | PLAC9    | GEO  | * |
| 1132 | PLAGL1   | GEO  | * |
| 1133 | PLAU     | Both | * |
| 1134 | PLAUR    | GEO  | * |
| 1135 | PLCD3    | GEO  | * |
| 1136 | PLCE1    | GEO  | * |
| 1137 | PLCL2    | GEO  | * |
| 1138 | PLD1     | GEO  | * |
| 1139 | PLEKHA3  | GEO  | * |
| 1140 | PLEKHB2  | GEO  | * |
| 1141 | PLEKHF2  | GEO  | * |
| 1142 | PLEKHG6  | GEO  | * |
| 1143 | PLG      | GEO  | * |
| 1144 | PLOD2    | GEO  | * |
| 1145 | PLP1     | GEO  | * |
| 1146 | PLS1     | GEO  | * |
| 1147 | PMAIP1   | GEO  | * |
| 1148 | PMEPA1   | GEO  | * |

|      |          |      |   |
|------|----------|------|---|
| 1149 | PNKD     | GEO  | * |
| 1150 | POF1B    | GEO  | * |
| 1151 | POLD2    | GEO  | * |
| 1152 | POLD4    | GEO  | * |
| 1153 | POLDIP2  | GEO  | * |
| 1154 | POSTN    | GEO  | * |
| 1155 | PPAP2A   | GEO  | * |
| 1156 | PPARGC1B | GEO  | * |
| 1157 | PPAT     | GEO  | * |
| 1158 | PPEF1    | GEO  | * |
| 1159 | PPFIBP2  | GEO  | * |
| 1160 | PPID     | GEO  | * |
| 1161 | PPL      | GEO  | * |
| 1162 | PPM1H    | GEO  | * |
| 1163 | PPM1K    | GEO  | * |
| 1164 | PPP1CC   | GEO  | * |
| 1165 | PPP1R14C | GEO  | * |
| 1166 | PPP1R16B | GEO  | * |
| 1167 | PPP1R2   | GEO  | * |
| 1168 | PPP2CA   | GEO  | * |
| 1169 | PPP2R1B  | GEO  | * |
| 1170 | PPP2R2C  | GEO  | * |
| 1171 | PPP2R3A  | GEO  | * |
| 1172 | PQLC3    | GEO  | * |
| 1173 | PRC1     | GEO  | * |
| 1174 | PRDX6    | GEO  | * |
| 1175 | PREB     | GEO  | * |
| 1176 | PRELID2  | GEO  | * |
| 1177 | PREP     | GEO  | * |
| 1178 | PRICKLE1 | GEO  | * |
| 1179 | PRIM2    | GEO  | * |
| 1180 | PRKACB   | GEO  | * |
| 1181 | PRKAR2B  | GEO  | * |
| 1182 | PRKCH    | GEO  | * |
| 1183 | PRMT5    | GEO  | * |
| 1184 | PROX1    | GEO  | * |
| 1185 | PRPH     | GEO  | * |
| 1186 | PRSS22   | GEO  | * |
| 1187 | PRSS23   | GEO  | * |
| 1188 | PRSS3    | GEO  | * |
| 1189 | PSAT1    | GEO  | * |
| 1190 | PSIP1    | GEO  | * |
| 1191 | PSMF1    | GEO  | * |
| 1192 | PSTPIP2  | GEO  | * |
| 1193 | PTGDR    | GEO  | * |
| 1194 | PTGER2   | Both | * |
| 1195 | PTGER3   | GEO  | * |
| 1196 | PTGES    | Both | * |
| 1197 | PTGIS    | Both | * |
| 1198 | PTP4A1   | GEO  | * |

|      |           |      |   |
|------|-----------|------|---|
| 1199 | PTP4A3    | GEO  | * |
| 1200 | PTPLA     | GEO  | * |
| 1201 | PTPRB     | GEO  | * |
| 1202 | PTPRG     | GEO  | * |
| 1203 | PTPRH     | GEO  | * |
| 1204 | PTPRR     | GEO  | * |
| 1205 | PTRF      | Both | * |
| 1206 | PTRH1     | GEO  | * |
| 1207 | PURB      | GEO  | * |
| 1208 | PUS7      | GEO  | * |
| 1209 | PWP2      | GEO  | * |
| 1210 | PYCARD    | GEO  | * |
| 1211 | PYGL      | GEO  | * |
| 1212 | PYY       | GEO  | * |
| 1213 | PYY2      | GEO  | * |
| 1214 | QPCT      | GEO  | * |
| 1215 | QSOX1     | GEO  | * |
| 1216 | RAB11FIP4 | GEO  | * |
| 1217 | RAB25     | GEO  | * |
| 1218 | RAB27B    | GEO  | * |
| 1219 | RAB34     | GEO  | * |
| 1220 | RAB37     | GEO  | * |
| 1221 | RAB3IP    | GEO  | * |
| 1222 | RAB8B     | GEO  | * |
| 1223 | RABGAP1   | GEO  | * |
| 1224 | RAE1      | GEO  | * |
| 1225 | RAN       | GEO  | * |
| 1226 | RANBP9    | GEO  | * |
| 1227 | RAP2C     | GEO  | * |
| 1228 | RAPH1     | GEO  | * |
| 1229 | RARRES1   | GEO  | * |
| 1230 | RARRES2   | Both | * |
| 1231 | RASA1     | GEO  | * |
| 1232 | RASAL1    | GEO  | * |
| 1233 | RASEF     | GEO  | * |
| 1234 | RASGRP3   | GEO  | * |
| 1235 | RASSF4    | GEO  | * |
| 1236 | RASSF6    | GEO  | * |
| 1237 | RAVER2    | GEO  | * |
| 1238 | RBL2      | GEO  | * |
| 1239 | RBM18     | GEO  | * |
| 1240 | RBM24     | GEO  | * |
| 1241 | RBMS2     | GEO  | * |
| 1242 | RBMS3     | GEO  | * |
| 1243 | RCAN1     | GEO  | * |
| 1244 | RCAN2     | GEO  | * |
| 1245 | RCAN3     | GEO  | * |
| 1246 | RCC2      | GEO  | * |
| 1247 | RCOR2     | GEO  | * |
| 1248 | RDH5      | GEO  | * |

|      |          |      |   |
|------|----------|------|---|
| 1249 | RDX      | GEO  | * |
| 1250 | RECQL    | Both | * |
| 1251 | RELB     | GEO  | * |
| 1252 | RELL1    | GEO  | * |
| 1253 | REPS2    | GEO  | * |
| 1254 | RETSAT   | GEO  | * |
| 1255 | REXO2    | GEO  | * |
| 1256 | RFC3     | GEO  | * |
| 1257 | RFFL     | GEO  | * |
| 1258 | RGL1     | GEO  | * |
| 1259 | RGMA     | GEO  | * |
| 1260 | RGNEF    | GEO  | * |
| 1261 | RGS10    | GEO  | * |
| 1262 | RGS12    | GEO  | * |
| 1263 | RGS2     | GEO  | * |
| 1264 | RGS9     | GEO  | * |
| 1265 | RHBDF1   | GEO  | * |
| 1266 | RHEBL1   | GEO  | * |
| 1267 | RHOF     | GEO  | * |
| 1268 | RHOT1    | GEO  | * |
| 1269 | RHOU     | GEO  | * |
| 1270 | RIBC2    | GEO  | * |
| 1271 | RICS     | GEO  | * |
| 1272 | RIN2     | GEO  | * |
| 1273 | RIN3     | GEO  | * |
| 1274 | RIOK3    | GEO  | * |
| 1275 | RIPK2    | GEO  | * |
| 1276 | RMND5A   | GEO  | * |
| 1277 | RNF130   | GEO  | * |
| 1278 | RNF138   | GEO  | * |
| 1279 | RNF144A  | GEO  | * |
| 1280 | RNF152   | GEO  | * |
| 1281 | RNF19B   | GEO  | * |
| 1282 | RNF219   | GEO  | * |
| 1283 | RNF32    | GEO  | * |
| 1284 | RNF43    | GEO  | * |
| 1285 | RNH1     | GEO  | * |
| 1286 | RPN2     | GEO  | * |
| 1287 | RPRD1A   | GEO  | * |
| 1288 | RPS19BP1 | GEO  | * |
| 1289 | RPS6KA2  | Both | * |
| 1290 | RPUSD4   | GEO  | * |
| 1291 | RRAGD    | GEO  | * |
| 1292 | RSL1D1   | GEO  | * |
| 1293 | RSPRY1   | GEO  | * |
| 1294 | RTEL1    | GEO  | * |
| 1295 | RUNDC3B  | GEO  | * |
| 1296 | RUNX1T1  | GEO  | * |
| 1297 | RUNX2    | GEO  | * |
| 1298 | RUNX3    | Both | * |

|      |          |      |   |
|------|----------|------|---|
| 1299 | RUVBL1   | GEO  | * |
| 1300 | RUVBL2   | GEO  | * |
| 1301 | S100A11  | GEO  | * |
| 1302 | S100A2   | GEO  | * |
| 1303 | S100P    | GEO  | * |
| 1304 | SAP130   | GEO  | * |
| 1305 | SAP30L   | GEO  | * |
| 1306 | SATB1    | GEO  | * |
| 1307 | SCARA5   | GEO  | * |
| 1308 | SCD      | GEO  | * |
| 1309 | SCG2     | GEO  | * |
| 1310 | SCGN     | GEO  | * |
| 1311 | SCIN     | GEO  | * |
| 1312 | SCN9A    | GEO  | * |
| 1313 | SCNN1B   | GEO  | * |
| 1314 | SCRIB    | GEO  | * |
| 1315 | SDC3     | GEO  | * |
| 1316 | SDCBP2   | GEO  | * |
| 1317 | SDCCAG1  | GEO  | * |
| 1318 | SDPR     | GEO  | * |
| 1319 | SE57-1   | GEO  | * |
| 1320 | SEC14L2  | GEO  | * |
| 1321 | SEH1L    | GEO  | * |
| 1322 | SELENBP1 | GEO  | * |
| 1323 | SEMA4D   | GEO  | * |
| 1324 | SEMA4G   | GEO  | * |
| 1325 | SEMA6A   | GEO  | * |
| 1326 | SEMA6D   | GEO  | * |
| 1327 | SEPP1    | Both | * |
| 1328 | SEPT8    | GEO  | * |
| 1329 | SERPINB1 | GEO  | * |
| 1330 | SERPINB5 | GEO  | * |
| 1331 | SERPINB9 | GEO  | * |
| 1332 | SERPINH1 | GEO  | * |
| 1333 | SERTAD4  | GEO  | * |
| 1334 | SET      | GEO  | * |
| 1335 | SETBP1   | GEO  | * |
| 1336 | SF3A1    | GEO  | * |
| 1337 | SF3B3    | GEO  | * |
| 1338 | SFRP1    | GEO  | * |
| 1339 | SFRS18   | GEO  | * |
| 1340 | SFXN5    | GEO  | * |
| 1341 | SGCE     | GEO  | * |
| 1342 | SGIP1    | GEO  | * |
| 1343 | SGK1     | GEO  | * |
| 1344 | SGK2     | GEO  | * |
| 1345 | SGK493   | GEO  | * |
| 1346 | SGMS2    | GEO  | * |
| 1347 | SGSM1    | GEO  | * |
| 1348 | SH3D19   | GEO  | * |

|      |          |      |   |
|------|----------|------|---|
| 1349 | SH3TC2   | GEO  | * |
| 1350 | SHANK2   | GEO  | * |
| 1351 | SHMT2    | GEO  | * |
| 1352 | SIGLEC1  | GEO  | * |
| 1353 | SIGLEC6  | GEO  | * |
| 1354 | SIM2     | GEO  | * |
| 1355 | SIPA1L1  | GEO  | * |
| 1356 | SIX4     | GEO  | * |
| 1357 | SLC12A2  | GEO  | * |
| 1358 | SLC12A7  | GEO  | * |
| 1359 | SLC16A9  | GEO  | * |
| 1360 | SLC1A1   | GEO  | * |
| 1361 | SLC1A7   | GEO  | * |
| 1362 | SLC20A1  | GEO  | * |
| 1363 | SLC22A3  | GEO  | * |
| 1364 | SLC22A4  | Both | * |
| 1365 | SLC25A15 | GEO  | * |
| 1366 | SLC25A23 | GEO  | * |
| 1367 | SLC25A24 | GEO  | * |
| 1368 | SLC25A34 | GEO  | * |
| 1369 | SLC25A37 | GEO  | * |
| 1370 | SLC25A39 | GEO  | * |
| 1371 | SLC26A11 | GEO  | * |
| 1372 | SLC26A2  | GEO  | * |
| 1373 | SLC26A3  | Both | * |
| 1374 | SLC26A6  | GEO  | * |
| 1375 | SLC27A2  | GEO  | * |
| 1376 | SLC2A1   | GEO  | * |
| 1377 | SLC2A13  | GEO  | * |
| 1378 | SLC2A4   | GEO  | * |
| 1379 | SLC30A10 | GEO  | * |
| 1380 | SLC30A4  | GEO  | * |
| 1381 | SLC35A3  | GEO  | * |
| 1382 | SLC35B4  | GEO  | * |
| 1383 | SLC37A1  | GEO  | * |
| 1384 | SLC38A1  | GEO  | * |
| 1385 | SLC38A5  | GEO  | * |
| 1386 | SLC39A10 | GEO  | * |
| 1387 | SLC39A6  | GEO  | * |
| 1388 | SLC3A2   | GEO  | * |
| 1389 | SLC40A1  | GEO  | * |
| 1390 | SLC41A1  | GEO  | * |
| 1391 | SLC44A1  | GEO  | * |
| 1392 | SLC46A3  | GEO  | * |
| 1393 | SLC4A11  | GEO  | * |
| 1394 | SLC4A4   | GEO  | * |
| 1395 | SLC4A8   | GEO  | * |
| 1396 | SLC6A20  | GEO  | * |
| 1397 | SLC6A6   | GEO  | * |
| 1398 | SLC7A2   | GEO  | * |

|      |            |      |   |
|------|------------|------|---|
| 1399 | SLC7A5     | GEO  | * |
| 1400 | SLC9A2     | GEO  | * |
| 1401 | SLC9A7     | GEO  | * |
| 1402 | SLC9A9     | GEO  | * |
| 1403 | SLCO4A1    | GEO  | * |
| 1404 | SLIT2      | GEO  | * |
| 1405 | SMA4       | GEO  | * |
| 1406 | SMAD2      | Both | * |
| 1407 | SMAD4      | Both | * |
| 1408 | SMAD6      | GEO  | * |
| 1409 | SMARCA1    | GEO  | * |
| 1410 | SMPDL3A    | GEO  | * |
| 1411 | SMTN       | GEO  | * |
| 1412 | SMYD5      | GEO  | * |
| 1413 | SNAI1      | GEO  | * |
| 1414 | SNAI2      | GEO  | * |
| 1415 | SNAP25     | GEO  | * |
| 1416 | SNRNP48    | GEO  | * |
| 1417 | SNTB1      | GEO  | * |
| 1418 | SNX12      | GEO  | * |
| 1419 | SORD       | GEO  | * |
| 1420 | SOX4       | GEO  | * |
| 1421 | SOX9       | GEO  | * |
| 1422 | SP3        | GEO  | * |
| 1423 | SP5        | GEO  | * |
| 1424 | SPAG1      | GEO  | * |
| 1425 | SPAG16     | GEO  | * |
| 1426 | SPARC      | GEO  | * |
| 1427 | SPARCL1    | GEO  | * |
| 1428 | SPIB       | GEO  | * |
| 1429 | SPINK4     | GEO  | * |
| 1430 | SPIRE1     | GEO  | * |
| 1431 | SPNS2      | GEO  | * |
| 1432 | SPP1       | GEO  | * |
| 1433 | SPPL2A     | GEO  | * |
| 1434 | SQRDL      | GEO  | * |
| 1435 | SRI        | GEO  | * |
| 1436 | SRPR       | GEO  | * |
| 1437 | SRPX       | GEO  | * |
| 1438 | SRPX2      | GEO  | * |
| 1439 | SRSF6      | GEO  | * |
| 1440 | SSBP2      | GEO  | * |
| 1441 | SSPN       | GEO  | * |
| 1442 | SSR1       | GEO  | * |
| 1443 | SSRP1      | GEO  | * |
| 1444 | SST        | GEO  | * |
| 1445 | ST6GALNAC1 | GEO  | * |
| 1446 | ST6GALNAC2 | GEO  | * |
| 1447 | STAB1      | GEO  | * |
| 1448 | STAMBPL1   | GEO  | * |

|      |         |      |   |
|------|---------|------|---|
| 1449 | STAP2   | GEO  | * |
| 1450 | STAU1   | GEO  | * |
| 1451 | STC1    | GEO  | * |
| 1452 | STC2    | GEO  | * |
| 1453 | STK24   | GEO  | * |
| 1454 | STMN2   | GEO  | * |
| 1455 | STMN3   | GEO  | * |
| 1456 | STON2   | GEO  | * |
| 1457 | STOX2   | GEO  | * |
| 1458 | STRADB  | GEO  | * |
| 1459 | STT3A   | GEO  | * |
| 1460 | STX3    | GEO  | * |
| 1461 | STXBP1  | GEO  | * |
| 1462 | STXBP4  | GEO  | * |
| 1463 | STXBP6  | GEO  | * |
| 1464 | STYK1   | GEO  | * |
| 1465 | STYX    | GEO  | * |
| 1466 | SULF1   | GEO  | * |
| 1467 | SULT1A1 | Both | * |
| 1468 | SULT1A2 | Both | * |
| 1469 | SULT2B1 | GEO  | * |
| 1470 | SUSD1   | GEO  | * |
| 1471 | SVIL    | GEO  | * |
| 1472 | SYK     | GEO  | * |
| 1473 | SYNC    | GEO  | * |
| 1474 | SYNCRIP | GEO  | * |
| 1475 | SYNE2   | GEO  | * |
| 1476 | SYNGAP1 | GEO  | * |
| 1477 | SYNGR3  | GEO  | * |
| 1478 | SYNPO   | GEO  | * |
| 1479 | SYT17   | GEO  | * |
| 1480 | SYTL2   | GEO  | * |
| 1481 | TACSTD2 | GEO  | * |
| 1482 | TAGLN2  | GEO  | * |
| 1483 | TAPBP   | GEO  | * |
| 1484 | TBX20   | GEO  | * |
| 1485 | TC2N    | GEO  | * |
| 1486 | TCEA2   | GEO  | * |
| 1487 | TCEA3   | GEO  | * |
| 1488 | TCF21   | GEO  | * |
| 1489 | TCF4    | GEO  | * |
| 1490 | TCF7    | Both | * |
| 1491 | TCN1    | GEO  | * |
| 1492 | TCOF1   | GEO  | * |
| 1493 | TEAD3   | GEO  | * |
| 1494 | TEAD4   | GEO  | * |
| 1495 | TERF2   | GEO  | * |
| 1496 | TERT    | GEO  | * |
| 1497 | TESC    | GEO  | * |
| 1498 | TEX10   | GEO  | * |

|      |           |      |   |
|------|-----------|------|---|
| 1499 | TFAP4     | GEO  | * |
| 1500 | TFCP2L1   | GEO  | * |
| 1501 | TGFB1     | Both | * |
| 1502 | TGFBI     | GEO  | * |
| 1503 | TGFBR1    | Both | * |
| 1504 | TGFBR2    | Both | * |
| 1505 | TGIF1     | GEO  | * |
| 1506 | TGIF2     | GEO  | * |
| 1507 | THBS2     | GEO  | * |
| 1508 | TIAM1     | GEO  | * |
| 1509 | TIMM17A   | GEO  | * |
| 1510 | TIMP1     | Both | * |
| 1511 | TIMP2     | Both | * |
| 1512 | TIMP3     | GEO  | * |
| 1513 | TKT       | GEO  | * |
| 1514 | TLE1      | Both | * |
| 1515 | TM4SF1    | GEO  | * |
| 1516 | TM7SF3    | GEO  | * |
| 1517 | TMC7      | GEO  | * |
| 1518 | TMCC3     | GEO  | * |
| 1519 | TMEFF1    | GEO  | * |
| 1520 | TMEM125   | GEO  | * |
| 1521 | TMEM127   | GEO  | * |
| 1522 | TMEM133   | GEO  | * |
| 1523 | TMEM139   | GEO  | * |
| 1524 | TMEM158   | GEO  | * |
| 1525 | TMEM167A  | GEO  | * |
| 1526 | TMEM171   | GEO  | * |
| 1527 | TMEM182   | GEO  | * |
| 1528 | TMEM185B  | GEO  | * |
| 1529 | TMEM222   | GEO  | * |
| 1530 | TMEM30A   | GEO  | * |
| 1531 | TMEM39B   | GEO  | * |
| 1532 | TMEM41B   | GEO  | * |
| 1533 | TMEM43    | GEO  | * |
| 1534 | TMEM54    | GEO  | * |
| 1535 | TMEM63A   | GEO  | * |
| 1536 | TMEM98    | GEO  | * |
| 1537 | TMEM99    | GEO  | * |
| 1538 | TMPRSS13  | GEO  | * |
| 1539 | TMPRSS2   | GEO  | * |
| 1540 | TMPRSS3   | GEO  | * |
| 1541 | TMTC2     | GEO  | * |
| 1542 | TNFRSF10B | Both | * |
| 1543 | TNFRSF11B | GEO  | * |
| 1544 | TNFRSF12A | GEO  | * |
| 1545 | TNFRSF21  | GEO  | * |
| 1546 | TNFSF10   | GEO  | * |
| 1547 | TNFSF11   | GEO  | * |
| 1548 | TNFSF9    | GEO  | * |

|      |          |      |   |
|------|----------|------|---|
| 1549 | TNRC6C   | GEO  | * |
| 1550 | TNS1     | GEO  | * |
| 1551 | TNXA     | GEO  | * |
| 1552 | TOMM22   | GEO  | * |
| 1553 | TOMM34   | GEO  | * |
| 1554 | TOP1MT   | GEO  | * |
| 1555 | TOX3     | GEO  | * |
| 1556 | TP53I3   | GEO  | * |
| 1557 | TP53INP2 | GEO  | * |
| 1558 | TPD52L2  | GEO  | * |
| 1559 | TPH1     | GEO  | * |
| 1560 | TPSG1    | GEO  | * |
| 1561 | TPX2     | GEO  | * |
| 1562 | TRAF3IP3 | GEO  | * |
| 1563 | TRAPPC4  | GEO  | * |
| 1564 | TRIB3    | GEO  | * |
| 1565 | TRIM22   | GEO  | * |
| 1566 | TRIM23   | GEO  | * |
| 1567 | TRIM28   | GEO  | * |
| 1568 | TRIM8    | GEO  | * |
| 1569 | TRIP13   | GEO  | * |
| 1570 | TRMT11   | GEO  | * |
| 1571 | TRPC1    | GEO  | * |
| 1572 | TRPM6    | GEO  | * |
| 1573 | TRPS1    | GEO  | * |
| 1574 | TSC22D1  | GEO  | * |
| 1575 | TSHZ1    | GEO  | * |
| 1576 | TSPAN1   | GEO  | * |
| 1577 | TSPAN5   | GEO  | * |
| 1578 | TSPAN6   | GEO  | * |
| 1579 | TSPAN7   | GEO  | * |
| 1580 | TSPYL2   | GEO  | * |
| 1581 | TST      | GEO  | * |
| 1582 | TTC22    | GEO  | * |
| 1583 | TTC26    | GEO  | * |
| 1584 | TTL      | GEO  | * |
| 1585 | TLL6     | GEO  | * |
| 1586 | TLL7     | GEO  | * |
| 1587 | TUBAL3   | GEO  | * |
| 1588 | TUBB3    | GEO  | * |
| 1589 | TUBB6    | GEO  | * |
| 1590 | TUSC1    | GEO  | * |
| 1591 | TWSG1    | GEO  | * |
| 1592 | TXNDC5   | GEO  | * |
| 1593 | TXNDC9   | GEO  | * |
| 1594 | TXNIP    | GEO  | * |
| 1595 | TYMS     | Both | * |
| 1596 | U2AF1    | GEO  | * |
| 1597 | UBASH3B  | GEO  | * |
| 1598 | UBE2E2   | GEO  | * |

|      |         |      |   |
|------|---------|------|---|
| 1599 | UBE2H   | GEO  | * |
| 1600 | UBFD1   | GEO  | * |
| 1601 | UBQLN1  | GEO  | * |
| 1602 | UBR7    | GEO  | * |
| 1603 | UBXN8   | GEO  | * |
| 1604 | UFSP2   | GEO  | * |
| 1605 | UGDH    | GEO  | * |
| 1606 | UGGT1   | GEO  | * |
| 1607 | UGP2    | GEO  | * |
| 1608 | UGT1A1  | Both | * |
| 1609 | UGT1A8  | Both | * |
| 1610 | UGT2B15 | Both | * |
| 1611 | UGT2B17 | GEO  | * |
| 1612 | UNC119B | GEO  | * |
| 1613 | UNC5C   | GEO  | * |
| 1614 | UPP1    | GEO  | * |
| 1615 | USP2    | GEO  | * |
| 1616 | USP38   | GEO  | * |
| 1617 | USP5    | GEO  | * |
| 1618 | VAR5    | GEO  | * |
| 1619 | VAT1L   | GEO  | * |
| 1620 | VCAM1   | GEO  | * |
| 1621 | VDAC3   | GEO  | * |
| 1622 | VILL    | GEO  | * |
| 1623 | VIP     | GEO  | * |
| 1624 | VIPR1   | GEO  | * |
| 1625 | VPS41   | GEO  | * |
| 1626 | VPS4A   | GEO  | * |
| 1627 | VSIG2   | GEO  | * |
| 1628 | VSNL1   | GEO  | * |
| 1629 | VWA2    | GEO  | * |
| 1630 | VWA5A   | GEO  | * |
| 1631 | VWF     | GEO  | * |
| 1632 | WASF1   | GEO  | * |
| 1633 | WASF2   | GEO  | * |
| 1634 | WBP5    | GEO  | * |
| 1635 | WDFY1   | GEO  | * |
| 1636 | WDR66   | GEO  | * |
| 1637 | WDR74   | GEO  | * |
| 1638 | WNT2    | GEO  | * |
| 1639 | WSB2    | GEO  | * |
| 1640 | WWTR1   | GEO  | * |
| 1641 | XBP1    | GEO  | * |
| 1642 | XKR4    | GEO  | * |
| 1643 | XPO5    | GEO  | * |
| 1644 | XPOT    | GEO  | * |
| 1645 | XRCC4   | Both | * |
| 1646 | YARS    | GEO  | * |
| 1647 | YRDC    | GEO  | * |
| 1648 | ZC3H12C | GEO  | * |

|      |         |      |   |
|------|---------|------|---|
| 1649 | ZCCHC24 | GEO  | * |
| 1650 | ZDHC2   | GEO  | * |
| 1651 | ZEB1    | GEO  | * |
| 1652 | ZEB2    | GEO  | * |
| 1653 | ZFP36L2 | GEO  | * |
| 1654 | ZFPM2   | GEO  | * |
| 1655 | ZFYVE26 | GEO  | * |
| 1656 | ZFYVE28 | GEO  | * |
| 1657 | ZG16    | GEO  | * |
| 1658 | ZMAT3   | GEO  | * |
| 1659 | ZMIZ1   | Both | * |
| 1660 | ZNF134  | GEO  | * |
| 1661 | ZNF148  | GEO  | * |
| 1662 | ZNF217  | GEO  | * |
| 1663 | ZNF280C | GEO  | * |
| 1664 | ZNF282  | GEO  | * |
| 1665 | ZNF302  | GEO  | * |
| 1666 | ZNF304  | GEO  | * |
| 1667 | ZNF311  | GEO  | * |
| 1668 | ZNF350  | GEO  | * |
| 1669 | ZNF385A | GEO  | * |
| 1670 | ZNF426  | GEO  | * |
| 1671 | ZNF467  | GEO  | * |
| 1672 | ZNF473  | GEO  | * |
| 1673 | ZNF502  | GEO  | * |
| 1674 | ZNF512B | GEO  | * |
| 1675 | ZNF526  | GEO  | * |
| 1676 | ZNF542  | GEO  | * |
| 1677 | ZNF575  | GEO  | * |
| 1678 | ZNF586  | GEO  | * |
| 1679 | ZNF592  | GEO  | * |
| 1680 | ZNF630  | GEO  | * |
| 1681 | ZNF702P | GEO  | * |
| 1682 | ZNF74   | GEO  | * |
| 1683 | ZNF75A  | GEO  | * |
| 1684 | ZNF846  | GEO  | * |
| 1685 | ZNRF3   | GEO  | * |
| 1686 | ZRANB1  | GEO  | * |
| 1687 | ZW10    | GEO  | * |
| 1688 | ZYG11B  | GEO  | * |
| 1689 | ZZEF1   | GEO  | * |
| 1690 | A1CF    | GEO  |   |
| 1691 | A2LD1   | GEO  |   |
| 1692 | A2M     | GEO  |   |
| 1693 | A4GALT  | GEO  |   |
| 1694 | A4GNT   | GEO  |   |
| 1695 | AAA1    | GEO  |   |
| 1696 | AAAS    | GEO  |   |
| 1697 | AADACL1 | GEO  |   |
| 1698 | AAK1    | GEO  |   |



|      |         |      |  |
|------|---------|------|--|
| 1699 | AASS    | GEO  |  |
| 1700 | ABAT    | GEO  |  |
| 1701 | ABCA1   | GEO  |  |
| 1702 | ABCA13  | GEO  |  |
| 1703 | ABCB11  | GEO  |  |
| 1704 | ABCB4   | GEO  |  |
| 1705 | ABCB6   | GEO  |  |
| 1706 | ABCC1   | Both |  |
| 1707 | ABCC13  | GEO  |  |
| 1708 | ABCC4   | Both |  |
| 1709 | ABCC5   | GEO  |  |
| 1710 | ABCC6   | GEO  |  |
| 1711 | ABCC8   | GEO  |  |
| 1712 | ABCD1   | GEO  |  |
| 1713 | ABCE1   | GEO  |  |
| 1714 | ABCF1   | GEO  |  |
| 1715 | ABHD10  | GEO  |  |
| 1716 | ABHD11  | GEO  |  |
| 1717 | ABHD12  | GEO  |  |
| 1718 | ABHD12B | GEO  |  |
| 1719 | ABHD15  | GEO  |  |
| 1720 | ABHD6   | GEO  |  |
| 1721 | ABHD7   | GEO  |  |
| 1722 | ABHD8   | GEO  |  |
| 1723 | ABI2    | GEO  |  |
| 1724 | ABL1    | GEO  |  |
| 1725 | ABLIM1  | Both |  |
| 1726 | ABLIM2  | GEO  |  |
| 1727 | ABLIM3  | GEO  |  |
| 1728 | ABO     | GAD  |  |
| 1729 | ABTB2   | GEO  |  |
| 1730 | ACAA1   | GEO  |  |
| 1731 | ACAA2   | GEO  |  |
| 1732 | ACACB   | GEO  |  |
| 1733 | ACAD9   | GEO  |  |
| 1734 | ACADM   | GEO  |  |
| 1735 | ACADVL  | GEO  |  |
| 1736 | ACAT1   | GEO  |  |
| 1737 | ACBD3   | GEO  |  |
| 1738 | ACBD7   | GEO  |  |
| 1739 | ACE     | GAD  |  |
| 1740 | ACE2    | GEO  |  |
| 1741 | ACER2   | GEO  |  |
| 1742 | ACHE    | GEO  |  |
| 1743 | ACLY    | GEO  |  |
| 1744 | ACO2    | GEO  |  |
| 1745 | ACOT1   | GEO  |  |
| 1746 | ACOT11  | GEO  |  |
| 1747 | ACOT4   | GEO  |  |
| 1748 | ACOT7   | GEO  |  |

|      |          |     |  |
|------|----------|-----|--|
| 1749 | ACOT9    | GEO |  |
| 1750 | ACOX1    | GEO |  |
| 1751 | ACOX3    | GEO |  |
| 1752 | ACP1     | GAD |  |
| 1753 | ACP5     | GEO |  |
| 1754 | ACRBP    | GEO |  |
| 1755 | ACRV1    | GEO |  |
| 1756 | ACSF2    | GEO |  |
| 1757 | ACSL1    | GEO |  |
| 1758 | ACSL3    | GEO |  |
| 1759 | ACSM3    | GEO |  |
| 1760 | ACSS2    | GEO |  |
| 1761 | ACTA2    | GEO |  |
| 1762 | ACTB     | GEO |  |
| 1763 | ACTR3B   | GEO |  |
| 1764 | ACVR1B   | GEO |  |
| 1765 | ACVR2A   | GAD |  |
| 1766 | ACVRL1   | GEO |  |
| 1767 | ACY1     | GEO |  |
| 1768 | ADAD1    | GAD |  |
| 1769 | ADAM10   | GEO |  |
| 1770 | ADAM17   | GAD |  |
| 1771 | ADAM22   | GEO |  |
| 1772 | ADAM23   | GEO |  |
| 1773 | ADAM28   | GEO |  |
| 1774 | ADAM32   | GEO |  |
| 1775 | ADAMTS10 | GEO |  |
| 1776 | ADAMTS17 | GEO |  |
| 1777 | ADAMTS3  | GEO |  |
| 1778 | ADAMTS4  | GEO |  |
| 1779 | ADAMTS5  | GEO |  |
| 1780 | ADAMTS7  | GEO |  |
| 1781 | ADAMTS8  | GEO |  |
| 1782 | ADAMTS9  | GEO |  |
| 1783 | ADAMTSL1 | GEO |  |
| 1784 | ADAMTSL2 | GEO |  |
| 1785 | ADAMTSL3 | GEO |  |
| 1786 | ADAMTSL5 | GEO |  |
| 1787 | ADAP1    | GEO |  |
| 1788 | ADAR     | GAD |  |
| 1789 | ADARB1   | GEO |  |
| 1790 | ADCK2    | GEO |  |
| 1791 | ADCK4    | GEO |  |
| 1792 | ADCY2    | GEO |  |
| 1793 | ADCY5    | GEO |  |
| 1794 | ADCY6    | GEO |  |
| 1795 | ADCY9    | GEO |  |
| 1796 | ADCYAP1  | GEO |  |
| 1797 | ADD1     | GEO |  |
| 1798 | ADFP     | GEO |  |

|      |          |      |  |
|------|----------|------|--|
| 1799 | ADH4     | GEO  |  |
| 1800 | ADH5     | GEO  |  |
| 1801 | ADH6     | GEO  |  |
| 1802 | ADIPOQ   | Both |  |
| 1803 | ADIPOR1  | GAD  |  |
| 1804 | ADM      | GEO  |  |
| 1805 | ADORA1   | GEO  |  |
| 1806 | ADORA2A  | GEO  |  |
| 1807 | ADPGK    | GEO  |  |
| 1808 | ADPRH    | GEO  |  |
| 1809 | ADRA2C   | GEO  |  |
| 1810 | ADRB1    | GEO  |  |
| 1811 | ADRB2    | Both |  |
| 1812 | ADRB3    | GAD  |  |
| 1813 | ADRBK1   | GEO  |  |
| 1814 | ADRBK2   | GEO  |  |
| 1815 | ADSV     | GEO  |  |
| 1816 | AEBP1    | GEO  |  |
| 1817 | AES      | GEO  |  |
| 1818 | AFAP1-AS | GEO  |  |
| 1819 | AFAP1L1  | GEO  |  |
| 1820 | AFF1     | GEO  |  |
| 1821 | AFF2     | GEO  |  |
| 1822 | AFF3     | GEO  |  |
| 1823 | AFG3L1P  | GEO  |  |
| 1824 | AGA      | GEO  |  |
| 1825 | AGAP11   | GEO  |  |
| 1826 | AGFG1    | GEO  |  |
| 1827 | AGFG2    | GEO  |  |
| 1828 | AGGF1    | GEO  |  |
| 1829 | AGK      | GEO  |  |
| 1830 | AGMAT    | GEO  |  |
| 1831 | AGPAT3   | GEO  |  |
| 1832 | AGPAT4   | GEO  |  |
| 1833 | AGPAT5   | GEO  |  |
| 1834 | AGPAT7   | GEO  |  |
| 1835 | AGPHD1   | GEO  |  |
| 1836 | AGRN     | GEO  |  |
| 1837 | AGT      | Both |  |
| 1838 | AGTR1    | Both |  |
| 1839 | AGTR2    | GEO  |  |
| 1840 | AGXT     | Both |  |
| 1841 | AGXT2    | GEO  |  |
| 1842 | AGXT2L2  | GEO  |  |
| 1843 | AHRR     | GEO  |  |
| 1844 | AHSA1    | GEO  |  |
| 1845 | AHSG     | GEO  |  |
| 1846 | AIF1     | GEO  |  |
| 1847 | AIFM3    | GEO  |  |
| 1848 | AIG1     | GEO  |  |

|      |         |      |  |
|------|---------|------|--|
| 1849 | AIM1L   | GEO  |  |
| 1850 | AIM2    | GEO  |  |
| 1851 | AIP     | GAD  |  |
| 1852 | AIPL1   | GEO  |  |
| 1853 | AK3     | GEO  |  |
| 1854 | AK4     | GEO  |  |
| 1855 | AKAP1   | GEO  |  |
| 1856 | AKAP10  | Both |  |
| 1857 | AKAP11  | GEO  |  |
| 1858 | AKAP12  | GEO  |  |
| 1859 | AKAP13  | GEO  |  |
| 1860 | AKAP7   | GEO  |  |
| 1861 | AKAP8L  | GEO  |  |
| 1862 | AKAP9   | Both |  |
| 1863 | AKR1B1  | GEO  |  |
| 1864 | AKR1C2  | GEO  |  |
| 1865 | AKR1C4  | GEO  |  |
| 1866 | AKR1CL2 | GEO  |  |
| 1867 | AKR7A3  | GEO  |  |
| 1868 | AKT1    | GAD  |  |
| 1869 | AKT1S1  | GEO  |  |
| 1870 | ALAS1   | GEO  |  |
| 1871 | ALB     | GEO  |  |
| 1872 | ALCAM   | GEO  |  |
| 1873 | ALDH1A2 | GEO  |  |
| 1874 | ALDH1A3 | GEO  |  |
| 1875 | ALDH1B1 | GEO  |  |
| 1876 | ALDH1L1 | GAD  |  |
| 1877 | ALDH2   | GAD  |  |
| 1878 | ALDH3A1 | GEO  |  |
| 1879 | ALDH4A1 | GEO  |  |
| 1880 | ALDH5A1 | GEO  |  |
| 1881 | ALDH6A1 | GEO  |  |
| 1882 | ALDH7A1 | GEO  |  |
| 1883 | ALDOB   | GEO  |  |
| 1884 | ALDOC   | GEO  |  |
| 1885 | ALG11   | GEO  |  |
| 1886 | ALG2    | GEO  |  |
| 1887 | ALG5    | GEO  |  |
| 1888 | ALOX12  | GAD  |  |
| 1889 | ALOX5AP | GEO  |  |
| 1890 | ALPI    | GEO  |  |
| 1891 | ALPK3   | GEO  |  |
| 1892 | ALPPL2  | GEO  |  |
| 1893 | ALS2CR4 | GEO  |  |
| 1894 | AMBP    | GEO  |  |
| 1895 | AMBRA1  | GEO  |  |
| 1896 | AMD1    | GAD  |  |
| 1897 | AMIGO3  | GAD  |  |
| 1898 | AMMECR1 | GEO  |  |

|      |              |      |  |
|------|--------------|------|--|
| 1899 | AMOTL2       | GEO  |  |
| 1900 | AMPD1        | Both |  |
| 1901 | AMT          | Both |  |
| 1902 | AMY2B        | GEO  |  |
| 1903 | AMZ2         | GEO  |  |
| 1904 | ANAPC13      | GAD  |  |
| 1905 | ANAPC4       | GEO  |  |
| 1906 | ANG          | GEO  |  |
| 1907 | ANGPT1       | GEO  |  |
| 1908 | ANGPTL4      | GEO  |  |
| 1909 | ANK1         | GEO  |  |
| 1910 | ANKFN1       | GEO  |  |
| 1911 | ANKHD1       | GEO  |  |
| 1912 | ANKHD1-EIF4E | GEO  |  |
| 1913 | ANKLE2       | GEO  |  |
| 1914 | ANKMY2       | GEO  |  |
| 1915 | ANKRD10      | GEO  |  |
| 1916 | ANKRD11      | GEO  |  |
| 1917 | ANKRD13A     | GEO  |  |
| 1918 | ANKRD16      | GEO  |  |
| 1919 | ANKRD18A     | GEO  |  |
| 1920 | ANKRD20A2    | GEO  |  |
| 1921 | ANKRD20B     | GEO  |  |
| 1922 | ANKRD26      | GEO  |  |
| 1923 | ANKRD28      | GEO  |  |
| 1924 | ANKRD36      | GEO  |  |
| 1925 | ANKRD36B     | GEO  |  |
| 1926 | ANKRD37      | GEO  |  |
| 1927 | ANKRD42      | GEO  |  |
| 1928 | ANKRD43      | GEO  |  |
| 1929 | ANKRD5       | GEO  |  |
| 1930 | ANKRD53      | GEO  |  |
| 1931 | ANKRD56      | GEO  |  |
| 1932 | ANKRD57      | GEO  |  |
| 1933 | ANLN         | GEO  |  |
| 1934 | ANO10        | GEO  |  |
| 1935 | ANO3         | GEO  |  |
| 1936 | ANO4         | GEO  |  |
| 1937 | ANO8         | GEO  |  |
| 1938 | ANP32A       | GEO  |  |
| 1939 | ANTXR2       | GEO  |  |
| 1940 | ANXA1        | GEO  |  |
| 1941 | ANXA10       | GEO  |  |
| 1942 | ANXA11       | GEO  |  |
| 1943 | ANXA13       | GEO  |  |
| 1944 | ANXA2P1      | GEO  |  |
| 1945 | ANXA2P2      | GEO  |  |
| 1946 | ANXA6        | GEO  |  |
| 1947 | AOC2         | GEO  |  |
| 1948 | AOC3         | GEO  |  |

|      |          |      |  |
|------|----------|------|--|
| 1949 | AOX1     | GAD  |  |
| 1950 | AP1G1    | GEO  |  |
| 1951 | AP1S2    | GEO  |  |
| 1952 | AP1S3    | GEO  |  |
| 1953 | AP2B1    | GEO  |  |
| 1954 | AP3B2    | GEO  |  |
| 1955 | AP3D1    | GEO  |  |
| 1956 | AP3S1    | GEO  |  |
| 1957 | AP4B1    | GEO  |  |
| 1958 | AP4S1    | GEO  |  |
| 1959 | APBA3    | GEO  |  |
| 1960 | APBB1IP  | GEO  |  |
| 1961 | APC      | Both |  |
| 1962 | APCDD1   | GEO  |  |
| 1963 | APCS     | GEO  |  |
| 1964 | APEG1    | GEO  |  |
| 1965 | APEH     | GAD  |  |
| 1966 | APEX1    | GAD  |  |
| 1967 | APG4B    | GEO  |  |
| 1968 | APH1B    | GEO  |  |
| 1969 | APIP     | GEO  |  |
| 1970 | APLF     | GEO  |  |
| 1971 | APLN     | GEO  |  |
| 1972 | APLP2    | GEO  |  |
| 1973 | APOA1    | Both |  |
| 1974 | APOA2    | GEO  |  |
| 1975 | APOB     | Both |  |
| 1976 | APOB48R  | GEO  |  |
| 1977 | APOBEC1  | GEO  |  |
| 1978 | APOBEC3C | GEO  |  |
| 1979 | APOBEC3F | GEO  |  |
| 1980 | APOBEC3G | GEO  |  |
| 1981 | APOC1    | GEO  |  |
| 1982 | APOC2    | GEO  |  |
| 1983 | APOC3    | Both |  |
| 1984 | APOL1    | GEO  |  |
| 1985 | APOL2    | GEO  |  |
| 1986 | APOL3    | GEO  |  |
| 1987 | APOL6    | GEO  |  |
| 1988 | APOLD1   | GEO  |  |
| 1989 | APOM     | GEO  |  |
| 1990 | APOO     | GEO  |  |
| 1991 | APPL2    | GEO  |  |
| 1992 | APRT     | GEO  |  |
| 1993 | AQP3     | GEO  |  |
| 1994 | AQP9     | GEO  |  |
| 1995 | AR       | GAD  |  |
| 1996 | ARAF     | GEO  |  |
| 1997 | ARAP2    | GEO  |  |
| 1998 | ARC      | GEO  |  |

|      |           |     |  |
|------|-----------|-----|--|
| 1999 | AREG      | GEO |  |
| 2000 | ARF1      | GEO |  |
| 2001 | ARF3      | GEO |  |
| 2002 | ARF5      | GEO |  |
| 2003 | ARFGAP2   | GEO |  |
| 2004 | ARFGEF2   | GEO |  |
| 2005 | ARFRP1    | GEO |  |
| 2006 | ARGBP2    | GEO |  |
| 2007 | ARGLU1    | GEO |  |
| 2008 | ARHGAP1   | GEO |  |
| 2009 | ARHGAP12  | GEO |  |
| 2010 | ARHGAP18  | GEO |  |
| 2011 | ARHGAP20  | GEO |  |
| 2012 | ARHGAP22  | GEO |  |
| 2013 | ARHGAP23  | GEO |  |
| 2014 | ARHGAP25  | GEO |  |
| 2015 | ARHGAP26  | GEO |  |
| 2016 | ARHGAP27  | GEO |  |
| 2017 | ARHGAP28  | GEO |  |
| 2018 | ARHGAP29  | GEO |  |
| 2019 | ARHGAP32  | GEO |  |
| 2020 | ARHGAP8   | GEO |  |
| 2021 | ARHGEF10L | GEO |  |
| 2022 | ARHGEF17  | GEO |  |
| 2023 | ARHGEF2   | GEO |  |
| 2024 | ARHGEF26  | GEO |  |
| 2025 | ARHGEF35  | GEO |  |
| 2026 | ARHGEF37  | GEO |  |
| 2027 | ARHGEF4   | GEO |  |
| 2028 | ARHGEF40  | GEO |  |
| 2029 | ARID1A    | GEO |  |
| 2030 | ARID1B    | GEO |  |
| 2031 | ARID3A    | GEO |  |
| 2032 | ARID5B    | GEO |  |
| 2033 | ARIH1     | GEO |  |
| 2034 | ARL11     | GAD |  |
| 2035 | ARL13B    | GEO |  |
| 2036 | ARL2      | GEO |  |
| 2037 | ARL4      | GEO |  |
| 2038 | ARL4A     | GEO |  |
| 2039 | ARL4D     | GEO |  |
| 2040 | ARL5B     | GEO |  |
| 2041 | ARL6      | GEO |  |
| 2042 | ARL8A     | GEO |  |
| 2043 | ARL8B     | GEO |  |
| 2044 | ARMC10    | GEO |  |
| 2045 | ARMC4     | GEO |  |
| 2046 | ARMC7     | GEO |  |
| 2047 | ARMCX2    | GEO |  |
| 2048 | ARMCX3    | GEO |  |

|      |         |      |  |
|------|---------|------|--|
| 2049 | ARMCX4  | GEO  |  |
| 2050 | ARMCX5  | GEO  |  |
| 2051 | ARMS2   | GAD  |  |
| 2052 | ARNT    | GAD  |  |
| 2053 | ARNTL   | GEO  |  |
| 2054 | ARPC1A  | GAD  |  |
| 2055 | ARPC2   | GAD  |  |
| 2056 | ARPC3   | GEO  |  |
| 2057 | ARPC4   | GEO  |  |
| 2058 | ARPC5L  | GEO  |  |
| 2059 | ARPP19  | GEO  |  |
| 2060 | ARRDC4  | GEO  |  |
| 2061 | ARSB    | GEO  |  |
| 2062 | ARSF    | GEO  |  |
| 2063 | ARSG    | GEO  |  |
| 2064 | ARSK    | GEO  |  |
| 2065 | ART3    | GEO  |  |
| 2066 | ARV1    | GEO  |  |
| 2067 | ARVCF   | GEO  |  |
| 2068 | ASAH1   | GEO  |  |
| 2069 | ASAM    | GEO  |  |
| 2070 | ASAP3   | GEO  |  |
| 2071 | ASB4    | GEO  |  |
| 2072 | ASCC3   | Both |  |
| 2073 | ASCL5   | GEO  |  |
| 2074 | ASF1A   | GEO  |  |
| 2075 | ASGR1   | GEO  |  |
| 2076 | ASGR2   | GEO  |  |
| 2077 | ASH1L   | GEO  |  |
| 2078 | ASL     | GEO  |  |
| 2079 | ASMT    | GEO  |  |
| 2080 | ASMTL   | GEO  |  |
| 2081 | ASPHD2  | GEO  |  |
| 2082 | ASPM    | GEO  |  |
| 2083 | ASTN2   | GEO  |  |
| 2084 | ASXL1   | GEO  |  |
| 2085 | ASXL3   | GEO  |  |
| 2086 | ATAD2   | GEO  |  |
| 2087 | ATAD3A  | GEO  |  |
| 2088 | ATAD5   | GEO  |  |
| 2089 | ATF5    | GEO  |  |
| 2090 | ATG10   | GEO  |  |
| 2091 | ATG16L1 | GAD  |  |
| 2092 | ATG2B   | GAD  |  |
| 2093 | ATG4A   | GEO  |  |
| 2094 | ATG4B   | GEO  |  |
| 2095 | ATG5    | GAD  |  |
| 2096 | ATG7    | GEO  |  |
| 2097 | ATG9B   | GAD  |  |
| 2098 | ATIC    | Both |  |

|      |          |      |  |
|------|----------|------|--|
| 2099 | ATM      | Both |  |
| 2100 | ATMIN    | GEO  |  |
| 2101 | ATN1     | GEO  |  |
| 2102 | ATOH1    | GEO  |  |
| 2103 | ATOH8    | GEO  |  |
| 2104 | ATP10A   | GEO  |  |
| 2105 | ATP10B   | GEO  |  |
| 2106 | ATP11A   | GEO  |  |
| 2107 | ATP11B   | GEO  |  |
| 2108 | ATP13A2  | GEO  |  |
| 2109 | ATP13A3  | GEO  |  |
| 2110 | ATP13A4  | GEO  |  |
| 2111 | ATP1A1   | GEO  |  |
| 2112 | ATP1A2   | GEO  |  |
| 2113 | ATP1B2   | GEO  |  |
| 2114 | ATP2A1   | GEO  |  |
| 2115 | ATP2A2   | Both |  |
| 2116 | ATP2A3   | Both |  |
| 2117 | ATP2C1   | GEO  |  |
| 2118 | ATP5C1   | GEO  |  |
| 2119 | ATP5F1   | GEO  |  |
| 2120 | ATP5G2   | GEO  |  |
| 2121 | ATP5J    | GEO  |  |
| 2122 | ATP5O    | GEO  |  |
| 2123 | ATP6     | GAD  |  |
| 2124 | ATP6AP1L | GEO  |  |
| 2125 | ATP6V0A2 | GEO  |  |
| 2126 | ATP6V0A4 | GEO  |  |
| 2127 | ATP6V0B  | GEO  |  |
| 2128 | ATP6V0D1 | GEO  |  |
| 2129 | ATP6V0E1 | GEO  |  |
| 2130 | ATP6V1B1 | GEO  |  |
| 2131 | ATP6V1C1 | GEO  |  |
| 2132 | ATP6V1C2 | GEO  |  |
| 2133 | ATP6V1E1 | GEO  |  |
| 2134 | ATP6V1E2 | GEO  |  |
| 2135 | ATP6V1F  | GEO  |  |
| 2136 | ATP6V1G2 | GEO  |  |
| 2137 | ATP7B    | GEO  |  |
| 2138 | ATP8B1   | GEO  |  |
| 2139 | ATPBD4   | GEO  |  |
| 2140 | ATPIF1   | GEO  |  |
| 2141 | ATR      | Both |  |
| 2142 | ATRIP    | GEO  |  |
| 2143 | ATRX     | GEO  |  |
| 2144 | ATXN1    | GEO  |  |
| 2145 | ATXN2L   | GAD  |  |
| 2146 | AUH      | GEO  |  |
| 2147 | AUTS2    | GEO  |  |
| 2148 | AVEN     | GEO  |  |

|      |          |     |  |
|------|----------|-----|--|
| 2149 | AVIL     | GEO |  |
| 2150 | AVL9     | GEO |  |
| 2151 | AXIN1    | GAD |  |
| 2152 | AZGP1    | GEO |  |
| 2153 | AZIN1    | GEO |  |
| 2154 | B2M      | GEO |  |
| 2155 | B3GALT5  | GEO |  |
| 2156 | B3GNT3   | GEO |  |
| 2157 | B3GNT4   | GEO |  |
| 2158 | B3GNT6   | GEO |  |
| 2159 | B3GNTL1  | GEO |  |
| 2160 | B4GALNT1 | GEO |  |
| 2161 | B4GALNT2 | GEO |  |
| 2162 | B4GALNT4 | GEO |  |
| 2163 | B4GALT1  | GEO |  |
| 2164 | B4GALT2  | GEO |  |
| 2165 | B4GALT5  | GEO |  |
| 2166 | B4GALT6  | GEO |  |
| 2167 | BACH1    | GEO |  |
| 2168 | BACH2    | GAD |  |
| 2169 | BAD      | GEO |  |
| 2170 | BAG3     | GEO |  |
| 2171 | BAG5     | GEO |  |
| 2172 | BAHCC1   | GEO |  |
| 2173 | BAIAP2   | GEO |  |
| 2174 | BAIAP2L2 | GEO |  |
| 2175 | BAMBI    | GAD |  |
| 2176 | BAP1     | GEO |  |
| 2177 | BAPX1    | GEO |  |
| 2178 | BARD1    | GAD |  |
| 2179 | BARX1    | GEO |  |
| 2180 | BASP1    | GEO |  |
| 2181 | BAT2     | GAD |  |
| 2182 | BAT2L2   | GEO |  |
| 2183 | BAT3     | GEO |  |
| 2184 | BAX      | GAD |  |
| 2185 | BAZ2B    | GEO |  |
| 2186 | BBC3     | GEO |  |
| 2187 | BBS10    | GEO |  |
| 2188 | BBS4     | GEO |  |
| 2189 | BBS5     | GEO |  |
| 2190 | BBS9     | GEO |  |
| 2191 | BCAN     | GEO |  |
| 2192 | BCAP29   | GEO |  |
| 2193 | BCAP31   | GEO |  |
| 2194 | BCAS3    | GEO |  |
| 2195 | BCAS4    | GEO |  |
| 2196 | BCAT1    | GEO |  |
| 2197 | BCHE     | GEO |  |
| 2198 | BCKDHB   | GEO |  |

|      |         |      |  |
|------|---------|------|--|
| 2199 | BCL10   | GEO  |  |
| 2200 | BCL11A  | GEO  |  |
| 2201 | BCL2    | GEO  |  |
| 2202 | BCL2A1  | GEO  |  |
| 2203 | BCL2L1  | Both |  |
| 2204 | BCL2L12 | GEO  |  |
| 2205 | BCL2L14 | GEO  |  |
| 2206 | BCL2L15 | GEO  |  |
| 2207 | BCL3    | GAD  |  |
| 2208 | BCL6    | GEO  |  |
| 2209 | BCL6B   | GEO  |  |
| 2210 | BCL8    | GEO  |  |
| 2211 | BCL9    | GEO  |  |
| 2212 | BCLAF1  | GEO  |  |
| 2213 | BCLP    | GEO  |  |
| 2214 | BCORL1  | GEO  |  |
| 2215 | BCR     | GEO  |  |
| 2216 | BCYRN1  | GEO  |  |
| 2217 | BDKRB2  | GEO  |  |
| 2218 | BDNF    | GEO  |  |
| 2219 | BEND6   | GEO  |  |
| 2220 | BEND7   | GEO  |  |
| 2221 | BEST2   | GEO  |  |
| 2222 | BEX1    | GEO  |  |
| 2223 | BEX2    | GEO  |  |
| 2224 | BF      | GEO  |  |
| 2225 | BFAR    | GEO  |  |
| 2226 | BHLHB3  | GEO  |  |
| 2227 | BHLHE22 | GEO  |  |
| 2228 | BHLHE40 | GEO  |  |
| 2229 | BHMT    | GAD  |  |
| 2230 | BID     | Both |  |
| 2231 | BIK     | GEO  |  |
| 2232 | BIRC2   | GEO  |  |
| 2233 | BIRC3   | GEO  |  |
| 2234 | BIRC5   | GAD  |  |
| 2235 | BIRC6   | GEO  |  |
| 2236 | BLCAP   | GEO  |  |
| 2237 | BLK     | GEO  |  |
| 2238 | BLM     | GAD  |  |
| 2239 | BLMH    | GEO  |  |
| 2240 | BLNK    | GEO  |  |
| 2241 | BLOC1S2 | GEO  |  |
| 2242 | BLVRA   | GEO  |  |
| 2243 | BM039   | GEO  |  |
| 2244 | BMP1    | GAD  |  |
| 2245 | BMP2K   | GEO  |  |
| 2246 | BMP4    | Both |  |
| 2247 | BMP5    | GEO  |  |
| 2248 | BMP8A   | GEO  |  |

|      |           |      |  |
|------|-----------|------|--|
| 2249 | BMP8B     | GEO  |  |
| 2250 | BMPR1B    | GEO  |  |
| 2251 | BMPR2     | GAD  |  |
| 2252 | BMS1      | GEO  |  |
| 2253 | BMS1P1    | GEO  |  |
| 2254 | BMX       | GEO  |  |
| 2255 | BNIP2     | GEO  |  |
| 2256 | BNIP3     | GEO  |  |
| 2257 | BNIP3L    | GEO  |  |
| 2258 | BPGM      | GEO  |  |
| 2259 | BPI       | Both |  |
| 2260 | BRAF      | GAD  |  |
| 2261 | BRCA1     | Both |  |
| 2262 | BRCA2     | Both |  |
| 2263 | BRD1      | GEO  |  |
| 2264 | BRD2      | GEO  |  |
| 2265 | BRD3      | GEO  |  |
| 2266 | BRD4      | GEO  |  |
| 2267 | BRD8      | GEO  |  |
| 2268 | BRF2      | GEO  |  |
| 2269 | BRI3BP    | GEO  |  |
| 2270 | BRSK2     | GEO  |  |
| 2271 | BRUNOL4   | GAD  |  |
| 2272 | BRWD1     | GAD  |  |
| 2273 | BRWD3     | GEO  |  |
| 2274 | BSG       | GEO  |  |
| 2275 | BSN       | GAD  |  |
| 2276 | BTBD1     | GEO  |  |
| 2277 | BTBD3     | GEO  |  |
| 2278 | BTBD7     | GEO  |  |
| 2279 | BTG1      | GEO  |  |
| 2280 | BTK       | GEO  |  |
| 2281 | BTN2A2    | GEO  |  |
| 2282 | BTN2A3    | GEO  |  |
| 2283 | BTN3A3    | GEO  |  |
| 2284 | BTNL2     | Both |  |
| 2285 | BTNL8     | GEO  |  |
| 2286 | BTRC      | Both |  |
| 2287 | BUB1      | GEO  |  |
| 2288 | BUD31     | GEO  |  |
| 2289 | BVES      | GEO  |  |
| 2290 | BYSL      | GEO  |  |
| 2291 | BZW1      | GEO  |  |
| 2292 | C10orf11  | GEO  |  |
| 2293 | C10orf112 | GEO  |  |
| 2294 | C10orf118 | GEO  |  |
| 2295 | C10orf137 | GEO  |  |
| 2296 | C10orf140 | GEO  |  |
| 2297 | C10ORF26  | GEO  |  |
| 2298 | C10orf32  | GEO  |  |

|      |           |      |  |
|------|-----------|------|--|
| 2299 | C10orf4   | GEO  |  |
| 2300 | C10orf47  | GEO  |  |
| 2301 | C10orf54  | GEO  |  |
| 2302 | C10orf58  | GEO  |  |
| 2303 | C10orf67  | GAD  |  |
| 2304 | C10orf71  | GEO  |  |
| 2305 | C10orf72  | GEO  |  |
| 2306 | C11orf20  | GEO  |  |
| 2307 | C11orf30  | Both |  |
| 2308 | C11orf33  | GEO  |  |
| 2309 | C11orf41  | GEO  |  |
| 2310 | C11orf45  | GEO  |  |
| 2311 | C11orf53  | Both |  |
| 2312 | C11orf54  | GEO  |  |
| 2313 | C11orf58  | GEO  |  |
| 2314 | C11orf63  | GEO  |  |
| 2315 | C11orf65  | GEO  |  |
| 2316 | C11orf71  | GEO  |  |
| 2317 | C11orf80  | GEO  |  |
| 2318 | C11orf82  | GEO  |  |
| 2319 | C11orf86  | GEO  |  |
| 2320 | C11orf9   | GEO  |  |
| 2321 | C11orf93  | GEO  |  |
| 2322 | C12orf11  | GEO  |  |
| 2323 | C12orf27  | GEO  |  |
| 2324 | C12orf29  | GEO  |  |
| 2325 | C12ORF30  | GAD  |  |
| 2326 | C12orf32  | GEO  |  |
| 2327 | C12orf35  | GEO  |  |
| 2328 | C12orf44  | GEO  |  |
| 2329 | C12orf48  | GEO  |  |
| 2330 | C12orf57  | GEO  |  |
| 2331 | C12orf59  | GEO  |  |
| 2332 | C13orf15  | GEO  |  |
| 2333 | C13orf18  | GEO  |  |
| 2334 | C13orf23  | GEO  |  |
| 2335 | C13orf30  | GEO  |  |
| 2336 | C13ORF31  | GAD  |  |
| 2337 | C14orf100 | GEO  |  |
| 2338 | C14orf106 | GEO  |  |
| 2339 | C14orf115 | GEO  |  |
| 2340 | C14orf118 | GEO  |  |
| 2341 | C14orf126 | GEO  |  |
| 2342 | C14orf132 | GEO  |  |
| 2343 | C14orf138 | GEO  |  |
| 2344 | C14orf145 | GEO  |  |
| 2345 | C14ORF147 | GEO  |  |
| 2346 | C14orf149 | GEO  |  |
| 2347 | C14orf159 | GEO  |  |
| 2348 | C14orf176 | GEO  |  |

|      |          |      |  |
|------|----------|------|--|
| 2349 | C14orf28 | GEO  |  |
| 2350 | C14orf4  | GEO  |  |
| 2351 | C14orf49 | GEO  |  |
| 2352 | C14orf50 | GEO  |  |
| 2353 | C14orf58 | GEO  |  |
| 2354 | C15orf24 | GEO  |  |
| 2355 | C15orf29 | GEO  |  |
| 2356 | C15orf42 | GEO  |  |
| 2357 | C15orf57 | GEO  |  |
| 2358 | C15orf58 | GEO  |  |
| 2359 | C15orf61 | GEO  |  |
| 2360 | C16orf13 | GEO  |  |
| 2361 | C16orf46 | GEO  |  |
| 2362 | C16orf53 | GEO  |  |
| 2363 | C16orf75 | Both |  |
| 2364 | C16orf81 | GEO  |  |
| 2365 | C16orf89 | GEO  |  |
| 2366 | C17orf27 | GEO  |  |
| 2367 | C17orf39 | GEO  |  |
| 2368 | C17orf45 | GEO  |  |
| 2369 | C17orf67 | GEO  |  |
| 2370 | C17orf69 | GEO  |  |
| 2371 | C17orf70 | GEO  |  |
| 2372 | C17orf73 | GEO  |  |
| 2373 | C17orf76 | GEO  |  |
| 2374 | C17orf79 | GEO  |  |
| 2375 | C17orf81 | GEO  |  |
| 2376 | C17orf85 | GEO  |  |
| 2377 | C18orf17 | GEO  |  |
| 2378 | C18orf24 | GEO  |  |
| 2379 | C18orf54 | GEO  |  |
| 2380 | C19orf10 | GAD  |  |
| 2381 | C19orf2  | GEO  |  |
| 2382 | C19orf23 | GEO  |  |
| 2383 | C19orf33 | GEO  |  |
| 2384 | C19orf40 | GEO  |  |
| 2385 | C19orf42 | GEO  |  |
| 2386 | C19orf43 | GEO  |  |
| 2387 | C19orf45 | GEO  |  |
| 2388 | C19orf48 | GEO  |  |
| 2389 | C19orf51 | GEO  |  |
| 2390 | C19orf59 | GEO  |  |
| 2391 | C19orf6  | GEO  |  |
| 2392 | C19orf66 | GEO  |  |
| 2393 | C19orf70 | GEO  |  |
| 2394 | C19orf77 | GEO  |  |
| 2395 | C1orf106 | GEO  |  |
| 2396 | C1orf107 | GEO  |  |
| 2397 | C1ORF108 | GEO  |  |
| 2398 | C1orf116 | GEO  |  |

|      |           |     |  |
|------|-----------|-----|--|
| 2399 | C1orf125  | GEO |  |
| 2400 | C1orf133  | GEO |  |
| 2401 | C1orf161  | GEO |  |
| 2402 | C1orf173  | GEO |  |
| 2403 | C1orf174  | GEO |  |
| 2404 | C1orf175  | GEO |  |
| 2405 | C1orf178  | GEO |  |
| 2406 | C1orf186  | GEO |  |
| 2407 | C1orf21   | GEO |  |
| 2408 | C1orf226  | GEO |  |
| 2409 | C1orf52   | GEO |  |
| 2410 | C1orf56   | GEO |  |
| 2411 | C1orf57   | GEO |  |
| 2412 | C1orf66   | GEO |  |
| 2413 | C1orf67   | GEO |  |
| 2414 | C1orf75   | GEO |  |
| 2415 | C1orf77   | GEO |  |
| 2416 | C1orf81   | GAD |  |
| 2417 | C1orf97   | GEO |  |
| 2418 | C1QA      | GEO |  |
| 2419 | C1QB      | GEO |  |
| 2420 | C1QBP     | GEO |  |
| 2421 | C1QC      | GEO |  |
| 2422 | C1QTNF1   | GEO |  |
| 2423 | C1R       | GEO |  |
| 2424 | C1RL      | GEO |  |
| 2425 | C1S       | GEO |  |
| 2426 | C20orf103 | GEO |  |
| 2427 | C20orf11  | GEO |  |
| 2428 | C20orf117 | GEO |  |
| 2429 | C20orf118 | GEO |  |
| 2430 | C20orf132 | GEO |  |
| 2431 | C20orf151 | GEO |  |
| 2432 | C20orf152 | GEO |  |
| 2433 | C20orf194 | GEO |  |
| 2434 | C20ORF198 | GEO |  |
| 2435 | C20orf39  | GEO |  |
| 2436 | C20orf4   | GEO |  |
| 2437 | C20orf42  | GEO |  |
| 2438 | C20orf43  | GEO |  |
| 2439 | C20orf74  | GEO |  |
| 2440 | C20orf94  | GEO |  |
| 2441 | C20orf96  | GEO |  |
| 2442 | C20orf98  | GEO |  |
| 2443 | C21orf129 | GEO |  |
| 2444 | C21orf2   | GEO |  |
| 2445 | C21orf49  | GEO |  |
| 2446 | C21orf56  | GEO |  |
| 2447 | C21orf57  | GEO |  |
| 2448 | C21orf58  | GEO |  |

|      |          |      |  |
|------|----------|------|--|
| 2449 | C21orf63 | GEO  |  |
| 2450 | C21orf66 | GEO  |  |
| 2451 | C21orf7  | GEO  |  |
| 2452 | C21orf70 | GEO  |  |
| 2453 | C21orf71 | GEO  |  |
| 2454 | C21orf88 | GEO  |  |
| 2455 | C22orf16 | GEO  |  |
| 2456 | C22orf34 | GEO  |  |
| 2457 | C22orf45 | GEO  |  |
| 2458 | C2CD4A   | GEO  |  |
| 2459 | C2orf14  | GEO  |  |
| 2460 | C2orf27  | GEO  |  |
| 2461 | C2orf28  | GEO  |  |
| 2462 | C2orf3   | GEO  |  |
| 2463 | C2orf40  | GEO  |  |
| 2464 | C2orf55  | GEO  |  |
| 2465 | C2orf58  | GEO  |  |
| 2466 | C2orf61  | GEO  |  |
| 2467 | C2orf65  | GAD  |  |
| 2468 | C2orf67  | GEO  |  |
| 2469 | C2orf68  | GEO  |  |
| 2470 | C2orf69  | GEO  |  |
| 2471 | C2orf7   | GEO  |  |
| 2472 | C2orf70  | GEO  |  |
| 2473 | C2orf72  | GEO  |  |
| 2474 | C2orf76  | GEO  |  |
| 2475 | C2orf89  | GEO  |  |
| 2476 | C3       | Both |  |
| 2477 | C3orf10  | GEO  |  |
| 2478 | C3orf16  | GEO  |  |
| 2479 | C3orf23  | GEO  |  |
| 2480 | C3orf31  | GEO  |  |
| 2481 | C3orf32  | GEO  |  |
| 2482 | C3orf34  | GEO  |  |
| 2483 | C3orf35  | GEO  |  |
| 2484 | C3orf38  | GEO  |  |
| 2485 | C3orf65  | GEO  |  |
| 2486 | C3orf67  | GEO  |  |
| 2487 | C3orf70  | GEO  |  |
| 2488 | C4A      | GEO  |  |
| 2489 | C4BPA    | GEO  |  |
| 2490 | C4BPB    | GEO  |  |
| 2491 | C4orf14  | GEO  |  |
| 2492 | C4ORF16  | GEO  |  |
| 2493 | C4orf27  | GEO  |  |
| 2494 | C4orf30  | GEO  |  |
| 2495 | C4orf39  | GEO  |  |
| 2496 | C4orf48  | GEO  |  |
| 2497 | C4orf49  | GEO  |  |
| 2498 | C4orf52  | GEO  |  |



|      |          |     |  |
|------|----------|-----|--|
| 2499 | C5       | GEO |  |
| 2500 | C5AR1    | GEO |  |
| 2501 | C5orf13  | GEO |  |
| 2502 | C5orf17  | GEO |  |
| 2503 | C5orf20  | GEO |  |
| 2504 | C5orf22  | GEO |  |
| 2505 | C5orf27  | GEO |  |
| 2506 | C5orf30  | GEO |  |
| 2507 | C5orf35  | GEO |  |
| 2508 | C5orf4   | GEO |  |
| 2509 | C5orf46  | GEO |  |
| 2510 | C5ORF5   | GEO |  |
| 2511 | C5orf56  | GAD |  |
| 2512 | C6       | GEO |  |
| 2513 | C6ORF10  | GAD |  |
| 2514 | C6ORF106 | GAD |  |
| 2515 | C6orf108 | GEO |  |
| 2516 | C6orf111 | GEO |  |
| 2517 | C6orf118 | GEO |  |
| 2518 | C6orf132 | GEO |  |
| 2519 | C6orf136 | GEO |  |
| 2520 | C6orf145 | GEO |  |
| 2521 | C6orf15  | GEO |  |
| 2522 | C6orf168 | GEO |  |
| 2523 | C6orf170 | GEO |  |
| 2524 | C6ORF173 | GAD |  |
| 2525 | C6orf174 | GEO |  |
| 2526 | C6orf192 | GEO |  |
| 2527 | C6orf26  | GEO |  |
| 2528 | C6orf29  | GEO |  |
| 2529 | C6orf57  | GEO |  |
| 2530 | C6orf64  | GEO |  |
| 2531 | C7orf23  | GEO |  |
| 2532 | C7orf30  | GEO |  |
| 2533 | C7orf31  | GEO |  |
| 2534 | C7orf36  | GEO |  |
| 2535 | C7orf38  | GEO |  |
| 2536 | C7orf46  | GEO |  |
| 2537 | C7ORF47  | GEO |  |
| 2538 | C7orf54  | GEO |  |
| 2539 | C8A      | GEO |  |
| 2540 | C8ORF30A | GEO |  |
| 2541 | C8orf33  | GEO |  |
| 2542 | C8orf4   | GEO |  |
| 2543 | C8orf46  | GEO |  |
| 2544 | C8orf60  | GEO |  |
| 2545 | C8orf74  | GEO |  |
| 2546 | C8orf83  | GEO |  |
| 2547 | C8orf85  | GAD |  |
| 2548 | C9orf127 | GEO |  |

|      |           |      |  |
|------|-----------|------|--|
| 2549 | C9orf140  | GEO  |  |
| 2550 | C9orf152  | GEO  |  |
| 2551 | C9ORF19   | GEO  |  |
| 2552 | C9orf23   | GEO  |  |
| 2553 | C9orf24   | GEO  |  |
| 2554 | C9orf3    | GEO  |  |
| 2555 | C9orf30   | GEO  |  |
| 2556 | C9orf40   | GEO  |  |
| 2557 | C9orf45   | GEO  |  |
| 2558 | C9orf61   | GEO  |  |
| 2559 | C9orf72   | GEO  |  |
| 2560 | C9orf86   | GEO  |  |
| 2561 | C9orf91   | GEO  |  |
| 2562 | CA10      | GEO  |  |
| 2563 | CA11      | GEO  |  |
| 2564 | CA13      | GEO  |  |
| 2565 | CA6       | Both |  |
| 2566 | CAB39L    | GEO  |  |
| 2567 | CABLES1   | GEO  |  |
| 2568 | CABP1     | GEO  |  |
| 2569 | CABP7     | GEO  |  |
| 2570 | CACNA1A   | GEO  |  |
| 2571 | CACNA1H   | GEO  |  |
| 2572 | CACNA2D2  | GEO  |  |
| 2573 | CACNA2D4  | GEO  |  |
| 2574 | CACNB2    | GEO  |  |
| 2575 | CACNB4    | GEO  |  |
| 2576 | CACNG1    | GEO  |  |
| 2577 | CADM1     | Both |  |
| 2578 | CADM2     | GAD  |  |
| 2579 | CADM3     | GEO  |  |
| 2580 | CADM4     | GEO  |  |
| 2581 | CADPS2    | GEO  |  |
| 2582 | CALB1     | GEO  |  |
| 2583 | CALB2     | GAD  |  |
| 2584 | CALCOCO2  | GEO  |  |
| 2585 | CALCRL    | GEO  |  |
| 2586 | CALHM2    | GEO  |  |
| 2587 | CALM1     | GEO  |  |
| 2588 | CALML4    | GEO  |  |
| 2589 | CALU      | GEO  |  |
| 2590 | CAMK1     | GEO  |  |
| 2591 | CAMK2D    | GEO  |  |
| 2592 | CAMK2N1   | GEO  |  |
| 2593 | CAMKK2    | GEO  |  |
| 2594 | CAMSAP1L1 | GEO  |  |
| 2595 | CAP2      | GEO  |  |
| 2596 | CAPG      | GEO  |  |
| 2597 | CAPN10    | Both |  |
| 2598 | CAPN13    | GEO  |  |

|      |          |      |  |
|------|----------|------|--|
| 2599 | CAPN2    | GEO  |  |
| 2600 | CAPN3    | GEO  |  |
| 2601 | CAPN6    | GEO  |  |
| 2602 | CAPN8    | GEO  |  |
| 2603 | CAPRN2   | GEO  |  |
| 2604 | CAPZA2   | GEO  |  |
| 2605 | CAPZB    | GEO  |  |
| 2606 | CARD11   | GEO  |  |
| 2607 | CARD14   | GEO  |  |
| 2608 | CARD15   | GAD  |  |
| 2609 | CARD16   | GEO  |  |
| 2610 | CARD4    | GAD  |  |
| 2611 | CARD8    | GAD  |  |
| 2612 | CARD9    | GAD  |  |
| 2613 | CARKD    | GEO  |  |
| 2614 | CARM1    | GEO  |  |
| 2615 | CARS     | GEO  |  |
| 2616 | CARS2    | GEO  |  |
| 2617 | CAS1     | GEO  |  |
| 2618 | CASC4    | GEO  |  |
| 2619 | CASC5    | GEO  |  |
| 2620 | CASD1    | GEO  |  |
| 2621 | CASK     | GEO  |  |
| 2622 | CASP1    | GEO  |  |
| 2623 | CASP10   | GAD  |  |
| 2624 | CASP14   | GAD  |  |
| 2625 | CASP3    | GAD  |  |
| 2626 | CASP5    | GEO  |  |
| 2627 | CASP7    | GAD  |  |
| 2628 | CASP8    | GAD  |  |
| 2629 | CASP8AP2 | Both |  |
| 2630 | CASP9    | GAD  |  |
| 2631 | CASQ2    | GEO  |  |
| 2632 | CASR     | GAD  |  |
| 2633 | CASS4    | GEO  |  |
| 2634 | CASZ1    | GEO  |  |
| 2635 | CAT      | GAD  |  |
| 2636 | CATSPER2 | GEO  |  |
| 2637 | CAV1     | Both |  |
| 2638 | CAV2     | GEO  |  |
| 2639 | CBFA2T2  | GEO  |  |
| 2640 | CBFA2T3  | GEO  |  |
| 2641 | CBLB     | GEO  |  |
| 2642 | CBLC     | GEO  |  |
| 2643 | CBLN1    | GEO  |  |
| 2644 | CBLN2    | GEO  |  |
| 2645 | CBX4     | GEO  |  |
| 2646 | CBX5     | GEO  |  |
| 2647 | CBX7     | GEO  |  |
| 2648 | CBX8     | GEO  |  |

|      |          |     |  |
|------|----------|-----|--|
| 2649 | CBY1     | GEO |  |
| 2650 | CC50B    | GEO |  |
| 2651 | CCBL1    | GEO |  |
| 2652 | CCBP2    | GEO |  |
| 2653 | CCDC101  | GAD |  |
| 2654 | CCDC102B | GEO |  |
| 2655 | CCDC104  | GEO |  |
| 2656 | CCDC108  | GEO |  |
| 2657 | CCDC109A | GEO |  |
| 2658 | CCDC112  | GEO |  |
| 2659 | CCDC113  | GEO |  |
| 2660 | CCDC12   | GEO |  |
| 2661 | CCDC123  | GEO |  |
| 2662 | CCDC127  | GEO |  |
| 2663 | CCDC130  | GEO |  |
| 2664 | CCDC132  | GEO |  |
| 2665 | CCDC136  | GEO |  |
| 2666 | CCDC139  | GAD |  |
| 2667 | CCDC14   | GEO |  |
| 2668 | CCDC144A | GEO |  |
| 2669 | CCDC144B | GEO |  |
| 2670 | CCDC146  | GEO |  |
| 2671 | CCDC149  | GEO |  |
| 2672 | CCDC153  | GEO |  |
| 2673 | CCDC16   | GEO |  |
| 2674 | CCDC18   | GEO |  |
| 2675 | CCDC19   | GEO |  |
| 2676 | CCDC24   | GEO |  |
| 2677 | CCDC28A  | GEO |  |
| 2678 | CCDC28B  | GEO |  |
| 2679 | CCDC29   | GEO |  |
| 2680 | CCDC45   | GEO |  |
| 2681 | CCDC46   | GEO |  |
| 2682 | CCDC51   | GEO |  |
| 2683 | CCDC52   | GEO |  |
| 2684 | CCDC59   | GEO |  |
| 2685 | CCDC64   | GEO |  |
| 2686 | CCDC66   | GEO |  |
| 2687 | CCDC71   | GEO |  |
| 2688 | CCDC74B  | GEO |  |
| 2689 | CCDC76   | GEO |  |
| 2690 | CCDC8    | GEO |  |
| 2691 | CCDC82   | GEO |  |
| 2692 | CCDC84   | GEO |  |
| 2693 | CCDC85B  | GEO |  |
| 2694 | CCDC86   | GEO |  |
| 2695 | CCDC88A  | GEO |  |
| 2696 | CCDC88B  | GEO |  |
| 2697 | CCDC92   | GEO |  |
| 2698 | CCDC93   | GEO |  |

|      |             |      |  |
|------|-------------|------|--|
| 2699 | CCL1        | GAD  |  |
| 2700 | CCL11       | Both |  |
| 2701 | CCL13       | GEO  |  |
| 2702 | CCL14-CCL15 | GEO  |  |
| 2703 | CCL18       | GEO  |  |
| 2704 | CCL19       | GEO  |  |
| 2705 | CCL2        | Both |  |
| 2706 | CCL22       | GEO  |  |
| 2707 | CCL24       | Both |  |
| 2708 | CCL26       | GAD  |  |
| 2709 | CCL28       | GEO  |  |
| 2710 | CCL3        | GEO  |  |
| 2711 | CCL4        | GEO  |  |
| 2712 | CCL4L1      | GEO  |  |
| 2713 | CCNA2       | GEO  |  |
| 2714 | CCNB1IP1    | GEO  |  |
| 2715 | CCNB2       | GEO  |  |
| 2716 | CCNB3       | GEO  |  |
| 2717 | CCND1       | Both |  |
| 2718 | CCND2       | GEO  |  |
| 2719 | CCND3       | GEO  |  |
| 2720 | CCNDBP1     | GEO  |  |
| 2721 | CCNE2       | GEO  |  |
| 2722 | CCNH        | GAD  |  |
| 2723 | CCNI        | GEO  |  |
| 2724 | CCNJL       | GEO  |  |
| 2725 | CCNL1       | GEO  |  |
| 2726 | CCNL2       | GEO  |  |
| 2727 | CCNT1       | GEO  |  |
| 2728 | CCNU        | GEO  |  |
| 2729 | CCNY        | Both |  |
| 2730 | CCNYL1      | GEO  |  |
| 2731 | CCPG1       | GEO  |  |
| 2732 | CCR1        | GEO  |  |
| 2733 | CCR2        | Both |  |
| 2734 | CCR5        | GAD  |  |
| 2735 | CCR6        | Both |  |
| 2736 | CCR7        | GEO  |  |
| 2737 | CCRL2       | GEO  |  |
| 2738 | CCT2        | GEO  |  |
| 2739 | CCT6A       | GEO  |  |
| 2740 | CD163L1     | GEO  |  |
| 2741 | CD164L2     | GEO  |  |
| 2742 | CD19        | GAD  |  |
| 2743 | CD1A        | GEO  |  |
| 2744 | CD1B        | GEO  |  |
| 2745 | CD1D        | GEO  |  |
| 2746 | CD1E        | GEO  |  |
| 2747 | CD209       | Both |  |
| 2748 | CD22        | GEO  |  |

|      |          |      |  |
|------|----------|------|--|
| 2749 | CD226    | GEO  |  |
| 2750 | CD27     | GEO  |  |
| 2751 | CD28     | GAD  |  |
| 2752 | CD300A   | GEO  |  |
| 2753 | CD302    | GEO  |  |
| 2754 | CD33     | GEO  |  |
| 2755 | CD34     | GEO  |  |
| 2756 | CD3D     | GEO  |  |
| 2757 | CD3E     | GEO  |  |
| 2758 | CD3EAP   | Both |  |
| 2759 | CD40     | GEO  |  |
| 2760 | CD46     | GEO  |  |
| 2761 | CD47     | GEO  |  |
| 2762 | CD53     | GEO  |  |
| 2763 | CD55     | GEO  |  |
| 2764 | CD58     | GEO  |  |
| 2765 | CD5L     | GEO  |  |
| 2766 | CD6      | GEO  |  |
| 2767 | CD68     | GEO  |  |
| 2768 | CD74     | GEO  |  |
| 2769 | CD84     | GEO  |  |
| 2770 | CD86     | Both |  |
| 2771 | CD8A     | GEO  |  |
| 2772 | CD9      | GEO  |  |
| 2773 | CD93     | GEO  |  |
| 2774 | CD99     | GEO  |  |
| 2775 | CD99L2   | GEO  |  |
| 2776 | CDA      | Both |  |
| 2777 | CDC123   | GEO  |  |
| 2778 | CDC14A   | Both |  |
| 2779 | CDC14B   | GEO  |  |
| 2780 | CDC16    | GEO  |  |
| 2781 | CDC2     | GEO  |  |
| 2782 | CDC2L1   | GEO  |  |
| 2783 | CDC34    | GEO  |  |
| 2784 | CDC37L1  | GEO  |  |
| 2785 | CDC40    | GAD  |  |
| 2786 | CDC42    | GEO  |  |
| 2787 | CDC42SE1 | GEO  |  |
| 2788 | CDC42SE2 | GEO  |  |
| 2789 | CDC45    | GEO  |  |
| 2790 | CDC45L   | GAD  |  |
| 2791 | CDCA2    | GEO  |  |
| 2792 | CDCA3    | GEO  |  |
| 2793 | CDCA5    | GEO  |  |
| 2794 | CDCA7    | GEO  |  |
| 2795 | CDCA8    | GEO  |  |
| 2796 | CDGAP    | GEO  |  |
| 2797 | CDH11    | GEO  |  |
| 2798 | CDH13    | GEO  |  |

|      |            |      |  |
|------|------------|------|--|
| 2799 | CDH17      | GEO  |  |
| 2800 | CDH19      | GEO  |  |
| 2801 | CDH23      | GEO  |  |
| 2802 | CDH24      | GEO  |  |
| 2803 | CDH26      | GEO  |  |
| 2804 | CDH29      | GAD  |  |
| 2805 | CDH4       | GEO  |  |
| 2806 | CDH5       | GEO  |  |
| 2807 | CDH8       | GEO  |  |
| 2808 | CDHR1      | GEO  |  |
| 2809 | CDHR5      | GEO  |  |
| 2810 | CDK1       | GEO  |  |
| 2811 | CDK11A     | GEO  |  |
| 2812 | CDK13      | GEO  |  |
| 2813 | CDK14      | GEO  |  |
| 2814 | CDK15      | GEO  |  |
| 2815 | CDK3       | GEO  |  |
| 2816 | CDK5RAP2   | GEO  |  |
| 2817 | CDK6       | Both |  |
| 2818 | CDK7       | Both |  |
| 2819 | CDK8       | GEO  |  |
| 2820 | CDK9       | GEO  |  |
| 2821 | CDKAL1     | GAD  |  |
| 2822 | CDKL1      | GEO  |  |
| 2823 | CDKL2      | GEO  |  |
| 2824 | CDKL3      | GEO  |  |
| 2825 | CDKN1A     | GAD  |  |
| 2826 | CDKN1B     | GAD  |  |
| 2827 | CDKN2AIPNL | GEO  |  |
| 2828 | CDKN2B-AS  | GEO  |  |
| 2829 | CDKN2C     | GEO  |  |
| 2830 | CDRT4      | GEO  |  |
| 2831 | CDS1       | GEO  |  |
| 2832 | CDS2       | GEO  |  |
| 2833 | CDT1       | GEO  |  |
| 2834 | CDV3       | GEO  |  |
| 2835 | CDX1       | Both |  |
| 2836 | CDX2       | Both |  |
| 2837 | CEACAM21   | GEO  |  |
| 2838 | CEACAM3    | GEO  |  |
| 2839 | CEACAM4    | GEO  |  |
| 2840 | CEBPD      | GEO  |  |
| 2841 | CECR2      | GEO  |  |
| 2842 | CECR5      | GEO  |  |
| 2843 | CEL        | GEO  |  |
| 2844 | CELA3A     | GEO  |  |
| 2845 | CELA3B     | GEO  |  |
| 2846 | CELF2      | GEO  |  |
| 2847 | CELF4      | GEO  |  |
| 2848 | CELP       | GEO  |  |

|      |        |      |  |
|------|--------|------|--|
| 2849 | CELSR1 | GEO  |  |
| 2850 | CELSR2 | GEO  |  |
| 2851 | CELSR3 | GEO  |  |
| 2852 | CENPA  | GEO  |  |
| 2853 | CENPN  | GEO  |  |
| 2854 | CENPP  | GEO  |  |
| 2855 | CENPV  | GEO  |  |
| 2856 | CEP110 | GEO  |  |
| 2857 | CEP170 | GEO  |  |
| 2858 | CEP250 | GEO  |  |
| 2859 | CEP55  | GEO  |  |
| 2860 | CEP57  | GEO  |  |
| 2861 | CEP63  | GAD  |  |
| 2862 | CEP68  | GEO  |  |
| 2863 | CEP70  | GEO  |  |
| 2864 | CEP72  | Both |  |
| 2865 | CEPT1  | GEO  |  |
| 2866 | CERKL  | GEO  |  |
| 2867 | CES3   | GEO  |  |
| 2868 | CES4A  | GEO  |  |
| 2869 | CETN2  | GEO  |  |
| 2870 | CETP   | Both |  |
| 2871 | CFC1   | GEO  |  |
| 2872 | CFDP1  | GEO  |  |
| 2873 | CFHL1  | GEO  |  |
| 2874 | CFHR1  | GEO  |  |
| 2875 | CFI    | GEO  |  |
| 2876 | CFLAR  | Both |  |
| 2877 | CFP    | GEO  |  |
| 2878 | CGB1   | GEO  |  |
| 2879 | CGGBP1 | GEO  |  |
| 2880 | CGI-38 | GEO  |  |
| 2881 | CGN    | GEO  |  |
| 2882 | CGNL1  | GEO  |  |
| 2883 | CGREF1 | GEO  |  |
| 2884 | CH25H  | GEO  |  |
| 2885 | CHAC1  | GEO  |  |
| 2886 | CHAF1A | GEO  |  |
| 2887 | CHCHD5 | GEO  |  |
| 2888 | CHCHD6 | GEO  |  |
| 2889 | CHCHD7 | GEO  |  |
| 2890 | CHD2   | GEO  |  |
| 2891 | CHD3   | GEO  |  |
| 2892 | CHD7   | GEO  |  |
| 2893 | CHD9   | GEO  |  |
| 2894 | CHEK1  | Both |  |
| 2895 | CHEK2  | GAD  |  |
| 2896 | CHERP  | GEO  |  |
| 2897 | CHFR   | GEO  |  |
| 2898 | CHGB   | GEO  |  |

|      |          |      |  |
|------|----------|------|--|
| 2899 | CHKA     | GEO  |  |
| 2900 | CHMP1B   | GEO  |  |
| 2901 | CHMP2B   | GEO  |  |
| 2902 | CHMP4A   | GEO  |  |
| 2903 | CHN1     | GEO  |  |
| 2904 | CHN2     | GEO  |  |
| 2905 | CHODL    | GEO  |  |
| 2906 | CHORDC1  | GEO  |  |
| 2907 | CHP      | GEO  |  |
| 2908 | CHPF     | GEO  |  |
| 2909 | CHPT1    | GEO  |  |
| 2910 | CHRD1    | GEO  |  |
| 2911 | CHRD12   | GEO  |  |
| 2912 | CHRFAM7A | GEO  |  |
| 2913 | CHRM2    | GEO  |  |
| 2914 | CHRNA1   | GEO  |  |
| 2915 | CHRNA5   | GEO  |  |
| 2916 | CHRNA5   | GEO  |  |
| 2917 | CHRNA5   | GEO  |  |
| 2918 | CHST15   | GEO  |  |
| 2919 | CHST3    | GEO  |  |
| 2920 | CHST5    | GEO  |  |
| 2921 | CHST7    | GEO  |  |
| 2922 | CHUK     | GEO  |  |
| 2923 | CHURC1   | GEO  |  |
| 2924 | CI152    | GEO  |  |
| 2925 | CIAPIN1  | GEO  |  |
| 2926 | CIB1     | GEO  |  |
| 2927 | CIB2     | GEO  |  |
| 2928 | CIDEC    | GEO  |  |
| 2929 | CIITA    | Both |  |
| 2930 | CILP     | GEO  |  |
| 2931 | CILP2    | GEO  |  |
| 2932 | CISD1    | GEO  |  |
| 2933 | CIT      | GEO  |  |
| 2934 | CITED2   | GEO  |  |
| 2935 | CKAP5    | GEO  |  |
| 2936 | CKIP-1   | GEO  |  |
| 2937 | CKLF     | GEO  |  |
| 2938 | CKM      | GEO  |  |
| 2939 | CKMT1    | GEO  |  |
| 2940 | CKMT1A   | GEO  |  |
| 2941 | CKMT1B   | GEO  |  |
| 2942 | CKMT2    | GEO  |  |
| 2943 | CKS2     | GEO  |  |
| 2944 | CLASP2   | GEO  |  |
| 2945 | CLASRP   | GEO  |  |
| 2946 | CLC      | GEO  |  |
| 2947 | CLCC1    | GEO  |  |
| 2948 | CLCN4    | GEO  |  |

|      |         |      |  |
|------|---------|------|--|
| 2949 | CLCN5   | GEO  |  |
| 2950 | CLCN7   | GEO  |  |
| 2951 | CLDN10  | GEO  |  |
| 2952 | CLDN15  | GEO  |  |
| 2953 | CLDN18  | GEO  |  |
| 2954 | CLDN4   | GEO  |  |
| 2955 | CLDN7   | GEO  |  |
| 2956 | CLDN8   | GEO  |  |
| 2957 | CLDND1  | GEO  |  |
| 2958 | CLEC10A | GEO  |  |
| 2959 | CLEC11A | GEO  |  |
| 2960 | CLEC16A | GAD  |  |
| 2961 | CLEC1B  | GAD  |  |
| 2962 | CLEC2D  | GEO  |  |
| 2963 | CLEC4D  | GEO  |  |
| 2964 | CLEC4G  | GEO  |  |
| 2965 | CLEC5A  | GEO  |  |
| 2966 | CLEC7A  | Both |  |
| 2967 | CLECL1  | GEO  |  |
| 2968 | CLGN    | GEO  |  |
| 2969 | CLIC2   | GEO  |  |
| 2970 | CLIP3   | GEO  |  |
| 2971 | CLIP4   | GEO  |  |
| 2972 | CLK1    | GEO  |  |
| 2973 | CLN3    | Both |  |
| 2974 | CLN5    | GEO  |  |
| 2975 | CLNK    | GEO  |  |
| 2976 | CLPTM1L | GAD  |  |
| 2977 | CLSTN2  | GAD  |  |
| 2978 | CLTA    | GEO  |  |
| 2979 | CLTB    | GEO  |  |
| 2980 | CLTCL1  | GEO  |  |
| 2981 | CLUAP1  | GEO  |  |
| 2982 | CLYBL   | GEO  |  |
| 2983 | CMAS    | GEO  |  |
| 2984 | CMBL    | GEO  |  |
| 2985 | CMC1    | GEO  |  |
| 2986 | CMKLR1  | GEO  |  |
| 2987 | CMTM3   | GEO  |  |
| 2988 | CMTM7   | GEO  |  |
| 2989 | CMTM8   | GEO  |  |
| 2990 | CNDP2   | GEO  |  |
| 2991 | CNFN    | GEO  |  |
| 2992 | CNGA3   | GEO  |  |
| 2993 | CNGB1   | GEO  |  |
| 2994 | CNIH4   | GEO  |  |
| 2995 | CNKSRI  | GEO  |  |
| 2996 | CNKSRI3 | GEO  |  |
| 2997 | CNN1    | GEO  |  |
| 2998 | CNNM3   | GEO  |  |

|      |         |      |  |
|------|---------|------|--|
| 2999 | CNNM4   | GEO  |  |
| 3000 | CNOT2   | GEO  |  |
| 3001 | CNOT7   | GEO  |  |
| 3002 | CNOT8   | GEO  |  |
| 3003 | CNPY2   | GEO  |  |
| 3004 | CNPY4   | GEO  |  |
| 3005 | CNR1    | Both |  |
| 3006 | CNTFR   | GEO  |  |
| 3007 | CNTN4   | GEO  |  |
| 3008 | CNTNAP1 | GEO  |  |
| 3009 | CNTNAP2 | GEO  |  |
| 3010 | CNTROB  | GEO  |  |
| 3011 | COBL    | GEO  |  |
| 3012 | COBLL1  | GEO  |  |
| 3013 | COCH    | GEO  |  |
| 3014 | COL11A2 | GEO  |  |
| 3015 | COL12A1 | GEO  |  |
| 3016 | COL14A1 | GEO  |  |
| 3017 | COL15A1 | GEO  |  |
| 3018 | COL16A1 | GEO  |  |
| 3019 | COL18A1 | GEO  |  |
| 3020 | COL24A1 | GEO  |  |
| 3021 | COL2A1  | GEO  |  |
| 3022 | COL4A1  | GEO  |  |
| 3023 | COL4A2  | GEO  |  |
| 3024 | COL4A4  | GEO  |  |
| 3025 | COL4A5  | GEO  |  |
| 3026 | COL4A6  | GEO  |  |
| 3027 | COL5A1  | GEO  |  |
| 3028 | COL5A2  | GEO  |  |
| 3029 | COL5A3  | GEO  |  |
| 3030 | COL6A3  | GEO  |  |
| 3031 | COL7A1  | GEO  |  |
| 3032 | COL8A1  | GEO  |  |
| 3033 | COL9A2  | GEO  |  |
| 3034 | COLQ    | GEO  |  |
| 3035 | COMMD1  | GEO  |  |
| 3036 | COMMD3  | GEO  |  |
| 3037 | COMMD6  | GEO  |  |
| 3038 | COMP    | GEO  |  |
| 3039 | COPA    | GEO  |  |
| 3040 | COPG    | GEO  |  |
| 3041 | COPS3   | GEO  |  |
| 3042 | COPS4   | GEO  |  |
| 3043 | COPS6   | GEO  |  |
| 3044 | COPZ1   | GEO  |  |
| 3045 | COPZ2   | GEO  |  |
| 3046 | CORO1A  | GEO  |  |
| 3047 | CORO1C  | GEO  |  |
| 3048 | CORO2B  | GEO  |  |

|      |          |      |  |
|------|----------|------|--|
| 3049 | COX1     | GAD  |  |
| 3050 | COX11    | GAD  |  |
| 3051 | COX15    | GEO  |  |
| 3052 | COX2     | GAD  |  |
| 3053 | COX3     | GAD  |  |
| 3054 | COX4I1   | GEO  |  |
| 3055 | COX6C    | GEO  |  |
| 3056 | COX7A1   | GEO  |  |
| 3057 | COX8A    | GEO  |  |
| 3058 | CP110    | GEO  |  |
| 3059 | CPA4     | Both |  |
| 3060 | CPA6     | GEO  |  |
| 3061 | CPB1     | GEO  |  |
| 3062 | CPB2     | GEO  |  |
| 3063 | CPD      | GEO  |  |
| 3064 | CPE      | GEO  |  |
| 3065 | CPEB1    | GEO  |  |
| 3066 | CPEB2    | GEO  |  |
| 3067 | CPEB3    | GEO  |  |
| 3068 | CPEB4    | Both |  |
| 3069 | CPNE3    | GEO  |  |
| 3070 | CPNE7    | GEO  |  |
| 3071 | CPPED1   | GEO  |  |
| 3072 | CPS1     | GEO  |  |
| 3073 | CPS1-IT  | GEO  |  |
| 3074 | CPSF2    | GEO  |  |
| 3075 | CPT1A    | GEO  |  |
| 3076 | CPT1B    | GEO  |  |
| 3077 | CR1      | GEO  |  |
| 3078 | CR2      | GEO  |  |
| 3079 | CRABP2   | GEO  |  |
| 3080 | CRAC1    | GAD  |  |
| 3081 | CRB2     | GEO  |  |
| 3082 | CREBZF   | GEO  |  |
| 3083 | CRELD2   | GEO  |  |
| 3084 | CRHBP    | GEO  |  |
| 3085 | CRIM1    | GEO  |  |
| 3086 | CRIP2    | GEO  |  |
| 3087 | CRIPAK   | GEO  |  |
| 3088 | CRISPLD1 | GEO  |  |
| 3089 | CRK      | GEO  |  |
| 3090 | CRLF1    | GEO  |  |
| 3091 | CRNKL1   | GEO  |  |
| 3092 | CROP     | GEO  |  |
| 3093 | CROT     | GEO  |  |
| 3094 | CRTAM    | GEO  |  |
| 3095 | CRTAP    | GEO  |  |
| 3096 | CRTC3    | GEO  |  |
| 3097 | CRY2     | GEO  |  |
| 3098 | CRYAB    | GEO  |  |

|      |         |      |  |
|------|---------|------|--|
| 3099 | CRYBA2  | GEO  |  |
| 3100 | CRYBG3  | GEO  |  |
| 3101 | CRYGS   | GEO  |  |
| 3102 | CRYZ    | GEO  |  |
| 3103 | CRYZL1  | GEO  |  |
| 3104 | CSAG2   | GEO  |  |
| 3105 | CSDE1   | GEO  |  |
| 3106 | CSF3    | GEO  |  |
| 3107 | CSF3R   | GEO  |  |
| 3108 | CSHL1   | GEO  |  |
| 3109 | CSK     | GEO  |  |
| 3110 | CSMD1   | GEO  |  |
| 3111 | CSNK1A1 | GEO  |  |
| 3112 | CSNK1G1 | GEO  |  |
| 3113 | CSNK2A1 | Both |  |
| 3114 | CSNK2B  | GEO  |  |
| 3115 | CSPG5   | GEO  |  |
| 3116 | CSPP1   | GEO  |  |
| 3117 | CSRP1   | GEO  |  |
| 3118 | CSRP2   | GEO  |  |
| 3119 | CST1    | GEO  |  |
| 3120 | CST2    | GEO  |  |
| 3121 | CST4    | GEO  |  |
| 3122 | CST7    | GEO  |  |
| 3123 | CSTA    | GEO  |  |
| 3124 | CSTF1   | GEO  |  |
| 3125 | CTAG1A  | GEO  |  |
| 3126 | CTBP1   | GEO  |  |
| 3127 | CTDSPL2 | GEO  |  |
| 3128 | CTGF    | GEO  |  |
| 3129 | CTH     | GEO  |  |
| 3130 | CTHRC1  | GEO  |  |
| 3131 | CTLA4   | Both |  |
| 3132 | CTNNA2  | GEO  |  |
| 3133 | CTNNAL1 | GEO  |  |
| 3134 | CTNNB1  | Both |  |
| 3135 | CTNNBL1 | GEO  |  |
| 3136 | CTNND1  | GEO  |  |
| 3137 | CTNND2  | GEO  |  |
| 3138 | CTPS    | GEO  |  |
| 3139 | CTPS2   | GEO  |  |
| 3140 | CTSA    | GEO  |  |
| 3141 | CTSB    | Both |  |
| 3142 | CTSD    | GEO  |  |
| 3143 | CTSE    | GEO  |  |
| 3144 | CTSG    | GEO  |  |
| 3145 | CTSH    | GEO  |  |
| 3146 | CTSO    | GEO  |  |
| 3147 | CTSS    | GEO  |  |
| 3148 | CTSW    | GEO  |  |

|      |           |      |  |
|------|-----------|------|--|
| 3149 | CTTN      | GEO  |  |
| 3150 | CTTNBP2   | GEO  |  |
| 3151 | CTTNBP2NL | GEO  |  |
| 3152 | CUBN      | GAD  |  |
| 3153 | CUEDC2    | GEO  |  |
| 3154 | CUL2      | GAD  |  |
| 3155 | CUL4A     | GEO  |  |
| 3156 | CUTC      | GEO  |  |
| 3157 | CUX1      | GEO  |  |
| 3158 | CWF19L2   | GEO  |  |
| 3159 | CX3CL1    | Both |  |
| 3160 | CX3CR1    | GAD  |  |
| 3161 | CXCL10    | GEO  |  |
| 3162 | CXCL11    | Both |  |
| 3163 | CXCL13    | GEO  |  |
| 3164 | CXCL14    | GEO  |  |
| 3165 | CXCL2     | GEO  |  |
| 3166 | CXCL5     | Both |  |
| 3167 | CXCL6     | GEO  |  |
| 3168 | CXCL9     | Both |  |
| 3169 | CXCR3     | GEO  |  |
| 3170 | CXCR4     | Both |  |
| 3171 | CXorf18   | GEO  |  |
| 3172 | CXorf21   | GEO  |  |
| 3173 | CXorf30   | GEO  |  |
| 3174 | CXorf40A  | GEO  |  |
| 3175 | CXorf40B  | GEO  |  |
| 3176 | CXorf57   | GEO  |  |
| 3177 | CXorf9    | GEO  |  |
| 3178 | CXXC5     | GEO  |  |
| 3179 | CXYorf3   | GEO  |  |
| 3180 | CYB5A     | GEO  |  |
| 3181 | CYB5B     | GEO  |  |
| 3182 | CYB5D1    | GEO  |  |
| 3183 | CYB5R1    | GEO  |  |
| 3184 | CYB5R2    | GEO  |  |
| 3185 | CYBA      | Both |  |
| 3186 | CYBRD1    | GEO  |  |
| 3187 | CYCS      | GEO  |  |
| 3188 | CYFIP1    | GEO  |  |
| 3189 | CYHR1     | GEO  |  |
| 3190 | CYorf15A  | GEO  |  |
| 3191 | CYorf15B  | GEO  |  |
| 3192 | CYP11A1   | GAD  |  |
| 3193 | CYP17A1   | GAD  |  |
| 3194 | CYP19A1   | GAD  |  |
| 3195 | CYP1A1    | Both |  |
| 3196 | CYP1A2    | GAD  |  |
| 3197 | CYP20A1   | GEO  |  |
| 3198 | CYP24A1   | Both |  |

|      |          |      |  |
|------|----------|------|--|
| 3199 | CYP27B1  | GAD  |  |
| 3200 | CYP2A13  | GEO  |  |
| 3201 | CYP2A6   | GAD  |  |
| 3202 | CYP2B6   | GEO  |  |
| 3203 | CYP2B7P1 | GEO  |  |
| 3204 | CYP2C18  | GEO  |  |
| 3205 | CYP2C19  | GAD  |  |
| 3206 | CYP2C8   | Both |  |
| 3207 | CYP2C9   | Both |  |
| 3208 | CYP2D6   | GAD  |  |
| 3209 | CYP2E1   | Both |  |
| 3210 | CYP2J2   | GEO  |  |
| 3211 | CYP2R1   | GEO  |  |
| 3212 | CYP2S1   | GEO  |  |
| 3213 | CYP2U1   | GEO  |  |
| 3214 | CYP2W1   | Both |  |
| 3215 | CYP3A4   | Both |  |
| 3216 | CYP3A5   | Both |  |
| 3217 | CYP4A11  | GEO  |  |
| 3218 | CYP4F12  | GEO  |  |
| 3219 | CYP4F2   | GEO  |  |
| 3220 | CYP4F22  | GEO  |  |
| 3221 | CYP4F3   | GEO  |  |
| 3222 | CYP4V2   | GEO  |  |
| 3223 | CYP4X1   | GEO  |  |
| 3224 | CYP7A1   | GAD  |  |
| 3225 | CYR61    | GEO  |  |
| 3226 | CYSLTR1  | GEO  |  |
| 3227 | CYTB     | GAD  |  |
| 3228 | CYTH2    | GEO  |  |
| 3229 | D2HGDH   | GEO  |  |
| 3230 | DAB2     | GEO  |  |
| 3231 | DACH     | GEO  |  |
| 3232 | DACH1    | GEO  |  |
| 3233 | DACT1    | Both |  |
| 3234 | DACT2    | GEO  |  |
| 3235 | DACT3    | GEO  |  |
| 3236 | DAG1     | Both |  |
| 3237 | DAO      | Both |  |
| 3238 | DAP      | GEO  |  |
| 3239 | DAPK2    | GEO  |  |
| 3240 | DARC     | GEO  |  |
| 3241 | DARS     | GEO  |  |
| 3242 | DARS2    | GEO  |  |
| 3243 | DAZAP1   | GEO  |  |
| 3244 | DBN1     | GEO  |  |
| 3245 | DBP      | GEO  |  |
| 3246 | DCAF13   | GEO  |  |
| 3247 | DCAF16   | GEO  |  |
| 3248 | DCAF6    | GEO  |  |

|      |         |      |  |
|------|---------|------|--|
| 3249 | DCAF8   | GEO  |  |
| 3250 | DCAKD   | GEO  |  |
| 3251 | DCC     | Both |  |
| 3252 | DCDC2   | GEO  |  |
| 3253 | DCLK2   | GEO  |  |
| 3254 | DCP1A   | GEO  |  |
| 3255 | DCP1B   | GEO  |  |
| 3256 | DCTD    | GEO  |  |
| 3257 | DCTN3   | GEO  |  |
| 3258 | DCTN5   | Both |  |
| 3259 | DCTN6   | GEO  |  |
| 3260 | DCUN1D1 | GEO  |  |
| 3261 | DCUN1D4 | GEO  |  |
| 3262 | DCUN1D5 | GEO  |  |
| 3263 | DDA1    | GEO  |  |
| 3264 | DDA3    | GEO  |  |
| 3265 | DDB2    | GEO  |  |
| 3266 | DDC     | GEO  |  |
| 3267 | DDHD1   | GEO  |  |
| 3268 | DDIT4   | GEO  |  |
| 3269 | DDN     | GEO  |  |
| 3270 | DDOST   | GEO  |  |
| 3271 | DDX10   | GEO  |  |
| 3272 | DDX17   | GEO  |  |
| 3273 | DDX18   | GEO  |  |
| 3274 | DDX21   | GEO  |  |
| 3275 | DDX25   | GAD  |  |
| 3276 | DDX26B  | GEO  |  |
| 3277 | DDX27   | GEO  |  |
| 3278 | DDX31   | GEO  |  |
| 3279 | DDX3X   | GEO  |  |
| 3280 | DDX3Y   | GEO  |  |
| 3281 | DDX47   | GEO  |  |
| 3282 | DDX53   | GEO  |  |
| 3283 | DDX60   | GEO  |  |
| 3284 | DEDD2   | GEO  |  |
| 3285 | DEFA3   | GEO  |  |
| 3286 | DEFA5   | Both |  |
| 3287 | DEFA6   | GEO  |  |
| 3288 | DEFB1   | Both |  |
| 3289 | DEFB4   | GAD  |  |
| 3290 | DEGS1   | GEO  |  |
| 3291 | DENND1A | GEO  |  |
| 3292 | DENND1C | GEO  |  |
| 3293 | DENND2C | GEO  |  |
| 3294 | DENND3  | GEO  |  |
| 3295 | DENND5A | GEO  |  |
| 3296 | DENR    | GEO  |  |
| 3297 | DEPDC6  | GEO  |  |
| 3298 | DEXI    | GEO  |  |



|      |               |      |  |
|------|---------------|------|--|
| 3299 | DFNA5         | Both |  |
| 3300 | DGAT2         | GEO  |  |
| 3301 | DGCR10        | GEO  |  |
| 3302 | DGCR8         | GEO  |  |
| 3303 | DGKA          | GEO  |  |
| 3304 | DGKD          | GEO  |  |
| 3305 | DGKH          | GEO  |  |
| 3306 | DHCR7         | GEO  |  |
| 3307 | DHDPSL        | GEO  |  |
| 3308 | DHFR          | Both |  |
| 3309 | DHR11         | GEO  |  |
| 3310 | DHRS12        | GEO  |  |
| 3311 | DHRS2         | GEO  |  |
| 3312 | DHRS7         | GEO  |  |
| 3313 | DHRS7C        | GEO  |  |
| 3314 | DHX15         | GEO  |  |
| 3315 | DHX36         | GAD  |  |
| 3316 | DIAPH1        | GEO  |  |
| 3317 | DIAPH2        | GEO  |  |
| 3318 | DIAPH3        | GEO  |  |
| 3319 | DIMT1L        | GEO  |  |
| 3320 | DIO1          | GEO  |  |
| 3321 | DIO3-OS       | GEO  |  |
| 3322 | DIP2C         | GEO  |  |
| 3323 | DIRAS1        | GEO  |  |
| 3324 | DIRC1         | GEO  |  |
| 3325 | DIS3          | GEO  |  |
| 3326 | DISP2         | GEO  |  |
| 3327 | DIXDC1        | GEO  |  |
| 3328 | DKFZP434F142  | GEO  |  |
| 3329 | DKFZP434L187  | GEO  |  |
| 3330 | DKFZP564O0823 | GEO  |  |
| 3331 | DKK1          | GEO  |  |
| 3332 | DKK3          | Both |  |
| 3333 | DKK4          | GEO  |  |
| 3334 | DLC1          | GEO  |  |
| 3335 | DLD           | GAD  |  |
| 3336 | DLEU1         | GEO  |  |
| 3337 | DLEU2         | GEO  |  |
| 3338 | DLG1          | GEO  |  |
| 3339 | DLG3          | GEO  |  |
| 3340 | DLG4          | GEO  |  |
| 3341 | DLG5          | GAD  |  |
| 3342 | DLGAP4        | GEO  |  |
| 3343 | DLL1          | GEO  |  |
| 3344 | DLX1          | GEO  |  |
| 3345 | DLX2          | GEO  |  |
| 3346 | DLX4          | GEO  |  |
| 3347 | DMBT1         | Both |  |
| 3348 | DMBX1         | GEO  |  |

|      |          |     |  |
|------|----------|-----|--|
| 3349 | DMD      | GEO |  |
| 3350 | DMGDH    | GEO |  |
| 3351 | DMN      | GEO |  |
| 3352 | DMRT2    | GEO |  |
| 3353 | DMXL1    | GEO |  |
| 3354 | DNAH12   | GAD |  |
| 3355 | DNAH14   | GEO |  |
| 3356 | DNAI2    | GEO |  |
| 3357 | DNAJA1   | GEO |  |
| 3358 | DNAJA2   | GEO |  |
| 3359 | DNAJB1   | GEO |  |
| 3360 | DNAJB4   | GEO |  |
| 3361 | DNAJB6   | GEO |  |
| 3362 | DNAJB9   | GEO |  |
| 3363 | DNAJC12  | GEO |  |
| 3364 | DNAJC2   | GEO |  |
| 3365 | DNAJC24  | GEO |  |
| 3366 | DNAJC3   | GEO |  |
| 3367 | DNAJC4   | GEO |  |
| 3368 | DNAJC7   | GEO |  |
| 3369 | DNAL1    | GEO |  |
| 3370 | DNALI1   | GEO |  |
| 3371 | DNASE1   | GEO |  |
| 3372 | DNASE1L3 | GEO |  |
| 3373 | DNHD1    | GEO |  |
| 3374 | DNM1     | GEO |  |
| 3375 | DNM1L    | GEO |  |
| 3376 | DNMT1    | GAD |  |
| 3377 | DNMT3A   | GAD |  |
| 3378 | DNMT3B   | GAD |  |
| 3379 | DOC2BL   | GEO |  |
| 3380 | DOCK1    | GEO |  |
| 3381 | DOCK2    | GEO |  |
| 3382 | DOCK3    | GAD |  |
| 3383 | DOCK7    | GEO |  |
| 3384 | DOCK8    | GEO |  |
| 3385 | DOK1     | GEO |  |
| 3386 | DOK4     | GEO |  |
| 3387 | DOLPP1   | GEO |  |
| 3388 | DOPEY2   | GEO |  |
| 3389 | DPAGT1   | GEO |  |
| 3390 | DPEP2    | GEO |  |
| 3391 | DPF1     | GEO |  |
| 3392 | DPF3     | GEO |  |
| 3393 | DPH2     | GEO |  |
| 3394 | DPH3     | GEO |  |
| 3395 | DPH5     | GEO |  |
| 3396 | DPM1     | GEO |  |
| 3397 | DPP10    | GEO |  |
| 3398 | DPP4     | GEO |  |

|      |           |      |  |
|------|-----------|------|--|
| 3399 | DPP6      | GEO  |  |
| 3400 | DPP8      | GEO  |  |
| 3401 | DPT       | GEO  |  |
| 3402 | DPY19L2P2 | GEO  |  |
| 3403 | DPY30     | GEO  |  |
| 3404 | DPYD      | Both |  |
| 3405 | DPYS      | GAD  |  |
| 3406 | DPYSL3    | GEO  |  |
| 3407 | DPYSL4    | GEO  |  |
| 3408 | DQ515897  | GAD  |  |
| 3409 | DQX1      | GEO  |  |
| 3410 | DRAM      | GEO  |  |
| 3411 | DRAM1     | GEO  |  |
| 3412 | DRD1IP    | GEO  |  |
| 3413 | DRD2      | GAD  |  |
| 3414 | DRD3      | GAD  |  |
| 3415 | DRD4      | GAD  |  |
| 3416 | DSC3      | GEO  |  |
| 3417 | DSCAML1   | GEO  |  |
| 3418 | DSCR1L1   | GEO  |  |
| 3419 | DSEL      | GEO  |  |
| 3420 | DSG2      | GEO  |  |
| 3421 | DSG3      | GEO  |  |
| 3422 | DTL       | GEO  |  |
| 3423 | DTNB      | GEO  |  |
| 3424 | DTNBP1    | GEO  |  |
| 3425 | DTWD1     | GEO  |  |
| 3426 | DTX2      | GEO  |  |
| 3427 | DTX3L     | GEO  |  |
| 3428 | DTX4      | GEO  |  |
| 3429 | DUOX2     | GEO  |  |
| 3430 | DUOXA2    | GEO  |  |
| 3431 | DUS3L     | GEO  |  |
| 3432 | DUS4L     | GEO  |  |
| 3433 | DUSP1     | GEO  |  |
| 3434 | DUSP10    | GEO  |  |
| 3435 | DUSP13    | GEO  |  |
| 3436 | DUSP19    | GEO  |  |
| 3437 | DUSP21    | GEO  |  |
| 3438 | DUSP27    | GEO  |  |
| 3439 | DUSP4     | GEO  |  |
| 3440 | DUSP5     | GEO  |  |
| 3441 | DUSP6     | GEO  |  |
| 3442 | DUSP8     | GEO  |  |
| 3443 | DUSP9     | GEO  |  |
| 3444 | DUT       | GEO  |  |
| 3445 | DUXAP10   | GEO  |  |
| 3446 | DYNC1II   | GEO  |  |
| 3447 | DYNC2H1   | GEO  |  |
| 3448 | DYNLL1    | GEO  |  |

|      |         |      |  |
|------|---------|------|--|
| 3449 | DYNLRB1 | GEO  |  |
| 3450 | DYNLT1  | GEO  |  |
| 3451 | DYRK2   | GEO  |  |
| 3452 | DYRK3   | GEO  |  |
| 3453 | DYRK4   | GEO  |  |
| 3454 | DYX1C1  | GEO  |  |
| 3455 | DZIP1   | GEO  |  |
| 3456 | DZIP1L  | GEO  |  |
| 3457 | E2F1    | GEO  |  |
| 3458 | E2F2    | Both |  |
| 3459 | E2F3    | GEO  |  |
| 3460 | E2F5    | GEO  |  |
| 3461 | EBF1    | GEO  |  |
| 3462 | ECHDC2  | GEO  |  |
| 3463 | ECM1    | Both |  |
| 3464 | ECOP    | GEO  |  |
| 3465 | ECRP    | GEO  |  |
| 3466 | ECSCR   | GEO  |  |
| 3467 | EDAR    | GEO  |  |
| 3468 | EDARADD | GEO  |  |
| 3469 | EDEM1   | GEO  |  |
| 3470 | EDG2    | GEO  |  |
| 3471 | EDN1    | GEO  |  |
| 3472 | EDNRA   | GEO  |  |
| 3473 | EEF1A1  | GEO  |  |
| 3474 | EEF1D   | GEO  |  |
| 3475 | EEF1E1  | GEO  |  |
| 3476 | EEF2K   | GEO  |  |
| 3477 | EFCAB4B | GEO  |  |
| 3478 | EFCAB7  | GEO  |  |
| 3479 | EFEMP1  | Both |  |
| 3480 | EFHA1   | GEO  |  |
| 3481 | EFHA2   | GEO  |  |
| 3482 | EFHC2   | GEO  |  |
| 3483 | EFNA1   | GEO  |  |
| 3484 | EFNA3   | GEO  |  |
| 3485 | EFNB1   | GEO  |  |
| 3486 | EFNB3   | GEO  |  |
| 3487 | EFR3A   | GEO  |  |
| 3488 | EFS     | GEO  |  |
| 3489 | EFTUD1  | GEO  |  |
| 3490 | EGF     | GAD  |  |
| 3491 | EGFL7   | GEO  |  |
| 3492 | EGFLAM  | GEO  |  |
| 3493 | EGFR    | Both |  |
| 3494 | EGLN3   | GEO  |  |
| 3495 | EGR1    | GEO  |  |
| 3496 | EGR2    | GEO  |  |
| 3497 | EGR4    | GEO  |  |
| 3498 | EHBP1L1 | GEO  |  |

|      |          |     |  |
|------|----------|-----|--|
| 3499 | EHD1     | GEO |  |
| 3500 | EHD2     | GEO |  |
| 3501 | EHD4     | GEO |  |
| 3502 | EHHADH   | GEO |  |
| 3503 | EHMT1    | GAD |  |
| 3504 | EHMT2    | GAD |  |
| 3505 | EID1     | GEO |  |
| 3506 | EIF1     | GEO |  |
| 3507 | EIF1AX   | GEO |  |
| 3508 | EIF1AY   | GEO |  |
| 3509 | EIF1B    | GEO |  |
| 3510 | EIF2AK2  | GEO |  |
| 3511 | EIF2AK4  | GEO |  |
| 3512 | EIF2B1   | GEO |  |
| 3513 | EIF2S2   | GEO |  |
| 3514 | EIF3C    | GAD |  |
| 3515 | EIF3E    | GEO |  |
| 3516 | EIF3F    | GEO |  |
| 3517 | EIF3H    | GAD |  |
| 3518 | EIF3L    | GEO |  |
| 3519 | EIF4A1   | GEO |  |
| 3520 | EIF4B    | GEO |  |
| 3521 | EIF4E    | GEO |  |
| 3522 | EIF4E3   | GEO |  |
| 3523 | EIF4EBP1 | GEO |  |
| 3524 | EIF4EBP2 | GEO |  |
| 3525 | EIF4G1   | GEO |  |
| 3526 | EIF4G2   | GEO |  |
| 3527 | EIF4H    | GAD |  |
| 3528 | EIF5     | GEO |  |
| 3529 | EIF5B    | GEO |  |
| 3530 | ELAC1    | GEO |  |
| 3531 | ELANE    | GEO |  |
| 3532 | ELAVL1   | GEO |  |
| 3533 | ELF1     | GEO |  |
| 3534 | ELF2     | GEO |  |
| 3535 | ELF3     | GEO |  |
| 3536 | ELMOD2   | GEO |  |
| 3537 | ELOVL6   | GEO |  |
| 3538 | ELTD1    | GEO |  |
| 3539 | EMCN     | GEO |  |
| 3540 | EME2     | GEO |  |
| 3541 | EMID1    | GEO |  |
| 3542 | EMID2    | GEO |  |
| 3543 | EMILIN1  | GEO |  |
| 3544 | EML1     | GEO |  |
| 3545 | EML3     | GEO |  |
| 3546 | EML4     | GEO |  |
| 3547 | EML6     | GEO |  |
| 3548 | EMP3     | GEO |  |

|      |          |      |  |
|------|----------|------|--|
| 3549 | EMR2     | GEO  |  |
| 3550 | ENAH     | GEO  |  |
| 3551 | ENAM     | GEO  |  |
| 3552 | ENHO     | GEO  |  |
| 3553 | ENO3     | GEO  |  |
| 3554 | ENOSF1   | GEO  |  |
| 3555 | ENOX1    | GEO  |  |
| 3556 | ENPEP    | GEO  |  |
| 3557 | ENPP2    | GEO  |  |
| 3558 | ENPP3    | GEO  |  |
| 3559 | ENPP5    | GEO  |  |
| 3560 | ENPP6    | GEO  |  |
| 3561 | ENTPD3   | GEO  |  |
| 3562 | ENTPD4   | GEO  |  |
| 3563 | ENTPD6   | GEO  |  |
| 3564 | ENY2     | GEO  |  |
| 3565 | EPB41L2  | GEO  |  |
| 3566 | EPB41L4B | GEO  |  |
| 3567 | EPB41L5  | GEO  |  |
| 3568 | EPB49    | GEO  |  |
| 3569 | EPCAM    | GEO  |  |
| 3570 | EPHA1    | GEO  |  |
| 3571 | EPHA10   | GEO  |  |
| 3572 | EPHA3    | GEO  |  |
| 3573 | EPHA4    | GEO  |  |
| 3574 | EPHA7    | GEO  |  |
| 3575 | EPHB3    | GEO  |  |
| 3576 | EPHX1    | GAD  |  |
| 3577 | EPN3     | GEO  |  |
| 3578 | EPOR     | GEO  |  |
| 3579 | EPPK1    | GEO  |  |
| 3580 | EPS15    | GEO  |  |
| 3581 | EPS8     | GEO  |  |
| 3582 | EPS8L2   | GEO  |  |
| 3583 | EPS8L3   | GEO  |  |
| 3584 | EPSTI1   | GEO  |  |
| 3585 | ERBB2IP  | GEO  |  |
| 3586 | ERBB3    | GAD  |  |
| 3587 | ERBB4    | Both |  |
| 3588 | ERCC1    | Both |  |
| 3589 | ERCC2    | GAD  |  |
| 3590 | ERCC3    | GAD  |  |
| 3591 | ERCC4    | GAD  |  |
| 3592 | ERCC5    | GAD  |  |
| 3593 | ERCC6    | Both |  |
| 3594 | ERG      | GEO  |  |
| 3595 | ERGIC1   | GEO  |  |
| 3596 | ERGIC3   | GEO  |  |
| 3597 | ERI1     | GEO  |  |
| 3598 | ERICH1   | GEO  |  |

|      |        |      |  |
|------|--------|------|--|
| 3599 | ERN2   | GEO  |  |
| 3600 | ERO1L  | GEO  |  |
| 3601 | ERRF11 | GEO  |  |
| 3602 | ESAM   | GEO  |  |
| 3603 | ESCO1  | GEO  |  |
| 3604 | ESF1   | GEO  |  |
| 3605 | ESPL1  | GEO  |  |
| 3606 | ESPN   | GEO  |  |
| 3607 | ESPNP  | GEO  |  |
| 3608 | ESR1   | Both |  |
| 3609 | ESR2   | GAD  |  |
| 3610 | ESRP1  | GEO  |  |
| 3611 | ESRRA  | GEO  |  |
| 3612 | ESRRG  | GAD  |  |
| 3613 | ESYT2  | GEO  |  |
| 3614 | ETF1   | GEO  |  |
| 3615 | ETFA   | GEO  |  |
| 3616 | ETNK2  | GEO  |  |
| 3617 | ETS1   | GEO  |  |
| 3618 | ETV6   | GEO  |  |
| 3619 | ETV7   | GEO  |  |
| 3620 | EVL    | GEO  |  |
| 3621 | EVPL   | GEO  |  |
| 3622 | EVX1   | GEO  |  |
| 3623 | EXD3   | GEO  |  |
| 3624 | EXDL2  | GEO  |  |
| 3625 | EXO1   | GAD  |  |
| 3626 | EXOC1  | GEO  |  |
| 3627 | EXOC2  | GAD  |  |
| 3628 | EXOC3  | GEO  |  |
| 3629 | EXOC5  | GEO  |  |
| 3630 | EXOC6B | GEO  |  |
| 3631 | EXOG   | GEO  |  |
| 3632 | EXOSC1 | GEO  |  |
| 3633 | EXOSC4 | GEO  |  |
| 3634 | EXOSC8 | GEO  |  |
| 3635 | EXPH5  | GEO  |  |
| 3636 | EXT1   | GEO  |  |
| 3637 | EYA1   | GEO  |  |
| 3638 | EYA2   | GEO  |  |
| 3639 | EYA3   | GEO  |  |
| 3640 | EYA4   | GEO  |  |
| 3641 | F11    | GEO  |  |
| 3642 | F11R   | GEO  |  |
| 3643 | F13B   | GAD  |  |
| 3644 | F2     | Both |  |
| 3645 | F2R    | GEO  |  |
| 3646 | F2RL1  | GEO  |  |
| 3647 | F2RL2  | GEO  |  |
| 3648 | F5     | Both |  |

|      |          |     |  |
|------|----------|-----|--|
| 3649 | F7       | GEO |  |
| 3650 | F8       | GEO |  |
| 3651 | FA2H     | GEO |  |
| 3652 | FAAH     | GAD |  |
| 3653 | FABP2    | GAD |  |
| 3654 | FADS2    | GEO |  |
| 3655 | FADS3    | GEO |  |
| 3656 | FAF1     | GAD |  |
| 3657 | FAIM     | GEO |  |
| 3658 | FAIM2    | GEO |  |
| 3659 | FAIM3    | GEO |  |
| 3660 | FAM102B  | GEO |  |
| 3661 | FAM105A  | GEO |  |
| 3662 | FAM107B  | GEO |  |
| 3663 | FAM108C1 | GEO |  |
| 3664 | FAM110A  | GEO |  |
| 3665 | FAM110B  | GEO |  |
| 3666 | FAM111A  | GEO |  |
| 3667 | FAM113B  | GEO |  |
| 3668 | FAM114A1 | GEO |  |
| 3669 | FAM116A  | GEO |  |
| 3670 | FAM119A  | GEO |  |
| 3671 | FAM120A  | GEO |  |
| 3672 | FAM120B  | GEO |  |
| 3673 | FAM122C  | GEO |  |
| 3674 | FAM123A  | GEO |  |
| 3675 | FAM124A  | GEO |  |
| 3676 | FAM125A  | GEO |  |
| 3677 | FAM126B  | GEO |  |
| 3678 | FAM127A  | GEO |  |
| 3679 | FAM129A  | GEO |  |
| 3680 | FAM131A  | GEO |  |
| 3681 | FAM131C  | GEO |  |
| 3682 | FAM132A  | GEO |  |
| 3683 | FAM134B  | GEO |  |
| 3684 | FAM13A   | GEO |  |
| 3685 | FAM13C   | GEO |  |
| 3686 | FAM14A   | GEO |  |
| 3687 | FAM150B  | GEO |  |
| 3688 | FAM151A  | GEO |  |
| 3689 | FAM156A  | GEO |  |
| 3690 | FAM160A1 | GEO |  |
| 3691 | FAM161B  | GEO |  |
| 3692 | FAM162A  | GEO |  |
| 3693 | FAM167A  | GEO |  |
| 3694 | FAM169A  | GEO |  |
| 3695 | FAM173B  | GEO |  |
| 3696 | FAM176A  | GEO |  |
| 3697 | FAM179B  | GEO |  |
| 3698 | FAM184B  | GEO |  |

|      |          |     |  |
|------|----------|-----|--|
| 3699 | FAM189A1 | GEO |  |
| 3700 | FAM189A2 | GEO |  |
| 3701 | FAM195A  | GEO |  |
| 3702 | FAM195B  | GEO |  |
| 3703 | FAM198B  | GEO |  |
| 3704 | FAM19A1  | GEO |  |
| 3705 | FAM19A2  | GEO |  |
| 3706 | FAM200A  | GEO |  |
| 3707 | FAM20A   | GEO |  |
| 3708 | FAM26D   | GEO |  |
| 3709 | FAM29A   | GEO |  |
| 3710 | FAM38A   | GEO |  |
| 3711 | FAM38B   | GEO |  |
| 3712 | FAM3A    | GEO |  |
| 3713 | FAM3B    | GEO |  |
| 3714 | FAM3D    | GEO |  |
| 3715 | FAM40B   | GEO |  |
| 3716 | FAM41C   | GEO |  |
| 3717 | FAM43A   | GEO |  |
| 3718 | FAM44B   | GEO |  |
| 3719 | FAM46A   | GAD |  |
| 3720 | FAM48A   | GEO |  |
| 3721 | FAM49B   | GEO |  |
| 3722 | FAM50A   | GEO |  |
| 3723 | FAM50B   | GEO |  |
| 3724 | FAM55A   | GEO |  |
| 3725 | FAM55C   | GEO |  |
| 3726 | FAM57A   | GEO |  |
| 3727 | FAM5C    | GEO |  |
| 3728 | FAM60A   | GEO |  |
| 3729 | FAM62B   | GEO |  |
| 3730 | FAM65B   | GEO |  |
| 3731 | FAM69A   | GEO |  |
| 3732 | FAM69B   | GEO |  |
| 3733 | FAM71F2  | GEO |  |
| 3734 | FAM73B   | GEO |  |
| 3735 | FAM78A   | GEO |  |
| 3736 | FAM7A1   | GEO |  |
| 3737 | FAM7A3   | GEO |  |
| 3738 | FAM82A   | GEO |  |
| 3739 | FAM83D   | GEO |  |
| 3740 | FAM83E   | GEO |  |
| 3741 | FAM83F   | GEO |  |
| 3742 | FAM83H   | GEO |  |
| 3743 | FAM84A   | GEO |  |
| 3744 | FAM84B   | GEO |  |
| 3745 | FAM89A   | GEO |  |
| 3746 | FAM89B   | GEO |  |
| 3747 | FAM91A2  | GEO |  |
| 3748 | FAM92B   | GAD |  |

|      |         |      |  |
|------|---------|------|--|
| 3749 | FAM95B1 | GEO  |  |
| 3750 | FAM98B  | GEO  |  |
| 3751 | FANCA   | GEO  |  |
| 3752 | FANCB   | GEO  |  |
| 3753 | FANCD2  | GAD  |  |
| 3754 | FANCG   | Both |  |
| 3755 | FANCI   | GEO  |  |
| 3756 | FANCL   | GEO  |  |
| 3757 | FAR2    | GEO  |  |
| 3758 | FARP1   | GEO  |  |
| 3759 | FARP2   | GEO  |  |
| 3760 | FARSB   | GEO  |  |
| 3761 | FAS     | Both |  |
| 3762 | FASLG   | GAD  |  |
| 3763 | FASN    | GEO  |  |
| 3764 | FASTKD3 | GEO  |  |
| 3765 | FBLIM1  | GEO  |  |
| 3766 | FBLN2   | GEO  |  |
| 3767 | FBLN5   | GEO  |  |
| 3768 | FBN1    | GEO  |  |
| 3769 | FBRS    | GEO  |  |
| 3770 | FBXL11  | GEO  |  |
| 3771 | FBXL13  | GEO  |  |
| 3772 | FBXL14  | GEO  |  |
| 3773 | FBXL2   | GEO  |  |
| 3774 | FBXO11  | GEO  |  |
| 3775 | FBXO16  | GEO  |  |
| 3776 | FBXO17  | GEO  |  |
| 3777 | FBXO2   | GEO  |  |
| 3778 | FBXO27  | GEO  |  |
| 3779 | FBXO3   | GEO  |  |
| 3780 | FBXO32  | GEO  |  |
| 3781 | FBXO38  | GAD  |  |
| 3782 | FBXO44  | GEO  |  |
| 3783 | FBXO46  | GEO  |  |
| 3784 | FBXO8   | GEO  |  |
| 3785 | FBXW2   | GEO  |  |
| 3786 | FCAR    | GEO  |  |
| 3787 | FCER1A  | Both |  |
| 3788 | FCER1G  | GEO  |  |
| 3789 | FCF1    | GEO  |  |
| 3790 | FCGR1A  | GAD  |  |
| 3791 | FCGR2A  | Both |  |
| 3792 | FCGR2C  | GAD  |  |
| 3793 | FCGR3A  | GAD  |  |
| 3794 | FCGR3B  | GEO  |  |
| 3795 | FCGRT   | GEO  |  |
| 3796 | FCHSD1  | GEO  |  |
| 3797 | FCN3    | GEO  |  |
| 3798 | FCRL2   | GEO  |  |

|      |          |      |  |
|------|----------|------|--|
| 3799 | FCRL3    | GAD  |  |
| 3800 | FDFT1    | GEO  |  |
| 3801 | FEM1B    | GEO  |  |
| 3802 | FER      | GEO  |  |
| 3803 | FER1L4   | GEO  |  |
| 3804 | FGA      | GEO  |  |
| 3805 | FGB      | Both |  |
| 3806 | FGD2     | GEO  |  |
| 3807 | FGD4     | GEO  |  |
| 3808 | FGD6     | GEO  |  |
| 3809 | FGF10    | GEO  |  |
| 3810 | FGF3     | GEO  |  |
| 3811 | FGF4     | GAD  |  |
| 3812 | FGF7     | GEO  |  |
| 3813 | FGF9     | GEO  |  |
| 3814 | FGFBP1   | GEO  |  |
| 3815 | FGFR1    | GEO  |  |
| 3816 | FGFR1OP  | GAD  |  |
| 3817 | FGFR3    | GEO  |  |
| 3818 | FGFR4    | Both |  |
| 3819 | FGFRL1   | GEO  |  |
| 3820 | FGG      | GEO  |  |
| 3821 | FGGY     | GEO  |  |
| 3822 | FGL1     | GEO  |  |
| 3823 | FH       | GEO  |  |
| 3824 | FHIT     | GAD  |  |
| 3825 | FHOD3    | GEO  |  |
| 3826 | FIBCD1   | GEO  |  |
| 3827 | FIG4     | GEO  |  |
| 3828 | FIGN     | GEO  |  |
| 3829 | FJX1     | GEO  |  |
| 3830 | FKBP11   | GEO  |  |
| 3831 | FKBP1A   | GEO  |  |
| 3832 | FKBP3    | GEO  |  |
| 3833 | FKBP4    | GEO  |  |
| 3834 | FKBP5    | GEO  |  |
| 3835 | FKSG30   | GEO  |  |
| 3836 | FKSG49   | GEO  |  |
| 3837 | FLG      | GAD  |  |
| 3838 | FLI1     | GEO  |  |
| 3839 | FLJ10357 | GEO  |  |
| 3840 | FLJ10404 | GEO  |  |
| 3841 | FLJ10826 | GEO  |  |
| 3842 | FLJ10945 | GEO  |  |
| 3843 | FLJ11017 | GEO  |  |
| 3844 | FLJ11151 | GEO  |  |
| 3845 | FLJ12610 | GEO  |  |
| 3846 | FLJ13391 | GEO  |  |
| 3847 | FLJ13744 | GEO  |  |
| 3848 | FLJ14186 | GEO  |  |

|      |          |      |  |
|------|----------|------|--|
| 3849 | FLJ14213 | GEO  |  |
| 3850 | FLJ14981 | GEO  |  |
| 3851 | FLJ20152 | GEO  |  |
| 3852 | FLJ20184 | GEO  |  |
| 3853 | FLJ20273 | GEO  |  |
| 3854 | FLJ20489 | GEO  |  |
| 3855 | FLJ20647 | GEO  |  |
| 3856 | FLJ22167 | GEO  |  |
| 3857 | FLJ22763 | GEO  |  |
| 3858 | FLJ23867 | GEO  |  |
| 3859 | FLJ27352 | GEO  |  |
| 3860 | FLJ30901 | GEO  |  |
| 3861 | FLJ31306 | GEO  |  |
| 3862 | FLJ32679 | GEO  |  |
| 3863 | FLJ33996 | GEO  |  |
| 3864 | FLJ34515 | GEO  |  |
| 3865 | FLJ34969 | GEO  |  |
| 3866 | FLJ35700 | GEO  |  |
| 3867 | FLJ35776 | GEO  |  |
| 3868 | FLJ36031 | GEO  |  |
| 3869 | FLJ36840 | GEO  |  |
| 3870 | FLJ37464 | GEO  |  |
| 3871 | FLJ37644 | GEO  |  |
| 3872 | FLJ38379 | GEO  |  |
| 3873 | FLJ40113 | GEO  |  |
| 3874 | FLJ40292 | GEO  |  |
| 3875 | FLJ41603 | GEO  |  |
| 3876 | FLJ41757 | GEO  |  |
| 3877 | FLJ43276 | GEO  |  |
| 3878 | FLJ43855 | GEO  |  |
| 3879 | FLJ45139 | GAD  |  |
| 3880 | FLJ45340 | GEO  |  |
| 3881 | FLJ45445 | GEO  |  |
| 3882 | FLJ45803 | Both |  |
| 3883 | FLJ45949 | GEO  |  |
| 3884 | FLNA     | GEO  |  |
| 3885 | FLNB     | GEO  |  |
| 3886 | FLNC     | GEO  |  |
| 3887 | FLOT1    | GEO  |  |
| 3888 | FLRT2    | GEO  |  |
| 3889 | FLRT3    | GEO  |  |
| 3890 | FLT1     | GAD  |  |
| 3891 | FLT3LG   | GEO  |  |
| 3892 | FMN2     | GEO  |  |
| 3893 | FMNL2    | GEO  |  |
| 3894 | FMO1     | GEO  |  |
| 3895 | FMO3     | Both |  |
| 3896 | FMO4     | GEO  |  |
| 3897 | FMO5     | GEO  |  |
| 3898 | FN3K     | GEO  |  |

|      |         |      |  |
|------|---------|------|--|
| 3899 | FNBP4   | GEO  |  |
| 3900 | FNDC3A  | GEO  |  |
| 3901 | FNDC3B  | GEO  |  |
| 3902 | FNDC4   | GEO  |  |
| 3903 | FOLH1   | GAD  |  |
| 3904 | FOLR1   | Both |  |
| 3905 | FOLR2   | GEO  |  |
| 3906 | FOS     | GEO  |  |
| 3907 | FOSB    | GEO  |  |
| 3908 | FOSL1   | GEO  |  |
| 3909 | FOSL2   | GEO  |  |
| 3910 | FOXA3   | GEO  |  |
| 3911 | FOXC1   | GEO  |  |
| 3912 | FOXC2   | GEO  |  |
| 3913 | FOXD1   | GEO  |  |
| 3914 | FOXD2   | GEO  |  |
| 3915 | FOXD3   | GEO  |  |
| 3916 | FOXJ3   | GEO  |  |
| 3917 | FOXL2   | GEO  |  |
| 3918 | FOXN2   | GEO  |  |
| 3919 | FOXN3   | GEO  |  |
| 3920 | FOXO1A  | GEO  |  |
| 3921 | FOXP2   | GEO  |  |
| 3922 | FOXRED2 | GEO  |  |
| 3923 | FPGS    | GAD  |  |
| 3924 | FPR1    | GEO  |  |
| 3925 | FPRL1   | GEO  |  |
| 3926 | FRAP1   | GAD  |  |
| 3927 | FRAS1   | GEO  |  |
| 3928 | FRAT2   | GEO  |  |
| 3929 | FREM1   | GEO  |  |
| 3930 | FRG1    | GEO  |  |
| 3931 | FRG1B   | GEO  |  |
| 3932 | FRK     | GEO  |  |
| 3933 | FRMD1   | GEO  |  |
| 3934 | FRMD3   | GEO  |  |
| 3935 | FRMD4A  | GEO  |  |
| 3936 | FRYL    | GEO  |  |
| 3937 | FSIP2   | GEO  |  |
| 3938 | FST     | GEO  |  |
| 3939 | FSTL1   | GEO  |  |
| 3940 | FSTL3   | GEO  |  |
| 3941 | FSTL5   | GEO  |  |
| 3942 | FTCD    | GEO  |  |
| 3943 | FTL     | GEO  |  |
| 3944 | FUBP1   | GEO  |  |
| 3945 | FUCA1   | GEO  |  |
| 3946 | FUNDC1  | GEO  |  |
| 3947 | FURIN   | Both |  |
| 3948 | FUT10   | GEO  |  |

|      |           |      |  |
|------|-----------|------|--|
| 3949 | FUT2      | Both |  |
| 3950 | FUT3      | GEO  |  |
| 3951 | FUT4      | GEO  |  |
| 3952 | FUT6      | GEO  |  |
| 3953 | FXR1      | GEO  |  |
| 3954 | FXVD2     | GEO  |  |
| 3955 | FY        | GAD  |  |
| 3956 | FYB       | GEO  |  |
| 3957 | FYCO1     | GEO  |  |
| 3958 | FZD3      | GEO  |  |
| 3959 | FZD8      | GEO  |  |
| 3960 | G0S2      | GEO  |  |
| 3961 | GABARAPL1 | GEO  |  |
| 3962 | GABPB1    | GEO  |  |
| 3963 | GABRA2    | GEO  |  |
| 3964 | GABRB2    | GEO  |  |
| 3965 | GAD1      | GEO  |  |
| 3966 | GADD45A   | Both |  |
| 3967 | GAGE1     | GEO  |  |
| 3968 | GAGE12F   | GEO  |  |
| 3969 | GAL       | GEO  |  |
| 3970 | GAL3ST1   | GEO  |  |
| 3971 | GALIG     | GEO  |  |
| 3972 | GALK2     | GEO  |  |
| 3973 | GALM      | GEO  |  |
| 3974 | GALNT1    | GEO  |  |
| 3975 | GALNT14   | GEO  |  |
| 3976 | GALNT4    | GEO  |  |
| 3977 | GALR2     | GEO  |  |
| 3978 | GAN       | GEO  |  |
| 3979 | GAP43     | GEO  |  |
| 3980 | GAPDH     | GEO  |  |
| 3981 | GAPVD1    | GEO  |  |
| 3982 | GAR1      | GEO  |  |
| 3983 | GAS1      | GEO  |  |
| 3984 | GAS5      | GEO  |  |
| 3985 | GAST      | GEO  |  |
| 3986 | GATA2     | GEO  |  |
| 3987 | GATA3     | GEO  |  |
| 3988 | GATA6     | GAD  |  |
| 3989 | GATAD2A   | GEO  |  |
| 3990 | GATM      | GEO  |  |
| 3991 | GBA       | GEO  |  |
| 3992 | GBA2      | GEO  |  |
| 3993 | GBA3      | GEO  |  |
| 3994 | GBAS      | GEO  |  |
| 3995 | GBE1      | GEO  |  |
| 3996 | GBGT1     | GEO  |  |
| 3997 | GBP1      | GEO  |  |
| 3998 | GBP2      | GEO  |  |

|      |        |      |  |
|------|--------|------|--|
| 3999 | GBP4   | GEO  |  |
| 4000 | GC     | GEO  |  |
| 4001 | GCA    | GEO  |  |
| 4002 | GCAT   | GEO  |  |
| 4003 | GCC2   | GEO  |  |
| 4004 | GCFC1  | GEO  |  |
| 4005 | GCKR   | GAD  |  |
| 4006 | GCLM   | GEO  |  |
| 4007 | GCN1L1 | GEO  |  |
| 4008 | GCOM1  | GEO  |  |
| 4009 | GDA    | GEO  |  |
| 4010 | GDAP1  | GEO  |  |
| 4011 | GDE1   | GEO  |  |
| 4012 | GDF11  | GEO  |  |
| 4013 | GDI1   | GEO  |  |
| 4014 | GEFT   | GEO  |  |
| 4015 | GEMIN5 | GEO  |  |
| 4016 | GET4   | GEO  |  |
| 4017 | GFI1   | GEO  |  |
| 4018 | GFOD1  | GEO  |  |
| 4019 | GFPT1  | GEO  |  |
| 4020 | GFPT2  | GEO  |  |
| 4021 | GFRA1  | GEO  |  |
| 4022 | GGA1   | GEO  |  |
| 4023 | GGA2   | GEO  |  |
| 4024 | GGA3   | GEO  |  |
| 4025 | GGCT   | GEO  |  |
| 4026 | GGCX   | GEO  |  |
| 4027 | GGH    | Both |  |
| 4028 | GGT2   | GEO  |  |
| 4029 | GGT3P  | GEO  |  |
| 4030 | GGT5   | GEO  |  |
| 4031 | GGT6   | GEO  |  |
| 4032 | GGT7   | GEO  |  |
| 4033 | GGT8P  | GEO  |  |
| 4034 | GGTLA1 | GEO  |  |
| 4035 | GH1    | Both |  |
| 4036 | GHR    | GEO  |  |
| 4037 | GHRL   | GAD  |  |
| 4038 | GHSR   | Both |  |
| 4039 | GIF    | GAD  |  |
| 4040 | GIMAP2 | GEO  |  |
| 4041 | GIMAP4 | GEO  |  |
| 4042 | GIMAP5 | GEO  |  |
| 4043 | GIMAP7 | GEO  |  |
| 4044 | GIMAP8 | GEO  |  |
| 4045 | GINS2  | GEO  |  |
| 4046 | GIPC1  | GEO  |  |
| 4047 | GIPR   | GEO  |  |
| 4048 | GIT2   | GEO  |  |

|      |         |      |  |
|------|---------|------|--|
| 4049 | GIYD2   | GEO  |  |
| 4050 | GJA1    | GEO  |  |
| 4051 | GJB2    | GEO  |  |
| 4052 | GJB3    | GEO  |  |
| 4053 | GJB4    | GEO  |  |
| 4054 | GJB5    | GEO  |  |
| 4055 | GJB6    | GEO  |  |
| 4056 | GJC1    | GEO  |  |
| 4057 | GK      | GEO  |  |
| 4058 | GLA     | GEO  |  |
| 4059 | GLCCI1  | GEO  |  |
| 4060 | GLCE    | GEO  |  |
| 4061 | GLDN    | GEO  |  |
| 4062 | GLG1    | GEO  |  |
| 4063 | GLI1    | Both |  |
| 4064 | GLI2    | GEO  |  |
| 4065 | GLI3    | Both |  |
| 4066 | GLIPR1  | GEO  |  |
| 4067 | GLIPR2  | GEO  |  |
| 4068 | GLIS3   | GEO  |  |
| 4069 | GLMN    | GEO  |  |
| 4070 | GLOD5   | GEO  |  |
| 4071 | GLP1R   | GEO  |  |
| 4072 | GLRA2   | GEO  |  |
| 4073 | GLRX    | GEO  |  |
| 4074 | GLRX3   | GEO  |  |
| 4075 | GLT8D1  | GEO  |  |
| 4076 | GLUD1   | GEO  |  |
| 4077 | GLUL    | GEO  |  |
| 4078 | GLYATL1 | GEO  |  |
| 4079 | GMPPB   | GAD  |  |
| 4080 | GMPR    | GEO  |  |
| 4081 | GNAI1   | GEO  |  |
| 4082 | GNAL    | GEO  |  |
| 4083 | GNAO1   | GEO  |  |
| 4084 | GNAQ    | GEO  |  |
| 4085 | GNB1    | GEO  |  |
| 4086 | GNB1L   | GEO  |  |
| 4087 | GNB3    | GEO  |  |
| 4088 | GNE     | GEO  |  |
| 4089 | GNG11   | GEO  |  |
| 4090 | GNG13   | GEO  |  |
| 4091 | GNL3    | GEO  |  |
| 4092 | GNLY    | GEO  |  |
| 4093 | GNPAT   | GEO  |  |
| 4094 | GNPDA2  | GEO  |  |
| 4095 | GOLGA2B | GEO  |  |
| 4096 | GOLGA6  | GEO  |  |
| 4097 | GOLGA8E | GEO  |  |
| 4098 | GOLGA9P | GEO  |  |



|      |         |     |  |
|------|---------|-----|--|
| 4099 | GOLPH2  | GEO |  |
| 4100 | GOLT1B  | GEO |  |
| 4101 | GON4L   | GEO |  |
| 4102 | GORASP1 | GEO |  |
| 4103 | GP9     | GEO |  |
| 4104 | GPAM    | GEO |  |
| 4105 | GPAT2   | GEO |  |
| 4106 | GPATCH2 | GEO |  |
| 4107 | GPATCH4 | GEO |  |
| 4108 | GPBAR1  | GAD |  |
| 4109 | GPC3    | GEO |  |
| 4110 | GPC5    | GAD |  |
| 4111 | GPD2    | GEO |  |
| 4112 | GPHA2   | GEO |  |
| 4113 | GPLD1   | GEO |  |
| 4114 | GPM6A   | GEO |  |
| 4115 | GPR107  | GEO |  |
| 4116 | GPR109B | GEO |  |
| 4117 | GPR110  | GEO |  |
| 4118 | GPR112  | GEO |  |
| 4119 | GPR120  | GEO |  |
| 4120 | GPR124  | GEO |  |
| 4121 | GPR125  | GEO |  |
| 4122 | GPR126  | GEO |  |
| 4123 | GPR128  | GEO |  |
| 4124 | GPR132  | GEO |  |
| 4125 | GPR135  | GEO |  |
| 4126 | GPR143  | GEO |  |
| 4127 | GPR153  | GEO |  |
| 4128 | GPR155  | GEO |  |
| 4129 | GPR156  | GEO |  |
| 4130 | GPR161  | GEO |  |
| 4131 | GPR17   | GEO |  |
| 4132 | GPR172A | GEO |  |
| 4133 | GPR172B | GEO |  |
| 4134 | GPR177  | GEO |  |
| 4135 | GPR27   | GEO |  |
| 4136 | GPR30   | GEO |  |
| 4137 | GPR34   | GEO |  |
| 4138 | GPR37   | GEO |  |
| 4139 | GPR39   | GEO |  |
| 4140 | GPR44   | GEO |  |
| 4141 | GPR82   | GEO |  |
| 4142 | GPR89A  | GEO |  |
| 4143 | GPR98   | GEO |  |
| 4144 | GPRASP2 | GEO |  |
| 4145 | GPRC5B  | GEO |  |
| 4146 | GPRC5C  | GEO |  |
| 4147 | GPRC5D  | GEO |  |
| 4148 | GPS2    | GEO |  |

|      |           |      |  |
|------|-----------|------|--|
| 4149 | GPSM1     | GEO  |  |
| 4150 | GPSM2     | GEO  |  |
| 4151 | GPT2      | GEO  |  |
| 4152 | GPX1      | Both |  |
| 4153 | GPX4      | GAD  |  |
| 4154 | GPX8      | GEO  |  |
| 4155 | GRAMD1C   | GEO  |  |
| 4156 | GRASP     | GEO  |  |
| 4157 | GREB1     | GEO  |  |
| 4158 | GREM1     | Both |  |
| 4159 | GRHL2     | GEO  |  |
| 4160 | GRHPR     | GEO  |  |
| 4161 | GRIA3     | GEO  |  |
| 4162 | GRIA4     | GEO  |  |
| 4163 | GRIK2     | GEO  |  |
| 4164 | GRIK4     | GEO  |  |
| 4165 | GRIN1     | GEO  |  |
| 4166 | GRIN2A    | GEO  |  |
| 4167 | GRIN2D    | GEO  |  |
| 4168 | GRINA     | GEO  |  |
| 4169 | GRLF1     | GEO  |  |
| 4170 | GRM8      | GEO  |  |
| 4171 | GSDMB     | Both |  |
| 4172 | GSDML     | GAD  |  |
| 4173 | GSG1L     | GEO  |  |
| 4174 | GSPT1     | GEO  |  |
| 4175 | GSR       | GEO  |  |
| 4176 | GSTA1     | GAD  |  |
| 4177 | GSTA2     | GAD  |  |
| 4178 | GSTA4     | GAD  |  |
| 4179 | GSTK1     | GEO  |  |
| 4180 | GSTM1     | GAD  |  |
| 4181 | GSTM2     | Both |  |
| 4182 | GSTM3     | Both |  |
| 4183 | GSTO1     | Both |  |
| 4184 | GSTO2     | GAD  |  |
| 4185 | GSTP1     | GAD  |  |
| 4186 | GSTT1     | Both |  |
| 4187 | GSTT2     | GAD  |  |
| 4188 | GTF2B     | GEO  |  |
| 4189 | GTF2E2    | GAD  |  |
| 4190 | GTF2F2    | GEO  |  |
| 4191 | GTF2H1    | GEO  |  |
| 4192 | GTF2H2    | GEO  |  |
| 4193 | GTF2H2D   | GEO  |  |
| 4194 | GTF2I     | GEO  |  |
| 4195 | GTF2IRD2  | GEO  |  |
| 4196 | GTF2IRD2B | GEO  |  |
| 4197 | GTPBP1    | GEO  |  |
| 4198 | GTPBP3    | GEO  |  |

|      |             |     |  |
|------|-------------|-----|--|
| 4199 | GTPBP4      | GEO |  |
| 4200 | GTPBP5      | GEO |  |
| 4201 | GTPBP6      | GEO |  |
| 4202 | GTSF1       | GEO |  |
| 4203 | GTSF1L      | GEO |  |
| 4204 | GUCA1B      | GEO |  |
| 4205 | GUCY1A3     | GEO |  |
| 4206 | GUCY1B2     | GEO |  |
| 4207 | GUCY1B3     | GEO |  |
| 4208 | GUCY2C      | GEO |  |
| 4209 | GUK1        | GEO |  |
| 4210 | GUSB        | GEO |  |
| 4211 | GUSBP3      | GEO |  |
| 4212 | GXYLT2      | GEO |  |
| 4213 | GYG1        | GEO |  |
| 4214 | GYG2        | GEO |  |
| 4215 | GYLTL1B     | GEO |  |
| 4216 | GYPA        | GAD |  |
| 4217 | GYPC        | GEO |  |
| 4218 | GZMK        | GEO |  |
| 4219 | H19         | GEO |  |
| 4220 | H1FX        | GEO |  |
| 4221 | H2AFX       | GEO |  |
| 4222 | H2AFY       | GEO |  |
| 4223 | H2BFS       | GEO |  |
| 4224 | H3F3B       | GEO |  |
| 4225 | HABP4       | GAD |  |
| 4226 | HACE1       | GEO |  |
| 4227 | HADH        | GEO |  |
| 4228 | HAMP        | GEO |  |
| 4229 | HAND1       | GEO |  |
| 4230 | HAPLN2      | GEO |  |
| 4231 | HAS1        | GEO |  |
| 4232 | HAUS4       | GEO |  |
| 4233 | HAUS7       | GEO |  |
| 4234 | HAVCR1      | GEO |  |
| 4235 | HAVCR2      | GEO |  |
| 4236 | HBB         | GEO |  |
| 4237 | HBE1        | GEO |  |
| 4238 | HBEGF       | GEO |  |
| 4239 | HBG1        | GEO |  |
| 4240 | HBG2        | GEO |  |
| 4241 | HCCS        | GEO |  |
| 4242 | hCG_1776259 | GEO |  |
| 4243 | hCG_1783494 | GEO |  |
| 4244 | hCG_1981531 | GEO |  |
| 4245 | HCG4        | GEO |  |
| 4246 | HCG8        | GEO |  |
| 4247 | HCLS1       | GEO |  |
| 4248 | HCP5        | GEO |  |

|      |           |      |  |
|------|-----------|------|--|
| 4249 | HDAC2     | GEO  |  |
| 4250 | HDAC4     | GEO  |  |
| 4251 | HDHC2     | GEO  |  |
| 4252 | HDGF      | GEO  |  |
| 4253 | HDGF2     | GEO  |  |
| 4254 | HDGFRP3   | GEO  |  |
| 4255 | HDX       | GEO  |  |
| 4256 | HEATR2    | GEO  |  |
| 4257 | HEATR4    | GEO  |  |
| 4258 | HEATR6    | GEO  |  |
| 4259 | HEATR7A   | GEO  |  |
| 4260 | HEATR7B1  | GEO  |  |
| 4261 | HECTD2    | GEO  |  |
| 4262 | HEG1      | GEO  |  |
| 4263 | HELLS     | GEO  |  |
| 4264 | HEMK1     | GEO  |  |
| 4265 | HEPACAM   | GEO  |  |
| 4266 | HEPH      | GEO  |  |
| 4267 | HERC1     | GEO  |  |
| 4268 | HERC2     | GAD  |  |
| 4269 | HERPUD1   | GEO  |  |
| 4270 | HES5      | GEO  |  |
| 4271 | HES6      | GEO  |  |
| 4272 | HFE       | GAD  |  |
| 4273 | HFE2      | GAD  |  |
| 4274 | HGFAC     | GEO  |  |
| 4275 | HHEX      | GEO  |  |
| 4276 | HHIP      | Both |  |
| 4277 | HIATL1    | GEO  |  |
| 4278 | HIBADH    | GEO  |  |
| 4279 | HIBCH     | GEO  |  |
| 4280 | HIC1      | Both |  |
| 4281 | HIF1A     | GAD  |  |
| 4282 | HIG1      | GEO  |  |
| 4283 | HIGD2A    | GEO  |  |
| 4284 | HIP1      | GEO  |  |
| 4285 | HIPK3     | GEO  |  |
| 4286 | HISPPD2A  | GEO  |  |
| 4287 | HIST1H1B  | GEO  |  |
| 4288 | HIST1H1C  | GEO  |  |
| 4289 | HIST1H1D  | GAD  |  |
| 4290 | HIST1H1T  | GEO  |  |
| 4291 | HIST1H2AC | GEO  |  |
| 4292 | HIST1H2AD | GEO  |  |
| 4293 | HIST1H2AG | GEO  |  |
| 4294 | HIST1H2BB | GEO  |  |
| 4295 | HIST1H2BC | GEO  |  |
| 4296 | HIST1H2BD | GEO  |  |
| 4297 | HIST1H2BE | GEO  |  |
| 4298 | HIST1H2BF | GEO  |  |

|      |            |      |  |
|------|------------|------|--|
| 4299 | HIST1H2BH  | GEO  |  |
| 4300 | HIST1H2BI  | GEO  |  |
| 4301 | HIST1H2BJ  | GEO  |  |
| 4302 | HIST1H2BK  | GEO  |  |
| 4303 | HIST1H2BL  | GEO  |  |
| 4304 | HIST1H2BM  | GEO  |  |
| 4305 | HIST1H2BN  | GEO  |  |
| 4306 | HIST1H2BO  | GEO  |  |
| 4307 | HIST1H3C   | GEO  |  |
| 4308 | HIST1H3D   | GEO  |  |
| 4309 | HIST1H3F   | GEO  |  |
| 4310 | HIST1H3G   | GEO  |  |
| 4311 | HIST1H3H   | GEO  |  |
| 4312 | HIST1H3J   | GEO  |  |
| 4313 | HIST1H4B   | GEO  |  |
| 4314 | HIST1H4C   | GEO  |  |
| 4315 | HIST1H4D   | GEO  |  |
| 4316 | HIST2H2AA3 | GEO  |  |
| 4317 | HIST2H2AA4 | GEO  |  |
| 4318 | HIST2H2AC  | GEO  |  |
| 4319 | HIST2H2BE  | GEO  |  |
| 4320 | HIST3H2A   | GEO  |  |
| 4321 | HIST3H2BB  | GEO  |  |
| 4322 | HIST4H4    | GEO  |  |
| 4323 | HIVEP2     | GEO  |  |
| 4324 | HK1        | GEO  |  |
| 4325 | HK2        | GEO  |  |
| 4326 | HLA        | GAD  |  |
| 4327 | HLA-A      | Both |  |
| 4328 | HLA-B      | GAD  |  |
| 4329 | HLA-C      | Both |  |
| 4330 | HLA-DMB    | GEO  |  |
| 4331 | HLA-DOA    | GEO  |  |
| 4332 | HLA-DPA1   | Both |  |
| 4333 | HLA-DPB1   | GEO  |  |
| 4334 | HLA-DQA1   | Both |  |
| 4335 | HLA-DQB1   | Both |  |
| 4336 | HLA-DRA    | Both |  |
| 4337 | HLA-DRB4   | GEO  |  |
| 4338 | HLA-DRB5   | GAD  |  |
| 4339 | HLA-E      | GEO  |  |
| 4340 | HLA-F      | GEO  |  |
| 4341 | HLA-G      | Both |  |
| 4342 | HLF        | GEO  |  |
| 4343 | HM13       | GEO  |  |
| 4344 | HMCN1      | GEO  |  |
| 4345 | HMCN2      | GEO  |  |
| 4346 | HMFN0839   | GEO  |  |
| 4347 | HMGB1      | GEO  |  |
| 4348 | HMGB3      | GEO  |  |

|      |             |      |  |
|------|-------------|------|--|
| 4349 | HMGCLL1     | GEO  |  |
| 4350 | HMGCR       | Both |  |
| 4351 | HMGCS2      | Both |  |
| 4352 | HMG5        | GEO  |  |
| 4353 | HMMR        | GEO  |  |
| 4354 | HMOX1       | Both |  |
| 4355 | HMP19       | GEO  |  |
| 4356 | HMSD        | GEO  |  |
| 4357 | HN1         | GEO  |  |
| 4358 | HN1L        | GEO  |  |
| 4359 | HNF1A       | Both |  |
| 4360 | HNRNPA1     | GEO  |  |
| 4361 | HNRNPA3     | GEO  |  |
| 4362 | HNRNPAB     | GEO  |  |
| 4363 | HNRNPC      | GEO  |  |
| 4364 | HNRNPD      | GEO  |  |
| 4365 | HNRNPH2     | GEO  |  |
| 4366 | HNRNPH3     | GEO  |  |
| 4367 | HNRNPL      | GEO  |  |
| 4368 | HNRNPM      | GEO  |  |
| 4369 | HNRNPUL1    | GEO  |  |
| 4370 | HNRPH1      | GEO  |  |
| 4371 | HOMER1      | GEO  |  |
| 4372 | HOMER3      | GEO  |  |
| 4373 | HOM-TES-103 | GEO  |  |
| 4374 | HOPX        | GEO  |  |
| 4375 | HORMAD1     | GEO  |  |
| 4376 | HORMAD2     | GAD  |  |
| 4377 | HOXA10      | GEO  |  |
| 4378 | HOXA3       | GEO  |  |
| 4379 | HOXB13      | GEO  |  |
| 4380 | HOXB4       | GEO  |  |
| 4381 | HOXB6       | GEO  |  |
| 4382 | HOXB7       | GEO  |  |
| 4383 | HOXB9       | GEO  |  |
| 4384 | HOXC10      | GEO  |  |
| 4385 | HOXC13      | GEO  |  |
| 4386 | HOXC5       | GEO  |  |
| 4387 | HOXC6       | GEO  |  |
| 4388 | HOXD10      | GEO  |  |
| 4389 | HOXD11      | GEO  |  |
| 4390 | HOXD13      | GEO  |  |
| 4391 | HOXD4       | GEO  |  |
| 4392 | HP1BP3      | GEO  |  |
| 4393 | HPCAL1      | GEO  |  |
| 4394 | HPD         | GEO  |  |
| 4395 | HPDL        | GEO  |  |
| 4396 | HPGDS       | GEO  |  |
| 4397 | HPRP8BP     | GEO  |  |
| 4398 | HPRT1       | GAD  |  |

|      |           |      |  |
|------|-----------|------|--|
| 4399 | HPSE      | GEO  |  |
| 4400 | HPX       | GEO  |  |
| 4401 | HR        | GEO  |  |
| 4402 | HRAS      | Both |  |
| 4403 | HRASLS3   | GEO  |  |
| 4404 | HRASLS5   | GEO  |  |
| 4405 | HRBL      | GEO  |  |
| 4406 | HRCT1     | GEO  |  |
| 4407 | HRG       | GEO  |  |
| 4408 | HRH1      | GEO  |  |
| 4409 | HRK       | GEO  |  |
| 4410 | HRNBP3    | GEO  |  |
| 4411 | HS2ST1    | GEO  |  |
| 4412 | HS6ST1    | GEO  |  |
| 4413 | HSA272196 | GEO  |  |
| 4414 | HSBP1L1   | GEO  |  |
| 4415 | HSD11B1   | GEO  |  |
| 4416 | HSD17B1   | GEO  |  |
| 4417 | HSD17B11  | GEO  |  |
| 4418 | HSD17B12  | GEO  |  |
| 4419 | HSD17B3   | Both |  |
| 4420 | HSD17B4   | GEO  |  |
| 4421 | HSD17B6   | GEO  |  |
| 4422 | HSD17B7   | GEO  |  |
| 4423 | HSF1      | GEO  |  |
| 4424 | HSH2D     | GEO  |  |
| 4425 | HSP90AA1  | GEO  |  |
| 4426 | HSP90AB1  | GEO  |  |
| 4427 | HSPA1A    | GEO  |  |
| 4428 | HSPA1B    | GAD  |  |
| 4429 | HSPA4     | GEO  |  |
| 4430 | HSPA4L    | GEO  |  |
| 4431 | HSPA6     | GEO  |  |
| 4432 | HSPB2     | GEO  |  |
| 4433 | HSPB3     | GEO  |  |
| 4434 | HSPB8     | GEO  |  |
| 4435 | HSPC159   | GEO  |  |
| 4436 | HSPG2     | GEO  |  |
| 4437 | HTR2B     | GEO  |  |
| 4438 | HTRA1     | GEO  |  |
| 4439 | HTRA3     | GEO  |  |
| 4440 | HUS1      | GEO  |  |
| 4441 | HYAL1     | GEO  |  |
| 4442 | HYDIN     | GEO  |  |
| 4443 | HYI       | GEO  |  |
| 4444 | HYLS1     | GEO  |  |
| 4445 | HYMAI     | GEO  |  |
| 4446 | IARS      | GEO  |  |
| 4447 | IBD2      | GAD  |  |
| 4448 | IBD5      | GAD  |  |

|      |         |      |  |
|------|---------|------|--|
| 4449 | IBSP    | GEO  |  |
| 4450 | ICA1L   | GEO  |  |
| 4451 | ICAM1   | Both |  |
| 4452 | ICOSLG  | Both |  |
| 4453 | ID1     | GEO  |  |
| 4454 | ID2B    | GEO  |  |
| 4455 | ID4     | GEO  |  |
| 4456 | IDH1    | GEO  |  |
| 4457 | IDH2    | GEO  |  |
| 4458 | IDH3A   | GEO  |  |
| 4459 | IDI2    | GEO  |  |
| 4460 | IDS     | GEO  |  |
| 4461 | IDUA    | GEO  |  |
| 4462 | IER3    | GEO  |  |
| 4463 | IER5    | GEO  |  |
| 4464 | IFFO2   | GEO  |  |
| 4465 | IFI27   | GEO  |  |
| 4466 | IFI27L1 | GEO  |  |
| 4467 | IFI27L2 | GEO  |  |
| 4468 | IFI30   | GEO  |  |
| 4469 | IFI44   | GEO  |  |
| 4470 | IFI6    | GEO  |  |
| 4471 | IFIH1   | GEO  |  |
| 4472 | IFIT2   | GEO  |  |
| 4473 | IFIT3   | GEO  |  |
| 4474 | IFIT5   | GEO  |  |
| 4475 | IFITM4P | GEO  |  |
| 4476 | IFNA4   | GEO  |  |
| 4477 | IFNAR2  | GEO  |  |
| 4478 | IFNG    | GAD  |  |
| 4479 | IFNGR1  | Both |  |
| 4480 | IFRD2   | GEO  |  |
| 4481 | IFT57   | GEO  |  |
| 4482 | IFT74   | GEO  |  |
| 4483 | IFT80   | GEO  |  |
| 4484 | IFT81   | GEO  |  |
| 4485 | IFT88   | GEO  |  |
| 4486 | IGF1R   | Both |  |
| 4487 | IGF2    | GEO  |  |
| 4488 | IGF2BP1 | GEO  |  |
| 4489 | IGF2R   | GEO  |  |
| 4490 | IGFBP1  | GAD  |  |
| 4491 | IGFBP2  | GEO  |  |
| 4492 | IGFBP5  | GEO  |  |
| 4493 | IGFBP6  | GEO  |  |
| 4494 | IGFBP7  | GEO  |  |
| 4495 | IGFBPL1 | GEO  |  |
| 4496 | IGFL2   | GEO  |  |
| 4497 | IGFL4   | GEO  |  |
| 4498 | IGHD    | GEO  |  |

|      |          |      |  |
|------|----------|------|--|
| 4499 | IGHG3    | GEO  |  |
| 4500 | IGHM     | GEO  |  |
| 4501 | IGHMBP2  | GEO  |  |
| 4502 | IGHV3-48 | GEO  |  |
| 4503 | IGK      | GEO  |  |
| 4504 | IGKC     | GEO  |  |
| 4505 | IGKV1-5  | GEO  |  |
| 4506 | IGKV1D-8 | GEO  |  |
| 4507 | IGKV3-20 | GEO  |  |
| 4508 | IGKV4-1  | GEO  |  |
| 4509 | IGL      | GEO  |  |
| 4510 | IGLC7    | GEO  |  |
| 4511 | IGLJ3    | GEO  |  |
| 4512 | IGLL1    | GEO  |  |
| 4513 | IGLL3    | GEO  |  |
| 4514 | IGLL3P   | GEO  |  |
| 4515 | IGLL5    | GEO  |  |
| 4516 | IGLV1-36 | GEO  |  |
| 4517 | IGLV1-40 | GEO  |  |
| 4518 | IGLV1-44 | GEO  |  |
| 4519 | IGLV2-23 | GEO  |  |
| 4520 | IGLV4-60 | GEO  |  |
| 4521 | IGLV6-57 | GEO  |  |
| 4522 | IGSF3    | GEO  |  |
| 4523 | IGSF6    | GAD  |  |
| 4524 | IGSF9    | GEO  |  |
| 4525 | IHH      | Both |  |
| 4526 | IKBKB    | Both |  |
| 4527 | IKBKE    | GEO  |  |
| 4528 | IKBKG    | GEO  |  |
| 4529 | IKBL     | GAD  |  |
| 4530 | IKZF1    | Both |  |
| 4531 | IL10     | GAD  |  |
| 4532 | IL10RA   | GEO  |  |
| 4533 | IL11     | Both |  |
| 4534 | IL11RA   | GEO  |  |
| 4535 | IL12A    | GAD  |  |
| 4536 | IL12B    | GAD  |  |
| 4537 | IL12RB1  | GAD  |  |
| 4538 | IL12RB2  | GEO  |  |
| 4539 | IL13     | GAD  |  |
| 4540 | IL15RA   | GEO  |  |
| 4541 | IL16     | Both |  |
| 4542 | IL17F    | GAD  |  |
| 4543 | IL17RB   | GEO  |  |
| 4544 | IL17RD   | GEO  |  |
| 4545 | IL17REL  | GAD  |  |
| 4546 | IL18     | GAD  |  |
| 4547 | IL18BP   | GEO  |  |
| 4548 | IL18R1   | GAD  |  |

|      |          |      |  |
|------|----------|------|--|
| 4549 | IL18RAP  | GAD  |  |
| 4550 | IL19     | GAD  |  |
| 4551 | IL1A     | Both |  |
| 4552 | IL1B     | Both |  |
| 4553 | IL1F7    | GEO  |  |
| 4554 | IL1R1    | Both |  |
| 4555 | IL1RAP   | GEO  |  |
| 4556 | IL1RAPL1 | GEO  |  |
| 4557 | IL1RN    | Both |  |
| 4558 | IL2      | GAD  |  |
| 4559 | IL20RA   | GEO  |  |
| 4560 | IL21     | GAD  |  |
| 4561 | IL21R    | GEO  |  |
| 4562 | IL22     | GAD  |  |
| 4563 | IL22RA1  | GEO  |  |
| 4564 | IL23A    | Both |  |
| 4565 | IL23R    | GAD  |  |
| 4566 | IL26     | GAD  |  |
| 4567 | IL27     | GAD  |  |
| 4568 | IL2RA    | GAD  |  |
| 4569 | IL2RB    | Both |  |
| 4570 | IL2RG    | GEO  |  |
| 4571 | IL32     | GEO  |  |
| 4572 | IL33     | GEO  |  |
| 4573 | IL3RA    | GEO  |  |
| 4574 | IL4      | GAD  |  |
| 4575 | IL4R     | GAD  |  |
| 4576 | IL5      | GAD  |  |
| 4577 | IL6      | Both |  |
| 4578 | IL6ST    | GEO  |  |
| 4579 | IL6STP   | GAD  |  |
| 4580 | IL9R     | GEO  |  |
| 4581 | ILD2R2   | GEO  |  |
| 4582 | ILF3     | GEO  |  |
| 4583 | ILVBL    | GEO  |  |
| 4584 | IMPA2    | GEO  |  |
| 4585 | IMPACT   | GEO  |  |
| 4586 | IMPDH1   | GEO  |  |
| 4587 | IMPDH2   | GEO  |  |
| 4588 | INA      | GEO  |  |
| 4589 | ING1     | GAD  |  |
| 4590 | ING2     | GEO  |  |
| 4591 | INHBE    | GEO  |  |
| 4592 | INO80C   | GEO  |  |
| 4593 | INPP1    | GEO  |  |
| 4594 | INPP5A   | GEO  |  |
| 4595 | INPP5D   | GEO  |  |
| 4596 | INPP5E   | GEO  |  |
| 4597 | INS      | GAD  |  |
| 4598 | INSIG1   | GEO  |  |

|      |             |      |  |
|------|-------------|------|--|
| 4599 | INSL4       | GAD  |  |
| 4600 | INSL5       | GEO  |  |
| 4601 | INSL6       | GAD  |  |
| 4602 | INSM1       | GEO  |  |
| 4603 | INSR        | Both |  |
| 4604 | INTS10      | GEO  |  |
| 4605 | INTS12      | GEO  |  |
| 4606 | INTS2       | GEO  |  |
| 4607 | INTS6       | GEO  |  |
| 4608 | INVS        | GEO  |  |
| 4609 | IP6K1       | GAD  |  |
| 4610 | IPO4        | GEO  |  |
| 4611 | IPO7        | GEO  |  |
| 4612 | IPO9        | GEO  |  |
| 4613 | IQCA1       | GEO  |  |
| 4614 | IQCE        | GEO  |  |
| 4615 | IQCG        | GEO  |  |
| 4616 | IQCH        | GEO  |  |
| 4617 | IQCI-SCHIP1 | GEO  |  |
| 4618 | IQCK        | GEO  |  |
| 4619 | IQGAP1      | GEO  |  |
| 4620 | IQGAP2      | GEO  |  |
| 4621 | IQGAP3      | GEO  |  |
| 4622 | IQSEC1      | GEO  |  |
| 4623 | IRAK1       | GEO  |  |
| 4624 | IRAK3       | GAD  |  |
| 4625 | IRF1        | GAD  |  |
| 4626 | IRF2BP2     | GEO  |  |
| 4627 | IRF3        | GEO  |  |
| 4628 | IRF5        | GAD  |  |
| 4629 | IRF6        | GEO  |  |
| 4630 | IRF7        | GEO  |  |
| 4631 | IRF8        | GEO  |  |
| 4632 | IRF9        | GEO  |  |
| 4633 | IRGM        | GAD  |  |
| 4634 | IRS1        | GAD  |  |
| 4635 | IRS2        | GAD  |  |
| 4636 | IRX3        | GEO  |  |
| 4637 | IRX4        | GEO  |  |
| 4638 | IRX5        | GEO  |  |
| 4639 | ISCU        | GEO  |  |
| 4640 | ISG20L2     | GEO  |  |
| 4641 | ISL1        | GEO  |  |
| 4642 | ISM1        | GEO  |  |
| 4643 | ISX         | GEO  |  |
| 4644 | ISYNA1      | GEO  |  |
| 4645 | ITFG1       | GEO  |  |
| 4646 | ITGA1       | GEO  |  |
| 4647 | ITGA10      | GEO  |  |
| 4648 | ITGA2       | Both |  |

|      |          |      |  |
|------|----------|------|--|
| 4649 | ITGA3    | GEO  |  |
| 4650 | ITGA4    | GEO  |  |
| 4651 | ITGA7    | GEO  |  |
| 4652 | ITGA8    | GEO  |  |
| 4653 | ITGAL    | Both |  |
| 4654 | ITGAM    | GEO  |  |
| 4655 | ITGB1    | GEO  |  |
| 4656 | ITGB1BP3 | GEO  |  |
| 4657 | ITGB3    | GAD  |  |
| 4658 | ITGB4    | GEO  |  |
| 4659 | ITGB7    | GAD  |  |
| 4660 | ITGBL1   | GEO  |  |
| 4661 | ITIH1    | GEO  |  |
| 4662 | ITK      | GEO  |  |
| 4663 | ITM2A    | GEO  |  |
| 4664 | ITPA     | Both |  |
| 4665 | ITPKA    | GEO  |  |
| 4666 | ITPKB    | GEO  |  |
| 4667 | ITPKC    | GEO  |  |
| 4668 | ITPR2    | GEO  |  |
| 4669 | ITPR3    | GEO  |  |
| 4670 | ITPRIPL1 | GEO  |  |
| 4671 | IYD      | GEO  |  |
| 4672 | JAG1     | GEO  |  |
| 4673 | JAK1     | GEO  |  |
| 4674 | JAK2     | GAD  |  |
| 4675 | JAK3     | GEO  |  |
| 4676 | JAKMIP2  | GEO  |  |
| 4677 | JAKMIP3  | GEO  |  |
| 4678 | JAM2     | GEO  |  |
| 4679 | JARID1A  | GEO  |  |
| 4680 | JARID1D  | GEO  |  |
| 4681 | JCLN     | GEO  |  |
| 4682 | JDP2     | GEO  |  |
| 4683 | JMJD1A   | GEO  |  |
| 4684 | JMJD1C   | GEO  |  |
| 4685 | JMJD2C   | GEO  |  |
| 4686 | JMJD7    | GEO  |  |
| 4687 | JMY      | GEO  |  |
| 4688 | JPH1     | GEO  |  |
| 4689 | JPH2     | GEO  |  |
| 4690 | JUN      | Both |  |
| 4691 | JUNB     | GEO  |  |
| 4692 | JUP      | GEO  |  |
| 4693 | K1F21B   | GAD  |  |
| 4694 | KALRN    | GEO  |  |
| 4695 | KANK1    | GEO  |  |
| 4696 | KAT2A    | GEO  |  |
| 4697 | KAT2B    | GEO  |  |
| 4698 | KATNA1   | GEO  |  |

|      |          |      |  |
|------|----------|------|--|
| 4699 | KATNAL1  | GEO  |  |
| 4700 | KAZ      | GEO  |  |
| 4701 | KAZALD1  | GEO  |  |
| 4702 | KBTBD11  | GEO  |  |
| 4703 | KBTBD2   | GEO  |  |
| 4704 | KCNAB2   | GEO  |  |
| 4705 | KCNC1    | GEO  |  |
| 4706 | KCNC3    | GEO  |  |
| 4707 | KCNE1    | GEO  |  |
| 4708 | KCNE2    | GEO  |  |
| 4709 | KCNE4    | GEO  |  |
| 4710 | KCNG3    | GEO  |  |
| 4711 | KCNH8    | GEO  |  |
| 4712 | KCNIP2   | GEO  |  |
| 4713 | KCNIP4   | GEO  |  |
| 4714 | KCNJ13   | GEO  |  |
| 4715 | KCNJ15   | GEO  |  |
| 4716 | KCNK10   | GEO  |  |
| 4717 | KCNK15   | GEO  |  |
| 4718 | KCNMA1   | GEO  |  |
| 4719 | KCNMB1   | GEO  |  |
| 4720 | KCNN3    | GEO  |  |
| 4721 | KCNN4    | Both |  |
| 4722 | KCNRG    | GEO  |  |
| 4723 | KCNV1    | GEO  |  |
| 4724 | KCP      | GEO  |  |
| 4725 | KCTD1    | GEO  |  |
| 4726 | KCTD20   | GEO  |  |
| 4727 | KCTD5    | GEO  |  |
| 4728 | KCTD6    | GEO  |  |
| 4729 | KDELR2   | GEO  |  |
| 4730 | KDELR3   | GEO  |  |
| 4731 | KDM2B    | GEO  |  |
| 4732 | KDM4C    | GEO  |  |
| 4733 | KDM5D    | GEO  |  |
| 4734 | KDM6B    | GEO  |  |
| 4735 | KDR      | GAD  |  |
| 4736 | KEAP1    | GEO  |  |
| 4737 | KEL      | GAD  |  |
| 4738 | KHDC1L   | GEO  |  |
| 4739 | KHSRP    | GEO  |  |
| 4740 | KIAA0020 | GEO  |  |
| 4741 | KIAA0090 | GEO  |  |
| 4742 | KIAA0101 | GEO  |  |
| 4743 | KIAA0141 | GEO  |  |
| 4744 | KIAA0146 | GEO  |  |
| 4745 | KIAA0182 | GEO  |  |
| 4746 | KIAA0226 | GEO  |  |
| 4747 | KIAA0232 | GEO  |  |
| 4748 | KIAA0247 | GEO  |  |

|      |          |      |  |
|------|----------|------|--|
| 4749 | KIAA0319 | GEO  |  |
| 4750 | KIAA0355 | GEO  |  |
| 4751 | KIAA0368 | GEO  |  |
| 4752 | KIAA0406 | GEO  |  |
| 4753 | KIAA0415 | GEO  |  |
| 4754 | KIAA0430 | GEO  |  |
| 4755 | KIAA0467 | GEO  |  |
| 4756 | KIAA0485 | GEO  |  |
| 4757 | KIAA0495 | GEO  |  |
| 4758 | KIAA0513 | GEO  |  |
| 4759 | KIAA0562 | GEO  |  |
| 4760 | KIAA0564 | GEO  |  |
| 4761 | KIAA0574 | GEO  |  |
| 4762 | KIAA0802 | GEO  |  |
| 4763 | KIAA0895 | GEO  |  |
| 4764 | KIAA0907 | GEO  |  |
| 4765 | KIAA1109 | Both |  |
| 4766 | KIAA1161 | GEO  |  |
| 4767 | KIAA1211 | GEO  |  |
| 4768 | KIAA1274 | GEO  |  |
| 4769 | KIAA1333 | GEO  |  |
| 4770 | KIAA1377 | GEO  |  |
| 4771 | KIAA1430 | GEO  |  |
| 4772 | KIAA1432 | GEO  |  |
| 4773 | KIAA1462 | GEO  |  |
| 4774 | KIAA1467 | GEO  |  |
| 4775 | KIAA1522 | GEO  |  |
| 4776 | KIAA1586 | GEO  |  |
| 4777 | KIAA1598 | GEO  |  |
| 4778 | KIAA1609 | GEO  |  |
| 4779 | KIAA1632 | GEO  |  |
| 4780 | KIAA1659 | GEO  |  |
| 4781 | KIAA1683 | GEO  |  |
| 4782 | KIAA1712 | GEO  |  |
| 4783 | KIAA1731 | GEO  |  |
| 4784 | KIAA1737 | GEO  |  |
| 4785 | KIAA1754 | GEO  |  |
| 4786 | KIAA1755 | GEO  |  |
| 4787 | KIAA1797 | GEO  |  |
| 4788 | KIAA1826 | GEO  |  |
| 4789 | KIAA1881 | GEO  |  |
| 4790 | KIAA1912 | GEO  |  |
| 4791 | KIAA1920 | GEO  |  |
| 4792 | KIAA1984 | GEO  |  |
| 4793 | KIAA2022 | GEO  |  |
| 4794 | KIF11    | GEO  |  |
| 4795 | KIF13A   | GEO  |  |
| 4796 | KIF15    | GEO  |  |
| 4797 | KIF16B   | GEO  |  |
| 4798 | KIF18B   | GEO  |  |

|      |         |      |  |
|------|---------|------|--|
| 4799 | KIF19   | GEO  |  |
| 4800 | KIF1A   | GEO  |  |
| 4801 | KIF21A  | GEO  |  |
| 4802 | KIF21B  | Both |  |
| 4803 | KIF26B  | GEO  |  |
| 4804 | KIF4A   | GEO  |  |
| 4805 | KIF5A   | GEO  |  |
| 4806 | KIF5C   | GEO  |  |
| 4807 | KIF9    | GEO  |  |
| 4808 | KIR2DL2 | GAD  |  |
| 4809 | KIR2DL3 | GAD  |  |
| 4810 | KIR2DS2 | GAD  |  |
| 4811 | KIR2DS4 | GAD  |  |
| 4812 | KIR3DL1 | GAD  |  |
| 4813 | KISS1R  | GEO  |  |
| 4814 | KIT     | GEO  |  |
| 4815 | KITLG   | GEO  |  |
| 4816 | KLB     | GEO  |  |
| 4817 | KLF10   | GEO  |  |
| 4818 | KLF11   | GEO  |  |
| 4819 | KLF13   | GEO  |  |
| 4820 | KLF15   | GEO  |  |
| 4821 | KLF2    | GEO  |  |
| 4822 | KLF5    | GEO  |  |
| 4823 | KLF7    | GEO  |  |
| 4824 | KLF8    | GEO  |  |
| 4825 | KLHDC1  | GAD  |  |
| 4826 | KLHDC10 | GEO  |  |
| 4827 | KLHDC8B | GEO  |  |
| 4828 | KLHL13  | GEO  |  |
| 4829 | KLHL14  | GEO  |  |
| 4830 | KLHL15  | GEO  |  |
| 4831 | KLHL24  | GEO  |  |
| 4832 | KLHL34  | GEO  |  |
| 4833 | KLHL35  | GEO  |  |
| 4834 | KLHL4   | GEO  |  |
| 4835 | KLHL5   | GEO  |  |
| 4836 | KLHL7   | GEO  |  |
| 4837 | KLK1    | GEO  |  |
| 4838 | KLK11   | GEO  |  |
| 4839 | KLK12   | GEO  |  |
| 4840 | KLK15   | GEO  |  |
| 4841 | KLK6    | GEO  |  |
| 4842 | KLK7    | GEO  |  |
| 4843 | KLKB1   | GEO  |  |
| 4844 | KLRB1   | GEO  |  |
| 4845 | KLRC4   | GAD  |  |
| 4846 | KLRF1   | GEO  |  |
| 4847 | KLRG2   | GEO  |  |
| 4848 | KLRK1   | Both |  |

|      |          |      |  |
|------|----------|------|--|
| 4849 | KMO      | GEO  |  |
| 4850 | KNG1     | GEO  |  |
| 4851 | KPNA1    | GEO  |  |
| 4852 | KPNA2    | GEO  |  |
| 4853 | KPNA4    | GEO  |  |
| 4854 | KPNA5    | GEO  |  |
| 4855 | KPNA7    | GAD  |  |
| 4856 | KRAS     | Both |  |
| 4857 | KRT10    | GEO  |  |
| 4858 | KRT14    | GEO  |  |
| 4859 | KRT17P3  | GEO  |  |
| 4860 | KRT18    | GEO  |  |
| 4861 | KRT18P28 | GEO  |  |
| 4862 | KRT18P40 | GEO  |  |
| 4863 | KRT19    | GEO  |  |
| 4864 | KRT19P2  | GEO  |  |
| 4865 | KRT3     | GEO  |  |
| 4866 | KRT34    | GEO  |  |
| 4867 | KRT37    | GEO  |  |
| 4868 | KRT38    | GAD  |  |
| 4869 | KRT39    | GEO  |  |
| 4870 | KRT5     | GEO  |  |
| 4871 | KRT7     | GEO  |  |
| 4872 | KRT74    | GEO  |  |
| 4873 | KRT8     | Both |  |
| 4874 | KRT8P15  | GEO  |  |
| 4875 | KRT8P41  | GEO  |  |
| 4876 | KRTAP1-3 | GEO  |  |
| 4877 | KRTAP4-1 | GEO  |  |
| 4878 | KRTAP5-5 | GEO  |  |
| 4879 | KRTCAP3  | GEO  |  |
| 4880 | KRTDAP   | GEO  |  |
| 4881 | KRTHA5   | GEO  |  |
| 4882 | KSR2     | GEO  |  |
| 4883 | KTN1     | GEO  |  |
| 4884 | KYNU     | GEO  |  |
| 4885 | L1CAM    | GEO  |  |
| 4886 | L1TD1    | GEO  |  |
| 4887 | L2HGDH   | GEO  |  |
| 4888 | L3MBTL1  | GEO  |  |
| 4889 | L3MBTL2  | GEO  |  |
| 4890 | L3MBTL4  | GEO  |  |
| 4891 | LACTB2   | GEO  |  |
| 4892 | LAD1     | GEO  |  |
| 4893 | LAMA1    | GEO  |  |
| 4894 | LAMA2    | GEO  |  |
| 4895 | LAMA3    | GEO  |  |
| 4896 | LAMA4    | GEO  |  |
| 4897 | LAMB2    | GEO  |  |
| 4898 | LAMP1    | GEO  |  |



|      |         |      |  |
|------|---------|------|--|
| 4899 | LAMP3   | GEO  |  |
| 4900 | LANCL3  | GEO  |  |
| 4901 | LAPTM4B | Both |  |
| 4902 | LARGE   | GEO  |  |
| 4903 | LARP1   | GEO  |  |
| 4904 | LARP4   | GEO  |  |
| 4905 | LARP6   | GEO  |  |
| 4906 | LARP7   | GEO  |  |
| 4907 | LASP1   | GEO  |  |
| 4908 | LASS4   | GEO  |  |
| 4909 | LASS5   | GEO  |  |
| 4910 | LASS6   | GEO  |  |
| 4911 | LATS2   | GEO  |  |
| 4912 | LAYN    | GEO  |  |
| 4913 | LBA1    | GEO  |  |
| 4914 | LBP     | GEO  |  |
| 4915 | LBR     | GEO  |  |
| 4916 | LCA5    | GEO  |  |
| 4917 | LCE1C   | GEO  |  |
| 4918 | LCK     | GEO  |  |
| 4919 | LCMT2   | GEO  |  |
| 4920 | LCN15   | GEO  |  |
| 4921 | LCN2    | GEO  |  |
| 4922 | LCOR    | GEO  |  |
| 4923 | LCORL   | GEO  |  |
| 4924 | LCP1    | GEO  |  |
| 4925 | LCP2    | GEO  |  |
| 4926 | LCT     | GAD  |  |
| 4927 | LDB2    | GEO  |  |
| 4928 | LDB3    | GEO  |  |
| 4929 | LDHA    | GEO  |  |
| 4930 | LEAP2   | GEO  |  |
| 4931 | LEFTY1  | GEO  |  |
| 4932 | LEP     | GAD  |  |
| 4933 | LEPR    | Both |  |
| 4934 | LEPREL1 | GEO  |  |
| 4935 | LEPROT  | GEO  |  |
| 4936 | LETM1   | GEO  |  |
| 4937 | LETM2   | GEO  |  |
| 4938 | LFNG    | GEO  |  |
| 4939 | LGALS1  | GEO  |  |
| 4940 | LGALS3  | GEO  |  |
| 4941 | LGALS7  | GEO  |  |
| 4942 | LGALS7B | GEO  |  |
| 4943 | LGALS8  | GEO  |  |
| 4944 | LGALS9  | GEO  |  |
| 4945 | LGALS9C | GEO  |  |
| 4946 | LGALSL  | GEO  |  |
| 4947 | LGI1    | GEO  |  |
| 4948 | LGI4    | GEO  |  |

|      |              |      |  |
|------|--------------|------|--|
| 4949 | LGMN         | GEO  |  |
| 4950 | LGR4         | GEO  |  |
| 4951 | LHFP         | GEO  |  |
| 4952 | LHFPL2       | GEO  |  |
| 4953 | LHPP         | GEO  |  |
| 4954 | LHX2         | GEO  |  |
| 4955 | LHX3         | GEO  |  |
| 4956 | LHX6         | GEO  |  |
| 4957 | LIAS         | GEO  |  |
| 4958 | LIF          | GAD  |  |
| 4959 | LIG1         | GAD  |  |
| 4960 | LIG3         | Both |  |
| 4961 | LIG4         | GAD  |  |
| 4962 | LILRA3       | GEO  |  |
| 4963 | LILRB3       | GEO  |  |
| 4964 | LILRB4       | GEO  |  |
| 4965 | LILRB5       | GEO  |  |
| 4966 | LIMA1        | GEO  |  |
| 4967 | LIMD2        | GEO  |  |
| 4968 | LIMK1        | GEO  |  |
| 4969 | LIMS1        | GEO  |  |
| 4970 | LIMS3        | GEO  |  |
| 4971 | LIN28B       | GAD  |  |
| 4972 | LIN52        | GEO  |  |
| 4973 | LIN7A        | GEO  |  |
| 4974 | LIN9         | GEO  |  |
| 4975 | LINC00152    | GEO  |  |
| 4976 | LINC00265    | GEO  |  |
| 4977 | LIPC         | GAD  |  |
| 4978 | LLGL2        | GEO  |  |
| 4979 | LMAN1        | GAD  |  |
| 4980 | LMAN2        | GEO  |  |
| 4981 | LMBRD1       | GEO  |  |
| 4982 | LMF1         | GEO  |  |
| 4983 | MLLN         | GEO  |  |
| 4984 | LMNA         | GEO  |  |
| 4985 | LMNB2        | GEO  |  |
| 4986 | LMO3         | GEO  |  |
| 4987 | LMO4         | GEO  |  |
| 4988 | LMO7         | GEO  |  |
| 4989 | LMOD1        | GEO  |  |
| 4990 | LNP1         | GEO  |  |
| 4991 | LNx2         | GEO  |  |
| 4992 | LOC100124692 | GEO  |  |
| 4993 | LOC100128252 | GEO  |  |
| 4994 | LOC100128288 | GEO  |  |
| 4995 | LOC100128328 | GEO  |  |
| 4996 | LOC100128343 | GEO  |  |
| 4997 | LOC100128511 | GEO  |  |
| 4998 | LOC100128701 | GEO  |  |

|      |              |     |  |
|------|--------------|-----|--|
| 4999 | LOC100128893 | GEO |  |
| 5000 | LOC100128988 | GEO |  |
| 5001 | LOC100129069 | GEO |  |
| 5002 | LOC100129113 | GEO |  |
| 5003 | LOC100129503 | GEO |  |
| 5004 | LOC100129637 | GEO |  |
| 5005 | LOC100130097 | GEO |  |
| 5006 | LOC100130357 | GEO |  |
| 5007 | LOC100130468 | GEO |  |
| 5008 | LOC100130776 | GEO |  |
| 5009 | LOC100131257 | GEO |  |
| 5010 | LOC100131564 | GEO |  |
| 5011 | LOC100131582 | GEO |  |
| 5012 | LOC100131656 | GEO |  |
| 5013 | LOC100131763 | GEO |  |
| 5014 | LOC100132153 | GEO |  |
| 5015 | LOC100132273 | GEO |  |
| 5016 | LOC100132891 | GEO |  |
| 5017 | LOC100132999 | GEO |  |
| 5018 | LOC100133005 | GEO |  |
| 5019 | LOC100133056 | GEO |  |
| 5020 | LOC100133572 | GEO |  |
| 5021 | LOC100133660 | GEO |  |
| 5022 | LOC100133920 | GEO |  |
| 5023 | LOC100134119 | GEO |  |
| 5024 | LOC100190939 | GEO |  |
| 5025 | LOC100216546 | GEO |  |
| 5026 | LOC100240728 | GEO |  |
| 5027 | LOC100287547 | GEO |  |
| 5028 | LOC100287689 | GEO |  |
| 5029 | LOC100287896 | GEO |  |
| 5030 | LOC100288092 | GEO |  |
| 5031 | LOC100288781 | GEO |  |
| 5032 | LOC100289026 | GEO |  |
| 5033 | LOC100289632 | GEO |  |
| 5034 | LOC100290278 | GEO |  |
| 5035 | LOC100292909 | GEO |  |
| 5036 | LOC100292959 | GEO |  |
| 5037 | LOC100499467 | GEO |  |
| 5038 | LOC100505483 | GEO |  |
| 5039 | LOC100505503 | GEO |  |
| 5040 | LOC100505522 | GEO |  |
| 5041 | LOC100505584 | GEO |  |
| 5042 | LOC100505633 | GEO |  |
| 5043 | LOC100505712 | GEO |  |
| 5044 | LOC100505730 | GEO |  |
| 5045 | LOC100505875 | GEO |  |
| 5046 | LOC100505876 | GEO |  |
| 5047 | LOC100506076 | GEO |  |
| 5048 | LOC100506168 | GEO |  |

|      |              |      |  |
|------|--------------|------|--|
| 5049 | LOC100506493 | GEO  |  |
| 5050 | LOC100506517 | GEO  |  |
| 5051 | LOC100506542 | GEO  |  |
| 5052 | LOC100506589 | GEO  |  |
| 5053 | LOC100506591 | GEO  |  |
| 5054 | LOC100506653 | GEO  |  |
| 5055 | LOC100506659 | GEO  |  |
| 5056 | LOC100506727 | GEO  |  |
| 5057 | LOC100506748 | GEO  |  |
| 5058 | LOC100506781 | GEO  |  |
| 5059 | LOC100506860 | GEO  |  |
| 5060 | LOC100506922 | GEO  |  |
| 5061 | LOC100506941 | GEO  |  |
| 5062 | LOC100506979 | GEO  |  |
| 5063 | LOC100507039 | GEO  |  |
| 5064 | LOC100507153 | GEO  |  |
| 5065 | LOC100507165 | GEO  |  |
| 5066 | LOC100507192 | GEO  |  |
| 5067 | LOC100507193 | GEO  |  |
| 5068 | LOC100507198 | GEO  |  |
| 5069 | LOC100507273 | GEO  |  |
| 5070 | LOC100507328 | GEO  |  |
| 5071 | LOC100507376 | GEO  |  |
| 5072 | LOC100507448 | GEO  |  |
| 5073 | LOC100507531 | GEO  |  |
| 5074 | LOC100507619 | GEO  |  |
| 5075 | LOC100507666 | GEO  |  |
| 5076 | LOC100507804 | GEO  |  |
| 5077 | LOC100507851 | GEO  |  |
| 5078 | LOC100508797 | GEO  |  |
| 5079 | LOC100508909 | GEO  |  |
| 5080 | LOC100509223 | GEO  |  |
| 5081 | LOC100509231 | GEO  |  |
| 5082 | LOC100509635 | GEO  |  |
| 5083 | LOC100509683 | GEO  |  |
| 5084 | LOC100509749 | GEO  |  |
| 5085 | LOC100509968 | GEO  |  |
| 5086 | LOC100510224 | GEO  |  |
| 5087 | LOC100510507 | GEO  |  |
| 5088 | LOC100510525 | GEO  |  |
| 5089 | LOC120364    | GEO  |  |
| 5090 | LOC120376    | Both |  |
| 5091 | LOC126235    | GEO  |  |
| 5092 | LOC144501    | GEO  |  |
| 5093 | LOC145837    | GEO  |  |
| 5094 | LOC146336    | GEO  |  |
| 5095 | LOC147645    | GEO  |  |
| 5096 | LOC148709    | GEO  |  |
| 5097 | LOC149134    | GEO  |  |
| 5098 | LOC149351    | GEO  |  |

|      |           |     |  |
|------|-----------|-----|--|
| 5099 | LOC150759 | GEO |  |
| 5100 | LOC153546 | GEO |  |
| 5101 | LOC153684 | GEO |  |
| 5102 | LOC157562 | GEO |  |
| 5103 | LOC157860 | GEO |  |
| 5104 | LOC158257 | GEO |  |
| 5105 | LOC158960 | GEO |  |
| 5106 | LOC199800 | GEO |  |
| 5107 | LOC201229 | GEO |  |
| 5108 | LOC201895 | GEO |  |
| 5109 | LOC202451 | GEO |  |
| 5110 | LOC219347 | GEO |  |
| 5111 | LOC220906 | GEO |  |
| 5112 | LOC253012 | GEO |  |
| 5113 | LOC253264 | GEO |  |
| 5114 | LOC254057 | GEO |  |
| 5115 | LOC255512 | GEO |  |
| 5116 | LOC25845  | GEO |  |
| 5117 | LOC26010  | GEO |  |
| 5118 | LOC26102  | GEO |  |
| 5119 | LOC283104 | GEO |  |
| 5120 | LOC283177 | GEO |  |
| 5121 | LOC283352 | GEO |  |
| 5122 | LOC283454 | GEO |  |
| 5123 | LOC283508 | GEO |  |
| 5124 | LOC283516 | GEO |  |
| 5125 | LOC283551 | GEO |  |
| 5126 | LOC283701 | GEO |  |
| 5127 | LOC283859 | GEO |  |
| 5128 | LOC284058 | GEO |  |
| 5129 | LOC284120 | GEO |  |
| 5130 | LOC284417 | GEO |  |
| 5131 | LOC284454 | GEO |  |
| 5132 | LOC284542 | GEO |  |
| 5133 | LOC284801 | GEO |  |
| 5134 | LOC284804 | GEO |  |
| 5135 | LOC285016 | GEO |  |
| 5136 | LOC285074 | GEO |  |
| 5137 | LOC285535 | GEO |  |
| 5138 | LOC285628 | GEO |  |
| 5139 | LOC285636 | GEO |  |
| 5140 | LOC285708 | GEO |  |
| 5141 | LOC285733 | GEO |  |
| 5142 | LOC285735 | GEO |  |
| 5143 | LOC285878 | GEO |  |
| 5144 | LOC285943 | GEO |  |
| 5145 | LOC285989 | GEO |  |
| 5146 | LOC286272 | GEO |  |
| 5147 | LOC286440 | GEO |  |
| 5148 | LOC286467 | GEO |  |

|      |           |     |  |
|------|-----------|-----|--|
| 5149 | LOC338667 | GEO |  |
| 5150 | LOC339988 | GEO |  |
| 5151 | LOC340843 | GEO |  |
| 5152 | LOC342918 | GEO |  |
| 5153 | LOC344967 | GEO |  |
| 5154 | LOC374443 | GEO |  |
| 5155 | LOC375190 | GEO |  |
| 5156 | LOC387763 | GEO |  |
| 5157 | LOC387921 | GEO |  |
| 5158 | LOC388335 | GEO |  |
| 5159 | LOC388564 | GEO |  |
| 5160 | LOC388886 | GEO |  |
| 5161 | LOC389023 | GEO |  |
| 5162 | LOC389160 | GEO |  |
| 5163 | LOC389249 | GEO |  |
| 5164 | LOC389634 | GEO |  |
| 5165 | LOC389834 | GEO |  |
| 5166 | LOC399744 | GEO |  |
| 5167 | LOC399753 | GEO |  |
| 5168 | LOC400128 | GEO |  |
| 5169 | LOC401022 | GEO |  |
| 5170 | LOC401093 | GEO |  |
| 5171 | LOC401233 | GEO |  |
| 5172 | LOC401357 | GEO |  |
| 5173 | LOC401522 | GEO |  |
| 5174 | LOC404266 | GEO |  |
| 5175 | LOC439990 | GEO |  |
| 5176 | LOC440173 | GEO |  |
| 5177 | LOC440233 | GEO |  |
| 5178 | LOC440302 | GEO |  |
| 5179 | LOC440338 | GEO |  |
| 5180 | LOC440354 | GEO |  |
| 5181 | LOC440396 | GEO |  |
| 5182 | LOC440459 | GEO |  |
| 5183 | LOC440589 | GEO |  |
| 5184 | LOC440607 | GEO |  |
| 5185 | LOC440838 | GEO |  |
| 5186 | LOC440896 | GEO |  |
| 5187 | LOC441124 | GEO |  |
| 5188 | LOC441282 | GEO |  |
| 5189 | LOC441426 | GEO |  |
| 5190 | LOC441644 | GEO |  |
| 5191 | LOC441775 | GEO |  |
| 5192 | LOC442270 | GEO |  |
| 5193 | LOC51233  | GEO |  |
| 5194 | LOC541469 | GEO |  |
| 5195 | LOC541471 | GEO |  |
| 5196 | LOC54492  | GEO |  |
| 5197 | LOC553137 | GEO |  |
| 5198 | LOC56920  | GEO |  |

|      |           |     |  |
|------|-----------|-----|--|
| 5199 | LOC572558 | GEO |  |
| 5200 | LOC595101 | GEO |  |
| 5201 | LOC63928  | GEO |  |
| 5202 | LOC642103 | GEO |  |
| 5203 | LOC642826 | GEO |  |
| 5204 | LOC642869 | GEO |  |
| 5205 | LOC643014 | GEO |  |
| 5206 | LOC643072 | GEO |  |
| 5207 | LOC643100 | GEO |  |
| 5208 | LOC643201 | GEO |  |
| 5209 | LOC643220 | GEO |  |
| 5210 | LOC643792 | GEO |  |
| 5211 | LOC643940 | GEO |  |
| 5212 | LOC644090 | GEO |  |
| 5213 | LOC644192 | GEO |  |
| 5214 | LOC644242 | GEO |  |
| 5215 | LOC644246 | GEO |  |
| 5216 | LOC644538 | GEO |  |
| 5217 | LOC644662 | GEO |  |
| 5218 | LOC644768 | GEO |  |
| 5219 | LOC644774 | GEO |  |
| 5220 | LOC645195 | GEO |  |
| 5221 | LOC645249 | GEO |  |
| 5222 | LOC645323 | GEO |  |
| 5223 | LOC645381 | GEO |  |
| 5224 | LOC646014 | GEO |  |
| 5225 | LOC646168 | GEO |  |
| 5226 | LOC646626 | GEO |  |
| 5227 | LOC646627 | GEO |  |
| 5228 | LOC646652 | GEO |  |
| 5229 | LOC646701 | GEO |  |
| 5230 | LOC646851 | GEO |  |
| 5231 | LOC647000 | GEO |  |
| 5232 | LOC647500 | GEO |  |
| 5233 | LOC647954 | GEO |  |
| 5234 | LOC647979 | GEO |  |
| 5235 | LOC648541 | GEO |  |
| 5236 | LOC648795 | GEO |  |
| 5237 | LOC650331 | GEO |  |
| 5238 | LOC650794 | GEO |  |
| 5239 | LOC651255 | GEO |  |
| 5240 | LOC652005 | GEO |  |
| 5241 | LOC653198 | GEO |  |
| 5242 | LOC653391 | GEO |  |
| 5243 | LOC653483 | GEO |  |
| 5244 | LOC653602 | GEO |  |
| 5245 | LOC727770 | GEO |  |
| 5246 | LOC727820 | GEO |  |
| 5247 | LOC727869 | GEO |  |
| 5248 | LOC727916 | GEO |  |

|      |           |      |  |
|------|-----------|------|--|
| 5249 | LOC727924 | GEO  |  |
| 5250 | LOC727944 | GEO  |  |
| 5251 | LOC727995 | GEO  |  |
| 5252 | LOC728047 | GEO  |  |
| 5253 | LOC728153 | GEO  |  |
| 5254 | LOC728264 | GEO  |  |
| 5255 | LOC728377 | GEO  |  |
| 5256 | LOC728392 | GEO  |  |
| 5257 | LOC728448 | GEO  |  |
| 5258 | LOC728449 | GEO  |  |
| 5259 | LOC728725 | GEO  |  |
| 5260 | LOC728769 | GEO  |  |
| 5261 | LOC728897 | GEO  |  |
| 5262 | LOC728903 | GEO  |  |
| 5263 | LOC729088 | GEO  |  |
| 5264 | LOC729680 | GEO  |  |
| 5265 | LOC729852 | GEO  |  |
| 5266 | LOC729983 | GEO  |  |
| 5267 | LOC730102 | GEO  |  |
| 5268 | LOC730286 | GEO  |  |
| 5269 | LOC730755 | GEO  |  |
| 5270 | LOC731049 | GEO  |  |
| 5271 | LOC731275 | GEO  |  |
| 5272 | LOC731404 | GEO  |  |
| 5273 | LOC731966 | GEO  |  |
| 5274 | LOC81691  | GEO  |  |
| 5275 | LOC90835  | GEO  |  |
| 5276 | LOC91316  | GEO  |  |
| 5277 | LOC92482  | GEO  |  |
| 5278 | LOC96610  | GEO  |  |
| 5279 | LOH12CR1  | GEO  |  |
| 5280 | LONP1     | GEO  |  |
| 5281 | LONP2     | GEO  |  |
| 5282 | LONRF2    | GEO  |  |
| 5283 | LONRF3    | GEO  |  |
| 5284 | LPCAT2    | GEO  |  |
| 5285 | LPGAT1    | GEO  |  |
| 5286 | LPHN1     | GEO  |  |
| 5287 | LPHN2     | GEO  |  |
| 5288 | LPIN1     | GEO  |  |
| 5289 | LPIN2     | GEO  |  |
| 5290 | LPL       | Both |  |
| 5291 | LPP       | GEO  |  |
| 5292 | LQK1      | GEO  |  |
| 5293 | LRCH2     | GEO  |  |
| 5294 | LRCH4     | GEO  |  |
| 5295 | LRFN4     | GEO  |  |
| 5296 | LRMP      | GEO  |  |
| 5297 | LRP10     | GEO  |  |
| 5298 | LRP2      | GEO  |  |

|      |         |      |  |
|------|---------|------|--|
| 5299 | LRP3    | GEO  |  |
| 5300 | LRP5    | GEO  |  |
| 5301 | LRPAP1  | GEO  |  |
| 5302 | LRRC1   | GEO  |  |
| 5303 | LRRC16A | GEO  |  |
| 5304 | LRRC2   | GEO  |  |
| 5305 | LRRC27  | GEO  |  |
| 5306 | LRRC31  | GEO  |  |
| 5307 | LRRC32  | GEO  |  |
| 5308 | LRRC3B  | GEO  |  |
| 5309 | LRRC56  | GEO  |  |
| 5310 | LRRC57  | GEO  |  |
| 5311 | LRRC58  | GEO  |  |
| 5312 | LRRC6   | GEO  |  |
| 5313 | LRRC66  | GEO  |  |
| 5314 | LRRC8C  | GEO  |  |
| 5315 | LRRFIP1 | GEO  |  |
| 5316 | LRRFIP2 | GEO  |  |
| 5317 | LRRK2   | Both |  |
| 5318 | LRRN4   | GEO  |  |
| 5319 | LRRN5   | GEO  |  |
| 5320 | LRTM1   | GEO  |  |
| 5321 | LSM11   | GEO  |  |
| 5322 | LSM6    | GEO  |  |
| 5323 | LSP1    | GEO  |  |
| 5324 | LST1    | GEO  |  |
| 5325 | LTA     | Both |  |
| 5326 | LTA4H   | GEO  |  |
| 5327 | LTB     | GEO  |  |
| 5328 | LTB4DH  | GEO  |  |
| 5329 | LTB4R   | GEO  |  |
| 5330 | LTBP1   | GAD  |  |
| 5331 | LTBP3   | GEO  |  |
| 5332 | LTBP4   | Both |  |
| 5333 | LTK     | GEO  |  |
| 5334 | LTN1    | GEO  |  |
| 5335 | LUC7L2  | GEO  |  |
| 5336 | LUM     | GEO  |  |
| 5337 | LUZP1   | GEO  |  |
| 5338 | LY6E    | GEO  |  |
| 5339 | LY6K    | GEO  |  |
| 5340 | LY9     | GEO  |  |
| 5341 | LYG1    | GEO  |  |
| 5342 | LYN     | GEO  |  |
| 5343 | LYNX1   | GEO  |  |
| 5344 | LYPD5   | GEO  |  |
| 5345 | LYPLAL1 | GEO  |  |
| 5346 | LYRM1   | GEO  |  |
| 5347 | LYRM2   | GEO  |  |
| 5348 | LYRM4   | GAD  |  |

|      |         |      |  |
|------|---------|------|--|
| 5349 | LYRM5   | GEO  |  |
| 5350 | LYSMD2  | GEO  |  |
| 5351 | LYST    | GEO  |  |
| 5352 | LYVE1   | GEO  |  |
| 5353 | LZTS1   | GEO  |  |
| 5354 | M6PRBP1 | GEO  |  |
| 5355 | MACF1   | GEO  |  |
| 5356 | MACROD1 | GEO  |  |
| 5357 | MAD1L1  | GEO  |  |
| 5358 | MAD2L1  | GEO  |  |
| 5359 | MADCAM1 | GEO  |  |
| 5360 | MADH3   | GEO  |  |
| 5361 | MAEL    | GEO  |  |
| 5362 | MAFB    | GEO  |  |
| 5363 | MAFF    | GEO  |  |
| 5364 | MAFG    | GEO  |  |
| 5365 | MAFK    | GEO  |  |
| 5366 | MAG     | GEO  |  |
| 5367 | MAGEA1  | GEO  |  |
| 5368 | MAGEA12 | GEO  |  |
| 5369 | MAGEA2  | GEO  |  |
| 5370 | MAGEA3  | GEO  |  |
| 5371 | MAGEA4  | GEO  |  |
| 5372 | MAGEA6  | GEO  |  |
| 5373 | MAGEB2  | GEO  |  |
| 5374 | MAGED1  | GEO  |  |
| 5375 | MAGED2  | GEO  |  |
| 5376 | MAGED4  | GEO  |  |
| 5377 | MAGEL2  | GEO  |  |
| 5378 | MAGI2   | Both |  |
| 5379 | MAGOH   | GEO  |  |
| 5380 | MAGT1   | GEO  |  |
| 5381 | MAK     | GEO  |  |
| 5382 | MAL     | GEO  |  |
| 5383 | MAL2    | GEO  |  |
| 5384 | MALT1   | GEO  |  |
| 5385 | MAMLD1  | GEO  |  |
| 5386 | MAN1C1  | GEO  |  |
| 5387 | MAN2B2  | GEO  |  |
| 5388 | MAN2C1  | GEO  |  |
| 5389 | MANBA   | Both |  |
| 5390 | MANSC1  | GEO  |  |
| 5391 | MAP1A   | GEO  |  |
| 5392 | MAP2    | GEO  |  |
| 5393 | MAP2K1  | GEO  |  |
| 5394 | MAP2K3  | GEO  |  |
| 5395 | MAP2K4  | GAD  |  |
| 5396 | MAP2K5  | GEO  |  |
| 5397 | MAP3K3  | GEO  |  |
| 5398 | MAP3K4  | GEO  |  |

|      |           |      |  |
|------|-----------|------|--|
| 5399 | MAP3K7    | Both |  |
| 5400 | MAP3K7IP1 | GAD  |  |
| 5401 | MAP4      | GEO  |  |
| 5402 | MAP7      | GEO  |  |
| 5403 | MAP7D2    | GEO  |  |
| 5404 | MAPK11    | GEO  |  |
| 5405 | MAPK13    | GEO  |  |
| 5406 | MAPK8     | GEO  |  |
| 5407 | MAPK8IP1  | GEO  |  |
| 5408 | MAPK8IP3  | GEO  |  |
| 5409 | MAPK9     | GEO  |  |
| 5410 | MAPKAPK2  | GEO  |  |
| 5411 | MAPRE2    | Both |  |
| 5412 | MAPT      | GEO  |  |
| 5413 | MARCH3    | GEO  |  |
| 5414 | MARCH5    | GEO  |  |
| 5415 | MARCKS    | GEO  |  |
| 5416 | MARCKSL1  | GEO  |  |
| 5417 | MARK1     | GEO  |  |
| 5418 | MARK3     | GEO  |  |
| 5419 | MARVELD1  | GEO  |  |
| 5420 | MARVELD3  | GEO  |  |
| 5421 | MASP2     | GAD  |  |
| 5422 | MAST4     | GEO  |  |
| 5423 | MAT2A     | Both |  |
| 5424 | MATN1     | GEO  |  |
| 5425 | MAU2      | GEO  |  |
| 5426 | MB        | GEO  |  |
| 5427 | MBD1      | GEO  |  |
| 5428 | MBD2      | GEO  |  |
| 5429 | MBD4      | GEO  |  |
| 5430 | MBD5      | GEO  |  |
| 5431 | MBIP      | GEO  |  |
| 5432 | MBL2      | GAD  |  |
| 5433 | MBNL2     | GEO  |  |
| 5434 | MBP       | GEO  |  |
| 5435 | MBTD1     | GEO  |  |
| 5436 | MC4R      | GAD  |  |
| 5437 | MC5R      | GEO  |  |
| 5438 | MCART1    | GEO  |  |
| 5439 | MCCC1     | GEO  |  |
| 5440 | MCFD2     | GEO  |  |
| 5441 | MCL1      | GEO  |  |
| 5442 | MCM2      | GEO  |  |
| 5443 | MCM3      | GEO  |  |
| 5444 | MCM3AP    | GEO  |  |
| 5445 | MCM4      | GEO  |  |
| 5446 | MCM7      | GEO  |  |
| 5447 | MCM8      | GEO  |  |
| 5448 | MCOLN2    | GEO  |  |

|      |          |      |  |
|------|----------|------|--|
| 5449 | MCOLN3   | GEO  |  |
| 5450 | MCPH1    | GEO  |  |
| 5451 | MCTP1    | GEO  |  |
| 5452 | MCTP2    | GEO  |  |
| 5453 | MDFI     | GEO  |  |
| 5454 | MDFIC    | GEO  |  |
| 5455 | MDGA1    | GEO  |  |
| 5456 | MDH1     | GEO  |  |
| 5457 | MDK      | Both |  |
| 5458 | MDM2     | Both |  |
| 5459 | MDM4     | GEO  |  |
| 5460 | MDS025   | GEO  |  |
| 5461 | MDS1     | GEO  |  |
| 5462 | ME1      | GEO  |  |
| 5463 | ME3      | GEO  |  |
| 5464 | MEAF6    | GEO  |  |
| 5465 | MECOM    | GEO  |  |
| 5466 | MED1     | GEO  |  |
| 5467 | MED10    | GEO  |  |
| 5468 | MED12L   | GEO  |  |
| 5469 | MED21    | GEO  |  |
| 5470 | MED25    | GEO  |  |
| 5471 | MED30    | GEO  |  |
| 5472 | MEF2A    | GEO  |  |
| 5473 | MEF2D    | GEO  |  |
| 5474 | MEFV     | GAD  |  |
| 5475 | MEG3     | GEO  |  |
| 5476 | MEGF6    | GEO  |  |
| 5477 | MEGF9    | GEO  |  |
| 5478 | MEIS3P1  | GEO  |  |
| 5479 | MEOX2    | GEO  |  |
| 5480 | MESDC1   | GEO  |  |
| 5481 | MESP2    | GEO  |  |
| 5482 | METTL10  | GEO  |  |
| 5483 | METTL11A | GEO  |  |
| 5484 | METTL13  | GEO  |  |
| 5485 | METTL2A  | GEO  |  |
| 5486 | METTL9   | GEO  |  |
| 5487 | MEX3A    | GEO  |  |
| 5488 | MEX3D    | GEO  |  |
| 5489 | MFAP4    | GEO  |  |
| 5490 | MFAP5    | GEO  |  |
| 5491 | MFGE8    | GEO  |  |
| 5492 | MF12     | GEO  |  |
| 5493 | MFSD10   | GEO  |  |
| 5494 | MFSD4    | GEO  |  |
| 5495 | MGA      | GEO  |  |
| 5496 | MGAM     | GEO  |  |
| 5497 | MGAT1    | GEO  |  |
| 5498 | MGC10233 | GEO  |  |

|      |          |      |  |
|------|----------|------|--|
| 5499 | MGC10981 | GEO  |  |
| 5500 | MGC11134 | GEO  |  |
| 5501 | MGC11242 | GEO  |  |
| 5502 | MGC12966 | GEO  |  |
| 5503 | MGC13053 | GEO  |  |
| 5504 | MGC16384 | GEO  |  |
| 5505 | MGC21881 | GEO  |  |
| 5506 | MGC22793 | GEO  |  |
| 5507 | MGC23985 | GEO  |  |
| 5508 | MGC24975 | GEO  |  |
| 5509 | MGC29506 | GEO  |  |
| 5510 | MGC3207  | GEO  |  |
| 5511 | MGC3234  | GEO  |  |
| 5512 | MGC33486 | GEO  |  |
| 5513 | MGC4171  | GEO  |  |
| 5514 | MGC4294  | GEO  |  |
| 5515 | MGC4308  | GEO  |  |
| 5516 | MGC45438 | GEO  |  |
| 5517 | MGC45800 | GEO  |  |
| 5518 | MGC48628 | GEO  |  |
| 5519 | MGC57346 | GEO  |  |
| 5520 | MGEA5    | GEO  |  |
| 5521 | MGMT     | GAD  |  |
| 5522 | MGP      | GEO  |  |
| 5523 | MGST1    | Both |  |
| 5524 | MGST3    | GEO  |  |
| 5525 | MHC      | GAD  |  |
| 5526 | MIA      | GEO  |  |
| 5527 | MIA2     | GEO  |  |
| 5528 | MIB1     | GEO  |  |
| 5529 | MIB2     | GEO  |  |
| 5530 | MICA     | GAD  |  |
| 5531 | MICALL1  | GEO  |  |
| 5532 | MID1IP1  | GEO  |  |
| 5533 | MID2     | GEO  |  |
| 5534 | MIER3    | GEO  |  |
| 5535 | MIF      | Both |  |
| 5536 | MINK1    | GEO  |  |
| 5537 | MIPEP    | GEO  |  |
| 5538 | MIR17HG  | GEO  |  |
| 5539 | MIR214   | GEO  |  |
| 5540 | MIRHG1   | GEO  |  |
| 5541 | MK167    | GEO  |  |
| 5542 | MKKS     | GEO  |  |
| 5543 | MKX      | GEO  |  |
| 5544 | MLEC     | GEO  |  |
| 5545 | MLF1     | GEO  |  |
| 5546 | MLH1     | GAD  |  |
| 5547 | MLH3     | GAD  |  |
| 5548 | MLKL     | GEO  |  |

|      |          |      |  |
|------|----------|------|--|
| 5549 | MLL      | GEO  |  |
| 5550 | MLL2     | GEO  |  |
| 5551 | MLL5     | GEO  |  |
| 5552 | MLLT4    | GEO  |  |
| 5553 | MLLT6    | GEO  |  |
| 5554 | MLXIP    | GEO  |  |
| 5555 | MLXIPL   | GEO  |  |
| 5556 | MMAB     | GEO  |  |
| 5557 | MMD2     | GAD  |  |
| 5558 | MMP10    | GEO  |  |
| 5559 | MMP13    | GEO  |  |
| 5560 | MMP17    | GEO  |  |
| 5561 | MMP19    | GEO  |  |
| 5562 | MMP2     | Both |  |
| 5563 | MMP23A   | GEO  |  |
| 5564 | MMP9     | Both |  |
| 5565 | MMRN1    | Both |  |
| 5566 | MMRN2    | GEO  |  |
| 5567 | MMS19    | GEO  |  |
| 5568 | MN1      | GEO  |  |
| 5569 | MNX1     | GEO  |  |
| 5570 | MOBKL2C  | GEO  |  |
| 5571 | MOBP     | GEO  |  |
| 5572 | MOCOS    | GAD  |  |
| 5573 | MOGAT2   | GEO  |  |
| 5574 | MOGAT3   | GEO  |  |
| 5575 | MON2     | GEO  |  |
| 5576 | MORF4L2  | GEO  |  |
| 5577 | MOSC2    | GEO  |  |
| 5578 | MOSPD1   | GEO  |  |
| 5579 | MOXD1    | GEO  |  |
| 5580 | MPDZ     | GEO  |  |
| 5581 | MPHOSPH8 | GEO  |  |
| 5582 | MPHOSPH9 | GEO  |  |
| 5583 | MPO      | GAD  |  |
| 5584 | MPP2     | GEO  |  |
| 5585 | MPP4     | GEO  |  |
| 5586 | MPP6     | GEO  |  |
| 5587 | MPRIP    | GEO  |  |
| 5588 | MPV17    | GEO  |  |
| 5589 | MPZL1    | GEO  |  |
| 5590 | MPZL3    | GEO  |  |
| 5591 | MR1      | GEO  |  |
| 5592 | MRAP2    | GEO  |  |
| 5593 | MRAS     | GEO  |  |
| 5594 | MRC2     | GEO  |  |
| 5595 | MRE11A   | GEO  |  |
| 5596 | MRFAP1   | GEO  |  |
| 5597 | MRGPRF   | GEO  |  |
| 5598 | MRGX3    | GEO  |  |

|      |         |      |  |
|------|---------|------|--|
| 5599 | M-RIP   | GEO  |  |
| 5600 | MRLC2   | GEO  |  |
| 5601 | MRP63   | GEO  |  |
| 5602 | MRPL11  | GEO  |  |
| 5603 | MRPL12  | GEO  |  |
| 5604 | MRPL13  | GEO  |  |
| 5605 | MRPL18  | GEO  |  |
| 5606 | MRPL20  | GEO  |  |
| 5607 | MRPL21  | GEO  |  |
| 5608 | MRPL34  | GEO  |  |
| 5609 | MRPL35  | GEO  |  |
| 5610 | MRPL39  | GEO  |  |
| 5611 | MRPS10  | GEO  |  |
| 5612 | MRPS17  | GEO  |  |
| 5613 | MRPS18C | GEO  |  |
| 5614 | MRPS22  | GEO  |  |
| 5615 | MRPS23  | GEO  |  |
| 5616 | MRPS31  | GEO  |  |
| 5617 | MRPS35  | GEO  |  |
| 5618 | MRPS5   | GEO  |  |
| 5619 | MRPS6   | GEO  |  |
| 5620 | MRV11   | GEO  |  |
| 5621 | MS      | GAD  |  |
| 5622 | MS4A4A  | GEO  |  |
| 5623 | MS4A5   | GEO  |  |
| 5624 | MS4A6A  | GEO  |  |
| 5625 | MS4A8B  | GEO  |  |
| 5626 | MSH2    | GAD  |  |
| 5627 | MSH3    | Both |  |
| 5628 | MSH6    | GAD  |  |
| 5629 | MSI1    | GEO  |  |
| 5630 | MSI2    | GEO  |  |
| 5631 | MSL1    | GEO  |  |
| 5632 | MSMB    | GEO  |  |
| 5633 | MSN     | GEO  |  |
| 5634 | MSRB2   | GEO  |  |
| 5635 | MSRB3   | GEO  |  |
| 5636 | MST1    | GAD  |  |
| 5637 | MST150  | GEO  |  |
| 5638 | MST1R   | GAD  |  |
| 5639 | MST4    | GEO  |  |
| 5640 | MSTO2P  | GEO  |  |
| 5641 | MSX1    | GEO  |  |
| 5642 | MT1G    | GEO  |  |
| 5643 | MT1JP   | GEO  |  |
| 5644 | MT1L    | GEO  |  |
| 5645 | MT1P2   | GEO  |  |
| 5646 | MT4     | GEO  |  |
| 5647 | MTA2    | GEO  |  |
| 5648 | MTCH1   | GEO  |  |

|      |         |      |  |
|------|---------|------|--|
| 5649 | MTCH2   | GEO  |  |
| 5650 | MT-CO1  | GAD  |  |
| 5651 | MT-CO2  | GAD  |  |
| 5652 | MTDH    | GEO  |  |
| 5653 | MTERFD1 | GEO  |  |
| 5654 | MTERFD2 | GEO  |  |
| 5655 | MTHFD1  | Both |  |
| 5656 | MTHFD2L | GEO  |  |
| 5657 | MTHFR   | GAD  |  |
| 5658 | MTHFS   | GAD  |  |
| 5659 | MTHFSD  | GEO  |  |
| 5660 | MTL5    | GEO  |  |
| 5661 | MTMR1   | GEO  |  |
| 5662 | MTMR10  | GEO  |  |
| 5663 | MTMR11  | GEO  |  |
| 5664 | MTMR2   | GEO  |  |
| 5665 | MTMR3   | GAD  |  |
| 5666 | MTMR6   | GEO  |  |
| 5667 | MTMR7   | GEO  |  |
| 5668 | MTR     | Both |  |
| 5669 | MTRF1L  | GEO  |  |
| 5670 | MTRR    | Both |  |
| 5671 | MTSS1   | GEO  |  |
| 5672 | MTTP    | GEO  |  |
| 5673 | MTUS1   | GEO  |  |
| 5674 | MTUS2   | GEO  |  |
| 5675 | MTX3    | GEO  |  |
| 5676 | MUC1    | GEO  |  |
| 5677 | MUC12   | GEO  |  |
| 5678 | MUC17   | GEO  |  |
| 5679 | MUC19   | GAD  |  |
| 5680 | MUC2    | GEO  |  |
| 5681 | MUC20   | GEO  |  |
| 5682 | MUC3A   | Both |  |
| 5683 | MUC3B   | GEO  |  |
| 5684 | MUC4    | GEO  |  |
| 5685 | MUC5AC  | GEO  |  |
| 5686 | MUC5B   | GEO  |  |
| 5687 | MUCDHL  | GEO  |  |
| 5688 | MUPCDH  | GEO  |  |
| 5689 | MUSTN1  | GEO  |  |
| 5690 | MUTYH   | GAD  |  |
| 5691 | MVP     | GEO  |  |
| 5692 | MXD3    | GEO  |  |
| 5693 | MXI1    | GEO  |  |
| 5694 | MYADM   | GEO  |  |
| 5695 | MYB     | GEO  |  |
| 5696 | MYBBP1A | GEO  |  |
| 5697 | MYBL1   | GEO  |  |
| 5698 | MYBL2   | GEO  |  |



|      |          |     |  |
|------|----------|-----|--|
| 5699 | MYBPC1   | GEO |  |
| 5700 | MYCBP2   | GEO |  |
| 5701 | MYCL1    | GAD |  |
| 5702 | MYEOV    | GEO |  |
| 5703 | MYEOV2   | GEO |  |
| 5704 | MYH1     | GAD |  |
| 5705 | MYH10    | GEO |  |
| 5706 | MYH14    | GEO |  |
| 5707 | MYL10    | GEO |  |
| 5708 | MYL4     | GEO |  |
| 5709 | MYL6     | GEO |  |
| 5710 | MYL6B    | GEO |  |
| 5711 | MYLK2    | GAD |  |
| 5712 | MYO10    | GEO |  |
| 5713 | MYO15B   | GEO |  |
| 5714 | MYO19    | GEO |  |
| 5715 | MYO1C    | GEO |  |
| 5716 | MYO1D    | GEO |  |
| 5717 | MYO1H    | GEO |  |
| 5718 | MYO3A    | GAD |  |
| 5719 | MYO7B    | GEO |  |
| 5720 | MYO9B    | GAD |  |
| 5721 | MYOCD    | GEO |  |
| 5722 | MYOF     | GEO |  |
| 5723 | MYOZ2    | GEO |  |
| 5724 | MYST3    | GEO |  |
| 5725 | MYT1     | GEO |  |
| 5726 | MZT2A    | GEO |  |
| 5727 | MZT2B    | GEO |  |
| 5728 | N4BP2    | GEO |  |
| 5729 | N4BP2L2  | GEO |  |
| 5730 | N4BP3    | GEO |  |
| 5731 | NA       | GAD |  |
| 5732 | NAA15    | GEO |  |
| 5733 | NAALADL1 | GEO |  |
| 5734 | NAALADL2 | GEO |  |
| 5735 | NAB1     | GEO |  |
| 5736 | NACAD    | GEO |  |
| 5737 | NACAP1   | GEO |  |
| 5738 | NACC1    | GEO |  |
| 5739 | NADK     | GEO |  |
| 5740 | NAGK     | GEO |  |
| 5741 | NAGS     | GEO |  |
| 5742 | NAIP     | GEO |  |
| 5743 | NALCN    | GEO |  |
| 5744 | NANS     | GEO |  |
| 5745 | NAP1L3   | GEO |  |
| 5746 | NAP1L4   | GEO |  |
| 5747 | NAPEPLD  | GEO |  |
| 5748 | NAPRT1   | GEO |  |

|      |             |      |  |
|------|-------------|------|--|
| 5749 | NAPSB       | GEO  |  |
| 5750 | NARG2       | GEO  |  |
| 5751 | NAT1        | GAD  |  |
| 5752 | NAT12       | GEO  |  |
| 5753 | NAT2        | Both |  |
| 5754 | NAT8        | GEO  |  |
| 5755 | NAV2        | GEO  |  |
| 5756 | NAV3        | GEO  |  |
| 5757 | NBEAL2      | GEO  |  |
| 5758 | NBLA00301   | GEO  |  |
| 5759 | NBN         | Both |  |
| 5760 | NBPF3       | GEO  |  |
| 5761 | NCALD       | GEO  |  |
| 5762 | NCAM2       | GEO  |  |
| 5763 | NCAPG2      | GEO  |  |
| 5764 | NCAPH       | GEO  |  |
| 5765 | NCBP1       | GEO  |  |
| 5766 | NCEH1       | GEO  |  |
| 5767 | NCF1        | GEO  |  |
| 5768 | NCF2        | GEO  |  |
| 5769 | NCF4        | Both |  |
| 5770 | NCL         | GEO  |  |
| 5771 | NCOA2       | GEO  |  |
| 5772 | NCOA3       | GEO  |  |
| 5773 | NCOA4       | GEO  |  |
| 5774 | NCOA7       | GEO  |  |
| 5775 | NCOR1       | GEO  |  |
| 5776 | NCOR2       | GEO  |  |
| 5777 | NCRNA00081  | GEO  |  |
| 5778 | NCRNA00152  | GEO  |  |
| 5779 | NCRNA00161  | GEO  |  |
| 5780 | NCRNA00182  | GEO  |  |
| 5781 | NCRNA00185  | GEO  |  |
| 5782 | NCRNA00238  | GEO  |  |
| 5783 | NCRNA00253  | GEO  |  |
| 5784 | NCRNA00260  | GEO  |  |
| 5785 | NCRNA00261  | GEO  |  |
| 5786 | NCRNA00286A | GEO  |  |
| 5787 | NCRNA00294  | GEO  |  |
| 5788 | NCS1        | GEO  |  |
| 5789 | ND1         | GAD  |  |
| 5790 | ND2         | GAD  |  |
| 5791 | ND3         | Both |  |
| 5792 | ND4         | GAD  |  |
| 5793 | ND4L        | GAD  |  |
| 5794 | ND5         | GAD  |  |
| 5795 | ND6         | GAD  |  |
| 5796 | NDE1        | GEO  |  |
| 5797 | NDFIP2      | GEO  |  |
| 5798 | NDRG1       | GAD  |  |

|      |          |      |  |
|------|----------|------|--|
| 5799 | NDRG4    | GEO  |  |
| 5800 | NDST3    | GAD  |  |
| 5801 | NDUFA10  | GEO  |  |
| 5802 | NDUFA11  | GEO  |  |
| 5803 | NDUFAB1  | GAD  |  |
| 5804 | NDUFAF4  | GEO  |  |
| 5805 | NDUFB8   | GEO  |  |
| 5806 | NDUFS3   | GEO  |  |
| 5807 | NDUFS4   | GEO  |  |
| 5808 | NDUFV1   | GEO  |  |
| 5809 | NEAT1    | GEO  |  |
| 5810 | NEB      | GEO  |  |
| 5811 | NEDD8    | GEO  |  |
| 5812 | NEFH     | GEO  |  |
| 5813 | NEIL1    | Both |  |
| 5814 | NEIL2    | GAD  |  |
| 5815 | NEIL3    | Both |  |
| 5816 | NEK1     | GEO  |  |
| 5817 | NEK11    | GEO  |  |
| 5818 | NEK3     | GEO  |  |
| 5819 | NEK9     | GEO  |  |
| 5820 | NELF     | GEO  |  |
| 5821 | NELL1    | GAD  |  |
| 5822 | NELL2    | GEO  |  |
| 5823 | NENF     | GEO  |  |
| 5824 | NEO1     | GEO  |  |
| 5825 | NES      | GEO  |  |
| 5826 | NETO2    | GEO  |  |
| 5827 | NEU4     | GEO  |  |
| 5828 | NEURL1B  | GEO  |  |
| 5829 | NEURL2   | GEO  |  |
| 5830 | NEURL3   | GEO  |  |
| 5831 | NEUROG3  | GEO  |  |
| 5832 | NF1      | GEO  |  |
| 5833 | NFATC1   | GEO  |  |
| 5834 | NFATC2IP | GEO  |  |
| 5835 | NFE2     | GEO  |  |
| 5836 | NFE2L2   | GAD  |  |
| 5837 | NFIC     | GEO  |  |
| 5838 | NFKB1    | GAD  |  |
| 5839 | NFKB1A   | Both |  |
| 5840 | NFKB1B   | GEO  |  |
| 5841 | NFKB1E   | GEO  |  |
| 5842 | NFKB1L1  | GAD  |  |
| 5843 | NFKB1Z   | GEO  |  |
| 5844 | NFS1     | GEO  |  |
| 5845 | NFX1     | GEO  |  |
| 5846 | NFXL1    | GEO  |  |
| 5847 | NFYB     | GEO  |  |
| 5848 | NGDN     | GEO  |  |

|      |           |      |  |
|------|-----------|------|--|
| 5849 | NGEF      | GEO  |  |
| 5850 | NGFR      | GEO  |  |
| 5851 | NGFRAP1   | GEO  |  |
| 5852 | NGLY1     | GEO  |  |
| 5853 | NGRN      | GEO  |  |
| 5854 | NHEDC2    | GEO  |  |
| 5855 | NHLRC2    | GEO  |  |
| 5856 | NHP2      | GEO  |  |
| 5857 | NHP2L1    | GEO  |  |
| 5858 | NHSL1     | GEO  |  |
| 5859 | NICN1     | GAD  |  |
| 5860 | NID1      | GEO  |  |
| 5861 | NINJ1     | GEO  |  |
| 5862 | NINJ2     | GEO  |  |
| 5863 | NINL      | GEO  |  |
| 5864 | NIPAL2    | GEO  |  |
| 5865 | NIPAL3    | GEO  |  |
| 5866 | NIPSNAP1  | GEO  |  |
| 5867 | NIT2      | GEO  |  |
| 5868 | NKAP      | GAD  |  |
| 5869 | NKIRAS1   | GEO  |  |
| 5870 | NKTR      | GEO  |  |
| 5871 | NKX2      | GAD  |  |
| 5872 | NKX2-3    | Both |  |
| 5873 | NKX3      | GAD  |  |
| 5874 | NLGN3     | GEO  |  |
| 5875 | NLGN4X    | GEO  |  |
| 5876 | NLGN4Y    | GEO  |  |
| 5877 | NLK       | GAD  |  |
| 5878 | NLRC3     | GEO  |  |
| 5879 | NLRC5     | GEO  |  |
| 5880 | NLRP1     | Both |  |
| 5881 | NLRP10    | GAD  |  |
| 5882 | NLRP11    | Both |  |
| 5883 | NLRP12    | GAD  |  |
| 5884 | NLRP13    | GAD  |  |
| 5885 | NLRP14    | GAD  |  |
| 5886 | NLRP3     | GAD  |  |
| 5887 | NLRP4     | GAD  |  |
| 5888 | NLRP5     | GAD  |  |
| 5889 | NLRP6     | GAD  |  |
| 5890 | NLRP7     | GAD  |  |
| 5891 | NLRP8     | GAD  |  |
| 5892 | NLRP9     | GAD  |  |
| 5893 | NME1      | GAD  |  |
| 5894 | NME1-NME2 | GEO  |  |
| 5895 | NME3      | GEO  |  |
| 5896 | NME4      | GEO  |  |
| 5897 | NME7      | GEO  |  |
| 5898 | NMES1     | GEO  |  |

|      |            |      |  |
|------|------------|------|--|
| 5899 | NMNAT3     | GEO  |  |
| 5900 | NMT2       | GEO  |  |
| 5901 | NNAT       | GEO  |  |
| 5902 | NNT        | GEO  |  |
| 5903 | NOB1       | GEO  |  |
| 5904 | NOC2L      | GEO  |  |
| 5905 | NOD1       | GAD  |  |
| 5906 | NODAL      | GEO  |  |
| 5907 | NOL3       | GEO  |  |
| 5908 | NOL5A      | GEO  |  |
| 5909 | NOL6       | GEO  |  |
| 5910 | NOL8       | GEO  |  |
| 5911 | NOL9       | GEO  |  |
| 5912 | NOLC1      | GEO  |  |
| 5913 | NOP16      | GEO  |  |
| 5914 | NOP2       | GEO  |  |
| 5915 | NOP5/NOP58 | GEO  |  |
| 5916 | NOS1       | Both |  |
| 5917 | NOS2       | GEO  |  |
| 5918 | NOS2A      | Both |  |
| 5919 | NOS3       | Both |  |
| 5920 | NOTCH1     | GEO  |  |
| 5921 | NOTCH2NL   | GEO  |  |
| 5922 | NOTCH3     | GEO  |  |
| 5923 | NOTUM      | GEO  |  |
| 5924 | NOVA1      | GEO  |  |
| 5925 | NOX1       | GEO  |  |
| 5926 | NOX4       | GEO  |  |
| 5927 | NOXO1      | GEO  |  |
| 5928 | NPAS2      | GEO  |  |
| 5929 | NPAS3      | GEO  |  |
| 5930 | NPC1       | GEO  |  |
| 5931 | NPC1L1     | GEO  |  |
| 5932 | NPC2       | GEO  |  |
| 5933 | NPDC1      | GEO  |  |
| 5934 | NPHP1      | GEO  |  |
| 5935 | NPIP       | GEO  |  |
| 5936 | NPIPL3     | GEO  |  |
| 5937 | NPL        | GEO  |  |
| 5938 | NPLOC4     | GEO  |  |
| 5939 | NPM1       | GEO  |  |
| 5940 | NPR1       | GEO  |  |
| 5941 | NPR2       | GEO  |  |
| 5942 | NPSR1      | GAD  |  |
| 5943 | NPTXR      | GEO  |  |
| 5944 | NPVF       | GEO  |  |
| 5945 | NPW        | GEO  |  |
| 5946 | NPY        | GEO  |  |
| 5947 | NPY1R      | GEO  |  |
| 5948 | NPY6R      | GEO  |  |

|      |         |      |  |
|------|---------|------|--|
| 5949 | NQO1    | Both |  |
| 5950 | NQO2    | GEO  |  |
| 5951 | NR0B1   | GEO  |  |
| 5952 | NR1D1   | GEO  |  |
| 5953 | NR1D2   | GEO  |  |
| 5954 | NR1H3   | GAD  |  |
| 5955 | NR1H4   | GEO  |  |
| 5956 | NR1I2   | Both |  |
| 5957 | NR4A1   | GEO  |  |
| 5958 | NR6A1   | GEO  |  |
| 5959 | NRAMP   | GAD  |  |
| 5960 | NRAP    | GEO  |  |
| 5961 | NRARP   | GEO  |  |
| 5962 | NRAS    | Both |  |
| 5963 | NRBP2   | GEO  |  |
| 5964 | NRG1    | GEO  |  |
| 5965 | NRG2    | GEO  |  |
| 5966 | NRG4    | GEO  |  |
| 5967 | NRIP1   | GEO  |  |
| 5968 | NRIP3   | GEO  |  |
| 5969 | NRK     | GEO  |  |
| 5970 | NRN1    | GEO  |  |
| 5971 | NRP2    | GEO  |  |
| 5972 | NRXN1   | GEO  |  |
| 5973 | NSA2    | GEO  |  |
| 5974 | NSD1    | GEO  |  |
| 5975 | NSFL1C  | GEO  |  |
| 5976 | NSG1    | GEO  |  |
| 5977 | NSMAF   | GEO  |  |
| 5978 | NSUN5P1 | GEO  |  |
| 5979 | NSUN7   | GEO  |  |
| 5980 | NT5DC1  | GEO  |  |
| 5981 | NT5DC2  | GEO  |  |
| 5982 | NT5E    | Both |  |
| 5983 | NT5M    | GEO  |  |
| 5984 | NTAN1   | GEO  |  |
| 5985 | NTHL1   | GAD  |  |
| 5986 | NTM     | GEO  |  |
| 5987 | NTN1    | GEO  |  |
| 5988 | NTN2L   | GEO  |  |
| 5989 | NTN4    | GEO  |  |
| 5990 | NTN5    | GEO  |  |
| 5991 | NTNG2   | GEO  |  |
| 5992 | NTRK2   | GEO  |  |
| 5993 | NTS     | GEO  |  |
| 5994 | NTSR1   | GEO  |  |
| 5995 | NUAK1   | GEO  |  |
| 5996 | NUB1    | GEO  |  |
| 5997 | NUDC    | GEO  |  |
| 5998 | NUDCD1  | GEO  |  |

|      |        |      |  |
|------|--------|------|--|
| 5999 | NUDCD2 | GEO  |  |
| 6000 | NUDT1  | Both |  |
| 6001 | NUDT12 | GEO  |  |
| 6002 | NUDT5  | GEO  |  |
| 6003 | NUDT6  | GEO  |  |
| 6004 | NUDT7  | GEO  |  |
| 6005 | NUDT9  | GEO  |  |
| 6006 | NUFIP1 | GEO  |  |
| 6007 | NUP107 | GEO  |  |
| 6008 | NUP205 | GEO  |  |
| 6009 | NUP37  | GEO  |  |
| 6010 | NUP85  | GEO  |  |
| 6011 | NUPL1  | GEO  |  |
| 6012 | NUPR1  | Both |  |
| 6013 | NUTF2  | GEO  |  |
| 6014 | NXF1   | GEO  |  |
| 6015 | NXF3   | GEO  |  |
| 6016 | NXN    | GEO  |  |
| 6017 | NXPH4  | GEO  |  |
| 6018 | OAS1   | GEO  |  |
| 6019 | OAS3   | GEO  |  |
| 6020 | OAT    | GEO  |  |
| 6021 | OAZ2   | GEO  |  |
| 6022 | OAZ3   | GEO  |  |
| 6023 | OBFC2A | GEO  |  |
| 6024 | OBSL1  | GEO  |  |
| 6025 | OCIAD2 | GEO  |  |
| 6026 | OCLN   | GEO  |  |
| 6027 | OCSP   | GEO  |  |
| 6028 | OCTN3  | GAD  |  |
| 6029 | ODC1   | Both |  |
| 6030 | ODF3B  | GEO  |  |
| 6031 | ODZ2   | GEO  |  |
| 6032 | ODZ3   | GEO  |  |
| 6033 | OFCC1  | GEO  |  |
| 6034 | OGDH   | GEO  |  |
| 6035 | OGG1   | GAD  |  |
| 6036 | OGN    | GEO  |  |
| 6037 | OGT    | GEO  |  |
| 6038 | OIP5   | GEO  |  |
| 6039 | OIT3   | GEO  |  |
| 6040 | OLA1   | GEO  |  |
| 6041 | OLFM1  | GEO  |  |
| 6042 | OLFM4  | GEO  |  |
| 6043 | OLFML3 | GEO  |  |
| 6044 | OLIG3  | GAD  |  |
| 6045 | OLR1   | GEO  |  |
| 6046 | OPCML  | GEO  |  |
| 6047 | OPRM1  | GAD  |  |
| 6048 | OPTN   | GEO  |  |

|      |           |      |  |
|------|-----------|------|--|
| 6049 | OR10D1P   | GEO  |  |
| 6050 | OR2B3     | GEO  |  |
| 6051 | OR2H2     | GEO  |  |
| 6052 | OR2S2     | GEO  |  |
| 6053 | OR4N4     | GEO  |  |
| 6054 | OR51E2    | GEO  |  |
| 6055 | OR51I1    | GEO  |  |
| 6056 | ORAI2     | GEO  |  |
| 6057 | ORF1-FL49 | GEO  |  |
| 6058 | ORM1      | GEO  |  |
| 6059 | ORM2      | GEO  |  |
| 6060 | ORMDL2    | GEO  |  |
| 6061 | ORMDL3    | GAD  |  |
| 6062 | OS9       | GAD  |  |
| 6063 | OSBP2     | GEO  |  |
| 6064 | OSGIN1    | GEO  |  |
| 6065 | OSMR      | GEO  |  |
| 6066 | OSTalpha  | GEO  |  |
| 6067 | OSTF1     | GEO  |  |
| 6068 | OSTM1     | GEO  |  |
| 6069 | OTC       | GEO  |  |
| 6070 | OTOP2     | GEO  |  |
| 6071 | OTOR      | GEO  |  |
| 6072 | OTUB1     | GEO  |  |
| 6073 | OTUD3     | GAD  |  |
| 6074 | OVOL1     | GEO  |  |
| 6075 | OVOL2     | GEO  |  |
| 6076 | OXCT1     | GEO  |  |
| 6077 | OXGR1     | GEO  |  |
| 6078 | OXR1      | GEO  |  |
| 6079 | OXTR      | GEO  |  |
| 6080 | P2RX1     | GEO  |  |
| 6081 | P2RX4     | GEO  |  |
| 6082 | P2RX5     | GEO  |  |
| 6083 | P2RX7     | Both |  |
| 6084 | P2RY1     | GEO  |  |
| 6085 | P2RY12    | GEO  |  |
| 6086 | P2RY13    | GEO  |  |
| 6087 | P2RY14    | GEO  |  |
| 6088 | P4HA2     | Both |  |
| 6089 | PABPN1    | GEO  |  |
| 6090 | PACRG     | GEO  |  |
| 6091 | PACSIN1   | GEO  |  |
| 6092 | PADI1     | GEO  |  |
| 6093 | PADI4     | GAD  |  |
| 6094 | PAFAH1B1  | GEO  |  |
| 6095 | PAFAH1B3  | GEO  |  |
| 6096 | PAFAH2    | GEO  |  |
| 6097 | PAIP2B    | GEO  |  |
| 6098 | PAK1      | GEO  |  |

|      |        |     |  |
|------|--------|-----|--|
| 6099 | PAK3   | GEO |  |
| 6100 | PAK4   | GEO |  |
| 6101 | PAK6   | GEO |  |
| 6102 | PALB2  | GAD |  |
| 6103 | PALLD  | GEO |  |
| 6104 | PALM   | GEO |  |
| 6105 | PALM3  | GEO |  |
| 6106 | PALMD  | GEO |  |
| 6107 | PAMR1  | GEO |  |
| 6108 | PAN3   | GEO |  |
| 6109 | PANX2  | GEO |  |
| 6110 | PAOX   | GEO |  |
| 6111 | PAQR3  | GEO |  |
| 6112 | PAQR4  | GEO |  |
| 6113 | PAQR6  | GEO |  |
| 6114 | PAQR7  | GEO |  |
| 6115 | PARD3  | GEO |  |
| 6116 | PARD6B | GEO |  |
| 6117 | PARD6G | GEO |  |
| 6118 | PARL   | GEO |  |
| 6119 | PARM1  | GEO |  |
| 6120 | PARN   | GEO |  |
| 6121 | PARP1  | GAD |  |
| 6122 | PARP10 | GEO |  |
| 6123 | PARP4  | GAD |  |
| 6124 | PARP9  | GEO |  |
| 6125 | PART1  | GEO |  |
| 6126 | PARVA  | GEO |  |
| 6127 | PARVB  | GEO |  |
| 6128 | PARVG  | GEO |  |
| 6129 | PASD1  | GEO |  |
| 6130 | PASK   | GEO |  |
| 6131 | PATE1  | GEO |  |
| 6132 | PATZ1  | GEO |  |
| 6133 | PAX1   | GEO |  |
| 6134 | PAX2   | GEO |  |
| 6135 | PBRM1  | GEO |  |
| 6136 | PBX1   | GEO |  |
| 6137 | PBX2   | GEO |  |
| 6138 | PCBP3  | GEO |  |
| 6139 | PCCA   | GEO |  |
| 6140 | PCDH1  | GEO |  |
| 6141 | PCDH12 | GEO |  |
| 6142 | PCDH18 | GEO |  |
| 6143 | PCDH19 | GEO |  |
| 6144 | PCDH20 | GEO |  |
| 6145 | PCDH7  | GEO |  |
| 6146 | PCDH9  | GEO |  |
| 6147 | PCDHA1 | GEO |  |
| 6148 | PCDHA4 | GEO |  |

|      |          |      |  |
|------|----------|------|--|
| 6149 | PCDHA6   | GEO  |  |
| 6150 | PCDHGA1  | GEO  |  |
| 6151 | PCDHGA3  | GEO  |  |
| 6152 | PCF11    | GEO  |  |
| 6153 | PCGF5    | GEO  |  |
| 6154 | PCID2    | GEO  |  |
| 6155 | PCM1     | GEO  |  |
| 6156 | PCNA     | GAD  |  |
| 6157 | PCNX     | GEO  |  |
| 6158 | PCNXL3   | GEO  |  |
| 6159 | PCP4     | GEO  |  |
| 6160 | PCSK1    | GEO  |  |
| 6161 | PCSK1N   | GEO  |  |
| 6162 | PCSK2    | GEO  |  |
| 6163 | PCSK5    | GEO  |  |
| 6164 | PCSK7    | GEO  |  |
| 6165 | PCSK9    | GEO  |  |
| 6166 | PCTP     | GEO  |  |
| 6167 | PDAP1    | GEO  |  |
| 6168 | PDCD1    | Both |  |
| 6169 | PDCD1LG2 | GAD  |  |
| 6170 | PDCD2    | GEO  |  |
| 6171 | PDCD2L   | GEO  |  |
| 6172 | PDE12    | GEO  |  |
| 6173 | PDE1A    | GEO  |  |
| 6174 | PDE4A    | GEO  |  |
| 6175 | PDE4B    | GEO  |  |
| 6176 | PDE4DIP  | GEO  |  |
| 6177 | PDE5A    | GEO  |  |
| 6178 | PDE6A    | GEO  |  |
| 6179 | PDE6B    | GEO  |  |
| 6180 | PDE7B    | GEO  |  |
| 6181 | PDGFA    | GEO  |  |
| 6182 | PDGFC    | GEO  |  |
| 6183 | PDGFD    | GEO  |  |
| 6184 | PDGFRB   | GEO  |  |
| 6185 | PDHA1    | GEO  |  |
| 6186 | PDHB     | GEO  |  |
| 6187 | PDIA3    | GEO  |  |
| 6188 | PDIA4    | GEO  |  |
| 6189 | PDK1     | Both |  |
| 6190 | PDK3     | GEO  |  |
| 6191 | PDLIM1   | Both |  |
| 6192 | PDLIM2   | GEO  |  |
| 6193 | PDLIM4   | GEO  |  |
| 6194 | PDLIM5   | GEO  |  |
| 6195 | PDLIM7   | GEO  |  |
| 6196 | PDP1     | GEO  |  |
| 6197 | PDPK1    | GEO  |  |
| 6198 | PDPR     | GEO  |  |

|      |          |      |  |
|------|----------|------|--|
| 6199 | PDS5A    | GEO  |  |
| 6200 | PDSS1    | GEO  |  |
| 6201 | PDSS2    | GEO  |  |
| 6202 | PDXP     | GEO  |  |
| 6203 | PDZD3    | GEO  |  |
| 6204 | PDZD7    | GEO  |  |
| 6205 | PDZK1    | GEO  |  |
| 6206 | PDZK1IP1 | GEO  |  |
| 6207 | PDZK1P1  | GEO  |  |
| 6208 | PDZRN3   | GEO  |  |
| 6209 | PDZRN4   | GEO  |  |
| 6210 | PEA15    | GEO  |  |
| 6211 | PEAR1    | GEO  |  |
| 6212 | PEBP1    | GEO  |  |
| 6213 | PEBP4    | GEO  |  |
| 6214 | PECAM1   | Both |  |
| 6215 | PECR     | GEO  |  |
| 6216 | PEF1     | GEO  |  |
| 6217 | PEG3     | GEO  |  |
| 6218 | PELO     | GEO  |  |
| 6219 | PEO1     | GEO  |  |
| 6220 | PER1     | GEO  |  |
| 6221 | PER2     | GEO  |  |
| 6222 | PER3     | GEO  |  |
| 6223 | PET112L  | GEO  |  |
| 6224 | PEX11A   | GEO  |  |
| 6225 | PEX12    | GEO  |  |
| 6226 | PEX13    | GEO  |  |
| 6227 | PEX2     | GEO  |  |
| 6228 | PEX26    | GEO  |  |
| 6229 | PFAS     | GEO  |  |
| 6230 | PFDN2    | GEO  |  |
| 6231 | PFDN4    | GEO  |  |
| 6232 | PFDN5    | GEO  |  |
| 6233 | PFKFB1   | GEO  |  |
| 6234 | PFKFB3   | GEO  |  |
| 6235 | PFKFB4   | GEO  |  |
| 6236 | PFKP     | GEO  |  |
| 6237 | PGAM1    | GEO  |  |
| 6238 | PGAM2    | GEO  |  |
| 6239 | PGAP1    | GEO  |  |
| 6240 | PGBD1    | GEO  |  |
| 6241 | PGBD5    | GEO  |  |
| 6242 | PGCP     | GEO  |  |
| 6243 | PGDS     | GEO  |  |
| 6244 | PGK2     | GEO  |  |
| 6245 | PGM1     | GEO  |  |
| 6246 | PGM2     | GEO  |  |
| 6247 | PGM5P2   | GEO  |  |
| 6248 | PGR      | GAD  |  |

|      |         |     |  |
|------|---------|-----|--|
| 6249 | PHACTR1 | GEO |  |
| 6250 | PHC2    | GEO |  |
| 6251 | PHC3    | GEO |  |
| 6252 | PHEX    | GEO |  |
| 6253 | PHF11   | GEO |  |
| 6254 | PHF13   | GEO |  |
| 6255 | PHF14   | GEO |  |
| 6256 | PHF15   | GEO |  |
| 6257 | PHF2    | GEO |  |
| 6258 | PHF20L1 | GEO |  |
| 6259 | PHF6    | GEO |  |
| 6260 | PHF7    | GEO |  |
| 6261 | PHGR1   | GEO |  |
| 6262 | PHIP    | GEO |  |
| 6263 | PHKA1   | GEO |  |
| 6264 | PHKA2   | GEO |  |
| 6265 | PHKB    | GEO |  |
| 6266 | PHLDA2  | GEO |  |
| 6267 | PHLDA3  | GEO |  |
| 6268 | PHLPPL  | GEO |  |
| 6269 | PHOX2B  | GAD |  |
| 6270 | PHPT1   | GEO |  |
| 6271 | PHTF1   | GEO |  |
| 6272 | PHTF2   | GEO |  |
| 6273 | PI15    | GEO |  |
| 6274 | PI16    | GEO |  |
| 6275 | PI3     | GEO |  |
| 6276 | PI4K2B  | GEO |  |
| 6277 | PIAS1   | GEO |  |
| 6278 | PIAS3   | GEO |  |
| 6279 | PIBF1   | GEO |  |
| 6280 | PICALM  | GEO |  |
| 6281 | PICK1   | GEO |  |
| 6282 | PIGG    | GEO |  |
| 6283 | PIGH    | GEO |  |
| 6284 | PIGL    | GEO |  |
| 6285 | PIGN    | GEO |  |
| 6286 | PIGQ    | GEO |  |
| 6287 | PIGS    | GEO |  |
| 6288 | PIGU    | GEO |  |
| 6289 | PIGZ    | GEO |  |
| 6290 | PIK3C2A | GEO |  |
| 6291 | PIK3C2B | GEO |  |
| 6292 | PIK3C3  | GEO |  |
| 6293 | PIK3CA  | GAD |  |
| 6294 | PIK3R2  | GEO |  |
| 6295 | PIK3R4  | GEO |  |
| 6296 | PIK3R5  | GEO |  |
| 6297 | PIM1    | GEO |  |
| 6298 | PIM2    | GEO |  |

|      |          |      |  |
|------|----------|------|--|
| 6299 | PINK1    | GEO  |  |
| 6300 | PION     | GEO  |  |
| 6301 | PIP5K1A  | GEO  |  |
| 6302 | PIP5K1B  | GEO  |  |
| 6303 | PIP5K1C  | GEO  |  |
| 6304 | PIPOX    | GEO  |  |
| 6305 | PIR      | GEO  |  |
| 6306 | PITPNB   | GEO  |  |
| 6307 | PITPNC1  | GEO  |  |
| 6308 | PITPNM2  | GEO  |  |
| 6309 | PITPNM3  | GEO  |  |
| 6310 | PITX2    | GEO  |  |
| 6311 | PIWIL1   | GEO  |  |
| 6312 | PIWIL4   | GEO  |  |
| 6313 | PKD1     | GEO  |  |
| 6314 | PKD1L3   | GEO  |  |
| 6315 | PKD1P1   | GEO  |  |
| 6316 | PKD2     | GEO  |  |
| 6317 | PKDCC    | GEO  |  |
| 6318 | PKHD1L1  | GEO  |  |
| 6319 | PKIA     | GEO  |  |
| 6320 | PKIG     | GEO  |  |
| 6321 | PKLR     | GEO  |  |
| 6322 | PKM2     | GEO  |  |
| 6323 | PKN1     | GEO  |  |
| 6324 | PKN2     | GEO  |  |
| 6325 | PKNOX1   | GEO  |  |
| 6326 | PKNOX2   | GEO  |  |
| 6327 | PKP1     | GEO  |  |
| 6328 | PKP2     | GEO  |  |
| 6329 | PKP4     | GEO  |  |
| 6330 | PLA1A    | GEO  |  |
| 6331 | PLA2G12B | GEO  |  |
| 6332 | PLA2G2A  | Both |  |
| 6333 | PLA2G2D  | GEO  |  |
| 6334 | PLA2G2E  | GAD  |  |
| 6335 | PLA2G3   | GEO  |  |
| 6336 | PLA2G6   | GEO  |  |
| 6337 | PLA2G7   | Both |  |
| 6338 | PLA2R1   | GEO  |  |
| 6339 | PLAB     | GAD  |  |
| 6340 | PLAC1    | GEO  |  |
| 6341 | PLAC2    | GEO  |  |
| 6342 | PLAC4    | GEO  |  |
| 6343 | PLAGL2   | GEO  |  |
| 6344 | PLAT     | Both |  |
| 6345 | PLBD1    | GEO  |  |
| 6346 | PLCB4    | GEO  |  |
| 6347 | PLCD1    | GEO  |  |
| 6348 | PLCG2    | GEO  |  |

|      |          |     |  |
|------|----------|-----|--|
| 6349 | PLCH1    | GEO |  |
| 6350 | PLCL1    | GEO |  |
| 6351 | PLCL3    | GEO |  |
| 6352 | PLCXD2   | GEO |  |
| 6353 | PLCXD3   | GEO |  |
| 6354 | PLD2     | GAD |  |
| 6355 | PLD6     | GEO |  |
| 6356 | PLEC     | GEO |  |
| 6357 | PLEK     | GEO |  |
| 6358 | PLEK2    | GEO |  |
| 6359 | PLEKHA4  | GEO |  |
| 6360 | PLEKHA6  | GEO |  |
| 6361 | PLEKHA7  | GEO |  |
| 6362 | PLEKHG1  | GEO |  |
| 6363 | PLEKHG2  | GEO |  |
| 6364 | PLEKHG4  | GEO |  |
| 6365 | PLEKHG5  | GEO |  |
| 6366 | PLEKHH1  | GEO |  |
| 6367 | PLEKHJ1  | GEO |  |
| 6368 | PLEKHO1  | GEO |  |
| 6369 | PLIN     | GEO |  |
| 6370 | PLIN1    | GEO |  |
| 6371 | PLIN2    | GEO |  |
| 6372 | PLIN4    | GEO |  |
| 6373 | PLIN5    | GEO |  |
| 6374 | PLK1     | GEO |  |
| 6375 | PLK2     | GEO |  |
| 6376 | PLN      | GEO |  |
| 6377 | PLOD3    | GEO |  |
| 6378 | PLS3     | GEO |  |
| 6379 | PLSCR1   | GEO |  |
| 6380 | PLSCR4   | GEO |  |
| 6381 | PLTP     | GEO |  |
| 6382 | PLVAP    | GEO |  |
| 6383 | PLXDC1   | GEO |  |
| 6384 | PLXNA1   | GEO |  |
| 6385 | PLXNA2   | GEO |  |
| 6386 | PLXNB1   | GEO |  |
| 6387 | PLXND1   | GEO |  |
| 6388 | PM20D2   | GEO |  |
| 6389 | PMFBP1   | GEO |  |
| 6390 | PMP2     | GEO |  |
| 6391 | PMP22    | GEO |  |
| 6392 | PMS1     | GAD |  |
| 6393 | PMS2     | GAD |  |
| 6394 | PMS2CL   | GEO |  |
| 6395 | PNCK     | GEO |  |
| 6396 | PNKP     | GAD |  |
| 6397 | PNLIPRP2 | GEO |  |
| 6398 | PNMA1    | GEO |  |

|      |          |      |  |
|------|----------|------|--|
| 6399 | PNMA2    | GEO  |  |
| 6400 | PNMAL1   | GEO  |  |
| 6401 | PNN      | GEO  |  |
| 6402 | PNP      | GEO  |  |
| 6403 | PNPLA3   | GEO  |  |
| 6404 | PNPLA6   | GEO  |  |
| 6405 | PNPLA8   | GEO  |  |
| 6406 | PNPT1    | GEO  |  |
| 6407 | POFUT1   | GEO  |  |
| 6408 | POFUT2   | GAD  |  |
| 6409 | POLA1    | GEO  |  |
| 6410 | POLB     | GAD  |  |
| 6411 | POLI     | GEO  |  |
| 6412 | POLN     | GEO  |  |
| 6413 | POLQ     | GEO  |  |
| 6414 | POLR1C   | GEO  |  |
| 6415 | POLR1D   | GEO  |  |
| 6416 | POLR2B   | GEO  |  |
| 6417 | POLR2E   | GEO  |  |
| 6418 | POLR2I   | GEO  |  |
| 6419 | POLR2J2  | GEO  |  |
| 6420 | POLR2L   | GEO  |  |
| 6421 | POLR3F   | GEO  |  |
| 6422 | POLR3G   | GEO  |  |
| 6423 | POM121   | GEO  |  |
| 6424 | POMC     | GAD  |  |
| 6425 | POMP     | GEO  |  |
| 6426 | POMT2    | GEO  |  |
| 6427 | PON1     | GAD  |  |
| 6428 | PON2     | GAD  |  |
| 6429 | PON3     | GEO  |  |
| 6430 | POPDC2   | GEO  |  |
| 6431 | POPDC3   | GEO  |  |
| 6432 | POR      | GEO  |  |
| 6433 | PORCN    | GEO  |  |
| 6434 | POU2AF1  | Both |  |
| 6435 | POU2F1   | GAD  |  |
| 6436 | POU5FIP1 | GAD  |  |
| 6437 | POU6F1   | GEO  |  |
| 6438 | pp9099   | GEO  |  |
| 6439 | PPA1     | GEO  |  |
| 6440 | PPAP2B   | GEO  |  |
| 6441 | PPARA    | GEO  |  |
| 6442 | PPARD    | GAD  |  |
| 6443 | PPARG    | Both |  |
| 6444 | PPARGC1A | Both |  |
| 6445 | PPFIA1   | GEO  |  |
| 6446 | PPFIA3   | GEO  |  |
| 6447 | PPFIBP1  | GEO  |  |
| 6448 | PPHLN1   | GEO  |  |

|      |          |      |  |
|------|----------|------|--|
| 6449 | PPIA     | GEO  |  |
| 6450 | PPIB     | GEO  |  |
| 6451 | PPIEL    | GEO  |  |
| 6452 | PPIG     | GEO  |  |
| 6453 | PPIH     | GEO  |  |
| 6454 | PPIL3    | GEO  |  |
| 6455 | PPM1F    | GEO  |  |
| 6456 | PPM1M    | GEO  |  |
| 6457 | PPP1CB   | GEO  |  |
| 6458 | PPP1R12B | GEO  |  |
| 6459 | PPP1R12C | GEO  |  |
| 6460 | PPP1R13B | GEO  |  |
| 6461 | PPP1R13L | GAD  |  |
| 6462 | PPP1R14A | GEO  |  |
| 6463 | PPP1R14D | GEO  |  |
| 6464 | PPP1R15A | GEO  |  |
| 6465 | PPP1R1B  | GEO  |  |
| 6466 | PPP1R3A  | GAD  |  |
| 6467 | PPP1R3B  | GEO  |  |
| 6468 | PPP1R3C  | GEO  |  |
| 6469 | PPP1R3D  | GEO  |  |
| 6470 | PPP1R9A  | GEO  |  |
| 6471 | PPP2CB   | GEO  |  |
| 6472 | PPP3CA   | GEO  |  |
| 6473 | PPP4C    | GEO  |  |
| 6474 | PPP4R1L  | GEO  |  |
| 6475 | PPP4R4   | GEO  |  |
| 6476 | PPP5C    | GEO  |  |
| 6477 | PPP6R3   | GEO  |  |
| 6478 | PPRC1    | GEO  |  |
| 6479 | PPTC7    | GEO  |  |
| 6480 | PPY      | GEO  |  |
| 6481 | PQLC1    | GEO  |  |
| 6482 | PRAC     | GEO  |  |
| 6483 | PRAP1    | GEO  |  |
| 6484 | PRB4     | GEO  |  |
| 6485 | PRDM1    | Both |  |
| 6486 | PRDM11   | GEO  |  |
| 6487 | PRDM16   | GEO  |  |
| 6488 | PRDM2    | GAD  |  |
| 6489 | PRDM8    | GEO  |  |
| 6490 | PRDX4    | GEO  |  |
| 6491 | PRELP    | GEO  |  |
| 6492 | PREPL    | GEO  |  |
| 6493 | PREX1    | GEO  |  |
| 6494 | PREX2    | GEO  |  |
| 6495 | PRF1     | GEO  |  |
| 6496 | PRH2     | GEO  |  |
| 6497 | PRIC285  | GEO  |  |
| 6498 | PRICKLE4 | GEO  |  |



|      |           |      |  |
|------|-----------|------|--|
| 6499 | PRIMA1    | GEO  |  |
| 6500 | PRKAA1    | GAD  |  |
| 6501 | PRKAA2    | GEO  |  |
| 6502 | PRKAB1    | GEO  |  |
| 6503 | PRKAG2    | GAD  |  |
| 6504 | PRKAR1A   | GEO  |  |
| 6505 | PRKAR2A   | GEO  |  |
| 6506 | PRKCA     | GEO  |  |
| 6507 | PRKCDBP   | GEO  |  |
| 6508 | PRKCI     | GEO  |  |
| 6509 | PRKD2     | GEO  |  |
| 6510 | PRKD3     | GEO  |  |
| 6511 | PRKDC     | GEO  |  |
| 6512 | PRKG2     | GEO  |  |
| 6513 | PRKX      | GEO  |  |
| 6514 | PRLR      | GEO  |  |
| 6515 | PRMT3     | GEO  |  |
| 6516 | PRNP      | Both |  |
| 6517 | PROC      | GEO  |  |
| 6518 | PROCR     | GEO  |  |
| 6519 | PRODH     | GEO  |  |
| 6520 | PROK2     | GEO  |  |
| 6521 | PROM1     | GEO  |  |
| 6522 | PROM2     | GEO  |  |
| 6523 | PRORS1P   | GEO  |  |
| 6524 | PROS1     | GEO  |  |
| 6525 | ProSAPiP1 | GEO  |  |
| 6526 | PROSC     | GEO  |  |
| 6527 | PRPF6     | GEO  |  |
| 6528 | PRPS2     | GEO  |  |
| 6529 | PRR11     | GEO  |  |
| 6530 | PRR15     | GEO  |  |
| 6531 | PRR16     | GEO  |  |
| 6532 | PRR5      | GEO  |  |
| 6533 | PRR7      | GEO  |  |
| 6534 | PRRC1     | GEO  |  |
| 6535 | PRRG3     | GEO  |  |
| 6536 | PRRG4     | GEO  |  |
| 6537 | PRRT1     | GEO  |  |
| 6538 | PRRT2     | GEO  |  |
| 6539 | PRRT3     | GEO  |  |
| 6540 | PRRX1     | GEO  |  |
| 6541 | PRSS1     | GEO  |  |
| 6542 | PRSS12    | GEO  |  |
| 6543 | PRSS2     | GEO  |  |
| 6544 | PRSS36    | GEO  |  |
| 6545 | PRSS37    | GEO  |  |
| 6546 | PRSS54    | GEO  |  |
| 6547 | PRSS8     | GEO  |  |
| 6548 | PRUNE2    | GEO  |  |

|      |          |      |  |
|------|----------|------|--|
| 6549 | PSAP     | GEO  |  |
| 6550 | PSD2     | GEO  |  |
| 6551 | PSD3     | GEO  |  |
| 6552 | PSD4     | GEO  |  |
| 6553 | PSG2     | GEO  |  |
| 6554 | PSG4     | GEO  |  |
| 6555 | PSG9     | GEO  |  |
| 6556 | PSKH2    | GEO  |  |
| 6557 | PSMA1    | GEO  |  |
| 6558 | PSMA7    | GEO  |  |
| 6559 | PSMB1    | GEO  |  |
| 6560 | PSMB3    | GEO  |  |
| 6561 | PSMB4    | GEO  |  |
| 6562 | PSMB6    | GEO  |  |
| 6563 | PSMB7    | GEO  |  |
| 6564 | PSMB8    | GEO  |  |
| 6565 | PSMB9    | Both |  |
| 6566 | PSMC4    | GEO  |  |
| 6567 | PSMD12   | GEO  |  |
| 6568 | PSMD13   | GEO  |  |
| 6569 | PSMD3    | GEO  |  |
| 6570 | PSMD4    | GEO  |  |
| 6571 | PSMD5    | GEO  |  |
| 6572 | PSMD8    | GEO  |  |
| 6573 | PSME4    | GEO  |  |
| 6574 | PSMG1    | Both |  |
| 6575 | PSMG4    | GEO  |  |
| 6576 | PSORS1C1 | GAD  |  |
| 6577 | PSPH     | GEO  |  |
| 6578 | PSRC1    | GAD  |  |
| 6579 | PTAR1    | GEO  |  |
| 6580 | PTBP1    | GEO  |  |
| 6581 | PTCD1    | GEO  |  |
| 6582 | PTCH     | GAD  |  |
| 6583 | PTCHD1   | GEO  |  |
| 6584 | PTD012   | GEO  |  |
| 6585 | PTEN     | Both |  |
| 6586 | PTGER4   | Both |  |
| 6587 | PTGFR    | GEO  |  |
| 6588 | PTGR1    | GEO  |  |
| 6589 | PTGS1    | Both |  |
| 6590 | PTGS2    | Both |  |
| 6591 | PTK2     | GEO  |  |
| 6592 | PTK2B    | GEO  |  |
| 6593 | PTK6     | GEO  |  |
| 6594 | PTK7     | GEO  |  |
| 6595 | PTMA     | GEO  |  |
| 6596 | PTMS     | GEO  |  |
| 6597 | PTN      | GEO  |  |
| 6598 | PTOV1    | GEO  |  |

|      |           |      |  |
|------|-----------|------|--|
| 6599 | PTPLAD1   | GEO  |  |
| 6600 | PTPLAD2   | GEO  |  |
| 6601 | PTPN11    | Both |  |
| 6602 | PTPN13    | Both |  |
| 6603 | PTPN18    | GEO  |  |
| 6604 | PTPN2     | GAD  |  |
| 6605 | PTPN21    | Both |  |
| 6606 | PTPN22    | Both |  |
| 6607 | PTPN5     | GAD  |  |
| 6608 | PTPRC     | Both |  |
| 6609 | PTPRE     | GEO  |  |
| 6610 | PTPRJ     | GAD  |  |
| 6611 | PTPRK     | GEO  |  |
| 6612 | PTPRM     | GEO  |  |
| 6613 | PTPRN2    | GEO  |  |
| 6614 | PTPRO     | GEO  |  |
| 6615 | PTPRS     | Both |  |
| 6616 | PTPRT     | GAD  |  |
| 6617 | PTPRU     | GEO  |  |
| 6618 | PTPRZ1    | GEO  |  |
| 6619 | PTS       | GEO  |  |
| 6620 | PTTG1     | GEO  |  |
| 6621 | PTTG1IP   | GEO  |  |
| 6622 | PTX3      | GEO  |  |
| 6623 | PURA      | GEO  |  |
| 6624 | PUS10     | GAD  |  |
| 6625 | PVRL1     | GEO  |  |
| 6626 | PVRL2     | GEO  |  |
| 6627 | PVRL3     | GEO  |  |
| 6628 | PVRL4     | GEO  |  |
| 6629 | PWP1      | GEO  |  |
| 6630 | PWWP2B    | GEO  |  |
| 6631 | PXDN      | GEO  |  |
| 6632 | PXMP2     | GEO  |  |
| 6633 | PXMP4     | GEO  |  |
| 6634 | PYCR1     | GEO  |  |
| 6635 | PYCR2     | GEO  |  |
| 6636 | PYGB      | GEO  |  |
| 6637 | PYGM      | GEO  |  |
| 6638 | PYGO1     | GAD  |  |
| 6639 | Q8NBX4    | GEO  |  |
| 6640 | QKI       | GEO  |  |
| 6641 | QPCTL     | GEO  |  |
| 6642 | QRICH2    | GEO  |  |
| 6643 | QSER1     | GEO  |  |
| 6644 | QTRT1     | GEO  |  |
| 6645 | RAB11FIP2 | GEO  |  |
| 6646 | RAB11FIP3 | GEO  |  |
| 6647 | RAB12     | GEO  |  |
| 6648 | RAB14     | GEO  |  |

|      |          |      |  |
|------|----------|------|--|
| 6649 | RAB15    | GEO  |  |
| 6650 | RAB18    | GEO  |  |
| 6651 | RAB22A   | GEO  |  |
| 6652 | RAB24    | GEO  |  |
| 6653 | RAB26    | GEO  |  |
| 6654 | RAB27A   | GEO  |  |
| 6655 | RAB28    | GEO  |  |
| 6656 | RAB31    | GEO  |  |
| 6657 | RAB36    | GEO  |  |
| 6658 | RAB38    | GEO  |  |
| 6659 | RAB39B   | GEO  |  |
| 6660 | RAB3B    | GEO  |  |
| 6661 | RAB3D    | GEO  |  |
| 6662 | RAB3GAP1 | GEO  |  |
| 6663 | RAB3IL1  | GEO  |  |
| 6664 | RAB40B   | GEO  |  |
| 6665 | RAB6B    | GEO  |  |
| 6666 | RAB6IP1  | GEO  |  |
| 6667 | RAB7B    | GEO  |  |
| 6668 | RAB8A    | GEO  |  |
| 6669 | RAB9A    | GEO  |  |
| 6670 | RAB9B    | GEO  |  |
| 6671 | RABEP1   | GEO  |  |
| 6672 | RABGAP1L | GEO  |  |
| 6673 | RABGGTB  | GEO  |  |
| 6674 | RABL4    | GEO  |  |
| 6675 | RABL5    | GEO  |  |
| 6676 | RAC2     | GEO  |  |
| 6677 | RAC3     | GEO  |  |
| 6678 | RACGAP1  | GEO  |  |
| 6679 | RAD17    | GEO  |  |
| 6680 | RAD18    | GAD  |  |
| 6681 | RAD21    | GEO  |  |
| 6682 | RAD23A   | GEO  |  |
| 6683 | RAD23B   | Both |  |
| 6684 | RAD51    | GAD  |  |
| 6685 | RAD51C   | GEO  |  |
| 6686 | RAD52    | GAD  |  |
| 6687 | RAD54B   | Both |  |
| 6688 | RAD9A    | GAD  |  |
| 6689 | RAET1L   | GEO  |  |
| 6690 | RAI1     | GEO  |  |
| 6691 | RAI14    | GEO  |  |
| 6692 | RAI4     | GAD  |  |
| 6693 | RALA     | GEO  |  |
| 6694 | RALGAPA1 | GEO  |  |
| 6695 | RALGAPA2 | GEO  |  |
| 6696 | RALGDS   | GEO  |  |
| 6697 | RALGPS2  | GEO  |  |
| 6698 | RANBP17  | GEO  |  |

|      |          |      |  |
|------|----------|------|--|
| 6699 | RANBP5   | GEO  |  |
| 6700 | RAP1GAP  | GEO  |  |
| 6701 | RAP2A    | GEO  |  |
| 6702 | RAP2B    | GEO  |  |
| 6703 | RAPGEF2  | GEO  |  |
| 6704 | RAPGEF4  | GEO  |  |
| 6705 | RAPGEF5  | GEO  |  |
| 6706 | RAPGEFL1 | GEO  |  |
| 6707 | RARA     | GEO  |  |
| 6708 | RARG     | GEO  |  |
| 6709 | RARRES3  | GEO  |  |
| 6710 | RAS      | GAD  |  |
| 6711 | RASA4    | GEO  |  |
| 6712 | RASD1    | GEO  |  |
| 6713 | RASGEF1A | GEO  |  |
| 6714 | RASGRF2  | GEO  |  |
| 6715 | RASGRP1  | GEO  |  |
| 6716 | RASL10A  | GEO  |  |
| 6717 | RASL11B  | GEO  |  |
| 6718 | RASL12   | GEO  |  |
| 6719 | RASSF1   | GAD  |  |
| 6720 | RASSF10  | GEO  |  |
| 6721 | RASSF2   | GEO  |  |
| 6722 | RASSF5   | GEO  |  |
| 6723 | RASSF7   | GEO  |  |
| 6724 | RASSF8   | GEO  |  |
| 6725 | RAX2     | GEO  |  |
| 6726 | RB1      | Both |  |
| 6727 | RBBP4    | GEO  |  |
| 6728 | RBBP5    | GEO  |  |
| 6729 | RBBP6    | GEO  |  |
| 6730 | RBCK1    | GEO  |  |
| 6731 | RBFOX2   | GEO  |  |
| 6732 | RBKS     | GEO  |  |
| 6733 | RBM15    | GEO  |  |
| 6734 | RBM20    | GEO  |  |
| 6735 | RBM22    | GEO  |  |
| 6736 | RBM25    | GEO  |  |
| 6737 | RBM26    | GEO  |  |
| 6738 | RBM28    | GEO  |  |
| 6739 | RBM33    | GEO  |  |
| 6740 | RBM39    | GEO  |  |
| 6741 | RBM4     | GEO  |  |
| 6742 | RBM47    | GEO  |  |
| 6743 | RBM5     | GEO  |  |
| 6744 | RBMS1    | GEO  |  |
| 6745 | RBMY1A1  | GEO  |  |
| 6746 | RBP1     | GEO  |  |
| 6747 | RBP2     | GEO  |  |
| 6748 | RBP4     | GEO  |  |

|      |        |      |  |
|------|--------|------|--|
| 6749 | RBP5   | GEO  |  |
| 6750 | RBP7   | GEO  |  |
| 6751 | RBPJ   | GEO  |  |
| 6752 | RBPMS  | GEO  |  |
| 6753 | RBPMS2 | GEO  |  |
| 6754 | RC3H1  | GEO  |  |
| 6755 | RCBTB1 | GEO  |  |
| 6756 | RCBTB2 | GEO  |  |
| 6757 | RCHY1  | GEO  |  |
| 6758 | RDBP   | GEO  |  |
| 6759 | RDH10  | GEO  |  |
| 6760 | RDH13  | GEO  |  |
| 6761 | RDM1   | GEO  |  |
| 6762 | RECK   | GEO  |  |
| 6763 | RECQL4 | GEO  |  |
| 6764 | REEP1  | GEO  |  |
| 6765 | REEP5  | GEO  |  |
| 6766 | REEP6  | Both |  |
| 6767 | REG1A  | GEO  |  |
| 6768 | REG1B  | GEO  |  |
| 6769 | REG3A  | GEO  |  |
| 6770 | REG4   | GEO  |  |
| 6771 | REL    | GAD  |  |
| 6772 | RELL2  | GEO  |  |
| 6773 | RELN   | GEO  |  |
| 6774 | REP15  | GEO  |  |
| 6775 | REPIN1 | GEO  |  |
| 6776 | REPS1  | GEO  |  |
| 6777 | RER1   | GEO  |  |
| 6778 | RERGL  | GEO  |  |
| 6779 | RERGL  | GEO  |  |
| 6780 | RETN   | GAD  |  |
| 6781 | RETNLB | GEO  |  |
| 6782 | REV3L  | GEO  |  |
| 6783 | REXO1  | GEO  |  |
| 6784 | RFC1   | Both |  |
| 6785 | RFC5   | GEO  |  |
| 6786 | RFESD  | GEO  |  |
| 6787 | RFK    | GEO  |  |
| 6788 | RFNG   | GEO  |  |
| 6789 | RFT1   | GEO  |  |
| 6790 | RFTN1  | GEO  |  |
| 6791 | RFX4   | GEO  |  |
| 6792 | RFX5   | GEO  |  |
| 6793 | RFX6   | GEO  |  |
| 6794 | RGAG4  | GEO  |  |
| 6795 | RGPD1  | GEO  |  |
| 6796 | RGPD4  | GEO  |  |
| 6797 | RGPD5  | GEO  |  |
| 6798 | RGS1   | GEO  |  |

|      |          |      |  |
|------|----------|------|--|
| 6799 | RGS13    | GEO  |  |
| 6800 | RGS14    | GEO  |  |
| 6801 | RGS16    | GEO  |  |
| 6802 | RGS19IP1 | GEO  |  |
| 6803 | RGS3     | GEO  |  |
| 6804 | RGS4     | GEO  |  |
| 6805 | RGS5     | GEO  |  |
| 6806 | RGSL1    | GEO  |  |
| 6807 | RHAG     | GEO  |  |
| 6808 | RHBDF2   | GEO  |  |
| 6809 | RHBDL1   | GEO  |  |
| 6810 | RHBDL2   | GEO  |  |
| 6811 | RHBG     | GEO  |  |
| 6812 | RHD      | GAD  |  |
| 6813 | RHEB     | GEO  |  |
| 6814 | RHOA     | GAD  |  |
| 6815 | RHOB     | GEO  |  |
| 6816 | RHOBTB3  | GEO  |  |
| 6817 | RHOH     | GEO  |  |
| 6818 | RHOJ     | GEO  |  |
| 6819 | RHOQ     | GEO  |  |
| 6820 | RHPN2    | Both |  |
| 6821 | RIBC1    | GEO  |  |
| 6822 | RIC8A    | GEO  |  |
| 6823 | RICH2    | GEO  |  |
| 6824 | RICTOR   | GEO  |  |
| 6825 | RILP     | GEO  |  |
| 6826 | RIMBP3   | GEO  |  |
| 6827 | RIMKLB   | GEO  |  |
| 6828 | RIMS1    | GEO  |  |
| 6829 | RIMS2    | GEO  |  |
| 6830 | RIMS3    | GEO  |  |
| 6831 | RIOK1    | GEO  |  |
| 6832 | RIOK2    | GEO  |  |
| 6833 | RIPK1    | Both |  |
| 6834 | RIPK3    | GEO  |  |
| 6835 | RIPK4    | GEO  |  |
| 6836 | RIT1     | GEO  |  |
| 6837 | RMI1     | GAD  |  |
| 6838 | RMND1    | GEO  |  |
| 6839 | RNASE1   | Both |  |
| 6840 | RNASE4   | GEO  |  |
| 6841 | RNASEH1  | GEO  |  |
| 6842 | RNASEH2A | GEO  |  |
| 6843 | RNASEH2B | GEO  |  |
| 6844 | RNASEK   | GEO  |  |
| 6845 | RNASEL   | Both |  |
| 6846 | RNASET2  | Both |  |
| 6847 | RND1     | GEO  |  |
| 6848 | RND3     | GEO  |  |

|      |              |      |  |
|------|--------------|------|--|
| 6849 | RNF10        | GEO  |  |
| 6850 | RNF112       | GEO  |  |
| 6851 | RNF123       | GAD  |  |
| 6852 | RNF125       | GEO  |  |
| 6853 | RNF128       | GEO  |  |
| 6854 | RNF13        | GEO  |  |
| 6855 | RNF135       | GEO  |  |
| 6856 | RNF141       | GEO  |  |
| 6857 | RNF144B      | GEO  |  |
| 6858 | RNF148       | GEO  |  |
| 6859 | RNF157       | GEO  |  |
| 6860 | RNF160       | GEO  |  |
| 6861 | RNF170       | GEO  |  |
| 6862 | RNF180       | GEO  |  |
| 6863 | RNF183       | GEO  |  |
| 6864 | RNF186       | Both |  |
| 6865 | RNF212       | GEO  |  |
| 6866 | RNF213       | GEO  |  |
| 6867 | RNF217       | GEO  |  |
| 6868 | RNF220       | GEO  |  |
| 6869 | RNF5         | GEO  |  |
| 6870 | RNF6         | GEO  |  |
| 6871 | RNF7         | GEO  |  |
| 6872 | RNF8         | GEO  |  |
| 6873 | RNFT1        | GEO  |  |
| 6874 | RNFT2        | GEO  |  |
| 6875 | RNGTT        | GEO  |  |
| 6876 | RNMTL1       | GEO  |  |
| 6877 | RNPEPL1      | GAD  |  |
| 6878 | RNPS1        | GEO  |  |
| 6879 | RNR1         | GAD  |  |
| 6880 | RNR2         | GAD  |  |
| 6881 | RNU12        | GEO  |  |
| 6882 | ROBO1        | GEO  |  |
| 6883 | ROBO2        | GEO  |  |
| 6884 | ROCK1        | GEO  |  |
| 6885 | ROD1         | GEO  |  |
| 6886 | ROM1         | GEO  |  |
| 6887 | ROMO1        | GEO  |  |
| 6888 | ROPN1        | GEO  |  |
| 6889 | ROR1         | GEO  |  |
| 6890 | ROR2         | GEO  |  |
| 6891 | RORA         | GEO  |  |
| 6892 | RP11-298P3.3 | GEO  |  |
| 6893 | RP4-691N24.1 | GEO  |  |
| 6894 | RP5-1022P6.2 | GEO  |  |
| 6895 | RP9P         | GEO  |  |
| 6896 | RPA4         | GEO  |  |
| 6897 | RPAIN        | GEO  |  |
| 6898 | RPF2         | GEO  |  |

|      |          |      |  |
|------|----------|------|--|
| 6899 | RPGR     | GEO  |  |
| 6900 | RPGRIP1L | GEO  |  |
| 6901 | RPH3AL   | GAD  |  |
| 6902 | RPIB9    | GEO  |  |
| 6903 | RPL10A   | GEO  |  |
| 6904 | RPL13A   | GEO  |  |
| 6905 | RPL17    | GEO  |  |
| 6906 | RPL22L1  | GEO  |  |
| 6907 | RPL23A   | GEO  |  |
| 6908 | RPL28    | GEO  |  |
| 6909 | RPL29    | GEO  |  |
| 6910 | RPL35A   | GEO  |  |
| 6911 | RPL37    | GEO  |  |
| 6912 | RPL37A   | GEO  |  |
| 6913 | RPL38    | GEO  |  |
| 6914 | RPL39    | GEO  |  |
| 6915 | RPL3L    | GEO  |  |
| 6916 | RPL4     | GEO  |  |
| 6917 | RPL5     | GEO  |  |
| 6918 | RPL8     | GEO  |  |
| 6919 | RPP14    | GEO  |  |
| 6920 | RPP25    | GEO  |  |
| 6921 | RPRD1B   | GEO  |  |
| 6922 | RPRM     | Both |  |
| 6923 | RPS10    | GEO  |  |
| 6924 | RPS11    | GEO  |  |
| 6925 | RPS15A   | GEO  |  |
| 6926 | RPS17    | GEO  |  |
| 6927 | RPS24    | GEO  |  |
| 6928 | RPS27    | GEO  |  |
| 6929 | RPS27A   | GEO  |  |
| 6930 | RPS28    | GEO  |  |
| 6931 | RPS4Y1   | GEO  |  |
| 6932 | RPS4Y2   | GEO  |  |
| 6933 | RPS6KA1  | GAD  |  |
| 6934 | RPS6KA3  | GEO  |  |
| 6935 | RPS6KA5  | GEO  |  |
| 6936 | RPS6KA6  | GEO  |  |
| 6937 | RPS6KB1  | GAD  |  |
| 6938 | RPS6KB2  | Both |  |
| 6939 | RRAD     | GEO  |  |
| 6940 | RREB1    | GEO  |  |
| 6941 | RRM2     | GEO  |  |
| 6942 | RRM2B    | GAD  |  |
| 6943 | RRN3     | GEO  |  |
| 6944 | RSAD2    | GEO  |  |
| 6945 | RSF1     | GEO  |  |
| 6946 | RSL24D1  | GEO  |  |
| 6947 | RSPH1    | GEO  |  |
| 6948 | RSPH3    | GEO  |  |

|      |         |      |  |
|------|---------|------|--|
| 6949 | RSPO2   | GEO  |  |
| 6950 | RSPO3   | GEO  |  |
| 6951 | RSRC1   | GEO  |  |
| 6952 | RSRC2   | GEO  |  |
| 6953 | RTDR1   | GEO  |  |
| 6954 | RTKN2   | GEO  |  |
| 6955 | RTN1    | GEO  |  |
| 6956 | RTP3    | GEO  |  |
| 6957 | RTTN    | GEO  |  |
| 6958 | RUFY2   | GEO  |  |
| 6959 | RUNX1   | Both |  |
| 6960 | RUSC2   | GEO  |  |
| 6961 | RWDD4   | GEO  |  |
| 6962 | RXRA    | Both |  |
| 6963 | RYBP    | GEO  |  |
| 6964 | RYR1    | GEO  |  |
| 6965 | S100A10 | GEO  |  |
| 6966 | S100A14 | GEO  |  |
| 6967 | S100A4  | GEO  |  |
| 6968 | S100A5  | GEO  |  |
| 6969 | S100A6  | GEO  |  |
| 6970 | S100A8  | GEO  |  |
| 6971 | S100A9  | GEO  |  |
| 6972 | S100B   | GEO  |  |
| 6973 | S100PBP | GEO  |  |
| 6974 | S100Z   | GAD  |  |
| 6975 | S1PR1   | GEO  |  |
| 6976 | SAA1    | GEO  |  |
| 6977 | SAA2    | GEO  |  |
| 6978 | SAA4    | GEO  |  |
| 6979 | SAFB2   | GEO  |  |
| 6980 | SAHH3   | GEO  |  |
| 6981 | SALL1   | GEO  |  |
| 6982 | SALL2   | GEO  |  |
| 6983 | SALL4   | GEO  |  |
| 6984 | SAMD12  | GEO  |  |
| 6985 | SAMD13  | GEO  |  |
| 6986 | SAMD15  | GEO  |  |
| 6987 | SAMD4A  | GEO  |  |
| 6988 | SAMD5   | GEO  |  |
| 6989 | SAMD8   | GEO  |  |
| 6990 | SAMD9   | GEO  |  |
| 6991 | SAMD9L  | GEO  |  |
| 6992 | SAMM50  | GEO  |  |
| 6993 | SAPS1   | GEO  |  |
| 6994 | SAR1A   | GEO  |  |
| 6995 | SARS2   | GEO  |  |
| 6996 | SART3   | GEO  |  |
| 6997 | SAT1    | GEO  |  |
| 6998 | SAT2    | GEO  |  |

|      |         |      |  |
|------|---------|------|--|
| 6999 | SATB2   | Both |  |
| 7000 | SBDS    | GEO  |  |
| 7001 | SBF1    | GEO  |  |
| 7002 | SBF2    | GEO  |  |
| 7003 | SBNO2   | Both |  |
| 7004 | SCAF1   | GEO  |  |
| 7005 | SCAMP1  | GEO  |  |
| 7006 | SCAMP2  | GEO  |  |
| 7007 | SCAMP5  | GEO  |  |
| 7008 | SCAND1  | GEO  |  |
| 7009 | SCAPER  | GEO  |  |
| 7010 | SCARA3  | GEO  |  |
| 7011 | SCARB2  | GEO  |  |
| 7012 | SCCPDH  | GEO  |  |
| 7013 | SCD5    | GEO  |  |
| 7014 | SCG3    | GEO  |  |
| 7015 | SCG5    | GEO  |  |
| 7016 | SCGB2A1 | GEO  |  |
| 7017 | SCHIP1  | GEO  |  |
| 7018 | SCLY    | GEO  |  |
| 7019 | SCML1   | GEO  |  |
| 7020 | SCML4   | GEO  |  |
| 7021 | SCN3A   | GEO  |  |
| 7022 | SCN3B   | GEO  |  |
| 7023 | SCN7A   | GEO  |  |
| 7024 | SCN8A   | GEO  |  |
| 7025 | SCNN1A  | GEO  |  |
| 7026 | SCRN2   | GEO  |  |
| 7027 | SCRN3   | GEO  |  |
| 7028 | SCUBE2  | GEO  |  |
| 7029 | SDC1    | GEO  |  |
| 7030 | SDC2    | GEO  |  |
| 7031 | SDC4    | GEO  |  |
| 7032 | SDF4    | GEO  |  |
| 7033 | SDK1    | GEO  |  |
| 7034 | SDR16C5 | GEO  |  |
| 7035 | SEC11A  | GEO  |  |
| 7036 | SEC13   | GEO  |  |
| 7037 | SEC14L1 | GEO  |  |
| 7038 | SEC14L4 | GEO  |  |
| 7039 | SEC16A  | GEO  |  |
| 7040 | SEC16B  | GEO  |  |
| 7041 | SEC22B  | GEO  |  |
| 7042 | SEC22C  | GEO  |  |
| 7043 | SEC23B  | GEO  |  |
| 7044 | SEC24D  | GEO  |  |
| 7045 | SEC31A  | GEO  |  |
| 7046 | SEC31B  | GEO  |  |
| 7047 | SEC61A2 | GEO  |  |
| 7048 | SEC61B  | GEO  |  |

|      |          |      |  |
|------|----------|------|--|
| 7049 | SEC62    | GEO  |  |
| 7050 | SECISBP2 | GAD  |  |
| 7051 | SECTM1   | GEO  |  |
| 7052 | SEL1L    | GEO  |  |
| 7053 | SEL1L2   | GEO  |  |
| 7054 | SEL1L3   | GEO  |  |
| 7055 | SELE     | GAD  |  |
| 7056 | SELK     | GEO  |  |
| 7057 | SELL     | Both |  |
| 7058 | SELM     | GEO  |  |
| 7059 | SELP     | GAD  |  |
| 7060 | SELPLG   | GEO  |  |
| 7061 | SELS     | GAD  |  |
| 7062 | SEMA3C   | GEO  |  |
| 7063 | SEMA3D   | GEO  |  |
| 7064 | SEMA3E   | GEO  |  |
| 7065 | SEMA4A   | GEO  |  |
| 7066 | SEMA4B   | GEO  |  |
| 7067 | SEMA4F   | GEO  |  |
| 7068 | SEMA5A   | GEO  |  |
| 7069 | SEMA7A   | GEO  |  |
| 7070 | SEMG1    | GEO  |  |
| 7071 | SENP6    | GEO  |  |
| 7072 | SEP15    | GAD  |  |
| 7073 | SEPN1    | GEO  |  |
| 7074 | SEPSECS  | GEO  |  |
| 7075 | SEPT10   | GEO  |  |
| 7076 | SEPT11   | GEO  |  |
| 7077 | SEPT2    | GEO  |  |
| 7078 | SEPT3    | GEO  |  |
| 7079 | SEPT4    | GEO  |  |
| 7080 | SEPT6    | GEO  |  |
| 7081 | SEPT7    | GEO  |  |
| 7082 | SEPT9    | GEO  |  |
| 7083 | SEPW1    | GEO  |  |
| 7084 | SEPX1    | GEO  |  |
| 7085 | SERF1A   | GEO  |  |
| 7086 | SERF2    | GEO  |  |
| 7087 | SERINC2  | GEO  |  |
| 7088 | SERINC3  | GEO  |  |
| 7089 | SERINC5  | GEO  |  |
| 7090 | SERPINA1 | Both |  |
| 7091 | SERPINA3 | GEO  |  |
| 7092 | SERPINA4 | GEO  |  |
| 7093 | SERPINA5 | GEO  |  |
| 7094 | SERPINA6 | GEO  |  |
| 7095 | SERPINB2 | GEO  |  |
| 7096 | SERPINC1 | GEO  |  |
| 7097 | SERPINE1 | Both |  |
| 7098 | SERPINE2 | GEO  |  |

|      |          |      |  |
|------|----------|------|--|
| 7099 | SERPINF1 | Both |  |
| 7100 | SERPINF2 | GEO  |  |
| 7101 | SERPING1 | GEO  |  |
| 7102 | SERPINI1 | GEO  |  |
| 7103 | SERTAD1  | GEO  |  |
| 7104 | SERTAD2  | GEO  |  |
| 7105 | SESN3    | GEO  |  |
| 7106 | SESTD1   | GEO  |  |
| 7107 | SETD2    | GEO  |  |
| 7108 | SETD4    | GEO  |  |
| 7109 | SETD5    | GEO  |  |
| 7110 | SEZ6L2   | GEO  |  |
| 7111 | SF1      | GEO  |  |
| 7112 | SF3A2    | GEO  |  |
| 7113 | SF3B1    | GEO  |  |
| 7114 | SF3B4    | GEO  |  |
| 7115 | SF3B5    | GEO  |  |
| 7116 | SFI1     | GEO  |  |
| 7117 | SFMBT2   | GEO  |  |
| 7118 | SFN      | GEO  |  |
| 7119 | SFPQ     | GEO  |  |
| 7120 | SFRP2    | Both |  |
| 7121 | SFRP4    | Both |  |
| 7122 | SFRS1    | GEO  |  |
| 7123 | SFRS15   | GEO  |  |
| 7124 | SFRS2B   | GEO  |  |
| 7125 | SFRS3    | GEO  |  |
| 7126 | SFRS4    | GEO  |  |
| 7127 | SFSWAP   | GEO  |  |
| 7128 | SFTA2    | GEO  |  |
| 7129 | SFTPB    | GEO  |  |
| 7130 | SFTPC    | GEO  |  |
| 7131 | SGCB     | GEO  |  |
| 7132 | SGCD     | GEO  |  |
| 7133 | SGK269   | GEO  |  |
| 7134 | SGK494   | GEO  |  |
| 7135 | SGPP2    | GEO  |  |
| 7136 | SGSH     | GEO  |  |
| 7137 | SGSM3    | GEO  |  |
| 7138 | SH2B2    | GEO  |  |
| 7139 | SH2B3    | GEO  |  |
| 7140 | SH2D2A   | GEO  |  |
| 7141 | SH2D3A   | GEO  |  |
| 7142 | SH2D6    | GEO  |  |
| 7143 | SH3BGR   | GEO  |  |
| 7144 | SH3BGRL2 | GEO  |  |
| 7145 | SH3BGRL3 | GEO  |  |
| 7146 | SH3BP4   | GEO  |  |
| 7147 | SH3D20   | GEO  |  |
| 7148 | SH3GL2   | GEO  |  |

|      |          |      |  |
|------|----------|------|--|
| 7149 | SH3GLB1  | GAD  |  |
| 7150 | SH3PXD2A | GEO  |  |
| 7151 | SH3RF2   | GEO  |  |
| 7152 | SH3TC1   | GEO  |  |
| 7153 | SH3YL1   | GEO  |  |
| 7154 | SHANK3   | GEO  |  |
| 7155 | SHC3     | GEO  |  |
| 7156 | SHC4     | GEO  |  |
| 7157 | SHD      | GEO  |  |
| 7158 | SHE      | GEO  |  |
| 7159 | SHH      | GEO  |  |
| 7160 | SHISA5   | GEO  |  |
| 7161 | SHMT1    | GAD  |  |
| 7162 | SHOX2    | GEO  |  |
| 7163 | SHPK     | GEO  |  |
| 7164 | SHQ1     | GEO  |  |
| 7165 | ShrmL    | GEO  |  |
| 7166 | SHROOM2  | GEO  |  |
| 7167 | SHROOM3  | GEO  |  |
| 7168 | SHROOM4  | GEO  |  |
| 7169 | SI       | GEO  |  |
| 7170 | SIAE     | GEO  |  |
| 7171 | SIDT1    | GEO  |  |
| 7172 | SIGLEC15 | GEO  |  |
| 7173 | SIGLEC7  | GEO  |  |
| 7174 | SIK1     | GEO  |  |
| 7175 | SIK3     | GEO  |  |
| 7176 | SIP1     | GEO  |  |
| 7177 | SIPA1L2  | GEO  |  |
| 7178 | SIPA1L3  | GEO  |  |
| 7179 | SIRPA    | GEO  |  |
| 7180 | SIRT5    | GEO  |  |
| 7181 | SIX1     | GEO  |  |
| 7182 | SKA3     | GEO  |  |
| 7183 | SKIL     | GEO  |  |
| 7184 | SKP1     | GEO  |  |
| 7185 | SKP2     | GEO  |  |
| 7186 | SLA2     | GEO  |  |
| 7187 | SLAMF1   | GEO  |  |
| 7188 | SLAMF7   | GEO  |  |
| 7189 | SLAMF8   | GEO  |  |
| 7190 | SLC10A1  | GEO  |  |
| 7191 | SLC10A2  | GAD  |  |
| 7192 | SLC11A1  | GAD  |  |
| 7193 | SLC12A3  | GEO  |  |
| 7194 | SLC13A2  | GEO  |  |
| 7195 | SLC13A3  | GEO  |  |
| 7196 | SLC13A5  | GEO  |  |
| 7197 | SLC14A1  | Both |  |
| 7198 | SLC15A1  | Both |  |

|      |            |      |  |
|------|------------|------|--|
| 7199 | SLC15A2    | GEO  |  |
| 7200 | SLC16A1    | GEO  |  |
| 7201 | SLC16A14   | GEO  |  |
| 7202 | SLC16A2    | GEO  |  |
| 7203 | SLC16A4    | GEO  |  |
| 7204 | SLC16A5    | GEO  |  |
| 7205 | SLC16A6    | GEO  |  |
| 7206 | SLC16A7    | GEO  |  |
| 7207 | SLC17A4    | GEO  |  |
| 7208 | SLC17A9    | GEO  |  |
| 7209 | SLC18A1    | GEO  |  |
| 7210 | SLC19A1    | Both |  |
| 7211 | SLC1A3     | GEO  |  |
| 7212 | SLC1A5     | GEO  |  |
| 7213 | SLC22A1    | GEO  |  |
| 7214 | SLC22A11   | GEO  |  |
| 7215 | SLC22A15   | GEO  |  |
| 7216 | SLC22A18AS | GEO  |  |
| 7217 | SLC22A2    | GEO  |  |
| 7218 | SLC22A23   | Both |  |
| 7219 | SLC22A5    | Both |  |
| 7220 | SLC22A6    | GAD  |  |
| 7221 | SLC23A1    | GAD  |  |
| 7222 | SLC23A2    | GAD  |  |
| 7223 | SLC25A1    | GEO  |  |
| 7224 | SLC25A13   | GEO  |  |
| 7225 | SLC25A14   | GEO  |  |
| 7226 | SLC25A20   | GEO  |  |
| 7227 | SLC25A21   | GEO  |  |
| 7228 | SLC25A22   | GEO  |  |
| 7229 | SLC25A25   | GEO  |  |
| 7230 | SLC25A30   | GEO  |  |
| 7231 | SLC25A32   | GEO  |  |
| 7232 | SLC25A4    | GEO  |  |
| 7233 | SLC25A5    | GEO  |  |
| 7234 | SLC25A6    | GEO  |  |
| 7235 | SLC26A4    | GEO  |  |
| 7236 | SLC28A3    | GEO  |  |
| 7237 | SLC29A1    | GEO  |  |
| 7238 | SLC2A14    | GEO  |  |
| 7239 | SLC2A3     | GEO  |  |
| 7240 | SLC2A4RG   | GEO  |  |
| 7241 | SLC30A1    | GEO  |  |
| 7242 | SLC30A3    | GEO  |  |
| 7243 | SLC31A2    | GEO  |  |
| 7244 | SLC34A2    | GEO  |  |
| 7245 | SLC35A1    | GEO  |  |
| 7246 | SLC35A2    | GEO  |  |
| 7247 | SLC35D1    | GEO  |  |
| 7248 | SLC35D3    | GEO  |  |

|      |          |     |  |
|------|----------|-----|--|
| 7249 | SLC35E1  | GEO |  |
| 7250 | SLC36A1  | GEO |  |
| 7251 | SLC36A4  | GEO |  |
| 7252 | SLC37A2  | GEO |  |
| 7253 | SLC37A4  | GEO |  |
| 7254 | SLC38A10 | GEO |  |
| 7255 | SLC38A2  | GEO |  |
| 7256 | SLC38A3  | GEO |  |
| 7257 | SLC38A4  | GEO |  |
| 7258 | SLC39A13 | GEO |  |
| 7259 | SLC39A3  | GEO |  |
| 7260 | SLC39A4  | GEO |  |
| 7261 | SLC39A5  | GEO |  |
| 7262 | SLC39A8  | GEO |  |
| 7263 | SLC3A1   | GEO |  |
| 7264 | SLC41A2  | GEO |  |
| 7265 | SLC44A2  | GEO |  |
| 7266 | SLC44A3  | GEO |  |
| 7267 | SLC44A4  | GEO |  |
| 7268 | SLC45A4  | GEO |  |
| 7269 | SLC46A1  | GEO |  |
| 7270 | SLC47A1  | GEO |  |
| 7271 | SLC48A1  | GEO |  |
| 7272 | SLC4A3   | GEO |  |
| 7273 | SLC5A1   | GEO |  |
| 7274 | SLC5A6   | GEO |  |
| 7275 | SLC5A9   | GEO |  |
| 7276 | SLC6A10P | GEO |  |
| 7277 | SLC6A13  | GEO |  |
| 7278 | SLC6A14  | GEO |  |
| 7279 | SLC6A3   | GEO |  |
| 7280 | SLC6A4   | GAD |  |
| 7281 | SLC6A8   | GEO |  |
| 7282 | SLC7A1   | GEO |  |
| 7283 | SLC7A11  | GEO |  |
| 7284 | SLC7A6   | GEO |  |
| 7285 | SLC7A7   | GEO |  |
| 7286 | SLC9A3R1 | GEO |  |
| 7287 | SLC9A3R2 | GEO |  |
| 7288 | SLC9A8   | GEO |  |
| 7289 | SLCO1B1  | GAD |  |
| 7290 | SLCO1B3  | GEO |  |
| 7291 | SLCO2A1  | GEO |  |
| 7292 | SLCO2B1  | GEO |  |
| 7293 | SLCO5A1  | GEO |  |
| 7294 | SLFN5    | GEO |  |
| 7295 | SLIT3    | GEO |  |
| 7296 | SLK      | GEO |  |
| 7297 | SLMO2    | GEO |  |
| 7298 | SLPI     | GEO |  |



|      |          |      |  |
|------|----------|------|--|
| 7299 | SMAD1    | GEO  |  |
| 7300 | SMAD3    | Both |  |
| 7301 | SMAD5    | GEO  |  |
| 7302 | SMAD7    | Both |  |
| 7303 | SMAGP    | GEO  |  |
| 7304 | SMAP1    | GEO  |  |
| 7305 | SMARCA2  | GEO  |  |
| 7306 | SMARCA4  | GEO  |  |
| 7307 | SMARCA5  | GEO  |  |
| 7308 | SMARCD3  | GEO  |  |
| 7309 | SMARCE1  | GEO  |  |
| 7310 | SMC5     | GEO  |  |
| 7311 | SMCHD1   | GEO  |  |
| 7312 | SMCR7L   | GEO  |  |
| 7313 | SMCY     | GEO  |  |
| 7314 | SMEK2    | GEO  |  |
| 7315 | SMG7     | GEO  |  |
| 7316 | SMN1     | GEO  |  |
| 7317 | SMNDC1   | GEO  |  |
| 7318 | SMO      | GEO  |  |
| 7319 | SMOX     | GEO  |  |
| 7320 | SMPD1    | GEO  |  |
| 7321 | SMPD3    | GEO  |  |
| 7322 | SMU1     | GEO  |  |
| 7323 | SMURF1   | GAD  |  |
| 7324 | SMURF2   | GEO  |  |
| 7325 | SMYD1    | GEO  |  |
| 7326 | SMYD3    | GAD  |  |
| 7327 | SNAP23   | GEO  |  |
| 7328 | SNAPC3   | GEO  |  |
| 7329 | SND1     | GEO  |  |
| 7330 | SNHG1    | GEO  |  |
| 7331 | SNHG7    | GEO  |  |
| 7332 | SNIP     | GEO  |  |
| 7333 | SNN      | GEO  |  |
| 7334 | SNORA71A | GEO  |  |
| 7335 | SNORD104 | GEO  |  |
| 7336 | SNRPA1   | GEO  |  |
| 7337 | SNRPB2   | GEO  |  |
| 7338 | SNRPE    | GEO  |  |
| 7339 | SNRPF    | GEO  |  |
| 7340 | SNRPN    | GEO  |  |
| 7341 | SNTB2    | GEO  |  |
| 7342 | SNX10    | GEO  |  |
| 7343 | SNX19    | GEO  |  |
| 7344 | SNX25    | GEO  |  |
| 7345 | SNX26    | GEO  |  |
| 7346 | SNX4     | GEO  |  |
| 7347 | SNX5     | GEO  |  |
| 7348 | SNX8     | GEO  |  |

|      |         |      |  |
|------|---------|------|--|
| 7349 | SOAT1   | GEO  |  |
| 7350 | SOAT2   | GEO  |  |
| 7351 | SOCS2   | GEO  |  |
| 7352 | SOCS3   | GEO  |  |
| 7353 | SOCS5   | GEO  |  |
| 7354 | SOD2    | Both |  |
| 7355 | SOD3    | GEO  |  |
| 7356 | SOHLH1  | GEO  |  |
| 7357 | SOHLH2  | GEO  |  |
| 7358 | SORBS1  | GEO  |  |
| 7359 | SORBS2  | GEO  |  |
| 7360 | SORBS3  | GEO  |  |
| 7361 | SORCS1  | GEO  |  |
| 7362 | SORCS2  | GEO  |  |
| 7363 | SOS2    | GEO  |  |
| 7364 | SOSTDC1 | GEO  |  |
| 7365 | SOX1    | GEO  |  |
| 7366 | SOX10   | GEO  |  |
| 7367 | SOX15   | GEO  |  |
| 7368 | SOX18   | GEO  |  |
| 7369 | SOX30   | GEO  |  |
| 7370 | SOX8    | GEO  |  |
| 7371 | SP140   | GEO  |  |
| 7372 | SP140L  | GEO  |  |
| 7373 | SP8     | GEO  |  |
| 7374 | SPACA1  | GEO  |  |
| 7375 | SPAG17  | GAD  |  |
| 7376 | SPAG4   | GEO  |  |
| 7377 | SPAG9   | GEO  |  |
| 7378 | SPATA13 | GEO  |  |
| 7379 | SPATA17 | GEO  |  |
| 7380 | SPATA18 | GEO  |  |
| 7381 | SPATA2  | GEO  |  |
| 7382 | SPATA5  | GEO  |  |
| 7383 | SPATA6  | GEO  |  |
| 7384 | SPATA7  | GEO  |  |
| 7385 | SPCS1   | GEO  |  |
| 7386 | SPCS3   | GEO  |  |
| 7387 | SPDEF   | GEO  |  |
| 7388 | SPECC1  | GEO  |  |
| 7389 | SPEG    | GEO  |  |
| 7390 | SPESP1  | GEO  |  |
| 7391 | SPG11   | GEO  |  |
| 7392 | SPG20   | GEO  |  |
| 7393 | SPI1    | GEO  |  |
| 7394 | SPIN2A  | GEO  |  |
| 7395 | SPIN3   | GEO  |  |
| 7396 | SPINK1  | GEO  |  |
| 7397 | SPINK2  | GEO  |  |
| 7398 | SPINK5  | GEO  |  |

|      |          |      |  |
|------|----------|------|--|
| 7399 | SPINT1   | GEO  |  |
| 7400 | SPIRE2   | GEO  |  |
| 7401 | SPOCK1   | GEO  |  |
| 7402 | SPOCK2   | GEO  |  |
| 7403 | SPON1    | GEO  |  |
| 7404 | SPON2    | GEO  |  |
| 7405 | SPOPL    | GEO  |  |
| 7406 | SPPL2B   | GEO  |  |
| 7407 | SPRR1B   | GEO  |  |
| 7408 | SPRR3    | GEO  |  |
| 7409 | SPSB1    | GEO  |  |
| 7410 | SPSB4    | GEO  |  |
| 7411 | SPTA1    | GEO  |  |
| 7412 | SPTB     | GEO  |  |
| 7413 | SPTBN1   | GEO  |  |
| 7414 | SPTLC1   | GEO  |  |
| 7415 | SPTLC3   | GEO  |  |
| 7416 | SPTY2D1  | GEO  |  |
| 7417 | SQLE     | GEO  |  |
| 7418 | SQSTM1   | GEO  |  |
| 7419 | SR140    | GEO  |  |
| 7420 | SRC      | GEO  |  |
| 7421 | SRCAP    | GEO  |  |
| 7422 | SRD5A1   | GEO  |  |
| 7423 | SREBF1   | GEO  |  |
| 7424 | SREK1IP1 | GEO  |  |
| 7425 | SRGAP1   | GEO  |  |
| 7426 | SRGAP2P1 | GEO  |  |
| 7427 | SRGN     | GEO  |  |
| 7428 | SRMS     | GEO  |  |
| 7429 | SRP72    | GEO  |  |
| 7430 | SRPK2    | GEO  |  |
| 7431 | SRPK3    | GEO  |  |
| 7432 | SRPRB    | GEO  |  |
| 7433 | SRRM1    | GEO  |  |
| 7434 | SRRM2    | GEO  |  |
| 7435 | SRRM3    | GEO  |  |
| 7436 | SRSF1    | GEO  |  |
| 7437 | SRSF11   | GEO  |  |
| 7438 | SRSF3    | GEO  |  |
| 7439 | SRSF4    | GEO  |  |
| 7440 | SRSF5    | GEO  |  |
| 7441 | SSBP3    | GEO  |  |
| 7442 | SSFA2    | GEO  |  |
| 7443 | SSH1     | Both |  |
| 7444 | SSH2     | GAD  |  |
| 7445 | SSH3     | GEO  |  |
| 7446 | SSR3     | GEO  |  |
| 7447 | SSTR1    | GEO  |  |
| 7448 | SSTR2    | GEO  |  |

|      |            |      |  |
|------|------------|------|--|
| 7449 | SSX1       | GEO  |  |
| 7450 | SSX2IP     | GEO  |  |
| 7451 | ST13       | GEO  |  |
| 7452 | ST14       | GEO  |  |
| 7453 | ST3GAL2    | GEO  |  |
| 7454 | ST3GAL4    | GEO  |  |
| 7455 | ST3GAL6    | GEO  |  |
| 7456 | ST6GAL1    | GEO  |  |
| 7457 | ST6GALNAC6 | GEO  |  |
| 7458 | ST7        | GEO  |  |
| 7459 | ST7L       | GEO  |  |
| 7460 | ST8SIA4    | GEO  |  |
| 7461 | STAG3      | GEO  |  |
| 7462 | STAM2      | GEO  |  |
| 7463 | STARD10    | GEO  |  |
| 7464 | STARD4     | GEO  |  |
| 7465 | STARD7     | GEO  |  |
| 7466 | STARD9     | GEO  |  |
| 7467 | STAT1      | GEO  |  |
| 7468 | STAT3      | GAD  |  |
| 7469 | STAT4      | Both |  |
| 7470 | STAT5A     | GEO  |  |
| 7471 | STAT6      | Both |  |
| 7472 | STEAP1     | GEO  |  |
| 7473 | STIM2      | GEO  |  |
| 7474 | STIP1      | GEO  |  |
| 7475 | STK17A     | GEO  |  |
| 7476 | STK17B     | GEO  |  |
| 7477 | STK3       | GEO  |  |
| 7478 | STK31      | GEO  |  |
| 7479 | STK33      | GEO  |  |
| 7480 | STK39      | GEO  |  |
| 7481 | STOM       | GEO  |  |
| 7482 | STOML2     | GEO  |  |
| 7483 | STON1      | GEO  |  |
| 7484 | STRADA     | GEO  |  |
| 7485 | STRN3      | GEO  |  |
| 7486 | STUB1      | GEO  |  |
| 7487 | STX6       | GEO  |  |
| 7488 | STX7       | GEO  |  |
| 7489 | STX8       | Both |  |
| 7490 | STXBP3     | GEO  |  |
| 7491 | STXBP5L    | GEO  |  |
| 7492 | SUB1       | GEO  |  |
| 7493 | SUGT1      | GEO  |  |
| 7494 | SULT1A3    | GEO  |  |
| 7495 | SULT1A4    | GEO  |  |
| 7496 | SULT1B1    | GEO  |  |
| 7497 | SULT1C2    | GEO  |  |
| 7498 | SULT2A1    | GEO  |  |

|      |          |      |  |
|------|----------|------|--|
| 7499 | SUMO3    | GEO  |  |
| 7500 | SUPT16H  | GEO  |  |
| 7501 | SUPT4H1  | GEO  |  |
| 7502 | SURF1    | GAD  |  |
| 7503 | SURF4    | GEO  |  |
| 7504 | SUSD4    | GEO  |  |
| 7505 | SUV420H1 | GEO  |  |
| 7506 | SUZ12    | GEO  |  |
| 7507 | SV2B     | GEO  |  |
| 7508 | SVEP1    | GEO  |  |
| 7509 | SVOP     | GEO  |  |
| 7510 | SVOPL    | GEO  |  |
| 7511 | SYCE1L   | GEO  |  |
| 7512 | SYCP3    | GEO  |  |
| 7513 | SYDE1    | GEO  |  |
| 7514 | SYDE2    | GEO  |  |
| 7515 | SYMPK    | GAD  |  |
| 7516 | SYNC1    | GEO  |  |
| 7517 | SYNE1    | GEO  |  |
| 7518 | SYNJ2    | GEO  |  |
| 7519 | SYNJ2BP  | GEO  |  |
| 7520 | SYNM     | GEO  |  |
| 7521 | SYNPO2   | GEO  |  |
| 7522 | SYPL1    | GEO  |  |
| 7523 | SYT1     | GEO  |  |
| 7524 | SYT7     | GEO  |  |
| 7525 | SYTL1    | GEO  |  |
| 7526 | SYTL3    | GEO  |  |
| 7527 | SYTL4    | GEO  |  |
| 7528 | SYTL5    | GEO  |  |
| 7529 | T1A-2    | GEO  |  |
| 7530 | TAB2     | GEO  |  |
| 7531 | TACC1    | GEO  |  |
| 7532 | TACC2    | GEO  |  |
| 7533 | TACR2    | GEO  |  |
| 7534 | TAF13    | GEO  |  |
| 7535 | TAF15    | GEO  |  |
| 7536 | TAF1D    | GEO  |  |
| 7537 | TAF8     | GEO  |  |
| 7538 | TAF9B    | GEO  |  |
| 7539 | TAGAP    | Both |  |
| 7540 | TAGLN    | GEO  |  |
| 7541 | TANC2    | GEO  |  |
| 7542 | TANK     | GEO  |  |
| 7543 | TAOK3    | GEO  |  |
| 7544 | TAP1     | GEO  |  |
| 7545 | TAP2     | GEO  |  |
| 7546 | TARBP1   | GEO  |  |
| 7547 | TARDBP   | GEO  |  |
| 7548 | TARP     | GEO  |  |

|      |           |      |  |
|------|-----------|------|--|
| 7549 | TARSL2    | GEO  |  |
| 7550 | TAS2R14   | GAD  |  |
| 7551 | TAS2R16   | GEO  |  |
| 7552 | TATDN1    | GEO  |  |
| 7553 | TAZ       | GEO  |  |
| 7554 | TBC1D1    | GEO  |  |
| 7555 | TBC1D16   | GEO  |  |
| 7556 | TBC1D19   | GEO  |  |
| 7557 | TBC1D22A  | GEO  |  |
| 7558 | TBC1D8    | GEO  |  |
| 7559 | TBC1D9    | GEO  |  |
| 7560 | TBCB      | GEO  |  |
| 7561 | TBCD      | GEO  |  |
| 7562 | TBCEL     | GEO  |  |
| 7563 | TBL1X     | GEO  |  |
| 7564 | TBPL1     | GEO  |  |
| 7565 | TBR1      | GAD  |  |
| 7566 | TBRG1     | GEO  |  |
| 7567 | TBRG4     | GEO  |  |
| 7568 | TBX2      | GEO  |  |
| 7569 | TBX3      | GEO  |  |
| 7570 | TBX6      | GEO  |  |
| 7571 | TBXAS1    | GEO  |  |
| 7572 | tcag7.907 | GEO  |  |
| 7573 | TCEAL2    | GEO  |  |
| 7574 | TCEAL3    | GEO  |  |
| 7575 | TCEAL4    | GEO  |  |
| 7576 | TCEB1     | GEO  |  |
| 7577 | TCEB2     | GEO  |  |
| 7578 | TCERG1    | GEO  |  |
| 7579 | TCF19     | GEO  |  |
| 7580 | TCF25     | GEO  |  |
| 7581 | TCF3      | GEO  |  |
| 7582 | TCF7L1    | GEO  |  |
| 7583 | TCF7L2    | GAD  |  |
| 7584 | TCFL5     | GEO  |  |
| 7585 | TCN2      | GAD  |  |
| 7586 | TCP11L1   | GEO  |  |
| 7587 | TCP11L2   | GEO  |  |
| 7588 | TCTE3     | GEO  |  |
| 7589 | TDE2L     | GEO  |  |
| 7590 | TDG       | GEO  |  |
| 7591 | TDGF1     | GEO  |  |
| 7592 | TDP1      | Both |  |
| 7593 | TDP2      | GEO  |  |
| 7594 | TDRD10    | GEO  |  |
| 7595 | TDRD7     | GEO  |  |
| 7596 | TDRD9     | GAD  |  |
| 7597 | TDRKH     | GEO  |  |
| 7598 | TEAD2     | GEO  |  |

|      |         |      |  |
|------|---------|------|--|
| 7599 | TECTA   | GEO  |  |
| 7600 | TEF     | GEO  |  |
| 7601 | TEK     | GEO  |  |
| 7602 | TEKT4   | GEO  |  |
| 7603 | TEP1    | GEO  |  |
| 7604 | TET1    | GEO  |  |
| 7605 | TET2    | GEO  |  |
| 7606 | TEX11   | GEO  |  |
| 7607 | TEX19   | GEO  |  |
| 7608 | TEX261  | GEO  |  |
| 7609 | TEX9    | GEO  |  |
| 7610 | TF      | Both |  |
| 7611 | TFAM    | GEO  |  |
| 7612 | TFAP2A  | GEO  |  |
| 7613 | TFDP1   | GEO  |  |
| 7614 | TFDP2   | GEO  |  |
| 7615 | TFE3    | GEO  |  |
| 7616 | TFEB    | GEO  |  |
| 7617 | TFF1    | GEO  |  |
| 7618 | TFF2    | GEO  |  |
| 7619 | TFF3    | GEO  |  |
| 7620 | TFG     | GEO  |  |
| 7621 | TFPI    | GEO  |  |
| 7622 | TFPI2   | GEO  |  |
| 7623 | TFRC    | GAD  |  |
| 7624 | TG      | GEO  |  |
| 7625 | TGFA    | GEO  |  |
| 7626 | TGFB111 | GEO  |  |
| 7627 | TGFBR3  | GEO  |  |
| 7628 | TGFBRI  | GAD  |  |
| 7629 | TGIF    | GEO  |  |
| 7630 | TGM2    | GEO  |  |
| 7631 | TGM4    | GEO  |  |
| 7632 | TGS1    | GEO  |  |
| 7633 | TH1L    | GEO  |  |
| 7634 | THAP2   | GEO  |  |
| 7635 | THBD    | GEO  |  |
| 7636 | THBS1   | Both |  |
| 7637 | THBS4   | GEO  |  |
| 7638 | THEM5   | GEO  |  |
| 7639 | THG1L   | GEO  |  |
| 7640 | THNSL1  | GEO  |  |
| 7641 | THNSL2  | GEO  |  |
| 7642 | THOC4   | GEO  |  |
| 7643 | THRA    | GEO  |  |
| 7644 | THRAP3  | GEO  |  |
| 7645 | THRB    | GEO  |  |
| 7646 | THSD7A  | GEO  |  |
| 7647 | THUMPD1 | GEO  |  |
| 7648 | THY1    | GEO  |  |

|      |          |      |  |
|------|----------|------|--|
| 7649 | TIAL1    | GEO  |  |
| 7650 | TICAM1   | GEO  |  |
| 7651 | TIE1     | GEO  |  |
| 7652 | TIFA     | GEO  |  |
| 7653 | TIGD2    | GEO  |  |
| 7654 | TIGD7    | GEO  |  |
| 7655 | TIMELESS | GEO  |  |
| 7656 | TIMM13   | GEO  |  |
| 7657 | TIMM17B  | GEO  |  |
| 7658 | TIMM23   | GEO  |  |
| 7659 | TIMM44   | GEO  |  |
| 7660 | TIMM8B   | GEO  |  |
| 7661 | TIMP4    | GEO  |  |
| 7662 | TINAG    | GEO  |  |
| 7663 | TINAGL1  | GEO  |  |
| 7664 | TIPARP   | GEO  |  |
| 7665 | TIPRL    | GEO  |  |
| 7666 | TJP2     | GEO  |  |
| 7667 | TJP3     | GEO  |  |
| 7668 | TKTL1    | GEO  |  |
| 7669 | TLCD2    | GEO  |  |
| 7670 | TLE2     | GEO  |  |
| 7671 | TLE3     | GEO  |  |
| 7672 | TLE4     | GEO  |  |
| 7673 | TLN2     | GEO  |  |
| 7674 | TLR1     | Both |  |
| 7675 | TLR2     | GAD  |  |
| 7676 | TLR3     | GEO  |  |
| 7677 | TLR4     | Both |  |
| 7678 | TLR5     | GAD  |  |
| 7679 | TLR6     | GAD  |  |
| 7680 | TLR7     | GEO  |  |
| 7681 | TLR9     | GAD  |  |
| 7682 | TLX2     | GEO  |  |
| 7683 | TM16F    | GEO  |  |
| 7684 | TM2D3    | GEO  |  |
| 7685 | TM4SF18  | GEO  |  |
| 7686 | TM4SF19  | GEO  |  |
| 7687 | TM4SF2   | GEO  |  |
| 7688 | TM4SF20  | GEO  |  |
| 7689 | TM4SF4   | GEO  |  |
| 7690 | TM4SF9   | GEO  |  |
| 7691 | TM7SF2   | GEO  |  |
| 7692 | TM9SF2   | GEO  |  |
| 7693 | TM9SF3   | GEO  |  |
| 7694 | TMBIM1   | GEO  |  |
| 7695 | TMBIM4   | GEO  |  |
| 7696 | TMC4     | GEO  |  |
| 7697 | TMC5     | GEO  |  |
| 7698 | TMC6     | GEO  |  |

|      |              |     |  |
|------|--------------|-----|--|
| 7699 | TMCC2        | GEO |  |
| 7700 | TMCO3        | GEO |  |
| 7701 | TMCO7        | GEO |  |
| 7702 | TMED3        | GEO |  |
| 7703 | TMED6        | GEO |  |
| 7704 | TMED8        | GEO |  |
| 7705 | TMED9        | GEO |  |
| 7706 | TMEFF2       | GEO |  |
| 7707 | TMEM1        | GEO |  |
| 7708 | TMEM100      | GEO |  |
| 7709 | TMEM106A     | GEO |  |
| 7710 | TMEM109      | GEO |  |
| 7711 | TMEM111      | GEO |  |
| 7712 | TMEM132A     | GEO |  |
| 7713 | TMEM132B     | GEO |  |
| 7714 | TMEM136      | GEO |  |
| 7715 | TMEM14A      | GEO |  |
| 7716 | TMEM151B     | GEO |  |
| 7717 | TMEM159      | GEO |  |
| 7718 | TMEM160      | GEO |  |
| 7719 | TMEM161A     | GEO |  |
| 7720 | TMEM164      | GEO |  |
| 7721 | TMEM166      | GEO |  |
| 7722 | TMEM16E      | GEO |  |
| 7723 | TMEM16G      | GEO |  |
| 7724 | TMEM170A     | GEO |  |
| 7725 | TMEM170B     | GEO |  |
| 7726 | TMEM173      | GEO |  |
| 7727 | TMEM178      | GEO |  |
| 7728 | TMEM18       | GEO |  |
| 7729 | TMEM181      | GEO |  |
| 7730 | TMEM184A     | GEO |  |
| 7731 | TMEM184C     | GEO |  |
| 7732 | TMEM189-UBE2 | GEO |  |
| 7733 | TMEM191A     | GEO |  |
| 7734 | TMEM195      | GEO |  |
| 7735 | TMEM200A     | GEO |  |
| 7736 | TMEM201      | GEO |  |
| 7737 | TMEM206      | GEO |  |
| 7738 | TMEM217      | GEO |  |
| 7739 | TMEM220      | GEO |  |
| 7740 | TMEM223      | GEO |  |
| 7741 | TMEM25       | GEO |  |
| 7742 | TMEM27       | GEO |  |
| 7743 | TMEM30B      | GEO |  |
| 7744 | TMEM33       | GEO |  |
| 7745 | TMEM35       | GEO |  |
| 7746 | TMEM37       | GEO |  |
| 7747 | TMEM38B      | GEO |  |
| 7748 | TMEM45A      | GEO |  |

|      |           |      |  |
|------|-----------|------|--|
| 7749 | TMEM45B   | GEO  |  |
| 7750 | TMEM47    | GEO  |  |
| 7751 | TMEM49    | GEO  |  |
| 7752 | TMEM50A   | GEO  |  |
| 7753 | TMEM56    | GEO  |  |
| 7754 | TMEM60    | GEO  |  |
| 7755 | TMEM61    | GEO  |  |
| 7756 | TMEM62    | GEO  |  |
| 7757 | TMEM63C   | GEO  |  |
| 7758 | TMEM65    | GEO  |  |
| 7759 | TMEM66    | GEO  |  |
| 7760 | TMEM67    | GEO  |  |
| 7761 | TMEM72    | GEO  |  |
| 7762 | TMEM86B   | GEO  |  |
| 7763 | TMEM87A   | GEO  |  |
| 7764 | TMEM91    | GEO  |  |
| 7765 | TMEM92    | GEO  |  |
| 7766 | TMEM97    | GEO  |  |
| 7767 | TMEPAI    | GEO  |  |
| 7768 | TMIGD     | GEO  |  |
| 7769 | TMIGD1    | GEO  |  |
| 7770 | TMLHE     | GEO  |  |
| 7771 | TMOD1     | GEO  |  |
| 7772 | TMOD2     | GEO  |  |
| 7773 | TMOD3     | GEO  |  |
| 7774 | TMPRSS15  | GEO  |  |
| 7775 | TMPRSS4   | GEO  |  |
| 7776 | TMPRSS6   | GEO  |  |
| 7777 | TMSB10    | GEO  |  |
| 7778 | TMSB15B   | GEO  |  |
| 7779 | TMSB4X    | GEO  |  |
| 7780 | TMTC4     | GEO  |  |
| 7781 | TMX3      | GEO  |  |
| 7782 | TNC       | GEO  |  |
| 7783 | TNF       | GAD  |  |
| 7784 | TNFAIP1   | GEO  |  |
| 7785 | TNFAIP3   | Both |  |
| 7786 | TNFAIP6   | GEO  |  |
| 7787 | TNFAIP8   | GEO  |  |
| 7788 | TNFAIP8L1 | GEO  |  |
| 7789 | TNFRSF10A | Both |  |
| 7790 | TNFRSF10D | GEO  |  |
| 7791 | TNFRSF11A | GEO  |  |
| 7792 | TNFRSF13B | GEO  |  |
| 7793 | TNFRSF17  | GEO  |  |
| 7794 | TNFRSF18  | GEO  |  |
| 7795 | TNFRSF19  | GEO  |  |
| 7796 | TNFRSF1A  | GAD  |  |
| 7797 | TNFRSF1B  | Both |  |
| 7798 | TNFRSF25  | GEO  |  |

|      |          |      |  |
|------|----------|------|--|
| 7799 | TNFRSF6B | GAD  |  |
| 7800 | TNFSF12  | GEO  |  |
| 7801 | TNFSF15  | Both |  |
| 7802 | TNFSF18  | GAD  |  |
| 7803 | TNIP1    | GEO  |  |
| 7804 | TNKS2    | GEO  |  |
| 7805 | TNMD     | GEO  |  |
| 7806 | TNNC1    | GEO  |  |
| 7807 | TNNC2    | GEO  |  |
| 7808 | TNNI2    | GEO  |  |
| 7809 | TNNI3    | GEO  |  |
| 7810 | TNNT1    | GEO  |  |
| 7811 | TNPO1    | GEO  |  |
| 7812 | TNPO2    | GEO  |  |
| 7813 | TNRC18   | GEO  |  |
| 7814 | TNRC6B   | GEO  |  |
| 7815 | TNS3     | GEO  |  |
| 7816 | TNS4     | GEO  |  |
| 7817 | TNXB     | GEO  |  |
| 7818 | TOB1     | GEO  |  |
| 7819 | TOLLIP   | GEO  |  |
| 7820 | TOM1L2   | GEO  |  |
| 7821 | TOMM40   | GEO  |  |
| 7822 | TOP1     | GEO  |  |
| 7823 | TOP3A    | GEO  |  |
| 7824 | TOP3B    | GEO  |  |
| 7825 | TOR1AIP2 | GEO  |  |
| 7826 | TOX      | GEO  |  |
| 7827 | TP53     | Both |  |
| 7828 | TP53BP1  | GAD  |  |
| 7829 | TP53BP2  | GAD  |  |
| 7830 | TP53I11  | GEO  |  |
| 7831 | TP53I5   | GEO  |  |
| 7832 | TP53TG5  | GEO  |  |
| 7833 | TP73     | Both |  |
| 7834 | TPBG     | GEO  |  |
| 7835 | TPD52L1  | GEO  |  |
| 7836 | TPK1     | GEO  |  |
| 7837 | TPM1     | GEO  |  |
| 7838 | TPM2     | GEO  |  |
| 7839 | TPM3     | GEO  |  |
| 7840 | TPM4     | GEO  |  |
| 7841 | TPMT     | Both |  |
| 7842 | TPP2     | GEO  |  |
| 7843 | TPPP     | Both |  |
| 7844 | TPR      | GEO  |  |
| 7845 | TPRG1    | GEO  |  |
| 7846 | TPRXL    | GEO  |  |
| 7847 | TPSAB1   | GEO  |  |
| 7848 | TPSB2    | GEO  |  |

|      |          |      |  |
|------|----------|------|--|
| 7849 | TPST1    | GEO  |  |
| 7850 | TPST2    | GEO  |  |
| 7851 | TPT1     | GEO  |  |
| 7852 | TPTE     | GEO  |  |
| 7853 | TRA      | GAD  |  |
| 7854 | TRABD    | GEO  |  |
| 7855 | TRAC     | GEO  |  |
| 7856 | TRAF3    | GEO  |  |
| 7857 | TRAF6    | GAD  |  |
| 7858 | TRAIP    | Both |  |
| 7859 | TRAK1    | GEO  |  |
| 7860 | TRAM2    | GEO  |  |
| 7861 | TRANK1   | GEO  |  |
| 7862 | TRAPPC10 | GEO  |  |
| 7863 | TRAPPC6A | GEO  |  |
| 7864 | TRBC1    | GEO  |  |
| 7865 | TRDMT1   | GEO  |  |
| 7866 | TRHDE    | GEO  |  |
| 7867 | TRIB1    | Both |  |
| 7868 | TRIF     | GEO  |  |
| 7869 | TRIM14   | GEO  |  |
| 7870 | TRIM15   | GEO  |  |
| 7871 | TRIM2    | GEO  |  |
| 7872 | TRIM21   | GEO  |  |
| 7873 | TRIM25   | GEO  |  |
| 7874 | TRIM29   | GEO  |  |
| 7875 | TRIM31   | GEO  |  |
| 7876 | TRIM33   | GEO  |  |
| 7877 | TRIM37   | GEO  |  |
| 7878 | TRIM38   | GEO  |  |
| 7879 | TRIM44   | GEO  |  |
| 7880 | TRIM55   | GEO  |  |
| 7881 | TRIM56   | GEO  |  |
| 7882 | TRIM7    | GEO  |  |
| 7883 | TRIM9    | GEO  |  |
| 7884 | TRIO     | GEO  |  |
| 7885 | TRIP11   | GEO  |  |
| 7886 | TRMT1    | GEO  |  |
| 7887 | TRMT112  | GEO  |  |
| 7888 | TRMT12   | GEO  |  |
| 7889 | TRMT2B   | GEO  |  |
| 7890 | TRND     | GAD  |  |
| 7891 | TRNG     | GAD  |  |
| 7892 | TRNL2    | GAD  |  |
| 7893 | TRNN     | GAD  |  |
| 7894 | TRNQ     | GAD  |  |
| 7895 | TRNR     | GAD  |  |
| 7896 | TRNT     | GAD  |  |
| 7897 | TROVE2   | GEO  |  |
| 7898 | TRPA1    | GEO  |  |

|      |          |      |  |
|------|----------|------|--|
| 7899 | TRPC4    | GEO  |  |
| 7900 | TRPC4AP  | GEO  |  |
| 7901 | TRPM4    | GEO  |  |
| 7902 | TRPM7    | GAD  |  |
| 7903 | TRPV1    | GEO  |  |
| 7904 | TRPV2    | GEO  |  |
| 7905 | TRPV6    | GEO  |  |
| 7906 | TRUB1    | GEO  |  |
| 7907 | TS13     | GAD  |  |
| 7908 | TSC1     | GAD  |  |
| 7909 | TSC2     | GAD  |  |
| 7910 | TSC22D3  | GEO  |  |
| 7911 | TSEN15   | GEO  |  |
| 7912 | TSGA14   | GEO  |  |
| 7913 | TSHZ3    | GEO  |  |
| 7914 | TSLP     | GEO  |  |
| 7915 | TSNAXIP1 | GEO  |  |
| 7916 | TSPAN11  | GEO  |  |
| 7917 | TSPAN12  | GEO  |  |
| 7918 | TSPAN13  | GEO  |  |
| 7919 | TSPAN14  | GEO  |  |
| 7920 | TSPAN2   | GEO  |  |
| 7921 | TSPAN3   | GEO  |  |
| 7922 | TSPAN31  | GEO  |  |
| 7923 | TSPAN33  | GEO  |  |
| 7924 | TSPAN4   | GEO  |  |
| 7925 | TSPAN8   | Both |  |
| 7926 | TSPY1    | GEO  |  |
| 7927 | TSPYL1   | GEO  |  |
| 7928 | TSSC4    | GEO  |  |
| 7929 | TTBK2    | GEO  |  |
| 7930 | TTC13    | GEO  |  |
| 7931 | TTC17    | GEO  |  |
| 7932 | TTC18    | GEO  |  |
| 7933 | TTC19    | GEO  |  |
| 7934 | TTC23    | GEO  |  |
| 7935 | TTC25    | GEO  |  |
| 7936 | TTC30B   | GEO  |  |
| 7937 | TTC37    | GEO  |  |
| 7938 | TTC39B   | GEO  |  |
| 7939 | TTC39C   | GEO  |  |
| 7940 | TTC5     | GEO  |  |
| 7941 | TTC6     | GEO  |  |
| 7942 | TTC7B    | GEO  |  |
| 7943 | TTK      | GAD  |  |
| 7944 | TTLL3    | GEO  |  |
| 7945 | TTLL5    | GEO  |  |
| 7946 | TTR      | GEO  |  |
| 7947 | TTRAP    | GEO  |  |
| 7948 | TTYH2    | GEO  |  |

|      |         |      |  |
|------|---------|------|--|
| 7949 | TUB     | GEO  |  |
| 7950 | TUBA1A  | GEO  |  |
| 7951 | TUBA4A  | GEO  |  |
| 7952 | TUBB2A  | GEO  |  |
| 7953 | TUBB2B  | GEO  |  |
| 7954 | TUBGCP2 | GEO  |  |
| 7955 | TUFM    | GEO  |  |
| 7956 | TUG1    | GEO  |  |
| 7957 | TUSC3   | GEO  |  |
| 7958 | TUSC5   | GEO  |  |
| 7959 | TUT1    | GEO  |  |
| 7960 | TWIST1  | GEO  |  |
| 7961 | TXLNG   | GEO  |  |
| 7962 | TXN     | GEO  |  |
| 7963 | TXNDC12 | GEO  |  |
| 7964 | TXNL4B  | GEO  |  |
| 7965 | TXNRD1  | Both |  |
| 7966 | TXNRD2  | GAD  |  |
| 7967 | TYK2    | GAD  |  |
| 7968 | TYMP    | GEO  |  |
| 7969 | TYROBP  | GEO  |  |
| 7970 | U2AF2   | GEO  |  |
| 7971 | UAP1L1  | GEO  |  |
| 7972 | UBA7    | GAD  |  |
| 7973 | UBAC2   | GEO  |  |
| 7974 | UBAP2   | GEO  |  |
| 7975 | UBC     | GEO  |  |
| 7976 | UBD     | GEO  |  |
| 7977 | UBE2C   | GEO  |  |
| 7978 | UBE2D2  | GEO  |  |
| 7979 | UBE2D3  | GEO  |  |
| 7980 | UBE2F   | GEO  |  |
| 7981 | UBE2G1  | GEO  |  |
| 7982 | UBE2G2  | GEO  |  |
| 7983 | UBE2K   | GEO  |  |
| 7984 | UBE2L3  | GAD  |  |
| 7985 | UBE2L6  | GEO  |  |
| 7986 | UBE2M   | GEO  |  |
| 7987 | UBE2N   | GEO  |  |
| 7988 | UBE2R2  | GEO  |  |
| 7989 | UBE2S   | GEO  |  |
| 7990 | UBE2V1  | GEO  |  |
| 7991 | UBE2W   | GEO  |  |
| 7992 | UBE3A   | GEO  |  |
| 7993 | UBE3C   | GEO  |  |
| 7994 | UBP1    | GEO  |  |
| 7995 | UBQLN2  | GEO  |  |
| 7996 | UBQLN4  | GEO  |  |
| 7997 | UBR4    | GEO  |  |
| 7998 | UBR5    | GEO  |  |

|      |         |      |  |
|------|---------|------|--|
| 7999 | UBXN6   | GEO  |  |
| 8000 | UCA1    | GEO  |  |
| 8001 | UCLH1   | GEO  |  |
| 8002 | UCLH3   | GEO  |  |
| 8003 | UCN3    | GEO  |  |
| 8004 | UCP2    | Both |  |
| 8005 | UGCG    | GEO  |  |
| 8006 | UGT1A   | GAD  |  |
| 8007 | UGT1A10 | Both |  |
| 8008 | UGT1A3  | Both |  |
| 8009 | UGT1A4  | Both |  |
| 8010 | UGT1A6  | Both |  |
| 8011 | UGT1A7  | GAD  |  |
| 8012 | UGT1A9  | GAD  |  |
| 8013 | UGT2A3  | GEO  |  |
| 8014 | UGT2B4  | Both |  |
| 8015 | UGT2B7  | Both |  |
| 8016 | UGT8    | GEO  |  |
| 8017 | UHKM1   | GEO  |  |
| 8018 | UHRF2   | GEO  |  |
| 8019 | ULA4    | GEO  |  |
| 8020 | ULBP2   | GEO  |  |
| 8021 | ULK4    | GEO  |  |
| 8022 | UMODL1  | GEO  |  |
| 8023 | UMPS    | GAD  |  |
| 8024 | UNC119  | GEO  |  |
| 8025 | UNC13A  | GEO  |  |
| 8026 | UNC5A   | GEO  |  |
| 8027 | UNC5B   | GEO  |  |
| 8028 | UNC5CL  | GEO  |  |
| 8029 | UNC93B1 | GEO  |  |
| 8030 | UNKL    | GEO  |  |
| 8031 | UNQ9368 | GEO  |  |
| 8032 | UPB1    | Both |  |
| 8033 | UPF1    | GEO  |  |
| 8034 | UPF3A   | GEO  |  |
| 8035 | UPK3A   | GEO  |  |
| 8036 | UPK3B   | GEO  |  |
| 8037 | UQCC    | GEO  |  |
| 8038 | UQCRC1  | GEO  |  |
| 8039 | URB1    | GEO  |  |
| 8040 | URG4    | GEO  |  |
| 8041 | USE1    | GEO  |  |
| 8042 | USH1C   | GEO  |  |
| 8043 | USH2A   | GEO  |  |
| 8044 | USO1    | GEO  |  |
| 8045 | USP1    | GEO  |  |
| 8046 | USP12   | GAD  |  |
| 8047 | USP13   | GEO  |  |
| 8048 | USP14   | GEO  |  |

|      |        |      |  |
|------|--------|------|--|
| 8049 | USP18  | GEO  |  |
| 8050 | USP19  | GEO  |  |
| 8051 | USP22  | GEO  |  |
| 8052 | USP24  | GEO  |  |
| 8053 | USP25  | GAD  |  |
| 8054 | USP33  | GEO  |  |
| 8055 | USP34  | GEO  |  |
| 8056 | USP36  | GEO  |  |
| 8057 | USP4   | GAD  |  |
| 8058 | USP42  | GEO  |  |
| 8059 | USP45  | GEO  |  |
| 8060 | USP48  | GEO  |  |
| 8061 | USP49  | GEO  |  |
| 8062 | USP53  | GEO  |  |
| 8063 | USP7   | GEO  |  |
| 8064 | USP9Y  | GEO  |  |
| 8065 | UST    | GEO  |  |
| 8066 | UTP11L | GEO  |  |
| 8067 | UTP14A | GEO  |  |
| 8068 | UTRN   | GEO  |  |
| 8069 | UXS1   | GEO  |  |
| 8070 | VAMP1  | GEO  |  |
| 8071 | VAMP8  | GEO  |  |
| 8072 | VAPA   | GEO  |  |
| 8073 | VAPB   | GEO  |  |
| 8074 | VASN   | GEO  |  |
| 8075 | VAV3   | GEO  |  |
| 8076 | VCAN   | GEO  |  |
| 8077 | VCL    | GEO  |  |
| 8078 | VDAC1  | GEO  |  |
| 8079 | VDR    | GAD  |  |
| 8080 | VEGF   | GAD  |  |
| 8081 | VEGFA  | Both |  |
| 8082 | VGf    | GEO  |  |
| 8083 | VGLL1  | GEO  |  |
| 8084 | VGLL4  | GEO  |  |
| 8085 | VHL    | GAD  |  |
| 8086 | VIL1   | GEO  |  |
| 8087 | VIM    | GEO  |  |
| 8088 | VKORC1 | GEO  |  |
| 8089 | VMA21  | GEO  |  |
| 8090 | VMD2L1 | GEO  |  |
| 8091 | VMD2L2 | GEO  |  |
| 8092 | VNN1   | GEO  |  |
| 8093 | VNN3   | GEO  |  |
| 8094 | VPS13B | GEO  |  |
| 8095 | VPS13C | GEO  |  |
| 8096 | VPS13D | GEO  |  |
| 8097 | VPS18  | GEO  |  |
| 8098 | VPS26A | GEO  |  |



|      |         |     |  |
|------|---------|-----|--|
| 8099 | VPS37C  | GEO |  |
| 8100 | VPS4B   | GEO |  |
| 8101 | VPS53   | GEO |  |
| 8102 | VPS8    | GEO |  |
| 8103 | VRK2    | GEO |  |
| 8104 | VSIG4   | GEO |  |
| 8105 | VSTM2A  | GEO |  |
| 8106 | VSTM2L  | GEO |  |
| 8107 | VTN     | GEO |  |
| 8108 | VWA5B2  | GEO |  |
| 8109 | VWCE    | GEO |  |
| 8110 | VWDE    | GEO |  |
| 8111 | WAC     | GEO |  |
| 8112 | WAS     | GEO |  |
| 8113 | WASF3   | GEO |  |
| 8114 | WASH3P  | GEO |  |
| 8115 | WBP4    | GEO |  |
| 8116 | WBSCR22 | GEO |  |
| 8117 | WBSCR27 | GEO |  |
| 8118 | WDFY3   | GEO |  |
| 8119 | WDR1    | GEO |  |
| 8120 | WDR12   | GEO |  |
| 8121 | WDR31   | GEO |  |
| 8122 | WDR33   | GEO |  |
| 8123 | WDR4    | GEO |  |
| 8124 | WDR43   | GEO |  |
| 8125 | WDR46   | GEO |  |
| 8126 | WDR5    | GEO |  |
| 8127 | WDR51B  | GEO |  |
| 8128 | WDR52   | GEO |  |
| 8129 | WDR59   | GEO |  |
| 8130 | WDR61   | GEO |  |
| 8131 | WDR67   | GEO |  |
| 8132 | WDR7    | GEO |  |
| 8133 | WDR71   | GEO |  |
| 8134 | WDR72   | GEO |  |
| 8135 | WDR77   | GEO |  |
| 8136 | WDR78   | GEO |  |
| 8137 | WDR79   | GEO |  |
| 8138 | WDR86   | GEO |  |
| 8139 | WDR90   | GEO |  |
| 8140 | WDSOF1  | GEO |  |
| 8141 | WDYHV1  | GEO |  |
| 8142 | WFDC1   | GEO |  |
| 8143 | WFDC2   | GEO |  |
| 8144 | WHAMM   | GEO |  |
| 8145 | WHAMML1 | GEO |  |
| 8146 | WHDC1L1 | GEO |  |
| 8147 | WHSC1   | GEO |  |
| 8148 | WIF1    | GAD |  |

|      |         |      |  |
|------|---------|------|--|
| 8149 | WIPF1   | GEO  |  |
| 8150 | WISP1   | Both |  |
| 8151 | WISP2   | GEO  |  |
| 8152 | WISP3   | GAD  |  |
| 8153 | WLS     | GEO  |  |
| 8154 | WNK1    | GEO  |  |
| 8155 | WNK2    | GEO  |  |
| 8156 | WNK4    | GEO  |  |
| 8157 | WNT10A  | GEO  |  |
| 8158 | WNT11   | GEO  |  |
| 8159 | WNT16   | GEO  |  |
| 8160 | WNT2B   | GAD  |  |
| 8161 | WNT4    | GEO  |  |
| 8162 | WNT5A   | GEO  |  |
| 8163 | WNT6    | GEO  |  |
| 8164 | WNT7A   | GEO  |  |
| 8165 | WNT7B   | GEO  |  |
| 8166 | WRN     | GAD  |  |
| 8167 | WSB1    | GEO  |  |
| 8168 | WSCD1   | GEO  |  |
| 8169 | WT1     | GEO  |  |
| 8170 | WTAP    | GEO  |  |
| 8171 | WWC2    | GEO  |  |
| 8172 | WWP1    | GEO  |  |
| 8173 | XCR1    | GEO  |  |
| 8174 | XDH     | Both |  |
| 8175 | XIAP    | GEO  |  |
| 8176 | XIST    | GEO  |  |
| 8177 | XK      | GEO  |  |
| 8178 | XKR9    | GEO  |  |
| 8179 | XKRX    | GEO  |  |
| 8180 | XLKD1   | GEO  |  |
| 8181 | XPA     | GAD  |  |
| 8182 | XPC     | GAD  |  |
| 8183 | XPNPEP2 | GEO  |  |
| 8184 | XPO1    | GEO  |  |
| 8185 | XPO7    | GEO  |  |
| 8186 | XRCC1   | GAD  |  |
| 8187 | XRCC2   | GAD  |  |
| 8188 | XRCC3   | GAD  |  |
| 8189 | XRCC5   | GAD  |  |
| 8190 | XRRA1   | GEO  |  |
| 8191 | YAP1    | GEO  |  |
| 8192 | YBX2    | GEO  |  |
| 8193 | YIF1A   | GEO  |  |
| 8194 | YIPF3   | GEO  |  |
| 8195 | YIPF5   | GEO  |  |
| 8196 | YJEFN3  | GEO  |  |
| 8197 | YKT6    | GEO  |  |
| 8198 | YLPM1   | GEO  |  |

|      |          |     |  |
|------|----------|-----|--|
| 8199 | YPEL1    | GEO |  |
| 8200 | YPEL5    | GEO |  |
| 8201 | YTHDC1   | GEO |  |
| 8202 | YTHDC2   | GEO |  |
| 8203 | YTHDF1   | GEO |  |
| 8204 | YWHAQ    | GEO |  |
| 8205 | ZADH2    | GEO |  |
| 8206 | ZAK      | GEO |  |
| 8207 | ZAP70    | GEO |  |
| 8208 | ZBED2    | GEO |  |
| 8209 | ZBED5    | GEO |  |
| 8210 | ZBTB1    | GEO |  |
| 8211 | ZBTB10   | GEO |  |
| 8212 | ZBTB16   | GEO |  |
| 8213 | ZBTB20   | GEO |  |
| 8214 | ZBTB26   | GEO |  |
| 8215 | ZBTB33   | GEO |  |
| 8216 | ZBTB38   | GAD |  |
| 8217 | ZBTB4    | GEO |  |
| 8218 | ZBTB40   | GEO |  |
| 8219 | ZBTB44   | GEO |  |
| 8220 | ZBTB46   | GEO |  |
| 8221 | ZBTB47   | GEO |  |
| 8222 | ZBTB7A   | GEO |  |
| 8223 | ZBTB7C   | GEO |  |
| 8224 | ZBTB8    | GEO |  |
| 8225 | ZC3H11A  | GEO |  |
| 8226 | ZC3H12A  | GEO |  |
| 8227 | ZC3H13   | GEO |  |
| 8228 | ZC3H14   | GEO |  |
| 8229 | ZC3H4    | GEO |  |
| 8230 | ZC3H7A   | GEO |  |
| 8231 | ZC3H7B   | GEO |  |
| 8232 | ZCCHC10  | GEO |  |
| 8233 | ZCCHC11  | GEO |  |
| 8234 | ZCCHC2   | GEO |  |
| 8235 | ZCCHC4   | GEO |  |
| 8236 | ZCCHC7   | GEO |  |
| 8237 | ZCRB1    | GEO |  |
| 8238 | ZDBF2    | GEO |  |
| 8239 | ZDHH1C   | GAD |  |
| 8240 | ZDHH1C2  | GEO |  |
| 8241 | ZDHH1C4  | GEO |  |
| 8242 | ZDHH1C7  | GEO |  |
| 8243 | ZDHH1C21 | GEO |  |
| 8244 | ZDHH1C22 | GEO |  |
| 8245 | ZDHH1C6  | GEO |  |
| 8246 | ZDHH1C8P | GEO |  |
| 8247 | ZDHH1C9  | GEO |  |
| 8248 | ZFAND2A  | GEO |  |

|      |          |      |  |
|------|----------|------|--|
| 8249 | ZFAND2B  | GEO  |  |
| 8250 | ZFAND5   | GEO  |  |
| 8251 | ZFAND6   | Both |  |
| 8252 | ZFAT     | GAD  |  |
| 8253 | ZFP14    | GEO  |  |
| 8254 | ZFP3     | GEO  |  |
| 8255 | ZFP36    | GEO  |  |
| 8256 | ZFP36L1  | GEO  |  |
| 8257 | ZFP37    | GEO  |  |
| 8258 | ZFP41    | GEO  |  |
| 8259 | ZFP62    | GEO  |  |
| 8260 | ZFR2     | GEO  |  |
| 8261 | ZFYVE1   | GEO  |  |
| 8262 | ZFYVE19  | GEO  |  |
| 8263 | ZG16B    | GEO  |  |
| 8264 | ZGPAT    | GAD  |  |
| 8265 | ZHX1     | GEO  |  |
| 8266 | ZIC2     | GEO  |  |
| 8267 | ZKSCAN1  | GEO  |  |
| 8268 | ZMAT2    | GEO  |  |
| 8269 | ZMIZ2    | GEO  |  |
| 8270 | ZMPSTE24 | GEO  |  |
| 8271 | ZMYM1    | GEO  |  |
| 8272 | ZMYM5    | GEO  |  |
| 8273 | ZMYND11  | GEO  |  |
| 8274 | ZMYND19  | GEO  |  |
| 8275 | ZMYND8   | GEO  |  |
| 8276 | ZNF101   | GEO  |  |
| 8277 | ZNF114   | GEO  |  |
| 8278 | ZNF124   | GEO  |  |
| 8279 | ZNF133   | GEO  |  |
| 8280 | ZNF160   | GEO  |  |
| 8281 | ZNF165   | GEO  |  |
| 8282 | ZNF18    | GEO  |  |
| 8283 | ZNF185   | GEO  |  |
| 8284 | ZNF197   | GEO  |  |
| 8285 | ZNF204   | GEO  |  |
| 8286 | ZNF204P  | GEO  |  |
| 8287 | ZNF207   | GEO  |  |
| 8288 | ZNF219   | GEO  |  |
| 8289 | ZNF223   | GEO  |  |
| 8290 | ZNF23    | GEO  |  |
| 8291 | ZNF230   | GEO  |  |
| 8292 | ZNF235   | GEO  |  |
| 8293 | ZNF236   | GEO  |  |
| 8294 | ZNF238   | GEO  |  |
| 8295 | ZNF248   | GEO  |  |
| 8296 | ZNF25    | GEO  |  |
| 8297 | ZNF252   | GEO  |  |
| 8298 | ZNF253   | GEO  |  |

|      |         |     |  |
|------|---------|-----|--|
| 8299 | ZNF259  | GEO |  |
| 8300 | ZNF260  | GEO |  |
| 8301 | ZNF264  | GEO |  |
| 8302 | ZNF266  | GAD |  |
| 8303 | ZNF271  | GEO |  |
| 8304 | ZNF273  | GEO |  |
| 8305 | ZNF280B | GEO |  |
| 8306 | ZNF300  | GAD |  |
| 8307 | ZNF318  | GEO |  |
| 8308 | ZNF321  | GEO |  |
| 8309 | ZNF323  | GEO |  |
| 8310 | ZNF331  | GEO |  |
| 8311 | ZNF33A  | GEO |  |
| 8312 | ZNF33B  | GEO |  |
| 8313 | ZNF35   | GEO |  |
| 8314 | ZNF358  | GEO |  |
| 8315 | ZNF362  | GEO |  |
| 8316 | ZNF364  | GEO |  |
| 8317 | ZNF365  | GAD |  |
| 8318 | ZNF37A  | GEO |  |
| 8319 | ZNF37B  | GEO |  |
| 8320 | ZNF385B | GEO |  |
| 8321 | ZNF396  | GEO |  |
| 8322 | ZNF409  | GEO |  |
| 8323 | ZNF410  | GEO |  |
| 8324 | ZNF420  | GEO |  |
| 8325 | ZNF432  | GEO |  |
| 8326 | ZNF433  | GEO |  |
| 8327 | ZNF438  | GEO |  |
| 8328 | ZNF440  | GEO |  |
| 8329 | ZNF451  | GEO |  |
| 8330 | ZNF460  | GEO |  |
| 8331 | ZNF468  | GEO |  |
| 8332 | ZNF474  | GEO |  |
| 8333 | ZNF483  | GEO |  |
| 8334 | ZNF488  | GEO |  |
| 8335 | ZNF503  | GEO |  |
| 8336 | ZNF506  | GEO |  |
| 8337 | ZNF511  | GEO |  |
| 8338 | ZNF512  | GEO |  |
| 8339 | ZNF521  | GEO |  |
| 8340 | ZNF525  | GEO |  |
| 8341 | ZNF529  | GEO |  |
| 8342 | ZNF543  | GEO |  |
| 8343 | ZNF557  | GEO |  |
| 8344 | ZNF558  | GEO |  |
| 8345 | ZNF559  | GEO |  |
| 8346 | ZNF568  | GEO |  |
| 8347 | ZNF569  | GEO |  |
| 8348 | ZNF57   | GEO |  |

|      |         |     |  |
|------|---------|-----|--|
| 8349 | ZNF587  | GEO |  |
| 8350 | ZNF593  | GEO |  |
| 8351 | ZNF606  | GEO |  |
| 8352 | ZNF608  | GEO |  |
| 8353 | ZNF614  | GEO |  |
| 8354 | ZNF618  | GEO |  |
| 8355 | ZNF638  | GEO |  |
| 8356 | ZNF639  | GEO |  |
| 8357 | ZNF641  | GEO |  |
| 8358 | ZNF649  | GEO |  |
| 8359 | ZNF655  | GEO |  |
| 8360 | ZNF662  | GEO |  |
| 8361 | ZNF677  | GEO |  |
| 8362 | ZNF678  | GAD |  |
| 8363 | ZNF680  | GEO |  |
| 8364 | ZNF7    | GEO |  |
| 8365 | ZNF703  | GEO |  |
| 8366 | ZNF704  | GEO |  |
| 8367 | ZNF707  | GEO |  |
| 8368 | ZNF710  | GEO |  |
| 8369 | ZNF711  | GEO |  |
| 8370 | ZNF721  | GEO |  |
| 8371 | ZNF750  | GEO |  |
| 8372 | ZNF763  | GEO |  |
| 8373 | ZNF771  | GEO |  |
| 8374 | ZNF776  | GEO |  |
| 8375 | ZNF777  | GEO |  |
| 8376 | ZNF781  | GEO |  |
| 8377 | ZNF785  | GEO |  |
| 8378 | ZNF791  | GEO |  |
| 8379 | ZNF800  | GEO |  |
| 8380 | ZNF814  | GEO |  |
| 8381 | ZNF816A | GEO |  |
| 8382 | ZNF83   | GEO |  |
| 8383 | ZNF830  | GEO |  |
| 8384 | ZNF91   | GEO |  |
| 8385 | ZNHIT4  | GEO |  |
| 8386 | ZNRD1   | GEO |  |
| 8387 | ZP3     | GEO |  |
| 8388 | ZPBP2M  | GAD |  |
| 8389 | ZSCAN20 | GEO |  |
| 8390 | ZSCAN29 | GEO |  |
| 8391 | ZSWIM6  | GEO |  |
| 8392 | ZWILCH  | GEO |  |

**Table S8**

| Index | Concept Name          | Gene Symbol | P Value  | Fold-change | Reliability |
|-------|-----------------------|-------------|----------|-------------|-------------|
| 1     | A2 immunologic symbol | RECQL       | 0.034624 | 2.050608    | *           |
| 2     | A2 immunologic symbol | CASP6       | 0.032689 | 2.052381    | *           |
| 3     | A2 immunologic symbol | SDCCAG1     | 0.032204 | 2.077786    | *           |
| 4     | A2 immunologic symbol | HPGD        | 0.019631 | 2.129045    | *           |
| 5     | A2 immunologic symbol | DHRS8       | 0.024697 | 2.177333    | *           |
| 6     | A2 immunologic symbol | LMO6        | 0.00842  | 2.274688    | *           |
| 7     | A2 immunologic symbol | PIK3CD      | 0.024979 | 2.287016    | *           |
| 8     | A2 immunologic symbol | ARMC8       | 0.016887 | 2.395928    | *           |
| 9     | A2 immunologic symbol | LOC442198   | 0.002815 | 2.42495     | *           |
| 10    | A2 immunologic symbol | COPS2       | 0.002843 | 2.445779    | *           |
| 11    | A2 immunologic symbol | DHRS9       | 0.017019 | 2.445886    | *           |
| 12    | A2 immunologic symbol | XRCC4       | 0.000009 | 2.4507      | *           |
| 13    | A2 immunologic symbol | SE57-1      | 0.001417 | 2.659529    | *           |
| 14    | A2 immunologic symbol | HMGA1       | 0.015533 | 3.141493    | *           |
| 15    | A2 immunologic symbol | LXN         | 0.000021 | 3.400538    | *           |
| 16    | Adenocarcinoma        | KIAA1324L   | 0        | -18.457231  | *           |
| 17    | Adenocarcinoma        | C10orf116   | 0.000079 | -17.403378  | *           |
| 18    | Adenocarcinoma        | CXXC4       | 0.011913 | -13.989064  | *           |
| 19    | Adenocarcinoma        | ETV1        | 0.000269 | -10.047961  | *           |
| 20    | Adenocarcinoma        | PEG10       | 0.000017 | -10.000323  | *           |
| 21    | Adenocarcinoma        | MYOT        | 0        | -8.832191   | *           |
| 22    | Adenocarcinoma        | ABCG2       | 0.000006 | -8.486486   | *           |
| 23    | Adenocarcinoma        | ELOVL5      | 0.002373 | -8.192065   | *           |
| 24    | Adenocarcinoma        | CHP2        | 0        | -7.890496   | *           |
| 25    | Adenocarcinoma        | ADAMDEC1    | 0        | -7.583396   | *           |
| 26    | Adenocarcinoma        | STC2        | 0.001389 | -7.084797   | *           |
| 27    | Adenocarcinoma        | DMKN        | 0.000002 | -6.451331   | *           |
| 28    | Adenocarcinoma        | GCNT2       | 0.000012 | -6.439363   | *           |
| 29    | Adenocarcinoma        | CWH43       | 0.000007 | -6.340542   | *           |
| 30    | Adenocarcinoma        | PKIB        | 0        | -6.214375   | *           |
| 31    | Adenocarcinoma        | SYT17       | 0.012334 | -5.998397   | *           |
| 32    | Adenocarcinoma        | PYGL        | 0.000515 | -5.887689   | *           |
| 33    | Adenocarcinoma        | CXCL12      | 0        | -5.810221   | *           |
| 34    | Adenocarcinoma        | SGCE        | 0.000049 | -5.555721   | *           |
| 35    | Adenocarcinoma        | FKBP1B      | 0.006104 | -5.456181   | *           |
| 36    | Adenocarcinoma        | ARHGEF10    | 0.00136  | -5.2396     | *           |
| 37    | Adenocarcinoma        | GUCA2A      | 0        | -5.139376   | *           |
| 38    | Adenocarcinoma        | SYNE2       | 0.000007 | -5.052631   | *           |
| 39    | Adenocarcinoma        | FNBP1       | 0.000342 | -4.850535   | *           |
| 40    | Adenocarcinoma        | F13A1       | 0        | -4.646816   | *           |
| 41    | Adenocarcinoma        | DHRS11      | 0.000021 | -4.552529   | *           |
| 42    | Adenocarcinoma        | TERT        | 0.000343 | -4.323769   | *           |
| 43    | Adenocarcinoma        | HSD17B2     | 0.000052 | -4.175568   | *           |
| 44    | Adenocarcinoma        | UGT2B15     | 0.000038 | -4.136587   | *           |
| 45    | Adenocarcinoma        | ABCA8       | 0        | -4.100368   | *           |
| 46    | Adenocarcinoma        | AGPAT9      | 0.000063 | -4.032915   | *           |
| 47    | Adenocarcinoma        | PADI2       | 0        | -4.009806   | *           |
| 48    | Adenocarcinoma        | LRRC19      | 0.000069 | -4.006808   | *           |

|    |                |              |          |           |   |
|----|----------------|--------------|----------|-----------|---|
| 49 | Adenocarcinoma | ENPP1        | 0.014929 | -3.88051  | * |
| 50 | Adenocarcinoma | TSPAN7       | 0        | -3.857845 | * |
| 51 | Adenocarcinoma | HPGD         | 0.000201 | -3.819098 | * |
| 52 | Adenocarcinoma | FADS1        | 0.001623 | -3.794635 | * |
| 53 | Adenocarcinoma | AKR1B10      | 0.000036 | -3.779094 | * |
| 54 | Adenocarcinoma | ARL14        | 0.000007 | -3.700351 | * |
| 55 | Adenocarcinoma | C17orf51     | 0.000722 | -3.679578 | * |
| 56 | Adenocarcinoma | CC2D2A       | 0.001301 | -3.660587 | * |
| 57 | Adenocarcinoma | RUNDC3B      | 0.000001 | -3.626594 | * |
| 58 | Adenocarcinoma | C10orf99     | 0.000028 | -3.620081 | * |
| 59 | Adenocarcinoma | HIGD1A       | 0.000009 | -3.524229 | * |
| 60 | Adenocarcinoma | PAX6         | 0.011213 | -3.414723 | * |
| 61 | Adenocarcinoma | ZNF575       | 0.000035 | -3.378636 | * |
| 62 | Adenocarcinoma | FLJ32063     | 0.000003 | -3.350273 | * |
| 63 | Adenocarcinoma | FABP4        | 0        | -3.34833  | * |
| 64 | Adenocarcinoma | AHCYL2       | 0.000007 | -3.330288 | * |
| 65 | Adenocarcinoma | C2orf88      | 0.000052 | -3.296037 | * |
| 66 | Adenocarcinoma | GALNTL4      | 0.000002 | -3.263114 | * |
| 67 | Adenocarcinoma | CA12         | 0.00004  | -3.220574 | * |
| 68 | Adenocarcinoma | PLCE1        | 0.000012 | -3.149416 | * |
| 69 | Adenocarcinoma | SCGN         | 0.000292 | -3.132719 | * |
| 70 | Adenocarcinoma | ARHGAP44     | 0.000001 | -3.126782 | * |
| 71 | Adenocarcinoma | SLC4A4       | 0.00007  | -3.104855 | * |
| 72 | Adenocarcinoma | FCHO1        | 0.000743 | -3.027181 | * |
| 73 | Adenocarcinoma | SULT1A2      | 0.000079 | -2.995262 | * |
| 74 | Adenocarcinoma | DENND2A      | 0.000061 | -2.97707  | * |
| 75 | Adenocarcinoma | TSPAN1       | 0.000226 | -2.971613 | * |
| 76 | Adenocarcinoma | ADSSL1       | 0.000081 | -2.839162 | * |
| 77 | Adenocarcinoma | CLDN23       | 0.0002   | -2.834475 | * |
| 78 | Adenocarcinoma | LOC400573    | 0.000123 | -2.834344 | * |
| 79 | Adenocarcinoma | SLC9A2       | 0        | -2.813065 | * |
| 80 | Adenocarcinoma | MMP28        | 0.000034 | -2.79525  | * |
| 81 | Adenocarcinoma | RASAL1       | 0.00043  | -2.788003 | * |
| 82 | Adenocarcinoma | PREP         | 0.000223 | -2.778618 | * |
| 83 | Adenocarcinoma | TRMT11       | 0.003115 | -2.773075 | * |
| 84 | Adenocarcinoma | PAQR5        | 0.000042 | -2.689435 | * |
| 85 | Adenocarcinoma | LOC100287411 | 0.000004 | -2.686546 | * |
| 86 | Adenocarcinoma | SMTN         | 0.000006 | -2.682277 | * |
| 87 | Adenocarcinoma | PPP2R3A      | 0.000044 | -2.652001 | * |
| 88 | Adenocarcinoma | SELENBP1     | 0.000389 | -2.638804 | * |
| 89 | Adenocarcinoma | NR5A2        | 0.0003   | -2.636983 | * |
| 90 | Adenocarcinoma | CPM          | 0.000051 | -2.621781 | * |
| 91 | Adenocarcinoma | FZD9         | 0.000734 | -2.619644 | * |
| 92 | Adenocarcinoma | HLA-DMA      | 0.013339 | -2.592323 | * |
| 93 | Adenocarcinoma | SLC4A11      | 0.002357 | -2.551325 | * |
| 94 | Adenocarcinoma | PAM          | 0.001986 | -2.533144 | * |
| 95 | Adenocarcinoma | LOC643837    | 0.002357 | -2.510325 | * |
| 96 | Adenocarcinoma | ACVR1C       | 0.000001 | -2.484118 | * |
| 97 | Adenocarcinoma | PPID         | 0.000025 | -2.462194 | * |
| 98 | Adenocarcinoma | GOLM1        | 0.000252 | -2.421836 | * |

|     |                |              |          |           |   |
|-----|----------------|--------------|----------|-----------|---|
| 99  | Adenocarcinoma | SPPL2A       | 0.000009 | -2.398902 | * |
| 100 | Adenocarcinoma | NR3C2        | 0        | -2.393348 | * |
| 101 | Adenocarcinoma | STMN2        | 0        | -2.356428 | * |
| 102 | Adenocarcinoma | CITED1       | 0.018098 | -2.318043 | * |
| 103 | Adenocarcinoma | CUZD1        | 0.018448 | -2.286498 | * |
| 104 | Adenocarcinoma | TUBB3        | 0.01862  | -2.25415  | * |
| 105 | Adenocarcinoma | FLJ36848     | 0.000256 | -2.20681  | * |
| 106 | Adenocarcinoma | WASF1        | 0.003376 | -2.193545 | * |
| 107 | Adenocarcinoma | SULT1A1      | 0.000014 | -2.150609 | * |
| 108 | Adenocarcinoma | GPRIN1       | 0.017406 | -2.116363 | * |
| 109 | Adenocarcinoma | ATP5S        | 0.000026 | -2.103186 | * |
| 110 | Adenocarcinoma | TERF2        | 0.000034 | -2.084908 | * |
| 111 | Adenocarcinoma | FAM47E       | 0.00003  | -2.074512 | * |
| 112 | Adenocarcinoma | C6orf35      | 0.003732 | -2.059435 | * |
| 113 | Adenocarcinoma | FXYP1        | 0.000047 | -2.055213 | * |
| 114 | Adenocarcinoma | UGDH         | 0.000001 | -2.048215 | * |
| 115 | Adenocarcinoma | NR4A2        | 0.000059 | -2.023673 | * |
| 116 | Adenocarcinoma | DZIP3        | 0.000445 | -2.009873 | * |
| 117 | Adenocarcinoma | SGK2         | 0.000043 | -2.008301 | * |
| 118 | Adenocarcinoma | LOC100289019 | 0.000053 | -2.00295  | * |
| 119 | Adenocarcinoma | AQR          | 0.000296 | 2.013872  | * |
| 120 | Adenocarcinoma | TMEM63A      | 0.008735 | 2.023791  | * |
| 121 | Adenocarcinoma | PDXK         | 0.003521 | 2.060404  | * |
| 122 | Adenocarcinoma | TMEM125      | 0.001162 | 2.062651  | * |
| 123 | Adenocarcinoma | ZNF592       | 0.000427 | 2.076689  | * |
| 124 | Adenocarcinoma | PDS5B        | 0.006445 | 2.122209  | * |
| 125 | Adenocarcinoma | FLJ44606     | 0.000048 | 2.122325  | * |
| 126 | Adenocarcinoma | SUSD1        | 0.000374 | 2.137045  | * |
| 127 | Adenocarcinoma | PC           | 0.006981 | 2.162074  | * |
| 128 | Adenocarcinoma | GLB1L2       | 0.002379 | 2.201614  | * |
| 129 | Adenocarcinoma | CDC42BPA     | 0.006472 | 2.23118   | * |
| 130 | Adenocarcinoma | PERLD1       | 0.000202 | 2.239739  | * |
| 131 | Adenocarcinoma | FLJ32255     | 0.007139 | 2.25239   | * |
| 132 | Adenocarcinoma | MYO6         | 0.005232 | 2.256995  | * |
| 133 | Adenocarcinoma | TSHZ1        | 0.002619 | 2.258493  | * |
| 134 | Adenocarcinoma | RAB11FIP4    | 0.000193 | 2.259819  | * |
| 135 | Adenocarcinoma | ERBB2        | 0.005397 | 2.261878  | * |
| 136 | Adenocarcinoma | LITAF        | 0.001964 | 2.30379   | * |
| 137 | Adenocarcinoma | MAP3K1       | 0.000315 | 2.351966  | * |
| 138 | Adenocarcinoma | SFXN5        | 0.001824 | 2.360293  | * |
| 139 | Adenocarcinoma | C7orf41      | 0.015161 | 2.370543  | * |
| 140 | Adenocarcinoma | RAPH1        | 0.000951 | 2.451737  | * |
| 141 | Adenocarcinoma | DEGS2        | 0.001696 | 2.452281  | * |
| 142 | Adenocarcinoma | SEMA4D       | 0.000714 | 2.508583  | * |
| 143 | Adenocarcinoma | MYLIP        | 0.007311 | 2.533921  | * |
| 144 | Adenocarcinoma | ADAL         | 0.006595 | 2.538842  | * |
| 145 | Adenocarcinoma | GNG4         | 0        | 2.58884   | * |
| 146 | Adenocarcinoma | MPZL2        | 0.008012 | 2.610388  | * |
| 147 | Adenocarcinoma | EPB41L1      | 0.015535 | 2.634985  | * |
| 148 | Adenocarcinoma | ZNF846       | 0.000075 | 2.640985  | * |

|     |                                   |          |          |           |   |
|-----|-----------------------------------|----------|----------|-----------|---|
| 149 | Adenocarcinoma                    | LRG1     | 0.000004 | 2.679377  | * |
| 150 | Adenocarcinoma                    | ITGB8    | 0.002911 | 2.8341    | * |
| 151 | Adenocarcinoma                    | ANXA9    | 0.002645 | 2.859143  | * |
| 152 | Adenocarcinoma                    | ZNF311   | 0.000006 | 2.916672  | * |
| 153 | Adenocarcinoma                    | EMP2     | 0        | 2.937258  | * |
| 154 | Adenocarcinoma                    | C1orf210 | 0.005073 | 3.074608  | * |
| 155 | Adenocarcinoma                    | CLN6     | 0.000026 | 3.107396  | * |
| 156 | Adenocarcinoma                    | ILDR1    | 0.001696 | 3.135222  | * |
| 157 | Adenocarcinoma                    | FLVCR2   | 0.001619 | 3.136576  | * |
| 158 | Adenocarcinoma                    | ARRB1    | 0.001064 | 3.503076  | * |
| 159 | Adenocarcinoma                    | SULT2B1  | 0.002194 | 3.553501  | * |
| 160 | Adenocarcinoma                    | PRSS23   | 0.000746 | 3.686045  | * |
| 161 | Adenocarcinoma                    | HNF1B    | 0.000005 | 3.743232  | * |
| 162 | Adenocarcinoma                    | ZNF426   | 0.004086 | 3.758404  | * |
| 163 | Adenocarcinoma                    | TMPRSS13 | 0.000011 | 4.056654  | * |
| 164 | Adenocarcinoma                    | RAB27B   | 0.001103 | 4.173163  | * |
| 165 | Adenocarcinoma                    | CA9      | 0.007306 | 4.241781  | * |
| 166 | Adenocarcinoma                    | PCSK6    | 0.000006 | 4.313309  | * |
| 167 | Adenocarcinoma                    | VIPR1    | 0.002716 | 4.590326  | * |
| 168 | Adenocarcinoma                    | C9orf68  | 0.000667 | 4.683553  | * |
| 169 | Adenocarcinoma                    | MAP3K8   | 0.001798 | 4.862673  | * |
| 170 | Adenocarcinoma                    | GPR115   | 0.000714 | 5.636709  | * |
| 171 | Adenocarcinoma                    | TACSTD2  | 0.000025 | 5.877645  | * |
| 172 | Adenocarcinoma                    | RASEF    | 0.015961 | 7.831564  | * |
| 173 | Adenocarcinoma                    | LIMCH1   | 0.00008  | 7.831938  | * |
| 174 | Adenocarcinoma                    | FRMD4B   | 0.000042 | 8.351405  | * |
| 175 | Adenocarcinoma                    | ERAP2    | 0.000144 | 9.820729  | * |
| 176 | Adenocarcinoma                    | C1orf59  | 0.000653 | 11.139442 | * |
| 177 | Adenocarcinoma                    | GPX3     | 0.000001 | 12.302366 | * |
| 178 | Adenocarcinoma                    | QPCT     | 0.000144 | 43.221112 | * |
| 179 | Adenocarcinoma of large intestine | MYOT     | 0        | -8.832191 | * |
| 180 | Adenocarcinoma of large intestine | PLP1     | 0        | -8.565039 | * |
| 181 | Adenocarcinoma of large intestine | RAVER2   | 0        | 2.08924   | * |
| 182 | Adenocarcinoma of large intestine | STOX2    | 0        | 2.16469   | * |
| 183 | Adenocarcinoma of large intestine | GCNT2    | 0        | 2.239828  | * |
| 184 | Adenocarcinoma of large intestine | SPIB     | 0        | 2.38534   | * |
| 185 | Adenocarcinoma of large intestine | SRI      | 0        | 2.528823  | * |
| 186 | Adenocarcinoma of large intestine | PAQR5    | 0        | 2.542337  | * |
| 187 | Adenocarcinoma of large intestine | PDE9A    | 0        | 2.559518  | * |
| 188 | Adenocarcinoma of large intestine | PLCE1    | 0        | 2.627492  | * |
| 189 | Adenocarcinoma of large intestine | HIGD1A   | 0        | 2.629734  | * |
| 190 | Adenocarcinoma of large intestine | NR5A2    | 0        | 2.707146  | * |
| 191 | Adenocarcinoma of large intestine | STMN2    | 0        | 2.790942  | * |
| 192 | Adenocarcinoma of large intestine | HTR4     | 0        | 2.796495  | * |
| 193 | Adenocarcinoma of large intestine | ACADS    | 0        | 2.83351   | * |
| 194 | Adenocarcinoma of large intestine | SLC25A34 | 0        | 2.894841  | * |
| 195 | Adenocarcinoma of large intestine | ABI3BP   | 0        | 3.004368  | * |
| 196 | Adenocarcinoma of large intestine | UGDH     | 0        | 3.083284  | * |
| 197 | Adenocarcinoma of large intestine | XKR4     | 0        | 3.097864  | * |
| 198 | Adenocarcinoma of large intestine | SCGN     | 0        | 3.561313  | * |

|     |                                   |          |          |            |   |
|-----|-----------------------------------|----------|----------|------------|---|
| 199 | Adenocarcinoma of large intestine | GPX3     | 0        | 3.748229   | * |
| 200 | Adenocarcinoma of large intestine | TSPAN7   | 0        | 4.352056   | * |
| 201 | Adenocarcinoma of large intestine | SLC16A9  | 0        | 4.611893   | * |
| 202 | Adenocarcinoma of large intestine | CLDN23   | 0        | 4.827579   | * |
| 203 | Adenocarcinoma of large intestine | ADAMDEC1 | 0        | 5.194066   | * |
| 204 | Adenocarcinoma of large intestine | CXCL12   | 0        | 5.943106   | * |
| 205 | Adenocarcinoma of large intestine | SCARA5   | 0        | 6.298371   | * |
| 206 | Adenocarcinoma of large intestine | OSTbeta  | 0        | 6.304743   | * |
| 207 | Adenocarcinoma of large intestine | SFRP1    | 0        | 6.684432   | * |
| 208 | Adenocarcinoma of large intestine | PKIB     | 0        | 6.760776   | * |
| 209 | Adenocarcinoma of large intestine | MAMDC2   | 0        | 7.045446   | * |
| 210 | Adenocarcinoma of large intestine | HSD17B2  | 0        | 7.781235   | * |
| 211 | Adenocarcinoma of large intestine | ADH1A    | 0        | 11.751594  | * |
| 212 | Adenocarcinoma of large intestine | GUCA2B   | 0        | 24.924778  | * |
| 213 | Adenocarcinoma of large intestine | GUCA2A   | 0        | 26.964687  | * |
| 214 | Adenocarcinoma of large intestine | AQP8     | 0        | 44.069335  | * |
| 215 | adenoma                           | SLC26A3  | 0        | -38.08636  | * |
| 216 | adenoma                           | GUCA2A   | 0        | -28.722896 | * |
| 217 | adenoma                           | ABCA8    | 0        | -23.213255 | * |
| 218 | adenoma                           | CLCA4    | 0        | -21.193232 | * |
| 219 | adenoma                           | CA1      | 0        | -18.850535 | * |
| 220 | adenoma                           | CA4      | 0        | -17.421036 | * |
| 221 | adenoma                           | CD177    | 0        | -16.277312 | * |
| 222 | adenoma                           | PCK1     | 0        | -16.18203  | * |
| 223 | adenoma                           | CDKN2B   | 0        | -14.536097 | * |
| 224 | adenoma                           | ADAMDEC1 | 0        | -12.069765 | * |
| 225 | adenoma                           | GCG      | 0.000008 | -11.58098  | * |
| 226 | adenoma                           | CXCL12   | 0        | -11.210708 | * |
| 227 | adenoma                           | EDN3     | 0        | -10.750175 | * |
| 228 | adenoma                           | AQP8     | 0        | -10.15701  | * |
| 229 | adenoma                           | TRPM6    | 0        | -9.613446  | * |
| 230 | adenoma                           | ANK2     | 0        | -9.366054  | * |
| 231 | adenoma                           | TCF21    | 0        | -9.193144  | * |
| 232 | adenoma                           | SLC4A4   | 0        | -9.098508  | * |
| 233 | adenoma                           | NEUROD1  | 0.000008 | -8.968304  | * |
| 234 | adenoma                           | FBLN1    | 0        | -8.162717  | * |
| 235 | adenoma                           | GDPD2    | 0        | -7.595737  | * |
| 236 | adenoma                           | CLDN23   | 0        | -7.499048  | * |
| 237 | adenoma                           | USP2     | 0.000001 | -7.413002  | * |
| 238 | adenoma                           | FXYD1    | 0        | -7.370164  | * |
| 239 | adenoma                           | CHGA     | 0        | -7.303062  | * |
| 240 | adenoma                           | GUCA2B   | 0        | -7.05847   | * |
| 241 | adenoma                           | CA2      | 0        | -6.781211  | * |
| 242 | adenoma                           | SEMA6D   | 0        | -6.121416  | * |
| 243 | adenoma                           | C2orf88  | 0        | -6.019888  | * |
| 244 | adenoma                           | PHLPP2   | 0        | -5.956011  | * |
| 245 | adenoma                           | SCARA5   | 0        | -5.907949  | * |
| 246 | adenoma                           | ANO5     | 0        | -5.903868  | * |
| 247 | adenoma                           | MS4A12   | 0        | -5.885629  | * |
| 248 | adenoma                           | NR5A2    | 0        | -5.628608  | * |



|     |         |           |          |           |   |
|-----|---------|-----------|----------|-----------|---|
| 249 | adenoma | MEIS1     | 0        | -5.618535 | * |
| 250 | adenoma | TSPAN7    | 0        | -5.59846  | * |
| 251 | adenoma | HAPLN1    | 0        | -5.595542 | * |
| 252 | adenoma | TRPC1     | 0        | -5.588125 | * |
| 253 | adenoma | CPNE8     | 0        | -5.539105 | * |
| 254 | adenoma | CP        | 0        | -5.496611 | * |
| 255 | adenoma | ZG16      | 0        | -5.473881 | * |
| 256 | adenoma | EDIL3     | 0        | -5.471718 | * |
| 257 | adenoma | PAPPA     | 0.000031 | -5.221384 | * |
| 258 | adenoma | NR3C1     | 0        | -5.199333 | * |
| 259 | adenoma | C14orf139 | 0        | -5.19712  | * |
| 260 | adenoma | PKIB      | 0        | -5.194257 | * |
| 261 | adenoma | MYLK      | 0        | -5.191709 | * |
| 262 | adenoma | IGF1      | 0        | -5.019269 | * |
| 263 | adenoma | HPGD      | 0        | -4.952038 | * |
| 264 | adenoma | PAG1      | 0        | -4.888206 | * |
| 265 | adenoma | TMEM171   | 0        | -4.881186 | * |
| 266 | adenoma | EPB41L3   | 0        | -4.876504 | * |
| 267 | adenoma | DHRS11    | 0        | -4.865647 | * |
| 268 | adenoma | ITIH5     | 0        | -4.713737 | * |
| 269 | adenoma | LPAR1     | 0        | -4.679545 | * |
| 270 | adenoma | CEACAM7   | 0        | -4.676861 | * |
| 271 | adenoma | SCG2      | 0        | -4.649106 | * |
| 272 | adenoma | NDN       | 0        | -4.581847 | * |
| 273 | adenoma | RUNDC3B   | 0        | -4.530686 | * |
| 274 | adenoma | CNNM2     | 0        | -4.530382 | * |
| 275 | adenoma | SETBP1    | 0        | -4.422574 | * |
| 276 | adenoma | C11orf96  | 0.000082 | -4.344237 | * |
| 277 | adenoma | COLEC12   | 0        | -4.307452 | * |
| 278 | adenoma | TRAF3IP3  | 0.000018 | -4.30323  | * |
| 279 | adenoma | CES2      | 0        | -4.196009 | * |
| 280 | adenoma | KCTD12    | 0        | -4.172007 | * |
| 281 | adenoma | PDE2A     | 0        | -4.168294 | * |
| 282 | adenoma | TMCC3     | 0        | -4.090314 | * |
| 283 | adenoma | GPX3      | 0        | -4.07824  | * |
| 284 | adenoma | RARRES2   | 0.000004 | -3.962436 | * |
| 285 | adenoma | MPEG1     | 0.000003 | -3.942707 | * |
| 286 | adenoma | SPARCL1   | 0        | -3.9365   | * |
| 287 | adenoma | RGMA      | 0        | -3.847742 | * |
| 288 | adenoma | SNAI2     | 0        | -3.844742 | * |
| 289 | adenoma | MALL      | 0        | -3.830649 | * |
| 290 | adenoma | CDH2      | 0        | -3.829926 | * |
| 291 | adenoma | UNC5C     | 0        | -3.802816 | * |
| 292 | adenoma | PPP1R16B  | 0.000004 | -3.797815 | * |
| 293 | adenoma | MGAT4A    | 0        | -3.779783 | * |
| 294 | adenoma | XKR4      | 0.000001 | -3.770258 | * |
| 295 | adenoma | CYP1B1    | 0.000036 | -3.743165 | * |
| 296 | adenoma | AQP1      | 0        | -3.717151 | * |
| 297 | adenoma | ADAMTS1   | 0.000015 | -3.716882 | * |
| 298 | adenoma | IL6R      | 0        | -3.695784 | * |

|     |         |              |          |           |   |
|-----|---------|--------------|----------|-----------|---|
| 299 | adenoma | LOC344887    | 0.000002 | -3.69458  | * |
| 300 | adenoma | GPC6         | 0        | -3.69371  | * |
| 301 | adenoma | DOCK10       | 0        | -3.6903   | * |
| 302 | adenoma | RASGRP3      | 0        | -3.606281 | * |
| 303 | adenoma | ZEB2         | 0        | -3.603844 | * |
| 304 | adenoma | CCL14        | 0        | -3.57784  | * |
| 305 | adenoma | CLIC5        | 0        | -3.536466 | * |
| 306 | adenoma | NAAA         | 0        | -3.52473  | * |
| 307 | adenoma | HIGD1A       | 0        | -3.491594 | * |
| 308 | adenoma | FGL2         | 0        | -3.475052 | * |
| 309 | adenoma | RUNX1T1      | 0        | -3.43287  | * |
| 310 | adenoma | DCN          | 0        | -3.426964 | * |
| 311 | adenoma | AHCYL2       | 0        | -3.42458  | * |
| 312 | adenoma | SMPDL3A      | 0        | -3.413709 | * |
| 313 | adenoma | VCAM1        | 0.000004 | -3.409172 | * |
| 314 | adenoma | FRMD6        | 0        | -3.373895 | * |
| 315 | adenoma | FAM107A      | 0.000004 | -3.324142 | * |
| 316 | adenoma | MAF          | 0        | -3.308581 | * |
| 317 | adenoma | TIMP2        | 0        | -3.292712 | * |
| 318 | adenoma | POSTN        | 0        | -3.273193 | * |
| 319 | adenoma | SEMA6A       | 0        | -3.255544 | * |
| 320 | adenoma | TP53INP2     | 0        | -3.238175 | * |
| 321 | adenoma | RAB37        | 0        | -3.23089  | * |
| 322 | adenoma | CCDC80       | 0        | -3.229232 | * |
| 323 | adenoma | PRKAR2B      | 0        | -3.223903 | * |
| 324 | adenoma | PLAC9        | 0.000002 | -3.223752 | * |
| 325 | adenoma | CMAH         | 0        | -3.208679 | * |
| 326 | adenoma | MS4A7        | 0        | -3.165402 | * |
| 327 | adenoma | RELL1        | 0        | -3.162769 | * |
| 328 | adenoma | RBMS3        | 0        | -3.119037 | * |
| 329 | adenoma | ZCCHC24      | 0        | -3.100495 | * |
| 330 | adenoma | SLC46A3      | 0        | -3.09383  | * |
| 331 | adenoma | PTPRR        | 0.000004 | -3.091864 | * |
| 332 | adenoma | CNRIP1       | 0        | -3.067872 | * |
| 333 | adenoma | PDGFRA       | 0        | -3.06471  | * |
| 334 | adenoma | PLOD2        | 0        | -3.053873 | * |
| 335 | adenoma | GNB4         | 0        | -3.011228 | * |
| 336 | adenoma | GIMAP6       | 0        | -3.01085  | * |
| 337 | adenoma | HDAC9        | 0        | -3.003966 | * |
| 338 | adenoma | CFH          | 0        | -2.998647 | * |
| 339 | adenoma | MCC          | 0        | -2.970271 | * |
| 340 | adenoma | PRDX6        | 0        | -2.956727 | * |
| 341 | adenoma | DDR2         | 0        | -2.955575 | * |
| 342 | adenoma | SLC9A9       | 0        | -2.950103 | * |
| 343 | adenoma | GGTA1        | 0        | -2.9497   | * |
| 344 | adenoma | TTC22        | 0        | -2.946713 | * |
| 345 | adenoma | CACNA2D1     | 0.000001 | -2.935371 | * |
| 346 | adenoma | LOC100506621 | 0.000001 | -2.922869 | * |
| 347 | adenoma | BGN          | 0.000001 | -2.91178  | * |
| 348 | adenoma | ADAP2        | 0.000006 | -2.907607 | * |

|     |         |          |          |           |   |
|-----|---------|----------|----------|-----------|---|
| 349 | adenoma | SLC20A1  | 0.000001 | -2.894122 | * |
| 350 | adenoma | PTGIS    | 0.000001 | -2.890805 | * |
| 351 | adenoma | LIFR     | 0.000027 | -2.862675 | * |
| 352 | adenoma | SGK1     | 0        | -2.849016 | * |
| 353 | adenoma | APOE     | 0.000001 | -2.846108 | * |
| 354 | adenoma | MRC1     | 0        | -2.839779 | * |
| 355 | adenoma | STAB1    | 0        | -2.839099 | * |
| 356 | adenoma | F13A1    | 0.000005 | -2.837147 | * |
| 357 | adenoma | RDX      | 0        | -2.833988 | * |
| 358 | adenoma | TNXA     | 0        | -2.832863 | * |
| 359 | adenoma | CTSZ     | 0.000004 | -2.829326 | * |
| 360 | adenoma | SNAP25   | 0.000026 | -2.820829 | * |
| 361 | adenoma | TCF4     | 0.000003 | -2.812337 | * |
| 362 | adenoma | GNG2     | 0        | -2.792069 | * |
| 363 | adenoma | CD48     | 0.00002  | -2.756235 | * |
| 364 | adenoma | CLCN2    | 0        | -2.755245 | * |
| 365 | adenoma | SYNC     | 0        | -2.707972 | * |
| 366 | adenoma | AKT3     | 0        | -2.686562 | * |
| 367 | adenoma | COL13A1  | 0        | -2.675191 | * |
| 368 | adenoma | ASPN     | 0.00001  | -2.658627 | * |
| 369 | adenoma | GPMB     | 0.000002 | -2.653335 | * |
| 370 | adenoma | SLC30A4  | 0        | -2.646617 | * |
| 371 | adenoma | RGL1     | 0        | -2.64603  | * |
| 372 | adenoma | MEF2C    | 0.000009 | -2.629412 | * |
| 373 | adenoma | C6orf204 | 0        | -2.60794  | * |
| 374 | adenoma | COL28A1  | 0.000001 | -2.595261 | * |
| 375 | adenoma | CYGB     | 0        | -2.574414 | * |
| 376 | adenoma | SSBP2    | 0        | -2.561707 | * |
| 377 | adenoma | MXD1     | 0        | -2.559257 | * |
| 378 | adenoma | FNBP1    | 0        | -2.557199 | * |
| 379 | adenoma | ABCA6    | 0.000001 | -2.55698  | * |
| 380 | adenoma | TIMP3    | 0.000001 | -2.53521  | * |
| 381 | adenoma | GIMAP1   | 0.00001  | -2.527932 | * |
| 382 | adenoma | RAB34    | 0.000001 | -2.511206 | * |
| 383 | adenoma | SDPR     | 0        | -2.501807 | * |
| 384 | adenoma | ANTXR1   | 0        | -2.49782  | * |
| 385 | adenoma | PDLIM3   | 0.000001 | -2.484118 | * |
| 386 | adenoma | LOX      | 0.000005 | -2.460449 | * |
| 387 | adenoma | ITM2C    | 0        | -2.45619  | * |
| 388 | adenoma | SIGLEC1  | 0.000003 | -2.44309  | * |
| 389 | adenoma | CD163    | 0.000005 | -2.433077 | * |
| 390 | adenoma | CYS1     | 0.000004 | -2.42959  | * |
| 391 | adenoma | CSF1R    | 0.000004 | -2.42014  | * |
| 392 | adenoma | GNA11    | 0        | -2.408995 | * |
| 393 | adenoma | ZFPM2    | 0        | -2.389381 | * |
| 394 | adenoma | SLIT2    | 0        | -2.388864 | * |
| 395 | adenoma | BCL2L11  | 0        | -2.372495 | * |
| 396 | adenoma | PTGER3   | 0        | -2.372401 | * |
| 397 | adenoma | CPM      | 0.000022 | -2.370853 | * |
| 398 | adenoma | EVI2B    | 0.000026 | -2.370211 | * |

|     |         |              |          |           |   |
|-----|---------|--------------|----------|-----------|---|
| 399 | adenoma | CD36         | 0        | -2.36807  | * |
| 400 | adenoma | SLC2A13      | 0        | -2.35371  | * |
| 401 | adenoma | OLFML1       | 0        | -2.352103 | * |
| 402 | adenoma | GAS7         | 0        | -2.331612 | * |
| 403 | adenoma | NRP1         | 0.000002 | -2.319185 | * |
| 404 | adenoma | TMEM133      | 0        | -2.318497 | * |
| 405 | adenoma | MYO5A        | 0.000001 | -2.291889 | * |
| 406 | adenoma | AXL          | 0.000021 | -2.290225 | * |
| 407 | adenoma | RCAN1        | 0.000002 | -2.289081 | * |
| 408 | adenoma | GLTP         | 0        | -2.27136  | * |
| 409 | adenoma | ARHGAP15     | 0.000001 | -2.248758 | * |
| 410 | adenoma | ZNF542       | 0.000001 | -2.229413 | * |
| 411 | adenoma | ANKRD6       | 0.000007 | -2.224363 | * |
| 412 | adenoma | JAZF1        | 0.000001 | -2.210426 | * |
| 413 | adenoma | FERMT2       | 0        | -2.20204  | * |
| 414 | adenoma | B3GNT7       | 0.000007 | -2.180997 | * |
| 415 | adenoma | CYLD         | 0        | -2.180294 | * |
| 416 | adenoma | UGP2         | 0        | -2.178624 | * |
| 417 | adenoma | AMOTL1       | 0.000013 | -2.173702 | * |
| 418 | adenoma | ARMCX1       | 0.000001 | -2.17268  | * |
| 419 | adenoma | ARHGAP42     | 0        | -2.119791 | * |
| 420 | adenoma | IGFBP3       | 0        | -2.099543 | * |
| 421 | adenoma | LOC100127983 | 0.000008 | -2.096915 | * |
| 422 | adenoma | CLEC2B       | 0.000009 | -2.096686 | * |
| 423 | adenoma | HLA-DRB1     | 0.000007 | -2.095995 | * |
| 424 | adenoma | 8-Sep        | 0        | -2.09136  | * |
| 425 | adenoma | ARHGEF6      | 0.000013 | -2.079279 | * |
| 426 | adenoma | FAM126A      | 0.000001 | -2.078326 | * |
| 427 | adenoma | TNS1         | 0.000001 | -2.071872 | * |
| 428 | adenoma | C17orf91     | 0.000002 | -2.0713   | * |
| 429 | adenoma | AKAP2        | 0        | -2.069514 | * |
| 430 | adenoma | JAM3         | 0.000002 | -2.051995 | * |
| 431 | adenoma | FXYD6        | 0        | -2.037228 | * |
| 432 | adenoma | COL6A2       | 0        | -2.03661  | * |
| 433 | adenoma | COL3A1       | 0        | -2.027751 | * |
| 434 | adenoma | ZNF304       | 0        | -2.023245 | * |
| 435 | adenoma | FN1          | 0        | -2.022209 | * |
| 436 | adenoma | ECM2         | 0        | -2.01929  | * |
| 437 | adenoma | DKC1         | 0        | 2.10166   | * |
| 438 | adenoma | GPX2         | 0        | 2.225244  | * |
| 439 | adenoma | ITGA6        | 0        | 2.419872  | * |
| 440 | adenoma | BACE2        | 0        | 2.571998  | * |
| 441 | adenoma | FERMT1       | 0        | 2.605975  | * |
| 442 | adenoma | MET          | 0        | 3.407449  | * |
| 443 | adenoma | NEBL         | 0        | 3.427539  | * |
| 444 | adenoma | ANXA3        | 0        | 3.510112  | * |
| 445 | adenoma | ETV4         | 0        | 3.658835  | * |
| 446 | adenoma | RNF43        | 0        | 3.789269  | * |
| 447 | adenoma | ZNRF3        | 0        | 3.957787  | * |
| 448 | adenoma | SORD         | 0        | 3.981631  | * |

|     |              |              |          |           |   |
|-----|--------------|--------------|----------|-----------|---|
| 449 | adenoma      | CD44         | 0        | 4.366169  | * |
| 450 | adenoma      | S100P        | 0        | 4.459644  | * |
| 451 | adenoma      | GALNT6       | 0        | 5.744695  | * |
| 452 | adenoma      | AXIN2        | 0        | 6.490564  | * |
| 453 | beta catenin | KIAA1199     | 0        | -9.475267 | * |
| 454 | beta catenin | PROX1        | 0        | -8.678827 | * |
| 455 | beta catenin | FGF20        | 0        | -7.012846 | * |
| 456 | beta catenin | TNFRSF11B    | 0        | -5.709377 | * |
| 457 | beta catenin | DCLK1        | 0        | -5.445256 | * |
| 458 | beta catenin | C4orf46      | 0        | -4.443408 | * |
| 459 | beta catenin | MYH7B        | 0        | -4.287094 | * |
| 460 | beta catenin | MAP1LC3B     | 0        | -4.269795 | * |
| 461 | beta catenin | HNRNPA0      | 0        | -4.257481 | * |
| 462 | beta catenin | SP5          | 0        | -4.186757 | * |
| 463 | beta catenin | SYK          | 0        | -4.131503 | * |
| 464 | beta catenin | NAA30        | 0        | -4.091132 | * |
| 465 | beta catenin | MAK16        | 0        | -3.859284 | * |
| 466 | beta catenin | PIGW         | 0        | -3.823781 | * |
| 467 | beta catenin | PFKFB2       | 0.000001 | -3.665898 | * |
| 468 | beta catenin | RASA1        | 0        | -3.615429 | * |
| 469 | beta catenin | LEPROTL1     | 0        | -3.588382 | * |
| 470 | beta catenin | PNKD         | 0        | -3.522663 | * |
| 471 | beta catenin | SYNGR3       | 0.000001 | -3.480191 | * |
| 472 | beta catenin | NXT2         | 0        | -3.361643 | * |
| 473 | beta catenin | LOC100288413 | 0        | -3.361643 | * |
| 474 | beta catenin | KIF1B        | 0        | -3.096918 | * |
| 475 | beta catenin | SCRIB        | 0        | -3.08086  | * |
| 476 | beta catenin | MAPK1        | 0        | -2.998346 | * |
| 477 | beta catenin | ASCL2        | 0        | -2.911306 | * |
| 478 | beta catenin | DOCK11       | 0        | -2.904588 | * |
| 479 | beta catenin | YRDC         | 0        | -2.901234 | * |
| 480 | beta catenin | PLEKHA3      | 0        | -2.85304  | * |
| 481 | beta catenin | AIDA         | 0        | -2.83497  | * |
| 482 | beta catenin | PPP1R2       | 0.000001 | -2.828427 | * |
| 483 | beta catenin | NCRNA00118   | 0        | -2.74632  | * |
| 484 | beta catenin | CDK19        | 0        | -2.724201 | * |
| 485 | beta catenin | MARVELD2     | 0        | -2.713209 | * |
| 486 | beta catenin | PLEKHB2      | 0        | -2.655837 | * |
| 487 | beta catenin | TMEM41B      | 0        | -2.620787 | * |
| 488 | beta catenin | SLC38A1      | 0        | -2.596677 | * |
| 489 | beta catenin | NAP1L1       | 0.000001 | -2.549121 | * |
| 490 | beta catenin | TSPAN5       | 0        | -2.543238 | * |
| 491 | beta catenin | DYNC1LI2     | 0        | -2.518387 | * |
| 492 | beta catenin | TOMM22       | 0.000001 | -2.467984 | * |
| 493 | beta catenin | ETS2         | 0.000001 | -2.452353 | * |
| 494 | beta catenin | GIN51        | 0.000001 | -2.42839  | * |
| 495 | beta catenin | RABGAP1      | 0        | -2.413009 | * |
| 496 | beta catenin | PTRH1        | 0        | -2.408831 | * |
| 497 | beta catenin | ATG12        | 0        | -2.399111 | * |
| 498 | beta catenin | FAM105B      | 0        | -2.366082 | * |

|     |              |              |          |           |   |
|-----|--------------|--------------|----------|-----------|---|
| 499 | beta catenin | TM7SF3       | 0        | -2.308038 | * |
| 500 | beta catenin | TTL          | 0        | -2.282846 | * |
| 501 | beta catenin | PLA2G12A     | 0.000001 | -2.269697 | * |
| 502 | beta catenin | CXCL16       | 0        | -2.265768 | * |
| 503 | beta catenin | ANTXR1       | 0        | -2.23845  | * |
| 504 | beta catenin | TNRC6C       | 0        | -2.23845  | * |
| 505 | beta catenin | SAP130       | 0        | -2.186061 | * |
| 506 | beta catenin | VPS41        | 0        | -2.184798 | * |
| 507 | beta catenin | LOC221710    | 0        | -2.149747 | * |
| 508 | beta catenin | SNX12        | 0        | -2.147265 | * |
| 509 | beta catenin | HMGN4        | 0        | -2.136131 | * |
| 510 | beta catenin | UBR7         | 0.000001 | -2.133664 | * |
| 511 | beta catenin | SAP30L       | 0        | -2.132432 | * |
| 512 | beta catenin | KIF5B        | 0        | -2.125055 | * |
| 513 | beta catenin | SNTB1        | 0        | -2.123828 | * |
| 514 | beta catenin | DNAJC19      | 0.000001 | -2.099433 | * |
| 515 | beta catenin | CCNF         | 0.000001 | -2.084932 | * |
| 516 | beta catenin | TSC22D1      | 0        | -2.057416 | * |
| 517 | beta catenin | PRSS3        | 0.000001 | -2.056228 | * |
| 518 | beta catenin | PPP1R14C     | 0        | -2.05504  | * |
| 519 | beta catenin | TMEM127      | 0.000001 | -2.050298 | * |
| 520 | beta catenin | EXOSC2       | 0        | -2.049114 | * |
| 521 | beta catenin | PPP1CC       | 0.000001 | -2.008103 | * |
| 522 | beta catenin | LOC100289410 | 0.000001 | -2.002312 | * |
| 523 | beta catenin | RBMS2        | 0.000001 | 2.001156  | * |
| 524 | beta catenin | GEM          | 0        | 2.010424  | * |
| 525 | beta catenin | GRK5         | 0.000001 | 2.011586  | * |
| 526 | beta catenin | APBB2        | 0.000001 | 2.020903  | * |
| 527 | beta catenin | OLFML2A      | 0        | 2.03261   | * |
| 528 | beta catenin | SH3TC2       | 0.000001 | 2.038489  | * |
| 529 | beta catenin | ARL6IP5      | 0        | 2.044385  | * |
| 530 | beta catenin | PPL          | 0        | 2.045566  | * |
| 531 | beta catenin | CHST6        | 0.000001 | 2.049114  | * |
| 532 | beta catenin | PYCARD       | 0        | 2.051482  | * |
| 533 | beta catenin | UBE2H        | 0        | 2.074121  | * |
| 534 | beta catenin | PQLC3        | 0        | 2.105506  | * |
| 535 | beta catenin | SLC22A4      | 0        | 2.110376  | * |
| 536 | beta catenin | KRT80        | 0        | 2.133664  | * |
| 537 | beta catenin | GLIS2        | 0        | 2.141072  | * |
| 538 | beta catenin | PLA2G16      | 0        | 2.148505  | * |
| 539 | beta catenin | PLD1         | 0        | 2.159704  | * |
| 540 | beta catenin | PRSS23       | 0        | 2.160951  | * |
| 541 | beta catenin | MICAL2       | 0        | 2.168454  | * |
| 542 | beta catenin | C17orf91     | 0        | 2.175982  | * |
| 543 | beta catenin | LOXL4        | 0.000001 | 2.175982  | * |
| 544 | beta catenin | ZNF467       | 0.000001 | 2.201266  | * |
| 545 | beta catenin | NAV1         | 0        | 2.215297  | * |
| 546 | beta catenin | ANKRD46      | 0        | 2.241037  | * |
| 547 | beta catenin | SYTL2        | 0        | 2.247519  | * |
| 548 | beta catenin | GPRC5A       | 0        | 2.257929  | * |

|     |                              |           |          |           |   |
|-----|------------------------------|-----------|----------|-----------|---|
| 549 | beta catenin                 | FNIP2     | 0        | 2.292095  | * |
| 550 | beta catenin                 | CTAGE5    | 0        | 2.337554  | * |
| 551 | beta catenin                 | MAML3     | 0.000001 | 2.348381  | * |
| 552 | beta catenin                 | ASB9      | 0        | 2.390811  | * |
| 553 | beta catenin                 | ZEB1      | 0        | 2.400497  | * |
| 554 | beta catenin                 | CSF2      | 0        | 2.403272  | * |
| 555 | beta catenin                 | FLJ39051  | 0.000001 | 2.414403  | * |
| 556 | beta catenin                 | CD14      | 0        | 2.418591  | * |
| 557 | beta catenin                 | PLAUR     | 0        | 2.436821  | * |
| 558 | beta catenin                 | MGC39372  | 0        | 2.438228  | * |
| 559 | beta catenin                 | ABCC3     | 0        | 2.456606  | * |
| 560 | beta catenin                 | STRADB    | 0        | 2.459446  | * |
| 561 | beta catenin                 | AHNAK2    | 0        | 2.462289  | * |
| 562 | beta catenin                 | SYNPO     | 0.000001 | 2.486587  | * |
| 563 | beta catenin                 | TXNIP     | 0        | 2.522755  | * |
| 564 | beta catenin                 | LIPG      | 0.000001 | 2.587693  | * |
| 565 | beta catenin                 | C10orf116 | 0.000001 | 2.592181  | * |
| 566 | beta catenin                 | LACTB     | 0.000001 | 2.623816  | * |
| 567 | beta catenin                 | FHL1      | 0        | 2.8481    | * |
| 568 | beta catenin                 | ELFN2     | 0.000001 | 2.921414  | * |
| 569 | beta catenin                 | PRICKLE1  | 0        | 2.946836  | * |
| 570 | beta catenin                 | PTGER2    | 0        | 3.068429  | * |
| 571 | beta catenin                 | ZMIZ1     | 0        | 3.123868  | * |
| 572 | beta catenin                 | CLIC3     | 0        | 3.138336  | * |
| 573 | beta catenin                 | ARHGAP42  | 0        | 3.154694  | * |
| 574 | beta catenin                 | CD70      | 0        | 3.330718  | * |
| 575 | beta catenin                 | DENND5B   | 0        | 3.400704  | * |
| 576 | beta catenin                 | FAM20C    | 0        | 3.418429  | * |
| 577 | beta catenin                 | ZCCHC24   | 0        | 3.452162  | * |
| 578 | beta catenin                 | TMEM158   | 0        | 3.54307   | * |
| 579 | beta catenin                 | RASSF4    | 0        | 3.682877  | * |
| 580 | beta catenin                 | TNFSF9    | 0        | 3.695663  | * |
| 581 | beta catenin                 | RTEL1     | 0        | 3.808352  | * |
| 582 | beta catenin                 | IFIT1     | 0        | 3.828201  | * |
| 583 | beta catenin                 | RARRES2   | 0        | 3.899619  | * |
| 584 | beta catenin                 | CFL2      | 0.000001 | 3.899619  | * |
| 585 | beta catenin                 | CREG2     | 0.000001 | 3.917681  | * |
| 586 | beta catenin                 | LOC399959 | 0        | 3.924476  | * |
| 587 | beta catenin                 | KRT86     | 0        | 3.940376  | * |
| 588 | beta catenin                 | TRIM22    | 0        | 4.351964  | * |
| 589 | beta catenin                 | TMEM133   | 0        | 4.356995  | * |
| 590 | beta catenin                 | ATP8A1    | 0        | 4.484664  | * |
| 591 | beta catenin                 | LOC654433 | 0        | 4.642816  | * |
| 592 | beta catenin                 | CNIH3     | 0        | 5.429553  | * |
| 593 | beta catenin                 | LAPTM5    | 0        | 6.607785  | * |
| 594 | beta catenin                 | CCL7      | 0        | 7.559723  | * |
| 595 | beta catenin                 | TIMP3     | 0        | 8.544523  | * |
| 596 | beta catenin                 | SPARC     | 0        | 12.809717 | * |
| 597 | Beta Catenin Staining Method | KIAA1199  | 0        | -9.475267 | * |
| 598 | Beta Catenin Staining Method | PROX1     | 0        | -8.678827 | * |



|     |                              |              |          |           |   |
|-----|------------------------------|--------------|----------|-----------|---|
| 599 | Beta Catenin Staining Method | FGF20        | 0        | -7.012846 | * |
| 600 | Beta Catenin Staining Method | TNFRSF11B    | 0        | -5.709377 | * |
| 601 | Beta Catenin Staining Method | DCLK1        | 0        | -5.445256 | * |
| 602 | Beta Catenin Staining Method | C4orf46      | 0        | -4.443408 | * |
| 603 | Beta Catenin Staining Method | MYH7B        | 0        | -4.287094 | * |
| 604 | Beta Catenin Staining Method | MAP1LC3B     | 0        | -4.269795 | * |
| 605 | Beta Catenin Staining Method | HNRNPA0      | 0        | -4.257481 | * |
| 606 | Beta Catenin Staining Method | SP5          | 0        | -4.186757 | * |
| 607 | Beta Catenin Staining Method | SYK          | 0        | -4.131503 | * |
| 608 | Beta Catenin Staining Method | NAA30        | 0        | -4.091132 | * |
| 609 | Beta Catenin Staining Method | MAK16        | 0        | -3.859284 | * |
| 610 | Beta Catenin Staining Method | PIGW         | 0        | -3.823781 | * |
| 611 | Beta Catenin Staining Method | PFKFB2       | 0.000001 | -3.665898 | * |
| 612 | Beta Catenin Staining Method | RASA1        | 0        | -3.615429 | * |
| 613 | Beta Catenin Staining Method | LEPROTL1     | 0        | -3.588382 | * |
| 614 | Beta Catenin Staining Method | PNKD         | 0        | -3.522663 | * |
| 615 | Beta Catenin Staining Method | SYNGR3       | 0.000001 | -3.480191 | * |
| 616 | Beta Catenin Staining Method | NXT2         | 0        | -3.361643 | * |
| 617 | Beta Catenin Staining Method | LOC100288413 | 0        | -3.361643 | * |
| 618 | Beta Catenin Staining Method | KIF1B        | 0        | -3.096918 | * |
| 619 | Beta Catenin Staining Method | SCRIB        | 0        | -3.08086  | * |
| 620 | Beta Catenin Staining Method | MAPK1        | 0        | -2.998346 | * |
| 621 | Beta Catenin Staining Method | ASCL2        | 0        | -2.911306 | * |
| 622 | Beta Catenin Staining Method | DOCK11       | 0        | -2.904588 | * |
| 623 | Beta Catenin Staining Method | YRDC         | 0        | -2.901234 | * |
| 624 | Beta Catenin Staining Method | PLEKHA3      | 0        | -2.85304  | * |
| 625 | Beta Catenin Staining Method | AIDA         | 0        | -2.83497  | * |
| 626 | Beta Catenin Staining Method | PPP1R2       | 0.000001 | -2.828427 | * |
| 627 | Beta Catenin Staining Method | NCRNA00118   | 0        | -2.74632  | * |
| 628 | Beta Catenin Staining Method | CDK19        | 0        | -2.724201 | * |
| 629 | Beta Catenin Staining Method | MARVELD2     | 0        | -2.713209 | * |
| 630 | Beta Catenin Staining Method | PLEKHB2      | 0        | -2.655837 | * |
| 631 | Beta Catenin Staining Method | TMEM41B      | 0        | -2.620787 | * |
| 632 | Beta Catenin Staining Method | SLC38A1      | 0        | -2.596677 | * |
| 633 | Beta Catenin Staining Method | NAP1L1       | 0.000001 | -2.549121 | * |
| 634 | Beta Catenin Staining Method | TSPAN5       | 0        | -2.543238 | * |
| 635 | Beta Catenin Staining Method | DYNC1L2      | 0        | -2.518387 | * |
| 636 | Beta Catenin Staining Method | TOMM22       | 0.000001 | -2.467984 | * |
| 637 | Beta Catenin Staining Method | ETS2         | 0.000001 | -2.452353 | * |
| 638 | Beta Catenin Staining Method | GINS1        | 0.000001 | -2.42839  | * |
| 639 | Beta Catenin Staining Method | RABGAP1      | 0        | -2.413009 | * |
| 640 | Beta Catenin Staining Method | PTRH1        | 0        | -2.408831 | * |
| 641 | Beta Catenin Staining Method | ATG12        | 0        | -2.399111 | * |
| 642 | Beta Catenin Staining Method | FAM105B      | 0        | -2.366082 | * |
| 643 | Beta Catenin Staining Method | TM7SF3       | 0        | -2.308038 | * |
| 644 | Beta Catenin Staining Method | TTL          | 0        | -2.282846 | * |
| 645 | Beta Catenin Staining Method | PLA2G12A     | 0.000001 | -2.269697 | * |
| 646 | Beta Catenin Staining Method | CXCL16       | 0        | -2.265768 | * |
| 647 | Beta Catenin Staining Method | ANTXR1       | 0        | -2.23845  | * |
| 648 | Beta Catenin Staining Method | TNRC6C       | 0        | -2.23845  | * |



|     |                              |              |          |           |   |
|-----|------------------------------|--------------|----------|-----------|---|
| 649 | Beta Catenin Staining Method | SAP130       | 0        | -2.186061 | * |
| 650 | Beta Catenin Staining Method | VPS41        | 0        | -2.184798 | * |
| 651 | Beta Catenin Staining Method | LOC221710    | 0        | -2.149747 | * |
| 652 | Beta Catenin Staining Method | SNX12        | 0        | -2.147265 | * |
| 653 | Beta Catenin Staining Method | HMG4         | 0        | -2.136131 | * |
| 654 | Beta Catenin Staining Method | UBR7         | 0.000001 | -2.133664 | * |
| 655 | Beta Catenin Staining Method | SAP30L       | 0        | -2.132432 | * |
| 656 | Beta Catenin Staining Method | KIF5B        | 0        | -2.125055 | * |
| 657 | Beta Catenin Staining Method | SNTB1        | 0        | -2.123828 | * |
| 658 | Beta Catenin Staining Method | DNAJC19      | 0.000001 | -2.099433 | * |
| 659 | Beta Catenin Staining Method | CCNF         | 0.000001 | -2.084932 | * |
| 660 | Beta Catenin Staining Method | TSC22D1      | 0        | -2.057416 | * |
| 661 | Beta Catenin Staining Method | PRSS3        | 0.000001 | -2.056228 | * |
| 662 | Beta Catenin Staining Method | PPP1R14C     | 0        | -2.05504  | * |
| 663 | Beta Catenin Staining Method | TMEM127      | 0.000001 | -2.050298 | * |
| 664 | Beta Catenin Staining Method | EXOSC2       | 0        | -2.049114 | * |
| 665 | Beta Catenin Staining Method | PPP1CC       | 0.000001 | -2.008103 | * |
| 666 | Beta Catenin Staining Method | LOC100289410 | 0.000001 | -2.002312 | * |
| 667 | Beta Catenin Staining Method | RBMS2        | 0.000001 | 2.001156  | * |
| 668 | Beta Catenin Staining Method | GEM          | 0        | 2.010424  | * |
| 669 | Beta Catenin Staining Method | GRK5         | 0.000001 | 2.011586  | * |
| 670 | Beta Catenin Staining Method | APBB2        | 0.000001 | 2.020903  | * |
| 671 | Beta Catenin Staining Method | OLFML2A      | 0        | 2.03261   | * |
| 672 | Beta Catenin Staining Method | SH3TC2       | 0.000001 | 2.038489  | * |
| 673 | Beta Catenin Staining Method | ARL6IP5      | 0        | 2.044385  | * |
| 674 | Beta Catenin Staining Method | PPL          | 0        | 2.045566  | * |
| 675 | Beta Catenin Staining Method | CHST6        | 0.000001 | 2.049114  | * |
| 676 | Beta Catenin Staining Method | PYCARD       | 0        | 2.051482  | * |
| 677 | Beta Catenin Staining Method | UBE2H        | 0        | 2.074121  | * |
| 678 | Beta Catenin Staining Method | PQLC3        | 0        | 2.105506  | * |
| 679 | Beta Catenin Staining Method | SLC22A4      | 0        | 2.110376  | * |
| 680 | Beta Catenin Staining Method | KRT80        | 0        | 2.133664  | * |
| 681 | Beta Catenin Staining Method | GLIS2        | 0        | 2.141072  | * |
| 682 | Beta Catenin Staining Method | PLA2G16      | 0        | 2.148505  | * |
| 683 | Beta Catenin Staining Method | PLD1         | 0        | 2.159704  | * |
| 684 | Beta Catenin Staining Method | PRSS23       | 0        | 2.160951  | * |
| 685 | Beta Catenin Staining Method | MICAL2       | 0        | 2.168454  | * |
| 686 | Beta Catenin Staining Method | C17orf91     | 0        | 2.175982  | * |
| 687 | Beta Catenin Staining Method | LOXL4        | 0.000001 | 2.175982  | * |
| 688 | Beta Catenin Staining Method | ZNF467       | 0.000001 | 2.201266  | * |
| 689 | Beta Catenin Staining Method | NAV1         | 0        | 2.215297  | * |
| 690 | Beta Catenin Staining Method | ANKRD46      | 0        | 2.241037  | * |
| 691 | Beta Catenin Staining Method | SYTL2        | 0        | 2.247519  | * |
| 692 | Beta Catenin Staining Method | GPRC5A       | 0        | 2.257929  | * |
| 693 | Beta Catenin Staining Method | FNIP2        | 0        | 2.292095  | * |
| 694 | Beta Catenin Staining Method | CTAGE5       | 0        | 2.337554  | * |
| 695 | Beta Catenin Staining Method | MAML3        | 0.000001 | 2.348381  | * |
| 696 | Beta Catenin Staining Method | ASB9         | 0        | 2.390811  | * |
| 697 | Beta Catenin Staining Method | ZEB1         | 0        | 2.400497  | * |
| 698 | Beta Catenin Staining Method | CSF2         | 0        | 2.403272  | * |

|     |                              |           |          |            |   |
|-----|------------------------------|-----------|----------|------------|---|
| 699 | Beta Catenin Staining Method | FLJ39051  | 0.000001 | 2.414403   | * |
| 700 | Beta Catenin Staining Method | CD14      | 0        | 2.418591   | * |
| 701 | Beta Catenin Staining Method | PLAUR     | 0        | 2.436821   | * |
| 702 | Beta Catenin Staining Method | MGC39372  | 0        | 2.438228   | * |
| 703 | Beta Catenin Staining Method | ABCC3     | 0        | 2.456606   | * |
| 704 | Beta Catenin Staining Method | STRADB    | 0        | 2.459446   | * |
| 705 | Beta Catenin Staining Method | AHNAK2    | 0        | 2.462289   | * |
| 706 | Beta Catenin Staining Method | SYNPO     | 0.000001 | 2.486587   | * |
| 707 | Beta Catenin Staining Method | TXNIP     | 0        | 2.522755   | * |
| 708 | Beta Catenin Staining Method | LIPG      | 0.000001 | 2.587693   | * |
| 709 | Beta Catenin Staining Method | C10orf116 | 0.000001 | 2.592181   | * |
| 710 | Beta Catenin Staining Method | LACTB     | 0.000001 | 2.623816   | * |
| 711 | Beta Catenin Staining Method | FHL1      | 0        | 2.8481     | * |
| 712 | Beta Catenin Staining Method | ELFN2     | 0.000001 | 2.921414   | * |
| 713 | Beta Catenin Staining Method | PRICKLE1  | 0        | 2.946836   | * |
| 714 | Beta Catenin Staining Method | PTGER2    | 0        | 3.068429   | * |
| 715 | Beta Catenin Staining Method | ZMIZ1     | 0        | 3.123868   | * |
| 716 | Beta Catenin Staining Method | CLIC3     | 0        | 3.138336   | * |
| 717 | Beta Catenin Staining Method | ARHGAP42  | 0        | 3.154694   | * |
| 718 | Beta Catenin Staining Method | CD70      | 0        | 3.330718   | * |
| 719 | Beta Catenin Staining Method | DENND5B   | 0        | 3.400704   | * |
| 720 | Beta Catenin Staining Method | FAM20C    | 0        | 3.418429   | * |
| 721 | Beta Catenin Staining Method | ZCCHC24   | 0        | 3.452162   | * |
| 722 | Beta Catenin Staining Method | TMEM158   | 0        | 3.54307    | * |
| 723 | Beta Catenin Staining Method | RASSF4    | 0        | 3.682877   | * |
| 724 | Beta Catenin Staining Method | TNFSF9    | 0        | 3.695663   | * |
| 725 | Beta Catenin Staining Method | RTEL1     | 0        | 3.808352   | * |
| 726 | Beta Catenin Staining Method | IFIT1     | 0        | 3.828201   | * |
| 727 | Beta Catenin Staining Method | RARRES2   | 0        | 3.899619   | * |
| 728 | Beta Catenin Staining Method | CFL2      | 0.000001 | 3.899619   | * |
| 729 | Beta Catenin Staining Method | CREG2     | 0.000001 | 3.917681   | * |
| 730 | Beta Catenin Staining Method | LOC399959 | 0        | 3.924476   | * |
| 731 | Beta Catenin Staining Method | KRT86     | 0        | 3.940376   | * |
| 732 | Beta Catenin Staining Method | TRIM22    | 0        | 4.351964   | * |
| 733 | Beta Catenin Staining Method | TMEM133   | 0        | 4.356995   | * |
| 734 | Beta Catenin Staining Method | ATP8A1    | 0        | 4.484664   | * |
| 735 | Beta Catenin Staining Method | LOC654433 | 0        | 4.642816   | * |
| 736 | Beta Catenin Staining Method | CNIH3     | 0        | 5.429553   | * |
| 737 | Beta Catenin Staining Method | LAPTM5    | 0        | 6.607785   | * |
| 738 | Beta Catenin Staining Method | CCL7      | 0        | 7.559723   | * |
| 739 | Beta Catenin Staining Method | TIMP3     | 0        | 8.544523   | * |
| 740 | Beta Catenin Staining Method | SPARC     | 0        | 12.809717  | * |
| 741 | Cancer of Intestines         | IL1R2     | 0.02893  | -1.828304  | * |
| 742 | Cancer of Intestines         | ACSL5     | 0.031822 | -1.638764  | * |
| 743 | Cancer of Intestines         | ARRDC1    | 0.040085 | -1.527261  | * |
| 744 | Cancer of Intestines         | MMP14     | 0.031822 | -1.500352  | * |
| 745 | Carcinoma                    | SERTAD4   | 0.002393 | -26.609207 | * |
| 746 | Carcinoma                    | FBP1      | 0.000005 | -22.826068 | * |
| 747 | Carcinoma                    | ARSE      | 0.002025 | -12.861074 | * |
| 748 | Carcinoma                    | ERAP2     | 0        | -9.886786  | * |

|     |           |          |          |           |   |
|-----|-----------|----------|----------|-----------|---|
| 749 | Carcinoma | CACNA1D  | 0        | -9.810036 | * |
| 750 | Carcinoma | DAPK1    | 0.000614 | -9.535901 | * |
| 751 | Carcinoma | RARRES1  | 0.010559 | -9.419662 | * |
| 752 | Carcinoma | ZNF702P  | 0.000307 | -8.758415 | * |
| 753 | Carcinoma | HOXA13   | 0.00048  | -8.215634 | * |
| 754 | Carcinoma | ANKRD22  | 0.017211 | -7.7229   | * |
| 755 | Carcinoma | AKR1C1   | 0.000001 | -7.260831 | * |
| 756 | Carcinoma | DHRS9    | 0.000035 | -7.206478 | * |
| 757 | Carcinoma | DEGS2    | 0.000299 | -5.971163 | * |
| 758 | Carcinoma | FOXA1    | 0.006118 | -5.809477 | * |
| 759 | Carcinoma | REPS2    | 0.003467 | -5.700731 | * |
| 760 | Carcinoma | AIM1     | 0.000025 | -5.693764 | * |
| 761 | Carcinoma | NEDD9    | 0.001359 | -5.574342 | * |
| 762 | Carcinoma | CYP1B1   | 0.00005  | -4.808267 | * |
| 763 | Carcinoma | RAB27B   | 0.006599 | -4.788443 | * |
| 764 | Carcinoma | ARSJ     | 0.0003   | -4.71256  | * |
| 765 | Carcinoma | RASEF    | 0.00048  | -4.566345 | * |
| 766 | Carcinoma | EPB41L1  | 0.002224 | -4.503736 | * |
| 767 | Carcinoma | LNK1     | 0.0029   | -4.119568 | * |
| 768 | Carcinoma | HIPK2    | 0.00007  | -4.108589 | * |
| 769 | Carcinoma | LIMCH1   | 0.015341 | -4.042084 | * |
| 770 | Carcinoma | PRSS23   | 0.006367 | -4.011224 | * |
| 771 | Carcinoma | PLCE1    | 0.000049 | -3.826154 | * |
| 772 | Carcinoma | CA12     | 0.011739 | -3.807353 | * |
| 773 | Carcinoma | BARX2    | 0.004206 | -3.6405   | * |
| 774 | Carcinoma | PIK3CD   | 0.000059 | -3.561643 | * |
| 775 | Carcinoma | ATP2C2   | 0.020803 | -3.550565 | * |
| 776 | Carcinoma | NR2F2    | 0.000006 | -3.433272 | * |
| 777 | Carcinoma | GPR160   | 0.00235  | -3.364098 | * |
| 778 | Carcinoma | LAMB1    | 0.002    | -3.170907 | * |
| 779 | Carcinoma | PIK3AP1  | 0.014261 | -3.129655 | * |
| 780 | Carcinoma | ABCC2    | 0.000588 | -3.091683 | * |
| 781 | Carcinoma | MPZL2    | 0.000008 | -3.032397 | * |
| 782 | Carcinoma | GNG4     | 0        | -2.988227 | * |
| 783 | Carcinoma | PBX3     | 0.011198 | -2.953107 | * |
| 784 | Carcinoma | NPNT     | 0.011749 | -2.875041 | * |
| 785 | Carcinoma | SYNE2    | 0.008076 | -2.850088 | * |
| 786 | Carcinoma | BSPRY    | 0.003115 | -2.764997 | * |
| 787 | Carcinoma | MAN2A1   | 0.000057 | -2.752675 | * |
| 788 | Carcinoma | ACSS1    | 0.003523 | -2.672372 | * |
| 789 | Carcinoma | ZNF586   | 0.000003 | -2.663323 | * |
| 790 | Carcinoma | SLC27A2  | 0.00009  | -2.651214 | * |
| 791 | Carcinoma | EEF1A2   | 0.00007  | -2.613331 | * |
| 792 | Carcinoma | GRHL1    | 0.000182 | -2.601681 | * |
| 793 | Carcinoma | STAMBPL1 | 0.006244 | -2.502025 | * |
| 794 | Carcinoma | ARL4C    | 0.000043 | -2.461046 | * |
| 795 | Carcinoma | SYTL2    | 0.003519 | -2.440433 | * |
| 796 | Carcinoma | KIAA1217 | 0.00013  | -2.403687 | * |
| 797 | Carcinoma | EREG     | 0        | -2.395042 | * |
| 798 | Carcinoma | PDS5B    | 0.018761 | -2.371514 | * |

|     |           |           |          |           |   |
|-----|-----------|-----------|----------|-----------|---|
| 799 | Carcinoma | XBP1      | 0.011529 | -2.366994 | * |
| 800 | Carcinoma | EMP2      | 0.000633 | -2.317463 | * |
| 801 | Carcinoma | SERPINB1  | 0.001463 | -2.266946 | * |
| 802 | Carcinoma | RAPH1     | 0.00001  | -2.239885 | * |
| 803 | Carcinoma | RAB11FIP4 | 0.002325 | -2.172103 | * |
| 804 | Carcinoma | QSOX1     | 0.002393 | -2.168546 | * |
| 805 | Carcinoma | ELL3      | 0.00193  | -2.108727 | * |
| 806 | Carcinoma | SLC44A1   | 0.000174 | -2.106095 | * |
| 807 | Carcinoma | INSIG2    | 0.002839 | -2.09161  | * |
| 808 | Carcinoma | DMXL2     | 0.000795 | -2.063702 | * |
| 809 | Carcinoma | PIK3R1    | 0.00118  | -2.043013 | * |
| 810 | Carcinoma | KIAA1370  | 0.012881 | -2.039845 | * |
| 811 | Carcinoma | C7orf44   | 0.009816 | -2.039357 | * |
| 812 | Carcinoma | SIGLEC6   | 0.000067 | -2.024289 | * |
| 813 | Carcinoma | TMEM63A   | 0.013614 | -2.022844 | * |
| 814 | Carcinoma | AACS      | 0.002463 | -2.021075 | * |
| 815 | Carcinoma | FAM129B   | 0.018431 | -2.008576 | * |
| 816 | Carcinoma | OSBPL2    | 0.001874 | -2.000963 | * |
| 817 | Carcinoma | FSCN1     | 0.000056 | 2.003697  | * |
| 818 | Carcinoma | SMTN      | 0.000796 | 2.023584  | * |
| 819 | Carcinoma | TRMT11    | 0.001825 | 2.024834  | * |
| 820 | Carcinoma | SLC4A11   | 0.000001 | 2.054373  | * |
| 821 | Carcinoma | ADPRHL1   | 0.004315 | 2.109918  | * |
| 822 | Carcinoma | DPY19L1   | 0.019895 | 2.154546  | * |
| 823 | Carcinoma | ANUBL1    | 0.012704 | 2.154727  | * |
| 824 | Carcinoma | SLC26A6   | 0.000209 | 2.169796  | * |
| 825 | Carcinoma | COL1A1    | 0.010699 | 2.170064  | * |
| 826 | Carcinoma | KCNH2     | 0.000327 | 2.170806  | * |
| 827 | Carcinoma | TERF2     | 0.000108 | 2.317082  | * |
| 828 | Carcinoma | PCOLCE2   | 0.002315 | 2.320568  | * |
| 829 | Carcinoma | EPM2A     | 0.00542  | 2.36856   | * |
| 830 | Carcinoma | MAPK12    | 0.002018 | 2.415846  | * |
| 831 | Carcinoma | HLA-DMA   | 0.003255 | 2.453573  | * |
| 832 | Carcinoma | GPRIN1    | 0.000188 | 2.520089  | * |
| 833 | Carcinoma | DST       | 0.002839 | 2.577493  | * |
| 834 | Carcinoma | ZNF280C   | 0.000169 | 2.639105  | * |
| 835 | Carcinoma | LMO2      | 0.003088 | 2.727032  | * |
| 836 | Carcinoma | GALNTL4   | 0.002898 | 2.729237  | * |
| 837 | Carcinoma | WASF1     | 0.004814 | 2.804322  | * |
| 838 | Carcinoma | TMEFF1    | 0.010507 | 2.806665  | * |
| 839 | Carcinoma | TUBB3     | 0.000112 | 2.840619  | * |
| 840 | Carcinoma | SDC3      | 0.000336 | 3.082092  | * |
| 841 | Carcinoma | RASAL1    | 0.000162 | 3.090275  | * |
| 842 | Carcinoma | ARHGEF10  | 0.001683 | 3.10512   | * |
| 843 | Carcinoma | RCOR2     | 0.000653 | 3.169315  | * |
| 844 | Carcinoma | SMARCA1   | 0.000189 | 3.232357  | * |
| 845 | Carcinoma | AADAT     | 0.000842 | 3.273583  | * |
| 846 | Carcinoma | ADSSL1    | 0.000648 | 3.275167  | * |
| 847 | Carcinoma | CDKN1C    | 0.000089 | 3.298703  | * |
| 848 | Carcinoma | L3MBTL3   | 0.002877 | 3.366847  | * |

|     |                                  |            |          |            |   |
|-----|----------------------------------|------------|----------|------------|---|
| 849 | Carcinoma                        | CC2D2A     | 0.010947 | 3.518482   | * |
| 850 | Carcinoma                        | C17orf51   | 0.001754 | 3.522841   | * |
| 851 | Carcinoma                        | COL9A3     | 0.001359 | 3.615701   | * |
| 852 | Carcinoma                        | STMN3      | 0.002926 | 3.825362   | * |
| 853 | Carcinoma                        | FGD1       | 0.000414 | 3.826284   | * |
| 854 | Carcinoma                        | CUZD1      | 0.003313 | 3.900527   | * |
| 855 | Carcinoma                        | SNAI1      | 0.001507 | 3.985514   | * |
| 856 | Carcinoma                        | MID1       | 0.003952 | 4.048901   | * |
| 857 | Carcinoma                        | PCLO       | 0.000001 | 4.074492   | * |
| 858 | Carcinoma                        | ZNF350     | 0.000692 | 4.085018   | * |
| 859 | Carcinoma                        | SLC38A5    | 0.000005 | 4.327239   | * |
| 860 | Carcinoma                        | MAP7D3     | 0.000039 | 4.543284   | * |
| 861 | Carcinoma                        | KIAA1324L  | 0.002761 | 4.677679   | * |
| 862 | Carcinoma                        | ZNF512B    | 0.000083 | 5.376174   | * |
| 863 | Carcinoma                        | MSLN       | 0.001306 | 5.394888   | * |
| 864 | Carcinoma                        | FADS1      | 0.000174 | 5.544922   | * |
| 865 | Carcinoma                        | ZNF134     | 0.000012 | 5.94454    | * |
| 866 | Carcinoma                        | FAM101B    | 0.006891 | 6.088541   | * |
| 867 | Carcinoma                        | MAP1B      | 0.001076 | 6.681865   | * |
| 868 | Carcinoma                        | NBEA       | 0.000129 | 6.980152   | * |
| 869 | Carcinoma                        | RRAGD      | 0.002877 | 8.080971   | * |
| 870 | Carcinoma                        | ZNF75A     | 0.000001 | 10.526195  | * |
| 871 | Carcinoma                        | TCEA2      | 0.000204 | 11.266432  | * |
| 872 | Carcinoma                        | C1orf61    | 0.001569 | 18.455713  | * |
| 873 | Carcinoma                        | COL6A1     | 0.000299 | 36.33223   | * |
| 874 | Carcinoma                        | STC2       | 0        | 64.421292  | * |
| 875 | Carcinoma of the Large Intestine | CA1        | 0        | -70.177195 | * |
| 876 | Carcinoma of the Large Intestine | AGR3       | 0.000472 | -58.557365 | * |
| 877 | Carcinoma of the Large Intestine | CLCA1      | 0        | -33.172078 | * |
| 878 | Carcinoma of the Large Intestine | SLC26A3    | 0        | -32.059519 | * |
| 879 | Carcinoma of the Large Intestine | ADH1C      | 0        | -17.399607 | * |
| 880 | Carcinoma of the Large Intestine | GUCA2A     | 0        | -16.294008 | * |
| 881 | Carcinoma of the Large Intestine | CA2        | 0        | -16.253863 | * |
| 882 | Carcinoma of the Large Intestine | FAM55D     | 0        | -15.875662 | * |
| 883 | Carcinoma of the Large Intestine | HEPACAM2   | 0        | -13.446451 | * |
| 884 | Carcinoma of the Large Intestine | MYH11      | 0.000001 | -12.464317 | * |
| 885 | Carcinoma of the Large Intestine | FCGBP      | 0        | -11.435381 | * |
| 886 | Carcinoma of the Large Intestine | IGJ        | 0        | -9.782349  | * |
| 887 | Carcinoma of the Large Intestine | PIGR       | 0.00014  | -8.779625  | * |
| 888 | Carcinoma of the Large Intestine | CA12       | 0.000136 | -5.903099  | * |
| 889 | Carcinoma of the Large Intestine | ST6GALNAC1 | 0        | -4.4897    | * |
| 890 | Carcinoma of the Large Intestine | VSIG2      | 0.000043 | -4.221688  | * |
| 891 | Carcinoma of the Large Intestine | PLA2G10    | 0        | -3.722207  | * |
| 892 | Carcinoma of the Large Intestine | TSPAN1     | 0.000001 | -3.277753  | * |
| 893 | Carcinoma of the Large Intestine | ITM2C      | 0.000001 | -2.872164  | * |
| 894 | Carcinoma of the Large Intestine | C6orf105   | 0.000115 | -2.77523   | * |
| 895 | Carcinoma of the Large Intestine | CAPN9      | 0.000016 | -2.643441  | * |
| 896 | Carcinoma of the Large Intestine | AGR2       | 0.000531 | -2.405779  | * |
| 897 | Carcinoma of the Large Intestine | ABP1       | 0.000179 | -2.385219  | * |
| 898 | Carcinoma of the Large Intestine | MYO1A      | 0.000642 | -2.309044  | * |



|     |                                  |          |          |           |   |
|-----|----------------------------------|----------|----------|-----------|---|
| 899 | Carcinoma of the Large Intestine | BCAS1    | 0.000006 | -2.292699 | * |
| 900 | Carcinoma of the Large Intestine | SCNN1B   | 0.000177 | -2.287546 | * |
| 901 | Carcinoma of the Large Intestine | FAM46C   | 0.000021 | -2.273251 | * |
| 902 | Carcinoma of the Large Intestine | FRZB     | 0.000071 | -2.263728 | * |
| 903 | Carcinoma of the Large Intestine | BTNL3    | 0.000071 | -2.24713  | * |
| 904 | Carcinoma of the Large Intestine | LPAR1    | 0        | -2.101231 | * |
| 905 | Carcinoma of the Large Intestine | LGALS4   | 0.000004 | -2.055385 | * |
| 906 | Carcinoma of the Large Intestine | IL1R2    | 0.02893  | -1.828304 | * |
| 907 | Carcinoma of the Large Intestine | ACSL5    | 0.031822 | -1.638764 | * |
| 908 | Carcinoma of the Large Intestine | ARRDC1   | 0.040085 | -1.527261 | * |
| 909 | Carcinoma of the Large Intestine | ZNF282   | 0        | 2.036182  | * |
| 910 | Carcinoma of the Large Intestine | SET      | 0        | 2.042096  | * |
| 911 | Carcinoma of the Large Intestine | ITIH2    | 0        | 2.398352  | * |
| 912 | Carcinoma of the Large Intestine | LTBP2    | 0        | 2.53017   | * |
| 913 | Carcinoma of the Large Intestine | EEPDI    | 0        | 2.633427  | * |
| 914 | Carcinoma of the Large Intestine | FAM188B  | 0        | 2.650885  | * |
| 915 | Carcinoma of the Large Intestine | C7orf68  | 0.000001 | 2.713761  | * |
| 916 | Carcinoma of the Large Intestine | TOP1MT   | 0        | 2.723722  | * |
| 917 | Carcinoma of the Large Intestine | TCOF1    | 0        | 2.727922  | * |
| 918 | Carcinoma of the Large Intestine | GPR176   | 0        | 2.759087  | * |
| 919 | Carcinoma of the Large Intestine | HABP2    | 0        | 2.896576  | * |
| 920 | Carcinoma of the Large Intestine | GRB10    | 0        | 2.927995  | * |
| 921 | Carcinoma of the Large Intestine | SLC41A1  | 0        | 2.968926  | * |
| 922 | Carcinoma of the Large Intestine | PPEF1    | 0        | 2.974042  | * |
| 923 | Carcinoma of the Large Intestine | SGIP1    | 0        | 3.035792  | * |
| 924 | Carcinoma of the Large Intestine | SOX4     | 0        | 3.075368  | * |
| 925 | Carcinoma of the Large Intestine | GDPD5    | 0        | 3.12273   | * |
| 926 | Carcinoma of the Large Intestine | KIAA1257 | 0        | 3.140853  | * |
| 927 | Carcinoma of the Large Intestine | SEC14L2  | 0        | 3.188415  | * |
| 928 | Carcinoma of the Large Intestine | DNAH5    | 0        | 3.204015  | * |
| 929 | Carcinoma of the Large Intestine | PDE10A   | 0        | 3.215748  | * |
| 930 | Carcinoma of the Large Intestine | MMP14    | 0        | 3.249611  | * |
| 931 | Carcinoma of the Large Intestine | CDKN2A   | 0        | 3.262812  | * |
| 932 | Carcinoma of the Large Intestine | RNF32    | 0        | 3.26672   | * |
| 933 | Carcinoma of the Large Intestine | SLC9A7   | 0        | 3.2869    | * |
| 934 | Carcinoma of the Large Intestine | ITGA11   | 0        | 3.303535  | * |
| 935 | Carcinoma of the Large Intestine | ADAMTS2  | 0        | 3.332996  | * |
| 936 | Carcinoma of the Large Intestine | P4HA3    | 0        | 3.358196  | * |
| 937 | Carcinoma of the Large Intestine | BFSP1    | 0        | 3.394537  | * |
| 938 | Carcinoma of the Large Intestine | LPCAT1   | 0        | 3.398193  | * |
| 939 | Carcinoma of the Large Intestine | TCF7     | 0        | 3.484109  | * |
| 940 | Carcinoma of the Large Intestine | IRAK2    | 0        | 3.526085  | * |
| 941 | Carcinoma of the Large Intestine | ADAMTS6  | 0        | 3.581777  | * |
| 942 | Carcinoma of the Large Intestine | GLS2     | 0        | 3.614199  | * |
| 943 | Carcinoma of the Large Intestine | ALDH3B2  | 0        | 3.771741  | * |
| 944 | Carcinoma of the Large Intestine | HS6ST2   | 0        | 3.806945  | * |
| 945 | Carcinoma of the Large Intestine | TBX20    | 0        | 3.863409  | * |
| 946 | Carcinoma of the Large Intestine | HAPLN3   | 0        | 3.864986  | * |
| 947 | Carcinoma of the Large Intestine | LEPRE1   | 0        | 3.929111  | * |
| 948 | Carcinoma of the Large Intestine | FAM150A  | 0        | 3.955729  | * |

|     |                                  |            |   |           |   |
|-----|----------------------------------|------------|---|-----------|---|
| 949 | Carcinoma of the Large Intestine | CSGALNACT1 | 0 | 3.983069  | * |
| 950 | Carcinoma of the Large Intestine | VWA2       | 0 | 3.985745  | * |
| 951 | Carcinoma of the Large Intestine | LRRC34     | 0 | 4.101056  | * |
| 952 | Carcinoma of the Large Intestine | PJA1       | 0 | 4.103211  | * |
| 953 | Carcinoma of the Large Intestine | GAS2       | 0 | 4.130475  | * |
| 954 | Carcinoma of the Large Intestine | PTP4A3     | 0 | 4.198752  | * |
| 955 | Carcinoma of the Large Intestine | ACSL6      | 0 | 4.21929   | * |
| 956 | Carcinoma of the Large Intestine | C1orf135   | 0 | 4.242459  | * |
| 957 | Carcinoma of the Large Intestine | SNTB1      | 0 | 4.273359  | * |
| 958 | Carcinoma of the Large Intestine | TNFSF11    | 0 | 4.302181  | * |
| 959 | Carcinoma of the Large Intestine | MTHFD1L    | 0 | 4.380449  | * |
| 960 | Carcinoma of the Large Intestine | STC1       | 0 | 4.395318  | * |
| 961 | Carcinoma of the Large Intestine | ODAM       | 0 | 4.447008  | * |
| 962 | Carcinoma of the Large Intestine | WDR66      | 0 | 4.447168  | * |
| 963 | Carcinoma of the Large Intestine | CSF2       | 0 | 4.465932  | * |
| 964 | Carcinoma of the Large Intestine | PAH        | 0 | 4.501848  | * |
| 965 | Carcinoma of the Large Intestine | LOXL2      | 0 | 4.528196  | * |
| 966 | Carcinoma of the Large Intestine | NEK5       | 0 | 4.545746  | * |
| 967 | Carcinoma of the Large Intestine | GRHL1      | 0 | 4.760864  | * |
| 968 | Carcinoma of the Large Intestine | PLAU       | 0 | 4.841344  | * |
| 969 | Carcinoma of the Large Intestine | DIO2       | 0 | 4.877771  | * |
| 970 | Carcinoma of the Large Intestine | HCN1       | 0 | 4.993712  | * |
| 971 | Carcinoma of the Large Intestine | ICOS       | 0 | 5.13095   | * |
| 972 | Carcinoma of the Large Intestine | CYP39A1    | 0 | 5.382667  | * |
| 973 | Carcinoma of the Large Intestine | CDH6       | 0 | 5.400039  | * |
| 974 | Carcinoma of the Large Intestine | GRIN2B     | 0 | 5.605313  | * |
| 975 | Carcinoma of the Large Intestine | PDPN       | 0 | 5.623195  | * |
| 976 | Carcinoma of the Large Intestine | EGFL6      | 0 | 5.80168   | * |
| 977 | Carcinoma of the Large Intestine | ANGPT2     | 0 | 5.811083  | * |
| 978 | Carcinoma of the Large Intestine | ADAMTS12   | 0 | 6.346981  | * |
| 979 | Carcinoma of the Large Intestine | KRT80      | 0 | 6.582092  | * |
| 980 | Carcinoma of the Large Intestine | JUB        | 0 | 6.6753    | * |
| 981 | Carcinoma of the Large Intestine | MFAP2      | 0 | 6.758639  | * |
| 982 | Carcinoma of the Large Intestine | COL11A1    | 0 | 7.090537  | * |
| 983 | Carcinoma of the Large Intestine | SPP1       | 0 | 7.465531  | * |
| 984 | Carcinoma of the Large Intestine | ESM1       | 0 | 7.595544  | * |
| 985 | Carcinoma of the Large Intestine | COL10A1    | 0 | 7.669827  | * |
| 986 | Carcinoma of the Large Intestine | LEMD1      | 0 | 7.698407  | * |
| 987 | Carcinoma of the Large Intestine | INHBA      | 0 | 7.715281  | * |
| 988 | Carcinoma of the Large Intestine | KAL1       | 0 | 8.67666   | * |
| 989 | Carcinoma of the Large Intestine | ADAM12     | 0 | 9.08807   | * |
| 990 | Carcinoma of the Large Intestine | KIAA1199   | 0 | 10.5275   | * |
| 991 | Carcinoma of the Large Intestine | CHI3L1     | 0 | 10.717129 | * |
| 992 | Carcinoma of the Large Intestine | MSX2       | 0 | 11.332886 | * |
| 993 | Carcinoma of the Large Intestine | CDH3       | 0 | 16.214804 | * |
| 994 | Carcinoma of the Large Intestine | FAP        | 0 | 18.387175 | * |
| 995 | Carcinoma of the Large Intestine | MMP7       | 0 | 32.841944 | * |
| 996 | Catenins                         | KIAA1199   | 0 | -9.475267 | * |
| 997 | Catenins                         | PROX1      | 0 | -8.678827 | * |
| 998 | Catenins                         | FGF20      | 0 | -7.012846 | * |

|      |          |              |          |           |   |
|------|----------|--------------|----------|-----------|---|
| 999  | Catenins | TNFRSF11B    | 0        | -5.709377 | * |
| 1000 | Catenins | DCLK1        | 0        | -5.445256 | * |
| 1001 | Catenins | C4orf46      | 0        | -4.443408 | * |
| 1002 | Catenins | MYH7B        | 0        | -4.287094 | * |
| 1003 | Catenins | MAP1LC3B     | 0        | -4.269795 | * |
| 1004 | Catenins | HNRNPA0      | 0        | -4.257481 | * |
| 1005 | Catenins | SP5          | 0        | -4.186757 | * |
| 1006 | Catenins | SYK          | 0        | -4.131503 | * |
| 1007 | Catenins | NAA30        | 0        | -4.091132 | * |
| 1008 | Catenins | MAK16        | 0        | -3.859284 | * |
| 1009 | Catenins | PIGW         | 0        | -3.823781 | * |
| 1010 | Catenins | PFKFB2       | 0.000001 | -3.665898 | * |
| 1011 | Catenins | RASA1        | 0        | -3.615429 | * |
| 1012 | Catenins | LEPROTL1     | 0        | -3.588382 | * |
| 1013 | Catenins | PNKD         | 0        | -3.522663 | * |
| 1014 | Catenins | SYNGR3       | 0.000001 | -3.480191 | * |
| 1015 | Catenins | NXT2         | 0        | -3.361643 | * |
| 1016 | Catenins | LOC100288413 | 0        | -3.361643 | * |
| 1017 | Catenins | KIF1B        | 0        | -3.096918 | * |
| 1018 | Catenins | SCRIB        | 0        | -3.08086  | * |
| 1019 | Catenins | MAPK1        | 0        | -2.998346 | * |
| 1020 | Catenins | ASCL2        | 0        | -2.911306 | * |
| 1021 | Catenins | DOCK11       | 0        | -2.904588 | * |
| 1022 | Catenins | YRDC         | 0        | -2.901234 | * |
| 1023 | Catenins | PLEKHA3      | 0        | -2.85304  | * |
| 1024 | Catenins | AIDA         | 0        | -2.83497  | * |
| 1025 | Catenins | PPP1R2       | 0.000001 | -2.828427 | * |
| 1026 | Catenins | NCRNA00118   | 0        | -2.74632  | * |
| 1027 | Catenins | CDK19        | 0        | -2.724201 | * |
| 1028 | Catenins | MARVELD2     | 0        | -2.713209 | * |
| 1029 | Catenins | PLEKHB2      | 0        | -2.655837 | * |
| 1030 | Catenins | TMEM41B      | 0        | -2.620787 | * |
| 1031 | Catenins | SLC38A1      | 0        | -2.596677 | * |
| 1032 | Catenins | NAP1L1       | 0.000001 | -2.549121 | * |
| 1033 | Catenins | TSPAN5       | 0        | -2.543238 | * |
| 1034 | Catenins | DYNC1LI2     | 0        | -2.518387 | * |
| 1035 | Catenins | TOMM22       | 0.000001 | -2.467984 | * |
| 1036 | Catenins | ETS2         | 0.000001 | -2.452353 | * |
| 1037 | Catenins | GIN51        | 0.000001 | -2.42839  | * |
| 1038 | Catenins | RABGAP1      | 0        | -2.413009 | * |
| 1039 | Catenins | PTRH1        | 0        | -2.408831 | * |
| 1040 | Catenins | ATG12        | 0        | -2.399111 | * |
| 1041 | Catenins | FAM105B      | 0        | -2.366082 | * |
| 1042 | Catenins | TM7SF3       | 0        | -2.308038 | * |
| 1043 | Catenins | TTL          | 0        | -2.282846 | * |
| 1044 | Catenins | PLA2G12A     | 0.000001 | -2.269697 | * |
| 1045 | Catenins | CXCL16       | 0        | -2.265768 | * |
| 1046 | Catenins | ANTXR1       | 0        | -2.23845  | * |
| 1047 | Catenins | TNRC6C       | 0        | -2.23845  | * |
| 1048 | Catenins | SAP130       | 0        | -2.186061 | * |



|      |          |              |          |           |   |
|------|----------|--------------|----------|-----------|---|
| 1049 | Catenins | VPS41        | 0        | -2.184798 | * |
| 1050 | Catenins | LOC221710    | 0        | -2.149747 | * |
| 1051 | Catenins | SNX12        | 0        | -2.147265 | * |
| 1052 | Catenins | HMGN4        | 0        | -2.136131 | * |
| 1053 | Catenins | UBR7         | 0.000001 | -2.133664 | * |
| 1054 | Catenins | SAP30L       | 0        | -2.132432 | * |
| 1055 | Catenins | KIF5B        | 0        | -2.125055 | * |
| 1056 | Catenins | SNTB1        | 0        | -2.123828 | * |
| 1057 | Catenins | DNAJC19      | 0.000001 | -2.099433 | * |
| 1058 | Catenins | CCNF         | 0.000001 | -2.084932 | * |
| 1059 | Catenins | TSC22D1      | 0        | -2.057416 | * |
| 1060 | Catenins | PRSS3        | 0.000001 | -2.056228 | * |
| 1061 | Catenins | PPP1R14C     | 0        | -2.05504  | * |
| 1062 | Catenins | TMEM127      | 0.000001 | -2.050298 | * |
| 1063 | Catenins | EXOSC2       | 0        | -2.049114 | * |
| 1064 | Catenins | PPP1CC       | 0.000001 | -2.008103 | * |
| 1065 | Catenins | LOC100289410 | 0.000001 | -2.002312 | * |
| 1066 | Catenins | RBMS2        | 0.000001 | 2.001156  | * |
| 1067 | Catenins | GEM          | 0        | 2.010424  | * |
| 1068 | Catenins | GRK5         | 0.000001 | 2.011586  | * |
| 1069 | Catenins | APBB2        | 0.000001 | 2.020903  | * |
| 1070 | Catenins | OLFML2A      | 0        | 2.03261   | * |
| 1071 | Catenins | SH3TC2       | 0.000001 | 2.038489  | * |
| 1072 | Catenins | ARL6IP5      | 0        | 2.044385  | * |
| 1073 | Catenins | PPL          | 0        | 2.045566  | * |
| 1074 | Catenins | CHST6        | 0.000001 | 2.049114  | * |
| 1075 | Catenins | PYCARD       | 0        | 2.051482  | * |
| 1076 | Catenins | UBE2H        | 0        | 2.074121  | * |
| 1077 | Catenins | PQLC3        | 0        | 2.105506  | * |
| 1078 | Catenins | SLC22A4      | 0        | 2.110376  | * |
| 1079 | Catenins | KRT80        | 0        | 2.133664  | * |
| 1080 | Catenins | GLIS2        | 0        | 2.141072  | * |
| 1081 | Catenins | PLA2G16      | 0        | 2.148505  | * |
| 1082 | Catenins | PLD1         | 0        | 2.159704  | * |
| 1083 | Catenins | PRSS23       | 0        | 2.160951  | * |
| 1084 | Catenins | MICAL2       | 0        | 2.168454  | * |
| 1085 | Catenins | C17orf91     | 0        | 2.175982  | * |
| 1086 | Catenins | LOXL4        | 0.000001 | 2.175982  | * |
| 1087 | Catenins | ZNF467       | 0.000001 | 2.201266  | * |
| 1088 | Catenins | NAV1         | 0        | 2.215297  | * |
| 1089 | Catenins | ANKRD46      | 0        | 2.241037  | * |
| 1090 | Catenins | SYTL2        | 0        | 2.247519  | * |
| 1091 | Catenins | GPRC5A       | 0        | 2.257929  | * |
| 1092 | Catenins | FNIP2        | 0        | 2.292095  | * |
| 1093 | Catenins | CTAGE5       | 0        | 2.337554  | * |
| 1094 | Catenins | MAML3        | 0.000001 | 2.348381  | * |
| 1095 | Catenins | ASB9         | 0        | 2.390811  | * |
| 1096 | Catenins | ZEB1         | 0        | 2.400497  | * |
| 1097 | Catenins | CSF2         | 0        | 2.403272  | * |
| 1098 | Catenins | FLJ39051     | 0.000001 | 2.414403  | * |

|      |                 |           |          |            |   |
|------|-----------------|-----------|----------|------------|---|
| 1099 | Catenins        | CD14      | 0        | 2.418591   | * |
| 1100 | Catenins        | PLAUR     | 0        | 2.436821   | * |
| 1101 | Catenins        | MGC39372  | 0        | 2.438228   | * |
| 1102 | Catenins        | ABCC3     | 0        | 2.456606   | * |
| 1103 | Catenins        | STRADB    | 0        | 2.459446   | * |
| 1104 | Catenins        | AHNAK2    | 0        | 2.462289   | * |
| 1105 | Catenins        | SYNPO     | 0.000001 | 2.486587   | * |
| 1106 | Catenins        | TXNIP     | 0        | 2.522755   | * |
| 1107 | Catenins        | LIPG      | 0.000001 | 2.587693   | * |
| 1108 | Catenins        | C10orf116 | 0.000001 | 2.592181   | * |
| 1109 | Catenins        | LACTB     | 0.000001 | 2.623816   | * |
| 1110 | Catenins        | FHL1      | 0        | 2.8481     | * |
| 1111 | Catenins        | ELFN2     | 0.000001 | 2.921414   | * |
| 1112 | Catenins        | PRICKLE1  | 0        | 2.946836   | * |
| 1113 | Catenins        | PTGER2    | 0        | 3.068429   | * |
| 1114 | Catenins        | ZMIZ1     | 0        | 3.123868   | * |
| 1115 | Catenins        | CLIC3     | 0        | 3.138336   | * |
| 1116 | Catenins        | ARHGAP42  | 0        | 3.154694   | * |
| 1117 | Catenins        | CD70      | 0        | 3.330718   | * |
| 1118 | Catenins        | DENND5B   | 0        | 3.400704   | * |
| 1119 | Catenins        | FAM20C    | 0        | 3.418429   | * |
| 1120 | Catenins        | ZCCHC24   | 0        | 3.452162   | * |
| 1121 | Catenins        | TMEM158   | 0        | 3.54307    | * |
| 1122 | Catenins        | RASSF4    | 0        | 3.682877   | * |
| 1123 | Catenins        | TNFSF9    | 0        | 3.695663   | * |
| 1124 | Catenins        | RTEL1     | 0        | 3.808352   | * |
| 1125 | Catenins        | IFIT1     | 0        | 3.828201   | * |
| 1126 | Catenins        | RARRES2   | 0        | 3.899619   | * |
| 1127 | Catenins        | CFL2      | 0.000001 | 3.899619   | * |
| 1128 | Catenins        | CREG2     | 0.000001 | 3.917681   | * |
| 1129 | Catenins        | LOC399959 | 0        | 3.924476   | * |
| 1130 | Catenins        | KRT86     | 0        | 3.940376   | * |
| 1131 | Catenins        | TRIM22    | 0        | 4.351964   | * |
| 1132 | Catenins        | TMEM133   | 0        | 4.356995   | * |
| 1133 | Catenins        | ATP8A1    | 0        | 4.484664   | * |
| 1134 | Catenins        | LOC654433 | 0        | 4.642816   | * |
| 1135 | Catenins        | CNIH3     | 0        | 5.429553   | * |
| 1136 | Catenins        | LAPTM5    | 0        | 6.607785   | * |
| 1137 | Catenins        | CCL7      | 0        | 7.559723   | * |
| 1138 | Catenins        | TIMP3     | 0        | 8.544523   | * |
| 1139 | Catenins        | SPARC     | 0        | 12.809717  | * |
| 1140 | Colon Carcinoma | BCAS1     | 0.004661 | -17.453571 | * |
| 1141 | Colon Carcinoma | AKAP5     | 0.000543 | -7.672727  | * |
| 1142 | Colon Carcinoma | SLC16A9   | 0.00274  | -4.44136   | * |
| 1143 | Colon Carcinoma | TP53I3    | 0.003331 | -2.596453  | * |
| 1144 | Colon Carcinoma | FANCE     | 0.005681 | 2.118416   | * |
| 1145 | Colon Carcinoma | REXO2     | 0.005681 | 2.160419   | * |
| 1146 | Colon Carcinoma | ZNF526    | 0.005925 | 2.162342   | * |
| 1147 | Colon Carcinoma | RHEBL1    | 0.005681 | 2.261905   | * |
| 1148 | Colon Carcinoma | RPS19BP1  | 0.003331 | 2.26466    | * |

|      |                 |          |          |          |   |
|------|-----------------|----------|----------|----------|---|
| 1149 | Colon Carcinoma | AARSD1   | 0.00613  | 2.270759 | * |
| 1150 | Colon Carcinoma | ODF2     | 0.005925 | 2.309888 | * |
| 1151 | Colon Carcinoma | DVL2     | 0.004792 | 2.341063 | * |
| 1152 | Colon Carcinoma | MED20    | 0.005681 | 2.355722 | * |
| 1153 | Colon Carcinoma | SEH1L    | 0.004518 | 2.360705 | * |
| 1154 | Colon Carcinoma | VDAC3    | 0.004518 | 2.387827 | * |
| 1155 | Colon Carcinoma | CASC3    | 0.005681 | 2.403027 | * |
| 1156 | Colon Carcinoma | TMEM99   | 0.004518 | 2.45     | * |
| 1157 | Colon Carcinoma | DHX57    | 0.004792 | 2.473856 | * |
| 1158 | Colon Carcinoma | LIPE     | 0.006116 | 2.478632 | * |
| 1159 | Colon Carcinoma | DDX55    | 0.004661 | 2.49934  | * |
| 1160 | Colon Carcinoma | UBQLN1   | 0.004661 | 2.508627 | * |
| 1161 | Colon Carcinoma | AP2M1    | 0.004792 | 2.519507 | * |
| 1162 | Colon Carcinoma | INTS5    | 0.004661 | 2.532124 | * |
| 1163 | Colon Carcinoma | DHX30    | 0.003998 | 2.555366 | * |
| 1164 | Colon Carcinoma | SNRNP48  | 0.004094 | 2.563389 | * |
| 1165 | Colon Carcinoma | GSK3A    | 0.00274  | 2.598728 | * |
| 1166 | Colon Carcinoma | BAT1     | 0.004146 | 2.612366 | * |
| 1167 | Colon Carcinoma | DIABLO   | 0.004661 | 2.621987 | * |
| 1168 | Colon Carcinoma | WSB2     | 0.004392 | 2.622514 | * |
| 1169 | Colon Carcinoma | SLC25A15 | 0.005681 | 2.654579 | * |
| 1170 | Colon Carcinoma | POLDIP2  | 0.003716 | 2.671356 | * |
| 1171 | Colon Carcinoma | ADSL     | 0.005568 | 2.705135 | * |
| 1172 | Colon Carcinoma | ZNF74    | 0.004146 | 2.735369 | * |
| 1173 | Colon Carcinoma | TFAP4    | 0.005681 | 2.735507 | * |
| 1174 | Colon Carcinoma | FAM136A  | 0.005777 | 2.752235 | * |
| 1175 | Colon Carcinoma | MLF2     | 0.000543 | 2.764901 | * |
| 1176 | Colon Carcinoma | DDX54    | 0.003115 | 2.767251 | * |
| 1177 | Colon Carcinoma | MEN1     | 0.005391 | 2.787758 | * |
| 1178 | Colon Carcinoma | ZW10     | 0.004351 | 2.787995 | * |
| 1179 | Colon Carcinoma | RNH1     | 0.004792 | 2.804233 | * |
| 1180 | Colon Carcinoma | TMEM222  | 0.004146 | 2.815126 | * |
| 1181 | Colon Carcinoma | TMEM43   | 0.005925 | 2.829317 | * |
| 1182 | Colon Carcinoma | AP3M1    | 0.004518 | 2.900102 | * |
| 1183 | Colon Carcinoma | DCPS     | 0.005681 | 2.902001 | * |
| 1184 | Colon Carcinoma | PDIA6    | 0.004518 | 2.90568  | * |
| 1185 | Colon Carcinoma | MRPL37   | 0.003331 | 2.913286 | * |
| 1186 | Colon Carcinoma | TRAPPC4  | 0.004101 | 2.913919 | * |
| 1187 | Colon Carcinoma | EDEM2    | 0.00581  | 2.927928 | * |
| 1188 | Colon Carcinoma | VPS4A    | 0.005681 | 2.938373 | * |
| 1189 | Colon Carcinoma | ALG3     | 0.005978 | 2.939251 | * |
| 1190 | Colon Carcinoma | FAM134C  | 0.005681 | 2.947311 | * |
| 1191 | Colon Carcinoma | NUMBL    | 0.004222 | 2.960859 | * |
| 1192 | Colon Carcinoma | TMEM39B  | 0.004518 | 2.961722 | * |
| 1193 | Colon Carcinoma | SHMT2    | 0.001709 | 2.980376 | * |
| 1194 | Colon Carcinoma | PAFAH1B2 | 0.004661 | 2.988591 | * |
| 1195 | Colon Carcinoma | STT3A    | 0.00531  | 2.993854 | * |
| 1196 | Colon Carcinoma | SLC25A39 | 0.002827 | 3.001813 | * |
| 1197 | Colon Carcinoma | GNS      | 0.004518 | 3.015521 | * |
| 1198 | Colon Carcinoma | EXTL2    | 0.004146 | 3.033154 | * |

|      |                 |         |          |          |   |
|------|-----------------|---------|----------|----------|---|
| 1199 | Colon Carcinoma | M6PR    | 0.005681 | 3.035629 | * |
| 1200 | Colon Carcinoma | DDB1    | 0.004146 | 3.057781 | * |
| 1201 | Colon Carcinoma | PSMF1   | 0.005681 | 3.094299 | * |
| 1202 | Colon Carcinoma | RHOT1   | 0.005681 | 3.134272 | * |
| 1203 | Colon Carcinoma | BUB3    | 0.004183 | 3.142091 | * |
| 1204 | Colon Carcinoma | DDX50   | 0.002827 | 3.14262  | * |
| 1205 | Colon Carcinoma | ZRANB1  | 0.005681 | 3.146275 | * |
| 1206 | Colon Carcinoma | NOP56   | 0.00613  | 3.148926 | * |
| 1207 | Colon Carcinoma | PWP2    | 0.004792 | 3.149072 | * |
| 1208 | Colon Carcinoma | PHF20   | 0.006116 | 3.164103 | * |
| 1209 | Colon Carcinoma | CPSF4   | 0.004078 | 3.175705 | * |
| 1210 | Colon Carcinoma | NANP    | 0.004255 | 3.185112 | * |
| 1211 | Colon Carcinoma | RPUSD4  | 0.00274  | 3.207434 | * |
| 1212 | Colon Carcinoma | AACS    | 0.005142 | 3.239776 | * |
| 1213 | Colon Carcinoma | COPS7A  | 0.00274  | 3.259742 | * |
| 1214 | Colon Carcinoma | GANAB   | 0.00274  | 3.283045 | * |
| 1215 | Colon Carcinoma | KATNB1  | 0.005681 | 3.285481 | * |
| 1216 | Colon Carcinoma | OSBPL10 | 0.004146 | 3.287311 | * |
| 1217 | Colon Carcinoma | RUVBL2  | 0.006112 | 3.290995 | * |
| 1218 | Colon Carcinoma | SSRP1   | 0.004661 | 3.296498 | * |
| 1219 | Colon Carcinoma | SRPR    | 0.005681 | 3.296962 | * |
| 1220 | Colon Carcinoma | GMPS    | 0.004518 | 3.311997 | * |
| 1221 | Colon Carcinoma | FIBP    | 0.002702 | 3.321244 | * |
| 1222 | Colon Carcinoma | NOC4L   | 0.003716 | 3.340548 | * |
| 1223 | Colon Carcinoma | RCC2    | 0.005681 | 3.350207 | * |
| 1224 | Colon Carcinoma | RPN2    | 0.00274  | 3.377154 | * |
| 1225 | Colon Carcinoma | PA2G4   | 0.00274  | 3.385057 | * |
| 1226 | Colon Carcinoma | NOP14   | 0.004661 | 3.39778  | * |
| 1227 | Colon Carcinoma | KPNB1   | 0.004792 | 3.418362 | * |
| 1228 | Colon Carcinoma | PPP2CA  | 0.005558 | 3.478573 | * |
| 1229 | Colon Carcinoma | EZH2    | 0.005681 | 3.483052 | * |
| 1230 | Colon Carcinoma | LASS2   | 0.00613  | 3.511735 | * |
| 1231 | Colon Carcinoma | NAT10   | 0.004518 | 3.51483  | * |
| 1232 | Colon Carcinoma | NEU3    | 0.005925 | 3.553583 | * |
| 1233 | Colon Carcinoma | SYNGAP1 | 0.0052   | 3.554779 | * |
| 1234 | Colon Carcinoma | ENO1    | 0.00274  | 3.587509 | * |
| 1235 | Colon Carcinoma | SF3B3   | 0.005501 | 3.613169 | * |
| 1236 | Colon Carcinoma | DPF2    | 0.005681 | 3.620165 | * |
| 1237 | Colon Carcinoma | HIAT1   | 0.005479 | 3.620712 | * |
| 1238 | Colon Carcinoma | TRIM28  | 0.004518 | 3.638133 | * |
| 1239 | Colon Carcinoma | PRMT5   | 0.003998 | 3.657105 | * |
| 1240 | Colon Carcinoma | G6PD    | 0.00274  | 3.692506 | * |
| 1241 | Colon Carcinoma | USP5    | 0.003716 | 3.700412 | * |
| 1242 | Colon Carcinoma | CSDA    | 0.005077 | 3.70852  | * |
| 1243 | Colon Carcinoma | ARMC6   | 0.004518 | 3.744797 | * |
| 1244 | Colon Carcinoma | RAN     | 0.006116 | 3.745088 | * |
| 1245 | Colon Carcinoma | LUZP6   | 0.004518 | 3.782718 | * |
| 1246 | Colon Carcinoma | VARS    | 0.00184  | 3.789916 | * |
| 1247 | Colon Carcinoma | PREB    | 0.004956 | 3.832184 | * |
| 1248 | Colon Carcinoma | RUVBL1  | 0.005681 | 3.875942 | * |

|      |                 |          |          |           |   |
|------|-----------------|----------|----------|-----------|---|
| 1249 | Colon Carcinoma | TCF7     | 0.004146 | 3.880342  | * |
| 1250 | Colon Carcinoma | PHF16    | 0.00274  | 3.915459  | * |
| 1251 | Colon Carcinoma | NMT1     | 0.005681 | 3.920484  | * |
| 1252 | Colon Carcinoma | POLD2    | 0.005681 | 3.983102  | * |
| 1253 | Colon Carcinoma | KLHL11   | 0.004146 | 4.02168   | * |
| 1254 | Colon Carcinoma | ESYT1    | 0.004518 | 4.039931  | * |
| 1255 | Colon Carcinoma | TEAD4    | 0.005681 | 4.044044  | * |
| 1256 | Colon Carcinoma | TXNDC5   | 0.003331 | 4.108174  | * |
| 1257 | Colon Carcinoma | GART     | 0.004661 | 4.111965  | * |
| 1258 | Colon Carcinoma | UNC119B  | 0.005142 | 4.129353  | * |
| 1259 | Colon Carcinoma | IPO5     | 0.000543 | 4.148212  | * |
| 1260 | Colon Carcinoma | SMYD5    | 0.005205 | 4.192783  | * |
| 1261 | Colon Carcinoma | EFTUD2   | 0.004518 | 4.19284   | * |
| 1262 | Colon Carcinoma | NT5C3L   | 0.004078 | 4.209745  | * |
| 1263 | Colon Carcinoma | NSUN5    | 0.00274  | 4.223239  | * |
| 1264 | Colon Carcinoma | GPN3     | 0.005925 | 4.245142  | * |
| 1265 | Colon Carcinoma | OGFOD1   | 0.002827 | 4.274142  | * |
| 1266 | Colon Carcinoma | ZNF473   | 0.000543 | 4.320616  | * |
| 1267 | Colon Carcinoma | KLC2     | 0.005799 | 4.347443  | * |
| 1268 | Colon Carcinoma | MORN4    | 0.004078 | 4.44856   | * |
| 1269 | Colon Carcinoma | COQ10A   | 0.00274  | 4.468316  | * |
| 1270 | Colon Carcinoma | NONO     | 0.002827 | 4.4933    | * |
| 1271 | Colon Carcinoma | TOMM34   | 0.004392 | 4.503749  | * |
| 1272 | Colon Carcinoma | NOC3L    | 0.005681 | 4.69697   | * |
| 1273 | Colon Carcinoma | FTSJ1    | 0.004078 | 4.767414  | * |
| 1274 | Colon Carcinoma | TPD52L2  | 0.004078 | 4.788684  | * |
| 1275 | Colon Carcinoma | LDHB     | 0.002827 | 4.81117   | * |
| 1276 | Colon Carcinoma | DTD1     | 0.005681 | 4.857716  | * |
| 1277 | Colon Carcinoma | XPO5     | 0.00184  | 4.886191  | * |
| 1278 | Colon Carcinoma | G6PC3    | 0.00274  | 4.886922  | * |
| 1279 | Colon Carcinoma | WDR74    | 0.004146 | 5.075321  | * |
| 1280 | Colon Carcinoma | AHCY     | 0.004518 | 5.223647  | * |
| 1281 | Colon Carcinoma | TEX10    | 0.00274  | 5.426288  | * |
| 1282 | Colon Carcinoma | CIRH1A   | 0.00274  | 5.542027  | * |
| 1283 | Colon Carcinoma | TSPYL2   | 0.00274  | 5.747126  | * |
| 1284 | Colon Carcinoma | TMEM185B | 0.003716 | 5.837496  | * |
| 1285 | Colon Carcinoma | CDK4     | 0.004518 | 6.24989   | * |
| 1286 | Colon Carcinoma | HSPA13   | 0.005681 | 6.341991  | * |
| 1287 | Colon Carcinoma | YARS     | 0.00274  | 6.348424  | * |
| 1288 | Colon Carcinoma | DPP7     | 0.006116 | 6.682502  | * |
| 1289 | Colon Carcinoma | SIM2     | 0.0052   | 7.317708  | * |
| 1290 | Colon Carcinoma | GRPEL2   | 0.004661 | 7.668546  | * |
| 1291 | Colon Carcinoma | MTHFD2   | 0.004146 | 8.186467  | * |
| 1292 | Colon Carcinoma | CD81     | 0.004661 | 8.248565  | * |
| 1293 | Colon Carcinoma | ASNS     | 0.005077 | 9.20214   | * |
| 1294 | Colon Carcinoma | ACCN2    | 0.004094 | 10.236928 | * |
| 1295 | Colon Carcinoma | GRB10    | 0.003716 | 10.421296 | * |
| 1296 | Colon Carcinoma | LDLRAD3  | 0.00613  | 11.487923 | * |
| 1297 | Colon Carcinoma | FOXQ1    | 0.00581  | 11.687135 | * |
| 1298 | Colon Carcinoma | SLC39A6  | 0.006116 | 11.756536 | * |

|      |                   |          |          |            |   |
|------|-------------------|----------|----------|------------|---|
| 1299 | Colon Carcinoma   | SLC3A2   | 0.004792 | 14.29764   | * |
| 1300 | Colon Carcinoma   | PITX1    | 0.004952 | 22.45      | * |
| 1301 | Colon Carcinoma   | HS6ST2   | 0.004518 | 24.301075  | * |
| 1302 | Colon Carcinoma   | FXYD5    | 0.004698 | 64.324786  | * |
| 1303 | Colonic Neoplasms | COL1A1   | 0        | -58.559107 | * |
| 1304 | Colonic Neoplasms | IGHG1    | 0        | -15.238681 | * |
| 1305 | Colonic Neoplasms | CA2      | 0.000006 | -9.288727  | * |
| 1306 | Colonic Neoplasms | CXCL12   | 0        | -8.439793  | * |
| 1307 | Colonic Neoplasms | SLC4A4   | 0        | -7.982638  | * |
| 1308 | Colonic Neoplasms | AKR1B10  | 0        | -6.975418  | * |
| 1309 | Colonic Neoplasms | ADH1C    | 0        | -6.643184  | * |
| 1310 | Colonic Neoplasms | CEACAM7  | 0.000003 | -6.587967  | * |
| 1311 | Colonic Neoplasms | PLA2G10  | 0        | -6.113778  | * |
| 1312 | Colonic Neoplasms | MT1M     | 0        | -5.911706  | * |
| 1313 | Colonic Neoplasms | ABCA8    | 0        | -5.605008  | * |
| 1314 | Colonic Neoplasms | IGHA1    | 0        | -5.251841  | * |
| 1315 | Colonic Neoplasms | CKB      | 0        | -4.979591  | * |
| 1316 | Colonic Neoplasms | DES      | 0        | -4.751915  | * |
| 1317 | Colonic Neoplasms | KRT24    | 0        | -4.737791  | * |
| 1318 | Colonic Neoplasms | MGC13057 | 0        | -4.559318  | * |
| 1319 | Colonic Neoplasms | MAOB     | 0        | -4.38741   | * |
| 1320 | Colonic Neoplasms | TNS1     | 0        | -4.345642  | * |
| 1321 | Colonic Neoplasms | LDHD     | 0        | -3.865801  | * |
| 1322 | Colonic Neoplasms | SMPDL3A  | 0.000003 | -3.486516  | * |
| 1323 | Colonic Neoplasms | C7       | 0        | -3.336013  | * |
| 1324 | Colonic Neoplasms | PDCD4    | 0        | -3.025533  | * |
| 1325 | Colonic Neoplasms | ITM2C    | 0        | -3.013275  | * |
| 1326 | Colonic Neoplasms | SELENBP1 | 0        | -2.780562  | * |
| 1327 | Colonic Neoplasms | KLF9     | 0        | -2.712093  | * |
| 1328 | Colonic Neoplasms | MGLL     | 0        | -2.547536  | * |
| 1329 | Colonic Neoplasms | CCL15    | 0        | -2.514962  | * |
| 1330 | Colonic Neoplasms | MYL9     | 0        | -2.274491  | * |
| 1331 | Colonic Neoplasms | GPX3     | 0        | -2.082077  | * |
| 1332 | Colonic Neoplasms | EPHB2    | 0        | 2.414518   | * |
| 1333 | Colonic Neoplasms | ANXA3    | 0        | 2.482915   | * |
| 1334 | Colonic Neoplasms | CXCL3    | 0        | 5.969079   | * |
| 1335 | Colonic Neoplasms | CXCL1    | 0        | 6.760238   | * |
| 1336 | Colorectal Cancer | CA1      | 0        | -70.177195 | * |
| 1337 | Colorectal Cancer | AGR3     | 0.000472 | -58.557365 | * |
| 1338 | Colorectal Cancer | CLCA1    | 0        | -33.172078 | * |
| 1339 | Colorectal Cancer | SLC26A3  | 0        | -32.059519 | * |
| 1340 | Colorectal Cancer | ADH1C    | 0        | -17.399607 | * |
| 1341 | Colorectal Cancer | GUCA2A   | 0        | -16.294008 | * |
| 1342 | Colorectal Cancer | CA2      | 0        | -16.253863 | * |
| 1343 | Colorectal Cancer | FAM55D   | 0        | -15.875662 | * |
| 1344 | Colorectal Cancer | HEPACAM2 | 0        | -13.446451 | * |
| 1345 | Colorectal Cancer | MYH11    | 0.000001 | -12.464317 | * |
| 1346 | Colorectal Cancer | FCGBP    | 0        | -11.435381 | * |
| 1347 | Colorectal Cancer | IGJ      | 0        | -9.782349  | * |
| 1348 | Colorectal Cancer | PIGR     | 0.00014  | -8.779625  | * |



|      |                   |            |          |           |   |
|------|-------------------|------------|----------|-----------|---|
| 1349 | Colorectal Cancer | CA12       | 0.000136 | -5.903099 | * |
| 1350 | Colorectal Cancer | ST6GALNAC1 | 0        | -4.4897   | * |
| 1351 | Colorectal Cancer | VSIG2      | 0.000043 | -4.221688 | * |
| 1352 | Colorectal Cancer | PLA2G10    | 0        | -3.722207 | * |
| 1353 | Colorectal Cancer | TSPAN1     | 0.000001 | -3.277753 | * |
| 1354 | Colorectal Cancer | ITM2C      | 0.000001 | -2.872164 | * |
| 1355 | Colorectal Cancer | C6orf105   | 0.000115 | -2.77523  | * |
| 1356 | Colorectal Cancer | CAPN9      | 0.000016 | -2.643441 | * |
| 1357 | Colorectal Cancer | AGR2       | 0.000531 | -2.405779 | * |
| 1358 | Colorectal Cancer | ABP1       | 0.000179 | -2.385219 | * |
| 1359 | Colorectal Cancer | MYO1A      | 0.000642 | -2.309044 | * |
| 1360 | Colorectal Cancer | BCAS1      | 0.000006 | -2.292699 | * |
| 1361 | Colorectal Cancer | SCNN1B     | 0.000177 | -2.287546 | * |
| 1362 | Colorectal Cancer | FAM46C     | 0.000021 | -2.273251 | * |
| 1363 | Colorectal Cancer | FRZB       | 0.000071 | -2.263728 | * |
| 1364 | Colorectal Cancer | BTNL3      | 0.000071 | -2.24713  | * |
| 1365 | Colorectal Cancer | LPAR1      | 0        | -2.101231 | * |
| 1366 | Colorectal Cancer | LGALS4     | 0.000004 | -2.055385 | * |
| 1367 | Colorectal Cancer | ZNF282     | 0        | 2.036182  | * |
| 1368 | Colorectal Cancer | SET        | 0        | 2.042096  | * |
| 1369 | Colorectal Cancer | ITIH2      | 0        | 2.398352  | * |
| 1370 | Colorectal Cancer | LTBP2      | 0        | 2.53017   | * |
| 1371 | Colorectal Cancer | EEPD1      | 0        | 2.633427  | * |
| 1372 | Colorectal Cancer | FAM188B    | 0        | 2.650885  | * |
| 1373 | Colorectal Cancer | C7orf68    | 0.000001 | 2.713761  | * |
| 1374 | Colorectal Cancer | TOP1MT     | 0        | 2.723722  | * |
| 1375 | Colorectal Cancer | TCOF1      | 0        | 2.727922  | * |
| 1376 | Colorectal Cancer | GPR176     | 0        | 2.759087  | * |
| 1377 | Colorectal Cancer | HABP2      | 0        | 2.896576  | * |
| 1378 | Colorectal Cancer | GRB10      | 0        | 2.927995  | * |
| 1379 | Colorectal Cancer | SLC41A1    | 0        | 2.968926  | * |
| 1380 | Colorectal Cancer | PPEF1      | 0        | 2.974042  | * |
| 1381 | Colorectal Cancer | SGIP1      | 0        | 3.035792  | * |
| 1382 | Colorectal Cancer | SOX4       | 0        | 3.075368  | * |
| 1383 | Colorectal Cancer | GDPD5      | 0        | 3.12273   | * |
| 1384 | Colorectal Cancer | KIAA1257   | 0        | 3.140853  | * |
| 1385 | Colorectal Cancer | SEC14L2    | 0        | 3.188415  | * |
| 1386 | Colorectal Cancer | DNAH5      | 0        | 3.204015  | * |
| 1387 | Colorectal Cancer | PDE10A     | 0        | 3.215748  | * |
| 1388 | Colorectal Cancer | CDKN2A     | 0        | 3.262812  | * |
| 1389 | Colorectal Cancer | RNF32      | 0        | 3.26672   | * |
| 1390 | Colorectal Cancer | SLC9A7     | 0        | 3.2869    | * |
| 1391 | Colorectal Cancer | ITGA11     | 0        | 3.303535  | * |
| 1392 | Colorectal Cancer | ADAMTS2    | 0        | 3.332996  | * |
| 1393 | Colorectal Cancer | P4HA3      | 0        | 3.358196  | * |
| 1394 | Colorectal Cancer | BFSP1      | 0        | 3.394537  | * |
| 1395 | Colorectal Cancer | LPCAT1     | 0        | 3.398193  | * |
| 1396 | Colorectal Cancer | TCF7       | 0        | 3.484109  | * |
| 1397 | Colorectal Cancer | IRAK2      | 0        | 3.526085  | * |
| 1398 | Colorectal Cancer | ADAMTS6    | 0        | 3.581777  | * |

|      |                   |            |   |           |   |
|------|-------------------|------------|---|-----------|---|
| 1399 | Colorectal Cancer | GLS2       | 0 | 3.614199  | * |
| 1400 | Colorectal Cancer | ALDH3B2    | 0 | 3.771741  | * |
| 1401 | Colorectal Cancer | HS6ST2     | 0 | 3.806945  | * |
| 1402 | Colorectal Cancer | TBX20      | 0 | 3.863409  | * |
| 1403 | Colorectal Cancer | HAPLN3     | 0 | 3.864986  | * |
| 1404 | Colorectal Cancer | LEPRE1     | 0 | 3.929111  | * |
| 1405 | Colorectal Cancer | FAM150A    | 0 | 3.955729  | * |
| 1406 | Colorectal Cancer | CSGALNACT1 | 0 | 3.983069  | * |
| 1407 | Colorectal Cancer | VWA2       | 0 | 3.985745  | * |
| 1408 | Colorectal Cancer | LRRC34     | 0 | 4.101056  | * |
| 1409 | Colorectal Cancer | PJA1       | 0 | 4.103211  | * |
| 1410 | Colorectal Cancer | GAS2       | 0 | 4.130475  | * |
| 1411 | Colorectal Cancer | PTP4A3     | 0 | 4.198752  | * |
| 1412 | Colorectal Cancer | ACSL6      | 0 | 4.21929   | * |
| 1413 | Colorectal Cancer | C1orf135   | 0 | 4.242459  | * |
| 1414 | Colorectal Cancer | SNTB1      | 0 | 4.273359  | * |
| 1415 | Colorectal Cancer | TNFSF11    | 0 | 4.302181  | * |
| 1416 | Colorectal Cancer | MTHFD1L    | 0 | 4.380449  | * |
| 1417 | Colorectal Cancer | STC1       | 0 | 4.395318  | * |
| 1418 | Colorectal Cancer | ODAM       | 0 | 4.447008  | * |
| 1419 | Colorectal Cancer | WDR66      | 0 | 4.447168  | * |
| 1420 | Colorectal Cancer | CSF2       | 0 | 4.465932  | * |
| 1421 | Colorectal Cancer | PAH        | 0 | 4.501848  | * |
| 1422 | Colorectal Cancer | LOXL2      | 0 | 4.528196  | * |
| 1423 | Colorectal Cancer | NEK5       | 0 | 4.545746  | * |
| 1424 | Colorectal Cancer | GRHL1      | 0 | 4.760864  | * |
| 1425 | Colorectal Cancer | PLAU       | 0 | 4.841344  | * |
| 1426 | Colorectal Cancer | DIO2       | 0 | 4.877771  | * |
| 1427 | Colorectal Cancer | HCN1       | 0 | 4.993712  | * |
| 1428 | Colorectal Cancer | ICOS       | 0 | 5.13095   | * |
| 1429 | Colorectal Cancer | CYP39A1    | 0 | 5.382667  | * |
| 1430 | Colorectal Cancer | CDH6       | 0 | 5.400039  | * |
| 1431 | Colorectal Cancer | GRIN2B     | 0 | 5.605313  | * |
| 1432 | Colorectal Cancer | PDPN       | 0 | 5.623195  | * |
| 1433 | Colorectal Cancer | EGFL6      | 0 | 5.80168   | * |
| 1434 | Colorectal Cancer | ANGPT2     | 0 | 5.811083  | * |
| 1435 | Colorectal Cancer | ADAMTS12   | 0 | 6.346981  | * |
| 1436 | Colorectal Cancer | KRT80      | 0 | 6.582092  | * |
| 1437 | Colorectal Cancer | JUB        | 0 | 6.6753    | * |
| 1438 | Colorectal Cancer | MFAP2      | 0 | 6.758639  | * |
| 1439 | Colorectal Cancer | COL11A1    | 0 | 7.090537  | * |
| 1440 | Colorectal Cancer | SPP1       | 0 | 7.465531  | * |
| 1441 | Colorectal Cancer | ESM1       | 0 | 7.595544  | * |
| 1442 | Colorectal Cancer | COL10A1    | 0 | 7.669827  | * |
| 1443 | Colorectal Cancer | LEMD1      | 0 | 7.698407  | * |
| 1444 | Colorectal Cancer | INHBA      | 0 | 7.715281  | * |
| 1445 | Colorectal Cancer | KAL1       | 0 | 8.67666   | * |
| 1446 | Colorectal Cancer | ADAM12     | 0 | 9.08807   | * |
| 1447 | Colorectal Cancer | KIAA1199   | 0 | 10.5275   | * |
| 1448 | Colorectal Cancer | CHI3L1     | 0 | 10.717129 | * |



|      |                      |           |          |            |   |
|------|----------------------|-----------|----------|------------|---|
| 1449 | Colorectal Cancer    | MSX2      | 0        | 11.332886  | * |
| 1450 | Colorectal Cancer    | CDH3      | 0        | 16.214804  | * |
| 1451 | Colorectal Cancer    | FAP       | 0        | 18.387175  | * |
| 1452 | Colorectal Cancer    | MMP7      | 0        | 32.841944  | * |
| 1453 | Colorectal Neoplasms | GUCA2A    | 0        | -16.294008 | * |
| 1454 | Colorectal Neoplasms | SLC26A3   | 0        | -13.167276 | * |
| 1455 | Colorectal Neoplasms | IFITM1    | 0        | 4.28338    | * |
| 1456 | Colorectal Neoplasms | CXCL1     | 0        | 5.226033   | * |
| 1457 | Disease              | KCND3     | 0.000126 | 3.374661   | * |
| 1458 | Dysplasia            | SLC26A3   | 0        | -38.08636  | * |
| 1459 | Dysplasia            | GCG       | 0.000008 | -11.58098  | * |
| 1460 | Dysplasia            | NEUROD1   | 0.000008 | -8.968304  | * |
| 1461 | Dysplasia            | USP2      | 0.000001 | -7.413002  | * |
| 1462 | Dysplasia            | CHGA      | 0        | -7.303062  | * |
| 1463 | Dysplasia            | CA1       | 0        | -6.471103  | * |
| 1464 | Dysplasia            | MS4A12    | 0.000002 | -5.212096  | * |
| 1465 | Dysplasia            | NR3C1     | 0        | -5.199333  | * |
| 1466 | Dysplasia            | CA4       | 0.000006 | -4.974505  | * |
| 1467 | Dysplasia            | PAG1      | 0        | -4.492958  | * |
| 1468 | Dysplasia            | CDKN2B    | 0.000002 | -4.005555  | * |
| 1469 | Dysplasia            | CLDN23    | 0.000001 | -3.972223  | * |
| 1470 | Dysplasia            | SLC4A4    | 0.000001 | -3.939493  | * |
| 1471 | Dysplasia            | LOC344887 | 0.000002 | -3.69458   | * |
| 1472 | Dysplasia            | EDN3      | 0.000003 | -3.516323  | * |
| 1473 | Dysplasia            | PKIB      | 0.000005 | -3.330976  | * |
| 1474 | Dysplasia            | TIMP2     | 0        | -3.292712  | * |
| 1475 | Dysplasia            | CP        | 0.000001 | -3.280806  | * |
| 1476 | Dysplasia            | ADAMDEC1  | 0.000001 | -3.259981  | * |
| 1477 | Dysplasia            | TP53INP2  | 0        | -3.238175  | * |
| 1478 | Dysplasia            | PLAC9     | 0.000002 | -3.223752  | * |
| 1479 | Dysplasia            | PTPRR     | 0.000004 | -3.091864  | * |
| 1480 | Dysplasia            | C2orf88   | 0.000004 | -2.991349  | * |
| 1481 | Dysplasia            | ANK2      | 0        | -2.956341  | * |
| 1482 | Dysplasia            | POSTN     | 0        | -2.944184  | * |
| 1483 | Dysplasia            | CPNE8     | 0        | -2.902986  | * |
| 1484 | Dysplasia            | F13A1     | 0.000005 | -2.837147  | * |
| 1485 | Dysplasia            | TMEM171   | 0.000006 | -2.783301  | * |
| 1486 | Dysplasia            | COL13A1   | 0        | -2.675191  | * |
| 1487 | Dysplasia            | SNAI2     | 0        | -2.66951   | * |
| 1488 | Dysplasia            | DHRS11    | 0.000006 | -2.66922   | * |
| 1489 | Dysplasia            | GPMB      | 0.000002 | -2.653335  | * |
| 1490 | Dysplasia            | MXD1      | 0        | -2.559257  | * |
| 1491 | Dysplasia            | ZEB2      | 0.000001 | -2.528816  | * |
| 1492 | Dysplasia            | COLEC12   | 0        | -2.485879  | * |
| 1493 | Dysplasia            | DCN       | 0        | -2.458779  | * |
| 1494 | Dysplasia            | SIGLEC1   | 0.000003 | -2.44309   | * |
| 1495 | Dysplasia            | SEMA6D    | 0.000002 | -2.40759   | * |
| 1496 | Dysplasia            | IL6R      | 0        | -2.389857  | * |
| 1497 | Dysplasia            | C14orf139 | 0        | -2.318159  | * |
| 1498 | Dysplasia            | LPAR1     | 0        | -2.271204  | * |

|      |                      |              |          |             |   |
|------|----------------------|--------------|----------|-------------|---|
| 1499 | Dysplasia            | NRP1         | 0.000003 | -2.253391   | * |
| 1500 | Dysplasia            | ARHGAP15     | 0.000001 | -2.248758   | * |
| 1501 | Dysplasia            | ITIH5        | 0        | -2.235978   | * |
| 1502 | Dysplasia            | EDIL3        | 0        | -2.227613   | * |
| 1503 | Dysplasia            | GNA11        | 0.000002 | -2.227225   | * |
| 1504 | Dysplasia            | FRMD6        | 0.000006 | -2.221702   | * |
| 1505 | Dysplasia            | NDN          | 0.000001 | -2.218137   | * |
| 1506 | Dysplasia            | TMCC3        | 0.000007 | -2.19297    | * |
| 1507 | Dysplasia            | TRPC1        | 0        | -2.185608   | * |
| 1508 | Dysplasia            | B3GNT7       | 0.000007 | -2.180997   | * |
| 1509 | Dysplasia            | MGAT4A       | 0        | -2.169524   | * |
| 1510 | Dysplasia            | ARHGAP42     | 0        | -2.119791   | * |
| 1511 | Dysplasia            | IGFBP3       | 0        | -2.099543   | * |
| 1512 | Dysplasia            | LOC100127983 | 0.000008 | -2.096915   | * |
| 1513 | Dysplasia            | C17orf91     | 0.000002 | -2.0713     | * |
| 1514 | Dysplasia            | COL6A2       | 0        | -2.03661    | * |
| 1515 | Dysplasia            | COL3A1       | 0        | -2.027751   | * |
| 1516 | Dysplasia            | DOCK10       | 0.000008 | -2.010241   | * |
| 1517 | Hematocrit procedure | LYZ          | 0        | -553.965593 | * |
| 1518 | Hematocrit procedure | UGT1A1       | 0        | -289.754891 | * |
| 1519 | Hematocrit procedure | POF1B        | 0        | -256.130843 | * |
| 1520 | Hematocrit procedure | LGALS4       | 0.000001 | -249.000167 | * |
| 1521 | Hematocrit procedure | TOX3         | 0        | -188.756066 | * |
| 1522 | Hematocrit procedure | GPX2         | 0        | -174.729443 | * |
| 1523 | Hematocrit procedure | S100P        | 0        | -164.471276 | * |
| 1524 | Hematocrit procedure | TM4SF1       | 0.000002 | -117.507367 | * |
| 1525 | Hematocrit procedure | HKDC1        | 0.000001 | -65.399986  | * |
| 1526 | Hematocrit procedure | CLRN3        | 0        | -63.568249  | * |
| 1527 | Hematocrit procedure | LY75         | 0        | -63.005992  | * |
| 1528 | Hematocrit procedure | AMIGO2       | 0.000001 | -44.444089  | * |
| 1529 | Hematocrit procedure | TGFBI        | 0        | -44.172228  | * |
| 1530 | Hematocrit procedure | AKR1C3       | 0.000007 | -41.255223  | * |
| 1531 | Hematocrit procedure | GIPC2        | 0.000001 | -38.52687   | * |
| 1532 | Hematocrit procedure | LGR5         | 0.000002 | -36.312211  | * |
| 1533 | Hematocrit procedure | SPAG16       | 0.000005 | -27.406277  | * |
| 1534 | Hematocrit procedure | GCNT3        | 0.000006 | -27.110823  | * |
| 1535 | Hematocrit procedure | CD24         | 0.000001 | -25.242614  | * |
| 1536 | Hematocrit procedure | HNMT         | 0.000005 | -21.776943  | * |
| 1537 | Hematocrit procedure | TNFSF10      | 0.000002 | -18.515111  | * |
| 1538 | Hematocrit procedure | KIAA1199     | 0        | -17.561393  | * |
| 1539 | Hematocrit procedure | ITGB6        | 0.000001 | -16.820715  | * |
| 1540 | Hematocrit procedure | SLC22A3      | 0.000001 | -16.487081  | * |
| 1541 | Hematocrit procedure | RASSF6       | 0.000001 | -16.482922  | * |
| 1542 | Hematocrit procedure | LOC339290    | 0.000008 | -12.446039  | * |
| 1543 | Hematocrit procedure | PMEPA1       | 0.000003 | -12.174786  | * |
| 1544 | Hematocrit procedure | MUC13        | 0.000058 | -11.700251  | * |
| 1545 | Hematocrit procedure | LRIG1        | 0        | -10.409232  | * |
| 1546 | Hematocrit procedure | HIST1H2BG    | 0.000042 | -10.401582  | * |
| 1547 | Hematocrit procedure | ANKS4B       | 0.000008 | -9.996164   | * |
| 1548 | Hematocrit procedure | NCRNA00094   | 0.000004 | -9.731985   | * |

|      |                      |          |          |           |   |
|------|----------------------|----------|----------|-----------|---|
| 1549 | Hematocrit procedure | TMPRSS2  | 0        | -9.451476 | * |
| 1550 | Hematocrit procedure | HGD      | 0.000002 | -8.781096 | * |
| 1551 | Hematocrit procedure | MAP2K6   | 0        | -8.252522 | * |
| 1552 | Hematocrit procedure | AMACR    | 0.000008 | -7.819271 | * |
| 1553 | Hematocrit procedure | MAML2    | 0.000002 | -7.453422 | * |
| 1554 | Hematocrit procedure | GMDS     | 0        | -7.063824 | * |
| 1555 | Hematocrit procedure | TST      | 0.000009 | -6.449722 | * |
| 1556 | Hematocrit procedure | TMEM139  | 0.000003 | -6.3594   | * |
| 1557 | Hematocrit procedure | CEACAM1  | 0.000008 | -5.954795 | * |
| 1558 | Hematocrit procedure | H2AFJ    | 0        | -5.259377 | * |
| 1559 | Hematocrit procedure | SPNS2    | 0.000025 | -4.766598 | * |
| 1560 | Hematocrit procedure | SMAD6    | 0.000001 | -4.666987 | * |
| 1561 | Hematocrit procedure | SERPINB1 | 0.000006 | -4.559866 | * |
| 1562 | Hematocrit procedure | CTSC     | 0        | -4.484061 | * |
| 1563 | Hematocrit procedure | STON2    | 0.000011 | -4.358066 | * |
| 1564 | Hematocrit procedure | TAGLN2   | 0        | -4.272309 | * |
| 1565 | Hematocrit procedure | C20orf24 | 0        | -4.02621  | * |
| 1566 | Hematocrit procedure | ABHD2    | 0.000006 | -3.99146  | * |
| 1567 | Hematocrit procedure | KCNE3    | 0.000001 | -3.944067 | * |
| 1568 | Hematocrit procedure | ISG20    | 0.000055 | -3.692702 | * |
| 1569 | Hematocrit procedure | TXNDC9   | 0.000004 | -3.677724 | * |
| 1570 | Hematocrit procedure | MCF2L    | 0.000008 | -3.374845 | * |
| 1571 | Hematocrit procedure | NET1     | 0        | -3.263517 | * |
| 1572 | Hematocrit procedure | TGFBR2   | 0.000016 | -3.161223 | * |
| 1573 | Hematocrit procedure | ANXA4    | 0.000014 | -3.10173  | * |
| 1574 | Hematocrit procedure | ECH1     | 0.000006 | -3.002113 | * |
| 1575 | Hematocrit procedure | FZD5     | 0.000021 | -2.968789 | * |
| 1576 | Hematocrit procedure | NT5C3    | 0.000002 | -2.927017 | * |
| 1577 | Hematocrit procedure | SLC12A7  | 0        | -2.913571 | * |
| 1578 | Hematocrit procedure | HSDL2    | 0.000005 | -2.883179 | * |
| 1579 | Hematocrit procedure | EEPD1    | 0.000002 | -2.850552 | * |
| 1580 | Hematocrit procedure | ZFP36L2  | 0.000004 | -2.797318 | * |
| 1581 | Hematocrit procedure | GOLT1A   | 0.000024 | -2.695651 | * |
| 1582 | Hematocrit procedure | POLD4    | 0.000018 | -2.59396  | * |
| 1583 | Hematocrit procedure | SLC2A1   | 0.000044 | -2.562317 | * |
| 1584 | Hematocrit procedure | ACP6     | 0        | -2.543673 | * |
| 1585 | Hematocrit procedure | NUP98    | 0.000004 | -2.419936 | * |
| 1586 | Hematocrit procedure | PLS1     | 0.00001  | -2.369724 | * |
| 1587 | Hematocrit procedure | CHMP4B   | 0.000095 | -2.343461 | * |
| 1588 | Hematocrit procedure | ZNF630   | 0.000001 | -2.331547 | * |
| 1589 | Hematocrit procedure | HNRNPH1  | 0.000008 | -2.244705 | * |
| 1590 | Hematocrit procedure | KIF13B   | 0.000002 | -2.140129 | * |
| 1591 | Hematocrit procedure | LRRC8A   | 0.00026  | -2.128568 | * |
| 1592 | Hematocrit procedure | S100A11  | 0.000071 | -2.068479 | * |
| 1593 | Hematocrit procedure | FTH1     | 0.000001 | -2.066176 | * |
| 1594 | Hematocrit procedure | HNF4A    | 0.000009 | -2.034895 | * |
| 1595 | Hematocrit procedure | GPR56    | 0.000287 | -2.03382  | * |
| 1596 | Hematocrit procedure | FABP5    | 0.000142 | 2.003741  | * |
| 1597 | Hematocrit procedure | TRIM23   | 0        | 2.043023  | * |
| 1598 | Hematocrit procedure | CCDC69   | 0        | 2.051861  | * |

|      |                      |            |          |          |   |
|------|----------------------|------------|----------|----------|---|
| 1599 | Hematocrit procedure | CUL9       | 0.000024 | 2.055442 | * |
| 1600 | Hematocrit procedure | HMG20B     | 0.000004 | 2.058405 | * |
| 1601 | Hematocrit procedure | CBX6       | 0.000044 | 2.060868 | * |
| 1602 | Hematocrit procedure | SFRS18     | 0        | 2.071387 | * |
| 1603 | Hematocrit procedure | C3orf39    | 0.000125 | 2.082127 | * |
| 1604 | Hematocrit procedure | SMAD2      | 0.000023 | 2.082566 | * |
| 1605 | Hematocrit procedure | PTPRG      | 0.000062 | 2.084443 | * |
| 1606 | Hematocrit procedure | C17orf68   | 0.000008 | 2.107659 | * |
| 1607 | Hematocrit procedure | RGS10      | 0.000017 | 2.113307 | * |
| 1608 | Hematocrit procedure | NKX3-1     | 0.000018 | 2.119512 | * |
| 1609 | Hematocrit procedure | ZYG11B     | 0.000024 | 2.149045 | * |
| 1610 | Hematocrit procedure | FECH       | 0.000165 | 2.201653 | * |
| 1611 | Hematocrit procedure | PBK        | 0.00004  | 2.213962 | * |
| 1612 | Hematocrit procedure | GNG10      | 0.000082 | 2.228616 | * |
| 1613 | Hematocrit procedure | PIAS2      | 0.000005 | 2.235642 | * |
| 1614 | Hematocrit procedure | RNF138     | 0.000051 | 2.239473 | * |
| 1615 | Hematocrit procedure | TYMS       | 0.000001 | 2.30578  | * |
| 1616 | Hematocrit procedure | MED13L     | 0.000012 | 2.322913 | * |
| 1617 | Hematocrit procedure | HSPB1      | 0.000012 | 2.343433 | * |
| 1618 | Hematocrit procedure | HEXIM1     | 0.000003 | 2.358521 | * |
| 1619 | Hematocrit procedure | KANK2      | 0.000005 | 2.367209 | * |
| 1620 | Hematocrit procedure | MYO5A      | 0        | 2.367748 | * |
| 1621 | Hematocrit procedure | RPRD1A     | 0.000009 | 2.390988 | * |
| 1622 | Hematocrit procedure | NISCH      | 0.000011 | 2.402661 | * |
| 1623 | Hematocrit procedure | SYNCRIP    | 0        | 2.42249  | * |
| 1624 | Hematocrit procedure | NFAT5      | 0.000137 | 2.425518 | * |
| 1625 | Hematocrit procedure | STYX       | 0.000003 | 2.447138 | * |
| 1626 | Hematocrit procedure | UBXN8      | 0        | 2.509628 | * |
| 1627 | Hematocrit procedure | PSIP1      | 0.000032 | 2.535774 | * |
| 1628 | Hematocrit procedure | GABBR1     | 0.000003 | 2.587627 | * |
| 1629 | Hematocrit procedure | C21orf91   | 0        | 2.609282 | * |
| 1630 | Hematocrit procedure | ITPRIPL2   | 0.000075 | 2.686906 | * |
| 1631 | Hematocrit procedure | DHX30      | 0.000003 | 2.694996 | * |
| 1632 | Hematocrit procedure | CIRBP      | 0.000011 | 2.747841 | * |
| 1633 | Hematocrit procedure | SGSM1      | 0        | 2.890026 | * |
| 1634 | Hematocrit procedure | NAB2       | 0.000002 | 2.897102 | * |
| 1635 | Hematocrit procedure | FAM160B1   | 0.000002 | 2.933826 | * |
| 1636 | Hematocrit procedure | CTSL1      | 0.000013 | 3.010972 | * |
| 1637 | Hematocrit procedure | PTRF       | 0.000032 | 3.038161 | * |
| 1638 | Hematocrit procedure | SLC39A6    | 0        | 3.146657 | * |
| 1639 | Hematocrit procedure | FAT1       | 0.000013 | 3.147665 | * |
| 1640 | Hematocrit procedure | CLU        | 0.000081 | 3.269041 | * |
| 1641 | Hematocrit procedure | ACVR2B     | 0.000005 | 3.390992 | * |
| 1642 | Hematocrit procedure | BTG3       | 0.000026 | 3.443329 | * |
| 1643 | Hematocrit procedure | ST6GALNAC2 | 0        | 3.444906 | * |
| 1644 | Hematocrit procedure | PTGES      | 0        | 3.474348 | * |
| 1645 | Hematocrit procedure | SLC25A37   | 0.000003 | 3.556737 | * |
| 1646 | Hematocrit procedure | MXRA7      | 0.000007 | 3.70477  | * |
| 1647 | Hematocrit procedure | APBB2      | 0.000002 | 3.772794 | * |
| 1648 | Hematocrit procedure | MT1E       | 0.000058 | 3.774363 | * |

|      |                                       |            |          |            |   |
|------|---------------------------------------|------------|----------|------------|---|
| 1649 | Hematocrit procedure                  | JAG2       | 0.000111 | 3.78717    | * |
| 1650 | Hematocrit procedure                  | SLC26A11   | 0.000007 | 3.832825   | * |
| 1651 | Hematocrit procedure                  | TMEM98     | 0        | 3.881347   | * |
| 1652 | Hematocrit procedure                  | TWSG1      | 0.000008 | 3.912104   | * |
| 1653 | Hematocrit procedure                  | ZDHHC2     | 0.000001 | 3.993547   | * |
| 1654 | Hematocrit procedure                  | FZD2       | 0        | 4.030252   | * |
| 1655 | Hematocrit procedure                  | PSTPIP2    | 0.000008 | 4.10078    | * |
| 1656 | Hematocrit procedure                  | GPC1       | 0.000011 | 4.112104   | * |
| 1657 | Hematocrit procedure                  | AIF1L      | 0.000064 | 4.187511   | * |
| 1658 | Hematocrit procedure                  | GPR137B    | 0.000096 | 4.529965   | * |
| 1659 | Hematocrit procedure                  | RNF144A    | 0.000002 | 4.736778   | * |
| 1660 | Hematocrit procedure                  | RHOF       | 0.000006 | 4.754852   | * |
| 1661 | Hematocrit procedure                  | PDGFRL     | 0.000039 | 4.789713   | * |
| 1662 | Hematocrit procedure                  | FRMD6      | 0.000002 | 5.304811   | * |
| 1663 | Hematocrit procedure                  | C1orf115   | 0.00001  | 5.876075   | * |
| 1664 | Hematocrit procedure                  | FAM164A    | 0.000005 | 5.904321   | * |
| 1665 | Hematocrit procedure                  | CFL2       | 0        | 6.04272    | * |
| 1666 | Hematocrit procedure                  | KLC3       | 0.000003 | 6.402367   | * |
| 1667 | Hematocrit procedure                  | MFAP3L     | 0.000033 | 6.479532   | * |
| 1668 | Hematocrit procedure                  | TIMP2      | 0.000006 | 8.705022   | * |
| 1669 | Hematocrit procedure                  | ZC3H12C    | 0.000033 | 8.930023   | * |
| 1670 | Hematocrit procedure                  | MOCS1      | 0        | 9.33562    | * |
| 1671 | Hematocrit procedure                  | OSBPL6     | 0        | 9.871076   | * |
| 1672 | Hematocrit procedure                  | PLAGL1     | 0.000041 | 10.015007  | * |
| 1673 | Hematocrit procedure                  | ID2        | 0.000001 | 10.221989  | * |
| 1674 | Hematocrit procedure                  | GJA3       | 0.000018 | 10.47161   | * |
| 1675 | Hematocrit procedure                  | GAMT       | 0        | 10.974298  | * |
| 1676 | Hematocrit procedure                  | C8orf47    | 0.000005 | 12.045282  | * |
| 1677 | Hematocrit procedure                  | TUBB6      | 0.000001 | 12.188465  | * |
| 1678 | Hematocrit procedure                  | SIX4       | 0.000011 | 12.215531  | * |
| 1679 | Hematocrit procedure                  | SEPP1      | 0        | 12.288043  | * |
| 1680 | Hematocrit procedure                  | OGFRL1     | 0.000003 | 12.864371  | * |
| 1681 | Hematocrit procedure                  | MT1X       | 0.000004 | 13.99134   | * |
| 1682 | Hematocrit procedure                  | SERPINB9   | 0.000001 | 14.452624  | * |
| 1683 | Hematocrit procedure                  | B3GALNT1   | 0.000003 | 15.014644  | * |
| 1684 | Hematocrit procedure                  | NCRNA00173 | 0.000006 | 16.974223  | * |
| 1685 | Hematocrit procedure                  | RBM24      | 0.000003 | 17.565277  | * |
| 1686 | Hematocrit procedure                  | SMAD4      | 0.000004 | 18.303144  | * |
| 1687 | Hematocrit procedure                  | SPIRE1     | 0.000001 | 18.354058  | * |
| 1688 | Hematocrit procedure                  | RUNDC3B    | 0.000012 | 22.999973  | * |
| 1689 | Hematocrit procedure                  | FAM92A1    | 0.000002 | 34.853387  | * |
| 1690 | Hematocrit procedure                  | FAM171B    | 0.000005 | 38.639504  | * |
| 1691 | Hematocrit procedure                  | DSE        | 0.000008 | 44.952396  | * |
| 1692 | Hematocrit procedure                  | PHLDB2     | 0        | 79.357183  | * |
| 1693 | Hematocrit procedure                  | NLRP2      | 0        | 110.051078 | * |
| 1694 | Hematocrit procedure                  | WBP5       | 0.000004 | 121.981655 | * |
| 1695 | Hematocrit procedure                  | HLTF       | 0.000003 | 143.882085 | * |
| 1696 | Hematocrit procedure                  | RDX        | 0.000002 | 174.326299 | * |
| 1697 | Histopathologic Grade differentiation | KRT23      | 0        | -31.554983 | * |
| 1698 | Histopathologic Grade differentiation | ABCC2      | 0.000003 | -27.577196 | * |



|      |                                       |              |          |            |   |
|------|---------------------------------------|--------------|----------|------------|---|
| 1699 | Histopathologic Grade differentiation | TCEA2        | 0.000183 | -11.483034 | * |
| 1700 | Histopathologic Grade differentiation | TIAM1        | 0.003852 | -9.403248  | * |
| 1701 | Histopathologic Grade differentiation | PPP2R2C      | 0.00274  | -9.26497   | * |
| 1702 | Histopathologic Grade differentiation | MSLN         | 0.000014 | -7.882214  | * |
| 1703 | Histopathologic Grade differentiation | GALNAC4S-6S  | 0.000036 | -7.880769  | * |
| 1704 | Histopathologic Grade differentiation | GGT1         | 0.000343 | -7.50888   | * |
| 1705 | Histopathologic Grade differentiation | C20orf46     | 0.00026  | -7.033766  | * |
| 1706 | Histopathologic Grade differentiation | ZFYVE28      | 0.012802 | -6.738983  | * |
| 1707 | Histopathologic Grade differentiation | ATL1         | 0.001975 | -6.449874  | * |
| 1708 | Histopathologic Grade differentiation | RUNX3        | 0.0004   | -6.375437  | * |
| 1709 | Histopathologic Grade differentiation | NPM2         | 0.009835 | -5.9987    | * |
| 1710 | Histopathologic Grade differentiation | LEMD1        | 0.001041 | -5.571908  | * |
| 1711 | Histopathologic Grade differentiation | NAV1         | 0.000001 | -5.450984  | * |
| 1712 | Histopathologic Grade differentiation | FSCN1        | 0.000618 | -5.406554  | * |
| 1713 | Histopathologic Grade differentiation | MAN1A1       | 0.000002 | -4.80628   | * |
| 1714 | Histopathologic Grade differentiation | DGKG         | 0.000138 | -4.561431  | * |
| 1715 | Histopathologic Grade differentiation | LPAR5        | 0.000338 | -4.020064  | * |
| 1716 | Histopathologic Grade differentiation | FLJ45248     | 0.003884 | -3.840689  | * |
| 1717 | Histopathologic Grade differentiation | ZNF302       | 0.004005 | -3.387918  | * |
| 1718 | Histopathologic Grade differentiation | LRP4         | 0.000123 | -2.918713  | * |
| 1719 | Histopathologic Grade differentiation | HSPA2        | 0.003738 | -2.778928  | * |
| 1720 | Histopathologic Grade differentiation | GRAMD1A      | 0.006135 | -2.759221  | * |
| 1721 | Histopathologic Grade differentiation | RIBC2        | 0.007882 | -2.74858   | * |
| 1722 | Histopathologic Grade differentiation | ZNF502       | 0.001534 | -2.742984  | * |
| 1723 | Histopathologic Grade differentiation | STC2         | 0.012034 | -2.733117  | * |
| 1724 | Histopathologic Grade differentiation | DNAJC22      | 0.000113 | -2.570394  | * |
| 1725 | Histopathologic Grade differentiation | SLC4A11      | 0.004788 | -2.437059  | * |
| 1726 | Histopathologic Grade differentiation | LOC100132288 | 0.008019 | -2.425738  | * |
| 1727 | Histopathologic Grade differentiation | ZNF385A      | 0.006949 | -2.40828   | * |
| 1728 | Histopathologic Grade differentiation | DEF6         | 0.002951 | -2.398968  | * |
| 1729 | Histopathologic Grade differentiation | FGD1         | 0.002489 | -2.258271  | * |
| 1730 | Histopathologic Grade differentiation | OSBPL3       | 0.00043  | -2.251679  | * |
| 1731 | Histopathologic Grade differentiation | KCNH2        | 0.000051 | -2.224479  | * |
| 1732 | Histopathologic Grade differentiation | RNF219       | 0.008574 | -2.149713  | * |
| 1733 | Histopathologic Grade differentiation | CYB5R4       | 0.000476 | -2.133322  | * |
| 1734 | Histopathologic Grade differentiation | SLC25A24     | 0.006832 | 2.002397   | * |
| 1735 | Histopathologic Grade differentiation | FAM135A      | 0.00889  | 2.024645   | * |
| 1736 | Histopathologic Grade differentiation | DGKE         | 0.000418 | 2.036216   | * |
| 1737 | Histopathologic Grade differentiation | ZNF217       | 0.003393 | 2.093951   | * |
| 1738 | Histopathologic Grade differentiation | DENND1B      | 0.000814 | 2.109635   | * |
| 1739 | Histopathologic Grade differentiation | PLEKHF2      | 0.005589 | 2.12744    | * |
| 1740 | Histopathologic Grade differentiation | SIPA1L1      | 0.00484  | 2.129215   | * |
| 1741 | Histopathologic Grade differentiation | GTPBP2       | 0.002516 | 2.129316   | * |
| 1742 | Histopathologic Grade differentiation | DMXL2        | 0.000002 | 2.133636   | * |
| 1743 | Histopathologic Grade differentiation | CDKL5        | 0.005535 | 2.175485   | * |
| 1744 | Histopathologic Grade differentiation | GALNT12      | 0.000014 | 2.180533   | * |
| 1745 | Histopathologic Grade differentiation | SVIL         | 0.000427 | 2.21181    | * |
| 1746 | Histopathologic Grade differentiation | SLC1A1       | 0.000085 | 2.304518   | * |
| 1747 | Histopathologic Grade differentiation | CRAT         | 0.000121 | 2.348142   | * |
| 1748 | Histopathologic Grade differentiation | ZNF586       | 0.000828 | 2.416349   | * |

|      |                                       |          |          |             |   |
|------|---------------------------------------|----------|----------|-------------|---|
| 1749 | Histopathologic Grade differentiation | PRKCH    | 0.01198  | 2.425591    | * |
| 1750 | Histopathologic Grade differentiation | NFIB     | 0.000008 | 2.477069    | * |
| 1751 | Histopathologic Grade differentiation | ASAP2    | 0.006933 | 2.509466    | * |
| 1752 | Histopathologic Grade differentiation | TGFB1    | 0.005622 | 2.541969    | * |
| 1753 | Histopathologic Grade differentiation | ITGAV    | 0.003534 | 2.552711    | * |
| 1754 | Histopathologic Grade differentiation | ANK3     | 0.001074 | 2.569722    | * |
| 1755 | Histopathologic Grade differentiation | MASTL    | 0.007512 | 2.686504    | * |
| 1756 | Histopathologic Grade differentiation | PTPLA    | 0.009947 | 2.737588    | * |
| 1757 | Histopathologic Grade differentiation | ETS2     | 0.003852 | 2.809661    | * |
| 1758 | Histopathologic Grade differentiation | CD59     | 0.00056  | 2.817171    | * |
| 1759 | Histopathologic Grade differentiation | CCNG2    | 0.00773  | 2.837451    | * |
| 1760 | Histopathologic Grade differentiation | STXBP6   | 0.000146 | 2.88386     | * |
| 1761 | Histopathologic Grade differentiation | INSIG2   | 0.001715 | 2.962214    | * |
| 1762 | Histopathologic Grade differentiation | C4orf3   | 0.000074 | 3.039577    | * |
| 1763 | Histopathologic Grade differentiation | HOXA5    | 0.001394 | 3.145148    | * |
| 1764 | Histopathologic Grade differentiation | OSBPL1A  | 0.004372 | 3.223307    | * |
| 1765 | Histopathologic Grade differentiation | CACNA1D  | 0.00063  | 3.233841    | * |
| 1766 | Histopathologic Grade differentiation | MATN2    | 0.016257 | 3.309188    | * |
| 1767 | Histopathologic Grade differentiation | SPAG1    | 0.010306 | 3.349719    | * |
| 1768 | Histopathologic Grade differentiation | CHRM3    | 0.005942 | 3.357614    | * |
| 1769 | Histopathologic Grade differentiation | FAM149A  | 0.001074 | 3.45578     | * |
| 1770 | Histopathologic Grade differentiation | ZNF702P  | 0.000015 | 3.689532    | * |
| 1771 | Histopathologic Grade differentiation | PELI1    | 0.001394 | 3.751149    | * |
| 1772 | Histopathologic Grade differentiation | NRP1     | 0.001394 | 3.85201     | * |
| 1773 | Histopathologic Grade differentiation | NFIA     | 0.003384 | 3.900428    | * |
| 1774 | Histopathologic Grade differentiation | MLLT3    | 0.000055 | 4.176684    | * |
| 1775 | Histopathologic Grade differentiation | OTUD1    | 0.000435 | 4.246859    | * |
| 1776 | Histopathologic Grade differentiation | ARSJ     | 0.000914 | 4.580518    | * |
| 1777 | Histopathologic Grade differentiation | TLE1     | 0.000074 | 4.643999    | * |
| 1778 | Histopathologic Grade differentiation | PLCE1    | 0.000134 | 5.168786    | * |
| 1779 | Histopathologic Grade differentiation | GAB1     | 0.004005 | 5.4968      | * |
| 1780 | Histopathologic Grade differentiation | LAMB1    | 0.000086 | 5.890751    | * |
| 1781 | Histopathologic Grade differentiation | SLC7A2   | 0.000371 | 6.327241    | * |
| 1782 | Histopathologic Grade differentiation | PPM1K    | 0.001653 | 6.563098    | * |
| 1783 | Histopathologic Grade differentiation | ERAP2    | 0.011713 | 8.452647    | * |
| 1784 | Histopathologic Grade differentiation | ACSS1    | 0.002112 | 8.548423    | * |
| 1785 | Histopathologic Grade differentiation | FOXA1    | 0.000001 | 9.243613    | * |
| 1786 | Histopathologic Grade differentiation | HOXA13   | 0.000008 | 9.675248    | * |
| 1787 | Histopathologic Grade differentiation | CYP1B1   | 0.000014 | 10.335299   | * |
| 1788 | Histopathologic Grade differentiation | PDE10A   | 0.000551 | 12.412028   | * |
| 1789 | Histopathologic Grade differentiation | DAPK1    | 0.000001 | 12.970432   | * |
| 1790 | Histopathologic Grade differentiation | RUNX2    | 0.000628 | 14.460861   | * |
| 1791 | Human cells                           | TAPBP    | 0        | 4.01667     | * |
| 1792 | Instability                           | MYH11    | 0        | 2.897326    | * |
| 1793 | Malignant Neoplasms                   | C9orf125 | 0.000072 | -1298.37944 | * |
| 1794 | Malignant Neoplasms                   | AHNAK    | 0        | -494.159908 | * |
| 1795 | Malignant Neoplasms                   | REXO2    | 0        | -404.064243 | * |
| 1796 | Malignant Neoplasms                   | CIRH1A   | 0        | -269.504631 | * |
| 1797 | Malignant Neoplasms                   | PPP2CA   | 0        | -205.443988 | * |
| 1798 | Malignant Neoplasms                   | DDB1     | 0        | -153.182139 | * |

|      |                     |            |          |             |   |
|------|---------------------|------------|----------|-------------|---|
| 1799 | Malignant Neoplasms | SRSF6      | 0        | -116.639748 | * |
| 1800 | Malignant Neoplasms | PHF20      | 0        | -112.379561 | * |
| 1801 | Malignant Neoplasms | TRIM8      | 0        | -101.821502 | * |
| 1802 | Malignant Neoplasms | STAU1      | 0        | -86.688335  | * |
| 1803 | Malignant Neoplasms | EIF3B      | 0        | -83.887792  | * |
| 1804 | Malignant Neoplasms | RNF130     | 0        | -77.051157  | * |
| 1805 | Malignant Neoplasms | CA1        | 0        | -70.177195  | * |
| 1806 | Malignant Neoplasms | TLE1       | 0        | -63.322744  | * |
| 1807 | Malignant Neoplasms | TNFRSF10B  | 0        | -51.235551  | * |
| 1808 | Malignant Neoplasms | GRPEL1     | 0        | -48.248593  | * |
| 1809 | Malignant Neoplasms | PELI1      | 0        | -46.465923  | * |
| 1810 | Malignant Neoplasms | WASF2      | 0        | -43.582996  | * |
| 1811 | Malignant Neoplasms | CDADC1     | 0        | -42.793207  | * |
| 1812 | Malignant Neoplasms | TMEM43     | 0        | -39.55442   | * |
| 1813 | Malignant Neoplasms | UFSP2      | 0        | -39.012736  | * |
| 1814 | Malignant Neoplasms | TPD52L2    | 0        | -38.64877   | * |
| 1815 | Malignant Neoplasms | RHOT1      | 0        | -37.758579  | * |
| 1816 | Malignant Neoplasms | WDR74      | 0        | -35.403596  | * |
| 1817 | Malignant Neoplasms | CLCA1      | 0        | -33.172078  | * |
| 1818 | Malignant Neoplasms | SLC26A3    | 0        | -32.059519  | * |
| 1819 | Malignant Neoplasms | CD97       | 0        | -31.776763  | * |
| 1820 | Malignant Neoplasms | FOXP1      | 0        | -30.01888   | * |
| 1821 | Malignant Neoplasms | ATP10D     | 0.000282 | -27.855315  | * |
| 1822 | Malignant Neoplasms | FAM134C    | 0        | -26.248413  | * |
| 1823 | Malignant Neoplasms | PAFAH1B2   | 0        | -24.078481  | * |
| 1824 | Malignant Neoplasms | EIF2C2     | 0        | -23.573257  | * |
| 1825 | Malignant Neoplasms | U2AF1      | 0        | -21.809927  | * |
| 1826 | Malignant Neoplasms | ADH1C      | 0        | -17.399607  | * |
| 1827 | Malignant Neoplasms | GUCA2A     | 0        | -16.294008  | * |
| 1828 | Malignant Neoplasms | CA2        | 0        | -16.253863  | * |
| 1829 | Malignant Neoplasms | RSL1D1     | 0        | -16.1776    | * |
| 1830 | Malignant Neoplasms | FAM55D     | 0        | -15.875662  | * |
| 1831 | Malignant Neoplasms | AMPD2      | 0        | -15.760984  | * |
| 1832 | Malignant Neoplasms | AKT2       | 0        | -15.115608  | * |
| 1833 | Malignant Neoplasms | HEPACAM2   | 0        | -13.446451  | * |
| 1834 | Malignant Neoplasms | AKAP5      | 0.000488 | -13.182194  | * |
| 1835 | Malignant Neoplasms | MYH11      | 0.000001 | -12.464317  | * |
| 1836 | Malignant Neoplasms | FCGBP      | 0        | -11.435381  | * |
| 1837 | Malignant Neoplasms | CBS        | 0.000649 | -10.364884  | * |
| 1838 | Malignant Neoplasms | JMJD6      | 0        | -10.33527   | * |
| 1839 | Malignant Neoplasms | IGJ        | 0        | -9.782349   | * |
| 1840 | Malignant Neoplasms | PIGR       | 0.00014  | -8.779625   | * |
| 1841 | Malignant Neoplasms | ABCA5      | 0.00005  | -8.236745   | * |
| 1842 | Malignant Neoplasms | PTGDR      | 0        | -8.086832   | * |
| 1843 | Malignant Neoplasms | PYY        | 0        | -7.608405   | * |
| 1844 | Malignant Neoplasms | LDLRAD3    | 0.000538 | -7.493235   | * |
| 1845 | Malignant Neoplasms | CA12       | 0.000136 | -5.903099   | * |
| 1846 | Malignant Neoplasms | ADAMDEC1   | 0        | -5.125187   | * |
| 1847 | Malignant Neoplasms | CHGA       | 0        | -4.56489    | * |
| 1848 | Malignant Neoplasms | ST6GALNAC1 | 0        | -4.4897     | * |



|      |                     |          |          |           |   |
|------|---------------------|----------|----------|-----------|---|
| 1849 | Malignant Neoplasms | SLC16A9  | 0.00274  | -4.44136  | * |
| 1850 | Malignant Neoplasms | VSIG2    | 0.000043 | -4.221688 | * |
| 1851 | Malignant Neoplasms | ITLN1    | 0        | -3.790869 | * |
| 1852 | Malignant Neoplasms | PLA2G10  | 0        | -3.722207 | * |
| 1853 | Malignant Neoplasms | TSPAN1   | 0.000001 | -3.277753 | * |
| 1854 | Malignant Neoplasms | PLAC8    | 0        | -3.158613 | * |
| 1855 | Malignant Neoplasms | PADI2    | 0        | -3.074963 | * |
| 1856 | Malignant Neoplasms | ETFDH    | 0.000246 | -2.961829 | * |
| 1857 | Malignant Neoplasms | PDCD4    | 0        | -2.945796 | * |
| 1858 | Malignant Neoplasms | HIGD1A   | 0        | -2.895566 | * |
| 1859 | Malignant Neoplasms | ITM2C    | 0.000001 | -2.872164 | * |
| 1860 | Malignant Neoplasms | C6orf105 | 0.000115 | -2.77523  | * |
| 1861 | Malignant Neoplasms | ENTPD5   | 0        | -2.665119 | * |
| 1862 | Malignant Neoplasms | CAPN9    | 0.000016 | -2.643441 | * |
| 1863 | Malignant Neoplasms | TP53I3   | 0.003331 | -2.596453 | * |
| 1864 | Malignant Neoplasms | PDE4D    | 0        | -2.490553 | * |
| 1865 | Malignant Neoplasms | FOXF2    | 0        | -2.48074  | * |
| 1866 | Malignant Neoplasms | PLCE1    | 0        | -2.457619 | * |
| 1867 | Malignant Neoplasms | ABP1     | 0.000179 | -2.385219 | * |
| 1868 | Malignant Neoplasms | PRKACB   | 0        | -2.333442 | * |
| 1869 | Malignant Neoplasms | MYO1A    | 0.000642 | -2.309044 | * |
| 1870 | Malignant Neoplasms | BCAS1    | 0.000006 | -2.292699 | * |
| 1871 | Malignant Neoplasms | SCNN1B   | 0.000177 | -2.287546 | * |
| 1872 | Malignant Neoplasms | METTL7A  | 0        | -2.279117 | * |
| 1873 | Malignant Neoplasms | FAM46C   | 0.000021 | -2.273251 | * |
| 1874 | Malignant Neoplasms | FRZB     | 0.000071 | -2.263728 | * |
| 1875 | Malignant Neoplasms | BTNL3    | 0.000071 | -2.24713  | * |
| 1876 | Malignant Neoplasms | ACAD10   | 0.000112 | -2.180166 | * |
| 1877 | Malignant Neoplasms | EDIL3    | 0        | -2.146757 | * |
| 1878 | Malignant Neoplasms | LPAR1    | 0        | -2.101231 | * |
| 1879 | Malignant Neoplasms | SEMA6A   | 0        | -2.093876 | * |
| 1880 | Malignant Neoplasms | LGALS4   | 0.000004 | -2.055385 | * |
| 1881 | Malignant Neoplasms | ZNF282   | 0        | 2.036182  | * |
| 1882 | Malignant Neoplasms | SET      | 0        | 2.042096  | * |
| 1883 | Malignant Neoplasms | CDK4     | 0        | 2.062929  | * |
| 1884 | Malignant Neoplasms | STT3A    | 0        | 2.077468  | * |
| 1885 | Malignant Neoplasms | ENO1     | 0.000002 | 2.078688  | * |
| 1886 | Malignant Neoplasms | RUVBL2   | 0        | 2.080554  | * |
| 1887 | Malignant Neoplasms | FANCE    | 0.005681 | 2.118416  | * |
| 1888 | Malignant Neoplasms | RNH1     | 0.000316 | 2.124698  | * |
| 1889 | Malignant Neoplasms | C22orf29 | 0        | 2.132896  | * |
| 1890 | Malignant Neoplasms | ZNF526   | 0.005925 | 2.162342  | * |
| 1891 | Malignant Neoplasms | PDZD2    | 0        | 2.185247  | * |
| 1892 | Malignant Neoplasms | CPSF4    | 0.000711 | 2.187018  | * |
| 1893 | Malignant Neoplasms | RAN      | 0        | 2.207012  | * |
| 1894 | Malignant Neoplasms | RHEBL1   | 0.005681 | 2.261905  | * |
| 1895 | Malignant Neoplasms | RPS19BP1 | 0.003331 | 2.26466   | * |
| 1896 | Malignant Neoplasms | FUT8     | 0        | 2.267452  | * |
| 1897 | Malignant Neoplasms | PITX1    | 0.000001 | 2.26755   | * |
| 1898 | Malignant Neoplasms | AARSD1   | 0.00613  | 2.270759  | * |

|      |                     |          |          |          |   |
|------|---------------------|----------|----------|----------|---|
| 1899 | Malignant Neoplasms | KIF20A   | 0        | 2.295043 | * |
| 1900 | Malignant Neoplasms | ODF2     | 0.005925 | 2.309888 | * |
| 1901 | Malignant Neoplasms | CBFB     | 0        | 2.334836 | * |
| 1902 | Malignant Neoplasms | CDC42EP1 | 0.000001 | 2.339437 | * |
| 1903 | Malignant Neoplasms | DVL2     | 0.004792 | 2.341063 | * |
| 1904 | Malignant Neoplasms | MED20    | 0.005681 | 2.355722 | * |
| 1905 | Malignant Neoplasms | SEH1L    | 0.004518 | 2.360705 | * |
| 1906 | Malignant Neoplasms | VDAC3    | 0.004518 | 2.387827 | * |
| 1907 | Malignant Neoplasms | ITIH2    | 0        | 2.398352 | * |
| 1908 | Malignant Neoplasms | LY6G6D   | 0        | 2.400382 | * |
| 1909 | Malignant Neoplasms | NOP56    | 0.000001 | 2.40229  | * |
| 1910 | Malignant Neoplasms | CASC3    | 0.005681 | 2.403027 | * |
| 1911 | Malignant Neoplasms | TEAD3    | 0.000061 | 2.404121 | * |
| 1912 | Malignant Neoplasms | TMEM99   | 0.004518 | 2.45     | * |
| 1913 | Malignant Neoplasms | DHX57    | 0.004792 | 2.473856 | * |
| 1914 | Malignant Neoplasms | LIPE     | 0.006116 | 2.478632 | * |
| 1915 | Malignant Neoplasms | VAR5     | 0        | 2.490948 | * |
| 1916 | Malignant Neoplasms | DDX55    | 0.004661 | 2.49934  | * |
| 1917 | Malignant Neoplasms | UBQLN1   | 0.004661 | 2.508627 | * |
| 1918 | Malignant Neoplasms | AP2M1    | 0.004792 | 2.519507 | * |
| 1919 | Malignant Neoplasms | LTBP2    | 0        | 2.53017  | * |
| 1920 | Malignant Neoplasms | INTS5    | 0.004661 | 2.532124 | * |
| 1921 | Malignant Neoplasms | DHX30    | 0.003998 | 2.555366 | * |
| 1922 | Malignant Neoplasms | KIAA1468 | 0.000649 | 2.560686 | * |
| 1923 | Malignant Neoplasms | SNRNP48  | 0.004094 | 2.563389 | * |
| 1924 | Malignant Neoplasms | CDC6     | 0        | 2.585624 | * |
| 1925 | Malignant Neoplasms | AHCY     | 0.000002 | 2.587594 | * |
| 1926 | Malignant Neoplasms | GSK3A    | 0.00274  | 2.598728 | * |
| 1927 | Malignant Neoplasms | RUVBL1   | 0        | 2.600979 | * |
| 1928 | Malignant Neoplasms | BAT1     | 0.004146 | 2.612366 | * |
| 1929 | Malignant Neoplasms | DIABLO   | 0.004661 | 2.621987 | * |
| 1930 | Malignant Neoplasms | WSB2     | 0.004392 | 2.622514 | * |
| 1931 | Malignant Neoplasms | ENC1     | 0        | 2.6297   | * |
| 1932 | Malignant Neoplasms | EEPD1    | 0        | 2.633427 | * |
| 1933 | Malignant Neoplasms | FGD5     | 0        | 2.646435 | * |
| 1934 | Malignant Neoplasms | FAM188B  | 0        | 2.650885 | * |
| 1935 | Malignant Neoplasms | SLC25A15 | 0.005681 | 2.654579 | * |
| 1936 | Malignant Neoplasms | RHBDF1   | 0.000215 | 2.662688 | * |
| 1937 | Malignant Neoplasms | POLDIP2  | 0.003716 | 2.671356 | * |
| 1938 | Malignant Neoplasms | ADSL     | 0.005568 | 2.705135 | * |
| 1939 | Malignant Neoplasms | C7orf68  | 0.000001 | 2.713761 | * |
| 1940 | Malignant Neoplasms | RFC3     | 0        | 2.720527 | * |
| 1941 | Malignant Neoplasms | TOP1MT   | 0        | 2.723722 | * |
| 1942 | Malignant Neoplasms | TCOF1    | 0        | 2.727922 | * |
| 1943 | Malignant Neoplasms | ZNF74    | 0.004146 | 2.735369 | * |
| 1944 | Malignant Neoplasms | TFAP4    | 0.005681 | 2.735507 | * |
| 1945 | Malignant Neoplasms | FAM136A  | 0.005777 | 2.752235 | * |
| 1946 | Malignant Neoplasms | EIF5A    | 0        | 2.754041 | * |
| 1947 | Malignant Neoplasms | GPR176   | 0        | 2.759087 | * |
| 1948 | Malignant Neoplasms | MLF2     | 0.000543 | 2.764901 | * |

|      |                     |          |          |          |   |
|------|---------------------|----------|----------|----------|---|
| 1949 | Malignant Neoplasms | DDX54    | 0.003115 | 2.767251 | * |
| 1950 | Malignant Neoplasms | MEN1     | 0.005391 | 2.787758 | * |
| 1951 | Malignant Neoplasms | ZW10     | 0.004351 | 2.787995 | * |
| 1952 | Malignant Neoplasms | TMEM222  | 0.004146 | 2.815126 | * |
| 1953 | Malignant Neoplasms | SORD     | 0        | 2.867057 | * |
| 1954 | Malignant Neoplasms | HABP2    | 0        | 2.896576 | * |
| 1955 | Malignant Neoplasms | AP3M1    | 0.004518 | 2.900102 | * |
| 1956 | Malignant Neoplasms | DCPS     | 0.005681 | 2.902001 | * |
| 1957 | Malignant Neoplasms | PDIA6    | 0.004518 | 2.90568  | * |
| 1958 | Malignant Neoplasms | MRPL37   | 0.003331 | 2.913286 | * |
| 1959 | Malignant Neoplasms | TRAPPC4  | 0.004101 | 2.913919 | * |
| 1960 | Malignant Neoplasms | EDEM2    | 0.00581  | 2.927928 | * |
| 1961 | Malignant Neoplasms | GRB10    | 0        | 2.927995 | * |
| 1962 | Malignant Neoplasms | VPS4A    | 0.005681 | 2.938373 | * |
| 1963 | Malignant Neoplasms | ALG3     | 0.005978 | 2.939251 | * |
| 1964 | Malignant Neoplasms | NUMBL    | 0.004222 | 2.960859 | * |
| 1965 | Malignant Neoplasms | TMEM39B  | 0.004518 | 2.961722 | * |
| 1966 | Malignant Neoplasms | SLC41A1  | 0        | 2.968926 | * |
| 1967 | Malignant Neoplasms | PPEF1    | 0        | 2.974042 | * |
| 1968 | Malignant Neoplasms | SHMT2    | 0        | 2.982462 | * |
| 1969 | Malignant Neoplasms | SLC25A39 | 0.002827 | 3.001813 | * |
| 1970 | Malignant Neoplasms | GNS      | 0.004518 | 3.015521 | * |
| 1971 | Malignant Neoplasms | EXTL2    | 0.004146 | 3.033154 | * |
| 1972 | Malignant Neoplasms | M6PR     | 0.005681 | 3.035629 | * |
| 1973 | Malignant Neoplasms | SGIP1    | 0        | 3.035792 | * |
| 1974 | Malignant Neoplasms | SOX4     | 0        | 3.075368 | * |
| 1975 | Malignant Neoplasms | PSMF1    | 0.005681 | 3.094299 | * |
| 1976 | Malignant Neoplasms | TEAD4    | 0        | 3.121837 | * |
| 1977 | Malignant Neoplasms | GDPD5    | 0        | 3.12273  | * |
| 1978 | Malignant Neoplasms | KIAA1257 | 0        | 3.140853 | * |
| 1979 | Malignant Neoplasms | BUB3     | 0.004183 | 3.142091 | * |
| 1980 | Malignant Neoplasms | DDX50    | 0.002827 | 3.14262  | * |
| 1981 | Malignant Neoplasms | ZRANB1   | 0.005681 | 3.146275 | * |
| 1982 | Malignant Neoplasms | PWP2     | 0.004792 | 3.149072 | * |
| 1983 | Malignant Neoplasms | NANP     | 0.004255 | 3.185112 | * |
| 1984 | Malignant Neoplasms | SEC14L2  | 0        | 3.188415 | * |
| 1985 | Malignant Neoplasms | DNAH5    | 0        | 3.204015 | * |
| 1986 | Malignant Neoplasms | RPUSD4   | 0.00274  | 3.207434 | * |
| 1987 | Malignant Neoplasms | PDE10A   | 0        | 3.215748 | * |
| 1988 | Malignant Neoplasms | TRPS1    | 0.000313 | 3.223952 | * |
| 1989 | Malignant Neoplasms | AACS     | 0.005142 | 3.239776 | * |
| 1990 | Malignant Neoplasms | CA9      | 0        | 3.241118 | * |
| 1991 | Malignant Neoplasms | COPS7A   | 0.00274  | 3.259742 | * |
| 1992 | Malignant Neoplasms | GRAMD1B  | 0        | 3.261789 | * |
| 1993 | Malignant Neoplasms | CDKN2A   | 0        | 3.262812 | * |
| 1994 | Malignant Neoplasms | RNF32    | 0        | 3.26672  | * |
| 1995 | Malignant Neoplasms | GANAB    | 0.00274  | 3.283045 | * |
| 1996 | Malignant Neoplasms | KATNB1   | 0.005681 | 3.285481 | * |
| 1997 | Malignant Neoplasms | SLC9A7   | 0        | 3.2869   | * |
| 1998 | Malignant Neoplasms | OSBPL10  | 0.004146 | 3.287311 | * |

|      |                     |         |          |          |   |
|------|---------------------|---------|----------|----------|---|
| 1999 | Malignant Neoplasms | SSRP1   | 0.004661 | 3.296498 | * |
| 2000 | Malignant Neoplasms | SRPR    | 0.005681 | 3.296962 | * |
| 2001 | Malignant Neoplasms | ITGA11  | 0        | 3.303535 | * |
| 2002 | Malignant Neoplasms | GMPS    | 0.004518 | 3.311997 | * |
| 2003 | Malignant Neoplasms | FIBP    | 0.002702 | 3.321244 | * |
| 2004 | Malignant Neoplasms | ADAMTS2 | 0        | 3.332996 | * |
| 2005 | Malignant Neoplasms | NOC4L   | 0.003716 | 3.340548 | * |
| 2006 | Malignant Neoplasms | RCC2    | 0.005681 | 3.350207 | * |
| 2007 | Malignant Neoplasms | P4HA3   | 0        | 3.358196 | * |
| 2008 | Malignant Neoplasms | RPN2    | 0.00274  | 3.377154 | * |
| 2009 | Malignant Neoplasms | PA2G4   | 0.00274  | 3.385057 | * |
| 2010 | Malignant Neoplasms | BMP7    | 0        | 3.38987  | * |
| 2011 | Malignant Neoplasms | BFSP1   | 0        | 3.394537 | * |
| 2012 | Malignant Neoplasms | NOP14   | 0.004661 | 3.39778  | * |
| 2013 | Malignant Neoplasms | LPCAT1  | 0        | 3.398193 | * |
| 2014 | Malignant Neoplasms | KPNB1   | 0.004792 | 3.418362 | * |
| 2015 | Malignant Neoplasms | PTPRH   | 0.000291 | 3.466    | * |
| 2016 | Malignant Neoplasms | EZH2    | 0.005681 | 3.483052 | * |
| 2017 | Malignant Neoplasms | TCF7    | 0        | 3.484109 | * |
| 2018 | Malignant Neoplasms | LASS2   | 0.00613  | 3.511735 | * |
| 2019 | Malignant Neoplasms | NAT10   | 0.004518 | 3.51483  | * |
| 2020 | Malignant Neoplasms | IRAK2   | 0        | 3.526085 | * |
| 2021 | Malignant Neoplasms | NEU3    | 0.005925 | 3.553583 | * |
| 2022 | Malignant Neoplasms | SYNGAP1 | 0.0052   | 3.554779 | * |
| 2023 | Malignant Neoplasms | C13orf3 | 0        | 3.560351 | * |
| 2024 | Malignant Neoplasms | ADAMTS6 | 0        | 3.581777 | * |
| 2025 | Malignant Neoplasms | SF3B3   | 0.005501 | 3.613169 | * |
| 2026 | Malignant Neoplasms | GLS2    | 0        | 3.614199 | * |
| 2027 | Malignant Neoplasms | DPF2    | 0.005681 | 3.620165 | * |
| 2028 | Malignant Neoplasms | HIAT1   | 0.005479 | 3.620712 | * |
| 2029 | Malignant Neoplasms | TRIM28  | 0.004518 | 3.638133 | * |
| 2030 | Malignant Neoplasms | PRMT5   | 0.003998 | 3.657105 | * |
| 2031 | Malignant Neoplasms | G6PD    | 0.00274  | 3.692506 | * |
| 2032 | Malignant Neoplasms | USP5    | 0.003716 | 3.700412 | * |
| 2033 | Malignant Neoplasms | CSDA    | 0.005077 | 3.70852  | * |
| 2034 | Malignant Neoplasms | RGNEF   | 0.000156 | 3.713951 | * |
| 2035 | Malignant Neoplasms | SIM2    | 0        | 3.727166 | * |
| 2036 | Malignant Neoplasms | NKD1    | 0        | 3.731564 | * |
| 2037 | Malignant Neoplasms | ARMC6   | 0.004518 | 3.744797 | * |
| 2038 | Malignant Neoplasms | ALDH3B2 | 0        | 3.771741 | * |
| 2039 | Malignant Neoplasms | LUZP6   | 0.004518 | 3.782718 | * |
| 2040 | Malignant Neoplasms | ECT2    | 0        | 3.796085 | * |
| 2041 | Malignant Neoplasms | HS6ST2  | 0        | 3.806945 | * |
| 2042 | Malignant Neoplasms | PREB    | 0.004956 | 3.832184 | * |
| 2043 | Malignant Neoplasms | TBX20   | 0        | 3.863409 | * |
| 2044 | Malignant Neoplasms | HAPLN3  | 0        | 3.864986 | * |
| 2045 | Malignant Neoplasms | PHF16   | 0.00274  | 3.915459 | * |
| 2046 | Malignant Neoplasms | NMT1    | 0.005681 | 3.920484 | * |
| 2047 | Malignant Neoplasms | LEPRE1  | 0        | 3.929111 | * |
| 2048 | Malignant Neoplasms | FAM150A | 0        | 3.955729 | * |

|      |                     |            |          |          |   |
|------|---------------------|------------|----------|----------|---|
| 2049 | Malignant Neoplasms | CSGALNACT1 | 0        | 3.983069 | * |
| 2050 | Malignant Neoplasms | POLD2      | 0.005681 | 3.983102 | * |
| 2051 | Malignant Neoplasms | VWA2       | 0        | 3.985745 | * |
| 2052 | Malignant Neoplasms | KLHL11     | 0.004146 | 4.02168  | * |
| 2053 | Malignant Neoplasms | ESYT1      | 0.004518 | 4.039931 | * |
| 2054 | Malignant Neoplasms | ARNTL2     | 0        | 4.06639  | * |
| 2055 | Malignant Neoplasms | LRRC34     | 0        | 4.101056 | * |
| 2056 | Malignant Neoplasms | PJA1       | 0        | 4.103211 | * |
| 2057 | Malignant Neoplasms | TXNDC5     | 0.003331 | 4.108174 | * |
| 2058 | Malignant Neoplasms | GART       | 0.004661 | 4.111965 | * |
| 2059 | Malignant Neoplasms | IL24       | 0        | 4.120371 | * |
| 2060 | Malignant Neoplasms | UNC119B    | 0.005142 | 4.129353 | * |
| 2061 | Malignant Neoplasms | GAS2       | 0        | 4.130475 | * |
| 2062 | Malignant Neoplasms | IPO5       | 0.000543 | 4.148212 | * |
| 2063 | Malignant Neoplasms | SMYD5      | 0.005205 | 4.192783 | * |
| 2064 | Malignant Neoplasms | EFTUD2     | 0.004518 | 4.19284  | * |
| 2065 | Malignant Neoplasms | PTP4A3     | 0        | 4.198752 | * |
| 2066 | Malignant Neoplasms | NT5C3L     | 0.004078 | 4.209745 | * |
| 2067 | Malignant Neoplasms | ACSL6      | 0        | 4.21929  | * |
| 2068 | Malignant Neoplasms | NSUN5      | 0.00274  | 4.223239 | * |
| 2069 | Malignant Neoplasms | C1orf135   | 0        | 4.242459 | * |
| 2070 | Malignant Neoplasms | GPN3       | 0.005925 | 4.245142 | * |
| 2071 | Malignant Neoplasms | SNTB1      | 0        | 4.273359 | * |
| 2072 | Malignant Neoplasms | OGFOD1     | 0.002827 | 4.274142 | * |
| 2073 | Malignant Neoplasms | TNFSF11    | 0        | 4.302181 | * |
| 2074 | Malignant Neoplasms | ZNF473     | 0.000543 | 4.320616 | * |
| 2075 | Malignant Neoplasms | KLC2       | 0.005799 | 4.347443 | * |
| 2076 | Malignant Neoplasms | MTHFD1L    | 0        | 4.380449 | * |
| 2077 | Malignant Neoplasms | STC1       | 0        | 4.395318 | * |
| 2078 | Malignant Neoplasms | ODAM       | 0        | 4.447008 | * |
| 2079 | Malignant Neoplasms | WDR66      | 0        | 4.447168 | * |
| 2080 | Malignant Neoplasms | MORN4      | 0.004078 | 4.44856  | * |
| 2081 | Malignant Neoplasms | CSF2       | 0        | 4.465932 | * |
| 2082 | Malignant Neoplasms | COQ10A     | 0.00274  | 4.468316 | * |
| 2083 | Malignant Neoplasms | NONO       | 0.002827 | 4.4933   | * |
| 2084 | Malignant Neoplasms | PAH        | 0        | 4.501848 | * |
| 2085 | Malignant Neoplasms | TOMM34     | 0.004392 | 4.503749 | * |
| 2086 | Malignant Neoplasms | LOXL2      | 0        | 4.528196 | * |
| 2087 | Malignant Neoplasms | NEK5       | 0        | 4.545746 | * |
| 2088 | Malignant Neoplasms | CD81       | 0.00447  | 4.590045 | * |
| 2089 | Malignant Neoplasms | OLFML2B    | 0        | 4.638492 | * |
| 2090 | Malignant Neoplasms | MMP11      | 0        | 4.677703 | * |
| 2091 | Malignant Neoplasms | NOC3L      | 0.005681 | 4.69697  | * |
| 2092 | Malignant Neoplasms | GRHL1      | 0        | 4.760864 | * |
| 2093 | Malignant Neoplasms | FTSJ1      | 0.004078 | 4.767414 | * |
| 2094 | Malignant Neoplasms | LDHB       | 0.002827 | 4.81117  | * |
| 2095 | Malignant Neoplasms | PLAU       | 0        | 4.841344 | * |
| 2096 | Malignant Neoplasms | DTD1       | 0.005681 | 4.857716 | * |
| 2097 | Malignant Neoplasms | DIO2       | 0        | 4.877771 | * |
| 2098 | Malignant Neoplasms | XPO5       | 0.00184  | 4.886191 | * |



|      |                     |          |          |           |   |
|------|---------------------|----------|----------|-----------|---|
| 2099 | Malignant Neoplasms | G6PC3    | 0.00274  | 4.886922  | * |
| 2100 | Malignant Neoplasms | HCN1     | 0        | 4.993712  | * |
| 2101 | Malignant Neoplasms | ICOS     | 0        | 5.13095   | * |
| 2102 | Malignant Neoplasms | COLEC11  | 0        | 5.278582  | * |
| 2103 | Malignant Neoplasms | CYP39A1  | 0        | 5.382667  | * |
| 2104 | Malignant Neoplasms | CDH6     | 0        | 5.400039  | * |
| 2105 | Malignant Neoplasms | TEX10    | 0.00274  | 5.426288  | * |
| 2106 | Malignant Neoplasms | GRIN2B   | 0        | 5.605313  | * |
| 2107 | Malignant Neoplasms | PDPN     | 0        | 5.623195  | * |
| 2108 | Malignant Neoplasms | TSPYL2   | 0.00274  | 5.747126  | * |
| 2109 | Malignant Neoplasms | EGFL6    | 0        | 5.80168   | * |
| 2110 | Malignant Neoplasms | ANGPT2   | 0        | 5.811083  | * |
| 2111 | Malignant Neoplasms | TMEM185B | 0.003716 | 5.837496  | * |
| 2112 | Malignant Neoplasms | HNF1B    | 0.000037 | 5.861257  | * |
| 2113 | Malignant Neoplasms | HSPA13   | 0.005681 | 6.341991  | * |
| 2114 | Malignant Neoplasms | ADAMTS12 | 0        | 6.346981  | * |
| 2115 | Malignant Neoplasms | YARS     | 0.00274  | 6.348424  | * |
| 2116 | Malignant Neoplasms | SLC7A5   | 0        | 6.486225  | * |
| 2117 | Malignant Neoplasms | KRT80    | 0        | 6.582092  | * |
| 2118 | Malignant Neoplasms | MMP12    | 0        | 6.617377  | * |
| 2119 | Malignant Neoplasms | JUB      | 0        | 6.6753    | * |
| 2120 | Malignant Neoplasms | DPP7     | 0.006116 | 6.682502  | * |
| 2121 | Malignant Neoplasms | MFAP2    | 0        | 6.758639  | * |
| 2122 | Malignant Neoplasms | COL11A1  | 0        | 7.090537  | * |
| 2123 | Malignant Neoplasms | SPP1     | 0        | 7.465531  | * |
| 2124 | Malignant Neoplasms | GRPEL2   | 0.004661 | 7.668546  | * |
| 2125 | Malignant Neoplasms | COL10A1  | 0        | 7.669827  | * |
| 2126 | Malignant Neoplasms | LEMD1    | 0        | 7.698407  | * |
| 2127 | Malignant Neoplasms | DAPP1    | 0.000647 | 7.985603  | * |
| 2128 | Malignant Neoplasms | MTHFD2   | 0.004146 | 8.186467  | * |
| 2129 | Malignant Neoplasms | INHBA    | 0        | 8.535336  | * |
| 2130 | Malignant Neoplasms | ESM1     | 0        | 8.550091  | * |
| 2131 | Malignant Neoplasms | KAL1     | 0        | 8.67666   | * |
| 2132 | Malignant Neoplasms | ADAM12   | 0        | 9.08807   | * |
| 2133 | Malignant Neoplasms | ASNS     | 0.005077 | 9.20214   | * |
| 2134 | Malignant Neoplasms | ACCN2    | 0.004094 | 10.236928 | * |
| 2135 | Malignant Neoplasms | KIAA1199 | 0        | 10.5275   | * |
| 2136 | Malignant Neoplasms | CHI3L1   | 0        | 10.717129 | * |
| 2137 | Malignant Neoplasms | BMP2     | 0.000377 | 10.915956 | * |
| 2138 | Malignant Neoplasms | MSX2     | 0        | 11.332886 | * |
| 2139 | Malignant Neoplasms | FOXQ1    | 0.00581  | 11.687135 | * |
| 2140 | Malignant Neoplasms | SLC39A6  | 0.006116 | 11.756536 | * |
| 2141 | Malignant Neoplasms | SLC3A2   | 0.004792 | 14.29764  | * |
| 2142 | Malignant Neoplasms | EFNA5    | 0.000114 | 15.739517 | * |
| 2143 | Malignant Neoplasms | CDH3     | 0        | 16.214804 | * |
| 2144 | Malignant Neoplasms | FAP      | 0        | 18.387175 | * |
| 2145 | Malignant Neoplasms | MMP3     | 0        | 19.590228 | * |
| 2146 | Malignant Neoplasms | MMP7     | 0        | 32.841944 | * |
| 2147 | Malignant Neoplasms | APOH     | 0.000095 | 45.459999 | * |
| 2148 | Malignant Neoplasms | FXVD5    | 0.004698 | 64.324786 | * |

|      |                          |          |          |            |   |
|------|--------------------------|----------|----------|------------|---|
| 2149 | Malignant Neoplasms      | AGR3     | 0.000067 | 99.473247  | * |
| 2150 | Malignant Neoplasms      | AGR2     | 0.000047 | 239.538376 | * |
| 2151 | Malignant tumor of colon | BCAS1    | 0.004661 | -17.453571 | * |
| 2152 | Malignant tumor of colon | AKAP5    | 0.000543 | -7.672727  | * |
| 2153 | Malignant tumor of colon | SLC16A9  | 0.00274  | -4.44136   | * |
| 2154 | Malignant tumor of colon | TP53I3   | 0.003331 | -2.596453  | * |
| 2155 | Malignant tumor of colon | FANCE    | 0.005681 | 2.118416   | * |
| 2156 | Malignant tumor of colon | REXO2    | 0.005681 | 2.160419   | * |
| 2157 | Malignant tumor of colon | ZNF526   | 0.005925 | 2.162342   | * |
| 2158 | Malignant tumor of colon | RHEBL1   | 0.005681 | 2.261905   | * |
| 2159 | Malignant tumor of colon | RPS19BP1 | 0.003331 | 2.26466    | * |
| 2160 | Malignant tumor of colon | AARSD1   | 0.00613  | 2.270759   | * |
| 2161 | Malignant tumor of colon | ODF2     | 0.005925 | 2.309888   | * |
| 2162 | Malignant tumor of colon | DVL2     | 0.004792 | 2.341063   | * |
| 2163 | Malignant tumor of colon | MED20    | 0.005681 | 2.355722   | * |
| 2164 | Malignant tumor of colon | SEH1L    | 0.004518 | 2.360705   | * |
| 2165 | Malignant tumor of colon | VDAC3    | 0.004518 | 2.387827   | * |
| 2166 | Malignant tumor of colon | CASC3    | 0.005681 | 2.403027   | * |
| 2167 | Malignant tumor of colon | TMEM99   | 0.004518 | 2.45       | * |
| 2168 | Malignant tumor of colon | DHX57    | 0.004792 | 2.473856   | * |
| 2169 | Malignant tumor of colon | LIPE     | 0.006116 | 2.478632   | * |
| 2170 | Malignant tumor of colon | DDX55    | 0.004661 | 2.49934    | * |
| 2171 | Malignant tumor of colon | UBQLN1   | 0.004661 | 2.508627   | * |
| 2172 | Malignant tumor of colon | AP2M1    | 0.004792 | 2.519507   | * |
| 2173 | Malignant tumor of colon | INTS5    | 0.004661 | 2.532124   | * |
| 2174 | Malignant tumor of colon | DHX30    | 0.003998 | 2.555366   | * |
| 2175 | Malignant tumor of colon | SNRNP48  | 0.004094 | 2.563389   | * |
| 2176 | Malignant tumor of colon | GSK3A    | 0.00274  | 2.598728   | * |
| 2177 | Malignant tumor of colon | BAT1     | 0.004146 | 2.612366   | * |
| 2178 | Malignant tumor of colon | DIABLO   | 0.004661 | 2.621987   | * |
| 2179 | Malignant tumor of colon | WSB2     | 0.004392 | 2.622514   | * |
| 2180 | Malignant tumor of colon | SLC25A15 | 0.005681 | 2.654579   | * |
| 2181 | Malignant tumor of colon | POLDIP2  | 0.003716 | 2.671356   | * |
| 2182 | Malignant tumor of colon | ADSL     | 0.005568 | 2.705135   | * |
| 2183 | Malignant tumor of colon | ZNF74    | 0.004146 | 2.735369   | * |
| 2184 | Malignant tumor of colon | TFAP4    | 0.005681 | 2.735507   | * |
| 2185 | Malignant tumor of colon | FAM136A  | 0.005777 | 2.752235   | * |
| 2186 | Malignant tumor of colon | MLF2     | 0.000543 | 2.764901   | * |
| 2187 | Malignant tumor of colon | DDX54    | 0.003115 | 2.767251   | * |
| 2188 | Malignant tumor of colon | MEN1     | 0.005391 | 2.787758   | * |
| 2189 | Malignant tumor of colon | ZW10     | 0.004351 | 2.787995   | * |
| 2190 | Malignant tumor of colon | RNH1     | 0.004792 | 2.804233   | * |
| 2191 | Malignant tumor of colon | TMEM222  | 0.004146 | 2.815126   | * |
| 2192 | Malignant tumor of colon | TMEM43   | 0.005925 | 2.829317   | * |
| 2193 | Malignant tumor of colon | AP3M1    | 0.004518 | 2.900102   | * |
| 2194 | Malignant tumor of colon | DCPS     | 0.005681 | 2.902001   | * |
| 2195 | Malignant tumor of colon | PDIA6    | 0.004518 | 2.90568    | * |
| 2196 | Malignant tumor of colon | MRPL37   | 0.003331 | 2.913286   | * |
| 2197 | Malignant tumor of colon | TRAPPC4  | 0.004101 | 2.913919   | * |
| 2198 | Malignant tumor of colon | EDEM2    | 0.00581  | 2.927928   | * |

|      |                          |          |          |          |   |
|------|--------------------------|----------|----------|----------|---|
| 2199 | Malignant tumor of colon | VPS4A    | 0.005681 | 2.938373 | * |
| 2200 | Malignant tumor of colon | ALG3     | 0.005978 | 2.939251 | * |
| 2201 | Malignant tumor of colon | FAM134C  | 0.005681 | 2.947311 | * |
| 2202 | Malignant tumor of colon | NUMBL    | 0.004222 | 2.960859 | * |
| 2203 | Malignant tumor of colon | TMEM39B  | 0.004518 | 2.961722 | * |
| 2204 | Malignant tumor of colon | SHMT2    | 0.001709 | 2.980376 | * |
| 2205 | Malignant tumor of colon | PAFAH1B2 | 0.004661 | 2.988591 | * |
| 2206 | Malignant tumor of colon | STT3A    | 0.00531  | 2.993854 | * |
| 2207 | Malignant tumor of colon | SLC25A39 | 0.002827 | 3.001813 | * |
| 2208 | Malignant tumor of colon | GNS      | 0.004518 | 3.015521 | * |
| 2209 | Malignant tumor of colon | EXTL2    | 0.004146 | 3.033154 | * |
| 2210 | Malignant tumor of colon | M6PR     | 0.005681 | 3.035629 | * |
| 2211 | Malignant tumor of colon | DDB1     | 0.004146 | 3.057781 | * |
| 2212 | Malignant tumor of colon | PSMF1    | 0.005681 | 3.094299 | * |
| 2213 | Malignant tumor of colon | RHOT1    | 0.005681 | 3.134272 | * |
| 2214 | Malignant tumor of colon | BUB3     | 0.004183 | 3.142091 | * |
| 2215 | Malignant tumor of colon | DDX50    | 0.002827 | 3.14262  | * |
| 2216 | Malignant tumor of colon | ZRANB1   | 0.005681 | 3.146275 | * |
| 2217 | Malignant tumor of colon | NOP56    | 0.00613  | 3.148926 | * |
| 2218 | Malignant tumor of colon | PWP2     | 0.004792 | 3.149072 | * |
| 2219 | Malignant tumor of colon | PHF20    | 0.006116 | 3.164103 | * |
| 2220 | Malignant tumor of colon | CPSF4    | 0.004078 | 3.175705 | * |
| 2221 | Malignant tumor of colon | NANP     | 0.004255 | 3.185112 | * |
| 2222 | Malignant tumor of colon | RPUSD4   | 0.00274  | 3.207434 | * |
| 2223 | Malignant tumor of colon | AACS     | 0.005142 | 3.239776 | * |
| 2224 | Malignant tumor of colon | COPS7A   | 0.00274  | 3.259742 | * |
| 2225 | Malignant tumor of colon | GANAB    | 0.00274  | 3.283045 | * |
| 2226 | Malignant tumor of colon | KATNB1   | 0.005681 | 3.285481 | * |
| 2227 | Malignant tumor of colon | OSBPL10  | 0.004146 | 3.287311 | * |
| 2228 | Malignant tumor of colon | RUVBL2   | 0.006112 | 3.290995 | * |
| 2229 | Malignant tumor of colon | SSRP1    | 0.004661 | 3.296498 | * |
| 2230 | Malignant tumor of colon | SRPR     | 0.005681 | 3.296962 | * |
| 2231 | Malignant tumor of colon | GMPS     | 0.004518 | 3.311997 | * |
| 2232 | Malignant tumor of colon | FIBP     | 0.002702 | 3.321244 | * |
| 2233 | Malignant tumor of colon | NOC4L    | 0.003716 | 3.340548 | * |
| 2234 | Malignant tumor of colon | RCC2     | 0.005681 | 3.350207 | * |
| 2235 | Malignant tumor of colon | RPN2     | 0.00274  | 3.377154 | * |
| 2236 | Malignant tumor of colon | PA2G4    | 0.00274  | 3.385057 | * |
| 2237 | Malignant tumor of colon | NOP14    | 0.004661 | 3.39778  | * |
| 2238 | Malignant tumor of colon | KPNB1    | 0.004792 | 3.418362 | * |
| 2239 | Malignant tumor of colon | PPP2CA   | 0.005558 | 3.478573 | * |
| 2240 | Malignant tumor of colon | EZH2     | 0.005681 | 3.483052 | * |
| 2241 | Malignant tumor of colon | LASS2    | 0.00613  | 3.511735 | * |
| 2242 | Malignant tumor of colon | NAT10    | 0.004518 | 3.51483  | * |
| 2243 | Malignant tumor of colon | NEU3     | 0.005925 | 3.553583 | * |
| 2244 | Malignant tumor of colon | SYNGAP1  | 0.0052   | 3.554779 | * |
| 2245 | Malignant tumor of colon | ENO1     | 0.00274  | 3.587509 | * |
| 2246 | Malignant tumor of colon | SF3B3    | 0.005501 | 3.613169 | * |
| 2247 | Malignant tumor of colon | DPF2     | 0.005681 | 3.620165 | * |
| 2248 | Malignant tumor of colon | HIAT1    | 0.005479 | 3.620712 | * |



|      |                          |          |          |          |   |
|------|--------------------------|----------|----------|----------|---|
| 2249 | Malignant tumor of colon | TRIM28   | 0.004518 | 3.638133 | * |
| 2250 | Malignant tumor of colon | PRMT5    | 0.003998 | 3.657105 | * |
| 2251 | Malignant tumor of colon | G6PD     | 0.00274  | 3.692506 | * |
| 2252 | Malignant tumor of colon | USP5     | 0.003716 | 3.700412 | * |
| 2253 | Malignant tumor of colon | CSDA     | 0.005077 | 3.70852  | * |
| 2254 | Malignant tumor of colon | ARMC6    | 0.004518 | 3.744797 | * |
| 2255 | Malignant tumor of colon | RAN      | 0.006116 | 3.745088 | * |
| 2256 | Malignant tumor of colon | LUZP6    | 0.004518 | 3.782718 | * |
| 2257 | Malignant tumor of colon | VAR5     | 0.00184  | 3.789916 | * |
| 2258 | Malignant tumor of colon | PREB     | 0.004956 | 3.832184 | * |
| 2259 | Malignant tumor of colon | RUVBL1   | 0.005681 | 3.875942 | * |
| 2260 | Malignant tumor of colon | TCF7     | 0.004146 | 3.880342 | * |
| 2261 | Malignant tumor of colon | PHF16    | 0.00274  | 3.915459 | * |
| 2262 | Malignant tumor of colon | NMT1     | 0.005681 | 3.920484 | * |
| 2263 | Malignant tumor of colon | POLD2    | 0.005681 | 3.983102 | * |
| 2264 | Malignant tumor of colon | KLHL11   | 0.004146 | 4.02168  | * |
| 2265 | Malignant tumor of colon | ESYT1    | 0.004518 | 4.039931 | * |
| 2266 | Malignant tumor of colon | TEAD4    | 0.005681 | 4.044044 | * |
| 2267 | Malignant tumor of colon | TXNDC5   | 0.003331 | 4.108174 | * |
| 2268 | Malignant tumor of colon | GART     | 0.004661 | 4.111965 | * |
| 2269 | Malignant tumor of colon | UNC119B  | 0.005142 | 4.129353 | * |
| 2270 | Malignant tumor of colon | IPO5     | 0.000543 | 4.148212 | * |
| 2271 | Malignant tumor of colon | SMYD5    | 0.005205 | 4.192783 | * |
| 2272 | Malignant tumor of colon | EFTUD2   | 0.004518 | 4.19284  | * |
| 2273 | Malignant tumor of colon | NT5C3L   | 0.004078 | 4.209745 | * |
| 2274 | Malignant tumor of colon | NSUN5    | 0.00274  | 4.223239 | * |
| 2275 | Malignant tumor of colon | GPN3     | 0.005925 | 4.245142 | * |
| 2276 | Malignant tumor of colon | OGFOD1   | 0.002827 | 4.274142 | * |
| 2277 | Malignant tumor of colon | ZNF473   | 0.000543 | 4.320616 | * |
| 2278 | Malignant tumor of colon | KLC2     | 0.005799 | 4.347443 | * |
| 2279 | Malignant tumor of colon | MORN4    | 0.004078 | 4.44856  | * |
| 2280 | Malignant tumor of colon | COQ10A   | 0.00274  | 4.468316 | * |
| 2281 | Malignant tumor of colon | NONO     | 0.002827 | 4.4933   | * |
| 2282 | Malignant tumor of colon | TOMM34   | 0.004392 | 4.503749 | * |
| 2283 | Malignant tumor of colon | NOC3L    | 0.005681 | 4.69697  | * |
| 2284 | Malignant tumor of colon | FTSJ1    | 0.004078 | 4.767414 | * |
| 2285 | Malignant tumor of colon | TPD52L2  | 0.004078 | 4.788684 | * |
| 2286 | Malignant tumor of colon | LDHB     | 0.002827 | 4.81117  | * |
| 2287 | Malignant tumor of colon | DTD1     | 0.005681 | 4.857716 | * |
| 2288 | Malignant tumor of colon | XPO5     | 0.00184  | 4.886191 | * |
| 2289 | Malignant tumor of colon | G6PC3    | 0.00274  | 4.886922 | * |
| 2290 | Malignant tumor of colon | WDR74    | 0.004146 | 5.075321 | * |
| 2291 | Malignant tumor of colon | AHCY     | 0.004518 | 5.223647 | * |
| 2292 | Malignant tumor of colon | TEX10    | 0.00274  | 5.426288 | * |
| 2293 | Malignant tumor of colon | CIRH1A   | 0.00274  | 5.542027 | * |
| 2294 | Malignant tumor of colon | TSPYL2   | 0.00274  | 5.747126 | * |
| 2295 | Malignant tumor of colon | TMEM185B | 0.003716 | 5.837496 | * |
| 2296 | Malignant tumor of colon | CDK4     | 0.004518 | 6.24989  | * |
| 2297 | Malignant tumor of colon | HSPA13   | 0.005681 | 6.341991 | * |
| 2298 | Malignant tumor of colon | YARS     | 0.00274  | 6.348424 | * |

|      |                          |          |          |            |   |
|------|--------------------------|----------|----------|------------|---|
| 2299 | Malignant tumor of colon | DPP7     | 0.006116 | 6.682502   | * |
| 2300 | Malignant tumor of colon | SIM2     | 0.0052   | 7.317708   | * |
| 2301 | Malignant tumor of colon | GRPEL2   | 0.004661 | 7.668546   | * |
| 2302 | Malignant tumor of colon | MTHFD2   | 0.004146 | 8.186467   | * |
| 2303 | Malignant tumor of colon | CD81     | 0.004661 | 8.248565   | * |
| 2304 | Malignant tumor of colon | ASNS     | 0.005077 | 9.20214    | * |
| 2305 | Malignant tumor of colon | ACCN2    | 0.004094 | 10.236928  | * |
| 2306 | Malignant tumor of colon | GRB10    | 0.003716 | 10.421296  | * |
| 2307 | Malignant tumor of colon | LDLRAD3  | 0.00613  | 11.487923  | * |
| 2308 | Malignant tumor of colon | FOXQ1    | 0.00581  | 11.687135  | * |
| 2309 | Malignant tumor of colon | SLC39A6  | 0.006116 | 11.756536  | * |
| 2310 | Malignant tumor of colon | SLC3A2   | 0.004792 | 14.29764   | * |
| 2311 | Malignant tumor of colon | PITX1    | 0.004952 | 22.45      | * |
| 2312 | Malignant tumor of colon | HS6ST2   | 0.004518 | 24.301075  | * |
| 2313 | Malignant tumor of colon | FXYD5    | 0.004698 | 64.324786  | * |
| 2314 | Mutant                   | TGFBI    | 0        | -3.000013  | * |
| 2315 | Mutant                   | FOXA2    | 0.000003 | 18.266987  | * |
| 2316 | Mutant                   | TM4SF1   | 0.000002 | 117.507367 | * |
| 2317 | Neoplasm                 | PYY      | 0        | -32.95913  | * |
| 2318 | Neoplasm                 | FAM92A1  | 0.004874 | -22.777354 | * |
| 2319 | Neoplasm                 | SCGN     | 0        | -21.371687 | * |
| 2320 | Neoplasm                 | ITGA5    | 0.000005 | -20.20304  | * |
| 2321 | Neoplasm                 | BEST4    | 0        | -18.781625 | * |
| 2322 | Neoplasm                 | CA7      | 0        | -17.501116 | * |
| 2323 | Neoplasm                 | TPH1     | 0        | -16.890323 | * |
| 2324 | Neoplasm                 | GUCA2A   | 0        | -16.294008 | * |
| 2325 | Neoplasm                 | CLCA1    | 0        | -13.979504 | * |
| 2326 | Neoplasm                 | FLJ21511 | 0        | -13.766835 | * |
| 2327 | Neoplasm                 | SLC26A3  | 0        | -13.167276 | * |
| 2328 | Neoplasm                 | PKIB     | 0        | -12.911139 | * |
| 2329 | Neoplasm                 | AQP8     | 0        | -12.860219 | * |
| 2330 | Neoplasm                 | EPDR1    | 0.00804  | -12.748749 | * |
| 2331 | Neoplasm                 | MYH11    | 0.000001 | -12.464317 | * |
| 2332 | Neoplasm                 | SLC26A2  | 0        | -11.558375 | * |
| 2333 | Neoplasm                 | HSPA12A  | 0.001873 | -11.29625  | * |
| 2334 | Neoplasm                 | SST      | 0        | -10.965373 | * |
| 2335 | Neoplasm                 | AKAP2    | 0.000037 | -10.381697 | * |
| 2336 | Neoplasm                 | ADAMDEC1 | 0        | -10.152414 | * |
| 2337 | Neoplasm                 | ARHGAP4  | 0.009376 | -10.004707 | * |
| 2338 | Neoplasm                 | MXRA7    | 0.000057 | -9.581207  | * |
| 2339 | Neoplasm                 | APBB1    | 0.002109 | -9.463769  | * |
| 2340 | Neoplasm                 | ARNT2    | 0.000153 | -9.389616  | * |
| 2341 | Neoplasm                 | CA1      | 0        | -9.053477  | * |
| 2342 | Neoplasm                 | SLC4A4   | 0        | -8.667366  | * |
| 2343 | Neoplasm                 | BMP3     | 0        | -8.145102  | * |
| 2344 | Neoplasm                 | GREM2    | 0        | -7.997592  | * |
| 2345 | Neoplasm                 | PADI2    | 0        | -7.936984  | * |
| 2346 | Neoplasm                 | LRRC19   | 0        | -7.805174  | * |
| 2347 | Neoplasm                 | SLC30A10 | 0        | -7.69742   | * |
| 2348 | Neoplasm                 | DNAJC15  | 0.005998 | -7.693302  | * |

|      |          |         |          |           |   |
|------|----------|---------|----------|-----------|---|
| 2349 | Neoplasm | EZR     | 0.000093 | -7.689489 | * |
| 2350 | Neoplasm | ABCG2   | 0        | -7.647563 | * |
| 2351 | Neoplasm | C7      | 0        | -7.633682 | * |
| 2352 | Neoplasm | CEACAM7 | 0        | -7.545962 | * |
| 2353 | Neoplasm | PLP1    | 0        | -7.473971 | * |
| 2354 | Neoplasm | ANO5    | 0        | -7.472716 | * |
| 2355 | Neoplasm | SPIB    | 0        | -7.409097 | * |
| 2356 | Neoplasm | IL1R2   | 0        | -7.380576 | * |
| 2357 | Neoplasm | CCL23   | 0        | -7.357297 | * |
| 2358 | Neoplasm | AHCYL2  | 0        | -7.340119 | * |
| 2359 | Neoplasm | CFD     | 0        | -7.220538 | * |
| 2360 | Neoplasm | AKR1B10 | 0        | -6.975418 | * |
| 2361 | Neoplasm | ADA     | 0.000918 | -6.871434 | * |
| 2362 | Neoplasm | MAMDC2  | 0        | -6.862575 | * |
| 2363 | Neoplasm | KLHL29  | 0.000035 | -6.781406 | * |
| 2364 | Neoplasm | PECI    | 0.000314 | -6.594706 | * |
| 2365 | Neoplasm | SCARA5  | 0        | -6.568566 | * |
| 2366 | Neoplasm | MT1X    | 0.000104 | -6.547131 | * |
| 2367 | Neoplasm | PGM5    | 0        | -6.534718 | * |
| 2368 | Neoplasm | ANGPTL1 | 0        | -6.533121 | * |
| 2369 | Neoplasm | ABCA8   | 0        | -6.270179 | * |
| 2370 | Neoplasm | PTGDR   | 0        | -6.211751 | * |
| 2371 | Neoplasm | PDE9A   | 0        | -6.156069 | * |
| 2372 | Neoplasm | GUCA2B  | 0        | -6.089189 | * |
| 2373 | Neoplasm | NEDD4L  | 0        | -6.022941 | * |
| 2374 | Neoplasm | ZCCHC24 | 0.000066 | -5.924274 | * |
| 2375 | Neoplasm | MT1M    | 0        | -5.911706 | * |
| 2376 | Neoplasm | BHLHB9  | 0.000023 | -5.832213 | * |
| 2377 | Neoplasm | FABP1   | 0        | -5.810727 | * |
| 2378 | Neoplasm | SMPDL3A | 0        | -5.769912 | * |
| 2379 | Neoplasm | GLP2R   | 0        | -5.737624 | * |
| 2380 | Neoplasm | TSPAN7  | 0        | -5.645584 | * |
| 2381 | Neoplasm | ADH1B   | 0        | -5.554404 | * |
| 2382 | Neoplasm | KLF4    | 0        | -5.50973  | * |
| 2383 | Neoplasm | COL1A1  | 0        | -5.27529  | * |
| 2384 | Neoplasm | RNF152  | 0        | -5.212137 | * |
| 2385 | Neoplasm | ANPEP   | 0        | -5.185258 | * |
| 2386 | Neoplasm | PDK4    | 0        | -5.092727 | * |
| 2387 | Neoplasm | KCTD14  | 0.00797  | -5.072233 | * |
| 2388 | Neoplasm | PLAUR   | 0.000681 | -4.982758 | * |
| 2389 | Neoplasm | UGT1A8  | 0        | -4.980708 | * |
| 2390 | Neoplasm | VSIG2   | 0        | -4.980351 | * |
| 2391 | Neoplasm | CKB     | 0        | -4.979591 | * |
| 2392 | Neoplasm | DUSP26  | 0        | -4.84096  | * |
| 2393 | Neoplasm | SULT1A2 | 0        | -4.83369  | * |
| 2394 | Neoplasm | STYK1   | 0        | -4.813761 | * |
| 2395 | Neoplasm | PLAC8   | 0        | -4.784491 | * |
| 2396 | Neoplasm | DES     | 0        | -4.751915 | * |
| 2397 | Neoplasm | SHANK2  | 0.002489 | -4.738355 | * |
| 2398 | Neoplasm | KRT24   | 0        | -4.737791 | * |

|      |          |              |          |           |   |
|------|----------|--------------|----------|-----------|---|
| 2399 | Neoplasm | STMN2        | 0        | -4.728854 | * |
| 2400 | Neoplasm | CYFIP2       | 0.009193 | -4.705447 | * |
| 2401 | Neoplasm | ABI3BP       | 0        | -4.621097 | * |
| 2402 | Neoplasm | MGC13057     | 0        | -4.559318 | * |
| 2403 | Neoplasm | CNTN3        | 0        | -4.497293 | * |
| 2404 | Neoplasm | SLC2A4       | 0        | -4.477195 | * |
| 2405 | Neoplasm | CA2          | 0        | -4.439932 | * |
| 2406 | Neoplasm | TNFRSF21     | 0.001076 | -4.374131 | * |
| 2407 | Neoplasm | LPHN3        | 0        | -4.236286 | * |
| 2408 | Neoplasm | ITM2C        | 0        | -4.229678 | * |
| 2409 | Neoplasm | CHGA         | 0        | -4.229168 | * |
| 2410 | Neoplasm | XKR4         | 0        | -4.223866 | * |
| 2411 | Neoplasm | RIN3         | 0.001752 | -4.184932 | * |
| 2412 | Neoplasm | MYOM1        | 0        | -4.090315 | * |
| 2413 | Neoplasm | LIFR         | 0        | -4.027879 | * |
| 2414 | Neoplasm | ABCA5        | 0        | -3.975181 | * |
| 2415 | Neoplasm | TSPAN5       | 0.007824 | -3.9319   | * |
| 2416 | Neoplasm | ASB2         | 0        | -3.873691 | * |
| 2417 | Neoplasm | LDHD         | 0        | -3.865801 | * |
| 2418 | Neoplasm | PTPRH        | 0.000006 | -3.847104 | * |
| 2419 | Neoplasm | DST          | 0        | -3.84509  | * |
| 2420 | Neoplasm | EDIL3        | 0        | -3.838001 | * |
| 2421 | Neoplasm | NOD2         | 0.001996 | -3.814115 | * |
| 2422 | Neoplasm | NCAM1        | 0        | -3.803955 | * |
| 2423 | Neoplasm | PDCD4        | 0        | -3.780027 | * |
| 2424 | Neoplasm | KREMEN1      | 0.001422 | -3.771902 | * |
| 2425 | Neoplasm | MYOT         | 0        | -3.765735 | * |
| 2426 | Neoplasm | LOC100133036 | 0.000455 | -3.761576 | * |
| 2427 | Neoplasm | ASPA         | 0        | -3.759596 | * |
| 2428 | Neoplasm | ENDOD1       | 0        | -3.756257 | * |
| 2429 | Neoplasm | HPGD         | 0        | -3.728274 | * |
| 2430 | Neoplasm | ABHD3        | 0        | -3.704323 | * |
| 2431 | Neoplasm | FAM107A      | 0        | -3.676289 | * |
| 2432 | Neoplasm | CLMN         | 0        | -3.65346  | * |
| 2433 | Neoplasm | IL27RA       | 0.010921 | -3.625801 | * |
| 2434 | Neoplasm | FGFR2        | 0        | -3.619085 | * |
| 2435 | Neoplasm | KRT20        | 0        | -3.617039 | * |
| 2436 | Neoplasm | FGL2         | 0        | -3.611344 | * |
| 2437 | Neoplasm | SYTL2        | 0        | -3.600182 | * |
| 2438 | Neoplasm | TTLL6        | 0        | -3.584756 | * |
| 2439 | Neoplasm | UGDH         | 0        | -3.557058 | * |
| 2440 | Neoplasm | MT1F         | 0.000013 | -3.521489 | * |
| 2441 | Neoplasm | NR3C2        | 0        | -3.51958  | * |
| 2442 | Neoplasm | MT1H         | 0.000111 | -3.498151 | * |
| 2443 | Neoplasm | UGP2         | 0        | -3.476231 | * |
| 2444 | Neoplasm | IL6R         | 0        | -3.472127 | * |
| 2445 | Neoplasm | C1orf115     | 0        | -3.453543 | * |
| 2446 | Neoplasm | CHL1         | 0        | -3.44257  | * |
| 2447 | Neoplasm | SEPP1        | 0.000081 | -3.413388 | * |
| 2448 | Neoplasm | NAP1L2       | 0        | -3.408223 | * |

|      |          |          |          |           |   |
|------|----------|----------|----------|-----------|---|
| 2449 | Neoplasm | LGALS4   | 0        | -3.375029 | * |
| 2450 | Neoplasm | GNG7     | 0        | -3.345331 | * |
| 2451 | Neoplasm | FTH1     | 0        | -3.343445 | * |
| 2452 | Neoplasm | GSN      | 0        | -3.342984 | * |
| 2453 | Neoplasm | MGLL     | 0        | -3.330854 | * |
| 2454 | Neoplasm | SCN9A    | 0        | -3.33028  | * |
| 2455 | Neoplasm | VWA5A    | 0.000217 | -3.294359 | * |
| 2456 | Neoplasm | SLC9A2   | 0        | -3.285396 | * |
| 2457 | Neoplasm | CMAH     | 0        | -3.269691 | * |
| 2458 | Neoplasm | ENTPD5   | 0        | -3.256894 | * |
| 2459 | Neoplasm | ASAH1    | 0        | -3.234965 | * |
| 2460 | Neoplasm | LRRN2    | 0        | -3.229834 | * |
| 2461 | Neoplasm | PPP2R3A  | 0        | -3.227965 | * |
| 2462 | Neoplasm | TP53INP2 | 0        | -3.225235 | * |
| 2463 | Neoplasm | ADHFE1   | 0        | -3.214011 | * |
| 2464 | Neoplasm | IL8      | 0        | -3.187774 | * |
| 2465 | Neoplasm | GCNT3    | 0        | -3.173418 | * |
| 2466 | Neoplasm | SLC9A9   | 0        | -3.13727  | * |
| 2467 | Neoplasm | PRPH     | 0        | -3.134704 | * |
| 2468 | Neoplasm | COL1A2   | 0        | -3.116379 | * |
| 2469 | Neoplasm | ZZEF1    | 0        | -3.11274  | * |
| 2470 | Neoplasm | RCAN2    | 0        | -3.079993 | * |
| 2471 | Neoplasm | H2AFY2   | 0.001143 | -3.062461 | * |
| 2472 | Neoplasm | RPS6KA2  | 0.000906 | -3.03861  | * |
| 2473 | Neoplasm | RGS9     | 0        | -3.036885 | * |
| 2474 | Neoplasm | SSPN     | 0        | -2.996206 | * |
| 2475 | Neoplasm | ETFDH    | 0        | -2.976442 | * |
| 2476 | Neoplasm | SCNN1B   | 0        | -2.974333 | * |
| 2477 | Neoplasm | MATN2    | 0        | -2.966749 | * |
| 2478 | Neoplasm | NIN      | 0.002411 | -2.950444 | * |
| 2479 | Neoplasm | PLCL2    | 0        | -2.919786 | * |
| 2480 | Neoplasm | SMA4     | 0.002489 | -2.881049 | * |
| 2481 | Neoplasm | SEMA4G   | 0.000002 | -2.809155 | * |
| 2482 | Neoplasm | BCAR3    | 0        | -2.801465 | * |
| 2483 | Neoplasm | ETHE1    | 0        | -2.789342 | * |
| 2484 | Neoplasm | PLCE1    | 0        | -2.783588 | * |
| 2485 | Neoplasm | SELENBP1 | 0        | -2.780562 | * |
| 2486 | Neoplasm | LGALS2   | 0        | -2.769808 | * |
| 2487 | Neoplasm | FAM82A1  | 0        | -2.720413 | * |
| 2488 | Neoplasm | SRI      | 0        | -2.719712 | * |
| 2489 | Neoplasm | C21orf91 | 0.002861 | -2.717137 | * |
| 2490 | Neoplasm | KLF9     | 0        | -2.712093 | * |
| 2491 | Neoplasm | NEGR1    | 0        | -2.694065 | * |
| 2492 | Neoplasm | CERK     | 0.000002 | -2.692917 | * |
| 2493 | Neoplasm | LPAR1    | 0        | -2.687341 | * |
| 2494 | Neoplasm | METTL7A  | 0        | -2.682637 | * |
| 2495 | Neoplasm | MUSK     | 0        | -2.675855 | * |
| 2496 | Neoplasm | MAOA     | 0        | -2.629701 | * |
| 2497 | Neoplasm | GPER     | 0        | -2.589188 | * |
| 2498 | Neoplasm | ARAP3    | 0.001833 | -2.566309 | * |

|      |          |          |          |           |   |
|------|----------|----------|----------|-----------|---|
| 2499 | Neoplasm | PKN3     | 0.004844 | -2.558328 | * |
| 2500 | Neoplasm | STXBP1   | 0.000493 | -2.546501 | * |
| 2501 | Neoplasm | GCNT2    | 0        | -2.528225 | * |
| 2502 | Neoplasm | MALL     | 0        | -2.526251 | * |
| 2503 | Neoplasm | CDADC1   | 0.010743 | -2.517064 | * |
| 2504 | Neoplasm | CCL15    | 0        | -2.514962 | * |
| 2505 | Neoplasm | GNAZ     | 0.006346 | -2.490276 | * |
| 2506 | Neoplasm | GFRA2    | 0        | -2.441722 | * |
| 2507 | Neoplasm | SLC25A23 | 0        | -2.433656 | * |
| 2508 | Neoplasm | FAM122B  | 0.001461 | -2.429466 | * |
| 2509 | Neoplasm | RDH5     | 0        | -2.421524 | * |
| 2510 | Neoplasm | PAPSS2   | 0.000012 | -2.421199 | * |
| 2511 | Neoplasm | LDLRAD3  | 0.004268 | -2.392044 | * |
| 2512 | Neoplasm | PBLD     | 0.000056 | -2.361208 | * |
| 2513 | Neoplasm | FEV      | 0        | -2.345562 | * |
| 2514 | Neoplasm | AMOT     | 0.000438 | -2.342343 | * |
| 2515 | Neoplasm | NUCB2    | 0.000906 | -2.339025 | * |
| 2516 | Neoplasm | C12orf75 | 0.001734 | -2.317002 | * |
| 2517 | Neoplasm | EPHX2    | 0        | -2.313872 | * |
| 2518 | Neoplasm | CCL20    | 0        | -2.310437 | * |
| 2519 | Neoplasm | GADD45B  | 0.000069 | -2.281425 | * |
| 2520 | Neoplasm | RETSAT   | 0        | -2.247195 | * |
| 2521 | Neoplasm | MT2A     | 0.000103 | -2.240731 | * |
| 2522 | Neoplasm | FAM165B  | 0.002833 | -2.214773 | * |
| 2523 | Neoplasm | MAP4K4   | 0.00762  | -2.208468 | * |
| 2524 | Neoplasm | KDELC1   | 0.000398 | -2.193848 | * |
| 2525 | Neoplasm | SLC35A3  | 0.000006 | -2.193479 | * |
| 2526 | Neoplasm | FAM117A  | 0.001005 | -2.147714 | * |
| 2527 | Neoplasm | AFMID    | 0.007178 | -2.142616 | * |
| 2528 | Neoplasm | ASRGL1   | 0.000606 | -2.141308 | * |
| 2529 | Neoplasm | GCSH     | 0.000331 | -2.129068 | * |
| 2530 | Neoplasm | C13orf27 | 0.005311 | -2.12821  | * |
| 2531 | Neoplasm | ACTN1    | 0.002111 | -2.095127 | * |
| 2532 | Neoplasm | NDRG2    | 0        | -2.076818 | * |
| 2533 | Neoplasm | TFCP2L1  | 0.000006 | -2.064292 | * |
| 2534 | Neoplasm | ITGAE    | 0.001469 | -2.060081 | * |
| 2535 | Neoplasm | GPM6B    | 0.00016  | -2.054248 | * |
| 2536 | Neoplasm | PPARGC1B | 0        | -2.053557 | * |
| 2537 | Neoplasm | PYY2     | 0        | -2.037223 | * |
| 2538 | Neoplasm | RGS12    | 0.000145 | -2.034738 | * |
| 2539 | Neoplasm | HBS1L    | 0.007833 | -2.022446 | * |
| 2540 | Neoplasm | STXBP4   | 0.000915 | -2.020477 | * |
| 2541 | Neoplasm | MTM1     | 0        | -2.004337 | * |
| 2542 | Neoplasm | NUP88    | 0.000044 | -2.000945 | * |
| 2543 | Neoplasm | CBX3     | 0.000002 | 2.001406  | * |
| 2544 | Neoplasm | RICS     | 0.002281 | 2.00378   | * |
| 2545 | Neoplasm | PPAT     | 0        | 2.003797  | * |
| 2546 | Neoplasm | NAV1     | 0.003047 | 2.006438  | * |
| 2547 | Neoplasm | AHI1     | 0.001956 | 2.00725   | * |
| 2548 | Neoplasm | LEF1     | 0.000003 | 2.020075  | * |



|      |          |          |          |          |   |
|------|----------|----------|----------|----------|---|
| 2549 | Neoplasm | KLF6     | 0.000317 | 2.026256 | * |
| 2550 | Neoplasm | SLC37A1  | 0.003869 | 2.05366  | * |
| 2551 | Neoplasm | BTC      | 0.002633 | 2.061006 | * |
| 2552 | Neoplasm | RAB25    | 0        | 2.064122 | * |
| 2553 | Neoplasm | RUVBL2   | 0        | 2.080554 | * |
| 2554 | Neoplasm | PLAU     | 0        | 2.089529 | * |
| 2555 | Neoplasm | RAB3IP   | 0.006591 | 2.091907 | * |
| 2556 | Neoplasm | EVI1     | 0        | 2.095975 | * |
| 2557 | Neoplasm | CDC42EP5 | 0.004285 | 2.097259 | * |
| 2558 | Neoplasm | S100A11  | 0        | 2.125055 | * |
| 2559 | Neoplasm | RELB     | 0.000032 | 2.12627  | * |
| 2560 | Neoplasm | ITPR1    | 0.002765 | 2.138918 | * |
| 2561 | Neoplasm | PRELID2  | 0.002978 | 2.143646 | * |
| 2562 | Neoplasm | GZMB     | 0        | 2.14732  | * |
| 2563 | Neoplasm | C7orf68  | 0        | 2.153691 | * |
| 2564 | Neoplasm | RFFL     | 0.011567 | 2.168506 | * |
| 2565 | Neoplasm | NAMPT    | 0.003272 | 2.17292  | * |
| 2566 | Neoplasm | PIK3AP1  | 0.009172 | 2.191098 | * |
| 2567 | Neoplasm | RUVBL1   | 0        | 2.19596  | * |
| 2568 | Neoplasm | TMPRSS3  | 0.000022 | 2.198838 | * |
| 2569 | Neoplasm | LIPG     | 0        | 2.199623 | * |
| 2570 | Neoplasm | FOXO1    | 0.002141 | 2.202191 | * |
| 2571 | Neoplasm | EPHA2    | 0.000809 | 2.238186 | * |
| 2572 | Neoplasm | PELI1    | 0.008021 | 2.291038 | * |
| 2573 | Neoplasm | MICAL2   | 0.007571 | 2.297255 | * |
| 2574 | Neoplasm | MICB     | 0        | 2.307009 | * |
| 2575 | Neoplasm | DIO2     | 0        | 2.327507 | * |
| 2576 | Neoplasm | LRIG1    | 0.000003 | 2.3356   | * |
| 2577 | Neoplasm | CAD      | 0        | 2.341609 | * |
| 2578 | Neoplasm | SORD     | 0.000001 | 2.341712 | * |
| 2579 | Neoplasm | SOX4     | 0        | 2.357896 | * |
| 2580 | Neoplasm | RNF19B   | 0.000829 | 2.360887 | * |
| 2581 | Neoplasm | AHCY     | 0        | 2.368393 | * |
| 2582 | Neoplasm | CBFB     | 0        | 2.373268 | * |
| 2583 | Neoplasm | CALD1    | 0.002728 | 2.375107 | * |
| 2584 | Neoplasm | GART     | 0.000004 | 2.378751 | * |
| 2585 | Neoplasm | PHLDA1   | 0.000078 | 2.380134 | * |
| 2586 | Neoplasm | EPHB2    | 0        | 2.414518 | * |
| 2587 | Neoplasm | CFTR     | 0        | 2.433296 | * |
| 2588 | Neoplasm | ASPH     | 0.002489 | 2.433736 | * |
| 2589 | Neoplasm | TKT      | 0        | 2.451599 | * |
| 2590 | Neoplasm | TMTC2    | 0.005608 | 2.454877 | * |
| 2591 | Neoplasm | MYC      | 0        | 2.456466 | * |
| 2592 | Neoplasm | GNPDA1   | 0        | 2.457018 | * |
| 2593 | Neoplasm | PSAT1    | 0.000001 | 2.45864  | * |
| 2594 | Neoplasm | LAMB3    | 0.000398 | 2.471631 | * |
| 2595 | Neoplasm | ANXA3    | 0        | 2.482915 | * |
| 2596 | Neoplasm | PLEKHG6  | 0.000018 | 2.486377 | * |
| 2597 | Neoplasm | PRSS22   | 0        | 2.510166 | * |
| 2598 | Neoplasm | SLC2A1   | 0.011553 | 2.526756 | * |

|      |          |          |          |          |   |
|------|----------|----------|----------|----------|---|
| 2599 | Neoplasm | CDK4     | 0        | 2.532799 | * |
| 2600 | Neoplasm | LYZ      | 0.000146 | 2.538796 | * |
| 2601 | Neoplasm | PUS7     | 0        | 2.587607 | * |
| 2602 | Neoplasm | GBP3     | 0.011258 | 2.604555 | * |
| 2603 | Neoplasm | SATB1    | 0.000622 | 2.633717 | * |
| 2604 | Neoplasm | SLC6A20  | 0        | 2.639076 | * |
| 2605 | Neoplasm | SERPINB5 | 0.000106 | 2.639584 | * |
| 2606 | Neoplasm | SRPX2    | 0        | 2.686563 | * |
| 2607 | Neoplasm | RAE1     | 0        | 2.721182 | * |
| 2608 | Neoplasm | SGK493   | 0.000098 | 2.724975 | * |
| 2609 | Neoplasm | XPOT     | 0        | 2.753208 | * |
| 2610 | Neoplasm | FEN1     | 0.000001 | 2.754245 | * |
| 2611 | Neoplasm | LAMC2    | 0.002514 | 2.755622 | * |
| 2612 | Neoplasm | IL15     | 0.013563 | 2.811039 | * |
| 2613 | Neoplasm | GAS6     | 0.001571 | 2.831992 | * |
| 2614 | Neoplasm | PTPRB    | 0.011339 | 2.840252 | * |
| 2615 | Neoplasm | SULT2B1  | 0        | 2.841578 | * |
| 2616 | Neoplasm | FAP      | 0        | 2.874475 | * |
| 2617 | Neoplasm | TC2N     | 0.000451 | 2.897627 | * |
| 2618 | Neoplasm | ARNTL2   | 0        | 2.916175 | * |
| 2619 | Neoplasm | EMP1     | 0.001917 | 2.939115 | * |
| 2620 | Neoplasm | TGIF2    | 0        | 2.950146 | * |
| 2621 | Neoplasm | ENC1     | 0        | 2.981497 | * |
| 2622 | Neoplasm | SHMT2    | 0        | 2.982462 | * |
| 2623 | Neoplasm | WNT2     | 0        | 3.026185 | * |
| 2624 | Neoplasm | TCN1     | 0.000005 | 3.04367  | * |
| 2625 | Neoplasm | RIPK2    | 0        | 3.046851 | * |
| 2626 | Neoplasm | C6orf141 | 0.000221 | 3.055869 | * |
| 2627 | Neoplasm | F12      | 0        | 3.082553 | * |
| 2628 | Neoplasm | CSE1L    | 0        | 3.113288 | * |
| 2629 | Neoplasm | AHR      | 0.001909 | 3.127997 | * |
| 2630 | Neoplasm | TRIP13   | 0        | 3.129853 | * |
| 2631 | Neoplasm | TMC7     | 0.003133 | 3.179847 | * |
| 2632 | Neoplasm | EHF      | 0.001859 | 3.193743 | * |
| 2633 | Neoplasm | GALNT6   | 0        | 3.209837 | * |
| 2634 | Neoplasm | FOXM1    | 0        | 3.25519  | * |
| 2635 | Neoplasm | B3GALTL  | 0.021845 | 3.260611 | * |
| 2636 | Neoplasm | RFC3     | 0        | 3.266386 | * |
| 2637 | Neoplasm | KIAA1244 | 0.004306 | 3.268442 | * |
| 2638 | Neoplasm | HSPH1    | 0        | 3.304369 | * |
| 2639 | Neoplasm | MMP11    | 0        | 3.315333 | * |
| 2640 | Neoplasm | NEK2     | 0        | 3.324418 | * |
| 2641 | Neoplasm | PHF19    | 0        | 3.363376 | * |
| 2642 | Neoplasm | GTF2IRD1 | 0        | 3.438892 | * |
| 2643 | Neoplasm | ISG20    | 0.001535 | 3.472504 | * |
| 2644 | Neoplasm | GRTP1    | 0.007655 | 3.51089  | * |
| 2645 | Neoplasm | SOX9     | 0        | 3.525201 | * |
| 2646 | Neoplasm | AURKA    | 0        | 3.60953  | * |
| 2647 | Neoplasm | ASPHD1   | 0.000059 | 3.685163 | * |
| 2648 | Neoplasm | NOSTRIN  | 0.000008 | 3.735735 | * |



|      |          |           |          |          |   |
|------|----------|-----------|----------|----------|---|
| 2649 | Neoplasm | RNF43     | 0        | 3.773159 | * |
| 2650 | Neoplasm | AXIN2     | 0        | 3.780513 | * |
| 2651 | Neoplasm | ECT2      | 0        | 3.796085 | * |
| 2652 | Neoplasm | SGK1      | 0.001646 | 3.807677 | * |
| 2653 | Neoplasm | C6orf150  | 0.000637 | 3.823718 | * |
| 2654 | Neoplasm | TEAD4     | 0        | 3.834439 | * |
| 2655 | Neoplasm | CEACAM6   | 0        | 3.836542 | * |
| 2656 | Neoplasm | MTHFD1L   | 0        | 3.850213 | * |
| 2657 | Neoplasm | KIF2C     | 0        | 3.85728  | * |
| 2658 | Neoplasm | PERP      | 0.00016  | 3.924924 | * |
| 2659 | Neoplasm | TNFRSF12A | 0        | 3.960342 | * |
| 2660 | Neoplasm | COL3A1    | 0        | 3.961379 | * |
| 2661 | Neoplasm | KIAA1549  | 0        | 3.982443 | * |
| 2662 | Neoplasm | DUSP14    | 0        | 4.00981  | * |
| 2663 | Neoplasm | PMAIP1    | 0        | 4.0525   | * |
| 2664 | Neoplasm | CRISPLD2  | 0.003101 | 4.130039 | * |
| 2665 | Neoplasm | HRASLS2   | 0.005377 | 4.150647 | * |
| 2666 | Neoplasm | MAML3     | 0.000367 | 4.210823 | * |
| 2667 | Neoplasm | ATP1B1    | 0.011528 | 4.236133 | * |
| 2668 | Neoplasm | LRP8      | 0        | 4.270411 | * |
| 2669 | Neoplasm | MACC1     | 0        | 4.314678 | * |
| 2670 | Neoplasm | CFB       | 0        | 4.493717 | * |
| 2671 | Neoplasm | KRT6B     | 0        | 4.60545  | * |
| 2672 | Neoplasm | ITGB6     | 0.010505 | 4.691657 | * |
| 2673 | Neoplasm | COL11A1   | 0        | 4.702894 | * |
| 2674 | Neoplasm | TIMP1     | 0        | 4.70745  | * |
| 2675 | Neoplasm | COL10A1   | 0        | 4.817021 | * |
| 2676 | Neoplasm | HIG2      | 0        | 4.883932 | * |
| 2677 | Neoplasm | MXRA5     | 0        | 4.893707 | * |
| 2678 | Neoplasm | SCD       | 0        | 5.187389 | * |
| 2679 | Neoplasm | C10orf81  | 0        | 5.202957 | * |
| 2680 | Neoplasm | JUB       | 0        | 5.213452 | * |
| 2681 | Neoplasm | KLK10     | 0        | 5.296705 | * |
| 2682 | Neoplasm | C2        | 0        | 5.353924 | * |
| 2683 | Neoplasm | HNMT      | 0.000612 | 5.36264  | * |
| 2684 | Neoplasm | SLC12A2   | 0        | 5.407283 | * |
| 2685 | Neoplasm | CDC25B    | 0        | 5.477842 | * |
| 2686 | Neoplasm | IFITM2    | 0        | 5.573947 | * |
| 2687 | Neoplasm | ANGPT2    | 0        | 5.576995 | * |
| 2688 | Neoplasm | FUT1      | 0        | 5.600347 | * |
| 2689 | Neoplasm | C4orf18   | 0.000603 | 5.634592 | * |
| 2690 | Neoplasm | IFITM3    | 0        | 5.692057 | * |
| 2691 | Neoplasm | CORO2A    | 0.00024  | 5.714594 | * |
| 2692 | Neoplasm | SLC6A6    | 0        | 5.867304 | * |
| 2693 | Neoplasm | RIN2      | 0.003922 | 6.118772 | * |
| 2694 | Neoplasm | SLCO4A1   | 0        | 6.200143 | * |
| 2695 | Neoplasm | TPX2      | 0        | 6.228968 | * |
| 2696 | Neoplasm | HKDC1     | 0        | 6.281857 | * |
| 2697 | Neoplasm | NFE2L3    | 0        | 6.347771 | * |
| 2698 | Neoplasm | PDPN      | 0        | 6.509429 | * |

|      |                     |          |          |             |   |
|------|---------------------|----------|----------|-------------|---|
| 2699 | Neoplasm            | PLA2G16  | 0.000041 | 6.576225    | * |
| 2700 | Neoplasm            | SLC22A3  | 0        | 6.579632    | * |
| 2701 | Neoplasm            | MMP12    | 0        | 6.617377    | * |
| 2702 | Neoplasm            | MOBKL2B  | 0.000002 | 6.742703    | * |
| 2703 | Neoplasm            | CXCL1    | 0        | 6.760238    | * |
| 2704 | Neoplasm            | TGFB1    | 0        | 6.776373    | * |
| 2705 | Neoplasm            | HNF4G    | 0.000197 | 6.892561    | * |
| 2706 | Neoplasm            | IFITM1   | 0        | 7.052299    | * |
| 2707 | Neoplasm            | PPFIBP2  | 0.002111 | 7.097961    | * |
| 2708 | Neoplasm            | TUSC1    | 0.00533  | 7.119789    | * |
| 2709 | Neoplasm            | CXCL3    | 0        | 7.233392    | * |
| 2710 | Neoplasm            | SPP1     | 0        | 7.465531    | * |
| 2711 | Neoplasm            | RHOU     | 0.005679 | 7.751974    | * |
| 2712 | Neoplasm            | PLA2G4A  | 0.000714 | 7.759894    | * |
| 2713 | Neoplasm            | VSNL1    | 0        | 7.895906    | * |
| 2714 | Neoplasm            | SLC7A5   | 0        | 8.08427     | * |
| 2715 | Neoplasm            | ACAN     | 0        | 8.376905    | * |
| 2716 | Neoplasm            | ASCL2    | 0        | 9.699198    | * |
| 2717 | Neoplasm            | RGS2     | 0.004578 | 9.788947    | * |
| 2718 | Neoplasm            | S100A2   | 0        | 9.973432    | * |
| 2719 | Neoplasm            | C4orf19  | 0.009848 | 10.587365   | * |
| 2720 | Neoplasm            | TRIB3    | 0        | 11.35587    | * |
| 2721 | Neoplasm            | NKD2     | 0        | 11.439044   | * |
| 2722 | Neoplasm            | ETV4     | 0        | 11.501499   | * |
| 2723 | Neoplasm            | TESC     | 0        | 13.19731    | * |
| 2724 | Neoplasm            | KRT80    | 0        | 13.520844   | * |
| 2725 | Neoplasm            | CHI3L1   | 0        | 13.656201   | * |
| 2726 | Neoplasm            | GIPC2    | 0.004653 | 14.36361    | * |
| 2727 | Neoplasm            | CEACAM5  | 0.000107 | 14.723837   | * |
| 2728 | Neoplasm            | CDH3     | 0        | 15.2885     | * |
| 2729 | Neoplasm            | THBS2    | 0        | 17.081759   | * |
| 2730 | Neoplasm            | MMP1     | 0        | 17.200457   | * |
| 2731 | Neoplasm            | COL17A1  | 0.000002 | 18.405641   | * |
| 2732 | Neoplasm            | ALOX5    | 0.001012 | 19.6864     | * |
| 2733 | Neoplasm            | CLDN1    | 0        | 24.94407    | * |
| 2734 | Neoplasm            | KIAA1199 | 0        | 25.62671    | * |
| 2735 | Neoplasm            | FABP6    | 0        | 28.317192   | * |
| 2736 | Neoplasm            | ALDH1A1  | 0.011623 | 28.481741   | * |
| 2737 | Neoplasm            | INHBA    | 0        | 29.760912   | * |
| 2738 | Neoplasm            | CREB3L1  | 0.000055 | 32.962055   | * |
| 2739 | Neoplasm            | DPEP1    | 0        | 35.291528   | * |
| 2740 | Neoplasm            | FOXQ1    | 0        | 40.632401   | * |
| 2741 | Neoplasm            | MMP3     | 0        | 41.143075   | * |
| 2742 | Neoplasm            | MMP7     | 0        | 53.848067   | * |
| 2743 | Neoplasm            | KRT23    | 0        | 77.872506   | * |
| 2744 | Neoplasm Metastasis | ITLN1    | 0        | -292.109149 | * |
| 2745 | Neoplasm Metastasis | ZG16     | 0        | -33.964274  | * |
| 2746 | Neoplasm Metastasis | CLCA4    | 0        | -26.62882   | * |
| 2747 | Neoplasm Metastasis | CA4      | 0        | -15.845909  | * |
| 2748 | Neoplasm Metastasis | SPINK4   | 0        | -13.759937  | * |

|      |                     |          |          |            |   |
|------|---------------------|----------|----------|------------|---|
| 2749 | Neoplasm Metastasis | CLCA1    | 0        | -13.405836 | * |
| 2750 | Neoplasm Metastasis | CEACAM7  | 0        | -13.361052 | * |
| 2751 | Neoplasm Metastasis | FCGBP    | 0        | -11.391719 | * |
| 2752 | Neoplasm Metastasis | CA1      | 0        | -10.844196 | * |
| 2753 | Neoplasm Metastasis | ACTG2    | 0        | -9.991796  | * |
| 2754 | Neoplasm Metastasis | VSIG2    | 0        | -9.837015  | * |
| 2755 | Neoplasm Metastasis | MAB21L2  | 0        | -9.207376  | * |
| 2756 | Neoplasm Metastasis | VIP      | 0        | -8.944965  | * |
| 2757 | Neoplasm Metastasis | GUCA2A   | 0        | -8.661259  | * |
| 2758 | Neoplasm Metastasis | IGJ      | 0        | -8.072572  | * |
| 2759 | Neoplasm Metastasis | FAM55D   | 0        | -7.716639  | * |
| 2760 | Neoplasm Metastasis | AQP8     | 0        | -7.15219   | * |
| 2761 | Neoplasm Metastasis | MS4A12   | 0        | -6.806925  | * |
| 2762 | Neoplasm Metastasis | CA2      | 0        | -6.540386  | * |
| 2763 | Neoplasm Metastasis | MMP3     | 0        | -5.405218  | * |
| 2764 | Neoplasm Metastasis | ADAMDEC1 | 0        | -5.086967  | * |
| 2765 | Neoplasm Metastasis | C6ORF105 | 0        | -4.303634  | * |
| 2766 | Neoplasm Metastasis | TPSG1    | 0        | -3.941812  | * |
| 2767 | Neoplasm Metastasis | IL1R2    | 0        | -3.923934  | * |
| 2768 | Neoplasm Metastasis | MYH11    | 0        | -3.527813  | * |
| 2769 | Neoplasm Metastasis | TCF21    | 0        | -3.244161  | * |
| 2770 | Neoplasm Metastasis | SPARCL1  | 0.000004 | -3.096174  | * |
| 2771 | Neoplasm Metastasis | PYY      | 0        | -3.042799  | * |
| 2772 | Neoplasm Metastasis | ITM2C    | 0.000001 | -2.872164  | * |
| 2773 | Neoplasm Metastasis | PIGR     | 0        | -2.867408  | * |
| 2774 | Neoplasm Metastasis | BCAS1    | 0        | -2.845971  | * |
| 2775 | Neoplasm Metastasis | PLAC8    | 0        | -2.715367  | * |
| 2776 | Neoplasm Metastasis | SDCBP2   | 0.000331 | -2.495947  | * |
| 2777 | Neoplasm Metastasis | FOXF1    | 0        | -2.466208  | * |
| 2778 | Neoplasm Metastasis | TSPAN1   | 0        | -2.411097  | * |
| 2779 | Neoplasm Metastasis | FAM46C   | 0.000005 | -2.22057   | * |
| 2780 | Neoplasm Metastasis | LGALS4   | 0.000004 | -2.055385  | * |
| 2781 | Neoplasm Metastasis | NNMT     | 0.000001 | 2.298865   | * |
| 2782 | Neoplasm Metastasis | BGN      | 0        | 2.314266   | * |
| 2783 | Neoplasm Metastasis | COLEC11  | 0        | 5.278582   | * |
| 2784 | Neoplasm Metastasis | SPP1     | 0        | 5.857485   | * |
| 2785 | Neoplasm Metastasis | C10orf10 | 0.000003 | 7.305578   | * |
| 2786 | Neoplasm Metastasis | HP       | 0.000009 | 21.852969  | * |
| 2787 | Neoplasm Metastasis | CRP      | 0.000002 | 25.311911  | * |
| 2788 | Normal colon        | FXYD5    | 0.004697 | -64.324786 | * |
| 2789 | Normal colon        | CDH3     | 0        | -33.651977 | * |
| 2790 | Normal colon        | HS6ST2   | 0.004518 | -24.301075 | * |
| 2791 | Normal colon        | PITX1    | 0.004952 | -22.45     | * |
| 2792 | Normal colon        | SLC3A2   | 0.004792 | -14.29764  | * |
| 2793 | Normal colon        | SLC39A6  | 0.006116 | -11.756536 | * |
| 2794 | Normal colon        | LDLRAD3  | 0.00613  | -11.487923 | * |
| 2795 | Normal colon        | GRB10    | 0.003715 | -10.421296 | * |
| 2796 | Normal colon        | ACCN2    | 0.004094 | -10.236928 | * |
| 2797 | Normal colon        | ASNS     | 0.005077 | -9.20214   | * |
| 2798 | Normal colon        | FOXQ1    | 0        | -8.865371  | * |

|      |              |          |          |           |   |
|------|--------------|----------|----------|-----------|---|
| 2799 | Normal colon | KIAA1199 | 0        | -8.794741 | * |
| 2800 | Normal colon | CD81     | 0.00466  | -8.248565 | * |
| 2801 | Normal colon | TESC     | 0        | -7.681462 | * |
| 2802 | Normal colon | GRPEL2   | 0.00466  | -7.668546 | * |
| 2803 | Normal colon | CLDN1    | 0        | -7.38952  | * |
| 2804 | Normal colon | DPP7     | 0.006116 | -6.682502 | * |
| 2805 | Normal colon | C20orf20 | 0        | -6.620339 | * |
| 2806 | Normal colon | ETV4     | 0        | -6.46072  | * |
| 2807 | Normal colon | YARS     | 0.00274  | -6.348424 | * |
| 2808 | Normal colon | HSPA13   | 0.005681 | -6.341991 | * |
| 2809 | Normal colon | CDK4     | 0.004518 | -6.24989  | * |
| 2810 | Normal colon | ASCL2    | 0        | -6.206657 | * |
| 2811 | Normal colon | TMEM185B | 0.003715 | -5.837496 | * |
| 2812 | Normal colon | TSPYL2   | 0.00274  | -5.747126 | * |
| 2813 | Normal colon | CIRH1A   | 0.00274  | -5.542027 | * |
| 2814 | Normal colon | FKBP10   | 0        | -5.486196 | * |
| 2815 | Normal colon | TEX10    | 0        | -5.289375 | * |
| 2816 | Normal colon | AHCY     | 0.004518 | -5.223647 | * |
| 2817 | Normal colon | WDR74    | 0.004146 | -5.075321 | * |
| 2818 | Normal colon | COL1A1   | 0        | -4.999549 | * |
| 2819 | Normal colon | TRIB3    | 0        | -4.969046 | * |
| 2820 | Normal colon | G6PC3    | 0.00274  | -4.886922 | * |
| 2821 | Normal colon | XPO5     | 0.00184  | -4.886191 | * |
| 2822 | Normal colon | DTD1     | 0.005681 | -4.857716 | * |
| 2823 | Normal colon | LDHB     | 0.002827 | -4.81117  | * |
| 2824 | Normal colon | FTSJ1    | 0.004078 | -4.767414 | * |
| 2825 | Normal colon | NOC3L    | 0.005681 | -4.69697  | * |
| 2826 | Normal colon | CLDN2    | 0        | -4.68898  | * |
| 2827 | Normal colon | NKD2     | 0        | -4.664191 | * |
| 2828 | Normal colon | TOMM34   | 0.004391 | -4.503749 | * |
| 2829 | Normal colon | NONO     | 0.002827 | -4.4933   | * |
| 2830 | Normal colon | COQ10A   | 0.00274  | -4.468316 | * |
| 2831 | Normal colon | MORN4    | 0.004078 | -4.44856  | * |
| 2832 | Normal colon | RNF43    | 0        | -4.365724 | * |
| 2833 | Normal colon | SOX4     | 0        | -4.357218 | * |
| 2834 | Normal colon | KLC2     | 0.005798 | -4.347443 | * |
| 2835 | Normal colon | ZNF473   | 0.000543 | -4.320616 | * |
| 2836 | Normal colon | SERPINB5 | 0        | -4.320446 | * |
| 2837 | Normal colon | OGFOD1   | 0.002827 | -4.274142 | * |
| 2838 | Normal colon | GPN3     | 0.005925 | -4.245142 | * |
| 2839 | Normal colon | NSUN5    | 0.00274  | -4.223239 | * |
| 2840 | Normal colon | NT5C3L   | 0.004078 | -4.209745 | * |
| 2841 | Normal colon | EFTUD2   | 0.004518 | -4.19284  | * |
| 2842 | Normal colon | SMYD5    | 0.005204 | -4.192783 | * |
| 2843 | Normal colon | IPO5     | 0.000543 | -4.148212 | * |
| 2844 | Normal colon | UNC119B  | 0.005142 | -4.129353 | * |
| 2845 | Normal colon | GART     | 0.00466  | -4.111965 | * |
| 2846 | Normal colon | TXNDC5   | 0.003331 | -4.108174 | * |
| 2847 | Normal colon | PHLDA1   | 0        | -4.083523 | * |
| 2848 | Normal colon | ESYT1    | 0.004518 | -4.039931 | * |

|      |              |         |          |           |   |
|------|--------------|---------|----------|-----------|---|
| 2849 | Normal colon | KLHL11  | 0.004146 | -4.02168  | * |
| 2850 | Normal colon | KIF20A  | 0        | -4.011787 | * |
| 2851 | Normal colon | ENC1    | 0        | -4.009264 | * |
| 2852 | Normal colon | POLD2   | 0.005681 | -3.983102 | * |
| 2853 | Normal colon | NMT1    | 0.005681 | -3.920484 | * |
| 2854 | Normal colon | PHF16   | 0.00274  | -3.915459 | * |
| 2855 | Normal colon | TCF7    | 0.004146 | -3.880342 | * |
| 2856 | Normal colon | RUVBL1  | 0.005681 | -3.875942 | * |
| 2857 | Normal colon | PREB    | 0.004956 | -3.832184 | * |
| 2858 | Normal colon | VARS    | 0.00184  | -3.789916 | * |
| 2859 | Normal colon | LUZP6   | 0.004518 | -3.782718 | * |
| 2860 | Normal colon | MMP11   | 0        | -3.765944 | * |
| 2861 | Normal colon | PUS7    | 0        | -3.759485 | * |
| 2862 | Normal colon | RAN     | 0.006116 | -3.745088 | * |
| 2863 | Normal colon | ARMC6   | 0.004518 | -3.744797 | * |
| 2864 | Normal colon | CSDA    | 0.005077 | -3.70852  | * |
| 2865 | Normal colon | USP5    | 0.003715 | -3.700412 | * |
| 2866 | Normal colon | G6PD    | 0.00274  | -3.692506 | * |
| 2867 | Normal colon | SLC7A5  | 0        | -3.690876 | * |
| 2868 | Normal colon | PRMT5   | 0.003998 | -3.657105 | * |
| 2869 | Normal colon | TRIM28  | 0.004518 | -3.638133 | * |
| 2870 | Normal colon | SOX9    | 0        | -3.633093 | * |
| 2871 | Normal colon | HIAT1   | 0.005479 | -3.620712 | * |
| 2872 | Normal colon | DPF2    | 0.005681 | -3.620165 | * |
| 2873 | Normal colon | SF3B3   | 0.005501 | -3.613169 | * |
| 2874 | Normal colon | ENO1    | 0.00274  | -3.587509 | * |
| 2875 | Normal colon | SYNGAP1 | 0.0052   | -3.554779 | * |
| 2876 | Normal colon | NEU3    | 0.005925 | -3.553583 | * |
| 2877 | Normal colon | TGFBI   | 0        | -3.529137 | * |
| 2878 | Normal colon | NAT10   | 0.004518 | -3.51483  | * |
| 2879 | Normal colon | SLCO4A1 | 0        | -3.51321  | * |
| 2880 | Normal colon | LASS2   | 0.00613  | -3.511735 | * |
| 2881 | Normal colon | TIMP1   | 0        | -3.500653 | * |
| 2882 | Normal colon | EZH2    | 0.005681 | -3.483052 | * |
| 2883 | Normal colon | PPP2CA  | 0.005558 | -3.478573 | * |
| 2884 | Normal colon | STC2    | 0        | -3.424821 | * |
| 2885 | Normal colon | KPNB1   | 0.004792 | -3.418362 | * |
| 2886 | Normal colon | NOP14   | 0.00466  | -3.39778  | * |
| 2887 | Normal colon | PA2G4   | 0.00274  | -3.385057 | * |
| 2888 | Normal colon | RPN2    | 0.00274  | -3.377154 | * |
| 2889 | Normal colon | HSPH1   | 0        | -3.366472 | * |
| 2890 | Normal colon | RCC2    | 0.005681 | -3.350207 | * |
| 2891 | Normal colon | NOC4L   | 0.003715 | -3.340548 | * |
| 2892 | Normal colon | FIBP    | 0.002702 | -3.321244 | * |
| 2893 | Normal colon | GMPS    | 0.004518 | -3.311997 | * |
| 2894 | Normal colon | SRPR    | 0.005681 | -3.296962 | * |
| 2895 | Normal colon | SSRP1   | 0.00466  | -3.296498 | * |
| 2896 | Normal colon | RUVBL2  | 0.006111 | -3.290995 | * |
| 2897 | Normal colon | OSBPL10 | 0.004146 | -3.287311 | * |
| 2898 | Normal colon | KATNB1  | 0.005681 | -3.285481 | * |

|      |              |           |          |           |   |
|------|--------------|-----------|----------|-----------|---|
| 2899 | Normal colon | GANAB     | 0.00274  | -3.283045 | * |
| 2900 | Normal colon | COPS7A    | 0.00274  | -3.259742 | * |
| 2901 | Normal colon | AACS      | 0.005142 | -3.239776 | * |
| 2902 | Normal colon | RPUSD4    | 0.00274  | -3.207434 | * |
| 2903 | Normal colon | NANP      | 0.004254 | -3.185112 | * |
| 2904 | Normal colon | CPSF4     | 0.004078 | -3.175705 | * |
| 2905 | Normal colon | PHF20     | 0.006116 | -3.164103 | * |
| 2906 | Normal colon | PWP2      | 0.004792 | -3.149072 | * |
| 2907 | Normal colon | NOP56     | 0.00613  | -3.148926 | * |
| 2908 | Normal colon | ZRANB1    | 0.005681 | -3.146275 | * |
| 2909 | Normal colon | PPM1H     | 0        | -3.143884 | * |
| 2910 | Normal colon | DDX50     | 0.002827 | -3.14262  | * |
| 2911 | Normal colon | BUB3      | 0.004182 | -3.142091 | * |
| 2912 | Normal colon | RHOT1     | 0.005681 | -3.134272 | * |
| 2913 | Normal colon | TNFRSF12A | 0        | -3.118433 | * |
| 2914 | Normal colon | PSMF1     | 0.005681 | -3.094299 | * |
| 2915 | Normal colon | DDB1      | 0.004146 | -3.057781 | * |
| 2916 | Normal colon | M6PR      | 0.005681 | -3.035629 | * |
| 2917 | Normal colon | EXTL2     | 0.004146 | -3.033154 | * |
| 2918 | Normal colon | GNS       | 0.004518 | -3.015521 | * |
| 2919 | Normal colon | SLC25A39  | 0.002827 | -3.001813 | * |
| 2920 | Normal colon | STT3A     | 0.00531  | -2.993854 | * |
| 2921 | Normal colon | PAFAH1B2  | 0.00466  | -2.988591 | * |
| 2922 | Normal colon | TMEM39B   | 0.004518 | -2.961722 | * |
| 2923 | Normal colon | NUMBL     | 0.004221 | -2.960859 | * |
| 2924 | Normal colon | FAM134C   | 0.005681 | -2.947311 | * |
| 2925 | Normal colon | ALG3      | 0.005977 | -2.939251 | * |
| 2926 | Normal colon | VPS4A     | 0.005681 | -2.938373 | * |
| 2927 | Normal colon | EDEM2     | 0.00581  | -2.927928 | * |
| 2928 | Normal colon | TRAPPC4   | 0.004101 | -2.913919 | * |
| 2929 | Normal colon | MRPL37    | 0.003331 | -2.913286 | * |
| 2930 | Normal colon | PDIA6     | 0.004518 | -2.90568  | * |
| 2931 | Normal colon | DCPS      | 0.005681 | -2.902001 | * |
| 2932 | Normal colon | AP3M1     | 0.004518 | -2.900102 | * |
| 2933 | Normal colon | TMEM43    | 0.005925 | -2.829317 | * |
| 2934 | Normal colon | TMEM222   | 0.004146 | -2.815126 | * |
| 2935 | Normal colon | RNH1      | 0.004792 | -2.804233 | * |
| 2936 | Normal colon | ZW10      | 0.004351 | -2.787995 | * |
| 2937 | Normal colon | MEN1      | 0.00539  | -2.787758 | * |
| 2938 | Normal colon | DDX54     | 0.003115 | -2.767251 | * |
| 2939 | Normal colon | MLF2      | 0.000543 | -2.764901 | * |
| 2940 | Normal colon | FAM136A   | 0.005777 | -2.752235 | * |
| 2941 | Normal colon | TFAP4     | 0.005681 | -2.735507 | * |
| 2942 | Normal colon | ZNF74     | 0.004146 | -2.735369 | * |
| 2943 | Normal colon | ADSL      | 0.005568 | -2.705135 | * |
| 2944 | Normal colon | POLDIP2   | 0.003715 | -2.671356 | * |
| 2945 | Normal colon | SLC25A15  | 0.005681 | -2.654579 | * |
| 2946 | Normal colon | WSB2      | 0.004391 | -2.622514 | * |
| 2947 | Normal colon | DIABLO    | 0.00466  | -2.621987 | * |
| 2948 | Normal colon | BAT1      | 0.004146 | -2.612366 | * |



|      |              |           |          |           |   |
|------|--------------|-----------|----------|-----------|---|
| 2949 | Normal colon | GSK3A     | 0.00274  | -2.598728 | * |
| 2950 | Normal colon | CSE1L     | 0        | -2.585994 | * |
| 2951 | Normal colon | SHMT2     | 0        | -2.581007 | * |
| 2952 | Normal colon | SNRNP48   | 0.004094 | -2.563389 | * |
| 2953 | Normal colon | DHX30     | 0.003998 | -2.555366 | * |
| 2954 | Normal colon | MYC       | 0        | -2.554701 | * |
| 2955 | Normal colon | GTF3A     | 0        | -2.548275 | * |
| 2956 | Normal colon | INTS5     | 0.00466  | -2.532124 | * |
| 2957 | Normal colon | AP2M1     | 0.004792 | -2.519507 | * |
| 2958 | Normal colon | UBQLN1    | 0.00466  | -2.508627 | * |
| 2959 | Normal colon | DDX55     | 0.00466  | -2.49934  | * |
| 2960 | Normal colon | LIPE      | 0.006116 | -2.478632 | * |
| 2961 | Normal colon | DHX57     | 0.004792 | -2.473856 | * |
| 2962 | Normal colon | TMEM99    | 0.004518 | -2.45     | * |
| 2963 | Normal colon | BOP1      | 0        | -2.427855 | * |
| 2964 | Normal colon | GTF2IRD1  | 0        | -2.424836 | * |
| 2965 | Normal colon | CASC3     | 0.005681 | -2.403027 | * |
| 2966 | Normal colon | HIG2      | 0        | -2.401973 | * |
| 2967 | Normal colon | VDAC3     | 0.004518 | -2.387827 | * |
| 2968 | Normal colon | SEH1L     | 0.004518 | -2.360705 | * |
| 2969 | Normal colon | MED20     | 0.005681 | -2.355722 | * |
| 2970 | Normal colon | DVL2      | 0.004792 | -2.341063 | * |
| 2971 | Normal colon | ODF2      | 0.005925 | -2.309888 | * |
| 2972 | Normal colon | TEAD4     | 0        | -2.27404  | * |
| 2973 | Normal colon | AARSD1    | 0.00613  | -2.270759 | * |
| 2974 | Normal colon | RPS19BP1  | 0.003331 | -2.26466  | * |
| 2975 | Normal colon | RHEBL1    | 0.005681 | -2.261905 | * |
| 2976 | Normal colon | TOP1MT    | 0        | -2.231585 | * |
| 2977 | Normal colon | JAG2      | 0        | -2.227974 | * |
| 2978 | Normal colon | SLC12A2   | 0        | -2.217707 | * |
| 2979 | Normal colon | TGIF2     | 0        | -2.200708 | * |
| 2980 | Normal colon | SIM2      | 0        | -2.181533 | * |
| 2981 | Normal colon | SNTB1     | 0        | -2.173823 | * |
| 2982 | Normal colon | DKC1      | 0        | -2.17118  | * |
| 2983 | Normal colon | ZNF526    | 0.005925 | -2.162342 | * |
| 2984 | Normal colon | REXO2     | 0.005681 | -2.160419 | * |
| 2985 | Normal colon | TPD52L2   | 0.000076 | -2.120266 | * |
| 2986 | Normal colon | FANCE     | 0.005681 | -2.118416 | * |
| 2987 | Normal colon | MTHFD2    | 0        | -2.072072 | * |
| 2988 | Normal colon | TGIF1     | 0        | -2.062134 | * |
| 2989 | Normal colon | LOC388796 | 0        | -2.0231   | * |
| 2990 | Normal colon | CBX2      | 0        | -2.016764 | * |
| 2991 | Normal colon | BDH1      | 0.00027  | 2.003198  | * |
| 2992 | Normal colon | TP53I3    | 0.000116 | 2.067676  | * |
| 2993 | Normal colon | MGC4172   | 0        | 2.094416  | * |
| 2994 | Normal colon | CPT2      | 0        | 2.12269   | * |
| 2995 | Normal colon | PAQR8     | 0.000098 | 2.124901  | * |
| 2996 | Normal colon | MXD1      | 0.000104 | 2.154847  | * |
| 2997 | Normal colon | OSBPL7    | 0        | 2.218376  | * |
| 2998 | Normal colon | IRF4      | 0        | 2.266363  | * |

|      |              |           |          |          |   |
|------|--------------|-----------|----------|----------|---|
| 2999 | Normal colon | CLEC3B    | 0        | 2.369313 | * |
| 3000 | Normal colon | TST       | 0        | 2.41631  | * |
| 3001 | Normal colon | PLCE1     | 0        | 2.444334 | * |
| 3002 | Normal colon | GPD1L     | 0        | 2.445453 | * |
| 3003 | Normal colon | TMPRSS2   | 0        | 2.447403 | * |
| 3004 | Normal colon | CES2      | 0        | 2.491005 | * |
| 3005 | Normal colon | SQRDL     | 0        | 2.493801 | * |
| 3006 | Normal colon | C10orf99  | 0        | 2.501012 | * |
| 3007 | Normal colon | CLIC5     | 0        | 2.517516 | * |
| 3008 | Normal colon | C1orf115  | 0        | 2.557922 | * |
| 3009 | Normal colon | CPM       | 0.000051 | 2.621781 | * |
| 3010 | Normal colon | LOH11CR2A | 0        | 2.644305 | * |
| 3011 | Normal colon | BMP2      | 0        | 2.656796 | * |
| 3012 | Normal colon | C4orf34   | 0.000284 | 2.70772  | * |
| 3013 | Normal colon | MAOA      | 0        | 2.729773 | * |
| 3014 | Normal colon | PAPSS2    | 0        | 2.847457 | * |
| 3015 | Normal colon | C15orf48  | 0        | 2.86025  | * |
| 3016 | Normal colon | LDHD      | 0        | 2.885824 | * |
| 3017 | Normal colon | SULT1A1   | 0.000206 | 2.925544 | * |
| 3018 | Normal colon | CAPN5     | 0        | 2.957012 | * |
| 3019 | Normal colon | TCEA3     | 0        | 3.023788 | * |
| 3020 | Normal colon | CCDC68    | 0.000028 | 3.028445 | * |
| 3021 | Normal colon | CEACAM1   | 0.000043 | 3.080438 | * |
| 3022 | Normal colon | TMEM54    | 0        | 3.098006 | * |
| 3023 | Normal colon | KIAA0828  | 0        | 3.099127 | * |
| 3024 | Normal colon | SCGN      | 0.000292 | 3.132719 | * |
| 3025 | Normal colon | PADI2     | 0        | 3.380171 | * |
| 3026 | Normal colon | TSPAN1    | 0        | 3.412649 | * |
| 3027 | Normal colon | SLC26A2   | 0        | 3.424724 | * |
| 3028 | Normal colon | MALL      | 0        | 3.451365 | * |
| 3029 | Normal colon | GPT       | 0.000045 | 3.535019 | * |
| 3030 | Normal colon | SLC9A2    | 0        | 3.718974 | * |
| 3031 | Normal colon | TUBAL3    | 0        | 3.723097 | * |
| 3032 | Normal colon | SCARA5    | 0        | 3.7548   | * |
| 3033 | Normal colon | GCNT3     | 0        | 3.833073 | * |
| 3034 | Normal colon | MYO1A     | 0        | 3.964463 | * |
| 3035 | Normal colon | EPB41L3   | 0        | 4.068592 | * |
| 3036 | Normal colon | SDCBP2    | 0        | 4.330043 | * |
| 3037 | Normal colon | GPA33     | 0        | 4.331913 | * |
| 3038 | Normal colon | MEP1A     | 0        | 4.336707 | * |
| 3039 | Normal colon | FXD3      | 0        | 4.380328 | * |
| 3040 | Normal colon | HHLA2     | 0        | 4.409889 | * |
| 3041 | Normal colon | SLC16A9   | 0.00274  | 4.44136  | * |
| 3042 | Normal colon | TSPAN7    | 0        | 4.469347 | * |
| 3043 | Normal colon | SLC4A4    | 0.000152 | 4.563736 | * |
| 3044 | Normal colon | MAPK10    | 0.010117 | 4.758095 | * |
| 3045 | Normal colon | PLAC8     | 0        | 5.024936 | * |
| 3046 | Normal colon | CA12      | 0        | 5.0407   | * |
| 3047 | Normal colon | METTL7A   | 0        | 5.071267 | * |
| 3048 | Normal colon | ADH1B     | 0        | 5.287184 | * |



|      |                          |          |          |           |   |
|------|--------------------------|----------|----------|-----------|---|
| 3049 | Normal colon             | HSD11B2  | 0        | 5.500039  | * |
| 3050 | Normal colon             | UGT2B17  | 0        | 5.587305  | * |
| 3051 | Normal colon             | CHP2     | 0        | 5.687153  | * |
| 3052 | Normal colon             | VSIG2    | 0        | 5.798946  | * |
| 3053 | Normal colon             | IGJ      | 0        | 6.442851  | * |
| 3054 | Normal colon             | AKAP5    | 0.000543 | 7.672727  | * |
| 3055 | Normal colon             | HSD17B2  | 0        | 8.104694  | * |
| 3056 | Normal colon             | SLC26A3  | 0        | 9.094399  | * |
| 3057 | Normal colon             | CEACAM7  | 0        | 9.432207  | * |
| 3058 | Normal colon             | ZG16     | 0        | 12.084817 | * |
| 3059 | Normal colon             | FCGBP    | 0        | 12.734993 | * |
| 3060 | Normal colon             | CA2      | 0        | 14.04996  | * |
| 3061 | Normal colon             | GUCA2A   | 0        | 16.142228 | * |
| 3062 | Normal colon             | CA4      | 0        | 16.245571 | * |
| 3063 | Normal colon             | BCAS1    | 0.00466  | 17.453571 | * |
| 3064 | Normal colon             | CA1      | 0        | 19.690103 | * |
| 3065 | Normal colon             | FAM55D   | 0        | 23.508689 | * |
| 3066 | Normal colon             | HPGD     | 0        | 23.718251 | * |
| 3067 | Normal tissue morphology | HSD17B2  | 0        | -7.781235 | * |
| 3068 | Normal tissue morphology | PYY      | 0        | -7.20626  | * |
| 3069 | Normal tissue morphology | PKIB     | 0        | -6.760776 | * |
| 3070 | Normal tissue morphology | MGC13057 | 0        | -6.316289 | * |
| 3071 | Normal tissue morphology | CLEC3B   | 0        | -5.526861 | * |
| 3072 | Normal tissue morphology | SCNN1B   | 0        | -5.373861 | * |
| 3073 | Normal tissue morphology | HPGD     | 0        | -5.351308 | * |
| 3074 | Normal tissue morphology | ADAMDEC1 | 0        | -5.194066 | * |
| 3075 | Normal tissue morphology | FLJ21511 | 0        | -4.982366 | * |
| 3076 | Normal tissue morphology | KLF4     | 0        | -4.841207 | * |
| 3077 | Normal tissue morphology | CLDN23   | 0        | -4.827579 | * |
| 3078 | Normal tissue morphology | SRPX     | 0        | -4.822471 | * |
| 3079 | Normal tissue morphology | MGC4172  | 0        | -4.678043 | * |
| 3080 | Normal tissue morphology | GPT      | 0        | -4.443061 | * |
| 3081 | Normal tissue morphology | SCIN     | 0        | -4.434475 | * |
| 3082 | Normal tissue morphology | CA7      | 0        | -4.360658 | * |
| 3083 | Normal tissue morphology | TSPAN7   | 0        | -4.352056 | * |
| 3084 | Normal tissue morphology | ADH1B    | 0        | -4.346492 | * |
| 3085 | Normal tissue morphology | MYOT     | 0        | -4.164428 | * |
| 3086 | Normal tissue morphology | NR3C2    | 0        | -4.11659  | * |
| 3087 | Normal tissue morphology | EDN3     | 0        | -3.87703  | * |
| 3088 | Normal tissue morphology | FAM107A  | 0        | -3.744748 | * |
| 3089 | Normal tissue morphology | SCGN     | 0        | -3.561313 | * |
| 3090 | Normal tissue morphology | LDHD     | 0        | -3.492451 | * |
| 3091 | Normal tissue morphology | UGDH     | 0        | -3.083284 | * |
| 3092 | Normal tissue morphology | KRT24    | 0        | -2.892109 | * |
| 3093 | Normal tissue morphology | TEAD4    | 0        | -2.851295 | * |
| 3094 | Normal tissue morphology | ACADS    | 0        | -2.83351  | * |
| 3095 | Normal tissue morphology | ENC1     | 0        | -2.780937 | * |
| 3096 | Normal tissue morphology | ENTPD5   | 0        | -2.764317 | * |
| 3097 | Normal tissue morphology | NR5A2    | 0        | -2.707146 | * |
| 3098 | Normal tissue morphology | S100A11  | 0        | -2.650915 | * |

|      |                          |          |          |           |   |
|------|--------------------------|----------|----------|-----------|---|
| 3099 | Normal tissue morphology | PLCE1    | 0        | -2.627492 | * |
| 3100 | Normal tissue morphology | RetSat   | 0        | -2.572066 | * |
| 3101 | Normal tissue morphology | RDH5     | 0        | -2.567677 | * |
| 3102 | Normal tissue morphology | SRI      | 0        | -2.528823 | * |
| 3103 | Normal tissue morphology | HHLA2    | 0        | -2.489899 | * |
| 3104 | Normal tissue morphology | NEDD4L   | 0        | -2.466577 | * |
| 3105 | Normal tissue morphology | MTHFD2   | 0        | -2.406167 | * |
| 3106 | Normal tissue morphology | SPIB     | 0        | -2.38534  | * |
| 3107 | Normal tissue morphology | GNA11    | 0        | -2.359015 | * |
| 3108 | Normal tissue morphology | UGP2     | 0        | -2.354849 | * |
| 3109 | Normal tissue morphology | GCNT2    | 0        | -2.239828 | * |
| 3110 | Normal tissue morphology | ETFDH    | 0        | -2.226034 | * |
| 3111 | Normal tissue morphology | SHMT2    | 0        | -2.205136 | * |
| 3112 | Normal tissue morphology | BRP44L   | 0        | -2.200729 | * |
| 3113 | Normal tissue morphology | DHRS9    | 0        | -2.198375 | * |
| 3114 | Normal tissue morphology | CPT2     | 0        | -2.196555 | * |
| 3115 | Normal tissue morphology | PLCD3    | 0        | -2.104867 | * |
| 3116 | Normal tissue morphology | GLTP     | 0        | -2.101629 | * |
| 3117 | Normal tissue morphology | ZZEF1    | 0        | -2.045019 | * |
| 3118 | Normal tissue morphology | MORC4    | 0        | -2.012692 | * |
| 3119 | Normal tissue morphology | BCAR3    | 0.000012 | 2.114651  | * |
| 3120 | Normal tissue morphology | PRDX6    | 0        | 2.131065  | * |
| 3121 | Normal tissue morphology | SLC1A7   | 0.000001 | 2.224365  | * |
| 3122 | Normal tissue morphology | C20orf20 | 0        | 2.373628  | * |
| 3123 | Normal tissue morphology | STAP2    | 0        | 2.586791  | * |
| 3124 | Normal tissue morphology | CLMN     | 0.000006 | 2.591893  | * |
| 3125 | Normal tissue morphology | SQRDL    | 0.000007 | 2.686297  | * |
| 3126 | Normal tissue morphology | GPD1L    | 0.000012 | 2.724242  | * |
| 3127 | Normal tissue morphology | RIOK3    | 0        | 2.792375  | * |
| 3128 | Normal tissue morphology | MTM1     | 0.000012 | 2.817681  | * |
| 3129 | Normal tissue morphology | VILL     | 0.000003 | 2.882666  | * |
| 3130 | Normal tissue morphology | MYO1A    | 0.000007 | 2.962363  | * |
| 3131 | Normal tissue morphology | FABP1    | 0.000006 | 3.032035  | * |
| 3132 | Normal tissue morphology | IL1R2    | 0.000004 | 3.085178  | * |
| 3133 | Normal tissue morphology | TST      | 0.000001 | 3.086522  | * |
| 3134 | Normal tissue morphology | PAPSS2   | 0.000007 | 3.090265  | * |
| 3135 | Normal tissue morphology | MGC14376 | 0        | 3.22169   | * |
| 3136 | Normal tissue morphology | PPAP2A   | 0        | 3.324126  | * |
| 3137 | Normal tissue morphology | GPA33    | 0.000001 | 3.429682  | * |
| 3138 | Normal tissue morphology | ETV4     | 0        | 3.474337  | * |
| 3139 | Normal tissue morphology | ABHD3    | 0.000008 | 3.47626   | * |
| 3140 | Normal tissue morphology | DSC2     | 0.000004 | 3.593929  | * |
| 3141 | Normal tissue morphology | ETHE1    | 0.000001 | 3.835435  | * |
| 3142 | Normal tissue morphology | STMN2    | 0        | 3.987021  | * |
| 3143 | Normal tissue morphology | FXD3     | 0        | 4.060949  | * |
| 3144 | Normal tissue morphology | PLAC8    | 0.000012 | 4.1363    | * |
| 3145 | Normal tissue morphology | CES2     | 0.000001 | 4.217799  | * |
| 3146 | Normal tissue morphology | FLJ32063 | 0.00001  | 4.349534  | * |
| 3147 | Normal tissue morphology | TSPAN1   | 0.000001 | 4.421269  | * |
| 3148 | Normal tissue morphology | HIGD1A   | 0        | 4.470799  | * |

|      |                          |            |          |             |   |
|------|--------------------------|------------|----------|-------------|---|
| 3149 | Normal tissue morphology | AKR1B10    | 0.000004 | 4.757943    | * |
| 3150 | Normal tissue morphology | SDCBP2     | 0.000001 | 5.00517     | * |
| 3151 | Normal tissue morphology | LRRC19     | 0.000007 | 5.393298    | * |
| 3152 | Normal tissue morphology | CDH3       | 0        | 5.7184      | * |
| 3153 | Normal tissue morphology | KRT20      | 0.00001  | 7.551308    | * |
| 3154 | Normal tissue morphology | SLC4A4     | 0.000001 | 9.124767    | * |
| 3155 | Normal tissue morphology | CA2        | 0.000006 | 9.288727    | * |
| 3156 | Normal tissue morphology | CLDN1      | 0        | 10.740069   | * |
| 3157 | Primary Neoplasm         | CA2        | 0        | -74.544734  | * |
| 3158 | Primary Neoplasm         | ABCA8      | 0        | -4.810661   | * |
| 3159 | Primary Neoplasm         | PLG        | 0.000007 | -3.798711   | * |
| 3160 | Primary Neoplasm         | CTSK       | 0        | 2.261573    | * |
| 3161 | Primary Neoplasm         | IGHG1      | 0        | 2.321187    | * |
| 3162 | Primary Neoplasm         | PDPN       | 0        | 2.501963    | * |
| 3163 | Primary Neoplasm         | COL1A2     | 0        | 2.549568    | * |
| 3164 | Primary Neoplasm         | SULF1      | 0        | 2.936796    | * |
| 3165 | Primary Neoplasm         | COL11A1    | 0        | 4.702894    | * |
| 3166 | Protein p53              | NLRP2      | 0        | -110.051078 | * |
| 3167 | Protein p53              | OGFRL1     | 0.000003 | -12.864371  | * |
| 3168 | Protein p53              | SEPP1      | 0        | -12.288043  | * |
| 3169 | Protein p53              | TUBB6      | 0.000001 | -12.188465  | * |
| 3170 | Protein p53              | FAM92A1    | 0.000008 | -11.867889  | * |
| 3171 | Protein p53              | GAMT       | 0        | -10.974298  | * |
| 3172 | Protein p53              | GJA3       | 0.000018 | -10.47161   | * |
| 3173 | Protein p53              | ID2        | 0.000001 | -10.221989  | * |
| 3174 | Protein p53              | PLAGL1     | 0.000041 | -10.015007  | * |
| 3175 | Protein p53              | OSBPL6     | 0        | -9.871076   | * |
| 3176 | Protein p53              | MOCS1      | 0        | -9.33562    | * |
| 3177 | Protein p53              | ZC3H12C    | 0.000033 | -8.930023   | * |
| 3178 | Protein p53              | MFAP3L     | 0.000033 | -6.479532   | * |
| 3179 | Protein p53              | C1orf115   | 0.00001  | -5.876075   | * |
| 3180 | Protein p53              | FRMD6      | 0.000002 | -5.304811   | * |
| 3181 | Protein p53              | PDGFRL     | 0.000039 | -4.789713   | * |
| 3182 | Protein p53              | RNF144A    | 0.000002 | -4.736778   | * |
| 3183 | Protein p53              | GPR137B    | 0.000096 | -4.529965   | * |
| 3184 | Protein p53              | AIF1L      | 0.000064 | -4.187511   | * |
| 3185 | Protein p53              | PSTPIP2    | 0.000008 | -4.10078    | * |
| 3186 | Protein p53              | FZD2       | 0        | -4.030252   | * |
| 3187 | Protein p53              | ZDHHC2     | 0.000001 | -3.993547   | * |
| 3188 | Protein p53              | SMAD4      | 0.000049 | -3.987658   | * |
| 3189 | Protein p53              | TMEM98     | 0        | -3.881347   | * |
| 3190 | Protein p53              | SLC26A11   | 0.000007 | -3.832825   | * |
| 3191 | Protein p53              | JAG2       | 0.000111 | -3.78717    | * |
| 3192 | Protein p53              | APBB2      | 0.000002 | -3.772794   | * |
| 3193 | Protein p53              | SLC25A37   | 0.000003 | -3.556737   | * |
| 3194 | Protein p53              | PTGES      | 0        | -3.474348   | * |
| 3195 | Protein p53              | ST6GALNAC2 | 0        | -3.444906   | * |
| 3196 | Protein p53              | BTG3       | 0.000026 | -3.443329   | * |
| 3197 | Protein p53              | CLU        | 0.000081 | -3.269041   | * |
| 3198 | Protein p53              | CST6       | 0.000119 | -3.246943   | * |

|      |             |          |          |           |   |
|------|-------------|----------|----------|-----------|---|
| 3199 | Protein p53 | SLC39A6  | 0        | -3.146657 | * |
| 3200 | Protein p53 | PTRF     | 0.000032 | -3.038161 | * |
| 3201 | Protein p53 | CTSL1    | 0.000013 | -3.010972 | * |
| 3202 | Protein p53 | CIRBP    | 0.000044 | -2.97714  | * |
| 3203 | Protein p53 | NAB2     | 0.000002 | -2.897102 | * |
| 3204 | Protein p53 | SGSM1    | 0        | -2.890026 | * |
| 3205 | Protein p53 | C21orf91 | 0        | -2.609282 | * |
| 3206 | Protein p53 | GABBR1   | 0.000003 | -2.587627 | * |
| 3207 | Protein p53 | UBXN8    | 0        | -2.509628 | * |
| 3208 | Protein p53 | STYX     | 0.000003 | -2.447138 | * |
| 3209 | Protein p53 | RPRD1A   | 0.000009 | -2.390988 | * |
| 3210 | Protein p53 | MYO5A    | 0        | -2.367748 | * |
| 3211 | Protein p53 | KANK2    | 0.000005 | -2.367209 | * |
| 3212 | Protein p53 | HEXIM1   | 0.000003 | -2.358521 | * |
| 3213 | Protein p53 | TWSG1    | 0.000017 | -2.305563 | * |
| 3214 | Protein p53 | CENPC1   | 0.000015 | -2.302085 | * |
| 3215 | Protein p53 | RNF138   | 0.000051 | -2.239473 | * |
| 3216 | Protein p53 | PIAS2    | 0.000005 | -2.235642 | * |
| 3217 | Protein p53 | NKX3-1   | 0.000018 | -2.119512 | * |
| 3218 | Protein p53 | C17orf68 | 0.000008 | -2.107659 | * |
| 3219 | Protein p53 | PTPRG    | 0.000062 | -2.084443 | * |
| 3220 | Protein p53 | SMAD2    | 0.000023 | -2.082566 | * |
| 3221 | Protein p53 | SFRS18   | 0        | -2.071387 | * |
| 3222 | Protein p53 | HMG20B   | 0.000004 | -2.058405 | * |
| 3223 | Protein p53 | CCDC69   | 0        | -2.051861 | * |
| 3224 | Protein p53 | TRIM23   | 0        | -2.043023 | * |
| 3225 | Protein p53 | HNF4A    | 0.000009 | 2.034895  | * |
| 3226 | Protein p53 | ZNF630   | 0.000001 | 2.331547  | * |
| 3227 | Protein p53 | PLS1     | 0.00001  | 2.369724  | * |
| 3228 | Protein p53 | ACP6     | 0        | 2.543673  | * |
| 3229 | Protein p53 | SLC2A1   | 0.000044 | 2.562317  | * |
| 3230 | Protein p53 | GOLT1A   | 0.000024 | 2.695651  | * |
| 3231 | Protein p53 | ZFP36L2  | 0.000004 | 2.797318  | * |
| 3232 | Protein p53 | EEPD1    | 0.000002 | 2.850552  | * |
| 3233 | Protein p53 | NT5C3    | 0.000002 | 2.927017  | * |
| 3234 | Protein p53 | FZD5     | 0.000021 | 2.968789  | * |
| 3235 | Protein p53 | ANXA4    | 0.000014 | 3.10173   | * |
| 3236 | Protein p53 | NET1     | 0        | 3.263517  | * |
| 3237 | Protein p53 | KCNE3    | 0.000001 | 3.944067  | * |
| 3238 | Protein p53 | ABHD2    | 0.000006 | 3.99146   | * |
| 3239 | Protein p53 | TAGLN2   | 0        | 4.272309  | * |
| 3240 | Protein p53 | STON2    | 0.000011 | 4.358066  | * |
| 3241 | Protein p53 | CTSC     | 0        | 4.484061  | * |
| 3242 | Protein p53 | SMAD6    | 0.000001 | 4.666987  | * |
| 3243 | Protein p53 | SPNS2    | 0.000025 | 4.766598  | * |
| 3244 | Protein p53 | H2AFJ    | 0        | 5.259377  | * |
| 3245 | Protein p53 | CEACAM1  | 0.000008 | 5.954795  | * |
| 3246 | Protein p53 | GNAS     | 0.000106 | 6.351093  | * |
| 3247 | Protein p53 | TMEM139  | 0.000003 | 6.3594    | * |
| 3248 | Protein p53 | MAML2    | 0.000002 | 7.453422  | * |

|      |                                       |           |          |            |   |
|------|---------------------------------------|-----------|----------|------------|---|
| 3249 | Protein p53                           | MAP2K6    | 0        | 8.252522   | * |
| 3250 | Protein p53                           | HGD       | 0.000002 | 8.781096   | * |
| 3251 | Protein p53                           | TMPRSS2   | 0        | 9.451476   | * |
| 3252 | Protein p53                           | CD24      | 0.000002 | 10.314369  | * |
| 3253 | Protein p53                           | HIST1H2BG | 0.000042 | 10.401582  | * |
| 3254 | Protein p53                           | LRIG1     | 0        | 10.409232  | * |
| 3255 | Protein p53                           | MUC13     | 0.000058 | 11.700251  | * |
| 3256 | Protein p53                           | PMEPA1    | 0.000003 | 12.174786  | * |
| 3257 | Protein p53                           | HKDC1     | 0.000002 | 14.892166  | * |
| 3258 | Protein p53                           | RASSF6    | 0.000001 | 16.482922  | * |
| 3259 | Protein p53                           | SLC22A3   | 0.00001  | 16.487081  | * |
| 3260 | Protein p53                           | ITGB6     | 0.000001 | 16.820715  | * |
| 3261 | Protein p53                           | KIAA1199  | 0        | 17.561393  | * |
| 3262 | Protein p53                           | HNMT      | 0.000005 | 21.776943  | * |
| 3263 | Protein p53                           | LGR5      | 0.000002 | 36.312211  | * |
| 3264 | Protein p53                           | AKR1C3    | 0.000007 | 41.255223  | * |
| 3265 | Protein p53                           | TGFBI     | 0        | 44.172228  | * |
| 3266 | Protein p53                           | AMIGO2    | 0.000001 | 44.444089  | * |
| 3267 | Protein p53                           | TOX3      | 0.000054 | 56.49921   | * |
| 3268 | Protein p53                           | LY75      | 0        | 63.005992  | * |
| 3269 | Protein p53                           | CLRN3     | 0        | 63.568249  | * |
| 3270 | Protein p53                           | S100P     | 0        | 164.471276 | * |
| 3271 | Protein p53                           | GPX2      | 0        | 174.729443 | * |
| 3272 | Protein p53                           | POF1B     | 0        | 256.130843 | * |
| 3273 | Secondary malignant neoplasm of liver | ZG16      | 0        | -31.956839 | * |
| 3274 | Secondary malignant neoplasm of liver | CLCA4     | 0        | -26.707483 | * |
| 3275 | Secondary malignant neoplasm of liver | CA4       | 0        | -15.845909 | * |
| 3276 | Secondary malignant neoplasm of liver | ACTG2     | 0        | -13.707272 | * |
| 3277 | Secondary malignant neoplasm of liver | CLCA1     | 0        | -13.405836 | * |
| 3278 | Secondary malignant neoplasm of liver | CEACAM7   | 0        | -13.361052 | * |
| 3279 | Secondary malignant neoplasm of liver | SPINK4    | 0        | -12.488802 | * |
| 3280 | Secondary malignant neoplasm of liver | FCGBP     | 0        | -11.391719 | * |
| 3281 | Secondary malignant neoplasm of liver | CA1       | 0        | -10.844196 | * |
| 3282 | Secondary malignant neoplasm of liver | VSIG2     | 0        | -9.837015  | * |
| 3283 | Secondary malignant neoplasm of liver | VIP       | 0        | -8.944965  | * |
| 3284 | Secondary malignant neoplasm of liver | IGJ       | 0        | -8.072572  | * |
| 3285 | Secondary malignant neoplasm of liver | MAB21L2   | 0        | -7.859847  | * |
| 3286 | Secondary malignant neoplasm of liver | FAM55D    | 0        | -7.716639  | * |
| 3287 | Secondary malignant neoplasm of liver | MMP3      | 0        | -7.549345  | * |
| 3288 | Secondary malignant neoplasm of liver | AQP8      | 0        | -7.15219   | * |
| 3289 | Secondary malignant neoplasm of liver | MS4A12    | 0        | -6.806925  | * |
| 3290 | Secondary malignant neoplasm of liver | CA2       | 0        | -6.679325  | * |
| 3291 | Secondary malignant neoplasm of liver | FBLN1     | 0        | -5.683315  | * |
| 3292 | Secondary malignant neoplasm of liver | ADAMDEC1  | 0        | -5.236325  | * |
| 3293 | Secondary malignant neoplasm of liver | VWF       | 0        | -4.529824  | * |
| 3294 | Secondary malignant neoplasm of liver | C6ORF105  | 0        | -4.303634  | * |
| 3295 | Secondary malignant neoplasm of liver | SPARCL1   | 0        | -4.05342   | * |
| 3296 | Secondary malignant neoplasm of liver | TPSG1     | 0        | -3.941812  | * |
| 3297 | Secondary malignant neoplasm of liver | MYH11     | 0        | -3.895139  | * |
| 3298 | Secondary malignant neoplasm of liver | IL1R2     | 0        | -3.846801  | * |



|      |                                                    |          |          |            |   |
|------|----------------------------------------------------|----------|----------|------------|---|
| 3299 | Secondary malignant neoplasm of liver              | TCF21    | 0        | -3.700641  | * |
| 3300 | Secondary malignant neoplasm of liver              | PIGR     | 0        | -3.622438  | * |
| 3301 | Secondary malignant neoplasm of liver              | TSPAN1   | 0.000001 | -3.277753  | * |
| 3302 | Secondary malignant neoplasm of liver              | PYY      | 0        | -3.042799  | * |
| 3303 | Secondary malignant neoplasm of liver              | CD79A    | 0        | -2.942539  | * |
| 3304 | Secondary malignant neoplasm of liver              | ITM2C    | 0.000001 | -2.872164  | * |
| 3305 | Secondary malignant neoplasm of liver              | BCAS1    | 0        | -2.845971  | * |
| 3306 | Secondary malignant neoplasm of liver              | PLAC8    | 0        | -2.810572  | * |
| 3307 | Secondary malignant neoplasm of liver              | FOXF1    | 0        | -2.736251  | * |
| 3308 | Secondary malignant neoplasm of liver              | CPA3     | 0        | -2.60624   | * |
| 3309 | Secondary malignant neoplasm of liver              | SDCBP2   | 0.000331 | -2.495947  | * |
| 3310 | Secondary malignant neoplasm of liver              | DIO2     | 0        | -2.431205  | * |
| 3311 | Secondary malignant neoplasm of liver              | DDR2     | 0        | -2.222107  | * |
| 3312 | Secondary malignant neoplasm of liver              | LGALS4   | 0.000004 | -2.055385  | * |
| 3313 | Secondary malignant neoplasm of liver              | COLEC11  | 0        | 5.278582   | * |
| 3314 | Secondary malignant neoplasm of liver              | HP       | 0.000009 | 21.852969  | * |
| 3315 | Secondary malignant neoplasm of liver              | CRP      | 0.000002 | 25.311911  | * |
| 3316 | Transcriptional Coactivator with PDZ-Binding Motif | WWTR1    | 0        | -14.386729 | * |
| 3317 | Transcriptional Coactivator with PDZ-Binding Motif | TSPAN6   | 0        | -11.611641 | * |
| 3318 | Transcriptional Coactivator with PDZ-Binding Motif | HMGA2    | 0        | -10.672552 | * |
| 3319 | Transcriptional Coactivator with PDZ-Binding Motif | DDAH1    | 0        | -7.025009  | * |
| 3320 | Transcriptional Coactivator with PDZ-Binding Motif | BRP44    | 0.000004 | -6.554565  | * |
| 3321 | Transcriptional Coactivator with PDZ-Binding Motif | SH3D19   | 0        | -5.241574  | * |
| 3322 | Transcriptional Coactivator with PDZ-Binding Motif | CD109    | 0        | -5.112988  | * |
| 3323 | Transcriptional Coactivator with PDZ-Binding Motif | MAT2B    | 0        | -4.798222  | * |
| 3324 | Transcriptional Coactivator with PDZ-Binding Motif | RAB8B    | 0        | -4.642816  | * |
| 3325 | Transcriptional Coactivator with PDZ-Binding Motif | SLC7A5   | 0        | -4.640135  | * |
| 3326 | Transcriptional Coactivator with PDZ-Binding Motif | MED14    | 0        | -4.589488  | * |
| 3327 | Transcriptional Coactivator with PDZ-Binding Motif | ITGAV    | 0        | -4.570969  | * |
| 3328 | Transcriptional Coactivator with PDZ-Binding Motif | FAM96A   | 0        | -4.257481  | * |
| 3329 | Transcriptional Coactivator with PDZ-Binding Motif | E2F8     | 0.000001 | -4.16024   | * |
| 3330 | Transcriptional Coactivator with PDZ-Binding Motif | C9orf41  | 0.000001 | -3.904127  | * |
| 3331 | Transcriptional Coactivator with PDZ-Binding Motif | GLO1     | 0        | -3.823781  | * |
| 3332 | Transcriptional Coactivator with PDZ-Binding Motif | RSPRY1   | 0        | -3.736446  | * |
| 3333 | Transcriptional Coactivator with PDZ-Binding Motif | STMN3    | 0.000002 | -3.611254  | * |
| 3334 | Transcriptional Coactivator with PDZ-Binding Motif | PRC1     | 0        | -3.506423  | * |
| 3335 | Transcriptional Coactivator with PDZ-Binding Motif | USP38    | 0        | -3.456152  | * |
| 3336 | Transcriptional Coactivator with PDZ-Binding Motif | GPCPD1   | 0        | -3.424358  | * |
| 3337 | Transcriptional Coactivator with PDZ-Binding Motif | DCTN4    | 0        | -3.41054   | * |
| 3338 | Transcriptional Coactivator with PDZ-Binding Motif | UBE2E2   | 0        | -3.258407  | * |
| 3339 | Transcriptional Coactivator with PDZ-Binding Motif | IPO8     | 0.000003 | -3.256525  | * |
| 3340 | Transcriptional Coactivator with PDZ-Binding Motif | C9orf64  | 0.000001 | -3.24901   | * |
| 3341 | Transcriptional Coactivator with PDZ-Binding Motif | TMEM167A | 0.000002 | -3.247133  | * |
| 3342 | Transcriptional Coactivator with PDZ-Binding Motif | SSR1     | 0        | -3.169305  | * |
| 3343 | Transcriptional Coactivator with PDZ-Binding Motif | TGFBR1   | 0        | -3.165646  | * |
| 3344 | Transcriptional Coactivator with PDZ-Binding Motif | RANBP9   | 0        | -3.134713  | * |
| 3345 | Transcriptional Coactivator with PDZ-Binding Motif | HPS3     | 0        | -3.091556  | * |
| 3346 | Transcriptional Coactivator with PDZ-Binding Motif | RBM18    | 0        | -3.07375   | * |
| 3347 | Transcriptional Coactivator with PDZ-Binding Motif | PDCD6    | 0        | -3.007018  | * |
| 3348 | Transcriptional Coactivator with PDZ-Binding Motif | PTP4A1   | 0        | -2.977634  | * |

|      |                                                 |          |          |           |   |
|------|-------------------------------------------------|----------|----------|-----------|---|
| 3349 | Transcriptional Coactivator with PDZ-Binding Mo | LMNB1    | 0.000001 | -2.974197 | * |
| 3350 | Transcriptional Coactivator with PDZ-Binding Mo | TWSG1    | 0        | -2.907945 | * |
| 3351 | Transcriptional Coactivator with PDZ-Binding Mo | NECAP1   | 0        | -2.904588 | * |
| 3352 | Transcriptional Coactivator with PDZ-Binding Mo | TMEM182  | 0        | -2.899559 | * |
| 3353 | Transcriptional Coactivator with PDZ-Binding Mo | SERPINH1 | 0        | -2.869568 | * |
| 3354 | Transcriptional Coactivator with PDZ-Binding Mo | ADI1     | 0.000003 | -2.861292 | * |
| 3355 | Transcriptional Coactivator with PDZ-Binding Mo | SGMS2    | 0.000001 | -2.857988 | * |
| 3356 | Transcriptional Coactivator with PDZ-Binding Mo | ACBD5    | 0        | -2.844812 | * |
| 3357 | Transcriptional Coactivator with PDZ-Binding Mo | UBFD1    | 0        | -2.813761 | * |
| 3358 | Transcriptional Coactivator with PDZ-Binding Mo | FAM36A   | 0        | -2.80889  | * |
| 3359 | Transcriptional Coactivator with PDZ-Binding Mo | FBXO28   | 0.000002 | -2.794325 | * |
| 3360 | Transcriptional Coactivator with PDZ-Binding Mo | C17orf75 | 0        | -2.770219 | * |
| 3361 | Transcriptional Coactivator with PDZ-Binding Mo | UBASH3B  | 0        | -2.768619 | * |
| 3362 | Transcriptional Coactivator with PDZ-Binding Mo | MEST     | 0.000002 | -2.694467 | * |
| 3363 | Transcriptional Coactivator with PDZ-Binding Mo | C20orf24 | 0        | -2.646649 | * |
| 3364 | Transcriptional Coactivator with PDZ-Binding Mo | DDI2     | 0        | -2.642066 | * |
| 3365 | Transcriptional Coactivator with PDZ-Binding Mo | FASTKD1  | 0        | -2.642066 | * |
| 3366 | Transcriptional Coactivator with PDZ-Binding Mo | FBXO9    | 0        | -2.614738 | * |
| 3367 | Transcriptional Coactivator with PDZ-Binding Mo | DPY19L4  | 0        | -2.592181 | * |
| 3368 | Transcriptional Coactivator with PDZ-Binding Mo | SRI      | 0.000005 | -2.575763 | * |
| 3369 | Transcriptional Coactivator with PDZ-Binding Mo | GMCL1    | 0        | -2.574276 | * |
| 3370 | Transcriptional Coactivator with PDZ-Binding Mo | C12orf4  | 0.000002 | -2.552068 | * |
| 3371 | Transcriptional Coactivator with PDZ-Binding Mo | RBL2     | 0        | -2.549121 | * |
| 3372 | Transcriptional Coactivator with PDZ-Binding Mo | COMT     | 0.000002 | -2.546178 | * |
| 3373 | Transcriptional Coactivator with PDZ-Binding Mo | FAM117B  | 0        | -2.544708 | * |
| 3374 | Transcriptional Coactivator with PDZ-Binding Mo | EBAG9    | 0        | -2.525671 | * |
| 3375 | Transcriptional Coactivator with PDZ-Binding Mo | ACTR2    | 0.000001 | -2.506776 | * |
| 3376 | Transcriptional Coactivator with PDZ-Binding Mo | C1GALT1  | 0        | -2.502436 | * |
| 3377 | Transcriptional Coactivator with PDZ-Binding Mo | PURB     | 0        | -2.486587 | * |
| 3378 | Transcriptional Coactivator with PDZ-Binding Mo | MRPS2    | 0.000001 | -2.485151 | * |
| 3379 | Transcriptional Coactivator with PDZ-Binding Mo | ANP32E   | 0.000001 | -2.483716 | * |
| 3380 | Transcriptional Coactivator with PDZ-Binding Mo | CDH1     | 0        | -2.479415 | * |
| 3381 | Transcriptional Coactivator with PDZ-Binding Mo | GLS      | 0.000002 | -2.429793 | * |
| 3382 | Transcriptional Coactivator with PDZ-Binding Mo | RAP2C    | 0        | -2.425586 | * |
| 3383 | Transcriptional Coactivator with PDZ-Binding Mo | MAPKSP1  | 0        | -2.419988 | * |
| 3384 | Transcriptional Coactivator with PDZ-Binding Mo | MAPKAP1  | 0        | -2.390811 | * |
| 3385 | Transcriptional Coactivator with PDZ-Binding Mo | ANKFY1   | 0        | -2.390811 | * |
| 3386 | Transcriptional Coactivator with PDZ-Binding Mo | PRIM2    | 0.000003 | -2.34567  | * |
| 3387 | Transcriptional Coactivator with PDZ-Binding Mo | PRDX6    | 0        | -2.324091 | * |
| 3388 | Transcriptional Coactivator with PDZ-Binding Mo | ARIH2    | 0.000005 | -2.320067 | * |
| 3389 | Transcriptional Coactivator with PDZ-Binding Mo | AP3M1    | 0        | -2.284165 | * |
| 3390 | Transcriptional Coactivator with PDZ-Binding Mo | UPP1     | 0.000003 | -2.284165 | * |
| 3391 | Transcriptional Coactivator with PDZ-Binding Mo | DNAJC16  | 0.000003 | -2.28021  | * |
| 3392 | Transcriptional Coactivator with PDZ-Binding Mo | MPPE1    | 0        | -2.277577 | * |
| 3393 | Transcriptional Coactivator with PDZ-Binding Mo | WDFY1    | 0        | -2.274948 | * |
| 3394 | Transcriptional Coactivator with PDZ-Binding Mo | DYNC1LI1 | 0        | -2.272321 | * |
| 3395 | Transcriptional Coactivator with PDZ-Binding Mo | HIGD1A   | 0.000001 | -2.265768 | * |
| 3396 | Transcriptional Coactivator with PDZ-Binding Mo | KCMF1    | 0.000002 | -2.263152 | * |
| 3397 | Transcriptional Coactivator with PDZ-Binding Mo | SLC39A10 | 0        | -2.246221 | * |
| 3398 | Transcriptional Coactivator with PDZ-Binding Mo | TTC26    | 0        | -2.222988 | * |

|      |                                                 |          |          |           |   |
|------|-------------------------------------------------|----------|----------|-----------|---|
| 3399 | Transcriptional Coactivator with PDZ-Binding Mo | ZNF148   | 0.000001 | -2.220421 | * |
| 3400 | Transcriptional Coactivator with PDZ-Binding Mo | ECHDC1   | 0        | -2.207632 | * |
| 3401 | Transcriptional Coactivator with PDZ-Binding Mo | AFF4     | 0        | -2.19365  | * |
| 3402 | Transcriptional Coactivator with PDZ-Binding Mo | C6orf162 | 0.000002 | -2.188587 | * |
| 3403 | Transcriptional Coactivator with PDZ-Binding Mo | UGGT1    | 0        | -2.163449 | * |
| 3404 | Transcriptional Coactivator with PDZ-Binding Mo | CMTM4    | 0        | -2.155964 | * |
| 3405 | Transcriptional Coactivator with PDZ-Binding Mo | TMEM30A  | 0.000002 | -2.152232 | * |
| 3406 | Transcriptional Coactivator with PDZ-Binding Mo | SYNCRIP  | 0        | -2.126283 | * |
| 3407 | Transcriptional Coactivator with PDZ-Binding Mo | SP3      | 0        | -2.125055 | * |
| 3408 | Transcriptional Coactivator with PDZ-Binding Mo | MAPRE1   | 0        | -2.125055 | * |
| 3409 | Transcriptional Coactivator with PDZ-Binding Mo | ZMAT3    | 0        | -2.122601 | * |
| 3410 | Transcriptional Coactivator with PDZ-Binding Mo | TIMM17A  | 0        | -2.117703 | * |
| 3411 | Transcriptional Coactivator with PDZ-Binding Mo | TAGLN2   | 0        | -2.11648  | * |
| 3412 | Transcriptional Coactivator with PDZ-Binding Mo | RCAN3    | 0.000004 | -2.098221 | * |
| 3413 | Transcriptional Coactivator with PDZ-Binding Mo | EPHB4    | 0        | -2.084932 | * |
| 3414 | Transcriptional Coactivator with PDZ-Binding Mo | SF3A1    | 0.000001 | -2.083728 | * |
| 3415 | Transcriptional Coactivator with PDZ-Binding Mo | MRS2     | 0.000001 | -2.072923 | * |
| 3416 | Transcriptional Coactivator with PDZ-Binding Mo | ANKRD29  | 0.000002 | -2.072923 | * |
| 3417 | Transcriptional Coactivator with PDZ-Binding Mo | CERK     | 0        | -2.05504  | * |
| 3418 | Transcriptional Coactivator with PDZ-Binding Mo | HSBP1    | 0.000005 | -2.049114 | * |
| 3419 | Transcriptional Coactivator with PDZ-Binding Mo | EARS2    | 0.000001 | -2.04793  | * |
| 3420 | Transcriptional Coactivator with PDZ-Binding Mo | MAEA     | 0.000001 | -2.040845 | * |
| 3421 | Transcriptional Coactivator with PDZ-Binding Mo | STK24    | 0        | -2.037312 | * |
| 3422 | Transcriptional Coactivator with PDZ-Binding Mo | NMD3     | 0.000002 | -2.034959 | * |
| 3423 | Transcriptional Coactivator with PDZ-Binding Mo | CXADR    | 0        | -2.024408 | * |
| 3424 | Transcriptional Coactivator with PDZ-Binding Mo | FBXO7    | 0.000002 | -2.012748 | * |
| 3425 | Transcriptional Coactivator with PDZ-Binding Mo | CACHD1   | 0        | 2.039667  | * |
| 3426 | Transcriptional Coactivator with PDZ-Binding Mo | GRAMD3   | 0        | 2.057416  | * |
| 3427 | Transcriptional Coactivator with PDZ-Binding Mo | IL8      | 0.000001 | 2.066945  | * |
| 3428 | Transcriptional Coactivator with PDZ-Binding Mo | NRP1     | 0.000004 | 2.081322  | * |
| 3429 | Transcriptional Coactivator with PDZ-Binding Mo | GPNMB    | 0.000004 | 2.083728  | * |
| 3430 | Transcriptional Coactivator with PDZ-Binding Mo | CHST11   | 0        | 2.105506  | * |
| 3431 | Transcriptional Coactivator with PDZ-Binding Mo | DNAJC18  | 0        | 2.141072  | * |
| 3432 | Transcriptional Coactivator with PDZ-Binding Mo | KIAA0040 | 0        | 2.183537  | * |
| 3433 | Transcriptional Coactivator with PDZ-Binding Mo | PPP2R1B  | 0.000003 | 2.194917  | * |
| 3434 | Transcriptional Coactivator with PDZ-Binding Mo | DCP2     | 0        | 2.221704  | * |
| 3435 | Transcriptional Coactivator with PDZ-Binding Mo | DOCK4    | 0        | 2.242332  | * |
| 3436 | Transcriptional Coactivator with PDZ-Binding Mo | CLEC1A   | 0        | 2.285484  | * |
| 3437 | Transcriptional Coactivator with PDZ-Binding Mo | C7orf41  | 0.000002 | 2.300052  | * |
| 3438 | Transcriptional Coactivator with PDZ-Binding Mo | KIAA1324 | 0.000005 | 2.349738  | * |
| 3439 | Transcriptional Coactivator with PDZ-Binding Mo | TTL7     | 0.000001 | 2.353813  | * |
| 3440 | Transcriptional Coactivator with PDZ-Binding Mo | STX3     | 0.000002 | 2.379788  | * |
| 3441 | Transcriptional Coactivator with PDZ-Binding Mo | KDELC1   | 0        | 2.394957  | * |
| 3442 | Transcriptional Coactivator with PDZ-Binding Mo | SLC35B4  | 0        | 2.415798  | * |
| 3443 | Transcriptional Coactivator with PDZ-Binding Mo | LPXN     | 0.000004 | 2.519842  | * |
| 3444 | Transcriptional Coactivator with PDZ-Binding Mo | CCDC50   | 0        | 2.532976  | * |
| 3445 | Transcriptional Coactivator with PDZ-Binding Mo | GDF15    | 0.000001 | 2.550594  | * |
| 3446 | Transcriptional Coactivator with PDZ-Binding Mo | ATP8B2   | 0.000001 | 2.559449  | * |
| 3447 | Transcriptional Coactivator with PDZ-Binding Mo | PAG1     | 0        | 2.608704  | * |
| 3448 | Transcriptional Coactivator with PDZ-Binding Mo | RMND5A   | 0        | 2.719485  | * |



|      |                                                 |            |          |            |   |
|------|-------------------------------------------------|------------|----------|------------|---|
| 3449 | Transcriptional Coactivator with PDZ-Binding Mo | IFRD1      | 0        | 2.733659   | * |
| 3450 | Transcriptional Coactivator with PDZ-Binding Mo | ISG20      | 0.000005 | 2.830061   | * |
| 3451 | Transcriptional Coactivator with PDZ-Binding Mo | ZFYVE26    | 0        | 2.843169   | * |
| 3452 | Transcriptional Coactivator with PDZ-Binding Mo | SRPX       | 0        | 2.864599   | * |
| 3453 | Transcriptional Coactivator with PDZ-Binding Mo | PELI2      | 0        | 2.975915   | * |
| 3454 | Transcriptional Coactivator with PDZ-Binding Mo | BEX4       | 0.000003 | 2.975915   | * |
| 3455 | Transcriptional Coactivator with PDZ-Binding Mo | SLC4A8     | 0.000001 | 3.303892   | * |
| 3456 | Transcriptional Coactivator with PDZ-Binding Mo | CYP39A1    | 0        | 3.334568   | * |
| 3457 | Transcriptional Coactivator with PDZ-Binding Mo | FAM46C     | 0        | 3.338423   | * |
| 3458 | Transcriptional Coactivator with PDZ-Binding Mo | CYFIP2     | 0.000001 | 3.430297   | * |
| 3459 | Transcriptional Coactivator with PDZ-Binding Mo | ABCB1      | 0        | 3.655326   | * |
| 3460 | Transcriptional Coactivator with PDZ-Binding Mo | NOV        | 0.000001 | 3.717072   | * |
| 3461 | Transcriptional Coactivator with PDZ-Binding Mo | FABP3      | 0.000003 | 3.931282   | * |
| 3462 | Transcriptional Coactivator with PDZ-Binding Mo | NUDT11     | 0        | 3.990769   | * |
| 3463 | Transcriptional Coactivator with PDZ-Binding Mo | DNM3       | 0.000002 | 4.095861   | * |
| 3464 | Transcriptional Coactivator with PDZ-Binding Mo | HPCAL4     | 0        | 4.555155   | * |
| 3465 | Transcriptional Coactivator with PDZ-Binding Mo | CNTN1      | 0.000001 | 4.921734   | * |
| 3466 | Transcriptional Coactivator with PDZ-Binding Mo | GZMA       | 0.000002 | 5.101188   | * |
| 3467 | Transcriptional Coactivator with PDZ-Binding Mo | SLC40A1    | 0.000001 | 6.165281   | * |
| 3468 | Transcriptional Coactivator with PDZ-Binding Mo | MUC16      | 0        | 6.356944   | * |
| 3469 | Transcriptional Coactivator with PDZ-Binding Mo | GNG2       | 0        | 6.848715   | * |
| 3470 | Transcriptional Coactivator with PDZ-Binding Mo | MUM1L1     | 0        | 7.000704   | * |
| 3471 | Transcriptional Coactivator with PDZ-Binding Mo | IL24       | 0        | 7.700756   | * |
| 3472 | Transcriptional Coactivator with PDZ-Binding Mo | KANK4      | 0        | 8.121052   | * |
| 3473 | Transcriptional Coactivator with PDZ-Binding Mo | LPPR4      | 0        | 11.145067  | * |
| 3474 | Transcriptional Coactivator with PDZ-Binding Mo | VAT1L      | 0        | 14.604422  | * |
| 3475 | [D]Change in bowel habit                        | CCL19      | 0.037172 | -1.740825  |   |
| 3476 | [D]Change in bowel habit                        | LTB        | 0.005796 | -1.62032   |   |
| 3477 | [D]Change in bowel habit                        | CXCL13     | 0.044292 | -1.556556  |   |
| 3478 | [D]Change in bowel habit                        | HLA-DQB1   | 0.029771 | -1.533981  |   |
| 3479 | [M]Adenocarcinoma, metastatic, NOS              | MMP3       | 0        | -12.325909 |   |
| 3480 | [M]Adenocarcinoma, metastatic, NOS              | ZG16       | 0        | -10.328443 |   |
| 3481 | [M]Adenocarcinoma, metastatic, NOS              | CA1        | 0        | -8.678027  |   |
| 3482 | [M]Adenocarcinoma, metastatic, NOS              | CLCA4      | 0        | -8.27553   |   |
| 3483 | [M]Adenocarcinoma, metastatic, NOS              | ITLN1      | 0        | -7.726315  |   |
| 3484 | [M]Adenocarcinoma, metastatic, NOS              | MS4A12     | 0        | -6.291874  |   |
| 3485 | [M]Adenocarcinoma, metastatic, NOS              | CLCA1      | 0        | -6.180429  |   |
| 3486 | [M]Adenocarcinoma, metastatic, NOS              | NKX2-3     | 0        | -5.14191   |   |
| 3487 | [M]Adenocarcinoma, metastatic, NOS              | SPINK4     | 0        | -5.116714  |   |
| 3488 | [M]Adenocarcinoma, metastatic, NOS              | CA4        | 0        | -5.097768  |   |
| 3489 | [M]Adenocarcinoma, metastatic, NOS              | DES        | 0        | -4.777964  |   |
| 3490 | [M]Adenocarcinoma, metastatic, NOS              | CXCL5      | 0        | -4.741591  |   |
| 3491 | [M]Adenocarcinoma, metastatic, NOS              | FCGBP      | 0        | -4.299719  |   |
| 3492 | [M]Adenocarcinoma, metastatic, NOS              | GPR109B    | 0        | -4.22727   |   |
| 3493 | [M]Adenocarcinoma, metastatic, NOS              | MAB21L2    | 0        | -3.972382  |   |
| 3494 | [M]Adenocarcinoma, metastatic, NOS              | DUOX2      | 0        | -3.895751  |   |
| 3495 | [M]Adenocarcinoma, metastatic, NOS              | ACTG2      | 0        | -3.768196  |   |
| 3496 | [M]Adenocarcinoma, metastatic, NOS              | ST6GALNAC1 | 0        | -3.708631  |   |
| 3497 | [M]Adenocarcinoma, metastatic, NOS              | MUC2       | 0.000153 | -3.660982  |   |
| 3498 | [M]Adenocarcinoma, metastatic, NOS              | MYH11      | 0        | -3.650643  |   |

|      |                                    |           |          |           |  |
|------|------------------------------------|-----------|----------|-----------|--|
| 3499 | [M]Adenocarcinoma, metastatic, NOS | VIP       | 0        | -3.608082 |  |
| 3500 | [M]Adenocarcinoma, metastatic, NOS | AQP8      | 0.000283 | -3.606689 |  |
| 3501 | [M]Adenocarcinoma, metastatic, NOS | PIGR      | 0        | -3.54694  |  |
| 3502 | [M]Adenocarcinoma, metastatic, NOS | CEACAM7   | 0        | -3.457317 |  |
| 3503 | [M]Adenocarcinoma, metastatic, NOS | SYNM      | 0.000003 | -3.429671 |  |
| 3504 | [M]Adenocarcinoma, metastatic, NOS | PI3       | 0.000001 | -3.26821  |  |
| 3505 | [M]Adenocarcinoma, metastatic, NOS | CNN1      | 0.000002 | -3.189323 |  |
| 3506 | [M]Adenocarcinoma, metastatic, NOS | IGJ       | 0        | -3.153647 |  |
| 3507 | [M]Adenocarcinoma, metastatic, NOS | GPR120    | 0        | -3.090857 |  |
| 3508 | [M]Adenocarcinoma, metastatic, NOS | SLC26A3   | 0.000002 | -3.052374 |  |
| 3509 | [M]Adenocarcinoma, metastatic, NOS | SYNPO2    | 0        | -3.051997 |  |
| 3510 | [M]Adenocarcinoma, metastatic, NOS | MUC4      | 0.00002  | -3.016173 |  |
| 3511 | [M]Adenocarcinoma, metastatic, NOS | GUCA2A    | 0.000014 | -3.013317 |  |
| 3512 | [M]Adenocarcinoma, metastatic, NOS | TRPA1     | 0        | -3.007264 |  |
| 3513 | [M]Adenocarcinoma, metastatic, NOS | PLA2G2A   | 0        | -2.977722 |  |
| 3514 | [M]Adenocarcinoma, metastatic, NOS | CHRD1     | 0.00006  | -2.90997  |  |
| 3515 | [M]Adenocarcinoma, metastatic, NOS | SCARA5    | 0        | -2.875792 |  |
| 3516 | [M]Adenocarcinoma, metastatic, NOS | ASB2      | 0        | -2.866584 |  |
| 3517 | [M]Adenocarcinoma, metastatic, NOS | PLN       | 0.000004 | -2.78013  |  |
| 3518 | [M]Adenocarcinoma, metastatic, NOS | CASQ2     | 0.000029 | -2.774595 |  |
| 3519 | [M]Adenocarcinoma, metastatic, NOS | PLAC8     | 0        | -2.765247 |  |
| 3520 | [M]Adenocarcinoma, metastatic, NOS | IGHM      | 0.000027 | -2.749567 |  |
| 3521 | [M]Adenocarcinoma, metastatic, NOS | LOC646627 | 0.00001  | -2.725    |  |
| 3522 | [M]Adenocarcinoma, metastatic, NOS | C6orf105  | 0        | -2.709693 |  |
| 3523 | [M]Adenocarcinoma, metastatic, NOS | TNFRSF17  | 0.000002 | -2.702203 |  |
| 3524 | [M]Adenocarcinoma, metastatic, NOS | GREM1     | 0        | -2.701485 |  |
| 3525 | [M]Adenocarcinoma, metastatic, NOS | FOXF1     | 0        | -2.682872 |  |
| 3526 | [M]Adenocarcinoma, metastatic, NOS | PCDH18    | 0        | -2.649088 |  |
| 3527 | [M]Adenocarcinoma, metastatic, NOS | CCL11     | 0        | -2.618263 |  |
| 3528 | [M]Adenocarcinoma, metastatic, NOS | LMOD1     | 0        | -2.614908 |  |
| 3529 | [M]Adenocarcinoma, metastatic, NOS | DHRS9     | 0        | -2.591567 |  |
| 3530 | [M]Adenocarcinoma, metastatic, NOS | IL1B      | 0        | -2.580174 |  |
| 3531 | [M]Adenocarcinoma, metastatic, NOS | DUOXA2    | 0.000001 | -2.535967 |  |
| 3532 | [M]Adenocarcinoma, metastatic, NOS | CXCL1     | 0        | -2.512596 |  |
| 3533 | [M]Adenocarcinoma, metastatic, NOS | ADAMDEC1  | 0        | -2.512056 |  |
| 3534 | [M]Adenocarcinoma, metastatic, NOS | TSPAN11   | 0        | -2.459401 |  |
| 3535 | [M]Adenocarcinoma, metastatic, NOS | IGHA1     | 0.000001 | -2.447489 |  |
| 3536 | [M]Adenocarcinoma, metastatic, NOS | FAM55A    | 0        | -2.436927 |  |
| 3537 | [M]Adenocarcinoma, metastatic, NOS | LCN2      | 0.000232 | -2.434002 |  |
| 3538 | [M]Adenocarcinoma, metastatic, NOS | ARL14     | 0        | -2.410036 |  |
| 3539 | [M]Adenocarcinoma, metastatic, NOS | IGL@      | 0.000011 | -2.408791 |  |
| 3540 | [M]Adenocarcinoma, metastatic, NOS | IGLC7     | 0.000005 | -2.407871 |  |
| 3541 | [M]Adenocarcinoma, metastatic, NOS | MYOCD     | 0.000027 | -2.407244 |  |
| 3542 | [M]Adenocarcinoma, metastatic, NOS | CXCL11    | 0.000293 | -2.399521 |  |
| 3543 | [M]Adenocarcinoma, metastatic, NOS | IGHD      | 0.000086 | -2.398826 |  |
| 3544 | [M]Adenocarcinoma, metastatic, NOS | IL8       | 0.000031 | -2.381619 |  |
| 3545 | [M]Adenocarcinoma, metastatic, NOS | HOXD13    | 0.000237 | -2.319667 |  |
| 3546 | [M]Adenocarcinoma, metastatic, NOS | NR3C2     | 0        | -2.310118 |  |
| 3547 | [M]Adenocarcinoma, metastatic, NOS | CES3      | 0        | -2.308536 |  |
| 3548 | [M]Adenocarcinoma, metastatic, NOS | GCNT3     | 0.000002 | -2.296123 |  |

|      |                                    |           |          |             |  |
|------|------------------------------------|-----------|----------|-------------|--|
| 3549 | [M]Adenocarcinoma, metastatic, NOS | TPSG1     | 0        | -2.286308   |  |
| 3550 | [M]Adenocarcinoma, metastatic, NOS | IGKC      | 0.000003 | -2.260557   |  |
| 3551 | [M]Adenocarcinoma, metastatic, NOS | TTLL6     | 0.000037 | -2.253982   |  |
| 3552 | [M]Adenocarcinoma, metastatic, NOS | CXCL3     | 0        | -2.244682   |  |
| 3553 | [M]Adenocarcinoma, metastatic, NOS | PTGER4    | 0.000059 | -2.243168   |  |
| 3554 | [M]Adenocarcinoma, metastatic, NOS | CFD       | 0.000028 | -2.220972   |  |
| 3555 | [M]Adenocarcinoma, metastatic, NOS | CCL20     | 0.000002 | -2.202755   |  |
| 3556 | [M]Adenocarcinoma, metastatic, NOS | CLC       | 0.000002 | -2.199556   |  |
| 3557 | [M]Adenocarcinoma, metastatic, NOS | UGT8      | 0        | -2.160099   |  |
| 3558 | [M]Adenocarcinoma, metastatic, NOS | PGM5      | 0        | -2.140712   |  |
| 3559 | [M]Adenocarcinoma, metastatic, NOS | ITM2C     | 0        | -2.137483   |  |
| 3560 | [M]Adenocarcinoma, metastatic, NOS | NEGR1     | 0.00022  | -2.136557   |  |
| 3561 | [M]Adenocarcinoma, metastatic, NOS | ATP1A2    | 0.000042 | -2.129877   |  |
| 3562 | [M]Adenocarcinoma, metastatic, NOS | COL12A1   | 0.000068 | -2.127289   |  |
| 3563 | [M]Adenocarcinoma, metastatic, NOS | BTNL8     | 0.000156 | -2.112837   |  |
| 3564 | [M]Adenocarcinoma, metastatic, NOS | TSPAN1    | 0.000005 | -2.103625   |  |
| 3565 | [M]Adenocarcinoma, metastatic, NOS | CCL28     | 0        | -2.100519   |  |
| 3566 | [M]Adenocarcinoma, metastatic, NOS | BEST2     | 0.000001 | -2.082137   |  |
| 3567 | [M]Adenocarcinoma, metastatic, NOS | MXD1      | 0.000061 | -2.07945    |  |
| 3568 | [M]Adenocarcinoma, metastatic, NOS | LOC401093 | 0.000015 | -2.07855    |  |
| 3569 | [M]Adenocarcinoma, metastatic, NOS | IGK@      | 0.000105 | -2.073315   |  |
| 3570 | [M]Adenocarcinoma, metastatic, NOS | TACR2     | 0.000003 | -2.066205   |  |
| 3571 | [M]Adenocarcinoma, metastatic, NOS | FHL1      | 0.000016 | -2.065244   |  |
| 3572 | [M]Adenocarcinoma, metastatic, NOS | SPINK5    | 0.000008 | -2.063378   |  |
| 3573 | [M]Adenocarcinoma, metastatic, NOS | NOS2      | 0        | -2.030442   |  |
| 3574 | [M]Adenocarcinoma, metastatic, NOS | EDN3      | 0.000008 | -2.029476   |  |
| 3575 | [M]Adenocarcinoma, metastatic, NOS | RHBDL2    | 0.000018 | -2.008757   |  |
| 3576 | [M]Adenocarcinoma, metastatic, NOS | IL1R2     | 0.000005 | -2.004665   |  |
| 3577 | [M]Adenocarcinoma, metastatic, NOS | SPP1      | 0.000061 | 2.517021    |  |
| 3578 | Abdominal bloating                 | FABP1     | 0        | -2308.77868 |  |
| 3579 | Abdominal bloating                 | MUC12     | 0        | -209.373649 |  |
| 3580 | Abdominal bloating                 | CLCA1     | 0        | -166.329655 |  |
| 3581 | Abdominal bloating                 | SLC26A3   | 0        | -146.423622 |  |
| 3582 | Abdominal bloating                 | KIAA1324  | 0        | -91.654443  |  |
| 3583 | Abdominal bloating                 | KRT20     | 0        | -86.507882  |  |
| 3584 | Abdominal bloating                 | HMGCS2    | 0        | -83.639346  |  |
| 3585 | Abdominal bloating                 | MS4A12    | 0        | -82.448661  |  |
| 3586 | Abdominal bloating                 | LOC646627 | 0        | -72.555607  |  |
| 3587 | Abdominal bloating                 | CEACAM7   | 0        | -68.625248  |  |
| 3588 | Abdominal bloating                 | REG4      | 0        | -63.627426  |  |
| 3589 | Abdominal bloating                 | RPS4Y1    | 0        | -62.909971  |  |
| 3590 | Abdominal bloating                 | ZG16      | 0        | -59.824355  |  |
| 3591 | Abdominal bloating                 | UGT2B17   | 0        | -59.327625  |  |
| 3592 | Abdominal bloating                 | REG3A     | 0        | -58.73218   |  |
| 3593 | Abdominal bloating                 | SPINK4    | 0        | -57.286765  |  |
| 3594 | Abdominal bloating                 | CLRN3     | 0        | -53.143041  |  |
| 3595 | Abdominal bloating                 | NOX1      | 0        | -52.860669  |  |
| 3596 | Abdominal bloating                 | CDX2      | 0        | -50.815172  |  |
| 3597 | Abdominal bloating                 | ITLN1     | 0        | -48.922536  |  |
| 3598 | Abdominal bloating                 | GPX2      | 0        | -44.495062  |  |

|      |                    |             |          |            |  |
|------|--------------------|-------------|----------|------------|--|
| 3599 | Abdominal bloating | MUC2        | 0        | -44.020129 |  |
| 3600 | Abdominal bloating | MEP1A       | 0        | -43.346431 |  |
| 3601 | Abdominal bloating | CDH17       | 0        | -41.09036  |  |
| 3602 | Abdominal bloating | ASCL2       | 0        | -39.896756 |  |
| 3603 | Abdominal bloating | PLA2G2A     | 0        | -38.307471 |  |
| 3604 | Abdominal bloating | RETNLB      | 0        | -35.592131 |  |
| 3605 | Abdominal bloating | CDX1        | 0        | -34.634482 |  |
| 3606 | Abdominal bloating | MUC13       | 0        | -34.226901 |  |
| 3607 | Abdominal bloating | CYorf15B    | 0        | -31.324209 |  |
| 3608 | Abdominal bloating | DEFA6       | 0.000002 | -31.267773 |  |
| 3609 | Abdominal bloating | REG1A       | 0        | -31.051786 |  |
| 3610 | Abdominal bloating | CDHR5       | 0        | -30.500108 |  |
| 3611 | Abdominal bloating | PCK1        | 0        | -29.962275 |  |
| 3612 | Abdominal bloating | POF1B       | 0        | -29.119571 |  |
| 3613 | Abdominal bloating | LEFTY1      | 0        | -28.018078 |  |
| 3614 | Abdominal bloating | PRAC        | 0        | -26.629458 |  |
| 3615 | Abdominal bloating | GPA33       | 0        | -25.961832 |  |
| 3616 | Abdominal bloating | CELP        | 0        | -25.83888  |  |
| 3617 | Abdominal bloating | DPEP1       | 0        | -24.530945 |  |
| 3618 | Abdominal bloating | HOXA10      | 0        | -23.590861 |  |
| 3619 | Abdominal bloating | EPS8L3      | 0        | -23.070948 |  |
| 3620 | Abdominal bloating | HOXB13      | 0        | -22.04816  |  |
| 3621 | Abdominal bloating | C10orf99    | 0        | -21.576673 |  |
| 3622 | Abdominal bloating | FUT6        | 0        | -21.479253 |  |
| 3623 | Abdominal bloating | MYH11       | 0        | -20.433715 |  |
| 3624 | Abdominal bloating | LCN15       | 0.000001 | -20.371923 |  |
| 3625 | Abdominal bloating | DEFA5       | 0        | -20.030758 |  |
| 3626 | Abdominal bloating | SI          | 0        | -19.435363 |  |
| 3627 | Abdominal bloating | GUCY2C      | 0        | -19.410843 |  |
| 3628 | Abdominal bloating | PRAP1       | 0        | -18.986976 |  |
| 3629 | Abdominal bloating | ISX         | 0        | -18.757539 |  |
| 3630 | Abdominal bloating | TRIM31      | 0        | -18.493633 |  |
| 3631 | Abdominal bloating | AZGP1       | 0        | -18.268344 |  |
| 3632 | Abdominal bloating | ATP10B      | 0        | -18.175808 |  |
| 3633 | Abdominal bloating | NCRNA00261  | 0        | -18.025907 |  |
| 3634 | Abdominal bloating | CEACAM1     | 0        | -17.985376 |  |
| 3635 | Abdominal bloating | DDX3Y       | 0        | -17.800707 |  |
| 3636 | Abdominal bloating | C9orf152    | 0        | -17.626246 |  |
| 3637 | Abdominal bloating | ADH1C       | 0        | -17.540833 |  |
| 3638 | Abdominal bloating | TNMD        | 0        | -17.275699 |  |
| 3639 | Abdominal bloating | CCL14-CCL15 | 0        | -16.911808 |  |
| 3640 | Abdominal bloating | C17orf76    | 0        | -16.851722 |  |
| 3641 | Abdominal bloating | DMBT1       | 0        | -16.468198 |  |
| 3642 | Abdominal bloating | EIF1AY      | 0        | -15.942025 |  |
| 3643 | Abdominal bloating | UGT8        | 0        | -15.892361 |  |
| 3644 | Abdominal bloating | GRM8        | 0        | -15.886257 |  |
| 3645 | Abdominal bloating | CYP2B6      | 0        | -15.761221 |  |
| 3646 | Abdominal bloating | PLCB4       | 0        | -15.332196 |  |
| 3647 | Abdominal bloating | LGR5        | 0        | -15.182773 |  |
| 3648 | Abdominal bloating | HNF4A       | 0        | -14.899509 |  |

|      |                    |              |          |            |  |
|------|--------------------|--------------|----------|------------|--|
| 3649 | Abdominal bloating | SLC39A5      | 0        | -14.674513 |  |
| 3650 | Abdominal bloating | FOXA2        | 0        | -14.585559 |  |
| 3651 | Abdominal bloating | FAM55D       | 0        | -14.452564 |  |
| 3652 | Abdominal bloating | NAT2         | 0        | -14.367226 |  |
| 3653 | Abdominal bloating | DDC          | 0.000004 | -14.048608 |  |
| 3654 | Abdominal bloating | KDM5D        | 0        | -14.018731 |  |
| 3655 | Abdominal bloating | PPP1R1B      | 0        | -13.860104 |  |
| 3656 | Abdominal bloating | REG1B        | 0.000004 | -13.700289 |  |
| 3657 | Abdominal bloating | CDHR1        | 0.000002 | -13.435    |  |
| 3658 | Abdominal bloating | HSD11B2      | 0        | -13.191935 |  |
| 3659 | Abdominal bloating | CYorf15A     | 0        | -13.120595 |  |
| 3660 | Abdominal bloating | VIL1         | 0        | -12.874192 |  |
| 3661 | Abdominal bloating | IHH          | 0        | -12.64539  |  |
| 3662 | Abdominal bloating | PRSS3        | 0        | -12.612004 |  |
| 3663 | Abdominal bloating | CA4          | 0        | -12.226428 |  |
| 3664 | Abdominal bloating | CFTR         | 0        | -12.120136 |  |
| 3665 | Abdominal bloating | LRRC19       | 0        | -12.10652  |  |
| 3666 | Abdominal bloating | HEPACAM2     | 0        | -11.977799 |  |
| 3667 | Abdominal bloating | CA1          | 0        | -11.911745 |  |
| 3668 | Abdominal bloating | PYY          | 0        | -11.650642 |  |
| 3669 | Abdominal bloating | MUC17        | 0        | -11.632019 |  |
| 3670 | Abdominal bloating | SLC27A2      | 0        | -11.578725 |  |
| 3671 | Abdominal bloating | BMP4         | 0        | -11.187964 |  |
| 3672 | Abdominal bloating | C1orf125     | 0        | -11.185226 |  |
| 3673 | Abdominal bloating | VAV3         | 0        | -11.114608 |  |
| 3674 | Abdominal bloating | TDGF1        | 0        | -10.987569 |  |
| 3675 | Abdominal bloating | AQP8         | 0        | -10.740918 |  |
| 3676 | Abdominal bloating | UGT1A1       | 0.000009 | -10.703886 |  |
| 3677 | Abdominal bloating | RNF43        | 0        | -10.673008 |  |
| 3678 | Abdominal bloating | NR1I2        | 0        | -10.406598 |  |
| 3679 | Abdominal bloating | ACE2         | 0        | -10.391024 |  |
| 3680 | Abdominal bloating | CST1         | 0        | -10.002693 |  |
| 3681 | Abdominal bloating | ATOH1        | 0        | -9.724825  |  |
| 3682 | Abdominal bloating | XK           | 0        | -9.618045  |  |
| 3683 | Abdominal bloating | FGFR4        | 0        | -9.613006  |  |
| 3684 | Abdominal bloating | FCGBP        | 0        | -9.477318  |  |
| 3685 | Abdominal bloating | SATB2        | 0        | -9.470035  |  |
| 3686 | Abdominal bloating | ANXA13       | 0        | -9.348086  |  |
| 3687 | Abdominal bloating | HES6         | 0        | -9.321556  |  |
| 3688 | Abdominal bloating | LOC100288092 | 0        | -9.320831  |  |
| 3689 | Abdominal bloating | ACSL6        | 0        | -9.315487  |  |
| 3690 | Abdominal bloating | XPNPEP2      | 0        | -9.301162  |  |
| 3691 | Abdominal bloating | HOXA13       | 0        | -9.274783  |  |
| 3692 | Abdominal bloating | CEL          | 0        | -9.263451  |  |
| 3693 | Abdominal bloating | LY6G6D       | 0        | -9.216926  |  |
| 3694 | Abdominal bloating | HORMAD1      | 0        | -9.182895  |  |
| 3695 | Abdominal bloating | GUCA2A       | 0        | -8.899813  |  |
| 3696 | Abdominal bloating | UGT1A8       | 0        | -8.768448  |  |
| 3697 | Abdominal bloating | PNLIPRP2     | 0.000007 | -8.746048  |  |
| 3698 | Abdominal bloating | ATP2A3       | 0        | -8.635258  |  |

|      |                    |              |          |           |  |
|------|--------------------|--------------|----------|-----------|--|
| 3699 | Abdominal bloating | RNF186       | 0        | -8.458191 |  |
| 3700 | Abdominal bloating | NKX2-3       | 0        | -8.456895 |  |
| 3701 | Abdominal bloating | IGJ          | 0.00001  | -8.451432 |  |
| 3702 | Abdominal bloating | AKAP9        | 0        | -8.393213 |  |
| 3703 | Abdominal bloating | PIP5K1B      | 0.000002 | -8.330803 |  |
| 3704 | Abdominal bloating | KCNIP2       | 0        | -8.266577 |  |
| 3705 | Abdominal bloating | TMED6        | 0        | -8.254297 |  |
| 3706 | Abdominal bloating | PITX1        | 0        | -8.246631 |  |
| 3707 | Abdominal bloating | TMPRSS2      | 0.000005 | -8.057812 |  |
| 3708 | Abdominal bloating | GIPC2        | 0.000014 | -7.999395 |  |
| 3709 | Abdominal bloating | C2orf89      | 0        | -7.927386 |  |
| 3710 | Abdominal bloating | TSPAN1       | 0.000008 | -7.88324  |  |
| 3711 | Abdominal bloating | C13orf18     | 0        | -7.86143  |  |
| 3712 | Abdominal bloating | FLJ32063     | 0        | -7.836731 |  |
| 3713 | Abdominal bloating | SLC12A2      | 0        | -7.773392 |  |
| 3714 | Abdominal bloating | GMDS         | 0        | -7.715403 |  |
| 3715 | Abdominal bloating | MOGAT3       | 0        | -7.714644 |  |
| 3716 | Abdominal bloating | ABCB11       | 0        | -7.702104 |  |
| 3717 | Abdominal bloating | CNTNAP2      | 0        | -7.623161 |  |
| 3718 | Abdominal bloating | DLX1         | 0        | -7.544396 |  |
| 3719 | Abdominal bloating | CETP         | 0.000005 | -7.541725 |  |
| 3720 | Abdominal bloating | PIGR         | 0        | -7.518368 |  |
| 3721 | Abdominal bloating | IL17RB       | 0        | -7.505405 |  |
| 3722 | Abdominal bloating | PROX1        | 0        | -7.50077  |  |
| 3723 | Abdominal bloating | ABCC2        | 0        | -7.455205 |  |
| 3724 | Abdominal bloating | SLC5A1       | 0.000007 | -7.441822 |  |
| 3725 | Abdominal bloating | LOC100507192 | 0.000008 | -7.403896 |  |
| 3726 | Abdominal bloating | ITGA6        | 0        | -7.252551 |  |
| 3727 | Abdominal bloating | NCRNA00253   | 0        | -7.179077 |  |
| 3728 | Abdominal bloating | KLF4         | 0        | -7.172949 |  |
| 3729 | Abdominal bloating | NCRNA00185   | 0        | -7.166042 |  |
| 3730 | Abdominal bloating | SLC18A1      | 0        | -7.164393 |  |
| 3731 | Abdominal bloating | CYP2J2       | 0        | -7.112121 |  |
| 3732 | Abdominal bloating | MYO7B        | 0        | -7.099161 |  |
| 3733 | Abdominal bloating | F11          | 0.000001 | -7.022134 |  |
| 3734 | Abdominal bloating | LOC400573    | 0        | -6.986016 |  |
| 3735 | Abdominal bloating | MYO1A        | 0        | -6.968781 |  |
| 3736 | Abdominal bloating | LOC157860    | 0        | -6.967505 |  |
| 3737 | Abdominal bloating | SOX8         | 0        | -6.793978 |  |
| 3738 | Abdominal bloating | FAM55A       | 0        | -6.765863 |  |
| 3739 | Abdominal bloating | EPB41L4B     | 0.000001 | -6.736532 |  |
| 3740 | Abdominal bloating | PCCA         | 0        | -6.671335 |  |
| 3741 | Abdominal bloating | CKMT1A       | 0.000003 | -6.650253 |  |
| 3742 | Abdominal bloating | GPR160       | 0        | -6.556168 |  |
| 3743 | Abdominal bloating | HOXD13       | 0        | -6.528536 |  |
| 3744 | Abdominal bloating | GPR120       | 0.000006 | -6.51586  |  |
| 3745 | Abdominal bloating | ARSE         | 0        | -6.509081 |  |
| 3746 | Abdominal bloating | GAL          | 0        | -6.468017 |  |
| 3747 | Abdominal bloating | SYNPO2       | 0        | -6.442706 |  |
| 3748 | Abdominal bloating | CAPN6        | 0.000001 | -6.433942 |  |

|      |                    |           |          |           |  |
|------|--------------------|-----------|----------|-----------|--|
| 3749 | Abdominal bloating | CYP4F2    | 0.000012 | -6.410884 |  |
| 3750 | Abdominal bloating | LITD1     | 0        | -6.396891 |  |
| 3751 | Abdominal bloating | SLC3A1    | 0        | -6.260852 |  |
| 3752 | Abdominal bloating | PARM1     | 0.000007 | -6.236635 |  |
| 3753 | Abdominal bloating | NOS2      | 0        | -6.1485   |  |
| 3754 | Abdominal bloating | LOC145837 | 0.000001 | -6.129473 |  |
| 3755 | Abdominal bloating | DUSP27    | 0.000006 | -6.126684 |  |
| 3756 | Abdominal bloating | BCAN      | 0        | -6.00412  |  |
| 3757 | Abdominal bloating | FAIM2     | 0.000015 | -5.959748 |  |
| 3758 | Abdominal bloating | CHP2      | 0        | -5.936097 |  |
| 3759 | Abdominal bloating | GUCA2B    | 0        | -5.932057 |  |
| 3760 | Abdominal bloating | ARHGAP27  | 0.000007 | -5.885347 |  |
| 3761 | Abdominal bloating | PRLR      | 0        | -5.866977 |  |
| 3762 | Abdominal bloating | USP9Y     | 0.000002 | -5.855325 |  |
| 3763 | Abdominal bloating | BTNL8     | 0.000015 | -5.847233 |  |
| 3764 | Abdominal bloating | ABCB1     | 0        | -5.822776 |  |
| 3765 | Abdominal bloating | KIAA1199  | 0        | -5.763513 |  |
| 3766 | Abdominal bloating | A1CF      | 0.000002 | -5.701754 |  |
| 3767 | Abdominal bloating | SLC1A7    | 0        | -5.693207 |  |
| 3768 | Abdominal bloating | TMEM54    | 0        | -5.642958 |  |
| 3769 | Abdominal bloating | FAM84A    | 0        | -5.633227 |  |
| 3770 | Abdominal bloating | CA12      | 0        | -5.567145 |  |
| 3771 | Abdominal bloating | PTGER4    | 0.000001 | -5.542314 |  |
| 3772 | Abdominal bloating | FAM134B   | 0        | -5.512663 |  |
| 3773 | Abdominal bloating | FAR2      | 0        | -5.46811  |  |
| 3774 | Abdominal bloating | GPR128    | 0        | -5.434922 |  |
| 3775 | Abdominal bloating | MYLK      | 0        | -5.414259 |  |
| 3776 | Abdominal bloating | SYT7      | 0        | -5.411638 |  |
| 3777 | Abdominal bloating | RNASE4    | 0.000002 | -5.404236 |  |
| 3778 | Abdominal bloating | RBP4      | 0        | -5.395766 |  |
| 3779 | Abdominal bloating | FREM1     | 0        | -5.380023 |  |
| 3780 | Abdominal bloating | TPSG1     | 0        | -5.30033  |  |
| 3781 | Abdominal bloating | KBTBD11   | 0.000009 | -5.292846 |  |
| 3782 | Abdominal bloating | GPRC5D    | 0.000005 | -5.247907 |  |
| 3783 | Abdominal bloating | GIPR      | 0        | -5.202    |  |
| 3784 | Abdominal bloating | STARD10   | 0.000001 | -5.180497 |  |
| 3785 | Abdominal bloating | CHGA      | 0        | -5.147575 |  |
| 3786 | Abdominal bloating | KALRN     | 0.000009 | -5.107389 |  |
| 3787 | Abdominal bloating | BEST2     | 0        | -5.095133 |  |
| 3788 | Abdominal bloating | CHD7      | 0        | -5.075944 |  |
| 3789 | Abdominal bloating | SLC13A2   | 0.000014 | -5.068962 |  |
| 3790 | Abdominal bloating | DDAH1     | 0.000009 | -5.061878 |  |
| 3791 | Abdominal bloating | TESC      | 0.00001  | -5.014794 |  |
| 3792 | Abdominal bloating | ANG       | 0        | -5.012935 |  |
| 3793 | Abdominal bloating | EDN3      | 0        | -4.996522 |  |
| 3794 | Abdominal bloating | SEL1L2    | 0        | -4.985393 |  |
| 3795 | Abdominal bloating | KIAA1984  | 0        | -4.963625 |  |
| 3796 | Abdominal bloating | ADCYAP1   | 0        | -4.925003 |  |
| 3797 | Abdominal bloating | DNASE1L3  | 0.000005 | -4.904384 |  |
| 3798 | Abdominal bloating | MRAP2     | 0.000014 | -4.871309 |  |

|      |                    |              |          |           |  |
|------|--------------------|--------------|----------|-----------|--|
| 3799 | Abdominal bloating | APOB48R      | 0.000006 | -4.869789 |  |
| 3800 | Abdominal bloating | HOXD10       | 0        | -4.836483 |  |
| 3801 | Abdominal bloating | CLDN15       | 0        | -4.82792  |  |
| 3802 | Abdominal bloating | ASPA         | 0.000018 | -4.823707 |  |
| 3803 | Abdominal bloating | LOC26102     | 0.000017 | -4.740998 |  |
| 3804 | Abdominal bloating | GRIA4        | 0.000006 | -4.718374 |  |
| 3805 | Abdominal bloating | IGLV6-57     | 0        | -4.703152 |  |
| 3806 | Abdominal bloating | FABP6        | 0.000006 | -4.681751 |  |
| 3807 | Abdominal bloating | DSEL         | 0        | -4.644315 |  |
| 3808 | Abdominal bloating | CKB          | 0        | -4.64174  |  |
| 3809 | Abdominal bloating | TF           | 0        | -4.635545 |  |
| 3810 | Abdominal bloating | PTPRN2       | 0        | -4.573172 |  |
| 3811 | Abdominal bloating | CAB39L       | 0.000007 | -4.564665 |  |
| 3812 | Abdominal bloating | RTP3         | 0.000017 | -4.539891 |  |
| 3813 | Abdominal bloating | AMACR        | 0        | -4.51568  |  |
| 3814 | Abdominal bloating | WNK2         | 0.000001 | -4.491796 |  |
| 3815 | Abdominal bloating | PER2         | 0        | -4.468161 |  |
| 3816 | Abdominal bloating | LOC100240728 | 0        | -4.468025 |  |
| 3817 | Abdominal bloating | PKHD1L1      | 0        | -4.466044 |  |
| 3818 | Abdominal bloating | CHN2         | 0        | -4.448822 |  |
| 3819 | Abdominal bloating | CES2         | 0        | -4.440582 |  |
| 3820 | Abdominal bloating | SLC26A2      | 0.000019 | -4.437685 |  |
| 3821 | Abdominal bloating | PTPRO        | 0        | -4.432594 |  |
| 3822 | Abdominal bloating | DKFZP434L18  | 0        | -4.427344 |  |
| 3823 | Abdominal bloating | HSD17B3      | 0        | -4.399416 |  |
| 3824 | Abdominal bloating | GABRA2       | 0        | -4.390212 |  |
| 3825 | Abdominal bloating | SRRM3        | 0        | -4.388701 |  |
| 3826 | Abdominal bloating | NEK3         | 0.000017 | -4.388514 |  |
| 3827 | Abdominal bloating | C3orf65      | 0        | -4.364095 |  |
| 3828 | Abdominal bloating | FGGY         | 0        | -4.355683 |  |
| 3829 | Abdominal bloating | EML6         | 0        | -4.322767 |  |
| 3830 | Abdominal bloating | RPL3L        | 0.00002  | -4.302074 |  |
| 3831 | Abdominal bloating | NOTUM        | 0.000012 | -4.301176 |  |
| 3832 | Abdominal bloating | RFFL         | 0.000003 | -4.285123 |  |
| 3833 | Abdominal bloating | TMEM151B     | 0.000016 | -4.251667 |  |
| 3834 | Abdominal bloating | C2orf61      | 0        | -4.232169 |  |
| 3835 | Abdominal bloating | GALR2        | 0.000001 | -4.209086 |  |
| 3836 | Abdominal bloating | CPS1-IT      | 0.000001 | -4.189593 |  |
| 3837 | Abdominal bloating | CD6          | 0        | -4.177068 |  |
| 3838 | Abdominal bloating | FOXC2        | 0.000001 | -4.152818 |  |
| 3839 | Abdominal bloating | LOC100288781 | 0        | -4.124622 |  |
| 3840 | Abdominal bloating | HOXB9        | 0        | -4.110946 |  |
| 3841 | Abdominal bloating | FAM26D       | 0        | -4.101276 |  |
| 3842 | Abdominal bloating | JPH1         | 0        | -4.086549 |  |
| 3843 | Abdominal bloating | MYOCD        | 0        | -4.05474  |  |
| 3844 | Abdominal bloating | LOC100505633 | 0.000002 | -4.040562 |  |
| 3845 | Abdominal bloating | RHAG         | 0        | -4.034003 |  |
| 3846 | Abdominal bloating | AIF1         | 0        | -4.017584 |  |
| 3847 | Abdominal bloating | ZBTB7A       | 0        | -3.983099 |  |
| 3848 | Abdominal bloating | TUSC5        | 0        | -3.964784 |  |



|      |                    |              |          |           |  |
|------|--------------------|--------------|----------|-----------|--|
| 3849 | Abdominal bloating | LOC572558    | 0        | -3.936    |  |
| 3850 | Abdominal bloating | ME1          | 0.000016 | -3.897653 |  |
| 3851 | Abdominal bloating | LOC100509223 | 0        | -3.896447 |  |
| 3852 | Abdominal bloating | ARHGAP20     | 0.000019 | -3.85838  |  |
| 3853 | Abdominal bloating | FMO5         | 0        | -3.843681 |  |
| 3854 | Abdominal bloating | FLJ22763     | 0.000006 | -3.782035 |  |
| 3855 | Abdominal bloating | NFATC1       | 0        | -3.763127 |  |
| 3856 | Abdominal bloating | HNMT         | 0        | -3.762275 |  |
| 3857 | Abdominal bloating | LOC25845     | 0        | -3.746591 |  |
| 3858 | Abdominal bloating | ENPP3        | 0        | -3.737595 |  |
| 3859 | Abdominal bloating | FGD2         | 0        | -3.73574  |  |
| 3860 | Abdominal bloating | SIRT5        | 0.000003 | -3.70643  |  |
| 3861 | Abdominal bloating | TMCC2        | 0        | -3.696502 |  |
| 3862 | Abdominal bloating | GRTP1        | 0.000005 | -3.692202 |  |
| 3863 | Abdominal bloating | HR           | 0.000002 | -3.66396  |  |
| 3864 | Abdominal bloating | MS4A5        | 0.000012 | -3.646129 |  |
| 3865 | Abdominal bloating | CA10         | 0.000019 | -3.602751 |  |
| 3866 | Abdominal bloating | PIGZ         | 0        | -3.60197  |  |
| 3867 | Abdominal bloating | WDR59        | 0        | -3.597508 |  |
| 3868 | Abdominal bloating | CSHL1        | 0.000012 | -3.592693 |  |
| 3869 | Abdominal bloating | TCF21        | 0        | -3.561143 |  |
| 3870 | Abdominal bloating | PAH          | 0        | -3.559849 |  |
| 3871 | Abdominal bloating | AFF2         | 0.000002 | -3.53782  |  |
| 3872 | Abdominal bloating | LOC283177    | 0        | -3.460578 |  |
| 3873 | Abdominal bloating | CDH8         | 0.000001 | -3.457635 |  |
| 3874 | Abdominal bloating | LOC100506591 | 0.000001 | -3.4189   |  |
| 3875 | Abdominal bloating | LRRC66       | 0        | -3.41537  |  |
| 3876 | Abdominal bloating | LAMA4        | 0        | -3.362465 |  |
| 3877 | Abdominal bloating | C14orf176    | 0.000001 | -3.352164 |  |
| 3878 | Abdominal bloating | ALG2         | 0        | -3.33906  |  |
| 3879 | Abdominal bloating | BCL11A       | 0        | -3.319183 |  |
| 3880 | Abdominal bloating | C8orf46      | 0.00001  | -3.306362 |  |
| 3881 | Abdominal bloating | AKAP1        | 0.000001 | -3.244937 |  |
| 3882 | Abdominal bloating | RBM26        | 0.000002 | -3.226504 |  |
| 3883 | Abdominal bloating | KLK1         | 0.000006 | -3.223835 |  |
| 3884 | Abdominal bloating | DIAPH2       | 0.000015 | -3.207873 |  |
| 3885 | Abdominal bloating | MTUS1        | 0        | -3.201365 |  |
| 3886 | Abdominal bloating | RNF6         | 0        | -3.179625 |  |
| 3887 | Abdominal bloating | SEMA4G       | 0.000012 | -3.168755 |  |
| 3888 | Abdominal bloating | MINK1        | 0        | -3.16079  |  |
| 3889 | Abdominal bloating | PRPH         | 0.00002  | -3.113268 |  |
| 3890 | Abdominal bloating | C19orf6      | 0.000012 | -3.091872 |  |
| 3891 | Abdominal bloating | PHACTR1      | 0        | -3.086872 |  |
| 3892 | Abdominal bloating | C6orf15      | 0.000009 | -3.084821 |  |
| 3893 | Abdominal bloating | IDI2         | 0        | -3.079875 |  |
| 3894 | Abdominal bloating | IL1B         | 0        | -3.077073 |  |
| 3895 | Abdominal bloating | PBLD         | 0.000002 | -3.040638 |  |
| 3896 | Abdominal bloating | GPR172B      | 0.000009 | -3.007794 |  |
| 3897 | Abdominal bloating | TRIB3        | 0.000011 | -2.978401 |  |
| 3898 | Abdominal bloating | MAG          | 0.000001 | -2.9736   |  |

|      |                    |          |          |            |  |
|------|--------------------|----------|----------|------------|--|
| 3899 | Abdominal bloating | IRX4     | 0.000018 | -2.9407    |  |
| 3900 | Abdominal bloating | KCNE3    | 0.000009 | -2.895039  |  |
| 3901 | Abdominal bloating | C8orf74  | 0.000001 | -2.893661  |  |
| 3902 | Abdominal bloating | PRDM8    | 0.000016 | -2.837176  |  |
| 3903 | Abdominal bloating | NDFIP2   | 0        | -2.805343  |  |
| 3904 | Abdominal bloating | CACNB4   | 0        | -2.736415  |  |
| 3905 | Abdominal bloating | GLRX     | 0.000003 | -2.73054   |  |
| 3906 | Abdominal bloating | TMEM56   | 0.000007 | -2.693111  |  |
| 3907 | Abdominal bloating | ASB9     | 0.00002  | -2.603547  |  |
| 3908 | Abdominal bloating | AKR7A3   | 0        | -2.579497  |  |
| 3909 | Abdominal bloating | NEDD9    | 0.000003 | -2.536093  |  |
| 3910 | Abdominal bloating | PPP2R2C  | 0        | -2.529724  |  |
| 3911 | Abdominal bloating | CDC42SE2 | 0        | -2.503239  |  |
| 3912 | Abdominal bloating | CDC42    | 0.000001 | -2.497118  |  |
| 3913 | Abdominal bloating | TCF3     | 0.000001 | -2.48319   |  |
| 3914 | Abdominal bloating | PREP     | 0        | -2.47868   |  |
| 3915 | Abdominal bloating | C13orf23 | 0        | -2.469742  |  |
| 3916 | Abdominal bloating | UGT1A6   | 0.000003 | -2.380072  |  |
| 3917 | Abdominal bloating | FRYL     | 0        | -2.354414  |  |
| 3918 | Abdominal bloating | ALDH1B1  | 0.000014 | -2.332173  |  |
| 3919 | Abdominal bloating | ART3     | 0        | -2.314089  |  |
| 3920 | Abdominal bloating | REPS2    | 0        | -2.309815  |  |
| 3921 | Abdominal bloating | L3MBTL1  | 0        | -2.265791  |  |
| 3922 | Abdominal bloating | ZNF511   | 0        | -2.15189   |  |
| 3923 | Abdominal bloating | EREG     | 0.000008 | -2.058147  |  |
| 3924 | Abdominal bloating | PPIEL    | 0        | -2.004902  |  |
| 3925 | Abscess            | UGT2A3   | 0.040416 | 1.545498   |  |
| 3926 | Adenocarcinoma     | OSTalpha | 0.000026 | -47.033402 |  |
| 3927 | Adenocarcinoma     | COL6A1   | 0.000411 | -28.023475 |  |
| 3928 | Adenocarcinoma     | GCG      | 0        | -16.899049 |  |
| 3929 | Adenocarcinoma     | SLC30A10 | 0.000006 | -16.146988 |  |
| 3930 | Adenocarcinoma     | AQP8     | 0.000001 | -15.832717 |  |
| 3931 | Adenocarcinoma     | DNAJC12  | 0.002663 | -14.269987 |  |
| 3932 | Adenocarcinoma     | C12orf29 | 0.00027  | -13.128954 |  |
| 3933 | Adenocarcinoma     | STK33    | 0.01202  | -11.276326 |  |
| 3934 | Adenocarcinoma     | C1orf61  | 0.018839 | -9.579861  |  |
| 3935 | Adenocarcinoma     | VSTM2A   | 0        | -9.14717   |  |
| 3936 | Adenocarcinoma     | CXorf57  | 0.006263 | -8.627943  |  |
| 3937 | Adenocarcinoma     | PLP1     | 0        | -8.565039  |  |
| 3938 | Adenocarcinoma     | EMR2     | 0.000098 | -8.515725  |  |
| 3939 | Adenocarcinoma     | NR1H4    | 0.000846 | -8.412746  |  |
| 3940 | Adenocarcinoma     | GNAI1    | 0.00045  | -8.167461  |  |
| 3941 | Adenocarcinoma     | NPY6R    | 0        | -8.003144  |  |
| 3942 | Adenocarcinoma     | ROBO1    | 0.010314 | -7.391541  |  |
| 3943 | Adenocarcinoma     | PRDM16   | 0.030623 | -7.14597   |  |
| 3944 | Adenocarcinoma     | CCL23    | 0.000022 | -7.094239  |  |
| 3945 | Adenocarcinoma     | MFAP2    | 0.004677 | -6.950453  |  |
| 3946 | Adenocarcinoma     | NRXN1    | 0        | -6.901082  |  |
| 3947 | Adenocarcinoma     | KANK4    | 0.000582 | -6.736475  |  |
| 3948 | Adenocarcinoma     | ANGPTL1  | 0.000002 | -6.700761  |  |

|      |                |           |          |           |  |
|------|----------------|-----------|----------|-----------|--|
| 3949 | Adenocarcinoma | SLC25A34  | 0.000022 | -6.674234 |  |
| 3950 | Adenocarcinoma | PCDHGA1   | 0.00004  | -6.51504  |  |
| 3951 | Adenocarcinoma | GNG13     | 0        | -6.173533 |  |
| 3952 | Adenocarcinoma | DHRS9     | 0.000007 | -6.14952  |  |
| 3953 | Adenocarcinoma | PTGDR     | 0        | -6.016754 |  |
| 3954 | Adenocarcinoma | KIAA2022  | 0.000001 | -5.99665  |  |
| 3955 | Adenocarcinoma | RCOR2     | 0.000034 | -5.979644 |  |
| 3956 | Adenocarcinoma | ADH1C     | 0.00002  | -5.903407 |  |
| 3957 | Adenocarcinoma | GUCA2B    | 0.000279 | -5.893998 |  |
| 3958 | Adenocarcinoma | PIK3CD    | 0.011996 | -5.838027 |  |
| 3959 | Adenocarcinoma | MAMDC2    | 0        | -5.826741 |  |
| 3960 | Adenocarcinoma | DNM3      | 0.003505 | -5.795441 |  |
| 3961 | Adenocarcinoma | C2orf58   | 0        | -5.665292 |  |
| 3962 | Adenocarcinoma | LGI4      | 0        | -5.496047 |  |
| 3963 | Adenocarcinoma | IL1R2     | 0.000052 | -5.493194 |  |
| 3964 | Adenocarcinoma | CDH19     | 0        | -5.453266 |  |
| 3965 | Adenocarcinoma | RNF220    | 0.000002 | -5.421607 |  |
| 3966 | Adenocarcinoma | NTRK2     | 0.002325 | -5.420538 |  |
| 3967 | Adenocarcinoma | RGS13     | 0        | -5.365318 |  |
| 3968 | Adenocarcinoma | SERPINI1  | 0.000034 | -5.307325 |  |
| 3969 | Adenocarcinoma | SVOPL     | 0        | -5.28447  |  |
| 3970 | Adenocarcinoma | PCSK2     | 0.000018 | -5.268769 |  |
| 3971 | Adenocarcinoma | SPARCL1   | 0        | -5.244626 |  |
| 3972 | Adenocarcinoma | FADS2     | 0.009782 | -5.227213 |  |
| 3973 | Adenocarcinoma | SCN7A     | 0        | -5.18474  |  |
| 3974 | Adenocarcinoma | AHNAK2    | 0.006163 | -5.163912 |  |
| 3975 | Adenocarcinoma | C20orf194 | 0.011216 | -5.127653 |  |
| 3976 | Adenocarcinoma | ZNF525    | 0.001611 | -5.032233 |  |
| 3977 | Adenocarcinoma | BMP3      | 0.00004  | -4.988584 |  |
| 3978 | Adenocarcinoma | SPIB      | 0.000008 | -4.962092 |  |
| 3979 | Adenocarcinoma | SORCS1    | 0        | -4.888339 |  |
| 3980 | Adenocarcinoma | FGL2      | 0        | -4.775091 |  |
| 3981 | Adenocarcinoma | KCNV1     | 0        | -4.774511 |  |
| 3982 | Adenocarcinoma | PDZD3     | 0.000026 | -4.758979 |  |
| 3983 | Adenocarcinoma | FBXO27    | 0.019162 | -4.73933  |  |
| 3984 | Adenocarcinoma | CKB       | 0.009854 | -4.716011 |  |
| 3985 | Adenocarcinoma | VPS53     | 0.031742 | -4.702636 |  |
| 3986 | Adenocarcinoma | DPP10     | 0.000008 | -4.664912 |  |
| 3987 | Adenocarcinoma | TEX11     | 0.000007 | -4.646122 |  |
| 3988 | Adenocarcinoma | LOC389023 | 0.000323 | -4.643267 |  |
| 3989 | Adenocarcinoma | ADH1B     | 0.000129 | -4.601914 |  |
| 3990 | Adenocarcinoma | HIPK2     | 0.019907 | -4.586053 |  |
| 3991 | Adenocarcinoma | SNAI1     | 0.036191 | -4.580315 |  |
| 3992 | Adenocarcinoma | PCDHGA3   | 0.02964  | -4.558381 |  |
| 3993 | Adenocarcinoma | C7        | 0.000004 | -4.513299 |  |
| 3994 | Adenocarcinoma | WSCD1     | 0.000004 | -4.401202 |  |
| 3995 | Adenocarcinoma | BMX       | 0        | -4.36962  |  |
| 3996 | Adenocarcinoma | KRTDAP    | 0.039655 | -4.287323 |  |
| 3997 | Adenocarcinoma | TMEM195   | 0.009197 | -4.27626  |  |
| 3998 | Adenocarcinoma | LRRN2     | 0.000038 | -4.27253  |  |

|      |                |           |          |           |  |
|------|----------------|-----------|----------|-----------|--|
| 3999 | Adenocarcinoma | OSTBETA   | 0.000019 | -4.25459  |  |
| 4000 | Adenocarcinoma | LOC441644 | 0.000673 | -4.164103 |  |
| 4001 | Adenocarcinoma | ATP1A2    | 0.000005 | -4.144251 |  |
| 4002 | Adenocarcinoma | ZNF75A    | 0.000756 | -4.135019 |  |
| 4003 | Adenocarcinoma | UGT1A8    | 0.000039 | -4.117387 |  |
| 4004 | Adenocarcinoma | MID1      | 0.031742 | -4.106245 |  |
| 4005 | Adenocarcinoma | PLAC8     | 0.000164 | -4.104069 |  |
| 4006 | Adenocarcinoma | LOC645195 | 0.018949 | -4.100791 |  |
| 4007 | Adenocarcinoma | OTOR      | 0.042846 | -4.052284 |  |
| 4008 | Adenocarcinoma | RNF148    | 0.0398   | -4.051476 |  |
| 4009 | Adenocarcinoma | SLC7A11   | 0.000153 | -4.030736 |  |
| 4010 | Adenocarcinoma | CDH23     | 0.042984 | -4.01686  |  |
| 4011 | Adenocarcinoma | FAM101B   | 0.011797 | -4.016207 |  |
| 4012 | Adenocarcinoma | PTPRS     | 0.017946 | -4.014396 |  |
| 4013 | Adenocarcinoma | CA2       | 0.000238 | -3.967964 |  |
| 4014 | Adenocarcinoma | MOGAT2    | 0.000064 | -3.948991 |  |
| 4015 | Adenocarcinoma | HHEX      | 0.001742 | -3.935474 |  |
| 4016 | Adenocarcinoma | UGT2B17   | 0.000072 | -3.933187 |  |
| 4017 | Adenocarcinoma | SLC26A2   | 0.000445 | -3.928833 |  |
| 4018 | Adenocarcinoma | ARHGEF4   | 0.03862  | -3.905656 |  |
| 4019 | Adenocarcinoma | ZNF134    | 0.001018 | -3.903334 |  |
| 4020 | Adenocarcinoma | MAPK8IP1  | 0.005277 | -3.885466 |  |
| 4021 | Adenocarcinoma | SCIN      | 0.000238 | -3.855473 |  |
| 4022 | Adenocarcinoma | XKR4      | 0.000003 | -3.845193 |  |
| 4023 | Adenocarcinoma | FAM55D    | 0.000219 | -3.823774 |  |
| 4024 | Adenocarcinoma | SOX10     | 0        | -3.805372 |  |
| 4025 | Adenocarcinoma | BMP5      | 0.000002 | -3.798608 |  |
| 4026 | Adenocarcinoma | MGC48628  | 0.014958 | -3.78765  |  |
| 4027 | Adenocarcinoma | XLKD1     | 0        | -3.776766 |  |
| 4028 | Adenocarcinoma | PCLO      | 0.003695 | -3.771198 |  |
| 4029 | Adenocarcinoma | FXYD3     | 0.000061 | -3.760548 |  |
| 4030 | Adenocarcinoma | CSF1R     | 0.0008   | -3.757652 |  |
| 4031 | Adenocarcinoma | APLF      | 0.007661 | -3.743234 |  |
| 4032 | Adenocarcinoma | JARID1D   | 0        | -3.727566 |  |
| 4033 | Adenocarcinoma | RIMKLB    | 0.009664 | -3.714023 |  |
| 4034 | Adenocarcinoma | PCDH9     | 0        | -3.700223 |  |
| 4035 | Adenocarcinoma | CAPN13    | 0        | -3.658466 |  |
| 4036 | Adenocarcinoma | CES2      | 0.000229 | -3.655126 |  |
| 4037 | Adenocarcinoma | TUBAL3    | 0.00023  | -3.650291 |  |
| 4038 | Adenocarcinoma | PCK1      | 0.000292 | -3.635801 |  |
| 4039 | Adenocarcinoma | HEPACAM2  | 0.00047  | -3.61294  |  |
| 4040 | Adenocarcinoma | FLJ38379  | 0        | -3.608873 |  |
| 4041 | Adenocarcinoma | PALLD     | 0.011243 | -3.58331  |  |
| 4042 | Adenocarcinoma | CYB5B     | 0.000508 | -3.579075 |  |
| 4043 | Adenocarcinoma | MAOA      | 0.00002  | -3.573062 |  |
| 4044 | Adenocarcinoma | ZNF483    | 0.00139  | -3.550036 |  |
| 4045 | Adenocarcinoma | CES3      | 0.000071 | -3.541904 |  |
| 4046 | Adenocarcinoma | GPT       | 0.000045 | -3.535019 |  |
| 4047 | Adenocarcinoma | ITM2C     | 0        | -3.52899  |  |
| 4048 | Adenocarcinoma | SCUBE2    | 0        | -3.527884 |  |

|      |                |              |          |           |  |
|------|----------------|--------------|----------|-----------|--|
| 4049 | Adenocarcinoma | CNTN3        | 0.000217 | -3.524586 |  |
| 4050 | Adenocarcinoma | SULT1B1      | 0.000027 | -3.521881 |  |
| 4051 | Adenocarcinoma | RFX6         | 0.000515 | -3.498165 |  |
| 4052 | Adenocarcinoma | SPATA17      | 0.024221 | -3.493367 |  |
| 4053 | Adenocarcinoma | SLC17A4      | 0.000614 | -3.493234 |  |
| 4054 | Adenocarcinoma | CRHBP        | 0.000022 | -3.460216 |  |
| 4055 | Adenocarcinoma | LOC100508909 | 0.000124 | -3.458099 |  |
| 4056 | Adenocarcinoma | VILL         | 0.000078 | -3.451077 |  |
| 4057 | Adenocarcinoma | RDH5         | 0.000083 | -3.450638 |  |
| 4058 | Adenocarcinoma | NAP1L2       | 0.000003 | -3.425142 |  |
| 4059 | Adenocarcinoma | SLC38A4      | 0.000772 | -3.421945 |  |
| 4060 | Adenocarcinoma | ANGPT2       | 0.036078 | -3.420177 |  |
| 4061 | Adenocarcinoma | DSCR1L1      | 0        | -3.414215 |  |
| 4062 | Adenocarcinoma | MFGE8        | 0.018949 | -3.402006 |  |
| 4063 | Adenocarcinoma | HAPLN3       | 0.042984 | -3.398351 |  |
| 4064 | Adenocarcinoma | SCARA5       | 0.000018 | -3.382623 |  |
| 4065 | Adenocarcinoma | MIB2         | 0.029988 | -3.380345 |  |
| 4066 | Adenocarcinoma | UGT1A1       | 0.000008 | -3.369615 |  |
| 4067 | Adenocarcinoma | EYA2         | 0.000292 | -3.360873 |  |
| 4068 | Adenocarcinoma | SF3B3        | 0.018215 | -3.356775 |  |
| 4069 | Adenocarcinoma | IGLV4-60     | 0.000904 | -3.356766 |  |
| 4070 | Adenocarcinoma | CKMT1A       | 0.000012 | -3.35529  |  |
| 4071 | Adenocarcinoma | FRMD1        | 0.000195 | -3.352684 |  |
| 4072 | Adenocarcinoma | PCDH20       | 0.000651 | -3.343165 |  |
| 4073 | Adenocarcinoma | FRZB         | 0        | -3.333763 |  |
| 4074 | Adenocarcinoma | GRIA3        | 0.000081 | -3.324625 |  |
| 4075 | Adenocarcinoma | GCNT3        | 0.000089 | -3.318624 |  |
| 4076 | Adenocarcinoma | PCDH19       | 0.000016 | -3.31126  |  |
| 4077 | Adenocarcinoma | PDE6A        | 0.000883 | -3.297526 |  |
| 4078 | Adenocarcinoma | HHLA2        | 0.000288 | -3.269107 |  |
| 4079 | Adenocarcinoma | ZBTB7C       | 0.000141 | -3.266716 |  |
| 4080 | Adenocarcinoma | FABP1        | 0.000007 | -3.261659 |  |
| 4081 | Adenocarcinoma | DEFB1        | 0.000319 | -3.249128 |  |
| 4082 | Adenocarcinoma | ABI3BP       | 0.00013  | -3.247527 |  |
| 4083 | Adenocarcinoma | KCNE2        | 0.000013 | -3.246601 |  |
| 4084 | Adenocarcinoma | LOC100506591 | 0.000001 | -3.241716 |  |
| 4085 | Adenocarcinoma | ZFP37        | 0.001264 | -3.238204 |  |
| 4086 | Adenocarcinoma | GRIN2A       | 0.000005 | -3.236666 |  |
| 4087 | Adenocarcinoma | LOC644768    | 0.016103 | -3.233501 |  |
| 4088 | Adenocarcinoma | CACNA2D2     | 0.000088 | -3.22725  |  |
| 4089 | Adenocarcinoma | WFDC2        | 0.00064  | -3.224515 |  |
| 4090 | Adenocarcinoma | AMPD1        | 0.000073 | -3.220971 |  |
| 4091 | Adenocarcinoma | DBN1         | 0.016198 | -3.210761 |  |
| 4092 | Adenocarcinoma | UPP1         | 0.025227 | -3.191424 |  |
| 4093 | Adenocarcinoma | B4GALNT4     | 0.002911 | -3.173298 |  |
| 4094 | Adenocarcinoma | ZZEF1        | 0.000261 | -3.16765  |  |
| 4095 | Adenocarcinoma | ADAMTSL1     | 0.000071 | -3.164431 |  |
| 4096 | Adenocarcinoma | GFRA1        | 0.000011 | -3.150197 |  |
| 4097 | Adenocarcinoma | HAPLN1       | 0.000036 | -3.142222 |  |
| 4098 | Adenocarcinoma | SCN9A        | 0.027295 | -3.140818 |  |

|      |                |           |          |           |  |
|------|----------------|-----------|----------|-----------|--|
| 4099 | Adenocarcinoma | B4GALNT2  | 0.000254 | -3.139801 |  |
| 4100 | Adenocarcinoma | TMEM178   | 0.014645 | -3.135835 |  |
| 4101 | Adenocarcinoma | LDHD      | 0.000027 | -3.129231 |  |
| 4102 | Adenocarcinoma | PCBP3     | 0.012595 | -3.124921 |  |
| 4103 | Adenocarcinoma | PHLPP2    | 0.000004 | -3.124354 |  |
| 4104 | Adenocarcinoma | HES5      | 0.000044 | -3.121633 |  |
| 4105 | Adenocarcinoma | EXD3      | 0.000012 | -3.121086 |  |
| 4106 | Adenocarcinoma | SH2D6     | 0.000009 | -3.104952 |  |
| 4107 | Adenocarcinoma | ANK2      | 0.003982 | -3.104127 |  |
| 4108 | Adenocarcinoma | CACNA1H   | 0.016916 | -3.097672 |  |
| 4109 | Adenocarcinoma | PAPSS2    | 0.000007 | -3.090265 |  |
| 4110 | Adenocarcinoma | TMEM72    | 0.000079 | -3.087539 |  |
| 4111 | Adenocarcinoma | FBLN1     | 0        | -3.084209 |  |
| 4112 | Adenocarcinoma | PRSS36    | 0.016942 | -3.080705 |  |
| 4113 | Adenocarcinoma | CEACAM1   | 0.000043 | -3.080438 |  |
| 4114 | Adenocarcinoma | LOC285878 | 0.000002 | -3.080395 |  |
| 4115 | Adenocarcinoma | SLC16A9   | 0.000347 | -3.076333 |  |
| 4116 | Adenocarcinoma | SMO       | 0.002554 | -3.073195 |  |
| 4117 | Adenocarcinoma | NFATC1    | 0.002194 | -3.070761 |  |
| 4118 | Adenocarcinoma | FAM150B   | 0.000003 | -3.058634 |  |
| 4119 | Adenocarcinoma | CDKL1     | 0.000668 | -3.054882 |  |
| 4120 | Adenocarcinoma | METTL7A   | 0.000069 | -3.051391 |  |
| 4121 | Adenocarcinoma | KLF4      | 0.000031 | -3.042323 |  |
| 4122 | Adenocarcinoma | DLG4      | 0.002446 | -3.042022 |  |
| 4123 | Adenocarcinoma | KIF16B    | 0.000012 | -3.030102 |  |
| 4124 | Adenocarcinoma | CCDC68    | 0.000028 | -3.028445 |  |
| 4125 | Adenocarcinoma | PTMS      | 0.001302 | -3.02596  |  |
| 4126 | Adenocarcinoma | SPINK2    | 0.000162 | -3.0247   |  |
| 4127 | Adenocarcinoma | ZNF662    | 0.000025 | -3.018874 |  |
| 4128 | Adenocarcinoma | GFRA2     | 0.000011 | -3.012423 |  |
| 4129 | Adenocarcinoma | PCSK1N    | 0.008874 | -2.986282 |  |
| 4130 | Adenocarcinoma | TTC23     | 0.000018 | -2.979335 |  |
| 4131 | Adenocarcinoma | GRIK2     | 0.000184 | -2.978048 |  |
| 4132 | Adenocarcinoma | FAM46C    | 0.000015 | -2.977186 |  |
| 4133 | Adenocarcinoma | DOCK4     | 0.001516 | -2.975124 |  |
| 4134 | Adenocarcinoma | C9orf24   | 0.000511 | -2.974354 |  |
| 4135 | Adenocarcinoma | IGFBP2    | 0.000009 | -2.971447 |  |
| 4136 | Adenocarcinoma | CLCN4     | 0.035854 | -2.971417 |  |
| 4137 | Adenocarcinoma | RASGEF1A  | 0.015566 | -2.957298 |  |
| 4138 | Adenocarcinoma | USP7      | 0.000112 | -2.951311 |  |
| 4139 | Adenocarcinoma | TFDP1     | 0.004751 | -2.946349 |  |
| 4140 | Adenocarcinoma | C2orf14   | 0.009811 | -2.939705 |  |
| 4141 | Adenocarcinoma | CHL1      | 0        | -2.93542  |  |
| 4142 | Adenocarcinoma | THRB      | 0.000477 | -2.92102  |  |
| 4143 | Adenocarcinoma | ETHE1     | 0.000003 | -2.915623 |  |
| 4144 | Adenocarcinoma | TNFRSF17  | 0        | -2.910197 |  |
| 4145 | Adenocarcinoma | FAM189A1  | 0.000032 | -2.904059 |  |
| 4146 | Adenocarcinoma | PMFBP1    | 0.015446 | -2.902076 |  |
| 4147 | Adenocarcinoma | CELA3B    | 0.000095 | -2.901027 |  |
| 4148 | Adenocarcinoma | B3GALT5   | 0        | -2.892246 |  |

|      |                |          |          |           |  |
|------|----------------|----------|----------|-----------|--|
| 4149 | Adenocarcinoma | TMEM171  | 0.000043 | -2.885524 |  |
| 4150 | Adenocarcinoma | KLRB1    | 0        | -2.8841   |  |
| 4151 | Adenocarcinoma | BCHE     | 0.000148 | -2.873688 |  |
| 4152 | Adenocarcinoma | PRKAR2B  | 0.000238 | -2.861024 |  |
| 4153 | Adenocarcinoma | MRE11A   | 0        | -2.859549 |  |
| 4154 | Adenocarcinoma | PPP1R12B | 0        | -2.859112 |  |
| 4155 | Adenocarcinoma | CDKN1C   | 0.002964 | -2.858738 |  |
| 4156 | Adenocarcinoma | DPT      | 0        | -2.856891 |  |
| 4157 | Adenocarcinoma | PDGFRA   | 0.000026 | -2.841994 |  |
| 4158 | Adenocarcinoma | ZDHHC8P  | 0.032276 | -2.837954 |  |
| 4159 | Adenocarcinoma | KRT20    | 0.000255 | -2.836996 |  |
| 4160 | Adenocarcinoma | NDUFAF4  | 0.000015 | -2.827497 |  |
| 4161 | Adenocarcinoma | DHRS7C   | 0.000528 | -2.814171 |  |
| 4162 | Adenocarcinoma | SLC1A7   | 0.000015 | -2.805395 |  |
| 4163 | Adenocarcinoma | ZBTB1    | 0.014641 | -2.799238 |  |
| 4164 | Adenocarcinoma | ENHO     | 0.000267 | -2.795258 |  |
| 4165 | Adenocarcinoma | DSCAML1  | 0.00004  | -2.791862 |  |
| 4166 | Adenocarcinoma | SGK1     | 0.000007 | -2.786882 |  |
| 4167 | Adenocarcinoma | SIGLEC1  | 0.000004 | -2.786226 |  |
| 4168 | Adenocarcinoma | HTR4     | 0.000108 | -2.785586 |  |
| 4169 | Adenocarcinoma | HMGCS2   | 0.000347 | -2.784072 |  |
| 4170 | Adenocarcinoma | KIAA1683 | 0.000381 | -2.781161 |  |
| 4171 | Adenocarcinoma | DSC2     | 0.000053 | -2.779295 |  |
| 4172 | Adenocarcinoma | ETFDH    | 0.000023 | -2.757237 |  |
| 4173 | Adenocarcinoma | GSN      | 0        | -2.753586 |  |
| 4174 | Adenocarcinoma | KIAA1430 | 0.035483 | -2.748274 |  |
| 4175 | Adenocarcinoma | KIAA0319 | 0.000411 | -2.747012 |  |
| 4176 | Adenocarcinoma | TMEM56   | 0.000041 | -2.746816 |  |
| 4177 | Adenocarcinoma | CCDC18   | 0        | -2.745822 |  |
| 4178 | Adenocarcinoma | SYDE1    | 0.01648  | -2.738516 |  |
| 4179 | Adenocarcinoma | DCN      | 0        | -2.734984 |  |
| 4180 | Adenocarcinoma | PRKG2    | 0.000925 | -2.733283 |  |
| 4181 | Adenocarcinoma | TCEA2    | 0.015902 | -2.730884 |  |
| 4182 | Adenocarcinoma | GPD1L    | 0.000012 | -2.724242 |  |
| 4183 | Adenocarcinoma | MMP17    | 0.000352 | -2.72376  |  |
| 4184 | Adenocarcinoma | CCNB3    | 0.011381 | -2.721795 |  |
| 4185 | Adenocarcinoma | PHGR1    | 0.000007 | -2.72038  |  |
| 4186 | Adenocarcinoma | C4orf34  | 0.000284 | -2.70772  |  |
| 4187 | Adenocarcinoma | FTH1     | 0        | -2.706549 |  |
| 4188 | Adenocarcinoma | FGF9     | 0.000671 | -2.701905 |  |
| 4189 | Adenocarcinoma | C1orf115 | 0.000028 | -2.700641 |  |
| 4190 | Adenocarcinoma | LIFR     | 0.000886 | -2.695526 |  |
| 4191 | Adenocarcinoma | PRIC285  | 0        | -2.689612 |  |
| 4192 | Adenocarcinoma | SQRDL    | 0.000007 | -2.686297 |  |
| 4193 | Adenocarcinoma | RBM47    | 0.00004  | -2.686042 |  |
| 4194 | Adenocarcinoma | CCDC88A  | 0.008983 | -2.677126 |  |
| 4195 | Adenocarcinoma | MYO1A    | 0.000243 | -2.673352 |  |
| 4196 | Adenocarcinoma | SRPX     | 0.00029  | -2.663967 |  |
| 4197 | Adenocarcinoma | FMO5     | 0.000299 | -2.660514 |  |
| 4198 | Adenocarcinoma | PTGER4   | 0        | -2.652074 |  |

|      |                |           |          |           |  |
|------|----------------|-----------|----------|-----------|--|
| 4199 | Adenocarcinoma | FAM55A    | 0.000402 | -2.645677 |  |
| 4200 | Adenocarcinoma | USP2      | 0.000085 | -2.636411 |  |
| 4201 | Adenocarcinoma | PIR       | 0.036703 | -2.634643 |  |
| 4202 | Adenocarcinoma | PTPRZ1    | 0.000041 | -2.633858 |  |
| 4203 | Adenocarcinoma | MALL      | 0.00003  | -2.631392 |  |
| 4204 | Adenocarcinoma | KRT24     | 0.000012 | -2.625213 |  |
| 4205 | Adenocarcinoma | SOS2      | 0.0023   | -2.623539 |  |
| 4206 | Adenocarcinoma | TMEM25    | 0.007064 | -2.614747 |  |
| 4207 | Adenocarcinoma | C4orf19   | 0.000122 | -2.613077 |  |
| 4208 | Adenocarcinoma | CLU       | 0.000096 | -2.607711 |  |
| 4209 | Adenocarcinoma | CORO2B    | 0.000078 | -2.602121 |  |
| 4210 | Adenocarcinoma | SSPN      | 0        | -2.600631 |  |
| 4211 | Adenocarcinoma | BCAS3     | 0.006133 | -2.599382 |  |
| 4212 | Adenocarcinoma | FOXA1     | 0.000292 | -2.593877 |  |
| 4213 | Adenocarcinoma | STOX2     | 0.000242 | -2.591556 |  |
| 4214 | Adenocarcinoma | SCNN1B    | 0        | -2.586467 |  |
| 4215 | Adenocarcinoma | GYLTL1B   | 0.009026 | -2.582526 |  |
| 4216 | Adenocarcinoma | BMP2      | 0.000162 | -2.579571 |  |
| 4217 | Adenocarcinoma | FGD1      | 0.009411 | -2.575283 |  |
| 4218 | Adenocarcinoma | GPA33     | 0.000186 | -2.573758 |  |
| 4219 | Adenocarcinoma | PECI      | 0.000276 | -2.573106 |  |
| 4220 | Adenocarcinoma | CD36      | 0.000013 | -2.571099 |  |
| 4221 | Adenocarcinoma | SMEK2     | 0.000543 | -2.568301 |  |
| 4222 | Adenocarcinoma | WDR78     | 0.00079  | -2.565834 |  |
| 4223 | Adenocarcinoma | C2orf72   | 0.000037 | -2.559506 |  |
| 4224 | Adenocarcinoma | L3MBTL3   | 0.010271 | -2.554239 |  |
| 4225 | Adenocarcinoma | SFRP1     | 0.000885 | -2.554028 |  |
| 4226 | Adenocarcinoma | JAG1      | 0.031742 | -2.55137  |  |
| 4227 | Adenocarcinoma | MUM1L1    | 0.000125 | -2.545621 |  |
| 4228 | Adenocarcinoma | TCEA3     | 0.000297 | -2.544402 |  |
| 4229 | Adenocarcinoma | LOC286467 | 0.013368 | -2.533699 |  |
| 4230 | Adenocarcinoma | CDC14A    | 0.000013 | -2.52973  |  |
| 4231 | Adenocarcinoma | DST       | 0.002601 | -2.519345 |  |
| 4232 | Adenocarcinoma | PDE9A     | 0.000063 | -2.516274 |  |
| 4233 | Adenocarcinoma | SULT1A3   | 0.000217 | -2.511955 |  |
| 4234 | Adenocarcinoma | SLC35A1   | 0.017529 | -2.507512 |  |
| 4235 | Adenocarcinoma | MAF       | 0        | -2.491759 |  |
| 4236 | Adenocarcinoma | DCAF8     | 0.000282 | -2.488817 |  |
| 4237 | Adenocarcinoma | PDAP1     | 0        | -2.486359 |  |
| 4238 | Adenocarcinoma | P2RY1     | 0.000279 | -2.484963 |  |
| 4239 | Adenocarcinoma | POLR3G    | 0.003399 | -2.482919 |  |
| 4240 | Adenocarcinoma | RETSAT    | 0.000202 | -2.47862  |  |
| 4241 | Adenocarcinoma | PGDS      | 0        | -2.473337 |  |
| 4242 | Adenocarcinoma | LPAR1     | 0.000066 | -2.468301 |  |
| 4243 | Adenocarcinoma | BMP2K     | 0.000903 | -2.464008 |  |
| 4244 | Adenocarcinoma | RHOF      | 0.000258 | -2.461934 |  |
| 4245 | Adenocarcinoma | AVIL      | 0.000001 | -2.461099 |  |
| 4246 | Adenocarcinoma | HADH      | 0.000053 | -2.460606 |  |
| 4247 | Adenocarcinoma | A1CF      | 0.000028 | -2.459517 |  |
| 4248 | Adenocarcinoma | COMMD1    | 0.029247 | -2.454604 |  |



|      |                |              |          |           |  |
|------|----------------|--------------|----------|-----------|--|
| 4249 | Adenocarcinoma | TNNT1        | 0.009531 | -2.453879 |  |
| 4250 | Adenocarcinoma | PDE4DIP      | 0.000528 | -2.449105 |  |
| 4251 | Adenocarcinoma | C1orf161     | 0.000928 | -2.442114 |  |
| 4252 | Adenocarcinoma | LOC219347    | 0.000163 | -2.439474 |  |
| 4253 | Adenocarcinoma | PRIMA1       | 0.000018 | -2.435454 |  |
| 4254 | Adenocarcinoma | ASAP3        | 0.000135 | -2.432569 |  |
| 4255 | Adenocarcinoma | KIAA0415     | 0.000053 | -2.431677 |  |
| 4256 | Adenocarcinoma | ZNF781       | 0.019188 | -2.431412 |  |
| 4257 | Adenocarcinoma | ELOVL6       | 0.000034 | -2.429614 |  |
| 4258 | Adenocarcinoma | LANCL3       | 0.000299 | -2.429492 |  |
| 4259 | Adenocarcinoma | DPY19L1      | 0.022989 | -2.429196 |  |
| 4260 | Adenocarcinoma | CDK3         | 0.000077 | -2.425672 |  |
| 4261 | Adenocarcinoma | PTP4A1       | 0.000012 | -2.42263  |  |
| 4262 | Adenocarcinoma | SLC36A1      | 0.000061 | -2.421944 |  |
| 4263 | Adenocarcinoma | SAMD13       | 0.000173 | -2.421725 |  |
| 4264 | Adenocarcinoma | MACROD1      | 0.001816 | -2.420346 |  |
| 4265 | Adenocarcinoma | FA2H         | 0.000221 | -2.420133 |  |
| 4266 | Adenocarcinoma | TDP2         | 0.000009 | -2.417162 |  |
| 4267 | Adenocarcinoma | LTBP4        | 0.00135  | -2.414385 |  |
| 4268 | Adenocarcinoma | CNNM2        | 0.000885 | -2.413334 |  |
| 4269 | Adenocarcinoma | C17orf76     | 0.000252 | -2.408479 |  |
| 4270 | Adenocarcinoma | GPR44        | 0.000131 | -2.40323  |  |
| 4271 | Adenocarcinoma | GNA11        | 0.000116 | -2.400654 |  |
| 4272 | Adenocarcinoma | PGM1         | 0.000017 | -2.39987  |  |
| 4273 | Adenocarcinoma | ENDOD1       | 0        | -2.391819 |  |
| 4274 | Adenocarcinoma | GATM         | 0.000842 | -2.391762 |  |
| 4275 | Adenocarcinoma | CNNM4        | 0.000074 | -2.390598 |  |
| 4276 | Adenocarcinoma | EIF4E3       | 0.000052 | -2.389208 |  |
| 4277 | Adenocarcinoma | SDCBP2       | 0.000135 | -2.388524 |  |
| 4278 | Adenocarcinoma | PLIN1        | 0.000566 | -2.387082 |  |
| 4279 | Adenocarcinoma | SLC22A5      | 0.000006 | -2.383758 |  |
| 4280 | Adenocarcinoma | NAAA         | 0.000629 | -2.377968 |  |
| 4281 | Adenocarcinoma | LOC100289632 | 0.000206 | -2.377517 |  |
| 4282 | Adenocarcinoma | LOC100505483 | 0.000238 | -2.372839 |  |
| 4283 | Adenocarcinoma | ZFP3         | 0.000004 | -2.365486 |  |
| 4284 | Adenocarcinoma | LOC100292909 | 0.000445 | -2.365269 |  |
| 4285 | Adenocarcinoma | MTM1         | 0.000299 | -2.356838 |  |
| 4286 | Adenocarcinoma | C17orf45     | 0.002196 | -2.355972 |  |
| 4287 | Adenocarcinoma | ZNF280C      | 0.005439 | -2.353348 |  |
| 4288 | Adenocarcinoma | USP22        | 0.000098 | -2.348289 |  |
| 4289 | Adenocarcinoma | ACADS        | 0.000036 | -2.347116 |  |
| 4290 | Adenocarcinoma | PLCD3        | 0.000143 | -2.342746 |  |
| 4291 | Adenocarcinoma | SATB2        | 0.000228 | -2.342286 |  |
| 4292 | Adenocarcinoma | GLTP         | 0.000012 | -2.341238 |  |
| 4293 | Adenocarcinoma | CLMN         | 0.000297 | -2.341175 |  |
| 4294 | Adenocarcinoma | SHROOM3      | 0.000168 | -2.337508 |  |
| 4295 | Adenocarcinoma | SMN1         | 0.000037 | -2.337197 |  |
| 4296 | Adenocarcinoma | NQO1         | 0.045197 | -2.337024 |  |
| 4297 | Adenocarcinoma | NT5DC1       | 0.002429 | -2.331847 |  |
| 4298 | Adenocarcinoma | L1CAM        | 0.009183 | -2.330945 |  |

|      |                |           |          |           |  |
|------|----------------|-----------|----------|-----------|--|
| 4299 | Adenocarcinoma | CPT2      | 0.000047 | -2.326475 |  |
| 4300 | Adenocarcinoma | SEZ6L2    | 0.008437 | -2.324393 |  |
| 4301 | Adenocarcinoma | STMN3     | 0.017987 | -2.322412 |  |
| 4302 | Adenocarcinoma | LGALS2    | 0        | -2.3223   |  |
| 4303 | Adenocarcinoma | PAQR3     | 0.000101 | -2.321024 |  |
| 4304 | Adenocarcinoma | APPL2     | 0.000084 | -2.313575 |  |
| 4305 | Adenocarcinoma | ALDH6A1   | 0.000229 | -2.310912 |  |
| 4306 | Adenocarcinoma | LETM1     | 0.000028 | -2.307655 |  |
| 4307 | Adenocarcinoma | SLC44A1   | 0.000107 | -2.300155 |  |
| 4308 | Adenocarcinoma | KLF8      | 0.000744 | -2.298547 |  |
| 4309 | Adenocarcinoma | IDH3A     | 0.000023 | -2.296197 |  |
| 4310 | Adenocarcinoma | PSMG4     | 0.000001 | -2.294456 |  |
| 4311 | Adenocarcinoma | KBTBD11   | 0.000046 | -2.294318 |  |
| 4312 | Adenocarcinoma | CYP1A1    | 0.000543 | -2.287438 |  |
| 4313 | Adenocarcinoma | LRMP      | 0.00005  | -2.283572 |  |
| 4314 | Adenocarcinoma | SIP1      | 0.001898 | -2.282944 |  |
| 4315 | Adenocarcinoma | GLIPR2    | 0.000116 | -2.281672 |  |
| 4316 | Adenocarcinoma | SLC35D1   | 0.000296 | -2.279274 |  |
| 4317 | Adenocarcinoma | RAVER2    | 0.000005 | -2.277227 |  |
| 4318 | Adenocarcinoma | PTGS1     | 0        | -2.277219 |  |
| 4319 | Adenocarcinoma | CMAH      | 0        | -2.27504  |  |
| 4320 | Adenocarcinoma | LOC285016 | 0        | -2.270859 |  |
| 4321 | Adenocarcinoma | PRRT3     | 0.031742 | -2.269879 |  |
| 4322 | Adenocarcinoma | BCL2L15   | 0.000028 | -2.268541 |  |
| 4323 | Adenocarcinoma | MAPT      | 0.000094 | -2.264895 |  |
| 4324 | Adenocarcinoma | MOCS1     | 0.000648 | -2.261519 |  |
| 4325 | Adenocarcinoma | KRT19P2   | 0.000135 | -2.260004 |  |
| 4326 | Adenocarcinoma | PRDX6     | 0.000048 | -2.2515   |  |
| 4327 | Adenocarcinoma | CCNB1IP1  | 0.00089  | -2.251411 |  |
| 4328 | Adenocarcinoma | C12orf35  | 0.012926 | -2.251069 |  |
| 4329 | Adenocarcinoma | SHD       | 0.000098 | -2.248522 |  |
| 4330 | Adenocarcinoma | VGF       | 0.002771 | -2.246975 |  |
| 4331 | Adenocarcinoma | FAM107A   | 0.000228 | -2.246606 |  |
| 4332 | Adenocarcinoma | FLNB      | 0.000297 | -2.244974 |  |
| 4333 | Adenocarcinoma | PEX26     | 0.000241 | -2.233614 |  |
| 4334 | Adenocarcinoma | ATP10A    | 0.000191 | -2.232913 |  |
| 4335 | Adenocarcinoma | ADH1A     | 0.000744 | -2.228283 |  |
| 4336 | Adenocarcinoma | C6orf192  | 0.000017 | -2.2255   |  |
| 4337 | Adenocarcinoma | NGEF      | 0.012939 | -2.22528  |  |
| 4338 | Adenocarcinoma | FAM149A   | 0.000141 | -2.224178 |  |
| 4339 | Adenocarcinoma | HES6      | 0.005871 | -2.223512 |  |
| 4340 | Adenocarcinoma | EPM2A     | 0.00732  | -2.22277  |  |
| 4341 | Adenocarcinoma | ASCC3     | 0.00228  | -2.221894 |  |
| 4342 | Adenocarcinoma | DLEU2     | 0.005991 | -2.219421 |  |
| 4343 | Adenocarcinoma | C6orf136  | 0.000023 | -2.216746 |  |
| 4344 | Adenocarcinoma | ANO10     | 0.000053 | -2.207056 |  |
| 4345 | Adenocarcinoma | FZD5      | 0.000266 | -2.202912 |  |
| 4346 | Adenocarcinoma | NPC1      | 0.005498 | -2.202911 |  |
| 4347 | Adenocarcinoma | GALM      | 0.000162 | -2.201462 |  |
| 4348 | Adenocarcinoma | SRGAP2P1  | 0.040502 | -2.198353 |  |

|      |                |           |          |           |  |
|------|----------------|-----------|----------|-----------|--|
| 4349 | Adenocarcinoma | SYNE1     | 0.004655 | -2.198253 |  |
| 4350 | Adenocarcinoma | LIMA1     | 0.000009 | -2.19754  |  |
| 4351 | Adenocarcinoma | DAPK2     | 0.000157 | -2.196591 |  |
| 4352 | Adenocarcinoma | KATNA1    | 0.000199 | -2.194489 |  |
| 4353 | Adenocarcinoma | GPR34     | 0        | -2.186546 |  |
| 4354 | Adenocarcinoma | OSBPL7    | 0.000066 | -2.183997 |  |
| 4355 | Adenocarcinoma | FKBP5     | 0.000164 | -2.181115 |  |
| 4356 | Adenocarcinoma | AKAP9     | 0        | -2.17955  |  |
| 4357 | Adenocarcinoma | ZNF235    | 0.010992 | -2.173037 |  |
| 4358 | Adenocarcinoma | MIER3     | 0.000032 | -2.171328 |  |
| 4359 | Adenocarcinoma | LRRC56    | 0.016442 | -2.171161 |  |
| 4360 | Adenocarcinoma | CUL4A     | 0.003765 | -2.169395 |  |
| 4361 | Adenocarcinoma | GBA2      | 0.000285 | -2.169336 |  |
| 4362 | Adenocarcinoma | ZDHHC14   | 0.001595 | -2.159739 |  |
| 4363 | Adenocarcinoma | CDS1      | 0.000028 | -2.155889 |  |
| 4364 | Adenocarcinoma | MXD1      | 0.000104 | -2.154847 |  |
| 4365 | Adenocarcinoma | MYO1D     | 0.000211 | -2.153935 |  |
| 4366 | Adenocarcinoma | SLAMF7    | 0        | -2.153695 |  |
| 4367 | Adenocarcinoma | LTA4H     | 0.002101 | -2.153022 |  |
| 4368 | Adenocarcinoma | C9orf125  | 0.000112 | -2.151976 |  |
| 4369 | Adenocarcinoma | OSBPL1A   | 0.000137 | -2.149565 |  |
| 4370 | Adenocarcinoma | PPIL3     | 0.001382 | -2.146776 |  |
| 4371 | Adenocarcinoma | ATOH8     | 0.000883 | -2.140852 |  |
| 4372 | Adenocarcinoma | MGC13053  | 0.030623 | -2.132961 |  |
| 4373 | Adenocarcinoma | UQCRC1    | 0.000063 | -2.132919 |  |
| 4374 | Adenocarcinoma | STAP2     | 0.000189 | -2.132629 |  |
| 4375 | Adenocarcinoma | NPY       | 0.000112 | -2.125373 |  |
| 4376 | Adenocarcinoma | GOLGA2B   | 0.000001 | -2.124954 |  |
| 4377 | Adenocarcinoma | PAQR8     | 0.000098 | -2.124901 |  |
| 4378 | Adenocarcinoma | LQK1      | 0.016981 | -2.123736 |  |
| 4379 | Adenocarcinoma | C14orf159 | 0.000015 | -2.122629 |  |
| 4380 | Adenocarcinoma | IQCH      | 0.036289 | -2.122224 |  |
| 4381 | Adenocarcinoma | TST       | 0.000007 | -2.12104  |  |
| 4382 | Adenocarcinoma | ABCA5     | 0        | -2.119836 |  |
| 4383 | Adenocarcinoma | PLD1      | 0.000135 | -2.115702 |  |
| 4384 | Adenocarcinoma | GLOD5     | 0.000271 | -2.113893 |  |
| 4385 | Adenocarcinoma | MRPL35    | 0.000297 | -2.11346  |  |
| 4386 | Adenocarcinoma | LOC440173 | 0.005212 | -2.113276 |  |
| 4387 | Adenocarcinoma | SRI       | 0.000263 | -2.112696 |  |
| 4388 | Adenocarcinoma | NHSL1     | 0.012222 | -2.106623 |  |
| 4389 | Adenocarcinoma | RBKS      | 0.02468  | -2.104914 |  |
| 4390 | Adenocarcinoma | ICOSLG    | 0.010816 | -2.101714 |  |
| 4391 | Adenocarcinoma | GLCCI1    | 0.000282 | -2.101006 |  |
| 4392 | Adenocarcinoma | PCDHA6    | 0.000109 | -2.10056  |  |
| 4393 | Adenocarcinoma | ZNF512B   | 0.000971 | -2.099994 |  |
| 4394 | Adenocarcinoma | SULT1A4   | 0.041846 | -2.099947 |  |
| 4395 | Adenocarcinoma | PDSS2     | 0.000052 | -2.099445 |  |
| 4396 | Adenocarcinoma | PPARGC1A  | 0.000582 | -2.097672 |  |
| 4397 | Adenocarcinoma | BCL2      | 0.000006 | -2.095351 |  |
| 4398 | Adenocarcinoma | CBX7      | 0        | -2.092974 |  |

|      |                |          |          |           |  |
|------|----------------|----------|----------|-----------|--|
| 4399 | Adenocarcinoma | CASD1    | 0.00029  | -2.091419 |  |
| 4400 | Adenocarcinoma | FLNC     | 0.004847 | -2.088416 |  |
| 4401 | Adenocarcinoma | CHODL    | 0        | -2.088244 |  |
| 4402 | Adenocarcinoma | CYP2E1   | 0.014868 | -2.085049 |  |
| 4403 | Adenocarcinoma | CDC14B   | 0.012127 | -2.084686 |  |
| 4404 | Adenocarcinoma | GREB1    | 0.01461  | -2.083184 |  |
| 4405 | Adenocarcinoma | FAM57A   | 0.000002 | -2.081282 |  |
| 4406 | Adenocarcinoma | SLCO2A1  | 0        | -2.079539 |  |
| 4407 | Adenocarcinoma | IFRD1    | 0.008114 | -2.074017 |  |
| 4408 | Adenocarcinoma | PKN1     | 0.011259 | -2.070597 |  |
| 4409 | Adenocarcinoma | CALM1    | 0.00025  | -2.069654 |  |
| 4410 | Adenocarcinoma | GDPD5    | 0.016985 | -2.067767 |  |
| 4411 | Adenocarcinoma | TP53I3   | 0.000116 | -2.067676 |  |
| 4412 | Adenocarcinoma | ATG4A    | 0.000012 | -2.067547 |  |
| 4413 | Adenocarcinoma | ACAT1    | 0.000077 | -2.066848 |  |
| 4414 | Adenocarcinoma | FRYL     | 0        | -2.063168 |  |
| 4415 | Adenocarcinoma | SHPK     | 0.000083 | -2.058742 |  |
| 4416 | Adenocarcinoma | TSC22D3  | 0        | -2.056851 |  |
| 4417 | Adenocarcinoma | UGP2     | 0.00004  | -2.056388 |  |
| 4418 | Adenocarcinoma | ASNS     | 0.014034 | -2.055824 |  |
| 4419 | Adenocarcinoma | SCGB2A1  | 0        | -2.055265 |  |
| 4420 | Adenocarcinoma | PARVB    | 0.005278 | -2.054067 |  |
| 4421 | Adenocarcinoma | BCAR3    | 0.00004  | -2.053906 |  |
| 4422 | Adenocarcinoma | LRRC3B   | 0.000693 | -2.049939 |  |
| 4423 | Adenocarcinoma | A2LD1    | 0.008161 | -2.049601 |  |
| 4424 | Adenocarcinoma | ACSF2    | 0.000282 | -2.048502 |  |
| 4425 | Adenocarcinoma | BRP44L   | 0.000027 | -2.046297 |  |
| 4426 | Adenocarcinoma | TMED8    | 0.042885 | -2.045735 |  |
| 4427 | Adenocarcinoma | ENY2     | 0.004086 | -2.045432 |  |
| 4428 | Adenocarcinoma | DLL1     | 0        | -2.044593 |  |
| 4429 | Adenocarcinoma | CMAS     | 0.000052 | -2.042658 |  |
| 4430 | Adenocarcinoma | ABHD3    | 0.000238 | -2.042615 |  |
| 4431 | Adenocarcinoma | S100A14  | 0.000183 | -2.042127 |  |
| 4432 | Adenocarcinoma | MTRF1L   | 0.002296 | -2.041783 |  |
| 4433 | Adenocarcinoma | SLC26A6  | 0.003129 | -2.041744 |  |
| 4434 | Adenocarcinoma | HIBCH    | 0.000127 | -2.041443 |  |
| 4435 | Adenocarcinoma | EIF1B    | 0.000508 | -2.038089 |  |
| 4436 | Adenocarcinoma | VWA5B2   | 0.018618 | -2.036685 |  |
| 4437 | Adenocarcinoma | ST7L     | 0        | -2.034764 |  |
| 4438 | Adenocarcinoma | C10orf11 | 0.011491 | -2.032364 |  |
| 4439 | Adenocarcinoma | CAPN5    | 0.000138 | -2.031624 |  |
| 4440 | Adenocarcinoma | TRPM4    | 0.000312 | -2.029588 |  |
| 4441 | Adenocarcinoma | STRADB   | 0.005989 | -2.02463  |  |
| 4442 | Adenocarcinoma | DACT2    | 0.000588 | -2.023093 |  |
| 4443 | Adenocarcinoma | AIFM3    | 0.000415 | -2.023087 |  |
| 4444 | Adenocarcinoma | SMU1     | 0        | -2.016487 |  |
| 4445 | Adenocarcinoma | SSBP2    | 0.000699 | -2.016057 |  |
| 4446 | Adenocarcinoma | MTUS1    | 0.000071 | -2.012135 |  |
| 4447 | Adenocarcinoma | LRRFIP2  | 0.000067 | -2.011938 |  |
| 4448 | Adenocarcinoma | VSIG2    | 0        | -2.008233 |  |

|      |                |           |          |           |  |
|------|----------------|-----------|----------|-----------|--|
| 4449 | Adenocarcinoma | MFAP4     | 0        | -2.007624 |  |
| 4450 | Adenocarcinoma | IMPDH2    | 0.004059 | -2.005733 |  |
| 4451 | Adenocarcinoma | ITGA7     | 0.012048 | -2.005136 |  |
| 4452 | Adenocarcinoma | STAG3     | 0.000114 | -2.003641 |  |
| 4453 | Adenocarcinoma | KLHL34    | 0.039552 | -2.003225 |  |
| 4454 | Adenocarcinoma | BDH1      | 0.00027  | -2.003198 |  |
| 4455 | Adenocarcinoma | ROPN1     | 0.000748 | -2.002696 |  |
| 4456 | Adenocarcinoma | MLLT4     | 0.000011 | 2.000196  |  |
| 4457 | Adenocarcinoma | TARBP1    | 0.018222 | 2.002354  |  |
| 4458 | Adenocarcinoma | AGFG2     | 0.001534 | 2.002586  |  |
| 4459 | Adenocarcinoma | CCNE2     | 0.012386 | 2.00458   |  |
| 4460 | Adenocarcinoma | PLEKHF2   | 0.01482  | 2.005755  |  |
| 4461 | Adenocarcinoma | TMC6      | 0.007496 | 2.008402  |  |
| 4462 | Adenocarcinoma | KIAA0146  | 0.01651  | 2.008495  |  |
| 4463 | Adenocarcinoma | APLP2     | 0.000747 | 2.009413  |  |
| 4464 | Adenocarcinoma | MAP2K5    | 0.005543 | 2.010427  |  |
| 4465 | Adenocarcinoma | CABLES1   | 0.042929 | 2.010532  |  |
| 4466 | Adenocarcinoma | RNF10     | 0.011082 | 2.010613  |  |
| 4467 | Adenocarcinoma | TTC13     | 0.001583 | 2.013917  |  |
| 4468 | Adenocarcinoma | MPZL3     | 0.018949 | 2.016272  |  |
| 4469 | Adenocarcinoma | FLJ14186  | 0.020715 | 2.017305  |  |
| 4470 | Adenocarcinoma | LOC440233 | 0.011545 | 2.022371  |  |
| 4471 | Adenocarcinoma | CTSD      | 0.003264 | 2.022791  |  |
| 4472 | Adenocarcinoma | PEX12     | 0.009672 | 2.023821  |  |
| 4473 | Adenocarcinoma | PIGS      | 0.012617 | 2.023824  |  |
| 4474 | Adenocarcinoma | ZADH2     | 0.003732 | 2.025558  |  |
| 4475 | Adenocarcinoma | LIG3      | 0.005179 | 2.025952  |  |
| 4476 | Adenocarcinoma | CTDSPL2   | 0.003521 | 2.030729  |  |
| 4477 | Adenocarcinoma | SRSF4     | 0.001886 | 2.0322    |  |
| 4478 | Adenocarcinoma | HISPPD2A  | 0.002718 | 2.033578  |  |
| 4479 | Adenocarcinoma | ACAD9     | 0.002388 | 2.034113  |  |
| 4480 | Adenocarcinoma | CHCHD7    | 0.036078 | 2.034328  |  |
| 4481 | Adenocarcinoma | FGGY      | 0.000004 | 2.034343  |  |
| 4482 | Adenocarcinoma | SERPINB1  | 0.003339 | 2.035626  |  |
| 4483 | Adenocarcinoma | C20orf151 | 0.006762 | 2.04069   |  |
| 4484 | Adenocarcinoma | ZNF710    | 0.028376 | 2.042024  |  |
| 4485 | Adenocarcinoma | TDGF1     | 0.000062 | 2.047152  |  |
| 4486 | Adenocarcinoma | FBXL11    | 0.012526 | 2.048065  |  |
| 4487 | Adenocarcinoma | ABHD15    | 0.004987 | 2.050014  |  |
| 4488 | Adenocarcinoma | FAM49B    | 0.028217 | 2.05083   |  |
| 4489 | Adenocarcinoma | RXRA      | 0.002161 | 2.053207  |  |
| 4490 | Adenocarcinoma | TMLHE     | 0.006576 | 2.053379  |  |
| 4491 | Adenocarcinoma | PLA2G12B  | 0.00002  | 2.059122  |  |
| 4492 | Adenocarcinoma | CHRNA5    | 0.017729 | 2.059834  |  |
| 4493 | Adenocarcinoma | SLC7A1    | 0.000292 | 2.065309  |  |
| 4494 | Adenocarcinoma | RNF160    | 0.004704 | 2.065911  |  |
| 4495 | Adenocarcinoma | FURIN     | 0.000396 | 2.067994  |  |
| 4496 | Adenocarcinoma | FAM50A    | 0.035293 | 2.068622  |  |
| 4497 | Adenocarcinoma | FASTKD3   | 0.004758 | 2.069163  |  |
| 4498 | Adenocarcinoma | SLC44A2   | 0.00644  | 2.07083   |  |

|      |                |             |          |          |  |
|------|----------------|-------------|----------|----------|--|
| 4499 | Adenocarcinoma | ST14        | 0.007306 | 2.07137  |  |
| 4500 | Adenocarcinoma | ARV1        | 0.038233 | 2.072915 |  |
| 4501 | Adenocarcinoma | DAP         | 0.013659 | 2.082527 |  |
| 4502 | Adenocarcinoma | ABLIM1      | 0.01873  | 2.083449 |  |
| 4503 | Adenocarcinoma | SYPL1       | 0.026715 | 2.083636 |  |
| 4504 | Adenocarcinoma | CETN2       | 0.008965 | 2.085826 |  |
| 4505 | Adenocarcinoma | DKFZP434F14 | 0.020248 | 2.087216 |  |
| 4506 | Adenocarcinoma | LOC441124   | 0.025198 | 2.087968 |  |
| 4507 | Adenocarcinoma | C15orf57    | 0.028017 | 2.089913 |  |
| 4508 | Adenocarcinoma | SLC9A8      | 0.039552 | 2.0946   |  |
| 4509 | Adenocarcinoma | LOC404266   | 0.042984 | 2.097443 |  |
| 4510 | Adenocarcinoma | RAB3D       | 0.028797 | 2.104136 |  |
| 4511 | Adenocarcinoma | ZNF830      | 0.018226 | 2.105094 |  |
| 4512 | Adenocarcinoma | PHF15       | 0.002689 | 2.106723 |  |
| 4513 | Adenocarcinoma | IGHMBP2     | 0        | 2.107544 |  |
| 4514 | Adenocarcinoma | MRPL13      | 0.045197 | 2.109255 |  |
| 4515 | Adenocarcinoma | ATPBD4      | 0.039632 | 2.110409 |  |
| 4516 | Adenocarcinoma | MBD5        | 0.000286 | 2.110792 |  |
| 4517 | Adenocarcinoma | ATAD5       | 0.01731  | 2.112755 |  |
| 4518 | Adenocarcinoma | XDH         | 0.011897 | 2.113082 |  |
| 4519 | Adenocarcinoma | TPD52L2     | 0.000076 | 2.120266 |  |
| 4520 | Adenocarcinoma | WDR52       | 0.012397 | 2.122044 |  |
| 4521 | Adenocarcinoma | KIAA1370    | 0.00136  | 2.123193 |  |
| 4522 | Adenocarcinoma | C11orf80    | 0.000048 | 2.123685 |  |
| 4523 | Adenocarcinoma | ATAD2       | 0.03939  | 2.124891 |  |
| 4524 | Adenocarcinoma | GIN51       | 0.000928 | 2.126108 |  |
| 4525 | Adenocarcinoma | SNX12       | 0.025932 | 2.126917 |  |
| 4526 | Adenocarcinoma | BMP4        | 0        | 2.128916 |  |
| 4527 | Adenocarcinoma | FGFR4       | 0.000252 | 2.129458 |  |
| 4528 | Adenocarcinoma | PEX11A      | 0.007955 | 2.13103  |  |
| 4529 | Adenocarcinoma | CPEB3       | 0.014097 | 2.132011 |  |
| 4530 | Adenocarcinoma | CYP4F3      | 0.000099 | 2.13287  |  |
| 4531 | Adenocarcinoma | DPP8        | 0.018275 | 2.135528 |  |
| 4532 | Adenocarcinoma | SLC12A2     | 0.000235 | 2.139849 |  |
| 4533 | Adenocarcinoma | BRCA2       | 0.010457 | 2.141749 |  |
| 4534 | Adenocarcinoma | FAM111A     | 0.007069 | 2.156683 |  |
| 4535 | Adenocarcinoma | OPCML       | 0.010676 | 2.157732 |  |
| 4536 | Adenocarcinoma | ZBTB26      | 0.017602 | 2.15914  |  |
| 4537 | Adenocarcinoma | DMXL2       | 0.017847 | 2.159518 |  |
| 4538 | Adenocarcinoma | BCAP31      | 0.026776 | 2.161095 |  |
| 4539 | Adenocarcinoma | UCA1        | 0.000017 | 2.16163  |  |
| 4540 | Adenocarcinoma | IFI27L1     | 0.041846 | 2.171184 |  |
| 4541 | Adenocarcinoma | TRANK1      | 0.00427  | 2.178654 |  |
| 4542 | Adenocarcinoma | TDRD7       | 0.017108 | 2.182988 |  |
| 4543 | Adenocarcinoma | LOC399744   | 0.020248 | 2.193034 |  |
| 4544 | Adenocarcinoma | ACE2        | 0.000003 | 2.193072 |  |
| 4545 | Adenocarcinoma | RBL2        | 0.013185 | 2.193334 |  |
| 4546 | Adenocarcinoma | CD59        | 0.040114 | 2.197907 |  |
| 4547 | Adenocarcinoma | LOC401357   | 0.020715 | 2.199755 |  |
| 4548 | Adenocarcinoma | MAP7D2      | 0.000082 | 2.203802 |  |

|      |                |          |          |          |  |
|------|----------------|----------|----------|----------|--|
| 4549 | Adenocarcinoma | KIAA1217 | 0.017918 | 2.205406 |  |
| 4550 | Adenocarcinoma | LGALS8   | 0.000526 | 2.205876 |  |
| 4551 | Adenocarcinoma | SPG11    | 0.006445 | 2.206429 |  |
| 4552 | Adenocarcinoma | HSD17B4  | 0.012331 | 2.209442 |  |
| 4553 | Adenocarcinoma | N4BP2L2  | 0.000223 | 2.213151 |  |
| 4554 | Adenocarcinoma | ZNF586   | 0.006751 | 2.217234 |  |
| 4555 | Adenocarcinoma | POMP     | 0.018322 | 2.219702 |  |
| 4556 | Adenocarcinoma | MORC4    | 0.017623 | 2.220515 |  |
| 4557 | Adenocarcinoma | OVOL1    | 0.014986 | 2.224552 |  |
| 4558 | Adenocarcinoma | RAI14    | 0.000238 | 2.235023 |  |
| 4559 | Adenocarcinoma | KCNAB2   | 0.014467 | 2.235303 |  |
| 4560 | Adenocarcinoma | IL9R     | 0.004811 | 2.23845  |  |
| 4561 | Adenocarcinoma | ZNF321   | 0.00555  | 2.240933 |  |
| 4562 | Adenocarcinoma | PIGU     | 0.007058 | 2.241053 |  |
| 4563 | Adenocarcinoma | ZNF37B   | 0.014132 | 2.245885 |  |
| 4564 | Adenocarcinoma | PDIA6    | 0.030623 | 2.24798  |  |
| 4565 | Adenocarcinoma | WBP4     | 0.002242 | 2.250237 |  |
| 4566 | Adenocarcinoma | TMEM206  | 0.000151 | 2.251382 |  |
| 4567 | Adenocarcinoma | EREG     | 0.000001 | 2.274809 |  |
| 4568 | Adenocarcinoma | CCDC144A | 0.002615 | 2.282153 |  |
| 4569 | Adenocarcinoma | CYHR1    | 0.042984 | 2.282635 |  |
| 4570 | Adenocarcinoma | PPP1R3D  | 0.007247 | 2.284234 |  |
| 4571 | Adenocarcinoma | CYP2B6   | 0.000389 | 2.285989 |  |
| 4572 | Adenocarcinoma | FAM65B   | 0.005425 | 2.287983 |  |
| 4573 | Adenocarcinoma | WNT7B    | 0.010676 | 2.288709 |  |
| 4574 | Adenocarcinoma | PITX2    | 0.000652 | 2.304323 |  |
| 4575 | Adenocarcinoma | FAM110A  | 0.002196 | 2.30707  |  |
| 4576 | Adenocarcinoma | PIK3C2B  | 0.0016   | 2.314515 |  |
| 4577 | Adenocarcinoma | CPD      | 0.00152  | 2.315221 |  |
| 4578 | Adenocarcinoma | MYC      | 0.000043 | 2.32116  |  |
| 4579 | Adenocarcinoma | ROD1     | 0.011852 | 2.323082 |  |
| 4580 | Adenocarcinoma | CHMP4B   | 0.007819 | 2.329571 |  |
| 4581 | Adenocarcinoma | NCOA3    | 0.010373 | 2.330103 |  |
| 4582 | Adenocarcinoma | NAPRT1   | 0.00448  | 2.334459 |  |
| 4583 | Adenocarcinoma | KIAA0101 | 0.000736 | 2.338754 |  |
| 4584 | Adenocarcinoma | SNX19    | 0.015688 | 2.338817 |  |
| 4585 | Adenocarcinoma | CBFA2T2  | 0.003492 | 2.340377 |  |
| 4586 | Adenocarcinoma | C13orf27 | 0.000057 | 2.341832 |  |
| 4587 | Adenocarcinoma | DYNLL1   | 0.000048 | 2.343521 |  |
| 4588 | Adenocarcinoma | ZNF816A  | 0.014441 | 2.344824 |  |
| 4589 | Adenocarcinoma | DGAT2    | 0.002791 | 2.344958 |  |
| 4590 | Adenocarcinoma | TCF19    | 0.000751 | 2.347528 |  |
| 4591 | Adenocarcinoma | JAG2     | 0.000098 | 2.357991 |  |
| 4592 | Adenocarcinoma | C22orf29 | 0.011787 | 2.366756 |  |
| 4593 | Adenocarcinoma | SLC15A2  | 0.000136 | 2.368835 |  |
| 4594 | Adenocarcinoma | FLJ45445 | 0.020715 | 2.37061  |  |
| 4595 | Adenocarcinoma | ITPKB    | 0.005735 | 2.373689 |  |
| 4596 | Adenocarcinoma | FLJ45340 | 0.038464 | 2.377321 |  |
| 4597 | Adenocarcinoma | CMTM7    | 0.04009  | 2.379482 |  |
| 4598 | Adenocarcinoma | GCC2     | 0.013908 | 2.380315 |  |

|      |                |           |          |          |  |
|------|----------------|-----------|----------|----------|--|
| 4599 | Adenocarcinoma | RAPGEFL1  | 0.009411 | 2.382267 |  |
| 4600 | Adenocarcinoma | FXYD5     | 0.018523 | 2.391601 |  |
| 4601 | Adenocarcinoma | TNFRSF11B | 0.000263 | 2.412846 |  |
| 4602 | Adenocarcinoma | IFITM3    | 0        | 2.427902 |  |
| 4603 | Adenocarcinoma | TDRKH     | 0.000822 | 2.431352 |  |
| 4604 | Adenocarcinoma | LINC00265 | 0.03724  | 2.437513 |  |
| 4605 | Adenocarcinoma | LOC254057 | 0.007004 | 2.439625 |  |
| 4606 | Adenocarcinoma | TOP1MT    | 0.000095 | 2.441191 |  |
| 4607 | Adenocarcinoma | TSPAN31   | 0.000926 | 2.442075 |  |
| 4608 | Adenocarcinoma | C9orf127  | 0.000268 | 2.449939 |  |
| 4609 | Adenocarcinoma | LOC153684 | 0.012193 | 2.456051 |  |
| 4610 | Adenocarcinoma | CBX2      | 0.000072 | 2.45772  |  |
| 4611 | Adenocarcinoma | ZNF148    | 0.036078 | 2.459233 |  |
| 4612 | Adenocarcinoma | TRAPPC6A  | 0.01862  | 2.471927 |  |
| 4613 | Adenocarcinoma | ELL3      | 0.002258 | 2.478822 |  |
| 4614 | Adenocarcinoma | ENTPD6    | 0.018279 | 2.494725 |  |
| 4615 | Adenocarcinoma | RAD21     | 0.026732 | 2.504876 |  |
| 4616 | Adenocarcinoma | C19orf40  | 0.014467 | 2.506698 |  |
| 4617 | Adenocarcinoma | AMIGO2    | 0.000027 | 2.510275 |  |
| 4618 | Adenocarcinoma | ATP2C2    | 0.01685  | 2.511174 |  |
| 4619 | Adenocarcinoma | IRAK1     | 0.03394  | 2.518028 |  |
| 4620 | Adenocarcinoma | ITGA2     | 0.001489 | 2.52092  |  |
| 4621 | Adenocarcinoma | DOPEY2    | 0.002288 | 2.524589 |  |
| 4622 | Adenocarcinoma | LOC388796 | 0.000056 | 2.525723 |  |
| 4623 | Adenocarcinoma | ASCL2     | 0.000003 | 2.526144 |  |
| 4624 | Adenocarcinoma | IFFO2     | 0.016092 | 2.532587 |  |
| 4625 | Adenocarcinoma | GTF2H1    | 0.004072 | 2.534975 |  |
| 4626 | Adenocarcinoma | UBE2D3    | 0.003021 | 2.554795 |  |
| 4627 | Adenocarcinoma | CCDC144B  | 0.018374 | 2.555585 |  |
| 4628 | Adenocarcinoma | PAN3      | 0.001597 | 2.557215 |  |
| 4629 | Adenocarcinoma | IFITM1    | 0        | 2.566659 |  |
| 4630 | Adenocarcinoma | SPTY2D1   | 0.003619 | 2.569926 |  |
| 4631 | Adenocarcinoma | SNX5      | 0.010029 | 2.577579 |  |
| 4632 | Adenocarcinoma | LOC283859 | 0.000002 | 2.593191 |  |
| 4633 | Adenocarcinoma | RND3      | 0.001702 | 2.605872 |  |
| 4634 | Adenocarcinoma | PPP1R3B   | 0.016459 | 2.606331 |  |
| 4635 | Adenocarcinoma | C7orf38   | 0.006848 | 2.612116 |  |
| 4636 | Adenocarcinoma | RGNEF     | 0.006426 | 2.615305 |  |
| 4637 | Adenocarcinoma | CYFIP1    | 0.000034 | 2.616223 |  |
| 4638 | Adenocarcinoma | AZGP1     | 0        | 2.626652 |  |
| 4639 | Adenocarcinoma | AKAP11    | 0.014979 | 2.628001 |  |
| 4640 | Adenocarcinoma | AFF1      | 0.005425 | 2.628107 |  |
| 4641 | Adenocarcinoma | PURA      | 0.003342 | 2.664896 |  |
| 4642 | Adenocarcinoma | COBLL1    | 0.016908 | 2.668886 |  |
| 4643 | Adenocarcinoma | PBX3      | 0.025527 | 2.669613 |  |
| 4644 | Adenocarcinoma | APOL2     | 0.01821  | 2.698816 |  |
| 4645 | Adenocarcinoma | CLIC3     | 0.000063 | 2.704234 |  |
| 4646 | Adenocarcinoma | TTC30B    | 0.006274 | 2.752626 |  |
| 4647 | Adenocarcinoma | TIMP1     | 0        | 2.756339 |  |
| 4648 | Adenocarcinoma | GPR143    | 0        | 2.760934 |  |



|      |                |              |          |          |  |
|------|----------------|--------------|----------|----------|--|
| 4649 | Adenocarcinoma | MUC4         | 0.012425 | 2.762498 |  |
| 4650 | Adenocarcinoma | UHMK1        | 0.002791 | 2.783461 |  |
| 4651 | Adenocarcinoma | FAM122C      | 0.003202 | 2.78738  |  |
| 4652 | Adenocarcinoma | GRM8         | 0        | 2.795039 |  |
| 4653 | Adenocarcinoma | ZC3H12A      | 0.00122  | 2.795748 |  |
| 4654 | Adenocarcinoma | TMED3        | 0.006285 | 2.798591 |  |
| 4655 | Adenocarcinoma | C11orf54     | 0.008977 | 2.808257 |  |
| 4656 | Adenocarcinoma | LCMT2        | 0.010346 | 2.822198 |  |
| 4657 | Adenocarcinoma | CCDC132      | 0.000536 | 2.831538 |  |
| 4658 | Adenocarcinoma | CATSPER2     | 0.018483 | 2.833397 |  |
| 4659 | Adenocarcinoma | SCCPDH       | 0.006988 | 2.849435 |  |
| 4660 | Adenocarcinoma | LOC100131257 | 0.012388 | 2.851215 |  |
| 4661 | Adenocarcinoma | TMEM62       | 0.027993 | 2.856251 |  |
| 4662 | Adenocarcinoma | FARP1        | 0.026674 | 2.881692 |  |
| 4663 | Adenocarcinoma | FAM71F2      | 0.011727 | 2.884242 |  |
| 4664 | Adenocarcinoma | COL1A1       | 0.000263 | 2.887807 |  |
| 4665 | Adenocarcinoma | TANK         | 0.023542 | 2.892938 |  |
| 4666 | Adenocarcinoma | ABCC2        | 0.000964 | 2.897253 |  |
| 4667 | Adenocarcinoma | ABCC6        | 0        | 2.910024 |  |
| 4668 | Adenocarcinoma | GRHL1        | 0.013773 | 2.937916 |  |
| 4669 | Adenocarcinoma | BBC3         | 0.027568 | 2.941099 |  |
| 4670 | Adenocarcinoma | SERINC5      | 0.021028 | 2.946837 |  |
| 4671 | Adenocarcinoma | RNF43        | 0.003329 | 2.958404 |  |
| 4672 | Adenocarcinoma | ENC1         | 0.009294 | 2.966357 |  |
| 4673 | Adenocarcinoma | PNPT1        | 0.014572 | 3.010962 |  |
| 4674 | Adenocarcinoma | ACSL6        | 0        | 3.021882 |  |
| 4675 | Adenocarcinoma | PDK4         | 0.01686  | 3.077281 |  |
| 4676 | Adenocarcinoma | TATDN1       | 0.026409 | 3.102705 |  |
| 4677 | Adenocarcinoma | SMAD7        | 0.017651 | 3.151831 |  |
| 4678 | Adenocarcinoma | CXCL3        | 0        | 3.22057  |  |
| 4679 | Adenocarcinoma | CELP         | 0.000551 | 3.237431 |  |
| 4680 | Adenocarcinoma | FLJ37464     | 0.010554 | 3.330586 |  |
| 4681 | Adenocarcinoma | SPATA2       | 0.037223 | 3.39365  |  |
| 4682 | Adenocarcinoma | PTP4A3       | 0.000168 | 3.409801 |  |
| 4683 | Adenocarcinoma | PPM1H        | 0.000249 | 3.479492 |  |
| 4684 | Adenocarcinoma | SDR16C5      | 0.002619 | 3.493107 |  |
| 4685 | Adenocarcinoma | DTX3L        | 0.013671 | 3.496114 |  |
| 4686 | Adenocarcinoma | SLC27A2      | 0.008191 | 3.496874 |  |
| 4687 | Adenocarcinoma | THNSL2       | 0.006697 | 3.507126 |  |
| 4688 | Adenocarcinoma | CXCL1        | 0        | 3.562836 |  |
| 4689 | Adenocarcinoma | LBA1         | 0.005487 | 3.581658 |  |
| 4690 | Adenocarcinoma | PADI1        | 0.013528 | 3.590778 |  |
| 4691 | Adenocarcinoma | CAPG         | 0.024028 | 3.592218 |  |
| 4692 | Adenocarcinoma | SEMA4A       | 0.013238 | 3.598787 |  |
| 4693 | Adenocarcinoma | SNTB1        | 0.000297 | 3.60564  |  |
| 4694 | Adenocarcinoma | LY6G6D       | 0        | 3.652899 |  |
| 4695 | Adenocarcinoma | PVRL4        | 0.027295 | 3.701049 |  |
| 4696 | Adenocarcinoma | RELL1        | 0.002229 | 3.822744 |  |
| 4697 | Adenocarcinoma | ATPIF1       | 0.002194 | 3.844013 |  |
| 4698 | Adenocarcinoma | TGFBR3       | 0.00996  | 3.84745  |  |

|      |                         |          |          |           |  |
|------|-------------------------|----------|----------|-----------|--|
| 4699 | Adenocarcinoma          | STK39    | 0.020248 | 3.866313  |  |
| 4700 | Adenocarcinoma          | ACOT4    | 0.02204  | 3.910514  |  |
| 4701 | Adenocarcinoma          | AGT      | 0        | 3.928558  |  |
| 4702 | Adenocarcinoma          | DGKH     | 0.001127 | 3.936771  |  |
| 4703 | Adenocarcinoma          | LAMP3    | 0.015046 | 3.989819  |  |
| 4704 | Adenocarcinoma          | CFB      | 0        | 4.05669   |  |
| 4705 | Adenocarcinoma          | AIM1     | 0.010382 | 4.087678  |  |
| 4706 | Adenocarcinoma          | ANKRD56  | 0.005986 | 4.091798  |  |
| 4707 | Adenocarcinoma          | TRIB1    | 0.03724  | 4.19406   |  |
| 4708 | Adenocarcinoma          | TNFSF15  | 0.004444 | 4.207166  |  |
| 4709 | Adenocarcinoma          | NFKBIZ   | 0.000107 | 4.258509  |  |
| 4710 | Adenocarcinoma          | NF1      | 0.002911 | 4.274836  |  |
| 4711 | Adenocarcinoma          | CD14     | 0.004876 | 4.275405  |  |
| 4712 | Adenocarcinoma          | SYTL2    | 0.000034 | 4.459447  |  |
| 4713 | Adenocarcinoma          | AQP3     | 0.011612 | 4.731538  |  |
| 4714 | Adenocarcinoma          | IGFL4    | 0.005425 | 4.858818  |  |
| 4715 | Adenocarcinoma          | PHF11    | 0.007757 | 4.871831  |  |
| 4716 | Adenocarcinoma          | PLA2R1   | 0.015492 | 4.90688   |  |
| 4717 | Adenocarcinoma          | GNE      | 0.007974 | 5.119714  |  |
| 4718 | Adenocarcinoma          | CRIM1    | 0.000358 | 5.229024  |  |
| 4719 | Adenocarcinoma          | ZSCAN29  | 0.008183 | 5.250697  |  |
| 4720 | Adenocarcinoma          | SERTAD4  | 0.020576 | 5.290643  |  |
| 4721 | Adenocarcinoma          | C10orf4  | 0.003603 | 5.589526  |  |
| 4722 | Adenocarcinoma          | TTC39B   | 0.001303 | 5.907317  |  |
| 4723 | Adenocarcinoma          | CACNA1D  | 0.009493 | 6.168673  |  |
| 4724 | Adenocarcinoma          | CTSH     | 0.001249 | 6.183643  |  |
| 4725 | Adenocarcinoma          | ZNF776   | 0.015162 | 6.449528  |  |
| 4726 | Adenocarcinoma          | TLE4     | 0.000979 | 6.654461  |  |
| 4727 | Adenocarcinoma          | MGC10981 | 0.006523 | 7.241934  |  |
| 4728 | Adenocarcinoma          | ARL4C    | 0.007496 | 7.491655  |  |
| 4729 | Adenocarcinoma          | C9orf64  | 0.010313 | 7.497865  |  |
| 4730 | Adenocarcinoma          | ARHGEF40 | 0.000006 | 8.995607  |  |
| 4731 | Adenocarcinoma          | PROM2    | 0.001809 | 11.004361 |  |
| 4732 | Adenocarcinoma          | CDH3     | 0.000012 | 12.544509 |  |
| 4733 | Adenocarcinoma          | CLDN1    | 0.000089 | 12.600585 |  |
| 4734 | Adenocarcinoma          | FBP1     | 0.001648 | 16.172329 |  |
| 4735 | Adenocarcinoma of colon | AKR1B10  | 0.00018  | -7.408942 |  |
| 4736 | Adenocarcinoma of colon | ABCG2    | 0.000246 | -6.568358 |  |
| 4737 | Adenocarcinoma of colon | DHRS9    | 0.000007 | -6.14952  |  |
| 4738 | Adenocarcinoma of colon | PKIB     | 0.000009 | -6.113732 |  |
| 4739 | Adenocarcinoma of colon | CHP2     | 0.000168 | -5.791364 |  |
| 4740 | Adenocarcinoma of colon | IL1R2    | 0.000052 | -5.493194 |  |
| 4741 | Adenocarcinoma of colon | GCNT2    | 0.000098 | -4.728089 |  |
| 4742 | Adenocarcinoma of colon | ADH1B    | 0.000129 | -4.601914 |  |
| 4743 | Adenocarcinoma of colon | SLC4A4   | 0.000152 | -4.563736 |  |
| 4744 | Adenocarcinoma of colon | DHRS11   | 0.000021 | -4.552529 |  |
| 4745 | Adenocarcinoma of colon | CWH43    | 0.000237 | -4.42692  |  |
| 4746 | Adenocarcinoma of colon | HSD17B2  | 0.000052 | -4.175568 |  |
| 4747 | Adenocarcinoma of colon | UGT2B15  | 0.000038 | -4.136587 |  |
| 4748 | Adenocarcinoma of colon | PLAC8    | 0.000164 | -4.104069 |  |

|      |                         |          |          |           |  |
|------|-------------------------|----------|----------|-----------|--|
| 4749 | Adenocarcinoma of colon | AGPAT9   | 0.000063 | -4.032915 |  |
| 4750 | Adenocarcinoma of colon | ARHGAP44 | 0.000252 | -4.0241   |  |
| 4751 | Adenocarcinoma of colon | LRRC19   | 0.000069 | -4.006808 |  |
| 4752 | Adenocarcinoma of colon | CA2      | 0.000238 | -3.967964 |  |
| 4753 | Adenocarcinoma of colon | MOGAT2   | 0.000064 | -3.948991 |  |
| 4754 | Adenocarcinoma of colon | UGT2B17  | 0.000072 | -3.933187 |  |
| 4755 | Adenocarcinoma of colon | SCIN     | 0.000238 | -3.855473 |  |
| 4756 | Adenocarcinoma of colon | TSPAN7   | 0.00024  | -3.837825 |  |
| 4757 | Adenocarcinoma of colon | FAM55D   | 0.000219 | -3.823774 |  |
| 4758 | Adenocarcinoma of colon | HPGD     | 0.000201 | -3.819098 |  |
| 4759 | Adenocarcinoma of colon | PADI2    | 0.00016  | -3.803735 |  |
| 4760 | Adenocarcinoma of colon | FXYD3    | 0.000061 | -3.760548 |  |
| 4761 | Adenocarcinoma of colon | ABCA8    | 0.000244 | -3.701992 |  |
| 4762 | Adenocarcinoma of colon | ARL14    | 0.000007 | -3.700351 |  |
| 4763 | Adenocarcinoma of colon | CES2     | 0.000229 | -3.655126 |  |
| 4764 | Adenocarcinoma of colon | TUBAL3   | 0.00023  | -3.650291 |  |
| 4765 | Adenocarcinoma of colon | PCK1     | 0.000292 | -3.635801 |  |
| 4766 | Adenocarcinoma of colon | C10orf99 | 0.000028 | -3.620081 |  |
| 4767 | Adenocarcinoma of colon | MAOA     | 0.00002  | -3.573062 |  |
| 4768 | Adenocarcinoma of colon | CES3     | 0.000071 | -3.541904 |  |
| 4769 | Adenocarcinoma of colon | GPT      | 0.000045 | -3.535019 |  |
| 4770 | Adenocarcinoma of colon | HIGD1A   | 0.000009 | -3.524229 |  |
| 4771 | Adenocarcinoma of colon | SULT1B1  | 0.000027 | -3.521881 |  |
| 4772 | Adenocarcinoma of colon | VILL     | 0.000078 | -3.451077 |  |
| 4773 | Adenocarcinoma of colon | RDH5     | 0.000083 | -3.450638 |  |
| 4774 | Adenocarcinoma of colon | SLC9A2   | 0.000098 | -3.438543 |  |
| 4775 | Adenocarcinoma of colon | ZNF575   | 0.000035 | -3.378636 |  |
| 4776 | Adenocarcinoma of colon | EYA2     | 0.000292 | -3.360873 |  |
| 4777 | Adenocarcinoma of colon | CKMT1A   | 0.000012 | -3.35529  |  |
| 4778 | Adenocarcinoma of colon | NR3C2    | 0.000074 | -3.350237 |  |
| 4779 | Adenocarcinoma of colon | AHCYL2   | 0.000007 | -3.330288 |  |
| 4780 | Adenocarcinoma of colon | GCNT3    | 0.000089 | -3.318624 |  |
| 4781 | Adenocarcinoma of colon | C2orf88  | 0.000052 | -3.296037 |  |
| 4782 | Adenocarcinoma of colon | HHLA2    | 0.000288 | -3.269107 |  |
| 4783 | Adenocarcinoma of colon | ZBTB7C   | 0.000141 | -3.266716 |  |
| 4784 | Adenocarcinoma of colon | FABP1    | 0.000007 | -3.261659 |  |
| 4785 | Adenocarcinoma of colon | CA12     | 0.00004  | -3.220574 |  |
| 4786 | Adenocarcinoma of colon | STMN2    | 0.00025  | -3.185564 |  |
| 4787 | Adenocarcinoma of colon | ZZEF1    | 0.000261 | -3.16765  |  |
| 4788 | Adenocarcinoma of colon | PLCE1    | 0.000012 | -3.149416 |  |
| 4789 | Adenocarcinoma of colon | SCGN     | 0.000292 | -3.132719 |  |
| 4790 | Adenocarcinoma of colon | LDHD     | 0.000027 | -3.129231 |  |
| 4791 | Adenocarcinoma of colon | PAPSS2   | 0.000007 | -3.090265 |  |
| 4792 | Adenocarcinoma of colon | CEACAM1  | 0.000043 | -3.080438 |  |
| 4793 | Adenocarcinoma of colon | METTL7A  | 0.000069 | -3.051391 |  |
| 4794 | Adenocarcinoma of colon | KLF4     | 0.000031 | -3.042323 |  |
| 4795 | Adenocarcinoma of colon | KIF16B   | 0.000012 | -3.030102 |  |
| 4796 | Adenocarcinoma of colon | CCDC68   | 0.000028 | -3.028445 |  |
| 4797 | Adenocarcinoma of colon | SULT1A2  | 0.000079 | -2.995262 |  |
| 4798 | Adenocarcinoma of colon | TTC23    | 0.000018 | -2.979335 |  |

|      |                         |           |          |           |  |
|------|-------------------------|-----------|----------|-----------|--|
| 4799 | Adenocarcinoma of colon | FAM46C    | 0.000015 | -2.977186 |  |
| 4800 | Adenocarcinoma of colon | DENND2A   | 0.000061 | -2.97707  |  |
| 4801 | Adenocarcinoma of colon | TSPAN1    | 0.000226 | -2.971613 |  |
| 4802 | Adenocarcinoma of colon | SULT1A1   | 0.000206 | -2.925544 |  |
| 4803 | Adenocarcinoma of colon | ETHE1     | 0.000003 | -2.915623 |  |
| 4804 | Adenocarcinoma of colon | TMEM171   | 0.000043 | -2.885524 |  |
| 4805 | Adenocarcinoma of colon | PRKAR2B   | 0.000238 | -2.861024 |  |
| 4806 | Adenocarcinoma of colon | KRT20     | 0.000255 | -2.836996 |  |
| 4807 | Adenocarcinoma of colon | CLDN23    | 0.0002   | -2.834475 |  |
| 4808 | Adenocarcinoma of colon | LOC400573 | 0.000123 | -2.834344 |  |
| 4809 | Adenocarcinoma of colon | SLC1A7    | 0.000015 | -2.805395 |  |
| 4810 | Adenocarcinoma of colon | MMP28     | 0.000034 | -2.79525  |  |
| 4811 | Adenocarcinoma of colon | SGK1      | 0.000007 | -2.786882 |  |
| 4812 | Adenocarcinoma of colon | DSC2      | 0.000053 | -2.779295 |  |
| 4813 | Adenocarcinoma of colon | PPID      | 0.000083 | -2.778977 |  |
| 4814 | Adenocarcinoma of colon | PPP2R3A   | 0.000074 | -2.772831 |  |
| 4815 | Adenocarcinoma of colon | ETFDH     | 0.000023 | -2.757237 |  |
| 4816 | Adenocarcinoma of colon | TMEM56    | 0.000041 | -2.746816 |  |
| 4817 | Adenocarcinoma of colon | GPD1L     | 0.000012 | -2.724242 |  |
| 4818 | Adenocarcinoma of colon | C4orf34   | 0.000284 | -2.70772  |  |
| 4819 | Adenocarcinoma of colon | SQRDL     | 0.000007 | -2.686297 |  |
| 4820 | Adenocarcinoma of colon | RBM47     | 0.00004  | -2.686042 |  |
| 4821 | Adenocarcinoma of colon | MYO1A     | 0.000243 | -2.673352 |  |
| 4822 | Adenocarcinoma of colon | SRPX      | 0.00029  | -2.663967 |  |
| 4823 | Adenocarcinoma of colon | FMO5      | 0.000299 | -2.660514 |  |
| 4824 | Adenocarcinoma of colon | NR5A2     | 0.0003   | -2.636983 |  |
| 4825 | Adenocarcinoma of colon | USP2      | 0.000085 | -2.636411 |  |
| 4826 | Adenocarcinoma of colon | MALL      | 0.00003  | -2.631392 |  |
| 4827 | Adenocarcinoma of colon | KRT24     | 0.000012 | -2.625213 |  |
| 4828 | Adenocarcinoma of colon | CPM       | 0.000051 | -2.621781 |  |
| 4829 | Adenocarcinoma of colon | C4orf19   | 0.000122 | -2.613077 |  |
| 4830 | Adenocarcinoma of colon | FOXA1     | 0.000292 | -2.593877 |  |
| 4831 | Adenocarcinoma of colon | BMP2      | 0.000162 | -2.579571 |  |
| 4832 | Adenocarcinoma of colon | UGDH      | 0.000029 | -2.5748   |  |
| 4833 | Adenocarcinoma of colon | GPA33     | 0.000186 | -2.573758 |  |
| 4834 | Adenocarcinoma of colon | PECI      | 0.000276 | -2.573106 |  |
| 4835 | Adenocarcinoma of colon | C2orf72   | 0.000037 | -2.559506 |  |
| 4836 | Adenocarcinoma of colon | TCEA3     | 0.000297 | -2.544402 |  |
| 4837 | Adenocarcinoma of colon | SULT1A3   | 0.000217 | -2.511955 |  |
| 4838 | Adenocarcinoma of colon | RETSAT    | 0.000202 | -2.47862  |  |
| 4839 | Adenocarcinoma of colon | MYOT      | 0.00017  | -2.475259 |  |
| 4840 | Adenocarcinoma of colon | LPAR1     | 0.000066 | -2.468301 |  |
| 4841 | Adenocarcinoma of colon | RHOF      | 0.000258 | -2.461934 |  |
| 4842 | Adenocarcinoma of colon | HADH      | 0.000053 | -2.460606 |  |
| 4843 | Adenocarcinoma of colon | A1CF      | 0.000028 | -2.459517 |  |
| 4844 | Adenocarcinoma of colon | ASAP3     | 0.000135 | -2.432569 |  |
| 4845 | Adenocarcinoma of colon | KIAA0415  | 0.000053 | -2.431677 |  |
| 4846 | Adenocarcinoma of colon | ELOVL6    | 0.000034 | -2.429614 |  |
| 4847 | Adenocarcinoma of colon | FLJ32063  | 0.000136 | -2.428407 |  |
| 4848 | Adenocarcinoma of colon | PTP4A1    | 0.000012 | -2.42263  |  |

|      |                         |              |          |           |  |
|------|-------------------------|--------------|----------|-----------|--|
| 4849 | Adenocarcinoma of colon | GOLM1        | 0.000252 | -2.421836 |  |
| 4850 | Adenocarcinoma of colon | SAMD13       | 0.000173 | -2.421725 |  |
| 4851 | Adenocarcinoma of colon | FA2H         | 0.000221 | -2.420133 |  |
| 4852 | Adenocarcinoma of colon | TDP2         | 0.000009 | -2.417162 |  |
| 4853 | Adenocarcinoma of colon | C17orf76     | 0.000252 | -2.408479 |  |
| 4854 | Adenocarcinoma of colon | GNA11        | 0.000116 | -2.400654 |  |
| 4855 | Adenocarcinoma of colon | PGM1         | 0.000017 | -2.39987  |  |
| 4856 | Adenocarcinoma of colon | SPPL2A       | 0.000009 | -2.398902 |  |
| 4857 | Adenocarcinoma of colon | CNNM4        | 0.000074 | -2.390598 |  |
| 4858 | Adenocarcinoma of colon | EIF4E3       | 0.000052 | -2.389208 |  |
| 4859 | Adenocarcinoma of colon | SDCBP2       | 0.000135 | -2.388524 |  |
| 4860 | Adenocarcinoma of colon | FAM47E       | 0.000256 | -2.385583 |  |
| 4861 | Adenocarcinoma of colon | LOC100289632 | 0.000206 | -2.377517 |  |
| 4862 | Adenocarcinoma of colon | LOC100287411 | 0.00014  | -2.377259 |  |
| 4863 | Adenocarcinoma of colon | LOC100505483 | 0.000238 | -2.372839 |  |
| 4864 | Adenocarcinoma of colon | MTM1         | 0.000299 | -2.356838 |  |
| 4865 | Adenocarcinoma of colon | USP22        | 0.000098 | -2.348289 |  |
| 4866 | Adenocarcinoma of colon | RUNDC3B      | 0.000168 | -2.344697 |  |
| 4867 | Adenocarcinoma of colon | PLCD3        | 0.000143 | -2.342746 |  |
| 4868 | Adenocarcinoma of colon | GLTP         | 0.000012 | -2.341238 |  |
| 4869 | Adenocarcinoma of colon | CLMN         | 0.000297 | -2.341175 |  |
| 4870 | Adenocarcinoma of colon | SHROOM3      | 0.000168 | -2.337508 |  |
| 4871 | Adenocarcinoma of colon | CPT2         | 0.000047 | -2.326475 |  |
| 4872 | Adenocarcinoma of colon | APPL2        | 0.000084 | -2.313575 |  |
| 4873 | Adenocarcinoma of colon | ALDH6A1      | 0.000229 | -2.310912 |  |
| 4874 | Adenocarcinoma of colon | LETM1        | 0.000028 | -2.307655 |  |
| 4875 | Adenocarcinoma of colon | SLC44A1      | 0.000107 | -2.300155 |  |
| 4876 | Adenocarcinoma of colon | IDH3A        | 0.000023 | -2.296197 |  |
| 4877 | Adenocarcinoma of colon | KBTBD11      | 0.000046 | -2.294318 |  |
| 4878 | Adenocarcinoma of colon | GLIPR2       | 0.000116 | -2.281672 |  |
| 4879 | Adenocarcinoma of colon | SLC35D1      | 0.000296 | -2.279274 |  |
| 4880 | Adenocarcinoma of colon | KRT19P2      | 0.000135 | -2.260004 |  |
| 4881 | Adenocarcinoma of colon | PRDX6        | 0.000048 | -2.2515   |  |
| 4882 | Adenocarcinoma of colon | SHD          | 0.000098 | -2.248522 |  |
| 4883 | Adenocarcinoma of colon | FAM107A      | 0.000228 | -2.246606 |  |
| 4884 | Adenocarcinoma of colon | FLNB         | 0.000297 | -2.244974 |  |
| 4885 | Adenocarcinoma of colon | PEX26        | 0.000241 | -2.233614 |  |
| 4886 | Adenocarcinoma of colon | FAM149A      | 0.000141 | -2.224178 |  |
| 4887 | Adenocarcinoma of colon | C6orf136     | 0.000023 | -2.216746 |  |
| 4888 | Adenocarcinoma of colon | ANO10        | 0.000053 | -2.207056 |  |
| 4889 | Adenocarcinoma of colon | FLJ36848     | 0.000256 | -2.20681  |  |
| 4890 | Adenocarcinoma of colon | FZD5         | 0.000266 | -2.202912 |  |
| 4891 | Adenocarcinoma of colon | GALM         | 0.000162 | -2.201462 |  |
| 4892 | Adenocarcinoma of colon | LIMA1        | 0.000009 | -2.19754  |  |
| 4893 | Adenocarcinoma of colon | OSBPL7       | 0.000066 | -2.183997 |  |
| 4894 | Adenocarcinoma of colon | FKBP5        | 0.000164 | -2.181115 |  |
| 4895 | Adenocarcinoma of colon | GBA2         | 0.000285 | -2.169336 |  |
| 4896 | Adenocarcinoma of colon | CDS1         | 0.000028 | -2.155889 |  |
| 4897 | Adenocarcinoma of colon | MXD1         | 0.000104 | -2.154847 |  |
| 4898 | Adenocarcinoma of colon | MYO1D        | 0.000211 | -2.153935 |  |

|      |                         |              |          |           |  |
|------|-------------------------|--------------|----------|-----------|--|
| 4899 | Adenocarcinoma of colon | C9orf125     | 0.000112 | -2.151976 |  |
| 4900 | Adenocarcinoma of colon | UQCRC1       | 0.000063 | -2.132919 |  |
| 4901 | Adenocarcinoma of colon | STAP2        | 0.000189 | -2.132629 |  |
| 4902 | Adenocarcinoma of colon | PAQR8        | 0.000098 | -2.124901 |  |
| 4903 | Adenocarcinoma of colon | C14orf159    | 0.000015 | -2.122629 |  |
| 4904 | Adenocarcinoma of colon | TST          | 0.000007 | -2.12104  |  |
| 4905 | Adenocarcinoma of colon | PLD1         | 0.000135 | -2.115702 |  |
| 4906 | Adenocarcinoma of colon | GLOD5        | 0.000271 | -2.113893 |  |
| 4907 | Adenocarcinoma of colon | MRPL35       | 0.000297 | -2.11346  |  |
| 4908 | Adenocarcinoma of colon | ATP5S        | 0.000026 | -2.103186 |  |
| 4909 | Adenocarcinoma of colon | GLCCI1       | 0.000282 | -2.101006 |  |
| 4910 | Adenocarcinoma of colon | PCDHA6       | 0.000109 | -2.10056  |  |
| 4911 | Adenocarcinoma of colon | PDSS2        | 0.000052 | -2.099445 |  |
| 4912 | Adenocarcinoma of colon | CASD1        | 0.00029  | -2.091419 |  |
| 4913 | Adenocarcinoma of colon | CALM1        | 0.00025  | -2.069654 |  |
| 4914 | Adenocarcinoma of colon | TP53I3       | 0.000116 | -2.067676 |  |
| 4915 | Adenocarcinoma of colon | ATG4A        | 0.000012 | -2.067547 |  |
| 4916 | Adenocarcinoma of colon | ACAT1        | 0.000077 | -2.066848 |  |
| 4917 | Adenocarcinoma of colon | SHPK         | 0.000083 | -2.058742 |  |
| 4918 | Adenocarcinoma of colon | UGP2         | 0.00004  | -2.056388 |  |
| 4919 | Adenocarcinoma of colon | FXYD1        | 0.000047 | -2.055213 |  |
| 4920 | Adenocarcinoma of colon | BCAR3        | 0.00004  | -2.053906 |  |
| 4921 | Adenocarcinoma of colon | BRP44L       | 0.000027 | -2.046297 |  |
| 4922 | Adenocarcinoma of colon | CMAS         | 0.000052 | -2.042658 |  |
| 4923 | Adenocarcinoma of colon | ABHD3        | 0.000238 | -2.042615 |  |
| 4924 | Adenocarcinoma of colon | S100A14      | 0.000183 | -2.042127 |  |
| 4925 | Adenocarcinoma of colon | HIBCH        | 0.000127 | -2.041443 |  |
| 4926 | Adenocarcinoma of colon | CAPN5        | 0.000138 | -2.031624 |  |
| 4927 | Adenocarcinoma of colon | MTUS1        | 0.000071 | -2.012135 |  |
| 4928 | Adenocarcinoma of colon | LRRFIP2      | 0.000067 | -2.011938 |  |
| 4929 | Adenocarcinoma of colon | SGK2         | 0.000043 | -2.008301 |  |
| 4930 | Adenocarcinoma of colon | BDH1         | 0.00027  | -2.003198 |  |
| 4931 | Adenocarcinoma of colon | LOC100289019 | 0.000053 | -2.00295  |  |
| 4932 | Adenocarcinoma of colon | GRHL2        | 0        | 2.061635  |  |
| 4933 | Adenocarcinoma of colon | TPD52L2      | 0.000076 | 2.120266  |  |
| 4934 | Adenocarcinoma of colon | SLC12A2      | 0.000235 | 2.139849  |  |
| 4935 | Adenocarcinoma of colon | RAI14        | 0.000238 | 2.235023  |  |
| 4936 | Adenocarcinoma of colon | FOXO1        | 0        | 2.245879  |  |
| 4937 | Adenocarcinoma of colon | TMEM206      | 0.000151 | 2.251382  |  |
| 4938 | Adenocarcinoma of colon | MYC          | 0.000043 | 2.32116   |  |
| 4939 | Adenocarcinoma of colon | C13orf27     | 0.000057 | 2.341832  |  |
| 4940 | Adenocarcinoma of colon | JAG2         | 0.000098 | 2.357991  |  |
| 4941 | Adenocarcinoma of colon | TNFRSF11B    | 0.000263 | 2.412846  |  |
| 4942 | Adenocarcinoma of colon | TOP1MT       | 0.000095 | 2.441191  |  |
| 4943 | Adenocarcinoma of colon | CBX2         | 0.000072 | 2.45772   |  |
| 4944 | Adenocarcinoma of colon | AMIGO2       | 0.000027 | 2.510275  |  |
| 4945 | Adenocarcinoma of colon | GPR126       | 0.002669 | 2.512988  |  |
| 4946 | Adenocarcinoma of colon | LOC388796    | 0.000056 | 2.525723  |  |
| 4947 | Adenocarcinoma of colon | CLIC3        | 0.000063 | 2.704234  |  |
| 4948 | Adenocarcinoma of colon | COL18A1      | 0.000076 | 2.847955  |  |

|      |                                   |           |          |            |  |
|------|-----------------------------------|-----------|----------|------------|--|
| 4949 | Adenocarcinoma of colon           | COL1A1    | 0.000263 | 2.887807   |  |
| 4950 | Adenocarcinoma of colon           | PTP4A3    | 0.000168 | 3.409801   |  |
| 4951 | Adenocarcinoma of colon           | PPM1H     | 0.000249 | 3.479492   |  |
| 4952 | Adenocarcinoma of colon           | SNTB1     | 0.000297 | 3.60564    |  |
| 4953 | Adenocarcinoma of colon           | CDH3      | 0.000012 | 12.544509  |  |
| 4954 | Adenocarcinoma of colon           | CLDN1     | 0.000089 | 12.600585  |  |
| 4955 | Adenocarcinoma of large intestine | OSTalpha  | 0.000026 | -47.033402 |  |
| 4956 | Adenocarcinoma of large intestine | MMP7      | 0        | -18.824692 |  |
| 4957 | Adenocarcinoma of large intestine | SLC30A10  | 0.000006 | -16.146988 |  |
| 4958 | Adenocarcinoma of large intestine | FOXQ1     | 0        | -15.928664 |  |
| 4959 | Adenocarcinoma of large intestine | KIAA1199  | 0        | -13.538706 |  |
| 4960 | Adenocarcinoma of large intestine | IL8       | 0        | -12.714234 |  |
| 4961 | Adenocarcinoma of large intestine | CLDN1     | 0        | -10.740069 |  |
| 4962 | Adenocarcinoma of large intestine | VSTM2A    | 0        | -9.14717   |  |
| 4963 | Adenocarcinoma of large intestine | ABCG2     | 0.000006 | -8.486486  |  |
| 4964 | Adenocarcinoma of large intestine | NR1H4     | 0.000846 | -8.412746  |  |
| 4965 | Adenocarcinoma of large intestine | NPY6R     | 0        | -8.003144  |  |
| 4966 | Adenocarcinoma of large intestine | CHP2      | 0        | -7.890496  |  |
| 4967 | Adenocarcinoma of large intestine | CCL23     | 0.000022 | -7.094239  |  |
| 4968 | Adenocarcinoma of large intestine | COL11A1   | 0        | -7.083734  |  |
| 4969 | Adenocarcinoma of large intestine | NRXN1     | 0        | -6.901082  |  |
| 4970 | Adenocarcinoma of large intestine | KANK4     | 0.000582 | -6.736475  |  |
| 4971 | Adenocarcinoma of large intestine | ABCA8     | 0.000001 | -6.705704  |  |
| 4972 | Adenocarcinoma of large intestine | ANGPTL1   | 0.000002 | -6.700761  |  |
| 4973 | Adenocarcinoma of large intestine | CWH43     | 0.000007 | -6.340542  |  |
| 4974 | Adenocarcinoma of large intestine | GNG13     | 0        | -6.173533  |  |
| 4975 | Adenocarcinoma of large intestine | PTGDR     | 0        | -6.016754  |  |
| 4976 | Adenocarcinoma of large intestine | KIAA2022  | 0.000001 | -5.99665   |  |
| 4977 | Adenocarcinoma of large intestine | ADH1C     | 0.00002  | -5.903407  |  |
| 4978 | Adenocarcinoma of large intestine | CDH3      | 0        | -5.7184    |  |
| 4979 | Adenocarcinoma of large intestine | C2orf58   | 0        | -5.665292  |  |
| 4980 | Adenocarcinoma of large intestine | LGI4      | 0        | -5.496047  |  |
| 4981 | Adenocarcinoma of large intestine | PHLDA1    | 0        | -5.471027  |  |
| 4982 | Adenocarcinoma of large intestine | CDH19     | 0        | -5.453266  |  |
| 4983 | Adenocarcinoma of large intestine | RGS13     | 0        | -5.365318  |  |
| 4984 | Adenocarcinoma of large intestine | SVOPL     | 0        | -5.28447   |  |
| 4985 | Adenocarcinoma of large intestine | PCSK2     | 0.000018 | -5.268769  |  |
| 4986 | Adenocarcinoma of large intestine | UGT2B15   | 0.00016  | -5.249733  |  |
| 4987 | Adenocarcinoma of large intestine | SCN7A     | 0        | -5.18474   |  |
| 4988 | Adenocarcinoma of large intestine | SYNE2     | 0.000007 | -5.052631  |  |
| 4989 | Adenocarcinoma of large intestine | BMP3      | 0.00004  | -4.988584  |  |
| 4990 | Adenocarcinoma of large intestine | LOC144501 | 0        | -4.899047  |  |
| 4991 | Adenocarcinoma of large intestine | SORCS1    | 0        | -4.888339  |  |
| 4992 | Adenocarcinoma of large intestine | KCNV1     | 0        | -4.774511  |  |
| 4993 | Adenocarcinoma of large intestine | PDZD3     | 0.000026 | -4.758979  |  |
| 4994 | Adenocarcinoma of large intestine | DPP10     | 0.000008 | -4.664912  |  |
| 4995 | Adenocarcinoma of large intestine | TEX11     | 0.000007 | -4.646122  |  |
| 4996 | Adenocarcinoma of large intestine | LOC389023 | 0.000323 | -4.643267  |  |
| 4997 | Adenocarcinoma of large intestine | COL1A2    | 0        | -4.622895  |  |
| 4998 | Adenocarcinoma of large intestine | BGN       | 0        | -4.605698  |  |

|      |                                   |              |          |           |  |
|------|-----------------------------------|--------------|----------|-----------|--|
| 4999 | Adenocarcinoma of large intestine | C7           | 0.000004 | -4.513299 |  |
| 5000 | Adenocarcinoma of large intestine | WSCD1        | 0.000004 | -4.401202 |  |
| 5001 | Adenocarcinoma of large intestine | BMX          | 0        | -4.36962  |  |
| 5002 | Adenocarcinoma of large intestine | LRRN2        | 0.000038 | -4.27253  |  |
| 5003 | Adenocarcinoma of large intestine | SLC7A5       | 0        | -4.182042 |  |
| 5004 | Adenocarcinoma of large intestine | ATP1A2       | 0.000005 | -4.144251 |  |
| 5005 | Adenocarcinoma of large intestine | UGT1A8       | 0.000039 | -4.117387 |  |
| 5006 | Adenocarcinoma of large intestine | TRIB3        | 0        | -4.096233 |  |
| 5007 | Adenocarcinoma of large intestine | NFE2L3       | 0        | -4.056847 |  |
| 5008 | Adenocarcinoma of large intestine | ESM1         | 0        | -4.042148 |  |
| 5009 | Adenocarcinoma of large intestine | SLC26A2      | 0.000445 | -3.928833 |  |
| 5010 | Adenocarcinoma of large intestine | SOX10        | 0        | -3.805372 |  |
| 5011 | Adenocarcinoma of large intestine | BMP5         | 0.000002 | -3.798608 |  |
| 5012 | Adenocarcinoma of large intestine | TGFB1        | 0        | -3.780405 |  |
| 5013 | Adenocarcinoma of large intestine | AKR1B10      | 0.000036 | -3.779094 |  |
| 5014 | Adenocarcinoma of large intestine | PCDH9        | 0        | -3.700223 |  |
| 5015 | Adenocarcinoma of large intestine | CAPN13       | 0        | -3.658466 |  |
| 5016 | Adenocarcinoma of large intestine | RUNDC3B      | 0.000001 | -3.626594 |  |
| 5017 | Adenocarcinoma of large intestine | HEPACAM2     | 0.00047  | -3.61294  |  |
| 5018 | Adenocarcinoma of large intestine | FLJ38379     | 0        | -3.608873 |  |
| 5019 | Adenocarcinoma of large intestine | FLJ13391     | 0        | -3.591249 |  |
| 5020 | Adenocarcinoma of large intestine | SCUBE2       | 0        | -3.527884 |  |
| 5021 | Adenocarcinoma of large intestine | CNTN3        | 0.000217 | -3.524586 |  |
| 5022 | Adenocarcinoma of large intestine | TIMP1        | 0        | -3.518513 |  |
| 5023 | Adenocarcinoma of large intestine | RFX6         | 0.000515 | -3.498165 |  |
| 5024 | Adenocarcinoma of large intestine | SLC17A4      | 0.000614 | -3.493234 |  |
| 5025 | Adenocarcinoma of large intestine | ETV4         | 0        | -3.474337 |  |
| 5026 | Adenocarcinoma of large intestine | CRHBP        | 0.000022 | -3.460216 |  |
| 5027 | Adenocarcinoma of large intestine | LOC100508909 | 0.000124 | -3.458099 |  |
| 5028 | Adenocarcinoma of large intestine | C2orf88      | 0.000402 | -3.444938 |  |
| 5029 | Adenocarcinoma of large intestine | NAP1L2       | 0.000003 | -3.425142 |  |
| 5030 | Adenocarcinoma of large intestine | SLC38A4      | 0.000772 | -3.421945 |  |
| 5031 | Adenocarcinoma of large intestine | SALL4        | 0        | -3.38018  |  |
| 5032 | Adenocarcinoma of large intestine | UGT1A1       | 0.000008 | -3.369615 |  |
| 5033 | Adenocarcinoma of large intestine | IGLV4-60     | 0.000904 | -3.356766 |  |
| 5034 | Adenocarcinoma of large intestine | DHRS11       | 0.000073 | -3.355101 |  |
| 5035 | Adenocarcinoma of large intestine | FRMD1        | 0.000195 | -3.352684 |  |
| 5036 | Adenocarcinoma of large intestine | FLJ32063     | 0.000003 | -3.350273 |  |
| 5037 | Adenocarcinoma of large intestine | PCDH20       | 0.000651 | -3.343165 |  |
| 5038 | Adenocarcinoma of large intestine | GRIA3        | 0.000081 | -3.324625 |  |
| 5039 | Adenocarcinoma of large intestine | PCDH19       | 0.000016 | -3.31126  |  |
| 5040 | Adenocarcinoma of large intestine | PDE6A        | 0.000883 | -3.297526 |  |
| 5041 | Adenocarcinoma of large intestine | PDPN         | 0        | -3.271364 |  |
| 5042 | Adenocarcinoma of large intestine | DEFB1        | 0.000319 | -3.249128 |  |
| 5043 | Adenocarcinoma of large intestine | KCNE2        | 0.000013 | -3.246601 |  |
| 5044 | Adenocarcinoma of large intestine | LOC100506591 | 0.000001 | -3.241716 |  |
| 5045 | Adenocarcinoma of large intestine | GRIN2A       | 0.000005 | -3.236666 |  |
| 5046 | Adenocarcinoma of large intestine | CA12         | 0.000051 | -3.229288 |  |
| 5047 | Adenocarcinoma of large intestine | CACNA2D2     | 0.000088 | -3.22725  |  |
| 5048 | Adenocarcinoma of large intestine | WFDC2        | 0.00064  | -3.224515 |  |



|      |                                   |              |          |           |  |
|------|-----------------------------------|--------------|----------|-----------|--|
| 5049 | Adenocarcinoma of large intestine | AMPD1        | 0.000073 | -3.220971 |  |
| 5050 | Adenocarcinoma of large intestine | ADAMTSL1     | 0.000071 | -3.164431 |  |
| 5051 | Adenocarcinoma of large intestine | GFRA1        | 0.000011 | -3.150197 |  |
| 5052 | Adenocarcinoma of large intestine | HAPLN1       | 0.000036 | -3.142222 |  |
| 5053 | Adenocarcinoma of large intestine | B4GALNT2     | 0.000254 | -3.139801 |  |
| 5054 | Adenocarcinoma of large intestine | ARHGAP44     | 0.000001 | -3.126782 |  |
| 5055 | Adenocarcinoma of large intestine | PHLPP2       | 0.000004 | -3.124354 |  |
| 5056 | Adenocarcinoma of large intestine | HES5         | 0.000044 | -3.121633 |  |
| 5057 | Adenocarcinoma of large intestine | EXD3         | 0.000012 | -3.121086 |  |
| 5058 | Adenocarcinoma of large intestine | C10orf99     | 0.000092 | -3.112238 |  |
| 5059 | Adenocarcinoma of large intestine | SH2D6        | 0.000009 | -3.104952 |  |
| 5060 | Adenocarcinoma of large intestine | SLC4A4       | 0.00007  | -3.104855 |  |
| 5061 | Adenocarcinoma of large intestine | TMEM72       | 0.000079 | -3.087539 |  |
| 5062 | Adenocarcinoma of large intestine | LOC285878    | 0.000002 | -3.080395 |  |
| 5063 | Adenocarcinoma of large intestine | CDC25B       | 0        | -3.070827 |  |
| 5064 | Adenocarcinoma of large intestine | FAM150B      | 0.000003 | -3.058634 |  |
| 5065 | Adenocarcinoma of large intestine | CDKL1        | 0.000668 | -3.054882 |  |
| 5066 | Adenocarcinoma of large intestine | SPINK2       | 0.000162 | -3.0247   |  |
| 5067 | Adenocarcinoma of large intestine | ZNF662       | 0.000025 | -3.018874 |  |
| 5068 | Adenocarcinoma of large intestine | GFRA2        | 0.000011 | -3.012423 |  |
| 5069 | Adenocarcinoma of large intestine | GRIK2        | 0.000184 | -2.978048 |  |
| 5070 | Adenocarcinoma of large intestine | C9orf24      | 0.000511 | -2.974354 |  |
| 5071 | Adenocarcinoma of large intestine | IGFBP2       | 0.000009 | -2.971447 |  |
| 5072 | Adenocarcinoma of large intestine | ARL14        | 0.000094 | -2.965791 |  |
| 5073 | Adenocarcinoma of large intestine | LRRC19       | 0.000619 | -2.954561 |  |
| 5074 | Adenocarcinoma of large intestine | USP7         | 0.000112 | -2.951311 |  |
| 5075 | Adenocarcinoma of large intestine | THRB         | 0.000477 | -2.92102  |  |
| 5076 | Adenocarcinoma of large intestine | LRP8         | 0        | -2.905623 |  |
| 5077 | Adenocarcinoma of large intestine | FAM189A1     | 0.000032 | -2.904059 |  |
| 5078 | Adenocarcinoma of large intestine | CELA3B       | 0.000095 | -2.901027 |  |
| 5079 | Adenocarcinoma of large intestine | BCHE         | 0.000148 | -2.873688 |  |
| 5080 | Adenocarcinoma of large intestine | PDGFRA       | 0.000026 | -2.841994 |  |
| 5081 | Adenocarcinoma of large intestine | DHRS7C       | 0.000528 | -2.814171 |  |
| 5082 | Adenocarcinoma of large intestine | ENHO         | 0.000267 | -2.795258 |  |
| 5083 | Adenocarcinoma of large intestine | DSCAML1      | 0.00004  | -2.791862 |  |
| 5084 | Adenocarcinoma of large intestine | SIGLEC1      | 0.000004 | -2.786226 |  |
| 5085 | Adenocarcinoma of large intestine | HMGCS2       | 0.000347 | -2.784072 |  |
| 5086 | Adenocarcinoma of large intestine | KIAA1683     | 0.000381 | -2.781161 |  |
| 5087 | Adenocarcinoma of large intestine | FXYD1        | 0.000052 | -2.759432 |  |
| 5088 | Adenocarcinoma of large intestine | KIAA0319     | 0.000411 | -2.747012 |  |
| 5089 | Adenocarcinoma of large intestine | PRKG2        | 0.000925 | -2.733283 |  |
| 5090 | Adenocarcinoma of large intestine | CPM          | 0.000638 | -2.731148 |  |
| 5091 | Adenocarcinoma of large intestine | PHGR1        | 0.000007 | -2.72038  |  |
| 5092 | Adenocarcinoma of large intestine | PADI2        | 0.00005  | -2.707104 |  |
| 5093 | Adenocarcinoma of large intestine | FGF9         | 0.000671 | -2.701905 |  |
| 5094 | Adenocarcinoma of large intestine | C1orf115     | 0.000028 | -2.700641 |  |
| 5095 | Adenocarcinoma of large intestine | LIFR         | 0.000886 | -2.695526 |  |
| 5096 | Adenocarcinoma of large intestine | LOC100287411 | 0.000004 | -2.686546 |  |
| 5097 | Adenocarcinoma of large intestine | PPP2R3A      | 0.000044 | -2.652001 |  |
| 5098 | Adenocarcinoma of large intestine | FLJ36848     | 0.00035  | -2.648614 |  |

|      |                                   |              |          |           |  |
|------|-----------------------------------|--------------|----------|-----------|--|
| 5099 | Adenocarcinoma of large intestine | FAM55A       | 0.000402 | -2.645677 |  |
| 5100 | Adenocarcinoma of large intestine | SELENBP1     | 0.000389 | -2.638804 |  |
| 5101 | Adenocarcinoma of large intestine | PTPRZ1       | 0.000041 | -2.633858 |  |
| 5102 | Adenocarcinoma of large intestine | SMOX         | 0        | -2.620293 |  |
| 5103 | Adenocarcinoma of large intestine | FZD9         | 0.000734 | -2.619644 |  |
| 5104 | Adenocarcinoma of large intestine | SGK2         | 0.00017  | -2.610315 |  |
| 5105 | Adenocarcinoma of large intestine | CLU          | 0.000096 | -2.607711 |  |
| 5106 | Adenocarcinoma of large intestine | F13A1        | 0.000026 | -2.603464 |  |
| 5107 | Adenocarcinoma of large intestine | CORO2B       | 0.000078 | -2.602121 |  |
| 5108 | Adenocarcinoma of large intestine | CD36         | 0.000013 | -2.571099 |  |
| 5109 | Adenocarcinoma of large intestine | WDR78        | 0.00079  | -2.565834 |  |
| 5110 | Adenocarcinoma of large intestine | S100A11      | 0        | -2.556185 |  |
| 5111 | Adenocarcinoma of large intestine | FXYD5        | 0        | -2.548632 |  |
| 5112 | Adenocarcinoma of large intestine | MUM1L1       | 0.000125 | -2.545621 |  |
| 5113 | Adenocarcinoma of large intestine | CDC14A       | 0.000013 | -2.52973  |  |
| 5114 | Adenocarcinoma of large intestine | DCAF8        | 0.000282 | -2.488817 |  |
| 5115 | Adenocarcinoma of large intestine | P2RY1        | 0.000279 | -2.484963 |  |
| 5116 | Adenocarcinoma of large intestine | ACVR1C       | 0.000001 | -2.484118 |  |
| 5117 | Adenocarcinoma of large intestine | FABP4        | 0.000429 | -2.467217 |  |
| 5118 | Adenocarcinoma of large intestine | BMP2K        | 0.000903 | -2.464008 |  |
| 5119 | Adenocarcinoma of large intestine | PPID         | 0.000025 | -2.462194 |  |
| 5120 | Adenocarcinoma of large intestine | AVIL         | 0.000001 | -2.461099 |  |
| 5121 | Adenocarcinoma of large intestine | PDE4DIP      | 0.000528 | -2.449105 |  |
| 5122 | Adenocarcinoma of large intestine | C1orf161     | 0.000928 | -2.442114 |  |
| 5123 | Adenocarcinoma of large intestine | LOC219347    | 0.000163 | -2.439474 |  |
| 5124 | Adenocarcinoma of large intestine | PRIMA1       | 0.000018 | -2.435454 |  |
| 5125 | Adenocarcinoma of large intestine | LANCL3       | 0.000299 | -2.429492 |  |
| 5126 | Adenocarcinoma of large intestine | CDK3         | 0.000077 | -2.425672 |  |
| 5127 | Adenocarcinoma of large intestine | SLC36A1      | 0.000061 | -2.421944 |  |
| 5128 | Adenocarcinoma of large intestine | CNNM2        | 0.000885 | -2.413334 |  |
| 5129 | Adenocarcinoma of large intestine | GPR44        | 0.000131 | -2.40323  |  |
| 5130 | Adenocarcinoma of large intestine | GATM         | 0.000842 | -2.391762 |  |
| 5131 | Adenocarcinoma of large intestine | LOC400573    | 0.000263 | -2.3904   |  |
| 5132 | Adenocarcinoma of large intestine | PLIN1        | 0.000566 | -2.387082 |  |
| 5133 | Adenocarcinoma of large intestine | SLC22A5      | 0.000006 | -2.383758 |  |
| 5134 | Adenocarcinoma of large intestine | AHCYL2       | 0.000628 | -2.379079 |  |
| 5135 | Adenocarcinoma of large intestine | NAAA         | 0.000629 | -2.377968 |  |
| 5136 | Adenocarcinoma of large intestine | TEAD4        | 0        | -2.373796 |  |
| 5137 | Adenocarcinoma of large intestine | C20orf20     | 0        | -2.373628 |  |
| 5138 | Adenocarcinoma of large intestine | MTHFD1L      | 0        | -2.368066 |  |
| 5139 | Adenocarcinoma of large intestine | ZFP3         | 0.000004 | -2.365486 |  |
| 5140 | Adenocarcinoma of large intestine | LOC100292909 | 0.000445 | -2.365269 |  |
| 5141 | Adenocarcinoma of large intestine | SATB2        | 0.000228 | -2.342286 |  |
| 5142 | Adenocarcinoma of large intestine | KLF8         | 0.000744 | -2.298547 |  |
| 5143 | Adenocarcinoma of large intestine | PSMG4        | 0.000001 | -2.294456 |  |
| 5144 | Adenocarcinoma of large intestine | AGPAT9       | 0.000539 | -2.293253 |  |
| 5145 | Adenocarcinoma of large intestine | LRMP         | 0.00005  | -2.283572 |  |
| 5146 | Adenocarcinoma of large intestine | BCL2L15      | 0.000028 | -2.268541 |  |
| 5147 | Adenocarcinoma of large intestine | MAPT         | 0.000094 | -2.264895 |  |
| 5148 | Adenocarcinoma of large intestine | MOCS1        | 0.000648 | -2.261519 |  |

|      |                                   |           |          |           |  |
|------|-----------------------------------|-----------|----------|-----------|--|
| 5149 | Adenocarcinoma of large intestine | RHBDF2    | 0        | -2.25911  |  |
| 5150 | Adenocarcinoma of large intestine | SLC9A2    | 0.00037  | -2.258692 |  |
| 5151 | Adenocarcinoma of large intestine | ATP10A    | 0.000191 | -2.232913 |  |
| 5152 | Adenocarcinoma of large intestine | MMP28     | 0.000395 | -2.225691 |  |
| 5153 | Adenocarcinoma of large intestine | WISP1     | 0        | -2.212239 |  |
| 5154 | Adenocarcinoma of large intestine | DAPK2     | 0.000157 | -2.196591 |  |
| 5155 | Adenocarcinoma of large intestine | MIER3     | 0.000032 | -2.171328 |  |
| 5156 | Adenocarcinoma of large intestine | SULT1A1   | 0.000014 | -2.150609 |  |
| 5157 | Adenocarcinoma of large intestine | OSBPL1A   | 0.000137 | -2.149565 |  |
| 5158 | Adenocarcinoma of large intestine | ATP5S     | 0.000093 | -2.147486 |  |
| 5159 | Adenocarcinoma of large intestine | ATOH8     | 0.000883 | -2.140852 |  |
| 5160 | Adenocarcinoma of large intestine | RIPK2     | 0        | -2.137108 |  |
| 5161 | Adenocarcinoma of large intestine | NPY       | 0.000112 | -2.125373 |  |
| 5162 | Adenocarcinoma of large intestine | GOLGA2B   | 0.000001 | -2.124954 |  |
| 5163 | Adenocarcinoma of large intestine | PPARGC1A  | 0.000582 | -2.097672 |  |
| 5164 | Adenocarcinoma of large intestine | BCL2      | 0.000006 | -2.095351 |  |
| 5165 | Adenocarcinoma of large intestine | FLJ44606  | 0.000687 | -2.08379  |  |
| 5166 | Adenocarcinoma of large intestine | FAM47E    | 0.00003  | -2.074512 |  |
| 5167 | Adenocarcinoma of large intestine | DENND2A   | 0.000268 | -2.067171 |  |
| 5168 | Adenocarcinoma of large intestine | SULT1A2   | 0.000112 | -2.054603 |  |
| 5169 | Adenocarcinoma of large intestine | LRRC3B    | 0.000693 | -2.049939 |  |
| 5170 | Adenocarcinoma of large intestine | ACSF2     | 0.000282 | -2.048502 |  |
| 5171 | Adenocarcinoma of large intestine | TRPM4     | 0.000312 | -2.029588 |  |
| 5172 | Adenocarcinoma of large intestine | FJX1      | 0        | -2.028496 |  |
| 5173 | Adenocarcinoma of large intestine | ZNF575    | 0.000162 | -2.028027 |  |
| 5174 | Adenocarcinoma of large intestine | DACT2     | 0.000588 | -2.023093 |  |
| 5175 | Adenocarcinoma of large intestine | AIFM3     | 0.000415 | -2.023087 |  |
| 5176 | Adenocarcinoma of large intestine | SSBP2     | 0.000699 | -2.016057 |  |
| 5177 | Adenocarcinoma of large intestine | MTHFD2    | 0        | -2.009216 |  |
| 5178 | Adenocarcinoma of large intestine | STAG3     | 0.000114 | -2.003641 |  |
| 5179 | Adenocarcinoma of large intestine | ROPN1     | 0.000748 | -2.002696 |  |
| 5180 | Adenocarcinoma of large intestine | CCBP2     | 0        | 2.027799  |  |
| 5181 | Adenocarcinoma of large intestine | ZZEF1     | 0        | 2.045019  |  |
| 5182 | Adenocarcinoma of large intestine | CITED2    | 0        | 2.074953  |  |
| 5183 | Adenocarcinoma of large intestine | WISP2     | 0        | 2.08814   |  |
| 5184 | Adenocarcinoma of large intestine | GLTP      | 0        | 2.101629  |  |
| 5185 | Adenocarcinoma of large intestine | PLCD3     | 0        | 2.104867  |  |
| 5186 | Adenocarcinoma of large intestine | PPARGC1B  | 0        | 2.109637  |  |
| 5187 | Adenocarcinoma of large intestine | TP53INP2  | 0        | 2.11798   |  |
| 5188 | Adenocarcinoma of large intestine | AFF3      | 0        | 2.168501  |  |
| 5189 | Adenocarcinoma of large intestine | TNFRSF13B | 0        | 2.195702  |  |
| 5190 | Adenocarcinoma of large intestine | CPT2      | 0        | 2.196555  |  |
| 5191 | Adenocarcinoma of large intestine | DHRS9     | 0        | 2.198375  |  |
| 5192 | Adenocarcinoma of large intestine | BRP44L    | 0        | 2.200729  |  |
| 5193 | Adenocarcinoma of large intestine | ETFDH     | 0        | 2.226034  |  |
| 5194 | Adenocarcinoma of large intestine | RPIB9     | 0        | 2.251726  |  |
| 5195 | Adenocarcinoma of large intestine | TMEFF2    | 0        | 2.267269  |  |
| 5196 | Adenocarcinoma of large intestine | KIF5C     | 0        | 2.283957  |  |
| 5197 | Adenocarcinoma of large intestine | AKAP7     | 0        | 2.2988    |  |
| 5198 | Adenocarcinoma of large intestine | NKX2-3    | 0        | 2.302686  |  |

|      |                                   |           |   |          |  |
|------|-----------------------------------|-----------|---|----------|--|
| 5199 | Adenocarcinoma of large intestine | LGI1      | 0 | 2.314818 |  |
| 5200 | Adenocarcinoma of large intestine | PMP2      | 0 | 2.341572 |  |
| 5201 | Adenocarcinoma of large intestine | UGP2      | 0 | 2.354849 |  |
| 5202 | Adenocarcinoma of large intestine | GNA11     | 0 | 2.359015 |  |
| 5203 | Adenocarcinoma of large intestine | TCF21     | 0 | 2.391464 |  |
| 5204 | Adenocarcinoma of large intestine | NEDD4L    | 0 | 2.466577 |  |
| 5205 | Adenocarcinoma of large intestine | PPAP2A    | 0 | 2.488416 |  |
| 5206 | Adenocarcinoma of large intestine | HHLA2     | 0 | 2.489899 |  |
| 5207 | Adenocarcinoma of large intestine | TMEM100   | 0 | 2.527418 |  |
| 5208 | Adenocarcinoma of large intestine | LOC643940 | 0 | 2.564427 |  |
| 5209 | Adenocarcinoma of large intestine | FUCA1     | 0 | 2.564942 |  |
| 5210 | Adenocarcinoma of large intestine | RDH5      | 0 | 2.567677 |  |
| 5211 | Adenocarcinoma of large intestine | RetSat    | 0 | 2.572066 |  |
| 5212 | Adenocarcinoma of large intestine | MGC14376  | 0 | 2.624985 |  |
| 5213 | Adenocarcinoma of large intestine | ASAH1     | 0 | 2.687594 |  |
| 5214 | Adenocarcinoma of large intestine | PHLP1     | 0 | 2.688005 |  |
| 5215 | Adenocarcinoma of large intestine | PLCD1     | 0 | 2.749102 |  |
| 5216 | Adenocarcinoma of large intestine | EPB41L3   | 0 | 2.762123 |  |
| 5217 | Adenocarcinoma of large intestine | ENTPD5    | 0 | 2.764317 |  |
| 5218 | Adenocarcinoma of large intestine | LOC285016 | 0 | 2.803106 |  |
| 5219 | Adenocarcinoma of large intestine | EDG2      | 0 | 2.8128   |  |
| 5220 | Adenocarcinoma of large intestine | KRT24     | 0 | 2.892109 |  |
| 5221 | Adenocarcinoma of large intestine | GREM2     | 0 | 3.005481 |  |
| 5222 | Adenocarcinoma of large intestine | OGN       | 0 | 3.035103 |  |
| 5223 | Adenocarcinoma of large intestine | HMFN0839  | 0 | 3.055462 |  |
| 5224 | Adenocarcinoma of large intestine | KCNIP4    | 0 | 3.090417 |  |
| 5225 | Adenocarcinoma of large intestine | CNTFR     | 0 | 3.157038 |  |
| 5226 | Adenocarcinoma of large intestine | GPM6B     | 0 | 3.220923 |  |
| 5227 | Adenocarcinoma of large intestine | MAL       | 0 | 3.354032 |  |
| 5228 | Adenocarcinoma of large intestine | OTOP2     | 0 | 3.429898 |  |
| 5229 | Adenocarcinoma of large intestine | LDHD      | 0 | 3.492451 |  |
| 5230 | Adenocarcinoma of large intestine | FAM107A   | 0 | 3.744748 |  |
| 5231 | Adenocarcinoma of large intestine | EDN3      | 0 | 3.87703  |  |
| 5232 | Adenocarcinoma of large intestine | MATN2     | 0 | 3.91557  |  |
| 5233 | Adenocarcinoma of large intestine | LOC441282 | 0 | 4.058839 |  |
| 5234 | Adenocarcinoma of large intestine | NR3C2     | 0 | 4.11659  |  |
| 5235 | Adenocarcinoma of large intestine | KIAA0828  | 0 | 4.161943 |  |
| 5236 | Adenocarcinoma of large intestine | PRPH      | 0 | 4.228059 |  |
| 5237 | Adenocarcinoma of large intestine | PDK4      | 0 | 4.232559 |  |
| 5238 | Adenocarcinoma of large intestine | ADH1B     | 0 | 4.346492 |  |
| 5239 | Adenocarcinoma of large intestine | CA7       | 0 | 4.360658 |  |
| 5240 | Adenocarcinoma of large intestine | SCIN      | 0 | 4.434475 |  |
| 5241 | Adenocarcinoma of large intestine | GPT       | 0 | 4.443061 |  |
| 5242 | Adenocarcinoma of large intestine | PLAC9     | 0 | 4.463959 |  |
| 5243 | Adenocarcinoma of large intestine | LOC340843 | 0 | 4.503637 |  |
| 5244 | Adenocarcinoma of large intestine | VIP       | 0 | 4.583618 |  |
| 5245 | Adenocarcinoma of large intestine | MGC4172   | 0 | 4.678043 |  |
| 5246 | Adenocarcinoma of large intestine | SRPX      | 0 | 4.822471 |  |
| 5247 | Adenocarcinoma of large intestine | KLF4      | 0 | 4.841207 |  |
| 5248 | Adenocarcinoma of large intestine | UGT1A10   | 0 | 4.847321 |  |

|      |                                   |           |          |            |  |
|------|-----------------------------------|-----------|----------|------------|--|
| 5249 | Adenocarcinoma of large intestine | FLJ21511  | 0        | 4.982366   |  |
| 5250 | Adenocarcinoma of large intestine | PCOLCE2   | 0        | 5.114989   |  |
| 5251 | Adenocarcinoma of large intestine | VMD2L2    | 0        | 5.32281    |  |
| 5252 | Adenocarcinoma of large intestine | HPGD      | 0        | 5.351308   |  |
| 5253 | Adenocarcinoma of large intestine | SCNN1B    | 0        | 5.373861   |  |
| 5254 | Adenocarcinoma of large intestine | CLEC3B    | 0        | 5.526861   |  |
| 5255 | Adenocarcinoma of large intestine | PI16      | 0        | 5.715154   |  |
| 5256 | Adenocarcinoma of large intestine | VMD2L1    | 0        | 5.755075   |  |
| 5257 | Adenocarcinoma of large intestine | HSD11B2   | 0        | 6.08248    |  |
| 5258 | Adenocarcinoma of large intestine | MGC13057  | 0        | 6.316289   |  |
| 5259 | Adenocarcinoma of large intestine | PYY       | 0        | 7.20626    |  |
| 5260 | Adenocarcinoma of large intestine | CFD       | 0        | 7.915842   |  |
| 5261 | Adenocarcinoma of large intestine | MT1M      | 0        | 8.12885    |  |
| 5262 | Adenocarcinoma of large intestine | LOC63928  | 0        | 8.915585   |  |
| 5263 | Adenocarcinoma of large intestine | TMIGD     | 0        | 10.791315  |  |
| 5264 | Adenocarcinoma of large intestine | MS4A12    | 0        | 17.955812  |  |
| 5265 | Adenocarcinoma of large intestine | CA4       | 0        | 18.548553  |  |
| 5266 | Adenocarcinoma of large intestine | CLCA4     | 0        | 31.629654  |  |
| 5267 | Adenocarcinoma of large intestine | CA1       | 0        | 36.110772  |  |
| 5268 | Adenocarcinoma, Mucinous          | LY6G6D    | 0        | -4.234524  |  |
| 5269 | Adenocarcinoma, Mucinous          | CELP      | 0.000244 | -3.495462  |  |
| 5270 | Adenocarcinoma, Mucinous          | DNASE1    | 0.001751 | -3.430109  |  |
| 5271 | Adenocarcinoma, Mucinous          | ASCL2     | 0.000001 | -3.062706  |  |
| 5272 | Adenocarcinoma, Mucinous          | ACSL6     | 0.000001 | -2.83988   |  |
| 5273 | Adenocarcinoma, Mucinous          | CAB39L    | 0.000001 | -2.735909  |  |
| 5274 | Adenocarcinoma, Mucinous          | MAP7D2    | 0.000006 | -2.688518  |  |
| 5275 | Adenocarcinoma, Mucinous          | GRM8      | 0.000002 | -2.68718   |  |
| 5276 | Adenocarcinoma, Mucinous          | KRT23     | 0.000539 | -2.685039  |  |
| 5277 | Adenocarcinoma, Mucinous          | LOC283859 | 0.000012 | -2.618039  |  |
| 5278 | Adenocarcinoma, Mucinous          | SLC13A3   | 0.00001  | -2.557739  |  |
| 5279 | Adenocarcinoma, Mucinous          | EREG      | 0        | -2.553703  |  |
| 5280 | Adenocarcinoma, Mucinous          | GPR143    | 0.000005 | -2.545016  |  |
| 5281 | Adenocarcinoma, Mucinous          | PIPOX     | 0.001914 | -2.285877  |  |
| 5282 | Adenocarcinoma, Mucinous          | ABAT      | 0.000517 | -2.258946  |  |
| 5283 | Adenocarcinoma, Mucinous          | GNG4      | 0.00147  | -2.257787  |  |
| 5284 | Adenocarcinoma, Mucinous          | ACE2      | 0.000001 | -2.234792  |  |
| 5285 | Adenocarcinoma, Mucinous          | SLC1A7    | 0.000132 | -2.20973   |  |
| 5286 | Adenocarcinoma, Mucinous          | C13orf18  | 0        | -2.197989  |  |
| 5287 | Adenocarcinoma, Mucinous          | PLA2G12B  | 0.000003 | -2.136562  |  |
| 5288 | Adenocarcinoma, Mucinous          | REEP1     | 0        | -2.120391  |  |
| 5289 | Adenocarcinoma, Mucinous          | RNF43     | 0        | -2.095993  |  |
| 5290 | Adenocarcinoma, Mucinous          | XPNPEP2   | 0.001566 | -2.073633  |  |
| 5291 | Adenocarcinoma, Mucinous          | FGGY      | 0.000002 | -2.066334  |  |
| 5292 | Adenocarcinoma, Mucinous          | EIF2S2    | 0.000003 | -2.022957  |  |
| 5293 | Adenocarcinoma, Mucinous          | TFF1      | 0.000664 | 2.595315   |  |
| 5294 | Adenocarcinoma, Mucinous          | REG4      | 0.000281 | 3.555368   |  |
| 5295 | adenoma                           | SPINK5    | 0.000031 | -32.239686 |  |
| 5296 | adenoma                           | ACHE      | 0.000024 | -23.943237 |  |
| 5297 | adenoma                           | SLC25A34  | 0.000046 | -21.203959 |  |
| 5298 | adenoma                           | DHRS9     | 0.000068 | -17.872567 |  |

|      |         |           |          |            |  |
|------|---------|-----------|----------|------------|--|
| 5299 | adenoma | OSTBETA   | 0.000025 | -17.297428 |  |
| 5300 | adenoma | THOC4     | 0.002192 | -15.850692 |  |
| 5301 | adenoma | DPEP2     | 0.000041 | -15.654621 |  |
| 5302 | adenoma | OLFM1     | 0        | -15.232331 |  |
| 5303 | adenoma | STMN2     | 0.000003 | -14.933347 |  |
| 5304 | adenoma | BTNL8     | 0.000017 | -14.197677 |  |
| 5305 | adenoma | SLC15A1   | 0.000019 | -13.109778 |  |
| 5306 | adenoma | SFSWAP    | 0.000385 | -12.019069 |  |
| 5307 | adenoma | CYBRD1    | 0.000011 | -11.498188 |  |
| 5308 | adenoma | PYY       | 0        | -11.401911 |  |
| 5309 | adenoma | CRYBA2    | 0.000001 | -11.209007 |  |
| 5310 | adenoma | C11orf86  | 0.000005 | -11.074642 |  |
| 5311 | adenoma | ABCG2     | 0.000001 | -10.987225 |  |
| 5312 | adenoma | LGALS2    | 0.000022 | -10.968017 |  |
| 5313 | adenoma | FBXO16    | 0.002042 | -10.302455 |  |
| 5314 | adenoma | APBB1     | 0.000007 | -9.770749  |  |
| 5315 | adenoma | SAA1      | 0.00016  | -9.645666  |  |
| 5316 | adenoma | IQGAP3    | 0.001662 | -9.509695  |  |
| 5317 | adenoma | DNAJC3    | 0.001686 | -9.227685  |  |
| 5318 | adenoma | FOXM1     | 0.001886 | -8.896249  |  |
| 5319 | adenoma | TAF13     | 0.000076 | -8.867731  |  |
| 5320 | adenoma | KIAA0090  | 0.000315 | -8.86213   |  |
| 5321 | adenoma | CDKN2B-AS | 0.000002 | -8.855571  |  |
| 5322 | adenoma | NME3      | 0.000161 | -8.793324  |  |
| 5323 | adenoma | MAGEA3    | 0.000022 | -8.032836  |  |
| 5324 | adenoma | CDA       | 0.000052 | -7.974413  |  |
| 5325 | adenoma | MAGEA6    | 0.00001  | -7.748368  |  |
| 5326 | adenoma | CCDC102B  | 0.000001 | -7.700813  |  |
| 5327 | adenoma | YKT6      | 0.000744 | -7.467236  |  |
| 5328 | adenoma | SDCBP2    | 0.000007 | -7.428168  |  |
| 5329 | adenoma | ZNF568    | 0.000024 | -7.327563  |  |
| 5330 | adenoma | PLEKHG2   | 0.000054 | -7.265051  |  |
| 5331 | adenoma | HSD17B2   | 0.000023 | -7.156495  |  |
| 5332 | adenoma | FEV       | 0.000002 | -7.139037  |  |
| 5333 | adenoma | FLJ35700  | 0.000058 | -7.106864  |  |
| 5334 | adenoma | LMNB2     | 0.001886 | -7.090754  |  |
| 5335 | adenoma | TPH1      | 0.000003 | -7.005897  |  |
| 5336 | adenoma | PKNOX2    | 0.000046 | -6.995376  |  |
| 5337 | adenoma | RAB9B     | 0.000039 | -6.901206  |  |
| 5338 | adenoma | ENPP6     | 0.000082 | -6.893884  |  |
| 5339 | adenoma | CDCA8     | 0.001018 | -6.831727  |  |
| 5340 | adenoma | CHP2      | 0        | -6.7631    |  |
| 5341 | adenoma | LOC646627 | 0        | -6.74501   |  |
| 5342 | adenoma | DGCR8     | 0.000704 | -6.718962  |  |
| 5343 | adenoma | BEST4     | 0.000005 | -6.576351  |  |
| 5344 | adenoma | SYNE1     | 0.000014 | -6.563564  |  |
| 5345 | adenoma | GPR109B   | 0        | -6.520218  |  |
| 5346 | adenoma | CELA3A    | 0.000054 | -6.497474  |  |
| 5347 | adenoma | CLN6      | 0.001478 | -6.49325   |  |
| 5348 | adenoma | HRCT1     | 0.000044 | -6.487225  |  |

|      |         |          |          |           |  |
|------|---------|----------|----------|-----------|--|
| 5349 | adenoma | TRIO     | 0.000934 | -6.447365 |  |
| 5350 | adenoma | PKP4     | 0.000111 | -6.417608 |  |
| 5351 | adenoma | SLC26A2  | 0        | -6.351358 |  |
| 5352 | adenoma | CHGB     | 0.000032 | -6.347379 |  |
| 5353 | adenoma | SLCO2B1  | 0.000011 | -6.318094 |  |
| 5354 | adenoma | ACVR1B   | 0.00116  | -6.25544  |  |
| 5355 | adenoma | PRKAA2   | 0.000019 | -6.127948 |  |
| 5356 | adenoma | GPAT2    | 0.000035 | -6.11638  |  |
| 5357 | adenoma | CA7      | 0        | -6.05505  |  |
| 5358 | adenoma | DSEL     | 0.000007 | -5.961644 |  |
| 5359 | adenoma | CELA3B   | 0.000055 | -5.881904 |  |
| 5360 | adenoma | CTSW     | 0.00006  | -5.831313 |  |
| 5361 | adenoma | SLC35E1  | 0.00013  | -5.757664 |  |
| 5362 | adenoma | GNB1     | 0.000526 | -5.737384 |  |
| 5363 | adenoma | SPTLC3   | 0        | -5.719148 |  |
| 5364 | adenoma | SOSTDC1  | 0.000007 | -5.715365 |  |
| 5365 | adenoma | CLECL1   | 0.000024 | -5.673399 |  |
| 5366 | adenoma | POR      | 0.000845 | -5.635963 |  |
| 5367 | adenoma | FAM126B  | 0.001247 | -5.576524 |  |
| 5368 | adenoma | CBX5     | 0.001842 | -5.542697 |  |
| 5369 | adenoma | C17orf70 | 0.00013  | -5.532599 |  |
| 5370 | adenoma | HTR4     | 0.000024 | -5.522219 |  |
| 5371 | adenoma | E2F1     | 0.001821 | -5.423845 |  |
| 5372 | adenoma | IL16     | 0.000032 | -5.408401 |  |
| 5373 | adenoma | B2M      | 0.001522 | -5.406274 |  |
| 5374 | adenoma | SLC6A13  | 0.000054 | -5.392697 |  |
| 5375 | adenoma | MESP2    | 0.000034 | -5.381215 |  |
| 5376 | adenoma | FAM150B  | 0.000003 | -5.356415 |  |
| 5377 | adenoma | CHAF1A   | 0.000672 | -5.355374 |  |
| 5378 | adenoma | FIGN     | 0.000032 | -5.328371 |  |
| 5379 | adenoma | DPP10    | 0        | -5.255341 |  |
| 5380 | adenoma | LRRK2    | 0        | -5.211608 |  |
| 5381 | adenoma | ABI3BP   | 0        | -5.15203  |  |
| 5382 | adenoma | GPR153   | 0.000831 | -5.134941 |  |
| 5383 | adenoma | LRRN2    | 0.000004 | -5.114688 |  |
| 5384 | adenoma | GPRC5B   | 0.000054 | -5.056463 |  |
| 5385 | adenoma | QSER1    | 0.001662 | -5.042886 |  |
| 5386 | adenoma | CDH19    | 0        | -5.022701 |  |
| 5387 | adenoma | CAMKK2   | 0.000251 | -5.000891 |  |
| 5388 | adenoma | POLDIP2  | 0.000656 | -4.984634 |  |
| 5389 | adenoma | PPTC7    | 0.002137 | -4.909444 |  |
| 5390 | adenoma | KIAA2022 | 0.000001 | -4.891469 |  |
| 5391 | adenoma | TMEM72   | 0.000001 | -4.884725 |  |
| 5392 | adenoma | INSM1    | 0        | -4.88269  |  |
| 5393 | adenoma | PRRC1    | 0.000109 | -4.870486 |  |
| 5394 | adenoma | CXCL5    | 0        | -4.838213 |  |
| 5395 | adenoma | GZMK     | 0.000021 | -4.771295 |  |
| 5396 | adenoma | GUCA1B   | 0        | -4.730904 |  |
| 5397 | adenoma | SECTM1   | 0.000043 | -4.703083 |  |
| 5398 | adenoma | CLIP3    | 0.000019 | -4.692329 |  |

|      |         |              |          |           |  |
|------|---------|--------------|----------|-----------|--|
| 5399 | adenoma | HHLA2        | 0.000005 | -4.674398 |  |
| 5400 | adenoma | WSCD1        | 0        | -4.610428 |  |
| 5401 | adenoma | SERPINE1     | 0        | -4.593549 |  |
| 5402 | adenoma | RPS6KB2      | 0.000132 | -4.579522 |  |
| 5403 | adenoma | ILF3         | 0.000279 | -4.568197 |  |
| 5404 | adenoma | DPP4         | 0.000066 | -4.500848 |  |
| 5405 | adenoma | PCDH9        | 0        | -4.498007 |  |
| 5406 | adenoma | MYOT         | 0.000002 | -4.483537 |  |
| 5407 | adenoma | FLJ36848     | 0.000032 | -4.481406 |  |
| 5408 | adenoma | SNX8         | 0.000854 | -4.462603 |  |
| 5409 | adenoma | TUSC3        | 0.000001 | -4.451097 |  |
| 5410 | adenoma | COX15        | 0.000588 | -4.445678 |  |
| 5411 | adenoma | ARF5         | 0.00013  | -4.444786 |  |
| 5412 | adenoma | CD1D         | 0.000006 | -4.435071 |  |
| 5413 | adenoma | FAM132A      | 0.000022 | -4.373596 |  |
| 5414 | adenoma | ATRIP        | 0.000315 | -4.366136 |  |
| 5415 | adenoma | LOC647979    | 0.001018 | -4.328323 |  |
| 5416 | adenoma | PAK6         | 0.000745 | -4.323249 |  |
| 5417 | adenoma | HMOX1        | 0.000006 | -4.31922  |  |
| 5418 | adenoma | SPIB         | 0        | -4.317744 |  |
| 5419 | adenoma | HSPA4        | 0.001417 | -4.309139 |  |
| 5420 | adenoma | LOC399959    | 0.000022 | -4.287609 |  |
| 5421 | adenoma | RTN1         | 0        | -4.266108 |  |
| 5422 | adenoma | PASK         | 0.00077  | -4.240231 |  |
| 5423 | adenoma | LOC100507192 | 0.000082 | -4.220012 |  |
| 5424 | adenoma | PPP4C        | 0.00187  | -4.187227 |  |
| 5425 | adenoma | AQP9         | 0.000002 | -4.184974 |  |
| 5426 | adenoma | HIST1H1C     | 0.000005 | -4.183722 |  |
| 5427 | adenoma | H19          | 0.000013 | -4.174771 |  |
| 5428 | adenoma | GPM6B        | 0        | -4.161942 |  |
| 5429 | adenoma | ILVBL        | 0.00013  | -4.144674 |  |
| 5430 | adenoma | CCL2         | 0.000015 | -4.121636 |  |
| 5431 | adenoma | PLP1         | 0.000004 | -4.115264 |  |
| 5432 | adenoma | RGS2         | 0.000028 | -4.115168 |  |
| 5433 | adenoma | WDR46        | 0.001018 | -4.111929 |  |
| 5434 | adenoma | SDC3         | 0.000082 | -4.088098 |  |
| 5435 | adenoma | LAMA2        | 0        | -4.08393  |  |
| 5436 | adenoma | LBR          | 0.000241 | -4.078122 |  |
| 5437 | adenoma | PTPLAD1      | 0.001886 | -4.066034 |  |
| 5438 | adenoma | MGP          | 0        | -4.058043 |  |
| 5439 | adenoma | NLGN4X       | 0        | -4.057908 |  |
| 5440 | adenoma | SLC25A1      | 0.001005 | -4.035714 |  |
| 5441 | adenoma | ATP6V0B      | 0.000159 | -3.983904 |  |
| 5442 | adenoma | ANP32A       | 0.00038  | -3.971833 |  |
| 5443 | adenoma | DPT          | 0        | -3.964112 |  |
| 5444 | adenoma | PCDH19       | 0.00002  | -3.957706 |  |
| 5445 | adenoma | DPYD         | 0        | -3.957465 |  |
| 5446 | adenoma | MAGEA2       | 0.000008 | -3.948847 |  |
| 5447 | adenoma | LOC25845     | 0.000002 | -3.940293 |  |
| 5448 | adenoma | SCN7A        | 0.000001 | -3.937932 |  |



|      |         |           |          |           |  |
|------|---------|-----------|----------|-----------|--|
| 5449 | adenoma | MEP1A     | 0        | -3.928076 |  |
| 5450 | adenoma | RPS27A    | 0.000251 | -3.905075 |  |
| 5451 | adenoma | VIL1      | 0.001542 | -3.894469 |  |
| 5452 | adenoma | RBP5      | 0.00001  | -3.891229 |  |
| 5453 | adenoma | H2AFX     | 0.002042 | -3.877215 |  |
| 5454 | adenoma | FGF9      | 0        | -3.874986 |  |
| 5455 | adenoma | TMEM222   | 0.000995 | -3.874331 |  |
| 5456 | adenoma | RAB14     | 0.001286 | -3.872952 |  |
| 5457 | adenoma | GNG11     | 0.000054 | -3.848307 |  |
| 5458 | adenoma | KCTD5     | 0.001408 | -3.841062 |  |
| 5459 | adenoma | IQGAP1    | 0.001467 | -3.831449 |  |
| 5460 | adenoma | UHMK1     | 0.000082 | -3.826934 |  |
| 5461 | adenoma | CGN       | 0.001018 | -3.815548 |  |
| 5462 | adenoma | KIF18B    | 0.00115  | -3.804853 |  |
| 5463 | adenoma | PRR5      | 0.000536 | -3.798945 |  |
| 5464 | adenoma | NHP2L1    | 0.00019  | -3.791524 |  |
| 5465 | adenoma | HDGFRP3   | 0.00009  | -3.781041 |  |
| 5466 | adenoma | SCGN      | 0.000009 | -3.779157 |  |
| 5467 | adenoma | MAGEA12   | 0.000002 | -3.774247 |  |
| 5468 | adenoma | NRXN1     | 0.000002 | -3.768761 |  |
| 5469 | adenoma | FAM38A    | 0.000799 | -3.762828 |  |
| 5470 | adenoma | ACLY      | 0.001475 | -3.75369  |  |
| 5471 | adenoma | SEMA3E    | 0.000001 | -3.749221 |  |
| 5472 | adenoma | ARHGAP20  | 0        | -3.749217 |  |
| 5473 | adenoma | SET       | 0.000251 | -3.748505 |  |
| 5474 | adenoma | GATAD2A   | 0.000082 | -3.724059 |  |
| 5475 | adenoma | LY9       | 0.000072 | -3.719374 |  |
| 5476 | adenoma | TIPRL     | 0.00148  | -3.704312 |  |
| 5477 | adenoma | SOD2      | 0        | -3.701291 |  |
| 5478 | adenoma | BCHE      | 0.000066 | -3.695978 |  |
| 5479 | adenoma | ZNF75A    | 0        | -3.693634 |  |
| 5480 | adenoma | RHOF      | 0.000004 | -3.660494 |  |
| 5481 | adenoma | ZNF124    | 0.00115  | -3.65106  |  |
| 5482 | adenoma | NEU4      | 0.000076 | -3.65104  |  |
| 5483 | adenoma | GUCY1A3   | 0.000002 | -3.647659 |  |
| 5484 | adenoma | HMCN1     | 0.000082 | -3.643733 |  |
| 5485 | adenoma | ATAD3A    | 0.000419 | -3.641075 |  |
| 5486 | adenoma | COMP      | 0.000063 | -3.625885 |  |
| 5487 | adenoma | LOC646701 | 0.000082 | -3.621953 |  |
| 5488 | adenoma | TPK1      | 0.000016 | -3.612082 |  |
| 5489 | adenoma | BAG5      | 0.002107 | -3.61189  |  |
| 5490 | adenoma | PHPT1     | 0.000745 | -3.596465 |  |
| 5491 | adenoma | INTS6     | 0.000536 | -3.583784 |  |
| 5492 | adenoma | C2orf40   | 0.000056 | -3.580672 |  |
| 5493 | adenoma | EYA2      | 0        | -3.577915 |  |
| 5494 | adenoma | KIF16B    | 0.000001 | -3.576707 |  |
| 5495 | adenoma | IL1R2     | 0        | -3.568313 |  |
| 5496 | adenoma | NEURL3    | 0.000006 | -3.521461 |  |
| 5497 | adenoma | LPHN2     | 0        | -3.519243 |  |
| 5498 | adenoma | VIPR1     | 0        | -3.513648 |  |

|      |         |           |          |           |  |
|------|---------|-----------|----------|-----------|--|
| 5499 | adenoma | DDOST     | 0.000387 | -3.511996 |  |
| 5500 | adenoma | APLP2     | 0.000744 | -3.51052  |  |
| 5501 | adenoma | EIF1AX    | 0.001622 | -3.499155 |  |
| 5502 | adenoma | SDC1      | 0.000536 | -3.462107 |  |
| 5503 | adenoma | IL1R1     | 0.000025 | -3.461987 |  |
| 5504 | adenoma | CLEC10A   | 0.000005 | -3.459407 |  |
| 5505 | adenoma | CPNE3     | 0.000419 | -3.458522 |  |
| 5506 | adenoma | GAS1      | 0.000002 | -3.452579 |  |
| 5507 | adenoma | TFAM      | 0.000283 | -3.448504 |  |
| 5508 | adenoma | MRPS5     | 0.001616 | -3.438726 |  |
| 5509 | adenoma | ESR1      | 0.000054 | -3.434047 |  |
| 5510 | adenoma | AHRR      | 0.000075 | -3.424512 |  |
| 5511 | adenoma | CD14      | 0.000013 | -3.41472  |  |
| 5512 | adenoma | NDUFV1    | 0.001768 | -3.405372 |  |
| 5513 | adenoma | PPIB      | 0.00001  | -3.403223 |  |
| 5514 | adenoma | MFAP4     | 0        | -3.393558 |  |
| 5515 | adenoma | AIF1      | 0.000082 | -3.388451 |  |
| 5516 | adenoma | SLC17A4   | 0.000002 | -3.387147 |  |
| 5517 | adenoma | MLXIP     | 0.001034 | -3.386402 |  |
| 5518 | adenoma | CD300A    | 0.000001 | -3.383942 |  |
| 5519 | adenoma | TIMM13    | 0.000871 | -3.379752 |  |
| 5520 | adenoma | PCDH7     | 0.000022 | -3.361762 |  |
| 5521 | adenoma | SRPX      | 0.000007 | -3.357829 |  |
| 5522 | adenoma | NOL9      | 0.00149  | -3.357671 |  |
| 5523 | adenoma | S100A8    | 0.000001 | -3.352349 |  |
| 5524 | adenoma | NOVA1     | 0.000072 | -3.351954 |  |
| 5525 | adenoma | RNF213    | 0.002078 | -3.329022 |  |
| 5526 | adenoma | IDH3A     | 0.001709 | -3.325995 |  |
| 5527 | adenoma | USP1      | 0.000745 | -3.324365 |  |
| 5528 | adenoma | PAMR1     | 0.000002 | -3.31603  |  |
| 5529 | adenoma | ZNF791    | 0.000279 | -3.314098 |  |
| 5530 | adenoma | SAMD9     | 0.000058 | -3.312558 |  |
| 5531 | adenoma | PDE7B     | 0        | -3.311536 |  |
| 5532 | adenoma | CHL1      | 0.000017 | -3.308172 |  |
| 5533 | adenoma | WTAP      | 0.000189 | -3.308103 |  |
| 5534 | adenoma | TBC1D22A  | 0.002108 | -3.297469 |  |
| 5535 | adenoma | RAB8A     | 0.002192 | -3.294049 |  |
| 5536 | adenoma | UPP1      | 0.000072 | -3.293296 |  |
| 5537 | adenoma | FAM110B   | 0.000001 | -3.283492 |  |
| 5538 | adenoma | NCF4      | 0.000022 | -3.282698 |  |
| 5539 | adenoma | C20orf194 | 0        | -3.28122  |  |
| 5540 | adenoma | CDCA7     | 0.000744 | -3.27528  |  |
| 5541 | adenoma | HNRNPC    | 0.000704 | -3.273079 |  |
| 5542 | adenoma | ATG7      | 0.001182 | -3.263631 |  |
| 5543 | adenoma | LOC401022 | 0        | -3.262621 |  |
| 5544 | adenoma | PRR11     | 0.001855 | -3.244226 |  |
| 5545 | adenoma | SFMBT2    | 0.000001 | -3.24373  |  |
| 5546 | adenoma | EMCN      | 0.000009 | -3.242664 |  |
| 5547 | adenoma | TRIM14    | 0.002192 | -3.230347 |  |
| 5548 | adenoma | PGAM1     | 0.001197 | -3.223489 |  |

|      |         |              |          |           |  |
|------|---------|--------------|----------|-----------|--|
| 5549 | adenoma | PDPK1        | 0.000588 | -3.202151 |  |
| 5550 | adenoma | NAP1L4       | 0.00038  | -3.201689 |  |
| 5551 | adenoma | U2AF1        | 0.000123 | -3.201448 |  |
| 5552 | adenoma | WIPF1        | 0.000006 | -3.18889  |  |
| 5553 | adenoma | MIR214       | 0.000015 | -3.185454 |  |
| 5554 | adenoma | CCNYL1       | 0.000005 | -3.18485  |  |
| 5555 | adenoma | NCL          | 0.000082 | -3.177353 |  |
| 5556 | adenoma | PTPRC        | 0.000015 | -3.171861 |  |
| 5557 | adenoma | EBF1         | 0.000026 | -3.164785 |  |
| 5558 | adenoma | ZC3H7A       | 0.001616 | -3.163694 |  |
| 5559 | adenoma | SLC38A1      | 0.000658 | -3.163284 |  |
| 5560 | adenoma | ST14         | 0.001286 | -3.153344 |  |
| 5561 | adenoma | LOC100508909 | 0.000004 | -3.147079 |  |
| 5562 | adenoma | PDE6A        | 0        | -3.146689 |  |
| 5563 | adenoma | EPPK1        | 0.000193 | -3.14574  |  |
| 5564 | adenoma | HIPK2        | 0.001981 | -3.139042 |  |
| 5565 | adenoma | MIB1         | 0.002122 | -3.136432 |  |
| 5566 | adenoma | HLF          | 0.000001 | -3.135844 |  |
| 5567 | adenoma | KEAP1        | 0.001597 | -3.129816 |  |
| 5568 | adenoma | CNTN1        | 0.000002 | -3.122925 |  |
| 5569 | adenoma | PADI2        | 0        | -3.121707 |  |
| 5570 | adenoma | KCNIP2       | 0.000042 | -3.119855 |  |
| 5571 | adenoma | DNASE1L3     | 0.000027 | -3.119775 |  |
| 5572 | adenoma | RCAN2        | 0        | -3.119317 |  |
| 5573 | adenoma | IFRD2        | 0.000931 | -3.11365  |  |
| 5574 | adenoma | C1S          | 0        | -3.112694 |  |
| 5575 | adenoma | HTR2B        | 0.000205 | -3.10838  |  |
| 5576 | adenoma | TRIM25       | 0.000315 | -3.102752 |  |
| 5577 | adenoma | CCL18        | 0.000032 | -3.10227  |  |
| 5578 | adenoma | NKX2-3       | 0.000074 | -3.096098 |  |
| 5579 | adenoma | SRSF3        | 0.001034 | -3.09025  |  |
| 5580 | adenoma | MMP2         | 0.000043 | -3.089364 |  |
| 5581 | adenoma | PLA2G10      | 0        | -3.086968 |  |
| 5582 | adenoma | GGA3         | 0.000526 | -3.066348 |  |
| 5583 | adenoma | NFIA         | 0.000419 | -3.064992 |  |
| 5584 | adenoma | DES          | 0.000264 | -3.063024 |  |
| 5585 | adenoma | HSD11B1      | 0.000217 | -3.061173 |  |
| 5586 | adenoma | CCL28        | 0.000005 | -3.053933 |  |
| 5587 | adenoma | C5orf46      | 0.000007 | -3.04792  |  |
| 5588 | adenoma | TNFAIP6      | 0        | -3.046939 |  |
| 5589 | adenoma | APPL2        | 0        | -3.042915 |  |
| 5590 | adenoma | OTUB1        | 0.000279 | -3.037385 |  |
| 5591 | adenoma | LRRC19       | 0        | -3.037023 |  |
| 5592 | adenoma | BCAT1        | 0.000001 | -3.015072 |  |
| 5593 | adenoma | PMP22        | 0.000002 | -3.011268 |  |
| 5594 | adenoma | SLC39A3      | 0.000776 | -3.004355 |  |
| 5595 | adenoma | HIP1         | 0.000051 | -3.001035 |  |
| 5596 | adenoma | RNASEK       | 0.001468 | -3.000378 |  |
| 5597 | adenoma | FAM20A       | 0.000019 | -2.998583 |  |
| 5598 | adenoma | PROK2        | 0.0001   | -2.985051 |  |

|      |         |              |          |           |  |
|------|---------|--------------|----------|-----------|--|
| 5599 | adenoma | RERG         | 0        | -2.9816   |  |
| 5600 | adenoma | PAQR5        | 0        | -2.981438 |  |
| 5601 | adenoma | MAFB         | 0.000031 | -2.981246 |  |
| 5602 | adenoma | MATN2        | 0        | -2.980745 |  |
| 5603 | adenoma | NDUFA11      | 0.00165  | -2.972663 |  |
| 5604 | adenoma | ADAM28       | 0.00001  | -2.969096 |  |
| 5605 | adenoma | CCDC68       | 0        | -2.964773 |  |
| 5606 | adenoma | ITPR1        | 0.000003 | -2.958448 |  |
| 5607 | adenoma | CTBP1        | 0.000745 | -2.953216 |  |
| 5608 | adenoma | PDE5A        | 0        | -2.953031 |  |
| 5609 | adenoma | HPSE         | 0.000018 | -2.95219  |  |
| 5610 | adenoma | NNMT         | 0.00001  | -2.951044 |  |
| 5611 | adenoma | GJB2         | 0.000007 | -2.946941 |  |
| 5612 | adenoma | SSR1         | 0.000905 | -2.942659 |  |
| 5613 | adenoma | GREM1        | 0.010844 | -2.942333 |  |
| 5614 | adenoma | SFRP2        | 0.000001 | -2.937539 |  |
| 5615 | adenoma | CLIP4        | 0.000009 | -2.937125 |  |
| 5616 | adenoma | CAMK2N1      | 0        | -2.936385 |  |
| 5617 | adenoma | MXI1         | 0        | -2.933559 |  |
| 5618 | adenoma | BRI3BP       | 0.001018 | -2.933366 |  |
| 5619 | adenoma | ISM1         | 0        | -2.933199 |  |
| 5620 | adenoma | ARPC5L       | 0.000536 | -2.924573 |  |
| 5621 | adenoma | SOX10        | 0.000003 | -2.909432 |  |
| 5622 | adenoma | C13orf15     | 0        | -2.90779  |  |
| 5623 | adenoma | MAGT1        | 0.001062 | -2.907141 |  |
| 5624 | adenoma | BCL2A1       | 0.000003 | -2.90518  |  |
| 5625 | adenoma | GIMAP7       | 0        | -2.904896 |  |
| 5626 | adenoma | SPEG         | 0.000001 | -2.903121 |  |
| 5627 | adenoma | BAHCC1       | 0.000001 | -2.897976 |  |
| 5628 | adenoma | ELOVL6       | 0.000025 | -2.895058 |  |
| 5629 | adenoma | AK4          | 0.00127  | -2.893044 |  |
| 5630 | adenoma | EIF3B        | 0.001726 | -2.892745 |  |
| 5631 | adenoma | GALNT12      | 0        | -2.885483 |  |
| 5632 | adenoma | CNN1         | 0.000235 | -2.885419 |  |
| 5633 | adenoma | MTDH         | 0.002092 | -2.883258 |  |
| 5634 | adenoma | PWP1         | 0.000849 | -2.881134 |  |
| 5635 | adenoma | IQCA1        | 0.000001 | -2.880315 |  |
| 5636 | adenoma | COL14A1      | 0.000027 | -2.880001 |  |
| 5637 | adenoma | SSPN         | 0        | -2.878351 |  |
| 5638 | adenoma | FBXO9        | 0.000279 | -2.877366 |  |
| 5639 | adenoma | SART3        | 0.002181 | -2.867926 |  |
| 5640 | adenoma | MCM7         | 0.001197 | -2.864753 |  |
| 5641 | adenoma | YIF1A        | 0.001408 | -2.862812 |  |
| 5642 | adenoma | LOC100132891 | 0.000007 | -2.857789 |  |
| 5643 | adenoma | LRFN4        | 0.001286 | -2.854454 |  |
| 5644 | adenoma | WHSC1        | 0.001286 | -2.851894 |  |
| 5645 | adenoma | ITGA8        | 0.000005 | -2.847531 |  |
| 5646 | adenoma | ZDHHC12      | 0.002087 | -2.845202 |  |
| 5647 | adenoma | HNRNPA3      | 0.000536 | -2.845125 |  |
| 5648 | adenoma | SCD5         | 0.000011 | -2.844648 |  |

|      |         |           |          |           |  |
|------|---------|-----------|----------|-----------|--|
| 5649 | adenoma | ATP8B2    | 0.000011 | -2.842167 |  |
| 5650 | adenoma | ARF1      | 0.000744 | -2.842141 |  |
| 5651 | adenoma | GLUD1     | 0.002122 | -2.840846 |  |
| 5652 | adenoma | LOC645323 | 0.000025 | -2.839439 |  |
| 5653 | adenoma | FOXF1     | 0.000035 | -2.838865 |  |
| 5654 | adenoma | ZNF677    | 0        | -2.838379 |  |
| 5655 | adenoma | SLC36A1   | 0.000001 | -2.838295 |  |
| 5656 | adenoma | STOML2    | 0.002108 | -2.83758  |  |
| 5657 | adenoma | RFTN1     | 0.000018 | -2.831749 |  |
| 5658 | adenoma | IL6       | 0.000005 | -2.827798 |  |
| 5659 | adenoma | HHIP      | 0        | -2.822572 |  |
| 5660 | adenoma | HAS1      | 0.000008 | -2.816339 |  |
| 5661 | adenoma | ITM2A     | 0.000004 | -2.813288 |  |
| 5662 | adenoma | MRPL11    | 0.000588 | -2.811379 |  |
| 5663 | adenoma | ATP6V0D1  | 0.001669 | -2.798414 |  |
| 5664 | adenoma | CECR5     | 0.00013  | -2.790449 |  |
| 5665 | adenoma | TBC1D9    | 0        | -2.789546 |  |
| 5666 | adenoma | CCDC8     | 0.000013 | -2.786944 |  |
| 5667 | adenoma | TPM3      | 0.001005 | -2.786129 |  |
| 5668 | adenoma | LRRC16A   | 0.001885 | -2.781349 |  |
| 5669 | adenoma | GLIPR2    | 0        | -2.779996 |  |
| 5670 | adenoma | CASK      | 0.000677 | -2.777413 |  |
| 5671 | adenoma | CPSF4     | 0.001018 | -2.776651 |  |
| 5672 | adenoma | C20orf103 | 0.000006 | -2.775791 |  |
| 5673 | adenoma | PPP2R3A   | 0        | -2.771681 |  |
| 5674 | adenoma | SFPQ      | 0.000462 | -2.769325 |  |
| 5675 | adenoma | HOXD4     | 0        | -2.764491 |  |
| 5676 | adenoma | PAK4      | 0.001018 | -2.764101 |  |
| 5677 | adenoma | SGCE      | 0        | -2.761216 |  |
| 5678 | adenoma | ARPC4     | 0.000385 | -2.760967 |  |
| 5679 | adenoma | KPNB1     | 0.000526 | -2.760426 |  |
| 5680 | adenoma | TNXB      | 0        | -2.759854 |  |
| 5681 | adenoma | FAM120A   | 0.00162  | -2.758222 |  |
| 5682 | adenoma | LCP2      | 0.000001 | -2.756829 |  |
| 5683 | adenoma | PDGFRL    | 0.000134 | -2.755988 |  |
| 5684 | adenoma | CLIC2     | 0.000004 | -2.754874 |  |
| 5685 | adenoma | KLRK1     | 0.000001 | -2.753093 |  |
| 5686 | adenoma | DAZAP1    | 0.000817 | -2.746504 |  |
| 5687 | adenoma | JAM2      | 0        | -2.74367  |  |
| 5688 | adenoma | SRPRB     | 0.000404 | -2.742546 |  |
| 5689 | adenoma | ATG4B     | 0.000385 | -2.741098 |  |
| 5690 | adenoma | A2M       | 0        | -2.737539 |  |
| 5691 | adenoma | SMARCA4   | 0.000385 | -2.735501 |  |
| 5692 | adenoma | PDGFD     | 0        | -2.728425 |  |
| 5693 | adenoma | VPS37C    | 0.00013  | -2.725503 |  |
| 5694 | adenoma | GPR172A   | 0.001468 | -2.717345 |  |
| 5695 | adenoma | BPMS2     | 0.000012 | -2.716139 |  |
| 5696 | adenoma | FCGR3B    | 0.000001 | -2.715186 |  |
| 5697 | adenoma | ZFP36L2   | 0.002061 | -2.713243 |  |
| 5698 | adenoma | HIC1      | 0        | -2.712245 |  |

|      |         |           |          |           |  |
|------|---------|-----------|----------|-----------|--|
| 5699 | adenoma | ST8SIA4   | 0.000004 | -2.708861 |  |
| 5700 | adenoma | FAM101B   | 0.000016 | -2.705595 |  |
| 5701 | adenoma | PDCD4     | 0        | -2.702497 |  |
| 5702 | adenoma | KIAA1211  | 0        | -2.700693 |  |
| 5703 | adenoma | ACP5      | 0.000011 | -2.698381 |  |
| 5704 | adenoma | ANKRD43   | 0        | -2.694987 |  |
| 5705 | adenoma | MMP23A    | 0        | -2.689529 |  |
| 5706 | adenoma | STARD7    | 0.00001  | -2.687573 |  |
| 5707 | adenoma | HLA-DPA1  | 0.000001 | -2.685678 |  |
| 5708 | adenoma | ADCY2     | 0        | -2.684973 |  |
| 5709 | adenoma | MAOA      | 0        | -2.684169 |  |
| 5710 | adenoma | LONP2     | 0.001468 | -2.682588 |  |
| 5711 | adenoma | CDKL1     | 0        | -2.680807 |  |
| 5712 | adenoma | SGK2      | 0        | -2.680358 |  |
| 5713 | adenoma | DOCK2     | 0.000011 | -2.677831 |  |
| 5714 | adenoma | RNPS1     | 0.000447 | -2.670389 |  |
| 5715 | adenoma | QKI       | 0.000001 | -2.669064 |  |
| 5716 | adenoma | DZIP1     | 0.000004 | -2.664127 |  |
| 5717 | adenoma | MAB21L2   | 0        | -2.662187 |  |
| 5718 | adenoma | PRELP     | 0.000259 | -2.66053  |  |
| 5719 | adenoma | TMEM33    | 0.000576 | -2.657315 |  |
| 5720 | adenoma | LOC728392 | 0.000002 | -2.655484 |  |
| 5721 | adenoma | FAM38B    | 0        | -2.654328 |  |
| 5722 | adenoma | SPG20     | 0.000013 | -2.650279 |  |
| 5723 | adenoma | SMPD1     | 0.000052 | -2.647116 |  |
| 5724 | adenoma | HNRNPH1   | 0.001009 | -2.646206 |  |
| 5725 | adenoma | NPAS3     | 0.000004 | -2.641488 |  |
| 5726 | adenoma | MED1      | 0.000942 | -2.641451 |  |
| 5727 | adenoma | KHSRP     | 0.001874 | -2.641428 |  |
| 5728 | adenoma | CEACAM21  | 0        | -2.641099 |  |
| 5729 | adenoma | PPAP2A    | 0        | -2.635656 |  |
| 5730 | adenoma | DCUN1D1   | 0.002141 | -2.63365  |  |
| 5731 | adenoma | CHERP     | 0.00044  | -2.629727 |  |
| 5732 | adenoma | PTBP1     | 0.000849 | -2.62492  |  |
| 5733 | adenoma | MLL5      | 0.000817 | -2.618467 |  |
| 5734 | adenoma | PPIH      | 0.001617 | -2.618016 |  |
| 5735 | adenoma | PLEKHJ1   | 0.001303 | -2.606714 |  |
| 5736 | adenoma | UBE3C     | 0.000809 | -2.604562 |  |
| 5737 | adenoma | FLJ13744  | 0.000006 | -2.603456 |  |
| 5738 | adenoma | ACTR2     | 0.00013  | -2.597419 |  |
| 5739 | adenoma | PEG3      | 0.000003 | -2.596887 |  |
| 5740 | adenoma | WDR5      | 0.001709 | -2.596871 |  |
| 5741 | adenoma | CCNY      | 0.000251 | -2.595556 |  |
| 5742 | adenoma | C15orf61  | 0.000745 | -2.595194 |  |
| 5743 | adenoma | DPYSL3    | 0.000011 | -2.593683 |  |
| 5744 | adenoma | SRI       | 0        | -2.591347 |  |
| 5745 | adenoma | LSP1      | 0.000003 | -2.589832 |  |
| 5746 | adenoma | GIMAP4    | 0        | -2.582242 |  |
| 5747 | adenoma | NLRC3     | 0.000001 | -2.580819 |  |
| 5748 | adenoma | ATP5S     | 0        | -2.576273 |  |

|      |         |              |          |           |  |
|------|---------|--------------|----------|-----------|--|
| 5749 | adenoma | TNPO2        | 0.000536 | -2.573375 |  |
| 5750 | adenoma | ITGA4        | 0        | -2.560951 |  |
| 5751 | adenoma | EFEMP1       | 0.000005 | -2.560292 |  |
| 5752 | adenoma | NACAD        | 0        | -2.55511  |  |
| 5753 | adenoma | ITGAL        | 0.000014 | -2.552855 |  |
| 5754 | adenoma | PRICKLE1     | 0.000006 | -2.552477 |  |
| 5755 | adenoma | COL1A2       | 0.000056 | -2.549058 |  |
| 5756 | adenoma | FYB          | 0.000003 | -2.54851  |  |
| 5757 | adenoma | PTPRH        | 0        | -2.546098 |  |
| 5758 | adenoma | IL1RN        | 0.000005 | -2.545738 |  |
| 5759 | adenoma | CCR2         | 0.000009 | -2.545477 |  |
| 5760 | adenoma | WWTR1        | 0        | -2.544909 |  |
| 5761 | adenoma | COL10A1      | 0.000076 | -2.543026 |  |
| 5762 | adenoma | TWIST1       | 0        | -2.542915 |  |
| 5763 | adenoma | LOC100128252 | 0.000019 | -2.538955 |  |
| 5764 | adenoma | REXO1        | 0.000011 | -2.536593 |  |
| 5765 | adenoma | METTL7A      | 0        | -2.536472 |  |
| 5766 | adenoma | FAM55C       | 0.000009 | -2.534637 |  |
| 5767 | adenoma | KLF4         | 0        | -2.531525 |  |
| 5768 | adenoma | CHRNA1       | 0.000001 | -2.530816 |  |
| 5769 | adenoma | FOLR2        | 0.000043 | -2.529423 |  |
| 5770 | adenoma | FOXF2        | 0.000023 | -2.529215 |  |
| 5771 | adenoma | PLCL2        | 0        | -2.528678 |  |
| 5772 | adenoma | PTN          | 0        | -2.525943 |  |
| 5773 | adenoma | PCDH18       | 0.000016 | -2.525923 |  |
| 5774 | adenoma | FPR1         | 0.000001 | -2.518758 |  |
| 5775 | adenoma | PEBP1        | 0.001299 | -2.513655 |  |
| 5776 | adenoma | MRPL12       | 0.00142  | -2.513479 |  |
| 5777 | adenoma | NR3C2        | 0        | -2.508277 |  |
| 5778 | adenoma | CD84         | 0.000019 | -2.50676  |  |
| 5779 | adenoma | DOCK8        | 0.000023 | -2.505324 |  |
| 5780 | adenoma | LOC388796    | 0.000087 | -2.504446 |  |
| 5781 | adenoma | KRT20        | 0.000067 | -2.501505 |  |
| 5782 | adenoma | TRBC1        | 0.000025 | -2.501359 |  |
| 5783 | adenoma | ADCY9        | 0        | -2.496971 |  |
| 5784 | adenoma | RELN         | 0.000002 | -2.493594 |  |
| 5785 | adenoma | SERPINF1     | 0.000012 | -2.489622 |  |
| 5786 | adenoma | SHQ1         | 0.000588 | -2.48934  |  |
| 5787 | adenoma | HNRNPA1      | 0.000677 | -2.488945 |  |
| 5788 | adenoma | PTPLAD2      | 0        | -2.488703 |  |
| 5789 | adenoma | EMILIN1      | 0.000018 | -2.488391 |  |
| 5790 | adenoma | LAPTM5       | 0.000074 | -2.486932 |  |
| 5791 | adenoma | CACNG1       | 0        | -2.483709 |  |
| 5792 | adenoma | TLCD2        | 0.000008 | -2.481418 |  |
| 5793 | adenoma | PSMD13       | 0.000159 | -2.480783 |  |
| 5794 | adenoma | GTPBP1       | 0.000283 | -2.479649 |  |
| 5795 | adenoma | RHOJ         | 0.000001 | -2.478906 |  |
| 5796 | adenoma | SALL1        | 0.000009 | -2.477997 |  |
| 5797 | adenoma | MSN          | 0.000019 | -2.474954 |  |
| 5798 | adenoma | GIMAP8       | 0.000018 | -2.474757 |  |

|      |         |              |          |           |  |
|------|---------|--------------|----------|-----------|--|
| 5799 | adenoma | SUMO3        | 0.000536 | -2.472359 |  |
| 5800 | adenoma | RUNX2        | 0.000176 | -2.470737 |  |
| 5801 | adenoma | H2AFY        | 0.000368 | -2.468491 |  |
| 5802 | adenoma | FZD8         | 0.000042 | -2.467017 |  |
| 5803 | adenoma | LOC100506941 | 0.000211 | -2.466491 |  |
| 5804 | adenoma | PGCP         | 0        | -2.464507 |  |
| 5805 | adenoma | TUFM         | 0.000214 | -2.46378  |  |
| 5806 | adenoma | WAS          | 0.000016 | -2.463565 |  |
| 5807 | adenoma | EFS          | 0.000001 | -2.461236 |  |
| 5808 | adenoma | TSPAN3       | 0.000007 | -2.46009  |  |
| 5809 | adenoma | MRPL20       | 0.000283 | -2.456302 |  |
| 5810 | adenoma | CCT2         | 0.00092  | -2.451786 |  |
| 5811 | adenoma | TXNRD1       | 0.001408 | -2.450252 |  |
| 5812 | adenoma | IGSF3        | 0        | -2.449265 |  |
| 5813 | adenoma | C1orf174     | 0.001726 | -2.448482 |  |
| 5814 | adenoma | HNF4A        | 0        | -2.448363 |  |
| 5815 | adenoma | TMEM47       | 0.000001 | -2.445538 |  |
| 5816 | adenoma | WDR43        | 0.002218 | -2.44204  |  |
| 5817 | adenoma | APRT         | 0.000817 | -2.441156 |  |
| 5818 | adenoma | PTGS2        | 0.000015 | -2.437461 |  |
| 5819 | adenoma | ANGPTL4      | 0.000032 | -2.435153 |  |
| 5820 | adenoma | CERK         | 0        | -2.432117 |  |
| 5821 | adenoma | GJC1         | 0.00003  | -2.430532 |  |
| 5822 | adenoma | HLA-DPB1     | 0.000004 | -2.42914  |  |
| 5823 | adenoma | NAMPT        | 0.000001 | -2.429104 |  |
| 5824 | adenoma | IL18BP       | 0.00002  | -2.423986 |  |
| 5825 | adenoma | GLI1         | 0.000009 | -2.42391  |  |
| 5826 | adenoma | FBN1         | 0.000002 | -2.4229   |  |
| 5827 | adenoma | NRK          | 0.000002 | -2.420558 |  |
| 5828 | adenoma | AGTR1        | 0.000014 | -2.417771 |  |
| 5829 | adenoma | LOC389249    | 0        | -2.417206 |  |
| 5830 | adenoma | SUZ12        | 0.000576 | -2.41633  |  |
| 5831 | adenoma | SCAMP1       | 0.001921 | -2.415113 |  |
| 5832 | adenoma | SHE          | 0.000029 | -2.413364 |  |
| 5833 | adenoma | ARHGEF17     | 0.000001 | -2.412614 |  |
| 5834 | adenoma | RAD23B       | 0.002247 | -2.411764 |  |
| 5835 | adenoma | FTH1         | 0        | -2.404593 |  |
| 5836 | adenoma | OLFML2A      | 0.000002 | -2.402962 |  |
| 5837 | adenoma | FAM116A      | 0.000536 | -2.401477 |  |
| 5838 | adenoma | CYSLTR1      | 0        | -2.399178 |  |
| 5839 | adenoma | SRP72        | 0.000745 | -2.397696 |  |
| 5840 | adenoma | CA12         | 0        | -2.396817 |  |
| 5841 | adenoma | MPDZ         | 0.000005 | -2.394859 |  |
| 5842 | adenoma | CHRD1        | 0.000014 | -2.391992 |  |
| 5843 | adenoma | DUT          | 0.001823 | -2.391851 |  |
| 5844 | adenoma | ACAT1        | 0        | -2.391491 |  |
| 5845 | adenoma | THSD7A       | 0.000006 | -2.39099  |  |
| 5846 | adenoma | LOC100133660 | 0        | -2.389821 |  |
| 5847 | adenoma | SALL2        | 0.000034 | -2.388978 |  |
| 5848 | adenoma | AEBP1        | 0.000161 | -2.388711 |  |



|      |         |            |          |           |  |
|------|---------|------------|----------|-----------|--|
| 5849 | adenoma | NHSL1      | 0        | -2.387015 |  |
| 5850 | adenoma | SYNPO2     | 0.000116 | -2.386825 |  |
| 5851 | adenoma | RPP14      | 0.000726 | -2.382162 |  |
| 5852 | adenoma | CHI3L1     | 0.00012  | -2.381957 |  |
| 5853 | adenoma | SSTR2      | 0        | -2.3807   |  |
| 5854 | adenoma | LDB2       | 0.000015 | -2.378466 |  |
| 5855 | adenoma | GZMA       | 0.000012 | -2.377783 |  |
| 5856 | adenoma | AGTR2      | 0.000004 | -2.37389  |  |
| 5857 | adenoma | ITGBL1     | 0.000011 | -2.373081 |  |
| 5858 | adenoma | UBE2N      | 0.001886 | -2.372987 |  |
| 5859 | adenoma | NADK       | 0.000881 | -2.368055 |  |
| 5860 | adenoma | FAM13C     | 0.000001 | -2.367818 |  |
| 5861 | adenoma | EVL        | 0.000017 | -2.365015 |  |
| 5862 | adenoma | FOXC1      | 0.00015  | -2.36447  |  |
| 5863 | adenoma | NOP14      | 0.000536 | -2.362674 |  |
| 5864 | adenoma | TUBA4A     | 0.001163 | -2.351077 |  |
| 5865 | adenoma | RMND5A     | 0        | -2.349248 |  |
| 5866 | adenoma | RECK       | 0        | -2.348067 |  |
| 5867 | adenoma | FBXO11     | 0.001033 | -2.347149 |  |
| 5868 | adenoma | AAK1       | 0        | -2.345226 |  |
| 5869 | adenoma | EGR4       | 0.000011 | -2.344928 |  |
| 5870 | adenoma | TMCO3      | 0.001874 | -2.344777 |  |
| 5871 | adenoma | CALHM2     | 0.000001 | -2.344725 |  |
| 5872 | adenoma | FMO5       | 0        | -2.34472  |  |
| 5873 | adenoma | PRKAR2A    | 0.002076 | -2.343637 |  |
| 5874 | adenoma | SPARC      | 0.000001 | -2.342933 |  |
| 5875 | adenoma | FAM78A     | 0.000021 | -2.339397 |  |
| 5876 | adenoma | VIM        | 0        | -2.336821 |  |
| 5877 | adenoma | EREG       | 0.025572 | -2.336315 |  |
| 5878 | adenoma | CD3D       | 0.000015 | -2.333476 |  |
| 5879 | adenoma | FAM156A    | 0.000419 | -2.333365 |  |
| 5880 | adenoma | LUM        | 0.000004 | -2.332403 |  |
| 5881 | adenoma | SOCS3      | 0.000008 | -2.329779 |  |
| 5882 | adenoma | NCRNA00294 | 0        | -2.329114 |  |
| 5883 | adenoma | ARF3       | 0.000656 | -2.327501 |  |
| 5884 | adenoma | CLMN       | 0        | -2.326686 |  |
| 5885 | adenoma | COPZ2      | 0.000012 | -2.324949 |  |
| 5886 | adenoma | HSP90AA1   | 0.002227 | -2.323099 |  |
| 5887 | adenoma | SNRPA1     | 0.001286 | -2.320686 |  |
| 5888 | adenoma | COL11A1    | 0.000058 | -2.320574 |  |
| 5889 | adenoma | FBXO17     | 0.000111 | -2.317715 |  |
| 5890 | adenoma | HSPC159    | 0.000034 | -2.315064 |  |
| 5891 | adenoma | CYR61      | 0.000231 | -2.314814 |  |
| 5892 | adenoma | PDIA3      | 0.002126 | -2.314593 |  |
| 5893 | adenoma | MLEC       | 0.001417 | -2.311297 |  |
| 5894 | adenoma | VSTM2L     | 0.000002 | -2.307386 |  |
| 5895 | adenoma | ACOT7      | 0.00013  | -2.307244 |  |
| 5896 | adenoma | ITK        | 0.00002  | -2.305504 |  |
| 5897 | adenoma | GNG7       | 0        | -2.304948 |  |
| 5898 | adenoma | PLAC4      | 0.000031 | -2.303985 |  |

|      |         |              |          |           |  |
|------|---------|--------------|----------|-----------|--|
| 5899 | adenoma | CCL3         | 0.000005 | -2.302453 |  |
| 5900 | adenoma | CLEC3B       | 0.000002 | -2.301045 |  |
| 5901 | adenoma | NDUFS3       | 0.001353 | -2.298996 |  |
| 5902 | adenoma | PPP1R3C      | 0.000007 | -2.298722 |  |
| 5903 | adenoma | APOLD1       | 0.000012 | -2.298628 |  |
| 5904 | adenoma | COX8A        | 0.00142  | -2.297831 |  |
| 5905 | adenoma | MORF4L2      | 0.000279 | -2.297727 |  |
| 5906 | adenoma | PAFAH1B2     | 0.001148 | -2.297254 |  |
| 5907 | adenoma | C14orf58     | 0.000001 | -2.296371 |  |
| 5908 | adenoma | RGS4         | 0.000044 | -2.294983 |  |
| 5909 | adenoma | INHBA        | 0.000049 | -2.294081 |  |
| 5910 | adenoma | CMKLR1       | 0.000252 | -2.293257 |  |
| 5911 | adenoma | SPCS3        | 0.001018 | -2.292755 |  |
| 5912 | adenoma | MIER3        | 0.000002 | -2.292537 |  |
| 5913 | adenoma | ITPKA        | 0.000008 | -2.28995  |  |
| 5914 | adenoma | SPTLC1       | 0.00083  | -2.289582 |  |
| 5915 | adenoma | SPPL2A       | 0.000001 | -2.288713 |  |
| 5916 | adenoma | IGSF9        | 0.000003 | -2.288617 |  |
| 5917 | adenoma | EGFR         | 0.000217 | -2.287943 |  |
| 5918 | adenoma | ECSCR        | 0.000017 | -2.284871 |  |
| 5919 | adenoma | IPO9         | 0.002341 | -2.282007 |  |
| 5920 | adenoma | KCP          | 0.000043 | -2.281315 |  |
| 5921 | adenoma | SEC61B       | 0.000679 | -2.280103 |  |
| 5922 | adenoma | SH2B3        | 0        | -2.278978 |  |
| 5923 | adenoma | IRF3         | 0.000849 | -2.278059 |  |
| 5924 | adenoma | STOX2        | 0.000013 | -2.27665  |  |
| 5925 | adenoma | TMEM223      | 0.001286 | -2.274972 |  |
| 5926 | adenoma | UPF1         | 0.002073 | -2.273385 |  |
| 5927 | adenoma | FAM129A      | 0        | -2.273048 |  |
| 5928 | adenoma | EIF4G1       | 0.00148  | -2.272896 |  |
| 5929 | adenoma | NAP1L3       | 0.000007 | -2.269711 |  |
| 5930 | adenoma | LOC100509683 | 0.000054 | -2.268836 |  |
| 5931 | adenoma | SLC31A2      | 0        | -2.267722 |  |
| 5932 | adenoma | PTX3         | 0.000036 | -2.267174 |  |
| 5933 | adenoma | PDLIM4       | 0        | -2.260782 |  |
| 5934 | adenoma | LOC284417    | 0.046729 | -2.257994 |  |
| 5935 | adenoma | VPS4A        | 0.00206  | -2.257618 |  |
| 5936 | adenoma | COL1A1       | 0.004352 | -2.256916 |  |
| 5937 | adenoma | MSRB3        | 0.000006 | -2.25566  |  |
| 5938 | adenoma | CR1          | 0        | -2.252357 |  |
| 5939 | adenoma | DPY30        | 0.001558 | -2.251484 |  |
| 5940 | adenoma | THBS1        | 0.000001 | -2.250588 |  |
| 5941 | adenoma | SURF4        | 0.000385 | -2.249222 |  |
| 5942 | adenoma | RPL8         | 0.001616 | -2.249196 |  |
| 5943 | adenoma | CCT6A        | 0.002122 | -2.248994 |  |
| 5944 | adenoma | RETSAT       | 0        | -2.248071 |  |
| 5945 | adenoma | U2AF2        | 0.001714 | -2.24803  |  |
| 5946 | adenoma | SLC25A23     | 0        | -2.247985 |  |
| 5947 | adenoma | STRADB       | 0        | -2.243845 |  |
| 5948 | adenoma | RBMS1        | 0        | -2.242471 |  |

|      |         |              |          |           |  |
|------|---------|--------------|----------|-----------|--|
| 5949 | adenoma | DKK3         | 0        | -2.238933 |  |
| 5950 | adenoma | ARHGAP25     | 0.000013 | -2.238708 |  |
| 5951 | adenoma | SERPING1     | 0.00012  | -2.235442 |  |
| 5952 | adenoma | PNMAL1       | 0.000007 | -2.234743 |  |
| 5953 | adenoma | C2orf28      | 0.002108 | -2.233873 |  |
| 5954 | adenoma | TNFRSF25     | 0.000015 | -2.23356  |  |
| 5955 | adenoma | FNDC4        | 0.000031 | -2.233419 |  |
| 5956 | adenoma | KDEL2        | 0.00202  | -2.233364 |  |
| 5957 | adenoma | IL27RA       | 0.000041 | -2.23143  |  |
| 5958 | adenoma | KRT10        | 0.000726 | -2.228459 |  |
| 5959 | adenoma | TAGLN        | 0.000196 | -2.227987 |  |
| 5960 | adenoma | COL12A1      | 0.000002 | -2.227158 |  |
| 5961 | adenoma | HNRNPM       | 0.00019  | -2.225713 |  |
| 5962 | adenoma | GFPT2        | 0.000196 | -2.225548 |  |
| 5963 | adenoma | FAM195A      | 0.000905 | -2.225473 |  |
| 5964 | adenoma | PPP1CC       | 0.001286 | -2.225143 |  |
| 5965 | adenoma | ST3GAL6      | 0.000007 | -2.217513 |  |
| 5966 | adenoma | CD86         | 0.000017 | -2.21729  |  |
| 5967 | adenoma | C15orf48     | 0.000019 | -2.215116 |  |
| 5968 | adenoma | LOC100507165 | 0.000001 | -2.214475 |  |
| 5969 | adenoma | CRLF1        | 0.000157 | -2.214226 |  |
| 5970 | adenoma | SLC1A3       | 0.000003 | -2.213189 |  |
| 5971 | adenoma | GLOD5        | 0        | -2.212898 |  |
| 5972 | adenoma | CTTN         | 0.002192 | -2.209567 |  |
| 5973 | adenoma | MAGED4       | 0        | -2.208615 |  |
| 5974 | adenoma | DENR         | 0.000995 | -2.207376 |  |
| 5975 | adenoma | CSF3         | 0.000005 | -2.207    |  |
| 5976 | adenoma | EXOSC2       | 0.001558 | -2.205137 |  |
| 5977 | adenoma | AP3D1        | 0.000335 | -2.20501  |  |
| 5978 | adenoma | CCL4         | 0        | -2.204871 |  |
| 5979 | adenoma | RUNX3        | 0.000003 | -2.204119 |  |
| 5980 | adenoma | MS4A6A       | 0.000006 | -2.202884 |  |
| 5981 | adenoma | MEG3         | 0.000017 | -2.201433 |  |
| 5982 | adenoma | GADD45B      | 0.000001 | -2.199071 |  |
| 5983 | adenoma | PPHLN1       | 0.002183 | -2.193358 |  |
| 5984 | adenoma | CILP2        | 0.000112 | -2.193145 |  |
| 5985 | adenoma | C14orf132    | 0.000001 | -2.192972 |  |
| 5986 | adenoma | NPR1         | 0.000101 | -2.192109 |  |
| 5987 | adenoma | SPCS1        | 0.000905 | -2.190451 |  |
| 5988 | adenoma | MRP63        | 0.000315 | -2.189177 |  |
| 5989 | adenoma | TARP         | 0.000004 | -2.185572 |  |
| 5990 | adenoma | SLC16A7      | 0.000049 | -2.185442 |  |
| 5991 | adenoma | NDUFA10      | 0.001565 | -2.184389 |  |
| 5992 | adenoma | FST          | 0.000004 | -2.184259 |  |
| 5993 | adenoma | AKAP12       | 0        | -2.18236  |  |
| 5994 | adenoma | TSPAN4       | 0.000036 | -2.182007 |  |
| 5995 | adenoma | TBCD         | 0.000002 | -2.181333 |  |
| 5996 | adenoma | TROVE2       | 0.001768 | -2.179221 |  |
| 5997 | adenoma | ZMAT2        | 0.001565 | -2.177922 |  |
| 5998 | adenoma | ETS1         | 0.000009 | -2.177302 |  |

|      |         |              |          |           |  |
|------|---------|--------------|----------|-----------|--|
| 5999 | adenoma | SLCO2A1      | 0.000048 | -2.17587  |  |
| 6000 | adenoma | NEURL1B      | 0        | -2.170687 |  |
| 6001 | adenoma | ACSS2        | 0        | -2.168338 |  |
| 6002 | adenoma | PLCE1        | 0        | -2.168136 |  |
| 6003 | adenoma | XIAP         | 0.00003  | -2.166723 |  |
| 6004 | adenoma | LOC100510525 | 0.001987 | -2.16276  |  |
| 6005 | adenoma | PLCXD3       | 0.000162 | -2.161158 |  |
| 6006 | adenoma | MTCH1        | 0.000132 | -2.160284 |  |
| 6007 | adenoma | HLA-DOA      | 0.000026 | -2.159713 |  |
| 6008 | adenoma | CD3E         | 0.000009 | -2.159225 |  |
| 6009 | adenoma | CARS         | 0.001558 | -2.154752 |  |
| 6010 | adenoma | OLFML3       | 0.000002 | -2.154377 |  |
| 6011 | adenoma | SPESP1       | 0.000006 | -2.154017 |  |
| 6012 | adenoma | AGXT2L2      | 0        | -2.153903 |  |
| 6013 | adenoma | OSTM1        | 0.000001 | -2.15371  |  |
| 6014 | adenoma | ITGA5        | 0.000006 | -2.152342 |  |
| 6015 | adenoma | HEG1         | 0.000007 | -2.150429 |  |
| 6016 | adenoma | CRYAB        | 0        | -2.149325 |  |
| 6017 | adenoma | HSPA6        | 0.000025 | -2.143799 |  |
| 6018 | adenoma | FMO1         | 0        | -2.143737 |  |
| 6019 | adenoma | RAB3GAP1     | 0.001286 | -2.142946 |  |
| 6020 | adenoma | CCL14-CCL15  | 0        | -2.142142 |  |
| 6021 | adenoma | C2orf7       | 0.000003 | -2.142112 |  |
| 6022 | adenoma | ZC3H4        | 0.000251 | -2.141748 |  |
| 6023 | adenoma | KLF9         | 0        | -2.141047 |  |
| 6024 | adenoma | UBE2E2       | 0        | -2.140143 |  |
| 6025 | adenoma | HNRNPAB      | 0.001286 | -2.139983 |  |
| 6026 | adenoma | MMP19        | 0        | -2.137628 |  |
| 6027 | adenoma | MAGEA4       | 0.000103 | -2.136    |  |
| 6028 | adenoma | AKAP9        | 0        | -2.135119 |  |
| 6029 | adenoma | TMBIM4       | 0.002319 | -2.134269 |  |
| 6030 | adenoma | PLIN5        | 0.000025 | -2.132731 |  |
| 6031 | adenoma | METTL2A      | 0.002192 | -2.131646 |  |
| 6032 | adenoma | C19orf59     | 0.000056 | -2.130184 |  |
| 6033 | adenoma | COL5A2       | 0.000219 | -2.129854 |  |
| 6034 | adenoma | C10orf72     | 0.000002 | -2.12672  |  |
| 6035 | adenoma | ARFGAP2      | 0.000947 | -2.125914 |  |
| 6036 | adenoma | TMEM45B      | 0        | -2.125697 |  |
| 6037 | adenoma | ESRRA        | 0.00038  | -2.122543 |  |
| 6038 | adenoma | C5orf30      | 0        | -2.122045 |  |
| 6039 | adenoma | MYO1A        | 0        | -2.121306 |  |
| 6040 | adenoma | MTCH2        | 0.000823 | -2.118692 |  |
| 6041 | adenoma | CTSC         | 0.000005 | -2.116743 |  |
| 6042 | adenoma | BCAP29       | 0.000079 | -2.114582 |  |
| 6043 | adenoma | KAT2B        | 0        | -2.114163 |  |
| 6044 | adenoma | INPP5A       | 0.000745 | -2.113808 |  |
| 6045 | adenoma | HNRNPD       | 0.000688 | -2.113807 |  |
| 6046 | adenoma | PIP5K1B      | 0.000059 | -2.11295  |  |
| 6047 | adenoma | GSPT1        | 0.002315 | -2.112942 |  |
| 6048 | adenoma | RPN2         | 0.002197 | -2.112401 |  |

|      |         |          |          |           |  |
|------|---------|----------|----------|-----------|--|
| 6049 | adenoma | PER3     | 0.000003 | -2.111868 |  |
| 6050 | adenoma | LHFP     | 0        | -2.111542 |  |
| 6051 | adenoma | 9-Sep    | 0.001886 | -2.111405 |  |
| 6052 | adenoma | HTRA1    | 0.000003 | -2.110659 |  |
| 6053 | adenoma | FLI1     | 0.000014 | -2.109904 |  |
| 6054 | adenoma | PREX2    | 0.000014 | -2.108912 |  |
| 6055 | adenoma | TMEM45A  | 0.000253 | -2.108061 |  |
| 6056 | adenoma | UCHL1    | 0.000017 | -2.107934 |  |
| 6057 | adenoma | USP7     | 0.002313 | -2.107195 |  |
| 6058 | adenoma | PTPRM    | 0.000026 | -2.103882 |  |
| 6059 | adenoma | NUDT5    | 0.001047 | -2.100914 |  |
| 6060 | adenoma | PLEK     | 0.000007 | -2.10009  |  |
| 6061 | adenoma | CALD1    | 0        | -2.099286 |  |
| 6062 | adenoma | CMTM3    | 0.000019 | -2.095868 |  |
| 6063 | adenoma | PDE1A    | 0.000005 | -2.095001 |  |
| 6064 | adenoma | DUSP1    | 0.000027 | -2.094565 |  |
| 6065 | adenoma | BASP1    | 0.000003 | -2.092224 |  |
| 6066 | adenoma | SRGN     | 0.000058 | -2.092168 |  |
| 6067 | adenoma | SORCS2   | 0.000131 | -2.088112 |  |
| 6068 | adenoma | TNC      | 0.000004 | -2.086421 |  |
| 6069 | adenoma | EEF2K    | 0        | -2.085721 |  |
| 6070 | adenoma | ANGPT1   | 0.000001 | -2.084996 |  |
| 6071 | adenoma | SEC13    | 0.00127  | -2.082674 |  |
| 6072 | adenoma | ERBB4    | 0.000028 | -2.082636 |  |
| 6073 | adenoma | GEM      | 0.000202 | -2.082297 |  |
| 6074 | adenoma | ZZEF1    | 0        | -2.079989 |  |
| 6075 | adenoma | ST7L     | 0.000001 | -2.079927 |  |
| 6076 | adenoma | SLK      | 0.002108 | -2.079769 |  |
| 6077 | adenoma | PTPN22   | 0        | -2.078373 |  |
| 6078 | adenoma | AP1S2    | 0        | -2.078222 |  |
| 6079 | adenoma | GLI3     | 0        | -2.077675 |  |
| 6080 | adenoma | ZNF331   | 0.000008 | -2.076409 |  |
| 6081 | adenoma | LAYN     | 0.000006 | -2.076001 |  |
| 6082 | adenoma | PRDM1    | 0.000004 | -2.074792 |  |
| 6083 | adenoma | KIAA0495 | 0.000042 | -2.074599 |  |
| 6084 | adenoma | MARCKS   | 0        | -2.070555 |  |
| 6085 | adenoma | SLC41A2  | 0        | -2.06901  |  |
| 6086 | adenoma | CD33     | 0.000014 | -2.066985 |  |
| 6087 | adenoma | ARID1A   | 0.001362 | -2.065637 |  |
| 6088 | adenoma | FUCA1    | 0.000083 | -2.063597 |  |
| 6089 | adenoma | PRRG3    | 0.000241 | -2.063196 |  |
| 6090 | adenoma | PDLIM2   | 0        | -2.062956 |  |
| 6091 | adenoma | NPLOC4   | 0.00102  | -2.061305 |  |
| 6092 | adenoma | KMO      | 0.000103 | -2.06096  |  |
| 6093 | adenoma | S1PR1    | 0.000005 | -2.059119 |  |
| 6094 | adenoma | PEX26    | 0.000003 | -2.0586   |  |
| 6095 | adenoma | GIMAP5   | 0.000009 | -2.058582 |  |
| 6096 | adenoma | TEX261   | 0.002108 | -2.058162 |  |
| 6097 | adenoma | ADAMTS5  | 0.000002 | -2.057966 |  |
| 6098 | adenoma | MOBKLB   | 0.000001 | -2.057892 |  |

|      |         |          |          |           |  |
|------|---------|----------|----------|-----------|--|
| 6099 | adenoma | NXN      | 0.000157 | -2.057025 |  |
| 6100 | adenoma | FAM69B   | 0.000183 | -2.056589 |  |
| 6101 | adenoma | GPD2     | 0.000027 | -2.05634  |  |
| 6102 | adenoma | SCAMP2   | 0.000699 | -2.054668 |  |
| 6103 | adenoma | ATP2A2   | 0.000849 | -2.054087 |  |
| 6104 | adenoma | KIAA1161 | 0        | -2.053903 |  |
| 6105 | adenoma | CARKD    | 0.001399 | -2.053087 |  |
| 6106 | adenoma | TMEM170A | 0        | -2.050047 |  |
| 6107 | adenoma | NT5DC1   | 0.001617 | -2.048611 |  |
| 6108 | adenoma | UXS1     | 0.002092 | -2.048549 |  |
| 6109 | adenoma | EIF4E    | 0.001597 | -2.047933 |  |
| 6110 | adenoma | CTSA     | 0        | -2.047801 |  |
| 6111 | adenoma | CNNM4    | 0.000002 | -2.047069 |  |
| 6112 | adenoma | ZEB1     | 0.000002 | -2.044585 |  |
| 6113 | adenoma | ARNTL    | 0.000073 | -2.04229  |  |
| 6114 | adenoma | MYO15B   | 0.000082 | -2.0422   |  |
| 6115 | adenoma | COPZ1    | 0.001622 | -2.040516 |  |
| 6116 | adenoma | MAGEL2   | 0.000183 | -2.039831 |  |
| 6117 | adenoma | FAS      | 0.000076 | -2.038597 |  |
| 6118 | adenoma | HBE1     | 0.00004  | -2.036462 |  |
| 6119 | adenoma | CSF3R    | 0.000164 | -2.03287  |  |
| 6120 | adenoma | ANKRD13A | 0.000007 | -2.030677 |  |
| 6121 | adenoma | CLEC7A   | 0.000065 | -2.030124 |  |
| 6122 | adenoma | LAMA4    | 0.000027 | -2.027234 |  |
| 6123 | adenoma | POLR2I   | 0.001754 | -2.026762 |  |
| 6124 | adenoma | LAMP1    | 0.000831 | -2.026175 |  |
| 6125 | adenoma | OGN      | 0.000001 | -2.025852 |  |
| 6126 | adenoma | C1orf106 | 0        | -2.024221 |  |
| 6127 | adenoma | UBAP2    | 0.000536 | -2.022488 |  |
| 6128 | adenoma | BCL6     | 0.000057 | -2.021258 |  |
| 6129 | adenoma | PDK4     | 0.000152 | -2.020213 |  |
| 6130 | adenoma | GAGE1    | 0.000233 | -2.019314 |  |
| 6131 | adenoma | TSC22D3  | 0.000004 | -2.018925 |  |
| 6132 | adenoma | MUC3A    | 0.048315 | -2.013011 |  |
| 6133 | adenoma | SAMD4A   | 0.000086 | -2.010683 |  |
| 6134 | adenoma | CIAPIN1  | 0.00166  | -2.010351 |  |
| 6135 | adenoma | C1R      | 0.000035 | -2.002437 |  |
| 6136 | adenoma | CPEB3    | 0.000056 | -2.001948 |  |
| 6137 | adenoma | HSD17B11 | 0        | -2.000595 |  |
| 6138 | adenoma | C6orf105 | 0.023984 | 2.001804  |  |
| 6139 | adenoma | PDE4A    | 0.000001 | 2.004338  |  |
| 6140 | adenoma | SH3BP4   | 0.000001 | 2.007444  |  |
| 6141 | adenoma | STXBP6   | 0        | 2.00751   |  |
| 6142 | adenoma | ODC1     | 0        | 2.008864  |  |
| 6143 | adenoma | IPO7     | 0        | 2.011644  |  |
| 6144 | adenoma | RAN      | 0        | 2.014146  |  |
| 6145 | adenoma | PRMT5    | 0        | 2.015463  |  |
| 6146 | adenoma | NUDCD1   | 0        | 2.036035  |  |
| 6147 | adenoma | BID      | 0        | 2.042064  |  |
| 6148 | adenoma | ME3      | 0.000002 | 2.043797  |  |

|      |         |          |          |          |  |
|------|---------|----------|----------|----------|--|
| 6149 | adenoma | FAM84A   | 0.000001 | 2.045372 |  |
| 6150 | adenoma | CCDC113  | 0.000018 | 2.049514 |  |
| 6151 | adenoma | ATIC     | 0        | 2.054203 |  |
| 6152 | adenoma | APIP     | 0.000003 | 2.055785 |  |
| 6153 | adenoma | ADH1C    | 0.039518 | 2.076173 |  |
| 6154 | adenoma | SOX4     | 0        | 2.082992 |  |
| 6155 | adenoma | DCAF13   | 0        | 2.083548 |  |
| 6156 | adenoma | HSD11B2  | 0.016034 | 2.098063 |  |
| 6157 | adenoma | NIT2     | 0        | 2.101524 |  |
| 6158 | adenoma | DARS     | 0        | 2.104854 |  |
| 6159 | adenoma | ANKMY2   | 0.001507 | 2.10559  |  |
| 6160 | adenoma | NHP2     | 0        | 2.111937 |  |
| 6161 | adenoma | GNPAT    | 0.001005 | 2.114705 |  |
| 6162 | adenoma | VRK2     | 0.000279 | 2.115817 |  |
| 6163 | adenoma | MIF      | 0        | 2.132363 |  |
| 6164 | adenoma | FAM114A1 | 0.001468 | 2.13396  |  |
| 6165 | adenoma | RPL39    | 0.000279 | 2.151141 |  |
| 6166 | adenoma | NUP37    | 0        | 2.158289 |  |
| 6167 | adenoma | HIVEP2   | 0.000897 | 2.164829 |  |
| 6168 | adenoma | ZFP36L1  | 0.000002 | 2.168508 |  |
| 6169 | adenoma | KIAA1468 | 0.002209 | 2.169194 |  |
| 6170 | adenoma | ABCE1    | 0        | 2.173804 |  |
| 6171 | adenoma | WDR51B   | 0.000001 | 2.181121 |  |
| 6172 | adenoma | ZNF703   | 0        | 2.1845   |  |
| 6173 | adenoma | MRPS23   | 0        | 2.184607 |  |
| 6174 | adenoma | BRWD3    | 0.000279 | 2.190952 |  |
| 6175 | adenoma | NBEAL2   | 0.000001 | 2.208919 |  |
| 6176 | adenoma | STAMBPL1 | 0        | 2.216805 |  |
| 6177 | adenoma | TGIF     | 0        | 2.220626 |  |
| 6178 | adenoma | C19orf66 | 0.000953 | 2.229038 |  |
| 6179 | adenoma | ATP5C1   | 0.002218 | 2.234407 |  |
| 6180 | adenoma | C19orf45 | 0.000004 | 2.234818 |  |
| 6181 | adenoma | TMX3     | 0.000335 | 2.240365 |  |
| 6182 | adenoma | CCNG2    | 0.000397 | 2.244222 |  |
| 6183 | adenoma | TPT1     | 0.00013  | 2.24515  |  |
| 6184 | adenoma | C12orf11 | 0        | 2.245976 |  |
| 6185 | adenoma | NQO1     | 0        | 2.248091 |  |
| 6186 | adenoma | CDK4     | 0        | 2.260905 |  |
| 6187 | adenoma | HNMT     | 0.001714 | 2.267072 |  |
| 6188 | adenoma | CAPN9    | 0.002423 | 2.272972 |  |
| 6189 | adenoma | ID1      | 0        | 2.273737 |  |
| 6190 | adenoma | EEF1A1   | 0.001617 | 2.283183 |  |
| 6191 | adenoma | NOSTRIN  | 0.001005 | 2.292271 |  |
| 6192 | adenoma | CCDC123  | 0.00005  | 2.300184 |  |
| 6193 | adenoma | RPL37    | 0.000934 | 2.310832 |  |
| 6194 | adenoma | METTL11A | 0        | 2.311416 |  |
| 6195 | adenoma | TBXAS1   | 0        | 2.320069 |  |
| 6196 | adenoma | ZC3H14   | 0.000744 | 2.331669 |  |
| 6197 | adenoma | PPA1     | 0        | 2.331879 |  |
| 6198 | adenoma | SAMD5    | 0.000007 | 2.332025 |  |

|      |         |           |          |          |  |
|------|---------|-----------|----------|----------|--|
| 6199 | adenoma | CSE1L     | 0        | 2.333721 |  |
| 6200 | adenoma | QTRT1     | 0.000082 | 2.345266 |  |
| 6201 | adenoma | ZNF223    | 0.000608 | 2.348284 |  |
| 6202 | adenoma | SLC29A1   | 0.000001 | 2.350985 |  |
| 6203 | adenoma | RPL23A    | 0.001018 | 2.351467 |  |
| 6204 | adenoma | NPM1      | 0        | 2.352414 |  |
| 6205 | adenoma | MYC       | 0.000001 | 2.361317 |  |
| 6206 | adenoma | C16orf13  | 0        | 2.374332 |  |
| 6207 | adenoma | C20orf42  | 0.000001 | 2.37868  |  |
| 6208 | adenoma | CIRH1A    | 0        | 2.380956 |  |
| 6209 | adenoma | IPO4      | 0        | 2.409518 |  |
| 6210 | adenoma | PAFAH2    | 0.001886 | 2.419046 |  |
| 6211 | adenoma | NPDC1     | 0        | 2.434599 |  |
| 6212 | adenoma | MAN2B2    | 0.000685 | 2.456711 |  |
| 6213 | adenoma | MAPK10    | 0        | 2.45868  |  |
| 6214 | adenoma | B3GNT6    | 0.000551 | 2.474493 |  |
| 6215 | adenoma | TP53      | 0        | 2.480542 |  |
| 6216 | adenoma | RNF170    | 0.002228 | 2.487114 |  |
| 6217 | adenoma | CHEK1     | 0        | 2.489834 |  |
| 6218 | adenoma | CCPG1     | 0.001018 | 2.503718 |  |
| 6219 | adenoma | LOC728903 | 0.000688 | 2.508559 |  |
| 6220 | adenoma | CARD16    | 0.001537 | 2.509046 |  |
| 6221 | adenoma | TCTE3     | 0.001308 | 2.520806 |  |
| 6222 | adenoma | CKS2      | 0        | 2.538513 |  |
| 6223 | adenoma | GART      | 0        | 2.543509 |  |
| 6224 | adenoma | RNF183    | 0.000008 | 2.570806 |  |
| 6225 | adenoma | PHKA1     | 0        | 2.595054 |  |
| 6226 | adenoma | ND3       | 0.000825 | 2.602602 |  |
| 6227 | adenoma | ZNF641    | 0.000315 | 2.611286 |  |
| 6228 | adenoma | ABCC1     | 0        | 2.612634 |  |
| 6229 | adenoma | KCNN4     | 0.000001 | 2.61492  |  |
| 6230 | adenoma | PDZK1IP1  | 0.000001 | 2.634638 |  |
| 6231 | adenoma | S100A11   | 0        | 2.657114 |  |
| 6232 | adenoma | TMEM161A  | 0        | 2.677676 |  |
| 6233 | adenoma | WDR77     | 0        | 2.680779 |  |
| 6234 | adenoma | DCAF6     | 0.000189 | 2.68267  |  |
| 6235 | adenoma | TRIP11    | 0.001005 | 2.69839  |  |
| 6236 | adenoma | TLR4      | 0.000001 | 2.710705 |  |
| 6237 | adenoma | LXN       | 0.000744 | 2.719226 |  |
| 6238 | adenoma | TSPAN8    | 0.001874 | 2.723702 |  |
| 6239 | adenoma | MYOF      | 0.000937 | 2.741709 |  |
| 6240 | adenoma | SOX9      | 0        | 2.764121 |  |
| 6241 | adenoma | BYSL      | 0        | 2.771924 |  |
| 6242 | adenoma | RGPD5     | 0.001018 | 2.77218  |  |
| 6243 | adenoma | CRB2      | 0        | 2.774161 |  |
| 6244 | adenoma | STAM2     | 0.002073 | 2.777863 |  |
| 6245 | adenoma | GUSBP3    | 0.000995 | 2.782899 |  |
| 6246 | adenoma | RFK       | 0        | 2.784735 |  |
| 6247 | adenoma | MAST4     | 0.001885 | 2.785578 |  |
| 6248 | adenoma | PECAM1    | 0.000662 | 2.829075 |  |



|      |                            |              |          |            |  |
|------|----------------------------|--------------|----------|------------|--|
| 6249 | adenoma                    | ARID3A       | 0.000002 | 2.853683   |  |
| 6250 | adenoma                    | GLYATL1      | 0.004167 | 2.900595   |  |
| 6251 | adenoma                    | RGNEF        | 0        | 2.908313   |  |
| 6252 | adenoma                    | HOXA10       | 0.000013 | 2.919364   |  |
| 6253 | adenoma                    | C14orf50     | 0.000315 | 2.943752   |  |
| 6254 | adenoma                    | SELL         | 0.001054 | 2.986705   |  |
| 6255 | adenoma                    | SCIN         | 0.001803 | 3.022945   |  |
| 6256 | adenoma                    | ENC1         | 0        | 3.029091   |  |
| 6257 | adenoma                    | FLJ37644     | 0        | 3.036109   |  |
| 6258 | adenoma                    | ST6GALNAC1   | 0.000551 | 3.039416   |  |
| 6259 | adenoma                    | PNN          | 0.000004 | 3.054676   |  |
| 6260 | adenoma                    | TNNC2        | 0.005876 | 3.095065   |  |
| 6261 | adenoma                    | LOC731404    | 0        | 3.098819   |  |
| 6262 | adenoma                    | IGFBP2       | 0.000006 | 3.15496    |  |
| 6263 | adenoma                    | PGAP1        | 0.001286 | 3.165192   |  |
| 6264 | adenoma                    | LOC648541    | 0.000001 | 3.171951   |  |
| 6265 | adenoma                    | GRAMD1A      | 0        | 3.245093   |  |
| 6266 | adenoma                    | GTF2IRD1     | 0        | 3.248998   |  |
| 6267 | adenoma                    | CLIC3        | 0.000551 | 3.262252   |  |
| 6268 | adenoma                    | LOC100510507 | 0.002263 | 3.316777   |  |
| 6269 | adenoma                    | ASB4         | 0.000032 | 3.317859   |  |
| 6270 | adenoma                    | ACSM3        | 0.001699 | 3.397599   |  |
| 6271 | adenoma                    | TEAD4        | 0        | 3.449699   |  |
| 6272 | adenoma                    | PPP5C        | 0.000526 | 3.470088   |  |
| 6273 | adenoma                    | SLC12A2      | 0        | 3.496985   |  |
| 6274 | adenoma                    | GDF15        | 0        | 3.513165   |  |
| 6275 | adenoma                    | ZNF33B       | 0.000179 | 3.526628   |  |
| 6276 | adenoma                    | FOXA1        | 0.001617 | 3.654072   |  |
| 6277 | adenoma                    | ALDH1A1      | 0.000279 | 3.695608   |  |
| 6278 | adenoma                    | LOC253012    | 0.004352 | 3.719364   |  |
| 6279 | adenoma                    | CDH3         | 0        | 3.87931    |  |
| 6280 | adenoma                    | RAD54B       | 0        | 3.96964    |  |
| 6281 | adenoma                    | LYZ          | 0.000002 | 4.135976   |  |
| 6282 | adenoma                    | NFE2L3       | 0        | 4.295445   |  |
| 6283 | adenoma                    | TBX3         | 0        | 4.394285   |  |
| 6284 | adenoma                    | RETNLB       | 0.004352 | 4.671211   |  |
| 6285 | adenoma                    | SLAMF1       | 0.001573 | 4.846754   |  |
| 6286 | adenoma                    | ANKRD37      | 0.001874 | 4.910783   |  |
| 6287 | adenoma                    | DUSP4        | 0.000002 | 5.133971   |  |
| 6288 | adenoma                    | EDN1         | 0.001647 | 5.610711   |  |
| 6289 | adenoma                    | TGFBI        | 0.000001 | 5.758242   |  |
| 6290 | adenoma                    | MB           | 0.000995 | 5.842515   |  |
| 6291 | adenoma                    | OLFM4        | 0.000001 | 6.020404   |  |
| 6292 | adenoma                    | GABRB2       | 0.000551 | 6.767267   |  |
| 6293 | adenoma                    | LGR5         | 0        | 7.99232    |  |
| 6294 | adenoma                    | MMP7         | 0        | 23.740355  |  |
| 6295 | Adenoma of large intestine | GUCA2A       | 0        | -28.722896 |  |
| 6296 | Adenoma of large intestine | ABCA8        | 0        | -23.213255 |  |
| 6297 | Adenoma of large intestine | CA1          | 0        | -18.850535 |  |
| 6298 | Adenoma of large intestine | CA4          | 0        | -17.421036 |  |

|      |                            |           |   |            |  |
|------|----------------------------|-----------|---|------------|--|
| 6299 | Adenoma of large intestine | PCK1      | 0 | -16.18203  |  |
| 6300 | Adenoma of large intestine | CDKN2B    | 0 | -14.536097 |  |
| 6301 | Adenoma of large intestine | ADAMDEC1  | 0 | -12.069765 |  |
| 6302 | Adenoma of large intestine | CXCL12    | 0 | -11.210708 |  |
| 6303 | Adenoma of large intestine | EDN3      | 0 | -10.750175 |  |
| 6304 | Adenoma of large intestine | ANK2      | 0 | -9.366054  |  |
| 6305 | Adenoma of large intestine | SLC4A4    | 0 | -9.098508  |  |
| 6306 | Adenoma of large intestine | FBLN1     | 0 | -8.162717  |  |
| 6307 | Adenoma of large intestine | GDPD2     | 0 | -7.595737  |  |
| 6308 | Adenoma of large intestine | CLDN23    | 0 | -7.499048  |  |
| 6309 | Adenoma of large intestine | FXYP1     | 0 | -7.370164  |  |
| 6310 | Adenoma of large intestine | CA2       | 0 | -6.781211  |  |
| 6311 | Adenoma of large intestine | CHP2      | 0 | -6.7631    |  |
| 6312 | Adenoma of large intestine | LOC646627 | 0 | -6.74501   |  |
| 6313 | Adenoma of large intestine | SLC26A2   | 0 | -6.351358  |  |
| 6314 | Adenoma of large intestine | SEMA6D    | 0 | -6.121416  |  |
| 6315 | Adenoma of large intestine | C2orf88   | 0 | -6.019888  |  |
| 6316 | Adenoma of large intestine | PHLPP2    | 0 | -5.956011  |  |
| 6317 | Adenoma of large intestine | SCARA5    | 0 | -5.907949  |  |
| 6318 | Adenoma of large intestine | ANO5      | 0 | -5.903868  |  |
| 6319 | Adenoma of large intestine | SLC26A3   | 0 | -5.850903  |  |
| 6320 | Adenoma of large intestine | NR5A2     | 0 | -5.628608  |  |
| 6321 | Adenoma of large intestine | TSPAN7    | 0 | -5.59846   |  |
| 6322 | Adenoma of large intestine | HAPLN1    | 0 | -5.595542  |  |
| 6323 | Adenoma of large intestine | CPNE8     | 0 | -5.539105  |  |
| 6324 | Adenoma of large intestine | MEIS1     | 0 | -5.519158  |  |
| 6325 | Adenoma of large intestine | CP        | 0 | -5.496611  |  |
| 6326 | Adenoma of large intestine | ZG16      | 0 | -5.473881  |  |
| 6327 | Adenoma of large intestine | EDIL3     | 0 | -5.471718  |  |
| 6328 | Adenoma of large intestine | DPP10     | 0 | -5.255341  |  |
| 6329 | Adenoma of large intestine | LRRK2     | 0 | -5.211608  |  |
| 6330 | Adenoma of large intestine | C14orf139 | 0 | -5.19712   |  |
| 6331 | Adenoma of large intestine | PKIB      | 0 | -5.194257  |  |
| 6332 | Adenoma of large intestine | MYLK      | 0 | -5.191709  |  |
| 6333 | Adenoma of large intestine | ABI3BP    | 0 | -5.15203   |  |
| 6334 | Adenoma of large intestine | HPGD      | 0 | -4.952038  |  |
| 6335 | Adenoma of large intestine | PAG1      | 0 | -4.888206  |  |
| 6336 | Adenoma of large intestine | TMEM171   | 0 | -4.881186  |  |
| 6337 | Adenoma of large intestine | EPB41L3   | 0 | -4.876504  |  |
| 6338 | Adenoma of large intestine | DHRS11    | 0 | -4.865647  |  |
| 6339 | Adenoma of large intestine | NR3C1     | 0 | -4.840088  |  |
| 6340 | Adenoma of large intestine | ITIH5     | 0 | -4.713737  |  |
| 6341 | Adenoma of large intestine | LPAR1     | 0 | -4.679545  |  |
| 6342 | Adenoma of large intestine | CEACAM7   | 0 | -4.676861  |  |
| 6343 | Adenoma of large intestine | WSCD1     | 0 | -4.610428  |  |
| 6344 | Adenoma of large intestine | NDN       | 0 | -4.581847  |  |
| 6345 | Adenoma of large intestine | RUNDC3B   | 0 | -4.530686  |  |
| 6346 | Adenoma of large intestine | CNNM2     | 0 | -4.530382  |  |
| 6347 | Adenoma of large intestine | SETBP1    | 0 | -4.422574  |  |
| 6348 | Adenoma of large intestine | COLEC12   | 0 | -4.307452  |  |

|      |                            |           |   |           |  |
|------|----------------------------|-----------|---|-----------|--|
| 6349 | Adenoma of large intestine | RTN1      | 0 | -4.266108 |  |
| 6350 | Adenoma of large intestine | CES2      | 0 | -4.196009 |  |
| 6351 | Adenoma of large intestine | KCTD12    | 0 | -4.172007 |  |
| 6352 | Adenoma of large intestine | PDE2A     | 0 | -4.168294 |  |
| 6353 | Adenoma of large intestine | TMCC3     | 0 | -4.090314 |  |
| 6354 | Adenoma of large intestine | GPX3      | 0 | -4.07824  |  |
| 6355 | Adenoma of large intestine | SPARCL1   | 0 | -3.9365   |  |
| 6356 | Adenoma of large intestine | MEP1A     | 0 | -3.928076 |  |
| 6357 | Adenoma of large intestine | IGF1      | 0 | -3.926801 |  |
| 6358 | Adenoma of large intestine | FGF9      | 0 | -3.874986 |  |
| 6359 | Adenoma of large intestine | RGMA      | 0 | -3.847742 |  |
| 6360 | Adenoma of large intestine | SNAI2     | 0 | -3.844742 |  |
| 6361 | Adenoma of large intestine | MALL      | 0 | -3.830649 |  |
| 6362 | Adenoma of large intestine | UNC5C     | 0 | -3.802816 |  |
| 6363 | Adenoma of large intestine | MGAT4A    | 0 | -3.779783 |  |
| 6364 | Adenoma of large intestine | ARHGAP20  | 0 | -3.749217 |  |
| 6365 | Adenoma of large intestine | AQP1      | 0 | -3.717151 |  |
| 6366 | Adenoma of large intestine | IL6R      | 0 | -3.695784 |  |
| 6367 | Adenoma of large intestine | ZEB2      | 0 | -3.603844 |  |
| 6368 | Adenoma of large intestine | CCL14     | 0 | -3.57784  |  |
| 6369 | Adenoma of large intestine | IL1R2     | 0 | -3.568313 |  |
| 6370 | Adenoma of large intestine | CLIC5     | 0 | -3.536466 |  |
| 6371 | Adenoma of large intestine | NAAA      | 0 | -3.52473  |  |
| 6372 | Adenoma of large intestine | VIPR1     | 0 | -3.513648 |  |
| 6373 | Adenoma of large intestine | HIGD1A    | 0 | -3.491594 |  |
| 6374 | Adenoma of large intestine | FGL2      | 0 | -3.475052 |  |
| 6375 | Adenoma of large intestine | RUNX1T1   | 0 | -3.43287  |  |
| 6376 | Adenoma of large intestine | DCN       | 0 | -3.426964 |  |
| 6377 | Adenoma of large intestine | AHCYL2    | 0 | -3.42458  |  |
| 6378 | Adenoma of large intestine | SMPDL3A   | 0 | -3.413709 |  |
| 6379 | Adenoma of large intestine | PDE7B     | 0 | -3.311536 |  |
| 6380 | Adenoma of large intestine | MAF       | 0 | -3.308581 |  |
| 6381 | Adenoma of large intestine | POSTN     | 0 | -3.273193 |  |
| 6382 | Adenoma of large intestine | LOC401022 | 0 | -3.262621 |  |
| 6383 | Adenoma of large intestine | SEMA6A    | 0 | -3.255544 |  |
| 6384 | Adenoma of large intestine | RAB37     | 0 | -3.23089  |  |
| 6385 | Adenoma of large intestine | PRKAR2B   | 0 | -3.223903 |  |
| 6386 | Adenoma of large intestine | MS4A7     | 0 | -3.165402 |  |
| 6387 | Adenoma of large intestine | RELL1     | 0 | -3.162769 |  |
| 6388 | Adenoma of large intestine | PADI2     | 0 | -3.121707 |  |
| 6389 | Adenoma of large intestine | RCAN2     | 0 | -3.119317 |  |
| 6390 | Adenoma of large intestine | RBMS3     | 0 | -3.119037 |  |
| 6391 | Adenoma of large intestine | PLA2G10   | 0 | -3.086968 |  |
| 6392 | Adenoma of large intestine | CNRIP1    | 0 | -3.067872 |  |
| 6393 | Adenoma of large intestine | PLOD2     | 0 | -3.053873 |  |
| 6394 | Adenoma of large intestine | APPL2     | 0 | -3.042915 |  |
| 6395 | Adenoma of large intestine | LRRC19    | 0 | -3.037023 |  |
| 6396 | Adenoma of large intestine | GNB4      | 0 | -3.011228 |  |
| 6397 | Adenoma of large intestine | HDAC9     | 0 | -3.003966 |  |
| 6398 | Adenoma of large intestine | PAQR5     | 0 | -2.981438 |  |

|      |                            |          |   |           |  |
|------|----------------------------|----------|---|-----------|--|
| 6399 | Adenoma of large intestine | MATN2    | 0 | -2.980745 |  |
| 6400 | Adenoma of large intestine | CCDC68   | 0 | -2.964773 |  |
| 6401 | Adenoma of large intestine | PRDX6    | 0 | -2.956727 |  |
| 6402 | Adenoma of large intestine | DDR2     | 0 | -2.955575 |  |
| 6403 | Adenoma of large intestine | PDE5A    | 0 | -2.953031 |  |
| 6404 | Adenoma of large intestine | SLC9A9   | 0 | -2.950103 |  |
| 6405 | Adenoma of large intestine | GGTA1    | 0 | -2.9497   |  |
| 6406 | Adenoma of large intestine | TTC22    | 0 | -2.946713 |  |
| 6407 | Adenoma of large intestine | CAMK2N1  | 0 | -2.936385 |  |
| 6408 | Adenoma of large intestine | MXI1     | 0 | -2.933559 |  |
| 6409 | Adenoma of large intestine | GALNT12  | 0 | -2.885483 |  |
| 6410 | Adenoma of large intestine | SSPN     | 0 | -2.878351 |  |
| 6411 | Adenoma of large intestine | MRC1     | 0 | -2.839779 |  |
| 6412 | Adenoma of large intestine | HHIP     | 0 | -2.822572 |  |
| 6413 | Adenoma of large intestine | GLIPR2   | 0 | -2.779996 |  |
| 6414 | Adenoma of large intestine | PPP2R3A  | 0 | -2.771681 |  |
| 6415 | Adenoma of large intestine | SGCE     | 0 | -2.761216 |  |
| 6416 | Adenoma of large intestine | A2M      | 0 | -2.737539 |  |
| 6417 | Adenoma of large intestine | PDGFD    | 0 | -2.728425 |  |
| 6418 | Adenoma of large intestine | TIMP2    | 0 | -2.720069 |  |
| 6419 | Adenoma of large intestine | SYNC     | 0 | -2.707972 |  |
| 6420 | Adenoma of large intestine | PDCD4    | 0 | -2.702497 |  |
| 6421 | Adenoma of large intestine | KIAA1211 | 0 | -2.700693 |  |
| 6422 | Adenoma of large intestine | ANKRD43  | 0 | -2.694987 |  |
| 6423 | Adenoma of large intestine | AKT3     | 0 | -2.686562 |  |
| 6424 | Adenoma of large intestine | SLC46A3  | 0 | -2.685321 |  |
| 6425 | Adenoma of large intestine | MAOA     | 0 | -2.684169 |  |
| 6426 | Adenoma of large intestine | CDKL1    | 0 | -2.680807 |  |
| 6427 | Adenoma of large intestine | SGK2     | 0 | -2.680358 |  |
| 6428 | Adenoma of large intestine | ZCCHC24  | 0 | -2.660645 |  |
| 6429 | Adenoma of large intestine | SLC30A4  | 0 | -2.646617 |  |
| 6430 | Adenoma of large intestine | RGL1     | 0 | -2.64603  |  |
| 6431 | Adenoma of large intestine | PPAP2A   | 0 | -2.635656 |  |
| 6432 | Adenoma of large intestine | C6orf204 | 0 | -2.60794  |  |
| 6433 | Adenoma of large intestine | SRI      | 0 | -2.591347 |  |
| 6434 | Adenoma of large intestine | ATP5S    | 0 | -2.576273 |  |
| 6435 | Adenoma of large intestine | SSBP2    | 0 | -2.561707 |  |
| 6436 | Adenoma of large intestine | FNBP1    | 0 | -2.557199 |  |
| 6437 | Adenoma of large intestine | PTPRH    | 0 | -2.546098 |  |
| 6438 | Adenoma of large intestine | METTL7A  | 0 | -2.536472 |  |
| 6439 | Adenoma of large intestine | KLF4     | 0 | -2.531525 |  |
| 6440 | Adenoma of large intestine | PLCL2    | 0 | -2.528678 |  |
| 6441 | Adenoma of large intestine | NR3C2    | 0 | -2.508277 |  |
| 6442 | Adenoma of large intestine | ANTXR1   | 0 | -2.49782  |  |
| 6443 | Adenoma of large intestine | ADCY9    | 0 | -2.496971 |  |
| 6444 | Adenoma of large intestine | PTPLAD2  | 0 | -2.488703 |  |
| 6445 | Adenoma of large intestine | PGCP     | 0 | -2.464507 |  |
| 6446 | Adenoma of large intestine | ITM2C    | 0 | -2.45619  |  |
| 6447 | Adenoma of large intestine | IGSF3    | 0 | -2.449265 |  |
| 6448 | Adenoma of large intestine | HNF4A    | 0 | -2.448363 |  |

|      |                            |              |   |           |  |
|------|----------------------------|--------------|---|-----------|--|
| 6449 | Adenoma of large intestine | CERK         | 0 | -2.432117 |  |
| 6450 | Adenoma of large intestine | GNA11        | 0 | -2.408995 |  |
| 6451 | Adenoma of large intestine | FTH1         | 0 | -2.404593 |  |
| 6452 | Adenoma of large intestine | CA12         | 0 | -2.396817 |  |
| 6453 | Adenoma of large intestine | ACAT1        | 0 | -2.391491 |  |
| 6454 | Adenoma of large intestine | LOC100133660 | 0 | -2.389821 |  |
| 6455 | Adenoma of large intestine | NHSL1        | 0 | -2.387015 |  |
| 6456 | Adenoma of large intestine | BCL2L11      | 0 | -2.372495 |  |
| 6457 | Adenoma of large intestine | SLC2A13      | 0 | -2.35371  |  |
| 6458 | Adenoma of large intestine | RMND5A       | 0 | -2.349248 |  |
| 6459 | Adenoma of large intestine | AAK1         | 0 | -2.345226 |  |
| 6460 | Adenoma of large intestine | FMO5         | 0 | -2.34472  |  |
| 6461 | Adenoma of large intestine | VIM          | 0 | -2.336821 |  |
| 6462 | Adenoma of large intestine | NCRNA00294   | 0 | -2.329114 |  |
| 6463 | Adenoma of large intestine | CLMN         | 0 | -2.326686 |  |
| 6464 | Adenoma of large intestine | TMEM133      | 0 | -2.318497 |  |
| 6465 | Adenoma of large intestine | GNG7         | 0 | -2.304948 |  |
| 6466 | Adenoma of large intestine | SH2B3        | 0 | -2.278978 |  |
| 6467 | Adenoma of large intestine | GLTP         | 0 | -2.27136  |  |
| 6468 | Adenoma of large intestine | SLC31A2      | 0 | -2.267722 |  |
| 6469 | Adenoma of large intestine | RETSAT       | 0 | -2.248071 |  |
| 6470 | Adenoma of large intestine | SLC25A23     | 0 | -2.247985 |  |
| 6471 | Adenoma of large intestine | STRADB       | 0 | -2.243845 |  |
| 6472 | Adenoma of large intestine | GLOD5        | 0 | -2.212898 |  |
| 6473 | Adenoma of large intestine | CYLD         | 0 | -2.180294 |  |
| 6474 | Adenoma of large intestine | UGP2         | 0 | -2.178624 |  |
| 6475 | Adenoma of large intestine | NEURL1B      | 0 | -2.170687 |  |
| 6476 | Adenoma of large intestine | ACSS2        | 0 | -2.168338 |  |
| 6477 | Adenoma of large intestine | PLCE1        | 0 | -2.168136 |  |
| 6478 | Adenoma of large intestine | AGXT2L2      | 0 | -2.153903 |  |
| 6479 | Adenoma of large intestine | CCL14-CCL15  | 0 | -2.142142 |  |
| 6480 | Adenoma of large intestine | KLF9         | 0 | -2.141047 |  |
| 6481 | Adenoma of large intestine | AKAP9        | 0 | -2.135119 |  |
| 6482 | Adenoma of large intestine | TMEM45B      | 0 | -2.125697 |  |
| 6483 | Adenoma of large intestine | C5orf30      | 0 | -2.122045 |  |
| 6484 | Adenoma of large intestine | MYO1A        | 0 | -2.121306 |  |
| 6485 | Adenoma of large intestine | KAT2B        | 0 | -2.114163 |  |
| 6486 | Adenoma of large intestine | EEF2K        | 0 | -2.085721 |  |
| 6487 | Adenoma of large intestine | ZZEF1        | 0 | -2.079989 |  |
| 6488 | Adenoma of large intestine | MARCKS       | 0 | -2.070555 |  |
| 6489 | Adenoma of large intestine | SLC41A2      | 0 | -2.06901  |  |
| 6490 | Adenoma of large intestine | KIAA1161     | 0 | -2.053903 |  |
| 6491 | Adenoma of large intestine | TMEM170A     | 0 | -2.050047 |  |
| 6492 | Adenoma of large intestine | CTSA         | 0 | -2.047801 |  |
| 6493 | Adenoma of large intestine | C1orf106     | 0 | -2.024221 |  |
| 6494 | Adenoma of large intestine | HSD17B11     | 0 | -2.000595 |  |
| 6495 | Adenoma of large intestine | IPO7         | 0 | 2.011644  |  |
| 6496 | Adenoma of large intestine | RAN          | 0 | 2.014146  |  |
| 6497 | Adenoma of large intestine | PRMT5        | 0 | 2.015463  |  |
| 6498 | Adenoma of large intestine | NUDCD1       | 0 | 2.036035  |  |

|      |                            |          |          |           |  |
|------|----------------------------|----------|----------|-----------|--|
| 6499 | Adenoma of large intestine | BID      | 0        | 2.042064  |  |
| 6500 | Adenoma of large intestine | ATIC     | 0        | 2.054203  |  |
| 6501 | Adenoma of large intestine | DCAF13   | 0        | 2.083548  |  |
| 6502 | Adenoma of large intestine | NIT2     | 0        | 2.101524  |  |
| 6503 | Adenoma of large intestine | DKC1     | 0        | 2.10166   |  |
| 6504 | Adenoma of large intestine | DARS     | 0        | 2.104854  |  |
| 6505 | Adenoma of large intestine | GPX2     | 0        | 2.105398  |  |
| 6506 | Adenoma of large intestine | NHP2     | 0        | 2.111937  |  |
| 6507 | Adenoma of large intestine | MIF      | 0        | 2.132363  |  |
| 6508 | Adenoma of large intestine | NUP37    | 0        | 2.158289  |  |
| 6509 | Adenoma of large intestine | ABCE1    | 0        | 2.173804  |  |
| 6510 | Adenoma of large intestine | ZNF703   | 0        | 2.1845    |  |
| 6511 | Adenoma of large intestine | MRPS23   | 0        | 2.184607  |  |
| 6512 | Adenoma of large intestine | STAMBPL1 | 0        | 2.216805  |  |
| 6513 | Adenoma of large intestine | C12orf11 | 0        | 2.245976  |  |
| 6514 | Adenoma of large intestine | CDK4     | 0        | 2.260905  |  |
| 6515 | Adenoma of large intestine | ID1      | 0        | 2.273737  |  |
| 6516 | Adenoma of large intestine | METTL11A | 0        | 2.311416  |  |
| 6517 | Adenoma of large intestine | PPA1     | 0        | 2.331879  |  |
| 6518 | Adenoma of large intestine | CSE1L    | 0        | 2.333721  |  |
| 6519 | Adenoma of large intestine | NPM1     | 0        | 2.352414  |  |
| 6520 | Adenoma of large intestine | C16orf13 | 0        | 2.374332  |  |
| 6521 | Adenoma of large intestine | CIRH1A   | 0        | 2.380956  |  |
| 6522 | Adenoma of large intestine | IPO4     | 0        | 2.409518  |  |
| 6523 | Adenoma of large intestine | ITGA6    | 0        | 2.419872  |  |
| 6524 | Adenoma of large intestine | CHEK1    | 0        | 2.489834  |  |
| 6525 | Adenoma of large intestine | CKS2     | 0        | 2.538513  |  |
| 6526 | Adenoma of large intestine | GART     | 0        | 2.543509  |  |
| 6527 | Adenoma of large intestine | PHKA1    | 0        | 2.595054  |  |
| 6528 | Adenoma of large intestine | FERMT1   | 0        | 2.605975  |  |
| 6529 | Adenoma of large intestine | ABCC1    | 0        | 2.612634  |  |
| 6530 | Adenoma of large intestine | TMEM161A | 0        | 2.677676  |  |
| 6531 | Adenoma of large intestine | WDR77    | 0        | 2.680779  |  |
| 6532 | Adenoma of large intestine | BYSL     | 0        | 2.771924  |  |
| 6533 | Adenoma of large intestine | ENC1     | 0        | 3.029091  |  |
| 6534 | Adenoma of large intestine | GTF2IRD1 | 0        | 3.248998  |  |
| 6535 | Adenoma of large intestine | MET      | 0        | 3.407449  |  |
| 6536 | Adenoma of large intestine | NEBL     | 0        | 3.427539  |  |
| 6537 | Adenoma of large intestine | TEAD4    | 0        | 3.449699  |  |
| 6538 | Adenoma of large intestine | ANXA3    | 0        | 3.510112  |  |
| 6539 | Adenoma of large intestine | RNF43    | 0        | 3.789269  |  |
| 6540 | Adenoma of large intestine | RAD54B   | 0        | 3.96964   |  |
| 6541 | Adenoma of large intestine | SORD     | 0        | 3.981631  |  |
| 6542 | Adenoma of large intestine | NFE2L3   | 0        | 4.295445  |  |
| 6543 | Adenoma of large intestine | CD44     | 0        | 4.366169  |  |
| 6544 | Adenoma of large intestine | S100P    | 0        | 4.459644  |  |
| 6545 | Adenoma of large intestine | GALNT6   | 0        | 5.744695  |  |
| 6546 | Adenoma of large intestine | AXIN2    | 0        | 6.490564  |  |
| 6547 | Adenoma, Villous           | SAA1     | 0.00016  | -9.645666 |  |
| 6548 | Adenoma, Villous           | MAGEA3   | 0.000022 | -8.032836 |  |

|      |                  |              |          |           |  |
|------|------------------|--------------|----------|-----------|--|
| 6549 | Adenoma, Villous | MAGEA6       | 0.00001  | -7.748368 |  |
| 6550 | Adenoma, Villous | GPR109B      | 0        | -6.520218 |  |
| 6551 | Adenoma, Villous | CXCL5        | 0        | -4.838213 |  |
| 6552 | Adenoma, Villous | SERPINE1     | 0        | -4.593549 |  |
| 6553 | Adenoma, Villous | AQP9         | 0.000002 | -4.184974 |  |
| 6554 | Adenoma, Villous | H19          | 0.000013 | -4.174771 |  |
| 6555 | Adenoma, Villous | MAGEA2       | 0.000008 | -3.948847 |  |
| 6556 | Adenoma, Villous | CDH2         | 0        | -3.829926 |  |
| 6557 | Adenoma, Villous | MAGEA12      | 0.000002 | -3.774247 |  |
| 6558 | Adenoma, Villous | CYP1B1       | 0.000036 | -3.743165 |  |
| 6559 | Adenoma, Villous | SOD2         | 0        | -3.701291 |  |
| 6560 | Adenoma, Villous | BCHE         | 0.000066 | -3.695978 |  |
| 6561 | Adenoma, Villous | COMP         | 0.000063 | -3.625885 |  |
| 6562 | Adenoma, Villous | C2orf40      | 0.000056 | -3.580672 |  |
| 6563 | Adenoma, Villous | GAS1         | 0.000002 | -3.452579 |  |
| 6564 | Adenoma, Villous | CD300A       | 0.000001 | -3.383942 |  |
| 6565 | Adenoma, Villous | S100A8       | 0.000001 | -3.352349 |  |
| 6566 | Adenoma, Villous | LOC100506621 | 0.000005 | -3.233709 |  |
| 6567 | Adenoma, Villous | KCNIP2       | 0.000042 | -3.119855 |  |
| 6568 | Adenoma, Villous | HTR2B        | 0.000205 | -3.10838  |  |
| 6569 | Adenoma, Villous | CCL18        | 0.000032 | -3.10227  |  |
| 6570 | Adenoma, Villous | DES          | 0.000264 | -3.063024 |  |
| 6571 | Adenoma, Villous | HSD11B1      | 0.000217 | -3.061173 |  |
| 6572 | Adenoma, Villous | C5orf46      | 0.000007 | -3.04792  |  |
| 6573 | Adenoma, Villous | TNFAIP6      | 0        | -3.046939 |  |
| 6574 | Adenoma, Villous | BCAT1        | 0.000001 | -3.015072 |  |
| 6575 | Adenoma, Villous | FAM20A       | 0.000019 | -2.998583 |  |
| 6576 | Adenoma, Villous | PROK2        | 0.0001   | -2.985051 |  |
| 6577 | Adenoma, Villous | NNMT         | 0.00001  | -2.951044 |  |
| 6578 | Adenoma, Villous | ISM1         | 0        | -2.933199 |  |
| 6579 | Adenoma, Villous | C13orf15     | 0        | -2.90779  |  |
| 6580 | Adenoma, Villous | BCL2A1       | 0.000003 | -2.90518  |  |
| 6581 | Adenoma, Villous | BAHCC1       | 0.000001 | -2.897976 |  |
| 6582 | Adenoma, Villous | CNN1         | 0.000235 | -2.885419 |  |
| 6583 | Adenoma, Villous | IQCA1        | 0.000001 | -2.880315 |  |
| 6584 | Adenoma, Villous | CFH          | 0.000006 | -2.86537  |  |
| 6585 | Adenoma, Villous | APOE         | 0.000001 | -2.846108 |  |
| 6586 | Adenoma, Villous | LOC645323    | 0.000025 | -2.839439 |  |
| 6587 | Adenoma, Villous | IL6          | 0.000005 | -2.827798 |  |
| 6588 | Adenoma, Villous | HAS1         | 0.000008 | -2.816339 |  |
| 6589 | Adenoma, Villous | C20orf103    | 0.000006 | -2.775791 |  |
| 6590 | Adenoma, Villous | LCP2         | 0.000001 | -2.756829 |  |
| 6591 | Adenoma, Villous | PDGFRL       | 0.000134 | -2.755988 |  |
| 6592 | Adenoma, Villous | RBPMS2       | 0.000012 | -2.716139 |  |
| 6593 | Adenoma, Villous | FCGR3B       | 0.000001 | -2.715186 |  |
| 6594 | Adenoma, Villous | MMP23A       | 0        | -2.689529 |  |
| 6595 | Adenoma, Villous | PRELP        | 0.000259 | -2.66053  |  |
| 6596 | Adenoma, Villous | FLJ13744     | 0.000006 | -2.603456 |  |
| 6597 | Adenoma, Villous | POSTN        | 0.000006 | -2.598065 |  |
| 6598 | Adenoma, Villous | DPYSL3       | 0.000011 | -2.593683 |  |

|      |                  |              |          |           |  |
|------|------------------|--------------|----------|-----------|--|
| 6599 | Adenoma, Villous | MYLK         | 0.000003 | -2.57498  |  |
| 6600 | Adenoma, Villous | NACAD        | 0        | -2.55511  |  |
| 6601 | Adenoma, Villous | COL1A2       | 0.000056 | -2.549058 |  |
| 6602 | Adenoma, Villous | IL1RN        | 0.000005 | -2.545738 |  |
| 6603 | Adenoma, Villous | COL10A1      | 0.000076 | -2.543026 |  |
| 6604 | Adenoma, Villous | TWIST1       | 0        | -2.542915 |  |
| 6605 | Adenoma, Villous | REXO1        | 0.000011 | -2.536593 |  |
| 6606 | Adenoma, Villous | FPR1         | 0.000001 | -2.518758 |  |
| 6607 | Adenoma, Villous | LOC388796    | 0.000087 | -2.504446 |  |
| 6608 | Adenoma, Villous | PTGIS        | 0.000007 | -2.490377 |  |
| 6609 | Adenoma, Villous | PDLIM3       | 0.000001 | -2.484118 |  |
| 6610 | Adenoma, Villous | CACNG1       | 0        | -2.483709 |  |
| 6611 | Adenoma, Villous | RUNX2        | 0.000176 | -2.470737 |  |
| 6612 | Adenoma, Villous | LOC100506941 | 0.000211 | -2.466491 |  |
| 6613 | Adenoma, Villous | PTGS2        | 0.000015 | -2.437461 |  |
| 6614 | Adenoma, Villous | BGN          | 0.000009 | -2.436523 |  |
| 6615 | Adenoma, Villous | ANGPTL4      | 0.000032 | -2.435153 |  |
| 6616 | Adenoma, Villous | CD163        | 0.000005 | -2.433077 |  |
| 6617 | Adenoma, Villous | GJC1         | 0.00003  | -2.430532 |  |
| 6618 | Adenoma, Villous | NAMPT        | 0.000001 | -2.429104 |  |
| 6619 | Adenoma, Villous | NRK          | 0.000002 | -2.420558 |  |
| 6620 | Adenoma, Villous | AGTR1        | 0.000014 | -2.417771 |  |
| 6621 | Adenoma, Villous | SLIT2        | 0        | -2.388864 |  |
| 6622 | Adenoma, Villous | AEBP1        | 0.000161 | -2.388711 |  |
| 6623 | Adenoma, Villous | SYNPO2       | 0.000116 | -2.386825 |  |
| 6624 | Adenoma, Villous | CHI3L1       | 0.00012  | -2.381957 |  |
| 6625 | Adenoma, Villous | AGTR2        | 0.000004 | -2.37389  |  |
| 6626 | Adenoma, Villous | ITGBL1       | 0.000011 | -2.373081 |  |
| 6627 | Adenoma, Villous | FOXC1        | 0.00015  | -2.36447  |  |
| 6628 | Adenoma, Villous | EGR4         | 0.000011 | -2.344928 |  |
| 6629 | Adenoma, Villous | SOCS3        | 0.000008 | -2.329779 |  |
| 6630 | Adenoma, Villous | COPZ2        | 0.000012 | -2.324949 |  |
| 6631 | Adenoma, Villous | COL11A1      | 0.000058 | -2.320574 |  |
| 6632 | Adenoma, Villous | FBXO17       | 0.000111 | -2.317715 |  |
| 6633 | Adenoma, Villous | CYR61        | 0.000231 | -2.314814 |  |
| 6634 | Adenoma, Villous | ANTXR1       | 0.000156 | -2.309902 |  |
| 6635 | Adenoma, Villous | PAPPA        | 0.000133 | -2.308965 |  |
| 6636 | Adenoma, Villous | VSTM2L       | 0.000002 | -2.307386 |  |
| 6637 | Adenoma, Villous | LOX          | 0.000121 | -2.30601  |  |
| 6638 | Adenoma, Villous | PLAC4        | 0.000031 | -2.303985 |  |
| 6639 | Adenoma, Villous | CCL3         | 0.000005 | -2.302453 |  |
| 6640 | Adenoma, Villous | APOLD1       | 0.000012 | -2.298628 |  |
| 6641 | Adenoma, Villous | RGS4         | 0.000044 | -2.294983 |  |
| 6642 | Adenoma, Villous | INHBA        | 0.000049 | -2.294081 |  |
| 6643 | Adenoma, Villous | CMKLR1       | 0.000252 | -2.293257 |  |
| 6644 | Adenoma, Villous | EGFR         | 0.000217 | -2.287943 |  |
| 6645 | Adenoma, Villous | KCP          | 0.000043 | -2.281315 |  |
| 6646 | Adenoma, Villous | FAM129A      | 0        | -2.273048 |  |
| 6647 | Adenoma, Villous | PTX3         | 0.000036 | -2.267174 |  |
| 6648 | Adenoma, Villous | ZFPM2        | 0.000152 | -2.264309 |  |



|      |                  |              |          |           |  |
|------|------------------|--------------|----------|-----------|--|
| 6649 | Adenoma, Villous | MEIS1        | 0.000027 | -2.261566 |  |
| 6650 | Adenoma, Villous | PDLIM4       | 0        | -2.260782 |  |
| 6651 | Adenoma, Villous | CR1          | 0        | -2.252357 |  |
| 6652 | Adenoma, Villous | SERPING1     | 0.00012  | -2.235442 |  |
| 6653 | Adenoma, Villous | PNMAL1       | 0.000007 | -2.234743 |  |
| 6654 | Adenoma, Villous | FNDC4        | 0.000031 | -2.233419 |  |
| 6655 | Adenoma, Villous | TNS1         | 0.000193 | -2.232016 |  |
| 6656 | Adenoma, Villous | IL27RA       | 0.000041 | -2.23143  |  |
| 6657 | Adenoma, Villous | TAGLN        | 0.000196 | -2.227987 |  |
| 6658 | Adenoma, Villous | COL12A1      | 0.000002 | -2.227158 |  |
| 6659 | Adenoma, Villous | GFPT2        | 0.000196 | -2.225548 |  |
| 6660 | Adenoma, Villous | ABCA6        | 0.000186 | -2.222895 |  |
| 6661 | Adenoma, Villous | LOC100507165 | 0.000001 | -2.214475 |  |
| 6662 | Adenoma, Villous | CRLF1        | 0.000157 | -2.214226 |  |
| 6663 | Adenoma, Villous | SLC1A3       | 0.000003 | -2.213189 |  |
| 6664 | Adenoma, Villous | FAM107A      | 0.000189 | -2.210349 |  |
| 6665 | Adenoma, Villous | MAGED4       | 0        | -2.208615 |  |
| 6666 | Adenoma, Villous | CSF3         | 0.000005 | -2.207    |  |
| 6667 | Adenoma, Villous | CCL4         | 0        | -2.204871 |  |
| 6668 | Adenoma, Villous | RUNX3        | 0.000003 | -2.204119 |  |
| 6669 | Adenoma, Villous | MEG3         | 0.000017 | -2.201433 |  |
| 6670 | Adenoma, Villous | ADAMTS1      | 0.000128 | -2.201077 |  |
| 6671 | Adenoma, Villous | GADD45B      | 0.000001 | -2.199071 |  |
| 6672 | Adenoma, Villous | SNAP25       | 0.00003  | -2.19496  |  |
| 6673 | Adenoma, Villous | CILP2        | 0.000112 | -2.193145 |  |
| 6674 | Adenoma, Villous | NPR1         | 0.000101 | -2.192109 |  |
| 6675 | Adenoma, Villous | C11orf96     | 0.000186 | -2.192061 |  |
| 6676 | Adenoma, Villous | SLC16A7      | 0.000049 | -2.185442 |  |
| 6677 | Adenoma, Villous | FST          | 0.000004 | -2.184259 |  |
| 6678 | Adenoma, Villous | TBCD         | 0.000002 | -2.181333 |  |
| 6679 | Adenoma, Villous | AMOTL1       | 0.000013 | -2.173702 |  |
| 6680 | Adenoma, Villous | CYS1         | 0.000098 | -2.164214 |  |
| 6681 | Adenoma, Villous | PLCXD3       | 0.000162 | -2.161158 |  |
| 6682 | Adenoma, Villous | RARRES2      | 0.000071 | -2.157    |  |
| 6683 | Adenoma, Villous | SPESP1       | 0.000006 | -2.154017 |  |
| 6684 | Adenoma, Villous | ITGA5        | 0.000006 | -2.152342 |  |
| 6685 | Adenoma, Villous | HSPA6        | 0.000025 | -2.143799 |  |
| 6686 | Adenoma, Villous | FMO1         | 0        | -2.143737 |  |
| 6687 | Adenoma, Villous | PDGFRA       | 0.000061 | -2.140299 |  |
| 6688 | Adenoma, Villous | MMP19        | 0        | -2.137628 |  |
| 6689 | Adenoma, Villous | MAGEA4       | 0.000103 | -2.136    |  |
| 6690 | Adenoma, Villous | PLIN5        | 0.000025 | -2.132731 |  |
| 6691 | Adenoma, Villous | C19orf59     | 0.000056 | -2.130184 |  |
| 6692 | Adenoma, Villous | COL5A2       | 0.000219 | -2.129854 |  |
| 6693 | Adenoma, Villous | CCDC80       | 0.000019 | -2.125219 |  |
| 6694 | Adenoma, Villous | HTRA1        | 0.000003 | -2.110659 |  |
| 6695 | Adenoma, Villous | TMEM45A      | 0.000253 | -2.108061 |  |
| 6696 | Adenoma, Villous | UCHL1        | 0.000017 | -2.107934 |  |
| 6697 | Adenoma, Villous | PLEK         | 0.000007 | -2.10009  |  |
| 6698 | Adenoma, Villous | CLEC2B       | 0.000009 | -2.096686 |  |

|      |                        |          |          |           |  |
|------|------------------------|----------|----------|-----------|--|
| 6699 | Adenoma, Villous       | DUSP1    | 0.000027 | -2.094565 |  |
| 6700 | Adenoma, Villous       | BASP1    | 0.000003 | -2.092224 |  |
| 6701 | Adenoma, Villous       | SRGN     | 0.000058 | -2.092168 |  |
| 6702 | Adenoma, Villous       | SORCS2   | 0.000131 | -2.088112 |  |
| 6703 | Adenoma, Villous       | TNC      | 0.000004 | -2.086421 |  |
| 6704 | Adenoma, Villous       | ANKRD6   | 0.000012 | -2.085973 |  |
| 6705 | Adenoma, Villous       | ERBB4    | 0.000028 | -2.082636 |  |
| 6706 | Adenoma, Villous       | GEM      | 0.000202 | -2.082297 |  |
| 6707 | Adenoma, Villous       | ZNF331   | 0.000008 | -2.076409 |  |
| 6708 | Adenoma, Villous       | SDPR     | 0.000164 | -2.07585  |  |
| 6709 | Adenoma, Villous       | KIAA0495 | 0.000042 | -2.074599 |  |
| 6710 | Adenoma, Villous       | CD33     | 0.000014 | -2.066985 |  |
| 6711 | Adenoma, Villous       | PRRG3    | 0.000241 | -2.063196 |  |
| 6712 | Adenoma, Villous       | KMO      | 0.000103 | -2.06096  |  |
| 6713 | Adenoma, Villous       | ADAMTS5  | 0.000002 | -2.057966 |  |
| 6714 | Adenoma, Villous       | SGK1     | 0.00007  | -2.057487 |  |
| 6715 | Adenoma, Villous       | NXN      | 0.000157 | -2.057025 |  |
| 6716 | Adenoma, Villous       | FAM69B   | 0.000183 | -2.056589 |  |
| 6717 | Adenoma, Villous       | DDR2     | 0.000006 | -2.040428 |  |
| 6718 | Adenoma, Villous       | MAGEL2   | 0.000183 | -2.039831 |  |
| 6719 | Adenoma, Villous       | HBE1     | 0.00004  | -2.036462 |  |
| 6720 | Adenoma, Villous       | FERMT2   | 0.000147 | -2.035527 |  |
| 6721 | Adenoma, Villous       | CSF3R    | 0.000164 | -2.03287  |  |
| 6722 | Adenoma, Villous       | CLEC7A   | 0.000065 | -2.030124 |  |
| 6723 | Adenoma, Villous       | FN1      | 0        | -2.022209 |  |
| 6724 | Adenoma, Villous       | BCL6     | 0.000057 | -2.021258 |  |
| 6725 | Adenoma, Villous       | PDK4     | 0.000152 | -2.020213 |  |
| 6726 | Adenoma, Villous       | GAGE1    | 0.000233 | -2.019314 |  |
| 6727 | Adenoma, Villous       | TIMP3    | 0.000002 | -2.018156 |  |
| 6728 | Adenoma, Villous       | SAMD4A   | 0.000086 | -2.010683 |  |
| 6729 | Adenoma, Villous       | C1R      | 0.000035 | -2.002437 |  |
| 6730 | Analysis of substances | ARHGEF35 | 0        | -7.488002 |  |
| 6731 | Analysis of substances | EXTL2    | 0        | -5.523496 |  |
| 6732 | Analysis of substances | LAYN     | 0        | -5.380104 |  |
| 6733 | Analysis of substances | COCH     | 0        | -4.365475 |  |
| 6734 | Analysis of substances | F2RL2    | 0        | -4.358104 |  |
| 6735 | Analysis of substances | FOLR2    | 0        | -4.354878 |  |
| 6736 | Analysis of substances | OLFML1   | 0        | -4.210707 |  |
| 6737 | Analysis of substances | ADAM22   | 0        | -4.146953 |  |
| 6738 | Analysis of substances | APOBEC3G | 0        | -3.994392 |  |
| 6739 | Analysis of substances | CD209    | 0        | -3.810027 |  |
| 6740 | Analysis of substances | ARL6     | 0        | -3.805882 |  |
| 6741 | Analysis of substances | ARSK     | 0        | -3.787382 |  |
| 6742 | Analysis of substances | FAM98B   | 0        | -3.784455 |  |
| 6743 | Analysis of substances | DUSP19   | 0        | -3.783262 |  |
| 6744 | Analysis of substances | CACNA2D1 | 0        | -3.776128 |  |
| 6745 | Analysis of substances | GLMN     | 0        | -3.7706   |  |
| 6746 | Analysis of substances | FAM38B   | 0        | -3.68497  |  |
| 6747 | Analysis of substances | PART1    | 0        | -3.476514 |  |
| 6748 | Analysis of substances | NUDCD2   | 0        | -3.462796 |  |

|      |                        |          |   |           |  |
|------|------------------------|----------|---|-----------|--|
| 6749 | Analysis of substances | DMRT2    | 0 | -3.445976 |  |
| 6750 | Analysis of substances | ERI1     | 0 | -3.412467 |  |
| 6751 | Analysis of substances | NCAM2    | 0 | -3.409691 |  |
| 6752 | Analysis of substances | ADAMTS5  | 0 | -3.320862 |  |
| 6753 | Analysis of substances | SSX2IP   | 0 | -3.293521 |  |
| 6754 | Analysis of substances | ZMYM1    | 0 | -3.175626 |  |
| 6755 | Analysis of substances | AFAP1-AS | 0 | -3.158008 |  |
| 6756 | Analysis of substances | ARSB     | 0 | -3.157866 |  |
| 6757 | Analysis of substances | STK33    | 0 | -3.15434  |  |
| 6758 | Analysis of substances | LRCH2    | 0 | -3.13753  |  |
| 6759 | Analysis of substances | ELAC1    | 0 | -3.133587 |  |
| 6760 | Analysis of substances | C2orf3   | 0 | -3.119606 |  |
| 6761 | Analysis of substances | KLHL4    | 0 | -3.115538 |  |
| 6762 | Analysis of substances | NEGR1    | 0 | -3.109224 |  |
| 6763 | Analysis of substances | TMEM217  | 0 | -3.058297 |  |
| 6764 | Analysis of substances | JAZF1    | 0 | -3.055828 |  |
| 6765 | Analysis of substances | GABRB2   | 0 | -3.038167 |  |
| 6766 | Analysis of substances | CDH13    | 0 | -3.037865 |  |
| 6767 | Analysis of substances | FLRT2    | 0 | -2.998259 |  |
| 6768 | Analysis of substances | SCRN3    | 0 | -2.975479 |  |
| 6769 | Analysis of substances | IFT81    | 0 | -2.948432 |  |
| 6770 | Analysis of substances | SNTB2    | 0 | -2.933168 |  |
| 6771 | Analysis of substances | NIPAL3   | 0 | -2.928013 |  |
| 6772 | Analysis of substances | EFCAB7   | 0 | -2.910264 |  |
| 6773 | Analysis of substances | TIAM1    | 0 | -2.890659 |  |
| 6774 | Analysis of substances | ALS2CR4  | 0 | -2.845566 |  |
| 6775 | Analysis of substances | NEK11    | 0 | -2.807794 |  |
| 6776 | Analysis of substances | POPDC2   | 0 | -2.773582 |  |
| 6777 | Analysis of substances | ARMCX2   | 0 | -2.749416 |  |
| 6778 | Analysis of substances | L2HGDH   | 0 | -2.740655 |  |
| 6779 | Analysis of substances | ENPEP    | 0 | -2.720477 |  |
| 6780 | Analysis of substances | ANKRD29  | 0 | -2.705061 |  |
| 6781 | Analysis of substances | ZNF568   | 0 | -2.70436  |  |
| 6782 | Analysis of substances | CSTA     | 0 | -2.695119 |  |
| 6783 | Analysis of substances | NLGN4X   | 0 | -2.688744 |  |
| 6784 | Analysis of substances | ADIPOQ   | 0 | -2.688394 |  |
| 6785 | Analysis of substances | CLCN4    | 0 | -2.680616 |  |
| 6786 | Analysis of substances | PRR16    | 0 | -2.671408 |  |
| 6787 | Analysis of substances | AMOTL1   | 0 | -2.637285 |  |
| 6788 | Analysis of substances | SV2B     | 0 | -2.627161 |  |
| 6789 | Analysis of substances | BFSP1    | 0 | -2.624916 |  |
| 6790 | Analysis of substances | PEG10    | 0 | -2.613561 |  |
| 6791 | Analysis of substances | AVEN     | 0 | -2.608917 |  |
| 6792 | Analysis of substances | FAM13C   | 0 | -2.593055 |  |
| 6793 | Analysis of substances | LETM2    | 0 | -2.571902 |  |
| 6794 | Analysis of substances | SLC16A2  | 0 | -2.564288 |  |
| 6795 | Analysis of substances | DDX53    | 0 | -2.541946 |  |
| 6796 | Analysis of substances | USE1     | 0 | -2.501124 |  |
| 6797 | Analysis of substances | SEMA7A   | 0 | -2.49877  |  |
| 6798 | Analysis of substances | CD226    | 0 | -2.490584 |  |

|      |                        |          |   |           |  |
|------|------------------------|----------|---|-----------|--|
| 6799 | Analysis of substances | IL12RB2  | 0 | -2.478854 |  |
| 6800 | Analysis of substances | CPB1     | 0 | -2.476549 |  |
| 6801 | Analysis of substances | ZNF323   | 0 | -2.438389 |  |
| 6802 | Analysis of substances | SLC7A2   | 0 | -2.437702 |  |
| 6803 | Analysis of substances | LUZP1    | 0 | -2.416945 |  |
| 6804 | Analysis of substances | DIO1     | 0 | -2.414962 |  |
| 6805 | Analysis of substances | TRHDE    | 0 | -2.406423 |  |
| 6806 | Analysis of substances | NALCN    | 0 | -2.405892 |  |
| 6807 | Analysis of substances | BMX      | 0 | -2.404528 |  |
| 6808 | Analysis of substances | C6orf168 | 0 | -2.401093 |  |
| 6809 | Analysis of substances | ANK2     | 0 | -2.400795 |  |
| 6810 | Analysis of substances | RGL1     | 0 | -2.39065  |  |
| 6811 | Analysis of substances | PDZRN4   | 0 | -2.383322 |  |
| 6812 | Analysis of substances | DMGDH    | 0 | -2.363053 |  |
| 6813 | Analysis of substances | ADAMTSL3 | 0 | -2.351637 |  |
| 6814 | Analysis of substances | TRPC4    | 0 | -2.350511 |  |
| 6815 | Analysis of substances | EGFLAM   | 0 | -2.343421 |  |
| 6816 | Analysis of substances | ADAM23   | 0 | -2.327761 |  |
| 6817 | Analysis of substances | PLCL1    | 0 | -2.313588 |  |
| 6818 | Analysis of substances | F8       | 0 | -2.290006 |  |
| 6819 | Analysis of substances | DYX1C1   | 0 | -2.2856   |  |
| 6820 | Analysis of substances | KIAA0562 | 0 | -2.276218 |  |
| 6821 | Analysis of substances | CBLB     | 0 | -2.268181 |  |
| 6822 | Analysis of substances | WDR66    | 0 | -2.260226 |  |
| 6823 | Analysis of substances | ANXA10   | 0 | -2.250434 |  |
| 6824 | Analysis of substances | RIBC1    | 0 | -2.234544 |  |
| 6825 | Analysis of substances | SARS2    | 0 | -2.232155 |  |
| 6826 | Analysis of substances | BPMS2    | 0 | -2.220385 |  |
| 6827 | Analysis of substances | PCDH12   | 0 | -2.2155   |  |
| 6828 | Analysis of substances | ARHGAP28 | 0 | -2.212309 |  |
| 6829 | Analysis of substances | SHC4     | 0 | -2.211017 |  |
| 6830 | Analysis of substances | ANKRD26  | 0 | -2.202664 |  |
| 6831 | Analysis of substances | THAP2    | 0 | -2.19701  |  |
| 6832 | Analysis of substances | C6orf174 | 0 | -2.186645 |  |
| 6833 | Analysis of substances | PDZD2    | 0 | -2.171307 |  |
| 6834 | Analysis of substances | CTNNA2   | 0 | -2.161941 |  |
| 6835 | Analysis of substances | HPSE     | 0 | -2.138557 |  |
| 6836 | Analysis of substances | ICA1L    | 0 | -2.137896 |  |
| 6837 | Analysis of substances | ZNF23    | 0 | -2.137212 |  |
| 6838 | Analysis of substances | RELN     | 0 | -2.135254 |  |
| 6839 | Analysis of substances | MAGEA1   | 0 | -2.123421 |  |
| 6840 | Analysis of substances | HDX      | 0 | -2.113324 |  |
| 6841 | Analysis of substances | PDE6B    | 0 | -2.11024  |  |
| 6842 | Analysis of substances | ZNF711   | 0 | -2.105322 |  |
| 6843 | Analysis of substances | PLXDC1   | 0 | -2.079149 |  |
| 6844 | Analysis of substances | TIGD7    | 0 | -2.077586 |  |
| 6845 | Analysis of substances | NLRP11   | 0 | -2.046876 |  |
| 6846 | Analysis of substances | NAV3     | 0 | -2.040246 |  |
| 6847 | Analysis of substances | SLC26A4  | 0 | -2.027787 |  |
| 6848 | Analysis of substances | UCN3     | 0 | -2.023249 |  |

|      |                        |           |          |           |  |
|------|------------------------|-----------|----------|-----------|--|
| 6849 | Analysis of substances | RNF212    | 0        | -2.021613 |  |
| 6850 | Analysis of substances | KIAA1609  | 0        | -2.010578 |  |
| 6851 | Analysis of substances | CNPY4     | 0        | -2.010254 |  |
| 6852 | Aneuploidy             | SRSF6     | 0.000049 | -9.816535 |  |
| 6853 | Aneuploidy             | C1orf115  | 0.000005 | -9.309666 |  |
| 6854 | Aneuploidy             | PDGFRL    | 0.000022 | -9.227954 |  |
| 6855 | Aneuploidy             | LPAR1     | 0.000016 | -7.172098 |  |
| 6856 | Aneuploidy             | KLK7      | 0.000005 | -6.899787 |  |
| 6857 | Aneuploidy             | SRPX      | 0.000029 | -6.292872 |  |
| 6858 | Aneuploidy             | HBG1      | 0.000055 | -5.571564 |  |
| 6859 | Aneuploidy             | OSMR      | 0        | -5.5707   |  |
| 6860 | Aneuploidy             | PBX1      | 0.000039 | -5.1807   |  |
| 6861 | Aneuploidy             | FER       | 0.000047 | -5.166103 |  |
| 6862 | Aneuploidy             | ANKRD6    | 0.000002 | -4.762719 |  |
| 6863 | Aneuploidy             | PPP3CA    | 0        | -4.576634 |  |
| 6864 | Aneuploidy             | CUTC      | 0.000001 | -4.212615 |  |
| 6865 | Aneuploidy             | AKT3      | 0.000048 | -4.209524 |  |
| 6866 | Aneuploidy             | PTP4A1    | 0.000018 | -3.936562 |  |
| 6867 | Aneuploidy             | PKIA      | 0.000015 | -3.848526 |  |
| 6868 | Aneuploidy             | GRHL2     | 0.000046 | -3.758155 |  |
| 6869 | Aneuploidy             | NUTF2     | 0.000053 | -3.548485 |  |
| 6870 | Aneuploidy             | KCTD12    | 0.000019 | -3.407851 |  |
| 6871 | Aneuploidy             | SSR3      | 0.000048 | -3.337015 |  |
| 6872 | Aneuploidy             | DST       | 0.00003  | -3.323802 |  |
| 6873 | Aneuploidy             | BFSP1     | 0.00004  | -3.282172 |  |
| 6874 | Aneuploidy             | CPNE3     | 0.000005 | -3.030344 |  |
| 6875 | Aneuploidy             | LAPTM4B   | 0.000001 | -2.918159 |  |
| 6876 | Aneuploidy             | ZNF7      | 0.000022 | -2.894222 |  |
| 6877 | Aneuploidy             | EBAG9     | 0.000033 | -2.890125 |  |
| 6878 | Aneuploidy             | ESRP1     | 0.000009 | -2.720009 |  |
| 6879 | Aneuploidy             | FECH      | 0.000005 | -2.677403 |  |
| 6880 | Aneuploidy             | ETFDH     | 0.000039 | -2.655925 |  |
| 6881 | Aneuploidy             | UBE2W     | 0.000001 | -2.628488 |  |
| 6882 | Aneuploidy             | PQLC1     | 0.000033 | -2.596523 |  |
| 6883 | Aneuploidy             | LYN       | 0        | -2.5736   |  |
| 6884 | Aneuploidy             | RAD54B    | 0.000047 | -2.514686 |  |
| 6885 | Aneuploidy             | SNN       | 0.000055 | -2.417009 |  |
| 6886 | Aneuploidy             | AP3S1     | 0.000033 | -2.351749 |  |
| 6887 | Aneuploidy             | ARHGAP12  | 0.000017 | -2.34276  |  |
| 6888 | Aneuploidy             | CEP70     | 0.000031 | -2.31722  |  |
| 6889 | Aneuploidy             | AZIN1     | 0.000047 | -2.281083 |  |
| 6890 | Aneuploidy             | COX15     | 0.000005 | -2.277368 |  |
| 6891 | Aneuploidy             | CEPT1     | 0.000005 | -2.269288 |  |
| 6892 | Aneuploidy             | GPR125    | 0.000016 | -2.247221 |  |
| 6893 | Aneuploidy             | RAB11FIP2 | 0.000016 | -2.23979  |  |
| 6894 | Aneuploidy             | UBR5      | 0.00001  | -2.205252 |  |
| 6895 | Aneuploidy             | TSPAN14   | 0.000048 | -2.188828 |  |
| 6896 | Aneuploidy             | SMARCA5   | 0.000048 | -2.18391  |  |
| 6897 | Aneuploidy             | SEC23B    | 0.000039 | -2.131515 |  |
| 6898 | Aneuploidy             | SIM2      | 0.000032 | -2.104766 |  |

|      |            |           |          |           |  |
|------|------------|-----------|----------|-----------|--|
| 6899 | Aneuploidy | ABHD10    | 0.000013 | -2.075524 |  |
| 6900 | Aneuploidy | C10orf137 | 0.000039 | -2.042979 |  |
| 6901 | Aneuploidy | IQCK      | 0.000039 | -2.023703 |  |
| 6902 | Aneuploidy | NQO1      | 0.000005 | -2.001271 |  |
| 6903 | Aneuploidy | RPS6KA3   | 0.000032 | 2.009533  |  |
| 6904 | Aneuploidy | ATR       | 0.000029 | 2.0478    |  |
| 6905 | Aneuploidy | OSBPL2    | 0.00002  | 2.064886  |  |
| 6906 | Aneuploidy | MTMR1     | 0.000004 | 2.073537  |  |
| 6907 | Aneuploidy | HAUS7     | 0.000054 | 2.098542  |  |
| 6908 | Aneuploidy | NUP98     | 0.00003  | 2.141092  |  |
| 6909 | Aneuploidy | OSBPL10   | 0.000008 | 2.156816  |  |
| 6910 | Aneuploidy | KRT8      | 0.000041 | 2.184921  |  |
| 6911 | Aneuploidy | BLCAP     | 0.000016 | 2.187234  |  |
| 6912 | Aneuploidy | DDX27     | 0.000031 | 2.27204   |  |
| 6913 | Aneuploidy | MYST3     | 0.000054 | 2.310365  |  |
| 6914 | Aneuploidy | AHNAK     | 0.00004  | 2.34324   |  |
| 6915 | Aneuploidy | TUG1      | 0.000052 | 2.375275  |  |
| 6916 | Aneuploidy | CXorf40A  | 0.00004  | 2.387005  |  |
| 6917 | Aneuploidy | LMNA      | 0.000003 | 2.395559  |  |
| 6918 | Aneuploidy | RIT1      | 0.00003  | 2.417808  |  |
| 6919 | Aneuploidy | TCF7      | 0.000031 | 2.492176  |  |
| 6920 | Aneuploidy | KLHL7     | 0.000028 | 2.496174  |  |
| 6921 | Aneuploidy | OVOL2     | 0.000023 | 2.497405  |  |
| 6922 | Aneuploidy | UCHL3     | 0.000036 | 2.716893  |  |
| 6923 | Aneuploidy | TMEM111   | 0.000021 | 2.845     |  |
| 6924 | Aneuploidy | FAM179B   | 0.000052 | 3.069813  |  |
| 6925 | Aneuploidy | TXNDC9    | 0.00003  | 3.143618  |  |
| 6926 | Aneuploidy | MSH3      | 0.000023 | 3.212932  |  |
| 6927 | Aneuploidy | C7orf23   | 0.000001 | 3.31648   |  |
| 6928 | Aneuploidy | LTN1      | 0.000051 | 3.395212  |  |
| 6929 | Aneuploidy | DYNC1L12  | 0.000012 | 3.526746  |  |
| 6930 | Aneuploidy | FLNA      | 0.000032 | 3.527161  |  |
| 6931 | Aneuploidy | S100A10   | 0.000005 | 3.599249  |  |
| 6932 | Aneuploidy | PURA      | 0.000002 | 3.77063   |  |
| 6933 | Aneuploidy | PIP5K1B   | 0.000021 | 3.783596  |  |
| 6934 | Aneuploidy | TRAK1     | 0.000004 | 4.255449  |  |
| 6935 | Aneuploidy | MUC13     | 0.000022 | 4.460228  |  |
| 6936 | Aneuploidy | NET1      | 0.00002  | 4.535664  |  |
| 6937 | Aneuploidy | PRKCI     | 0.000004 | 4.556852  |  |
| 6938 | Aneuploidy | PCSK6     | 0.00001  | 4.589261  |  |
| 6939 | Aneuploidy | ZNF432    | 0.000039 | 4.663858  |  |
| 6940 | Aneuploidy | NCOR1     | 0        | 4.743417  |  |
| 6941 | Aneuploidy | PLTP      | 0.000049 | 4.971416  |  |
| 6942 | Aneuploidy | S100A11   | 0.000039 | 5.224193  |  |
| 6943 | Aneuploidy | TRIM44    | 0.000029 | 5.262296  |  |
| 6944 | Aneuploidy | AGRN      | 0.000039 | 5.378967  |  |
| 6945 | Aneuploidy | ITGA6     | 0.000058 | 5.49551   |  |
| 6946 | Aneuploidy | ME3       | 0.000041 | 6.606196  |  |
| 6947 | Aneuploidy | FAM3A     | 0.000015 | 6.724106  |  |
| 6948 | Aneuploidy | SMAP1     | 0.000028 | 6.901903  |  |

|      |                            |           |          |            |  |
|------|----------------------------|-----------|----------|------------|--|
| 6949 | Aneuploidy                 | CD302     | 0.000023 | 9.177254   |  |
| 6950 | Aneuploidy                 | FKBP11    | 0.000048 | 10.745881  |  |
| 6951 | Aneuploidy                 | CGREF1    | 0.000005 | 15.282677  |  |
| 6952 | Aneuploidy                 | NPL       | 0.000022 | 20.611888  |  |
| 6953 | Aneuploidy                 | GSTT1     | 0.000001 | 30.451178  |  |
| 6954 | Aneuploidy                 | NNT       | 0.00002  | 43.733952  |  |
| 6955 | Aneuploidy                 | PYCARD    | 0.000013 | 50.307447  |  |
| 6956 | Angina Pectoris            | TEF       | 0.02675  | 2.017657   |  |
| 6957 | Angina Pectoris            | GRAMD1C   | 0.00001  | 2.035444   |  |
| 6958 | Angina Pectoris            | LOC286272 | 0.007181 | 2.097509   |  |
| 6959 | Angina Pectoris            | BCR       | 0.007228 | 2.115363   |  |
| 6960 | Angina Pectoris            | CRISPLD2  | 0        | 2.115448   |  |
| 6961 | Angina Pectoris            | FLJ10404  | 0.019742 | 2.135739   |  |
| 6962 | Angina Pectoris            | PIK3R5    | 0        | 2.136157   |  |
| 6963 | Angina Pectoris            | WDR33     | 0.00082  | 2.155976   |  |
| 6964 | Angina Pectoris            | CCDC66    | 0.007251 | 2.215777   |  |
| 6965 | Bacterial Abscess          | UGT2A3    | 0.040416 | 1.545498   |  |
| 6966 | Breast cancer invasive NOS | ENOSF1    | 0.04975  | -2.163659  |  |
| 6967 | Breast cancer invasive NOS | LOC728448 | 0.004106 | 2.432727   |  |
| 6968 | Breast cancer invasive NOS | TCERG1    | 0.047633 | 2.472226   |  |
| 6969 | Breast Carcinoma           | ENOSF1    | 0.04975  | -2.163659  |  |
| 6970 | Breast Carcinoma           | LOC728448 | 0.004106 | 2.432727   |  |
| 6971 | Breast Carcinoma           | TCERG1    | 0.047633 | 2.472226   |  |
| 6972 | Bright red color           | KRT7      | 0.014466 | -3.354952  |  |
| 6973 | Bright red color           | TNNT1     | 0.015899 | -3.260496  |  |
| 6974 | Bright red color           | KLHL14    | 0.026774 | -2.208134  |  |
| 6975 | Bright red color           | TFAP2A    | 0.013004 | -2.126966  |  |
| 6976 | Bright red color           | PRAC      | 0.005446 | 2.523307   |  |
| 6977 | Calcium                    | DEFA6     | 0        | -1.514054  |  |
| 6978 | Calgranulin A              | TNNC2     | 0.009995 | -2.582217  |  |
| 6979 | Calgranulin A              | DDC       | 0.003443 | -2.572034  |  |
| 6980 | Calgranulin A              | MAPK13    | 0.000019 | -2.28648   |  |
| 6981 | Calgranulin A              | LYNX1     | 0.011944 | 2.022824   |  |
| 6982 | Calgranulin A              | FOS       | 0.000013 | 2.073813   |  |
| 6983 | Calgranulin A              | TEAD2     | 0.000157 | 2.084096   |  |
| 6984 | Calgranulin A              | HLA-DPB1  | 0.038891 | 2.311579   |  |
| 6985 | Calgranulin A              | LUM       | 0.004926 | 2.331764   |  |
| 6986 | Calgranulin A              | FOSB      | 0.000023 | 2.405711   |  |
| 6987 | Calgranulin A              | HLA-DRA   | 0.001366 | 2.558353   |  |
| 6988 | Calgranulin A              | ARGBP2    | 0.031991 | 2.744366   |  |
| 6989 | Calgranulin A              | CKIP-1    | 0.028965 | 2.807099   |  |
| 6990 | Calgranulin A              | C5orf4    | 0        | 3.160021   |  |
| 6991 | Calgranulin A              | RHOB      | 0.041968 | 3.179405   |  |
| 6992 | Calgranulin A              | IL2RB     | 0.04056  | 5.00008    |  |
| 6993 | Cancer of Rectum           | DLGAP4    | 0.009754 | 2.082438   |  |
| 6994 | Carcinoma                  | AFAP1-AS  | 0.000001 | -39.118393 |  |
| 6995 | Carcinoma                  | RGS12     | 0.000106 | -28.905205 |  |
| 6996 | Carcinoma                  | TNPO2     | 0.000055 | -25.002175 |  |
| 6997 | Carcinoma                  | MGC13053  | 0.000057 | -22.477033 |  |
| 6998 | Carcinoma                  | MGC10981  | 0.000001 | -21.885806 |  |

|      |           |           |          |            |  |
|------|-----------|-----------|----------|------------|--|
| 6999 | Carcinoma | CHERP     | 0.000111 | -21.388739 |  |
| 7000 | Carcinoma | SLC40A1   | 0.019761 | -18.769421 |  |
| 7001 | Carcinoma | KCNC1     | 0.000038 | -15.744929 |  |
| 7002 | Carcinoma | LOC120376 | 0.00199  | -14.159446 |  |
| 7003 | Carcinoma | AKR1C2    | 0        | -13.205982 |  |
| 7004 | Carcinoma | AUTS2     | 0.000907 | -11.509164 |  |
| 7005 | Carcinoma | C11orf93  | 0.003741 | -11.199361 |  |
| 7006 | Carcinoma | ZMYND8    | 0.000009 | -10.590426 |  |
| 7007 | Carcinoma | LILRB4    | 0.00013  | -10.501573 |  |
| 7008 | Carcinoma | PLAC8     | 0.017    | -10.303294 |  |
| 7009 | Carcinoma | TRPS1     | 0.002804 | -9.784698  |  |
| 7010 | Carcinoma | ADAM23    | 0.000027 | -9.674894  |  |
| 7011 | Carcinoma | ZNF776    | 0.010347 | -9.121891  |  |
| 7012 | Carcinoma | PCDH1     | 0.000089 | -8.652112  |  |
| 7013 | Carcinoma | TP53TG5   | 0.000045 | -8.044095  |  |
| 7014 | Carcinoma | SLC9A2    | 0.001748 | -8.042279  |  |
| 7015 | Carcinoma | TNFRSF13B | 0.000001 | -7.912258  |  |
| 7016 | Carcinoma | C1orf21   | 0.000634 | -7.66282   |  |
| 7017 | Carcinoma | SLC1A1    | 0.018372 | -7.648422  |  |
| 7018 | Carcinoma | NR0B1     | 0.000001 | -7.433996  |  |
| 7019 | Carcinoma | HIST1H3J  | 0.000022 | -7.061221  |  |
| 7020 | Carcinoma | FXYD2     | 0.000023 | -6.952451  |  |
| 7021 | Carcinoma | MYL10     | 0.000064 | -6.80726   |  |
| 7022 | Carcinoma | MEX3D     | 0.000012 | -6.751953  |  |
| 7023 | Carcinoma | MAGEA2    | 0.000022 | -6.692525  |  |
| 7024 | Carcinoma | RUNX1     | 0.000057 | -6.446082  |  |
| 7025 | Carcinoma | FER1L4    | 0.013956 | -6.206674  |  |
| 7026 | Carcinoma | CXorf21   | 0.00001  | -6.107469  |  |
| 7027 | Carcinoma | C4BPB     | 0.008991 | -6.069479  |  |
| 7028 | Carcinoma | GABRB2    | 0.00184  | -6.023043  |  |
| 7029 | Carcinoma | TMPRSS15  | 0        | -5.885783  |  |
| 7030 | Carcinoma | ALPPL2    | 0.000033 | -5.871586  |  |
| 7031 | Carcinoma | ATP6V1C2  | 0.01626  | -5.677063  |  |
| 7032 | Carcinoma | AQP3      | 0.001129 | -5.364991  |  |
| 7033 | Carcinoma | ZBTB7A    | 0.00012  | -5.346095  |  |
| 7034 | Carcinoma | FOXA2     | 0.000005 | -5.318482  |  |
| 7035 | Carcinoma | BMP2      | 0.019169 | -5.26016   |  |
| 7036 | Carcinoma | CDH19     | 0.000007 | -5.241121  |  |
| 7037 | Carcinoma | OSGIN1    | 0.000009 | -5.16969   |  |
| 7038 | Carcinoma | WHAMM     | 0.000064 | -5.165357  |  |
| 7039 | Carcinoma | STAP2     | 0.010853 | -5.162804  |  |
| 7040 | Carcinoma | SIDT1     | 0.010526 | -5.151468  |  |
| 7041 | Carcinoma | BLK       | 0.00009  | -5.091386  |  |
| 7042 | Carcinoma | COL16A1   | 0.000065 | -4.965684  |  |
| 7043 | Carcinoma | DGKE      | 0.001155 | -4.927506  |  |
| 7044 | Carcinoma | TGM4      | 0.000074 | -4.923004  |  |
| 7045 | Carcinoma | FRMD4B    | 0.00013  | -4.912172  |  |
| 7046 | Carcinoma | PROM2     | 0.018737 | -4.883214  |  |
| 7047 | Carcinoma | STXBP5L   | 0.00007  | -4.860969  |  |
| 7048 | Carcinoma | CSPG5     | 0.000021 | -4.835955  |  |



|      |           |          |          |           |  |
|------|-----------|----------|----------|-----------|--|
| 7049 | Carcinoma | SLC7A11  | 0.000076 | -4.824935 |  |
| 7050 | Carcinoma | RETNLB   | 0.004526 | -4.7277   |  |
| 7051 | Carcinoma | CAV2     | 0.000071 | -4.694315 |  |
| 7052 | Carcinoma | EHD1     | 0.000117 | -4.6369   |  |
| 7053 | Carcinoma | SP140L   | 0.007072 | -4.634434 |  |
| 7054 | Carcinoma | SLC12A3  | 0.000001 | -4.594117 |  |
| 7055 | Carcinoma | DTX4     | 0.011343 | -4.56354  |  |
| 7056 | Carcinoma | DNAJC24  | 0.000058 | -4.555036 |  |
| 7057 | Carcinoma | SIPA1L2  | 0.017535 | -4.538822 |  |
| 7058 | Carcinoma | ALDH3A1  | 0.00002  | -4.533677 |  |
| 7059 | Carcinoma | CAPN2    | 0.000135 | -4.52737  |  |
| 7060 | Carcinoma | NF1      | 0.021889 | -4.510667 |  |
| 7061 | Carcinoma | FAM84B   | 0.003637 | -4.477328 |  |
| 7062 | Carcinoma | PBX2     | 0.000057 | -4.417423 |  |
| 7063 | Carcinoma | DSC3     | 0.000065 | -4.416867 |  |
| 7064 | Carcinoma | ANKRD56  | 0.003557 | -4.409937 |  |
| 7065 | Carcinoma | AKR1B10  | 0.000008 | -4.399986 |  |
| 7066 | Carcinoma | POLQ     | 0.000003 | -4.393509 |  |
| 7067 | Carcinoma | ITPR3    | 0.00001  | -4.386942 |  |
| 7068 | Carcinoma | MAU2     | 0.000035 | -4.369071 |  |
| 7069 | Carcinoma | OR2H2    | 0.000076 | -4.363852 |  |
| 7070 | Carcinoma | ZNF433   | 0.006244 | -4.299435 |  |
| 7071 | Carcinoma | TTC39B   | 0.012589 | -4.259494 |  |
| 7072 | Carcinoma | RBBP6    | 0.000111 | -4.251571 |  |
| 7073 | Carcinoma | DLC1     | 0.019597 | -4.226791 |  |
| 7074 | Carcinoma | CRIM1    | 0.012668 | -4.211752 |  |
| 7075 | Carcinoma | MYBPC1   | 0.000026 | -4.207932 |  |
| 7076 | Carcinoma | TACSTD2  | 0.0105   | -4.206254 |  |
| 7077 | Carcinoma | LRTM1    | 0.000034 | -4.194771 |  |
| 7078 | Carcinoma | B4GALT2  | 0.000077 | -4.17918  |  |
| 7079 | Carcinoma | FHL1     | 0.000076 | -4.160872 |  |
| 7080 | Carcinoma | IGFBP5   | 0.000058 | -4.150725 |  |
| 7081 | Carcinoma | DEPDC6   | 0.002924 | -4.148052 |  |
| 7082 | Carcinoma | FAM107B  | 0.007931 | -4.135441 |  |
| 7083 | Carcinoma | AKR1C3   | 0.000049 | -4.104425 |  |
| 7084 | Carcinoma | LRCH4    | 0.000018 | -4.057453 |  |
| 7085 | Carcinoma | SF1      | 0.000019 | -4.036428 |  |
| 7086 | Carcinoma | GRHL2    | 0.000689 | -4.002688 |  |
| 7087 | Carcinoma | NRAP     | 0.000065 | -3.994532 |  |
| 7088 | Carcinoma | ARVCF    | 0.000047 | -3.994171 |  |
| 7089 | Carcinoma | KYNU     | 0.000064 | -3.985251 |  |
| 7090 | Carcinoma | GPATCH2  | 0.000057 | -3.964785 |  |
| 7091 | Carcinoma | DAG1     | 0.000008 | -3.961159 |  |
| 7092 | Carcinoma | SEC61B   | 0.013417 | -3.939735 |  |
| 7093 | Carcinoma | EFNA5    | 0.000027 | -3.918006 |  |
| 7094 | Carcinoma | ATP6V0A2 | 0.000092 | -3.904458 |  |
| 7095 | Carcinoma | NTSR1    | 0.000039 | -3.86174  |  |
| 7096 | Carcinoma | PCSK5    | 0.000065 | -3.823234 |  |
| 7097 | Carcinoma | TCF3     | 0.000023 | -3.804097 |  |
| 7098 | Carcinoma | A4GNT    | 0.000076 | -3.802451 |  |

|      |           |              |          |           |  |
|------|-----------|--------------|----------|-----------|--|
| 7099 | Carcinoma | DUSP8        | 0.000057 | -3.781893 |  |
| 7100 | Carcinoma | ARFRP1       | 0.000068 | -3.777238 |  |
| 7101 | Carcinoma | LHX3         | 0.000106 | -3.751055 |  |
| 7102 | Carcinoma | NFKBIZ       | 0.002582 | -3.749321 |  |
| 7103 | Carcinoma | TLE4         | 0.000023 | -3.727494 |  |
| 7104 | Carcinoma | SDPR         | 0.000127 | -3.715142 |  |
| 7105 | Carcinoma | SLC3A1       | 0.000083 | -3.699211 |  |
| 7106 | Carcinoma | CAV1         | 0.000089 | -3.674352 |  |
| 7107 | Carcinoma | NAALADL2     | 0.001281 | -3.642886 |  |
| 7108 | Carcinoma | ZNF35        | 0.000009 | -3.628832 |  |
| 7109 | Carcinoma | UNKL         | 0.00007  | -3.617383 |  |
| 7110 | Carcinoma | NTN4         | 0.01322  | -3.616901 |  |
| 7111 | Carcinoma | PTGES        | 0.000109 | -3.568756 |  |
| 7112 | Carcinoma | LY6G6D       | 0        | -3.55764  |  |
| 7113 | Carcinoma | C5orf4       | 0.000015 | -3.553788 |  |
| 7114 | Carcinoma | LOC100506653 | 0.000084 | -3.549835 |  |
| 7115 | Carcinoma | S100A11      | 0.028446 | -3.539459 |  |
| 7116 | Carcinoma | EGLN3        | 0.000057 | -3.524001 |  |
| 7117 | Carcinoma | LOC253012    | 0.00918  | -3.52357  |  |
| 7118 | Carcinoma | HNRNPD       | 0.000091 | -3.523349 |  |
| 7119 | Carcinoma | FKSG49       | 0.00004  | -3.492342 |  |
| 7120 | Carcinoma | C8orf60      | 0.000036 | -3.47396  |  |
| 7121 | Carcinoma | SEMA4A       | 0.002877 | -3.47258  |  |
| 7122 | Carcinoma | LOC100506076 | 0.001415 | -3.437059 |  |
| 7123 | Carcinoma | PTPRO        | 0.000127 | -3.436619 |  |
| 7124 | Carcinoma | C1orf66      | 0.000072 | -3.43163  |  |
| 7125 | Carcinoma | AIPL1        | 0.000122 | -3.419601 |  |
| 7126 | Carcinoma | ACSM3        | 0.020028 | -3.40773  |  |
| 7127 | Carcinoma | ETNK2        | 0.000077 | -3.39408  |  |
| 7128 | Carcinoma | IFNA4        | 0.00013  | -3.38553  |  |
| 7129 | Carcinoma | PIM1         | 0.000045 | -3.359225 |  |
| 7130 | Carcinoma | CD22         | 0.000068 | -3.347774 |  |
| 7131 | Carcinoma | IPO9         | 0.000027 | -3.334726 |  |
| 7132 | Carcinoma | PIGL         | 0.000051 | -3.309136 |  |
| 7133 | Carcinoma | PICK1        | 0.000035 | -3.292785 |  |
| 7134 | Carcinoma | IDH2         | 0.007791 | -3.287394 |  |
| 7135 | Carcinoma | ACSL1        | 0.003741 | -3.286705 |  |
| 7136 | Carcinoma | SULT2B1      | 0.000015 | -3.282291 |  |
| 7137 | Carcinoma | N4BP3        | 0.000034 | -3.277198 |  |
| 7138 | Carcinoma | TNFRSF25     | 0.000032 | -3.245756 |  |
| 7139 | Carcinoma | TJP2         | 0.027142 | -3.241607 |  |
| 7140 | Carcinoma | GJB3         | 0.020803 | -3.240817 |  |
| 7141 | Carcinoma | CCDC71       | 0.000036 | -3.239238 |  |
| 7142 | Carcinoma | SPRR1B       | 0.000029 | -3.234156 |  |
| 7143 | Carcinoma | NDE1         | 0.00006  | -3.218425 |  |
| 7144 | Carcinoma | GCLM         | 0.000043 | -3.217085 |  |
| 7145 | Carcinoma | LARP7        | 0.000036 | -3.209232 |  |
| 7146 | Carcinoma | EFNA1        | 0.000131 | -3.20448  |  |
| 7147 | Carcinoma | ATG10        | 0.00001  | -3.145049 |  |
| 7148 | Carcinoma | PRRG4        | 0.008991 | -3.144815 |  |

|      |           |              |          |           |  |
|------|-----------|--------------|----------|-----------|--|
| 7149 | Carcinoma | PROS1        | 0.008658 | -3.137914 |  |
| 7150 | Carcinoma | CLIC3        | 0.001264 | -3.134384 |  |
| 7151 | Carcinoma | SYTL5        | 0.013972 | -3.12653  |  |
| 7152 | Carcinoma | AKR1B1       | 0.000064 | -3.098509 |  |
| 7153 | Carcinoma | XKR9         | 0.00356  | -3.095881 |  |
| 7154 | Carcinoma | GPATCH4      | 0.000123 | -3.09419  |  |
| 7155 | Carcinoma | CELP         | 0.001409 | -3.093503 |  |
| 7156 | Carcinoma | CIDEC        | 0.000044 | -3.086425 |  |
| 7157 | Carcinoma | CEACAM5      | 0.000082 | -3.080702 |  |
| 7158 | Carcinoma | NOV          | 0.000079 | -3.067204 |  |
| 7159 | Carcinoma | ARL4D        | 0.000061 | -3.058711 |  |
| 7160 | Carcinoma | MLLT3        | 0.021883 | -3.051412 |  |
| 7161 | Carcinoma | ZNF814       | 0.005521 | -3.047155 |  |
| 7162 | Carcinoma | MTSS1        | 0.00199  | -3.036982 |  |
| 7163 | Carcinoma | MUC4         | 0.002306 | -3.020212 |  |
| 7164 | Carcinoma | DDB2         | 0.000135 | -3.019466 |  |
| 7165 | Carcinoma | PLEC         | 0.00004  | -3.016577 |  |
| 7166 | Carcinoma | MAFG         | 0.000056 | -3.016256 |  |
| 7167 | Carcinoma | LOC100509749 | 0.00011  | -3.00381  |  |
| 7168 | Carcinoma | GAD1         | 0.000098 | -2.996413 |  |
| 7169 | Carcinoma | LRRFIP1      | 0.000135 | -2.995153 |  |
| 7170 | Carcinoma | NDUFB8       | 0.00009  | -2.994833 |  |
| 7171 | Carcinoma | ITGB8        | 0.000414 | -2.981847 |  |
| 7172 | Carcinoma | SET          | 0.000135 | -2.975907 |  |
| 7173 | Carcinoma | SMARCA2      | 0.019039 | -2.975702 |  |
| 7174 | Carcinoma | RAB11FIP3    | 0.01942  | -2.96213  |  |
| 7175 | Carcinoma | SLC39A8      | 0.000023 | -2.95567  |  |
| 7176 | Carcinoma | ACSL6        | 0        | -2.953245 |  |
| 7177 | Carcinoma | MCTP2        | 0.000296 | -2.947277 |  |
| 7178 | Carcinoma | PCSK6        | 0.002966 | -2.944609 |  |
| 7179 | Carcinoma | HNF1B        | 0.006418 | -2.936906 |  |
| 7180 | Carcinoma | CEACAM6      | 0.000107 | -2.933895 |  |
| 7181 | Carcinoma | CPT1A        | 0.000098 | -2.928516 |  |
| 7182 | Carcinoma | LAMA2        | 0.00013  | -2.928162 |  |
| 7183 | Carcinoma | OSTF1        | 0.002982 | -2.928067 |  |
| 7184 | Carcinoma | CEACAM4      | 0.00013  | -2.922632 |  |
| 7185 | Carcinoma | CBLN1        | 0.000057 | -2.920639 |  |
| 7186 | Carcinoma | MTDH         | 0.000025 | -2.917288 |  |
| 7187 | Carcinoma | TGFBR3       | 0.001804 | -2.91611  |  |
| 7188 | Carcinoma | TMPRSS13     | 0.001981 | -2.913978 |  |
| 7189 | Carcinoma | PECAM1       | 0.000629 | -2.905212 |  |
| 7190 | Carcinoma | ST6GALNAC1   | 0.001264 | -2.902098 |  |
| 7191 | Carcinoma | TNNC2        | 0.013299 | -2.899656 |  |
| 7192 | Carcinoma | CLDN10       | 0.000042 | -2.876005 |  |
| 7193 | Carcinoma | NINJ2        | 0.000038 | -2.875023 |  |
| 7194 | Carcinoma | GLYATL1      | 0.005448 | -2.873433 |  |
| 7195 | Carcinoma | KPNA1        | 0.000106 | -2.865401 |  |
| 7196 | Carcinoma | DNAJB9       | 0.000077 | -2.85796  |  |
| 7197 | Carcinoma | USP19        | 0.000032 | -2.851396 |  |
| 7198 | Carcinoma | TPM1         | 0.017314 | -2.850394 |  |

|      |           |              |          |           |  |
|------|-----------|--------------|----------|-----------|--|
| 7199 | Carcinoma | SH2D3A       | 0.000038 | -2.8453   |  |
| 7200 | Carcinoma | STEAP1       | 0.000035 | -2.831924 |  |
| 7201 | Carcinoma | GPR143       | 0        | -2.826944 |  |
| 7202 | Carcinoma | FLI1         | 0.000033 | -2.8209   |  |
| 7203 | Carcinoma | PHF20L1      | 0.009641 | -2.820861 |  |
| 7204 | Carcinoma | MAPK8IP3     | 0.000026 | -2.820238 |  |
| 7205 | Carcinoma | NSUN5P1      | 0.000077 | -2.816299 |  |
| 7206 | Carcinoma | C11orf41     | 0.010566 | -2.801903 |  |
| 7207 | Carcinoma | FTH1         | 0.000068 | -2.789514 |  |
| 7208 | Carcinoma | LARP1        | 0.000035 | -2.783966 |  |
| 7209 | Carcinoma | TNFAIP8      | 0.003766 | -2.770951 |  |
| 7210 | Carcinoma | CA4          | 0.000031 | -2.754742 |  |
| 7211 | Carcinoma | GRM8         | 0        | -2.743257 |  |
| 7212 | Carcinoma | SOX15        | 0.000061 | -2.741587 |  |
| 7213 | Carcinoma | DLG3         | 0.012931 | -2.720056 |  |
| 7214 | Carcinoma | LOC100507619 | 0.00009  | -2.7176   |  |
| 7215 | Carcinoma | S100A10      | 0.011201 | -2.714502 |  |
| 7216 | Carcinoma | WLS          | 0.013364 | -2.712913 |  |
| 7217 | Carcinoma | PPFIA3       | 0.000042 | -2.697868 |  |
| 7218 | Carcinoma | ARAP2        | 0.000112 | -2.693515 |  |
| 7219 | Carcinoma | MAP2K3       | 0.000076 | -2.689806 |  |
| 7220 | Carcinoma | MORC4        | 0.003306 | -2.687133 |  |
| 7221 | Carcinoma | SLC6A13      | 0.000018 | -2.683649 |  |
| 7222 | Carcinoma | ZNF311       | 0.005635 | -2.676074 |  |
| 7223 | Carcinoma | TAOK3        | 0.000019 | -2.671247 |  |
| 7224 | Carcinoma | HLA-DMB      | 0.000008 | -2.666941 |  |
| 7225 | Carcinoma | RREB1        | 0.00013  | -2.654906 |  |
| 7226 | Carcinoma | FBR3         | 0.000074 | -2.647857 |  |
| 7227 | Carcinoma | DUSP13       | 0.000076 | -2.645843 |  |
| 7228 | Carcinoma | LIMS1        | 0.000018 | -2.635937 |  |
| 7229 | Carcinoma | SFSWAP       | 0.000046 | -2.635046 |  |
| 7230 | Carcinoma | CABLES1      | 0.004404 | -2.633219 |  |
| 7231 | Carcinoma | CARM1        | 0.000106 | -2.630905 |  |
| 7232 | Carcinoma | FNIP2        | 0.006509 | -2.623718 |  |
| 7233 | Carcinoma | ZNF248       | 0.007847 | -2.615369 |  |
| 7234 | Carcinoma | C2orf3       | 0.000116 | -2.598566 |  |
| 7235 | Carcinoma | C11orf20     | 0.027142 | -2.590815 |  |
| 7236 | Carcinoma | RB1          | 0.009877 | -2.585316 |  |
| 7237 | Carcinoma | NEDD4L       | 0.021441 | -2.568173 |  |
| 7238 | Carcinoma | C16orf75     | 0.007107 | -2.565298 |  |
| 7239 | Carcinoma | B3GNT3       | 0.020608 | -2.56527  |  |
| 7240 | Carcinoma | LOC283859    | 0.000008 | -2.563235 |  |
| 7241 | Carcinoma | SF3A2        | 0.00012  | -2.549798 |  |
| 7242 | Carcinoma | KHSRP        | 0.000012 | -2.547093 |  |
| 7243 | Carcinoma | TMEM65       | 0.003599 | -2.53359  |  |
| 7244 | Carcinoma | BPMS1        | 0.001179 | -2.532386 |  |
| 7245 | Carcinoma | CD53         | 0.000005 | -2.529536 |  |
| 7246 | Carcinoma | LOC202451    | 0.00726  | -2.527351 |  |
| 7247 | Carcinoma | IKBKG        | 0.000046 | -2.520416 |  |
| 7248 | Carcinoma | IL2RG        | 0.000027 | -2.51786  |  |

|      |           |          |          |           |  |
|------|-----------|----------|----------|-----------|--|
| 7249 | Carcinoma | RHOBTB3  | 0.00004  | -2.517528 |  |
| 7250 | Carcinoma | FOXP1    | 0.001437 | -2.501914 |  |
| 7251 | Carcinoma | THRA     | 0.000072 | -2.50089  |  |
| 7252 | Carcinoma | RGS3     | 0.000103 | -2.480314 |  |
| 7253 | Carcinoma | PRKD3    | 0.020608 | -2.463485 |  |
| 7254 | Carcinoma | ABCC6    | 0.002893 | -2.458853 |  |
| 7255 | Carcinoma | PIK3R2   | 0.00006  | -2.454348 |  |
| 7256 | Carcinoma | USP7     | 0.000103 | -2.446032 |  |
| 7257 | Carcinoma | CYP2C9   | 0.000064 | -2.443591 |  |
| 7258 | Carcinoma | FLJ45803 | 0.049225 | -2.438337 |  |
| 7259 | Carcinoma | OTUB1    | 0.000065 | -2.435734 |  |
| 7260 | Carcinoma | HDGF     | 0.000061 | -2.43274  |  |
| 7261 | Carcinoma | PDE10A   | 0.013599 | -2.432703 |  |
| 7262 | Carcinoma | PPP6R3   | 0.000072 | -2.430979 |  |
| 7263 | Carcinoma | PDIA6    | 0.011343 | -2.417617 |  |
| 7264 | Carcinoma | ABHD12   | 0.010834 | -2.414374 |  |
| 7265 | Carcinoma | CD99     | 0.000135 | -2.408596 |  |
| 7266 | Carcinoma | CPD      | 0.000059 | -2.40344  |  |
| 7267 | Carcinoma | TBX6     | 0.000027 | -2.401927 |  |
| 7268 | Carcinoma | ZNF321   | 0.000388 | -2.39441  |  |
| 7269 | Carcinoma | ASCL2    | 0.000021 | -2.389458 |  |
| 7270 | Carcinoma | ZNF543   | 0.016527 | -2.376952 |  |
| 7271 | Carcinoma | TFF3     | 0.000073 | -2.370632 |  |
| 7272 | Carcinoma | C20orf20 | 0.000111 | -2.360427 |  |
| 7273 | Carcinoma | DGAT2    | 0.001415 | -2.355231 |  |
| 7274 | Carcinoma | B3GNT6   | 0.001471 | -2.351516 |  |
| 7275 | Carcinoma | EML3     | 0.000077 | -2.342924 |  |
| 7276 | Carcinoma | PPP1R3B  | 0.012843 | -2.341575 |  |
| 7277 | Carcinoma | SDC4     | 0.005018 | -2.33946  |  |
| 7278 | Carcinoma | GFOD1    | 0.00012  | -2.339134 |  |
| 7279 | Carcinoma | GPX3     | 0.003811 | -2.337361 |  |
| 7280 | Carcinoma | BRF2     | 0.000106 | -2.336616 |  |
| 7281 | Carcinoma | C2orf68  | 0.012644 | -2.331396 |  |
| 7282 | Carcinoma | ARL13B   | 0.019408 | -2.33092  |  |
| 7283 | Carcinoma | RASA1    | 0.025446 | -2.328683 |  |
| 7284 | Carcinoma | PERLD1   | 0.003088 | -2.328353 |  |
| 7285 | Carcinoma | PTEN     | 0.000054 | -2.325082 |  |
| 7286 | Carcinoma | ANK3     | 0.017535 | -2.3094   |  |
| 7287 | Carcinoma | KRT18P28 | 0.020608 | -2.30616  |  |
| 7288 | Carcinoma | CSK      | 0.000082 | -2.30579  |  |
| 7289 | Carcinoma | XDH      | 0.006461 | -2.305729 |  |
| 7290 | Carcinoma | CPEB3    | 0.010839 | -2.297587 |  |
| 7291 | Carcinoma | GBP3     | 0.01964  | -2.292779 |  |
| 7292 | Carcinoma | ITPKB    | 0.014041 | -2.289924 |  |
| 7293 | Carcinoma | ZNF846   | 0.004833 | -2.285798 |  |
| 7294 | Carcinoma | GDE1     | 0.003952 | -2.285521 |  |
| 7295 | Carcinoma | PLA2G12B | 0        | -2.281188 |  |
| 7296 | Carcinoma | ZNF440   | 0.002132 | -2.280803 |  |
| 7297 | Carcinoma | ATP11B   | 0.015688 | -2.275942 |  |
| 7298 | Carcinoma | RNASEH2B | 0.000106 | -2.270795 |  |

|      |           |           |          |           |  |
|------|-----------|-----------|----------|-----------|--|
| 7299 | Carcinoma | MAP7D2    | 0.00008  | -2.270565 |  |
| 7300 | Carcinoma | GALNT12   | 0.003604 | -2.256357 |  |
| 7301 | Carcinoma | GPR172A   | 0.000105 | -2.253436 |  |
| 7302 | Carcinoma | RGNEF     | 0.002134 | -2.252946 |  |
| 7303 | Carcinoma | TTC23     | 0.000633 | -2.246011 |  |
| 7304 | Carcinoma | TLE1      | 0.014187 | -2.240267 |  |
| 7305 | Carcinoma | ZNF763    | 0.009078 | -2.239459 |  |
| 7306 | Carcinoma | SH3BP4    | 0.017548 | -2.238482 |  |
| 7307 | Carcinoma | PITX2     | 0.003088 | -2.238318 |  |
| 7308 | Carcinoma | GAB1      | 0.009535 | -2.235567 |  |
| 7309 | Carcinoma | ZNF606    | 0.000114 | -2.231185 |  |
| 7310 | Carcinoma | IFT57     | 0.000122 | -2.219589 |  |
| 7311 | Carcinoma | CHMP4B    | 0.026658 | -2.207659 |  |
| 7312 | Carcinoma | HSDL2     | 0.021362 | -2.199854 |  |
| 7313 | Carcinoma | PRELID2   | 0.012883 | -2.199767 |  |
| 7314 | Carcinoma | FAM3A     | 0.000907 | -2.189602 |  |
| 7315 | Carcinoma | ESYT2     | 0.047652 | -2.186254 |  |
| 7316 | Carcinoma | KIAA0564  | 0.019704 | -2.182719 |  |
| 7317 | Carcinoma | CAPN9     | 0.005284 | -2.180483 |  |
| 7318 | Carcinoma | PFKFB2    | 0.013461 | -2.180231 |  |
| 7319 | Carcinoma | CYP2B6    | 0.001339 | -2.179072 |  |
| 7320 | Carcinoma | RPRD1B    | 0.029311 | -2.177681 |  |
| 7321 | Carcinoma | CRAT      | 0.000336 | -2.175564 |  |
| 7322 | Carcinoma | TSHZ1     | 0.020543 | -2.167068 |  |
| 7323 | Carcinoma | UCA1      | 0.00003  | -2.163084 |  |
| 7324 | Carcinoma | FDFT1     | 0.003341 | -2.162342 |  |
| 7325 | Carcinoma | SPG11     | 0.001987 | -2.158412 |  |
| 7326 | Carcinoma | LOC158960 | 0.010615 | -2.158122 |  |
| 7327 | Carcinoma | SPTA1     | 0.003867 | -2.155778 |  |
| 7328 | Carcinoma | PABPN1    | 0.000111 | -2.154486 |  |
| 7329 | Carcinoma | KATNB1    | 0.00011  | -2.151478 |  |
| 7330 | Carcinoma | CCDC52    | 0.007328 | -2.134391 |  |
| 7331 | Carcinoma | SP8       | 0.003663 | -2.133573 |  |
| 7332 | Carcinoma | C6orf105  | 0.013019 | -2.126648 |  |
| 7333 | Carcinoma | CYP4F3    | 0.000143 | -2.124238 |  |
| 7334 | Carcinoma | SENP6     | 0.000121 | -2.120086 |  |
| 7335 | Carcinoma | ACE2      | 0.00002  | -2.115815 |  |
| 7336 | Carcinoma | SPTBN1    | 0.006153 | -2.114518 |  |
| 7337 | Carcinoma | PLEKHF2   | 0.008057 | -2.111063 |  |
| 7338 | Carcinoma | FLJ32063  | 0.000026 | -2.110672 |  |
| 7339 | Carcinoma | KRT18P40  | 0.026329 | -2.109748 |  |
| 7340 | Carcinoma | DEDD2     | 0.012192 | -2.10962  |  |
| 7341 | Carcinoma | PHTF1     | 0.000076 | -2.104901 |  |
| 7342 | Carcinoma | LITAF     | 0.016345 | -2.100854 |  |
| 7343 | Carcinoma | MMAB      | 0.006901 | -2.100348 |  |
| 7344 | Carcinoma | B4GALT1   | 0.026518 | -2.094797 |  |
| 7345 | Carcinoma | PNCK      | 0.010007 | -2.09411  |  |
| 7346 | Carcinoma | DHRS11    | 0.01925  | -2.090078 |  |
| 7347 | Carcinoma | ZNF468    | 0.004192 | -2.088397 |  |
| 7348 | Carcinoma | ITPKC     | 0.000072 | -2.087498 |  |

|      |           |              |          |           |  |
|------|-----------|--------------|----------|-----------|--|
| 7349 | Carcinoma | BCAP31       | 0.029102 | -2.085391 |  |
| 7350 | Carcinoma | LOC100130097 | 0.004961 | -2.082549 |  |
| 7351 | Carcinoma | CDKL5        | 0.000542 | -2.081966 |  |
| 7352 | Carcinoma | FLJ21511     | 0.012163 | -2.080542 |  |
| 7353 | Carcinoma | FAM189A2     | 0.000084 | -2.073444 |  |
| 7354 | Carcinoma | SCAPER       | 0.000231 | -2.070198 |  |
| 7355 | Carcinoma | SPINT1       | 0.001129 | -2.067415 |  |
| 7356 | Carcinoma | C13orf18     | 0        | -2.063961 |  |
| 7357 | Carcinoma | RNF180       | 0.017077 | -2.063449 |  |
| 7358 | Carcinoma | ZNF217       | 0.005104 | -2.063444 |  |
| 7359 | Carcinoma | LOC100131656 | 0.015819 | -2.058042 |  |
| 7360 | Carcinoma | G6PD         | 0.000125 | -2.057143 |  |
| 7361 | Carcinoma | FGGY         | 0.000003 | -2.05571  |  |
| 7362 | Carcinoma | HSD11B2      | 0.025277 | -2.055615 |  |
| 7363 | Carcinoma | PIK3C2B      | 0.017314 | -2.05405  |  |
| 7364 | Carcinoma | DCPS         | 0.009252 | -2.052663 |  |
| 7365 | Carcinoma | SEMA4D       | 0.004604 | -2.049904 |  |
| 7366 | Carcinoma | COL17A1      | 0.007833 | -2.046672 |  |
| 7367 | Carcinoma | FGFR4        | 0.001061 | -2.045508 |  |
| 7368 | Carcinoma | ITGA2        | 0.016406 | -2.042484 |  |
| 7369 | Carcinoma | EXPH5        | 0.002828 | -2.040899 |  |
| 7370 | Carcinoma | C1orf57      | 0.013028 | -2.035422 |  |
| 7371 | Carcinoma | XKRX         | 0.012647 | -2.033572 |  |
| 7372 | Carcinoma | LOC647954    | 0.012644 | -2.032923 |  |
| 7373 | Carcinoma | AP2B1        | 0.006656 | -2.029773 |  |
| 7374 | Carcinoma | WDR52        | 0.004621 | -2.027418 |  |
| 7375 | Carcinoma | MAP2K1       | 0.00009  | -2.026253 |  |
| 7376 | Carcinoma | KRT8P15      | 0.011623 | -2.01938  |  |
| 7377 | Carcinoma | USP53        | 0.018686 | -2.012765 |  |
| 7378 | Carcinoma | C15orf58     | 0.020557 | -2.011262 |  |
| 7379 | Carcinoma | PDIA3        | 0.0074   | -2.010856 |  |
| 7380 | Carcinoma | MAP3K1       | 0.01661  | -2.008542 |  |
| 7381 | Carcinoma | BMP4         | 0.003044 | -2.00842  |  |
| 7382 | Carcinoma | DENND1B      | 0.006742 | -2.008021 |  |
| 7383 | Carcinoma | IFFO2        | 0.01325  | -2.007613 |  |
| 7384 | Carcinoma | DZIP3        | 0.012271 | 2.000518  |  |
| 7385 | Carcinoma | TSGA14       | 0.003612 | 2.001251  |  |
| 7386 | Carcinoma | ARHGAP22     | 0.020434 | 2.00748   |  |
| 7387 | Carcinoma | WDR4         | 0.005951 | 2.011851  |  |
| 7388 | Carcinoma | ALDH1A2      | 0.005643 | 2.015339  |  |
| 7389 | Carcinoma | RSPH3        | 0.006247 | 2.021823  |  |
| 7390 | Carcinoma | CLTA         | 0.005428 | 2.021952  |  |
| 7391 | Carcinoma | STRADB       | 0.012465 | 2.031674  |  |
| 7392 | Carcinoma | RHOB         | 0.013164 | 2.036848  |  |
| 7393 | Carcinoma | GPHA2        | 0.025676 | 2.037398  |  |
| 7394 | Carcinoma | SULT1A4      | 0.048053 | 2.043884  |  |
| 7395 | Carcinoma | C10orf11     | 0.014983 | 2.044568  |  |
| 7396 | Carcinoma | SF3B1        | 0.001362 | 2.046207  |  |
| 7397 | Carcinoma | CES3         | 0.013431 | 2.049517  |  |
| 7398 | Carcinoma | SPACA1       | 0.0005   | 2.051074  |  |

|      |           |              |          |          |  |
|------|-----------|--------------|----------|----------|--|
| 7399 | Carcinoma | RP4-691N24.1 | 0.002206 | 2.058134 |  |
| 7400 | Carcinoma | OSBPL3       | 0.011867 | 2.060366 |  |
| 7401 | Carcinoma | C14orf149    | 0.001989 | 2.060639 |  |
| 7402 | Carcinoma | PLXND1       | 0.004196 | 2.061164 |  |
| 7403 | Carcinoma | SYCE1L       | 0.008967 | 2.064878 |  |
| 7404 | Carcinoma | PLEKHG5      | 0.018026 | 2.065478 |  |
| 7405 | Carcinoma | CHST7        | 0.002742 | 2.069626 |  |
| 7406 | Carcinoma | TMCO7        | 0.019128 | 2.078171 |  |
| 7407 | Carcinoma | AGK          | 0.021273 | 2.090902 |  |
| 7408 | Carcinoma | SMN1         | 0.004016 | 2.093915 |  |
| 7409 | Carcinoma | ZDHC14       | 0.010779 | 2.093977 |  |
| 7410 | Carcinoma | BRSK2        | 0.009768 | 2.10978  |  |
| 7411 | Carcinoma | MPP6         | 0.012893 | 2.112255 |  |
| 7412 | Carcinoma | GPR135       | 0.004404 | 2.116307 |  |
| 7413 | Carcinoma | NQO2         | 0.045141 | 2.11926  |  |
| 7414 | Carcinoma | ZP3          | 0.04518  | 2.121726 |  |
| 7415 | Carcinoma | RPAIN        | 0.008464 | 2.123614 |  |
| 7416 | Carcinoma | EIF4A1       | 0.019891 | 2.125377 |  |
| 7417 | Carcinoma | PMS2CL       | 0.014843 | 2.137439 |  |
| 7418 | Carcinoma | LOC728264    | 0.045305 | 2.137676 |  |
| 7419 | Carcinoma | MED12L       | 0.019408 | 2.159997 |  |
| 7420 | Carcinoma | ARL4A        | 0.013857 | 2.163612 |  |
| 7421 | Carcinoma | HMGA1        | 0.007385 | 2.165079 |  |
| 7422 | Carcinoma | KIAA1826     | 0.005547 | 2.176751 |  |
| 7423 | Carcinoma | EGFL7        | 0.008716 | 2.181817 |  |
| 7424 | Carcinoma | ANKRD10      | 0.004034 | 2.183903 |  |
| 7425 | Carcinoma | PM20D2       | 0.015341 | 2.186986 |  |
| 7426 | Carcinoma | VGF          | 0.009595 | 2.187983 |  |
| 7427 | Carcinoma | RASA4        | 0.002876 | 2.204158 |  |
| 7428 | Carcinoma | CYB5R4       | 0.013965 | 2.206459 |  |
| 7429 | Carcinoma | ASF1A        | 0.000454 | 2.209496 |  |
| 7430 | Carcinoma | ANTXR1       | 0.005943 | 2.210334 |  |
| 7431 | Carcinoma | SAT1         | 0.017781 | 2.21315  |  |
| 7432 | Carcinoma | GSR          | 0.047652 | 2.223884 |  |
| 7433 | Carcinoma | PDPR         | 0.00954  | 2.22585  |  |
| 7434 | Carcinoma | RP9P         | 0.006461 | 2.23255  |  |
| 7435 | Carcinoma | MIRHG1       | 0.016461 | 2.247712 |  |
| 7436 | Carcinoma | ENO3         | 0.003437 | 2.252535 |  |
| 7437 | Carcinoma | SNTB2        | 0.003741 | 2.254721 |  |
| 7438 | Carcinoma | BBS10        | 0.018909 | 2.261239 |  |
| 7439 | Carcinoma | PREX1        | 0.018223 | 2.266672 |  |
| 7440 | Carcinoma | KIAA0232     | 0.018762 | 2.272248 |  |
| 7441 | Carcinoma | LOC647500    | 0.015184 | 2.281428 |  |
| 7442 | Carcinoma | CPNE7        | 0.008849 | 2.291022 |  |
| 7443 | Carcinoma | LTBP4        | 0.011681 | 2.291729 |  |
| 7444 | Carcinoma | DYNC1LI1     | 0.008863 | 2.304749 |  |
| 7445 | Carcinoma | ZNF385A      | 0.008706 | 2.321134 |  |
| 7446 | Carcinoma | ITGA7        | 0.002233 | 2.331223 |  |
| 7447 | Carcinoma | MMP17        | 0.001663 | 2.338375 |  |
| 7448 | Carcinoma | ASPN         | 0.044548 | 2.341592 |  |



|      |           |           |          |          |  |
|------|-----------|-----------|----------|----------|--|
| 7449 | Carcinoma | RAB3IL1   | 0.019379 | 2.349284 |  |
| 7450 | Carcinoma | LEPREL1   | 0.02253  | 2.360884 |  |
| 7451 | Carcinoma | PIP5K1C   | 0.01578  | 2.365342 |  |
| 7452 | Carcinoma | PCSK1N    | 0.027142 | 2.377122 |  |
| 7453 | Carcinoma | TRIM9     | 0.020712 | 2.379126 |  |
| 7454 | Carcinoma | MAP1A     | 0.019503 | 2.382149 |  |
| 7455 | Carcinoma | ERICH1    | 0.017968 | 2.389311 |  |
| 7456 | Carcinoma | SEPN1     | 0.020423 | 2.391331 |  |
| 7457 | Carcinoma | HN1       | 0.004632 | 2.418086 |  |
| 7458 | Carcinoma | RBMS1     | 0.019433 | 2.430764 |  |
| 7459 | Carcinoma | LGALSL    | 0.029316 | 2.432193 |  |
| 7460 | Carcinoma | BLOC1S2   | 0.003456 | 2.447418 |  |
| 7461 | Carcinoma | FKBP1A    | 0.000076 | 2.45199  |  |
| 7462 | Carcinoma | ZCCHC4    | 0.018582 | 2.454218 |  |
| 7463 | Carcinoma | CUTC      | 0.012466 | 2.468057 |  |
| 7464 | Carcinoma | ZEB1      | 0.009143 | 2.526585 |  |
| 7465 | Carcinoma | ZBTB40    | 0.014354 | 2.54084  |  |
| 7466 | Carcinoma | ATMIN     | 0.025676 | 2.544496 |  |
| 7467 | Carcinoma | ZBTB1     | 0.021035 | 2.547114 |  |
| 7468 | Carcinoma | SLC30A3   | 0.020557 | 2.548024 |  |
| 7469 | Carcinoma | LOC646652 | 0.011458 | 2.550961 |  |
| 7470 | Carcinoma | COMMD1    | 0.028719 | 2.552143 |  |
| 7471 | Carcinoma | NQO1      | 0.047652 | 2.558355 |  |
| 7472 | Carcinoma | AP3B2     | 0.018762 | 2.560671 |  |
| 7473 | Carcinoma | HNRNPH2   | 0.000135 | 2.561835 |  |
| 7474 | Carcinoma | FBXL2     | 0.00872  | 2.562055 |  |
| 7475 | Carcinoma | POPDC3    | 0.014155 | 2.564107 |  |
| 7476 | Carcinoma | SEC31A    | 0.000607 | 2.569136 |  |
| 7477 | Carcinoma | DDN       | 0.004634 | 2.571268 |  |
| 7478 | Carcinoma | ADAMTSL5  | 0.026518 | 2.572127 |  |
| 7479 | Carcinoma | SIX1      | 0.001158 | 2.576043 |  |
| 7480 | Carcinoma | CHPF      | 0.010208 | 2.58291  |  |
| 7481 | Carcinoma | ZNF302    | 0.027281 | 2.604239 |  |
| 7482 | Carcinoma | SFRS2B    | 0.016461 | 2.61632  |  |
| 7483 | Carcinoma | CRTAP     | 0.012843 | 2.643348 |  |
| 7484 | Carcinoma | RTDR1     | 0.010584 | 2.649156 |  |
| 7485 | Carcinoma | PALM      | 0.016478 | 2.656587 |  |
| 7486 | Carcinoma | TNNT1     | 0.014912 | 2.669609 |  |
| 7487 | Carcinoma | ASMTL     | 0.00947  | 2.67043  |  |
| 7488 | Carcinoma | PAM       | 0.016492 | 2.671382 |  |
| 7489 | Carcinoma | CLGN      | 0.020764 | 2.686142 |  |
| 7490 | Carcinoma | GOLGA6    | 0.018173 | 2.68629  |  |
| 7491 | Carcinoma | PLXNB1    | 0.001182 | 2.694092 |  |
| 7492 | Carcinoma | FLJ32679  | 0.017874 | 2.701101 |  |
| 7493 | Carcinoma | NELL2     | 0.010266 | 2.717178 |  |
| 7494 | Carcinoma | ADRA2C    | 0.01626  | 2.728654 |  |
| 7495 | Carcinoma | ZFP41     | 0.027142 | 2.75588  |  |
| 7496 | Carcinoma | NELF      | 0.014908 | 2.774092 |  |
| 7497 | Carcinoma | GART      | 0.000003 | 2.782632 |  |
| 7498 | Carcinoma | PGM5P2    | 0.01626  | 2.824512 |  |

|      |           |              |          |          |  |
|------|-----------|--------------|----------|----------|--|
| 7499 | Carcinoma | DUSP9        | 0.006294 | 2.869153 |  |
| 7500 | Carcinoma | NACAD        | 0.020608 | 2.882066 |  |
| 7501 | Carcinoma | ABCC5        | 0.007342 | 2.882723 |  |
| 7502 | Carcinoma | GREM1        | 0.016862 | 2.896806 |  |
| 7503 | Carcinoma | NFATC1       | 0.021083 | 2.915825 |  |
| 7504 | Carcinoma | GALNAC4S-6S  | 0.012981 | 2.922235 |  |
| 7505 | Carcinoma | LRP3         | 0.01558  | 2.923191 |  |
| 7506 | Carcinoma | NME4         | 0.020338 | 2.93605  |  |
| 7507 | Carcinoma | GEFT         | 0.006398 | 2.939987 |  |
| 7508 | Carcinoma | COMP         | 0.029502 | 2.972799 |  |
| 7509 | Carcinoma | PTMS         | 0.001307 | 2.976809 |  |
| 7510 | Carcinoma | GDAP1        | 0.012813 | 2.990239 |  |
| 7511 | Carcinoma | PDE4A        | 0.011824 | 2.9928   |  |
| 7512 | Carcinoma | NDRG4        | 0.004771 | 3.020168 |  |
| 7513 | Carcinoma | UAP1L1       | 0.006871 | 3.024504 |  |
| 7514 | Carcinoma | IGFBP6       | 0.019008 | 3.032017 |  |
| 7515 | Carcinoma | LIMD2        | 0.025676 | 3.10859  |  |
| 7516 | Carcinoma | LOC441426    | 0.000088 | 3.110782 |  |
| 7517 | Carcinoma | PDZD7        | 0.016037 | 3.124893 |  |
| 7518 | Carcinoma | NEFH         | 0.025676 | 3.133159 |  |
| 7519 | Carcinoma | C21orf66     | 0.018737 | 3.197915 |  |
| 7520 | Carcinoma | LOC441644    | 0.008169 | 3.201406 |  |
| 7521 | Carcinoma | TIMP3        | 0.021111 | 3.211283 |  |
| 7522 | Carcinoma | LOC100132288 | 0.025676 | 3.212723 |  |
| 7523 | Carcinoma | LOC283701    | 0.004163 | 3.214429 |  |
| 7524 | Carcinoma | GYLTL1B      | 0.010325 | 3.226717 |  |
| 7525 | Carcinoma | EFHA2        | 0.014967 | 3.230156 |  |
| 7526 | Carcinoma | FLJ35776     | 0.012002 | 3.250152 |  |
| 7527 | Carcinoma | B4GALNT1     | 0.006499 | 3.267059 |  |
| 7528 | Carcinoma | DPF1         | 0.027057 | 3.288169 |  |
| 7529 | Carcinoma | SMO          | 0.00053  | 3.291159 |  |
| 7530 | Carcinoma | TEKT4        | 0.025676 | 3.35916  |  |
| 7531 | Carcinoma | CACNA1H      | 0.000771 | 3.401727 |  |
| 7532 | Carcinoma | DPYSL4       | 0.001602 | 3.401975 |  |
| 7533 | Carcinoma | MAN1A1       | 0.010712 | 3.408983 |  |
| 7534 | Carcinoma | ARSG         | 0.00797  | 3.447322 |  |
| 7535 | Carcinoma | TSPAN33      | 0.00681  | 3.449669 |  |
| 7536 | Carcinoma | CYB5B        | 0.003809 | 3.454204 |  |
| 7537 | Carcinoma | SYDE1        | 0.000414 | 3.541521 |  |
| 7538 | Carcinoma | LOC645195    | 0.012012 | 3.547287 |  |
| 7539 | Carcinoma | LOC389834    | 0.002    | 3.584732 |  |
| 7540 | Carcinoma | IFRD1        | 0.005119 | 3.616756 |  |
| 7541 | Carcinoma | SLC6A8       | 0.010493 | 3.629509 |  |
| 7542 | Carcinoma | ANGPT2       | 0.008951 | 3.632042 |  |
| 7543 | Carcinoma | PAOX         | 0.021273 | 3.639009 |  |
| 7544 | Carcinoma | NINL         | 0.000217 | 3.642402 |  |
| 7545 | Carcinoma | LASS4        | 0.004814 | 3.649492 |  |
| 7546 | Carcinoma | PCBP3        | 0.009055 | 3.652086 |  |
| 7547 | Carcinoma | PET112L      | 0.000084 | 3.703134 |  |
| 7548 | Carcinoma | ZNF502       | 0.020608 | 3.730266 |  |

|      |           |              |          |          |  |
|------|-----------|--------------|----------|----------|--|
| 7549 | Carcinoma | AHNAK2       | 0.013741 | 3.760479 |  |
| 7550 | Carcinoma | NAV1         | 0.025228 | 3.786932 |  |
| 7551 | Carcinoma | OIT3         | 0.000239 | 3.814152 |  |
| 7552 | Carcinoma | LMF1         | 0.002134 | 3.82222  |  |
| 7553 | Carcinoma | LOC286467    | 0.000182 | 3.857226 |  |
| 7554 | Carcinoma | CALD1        | 0.019039 | 3.876866 |  |
| 7555 | Carcinoma | ADORA2A      | 0.019117 | 3.956696 |  |
| 7556 | Carcinoma | MAPK11       | 0.00413  | 3.97709  |  |
| 7557 | Carcinoma | MN1          | 0.010693 | 4.00112  |  |
| 7558 | Carcinoma | VAMP1        | 0.025647 | 4.05013  |  |
| 7559 | Carcinoma | TMEM63C      | 0.018308 | 4.069646 |  |
| 7560 | Carcinoma | NOTUM        | 0.018442 | 4.079847 |  |
| 7561 | Carcinoma | LOC643837    | 0.012843 | 4.100147 |  |
| 7562 | Carcinoma | GPSM1        | 0.000834 | 4.116343 |  |
| 7563 | Carcinoma | TRMT12       | 0.007172 | 4.133027 |  |
| 7564 | Carcinoma | LEMD1        | 0.016029 | 4.145322 |  |
| 7565 | Carcinoma | ZDHHC22      | 0.02253  | 4.160992 |  |
| 7566 | Carcinoma | SMYD5        | 0.000078 | 4.21254  |  |
| 7567 | Carcinoma | DLG4         | 0.000012 | 4.232465 |  |
| 7568 | Carcinoma | EMP1         | 0.010214 | 4.32057  |  |
| 7569 | Carcinoma | TMEM45A      | 0.002825 | 4.344767 |  |
| 7570 | Carcinoma | TNNI3        | 0.020023 | 4.417284 |  |
| 7571 | Carcinoma | HES6         | 0.013728 | 4.449856 |  |
| 7572 | Carcinoma | EMP3         | 0.00921  | 4.641864 |  |
| 7573 | Carcinoma | DEF6         | 0.027142 | 4.670714 |  |
| 7574 | Carcinoma | TTYH2        | 0.011594 | 4.672787 |  |
| 7575 | Carcinoma | MAPK8IP1     | 0.000188 | 4.78588  |  |
| 7576 | Carcinoma | BCL8         | 0.003038 | 4.8871   |  |
| 7577 | Carcinoma | FTCD         | 0.008226 | 4.892626 |  |
| 7578 | Carcinoma | GOLGA8E      | 0.019223 | 4.907303 |  |
| 7579 | Carcinoma | DKK3         | 0.027281 | 4.920574 |  |
| 7580 | Carcinoma | SIRPA        | 0.017968 | 4.936256 |  |
| 7581 | Carcinoma | DMKN         | 0.006213 | 4.960156 |  |
| 7582 | Carcinoma | NPM2         | 0.005643 | 5.015901 |  |
| 7583 | Carcinoma | SLC22A15     | 0.010403 | 5.27288  |  |
| 7584 | Carcinoma | COL6A2       | 0.017968 | 5.316226 |  |
| 7585 | Carcinoma | AHRR         | 0.021847 | 5.341179 |  |
| 7586 | Carcinoma | FNBP1        | 0.010856 | 5.377556 |  |
| 7587 | Carcinoma | CD40         | 0.017968 | 5.44852  |  |
| 7588 | Carcinoma | C1orf67      | 0.017168 | 5.505956 |  |
| 7589 | Carcinoma | CLIP4        | 0.008863 | 5.511869 |  |
| 7590 | Carcinoma | LOC100128328 | 0.008706 | 5.518642 |  |
| 7591 | Carcinoma | ZNF114       | 0.007566 | 5.529534 |  |
| 7592 | Carcinoma | MRGPRF       | 0.015184 | 5.602956 |  |
| 7593 | Carcinoma | MSRB3        | 0.018037 | 5.614288 |  |
| 7594 | Carcinoma | DNAH14       | 0.007847 | 5.94509  |  |
| 7595 | Carcinoma | AGAP11       | 0.000223 | 5.970225 |  |
| 7596 | Carcinoma | VWDE         | 0.013538 | 6.020041 |  |
| 7597 | Carcinoma | AKR1CL2      | 0.000595 | 6.170824 |  |
| 7598 | Carcinoma | TSNAXIP1     | 0.000648 | 6.21202  |  |

|      |                                  |              |          |            |  |
|------|----------------------------------|--------------|----------|------------|--|
| 7599 | Carcinoma                        | C20orf194    | 0.010102 | 6.301346   |  |
| 7600 | Carcinoma                        | DOC2BL       | 0.014088 | 6.582898   |  |
| 7601 | Carcinoma                        | DFNA5        | 0.002582 | 6.744855   |  |
| 7602 | Carcinoma                        | SERPINE2     | 0.006501 | 6.769717   |  |
| 7603 | Carcinoma                        | PRDM16       | 0.005406 | 6.800626   |  |
| 7604 | Carcinoma                        | LOC253264    | 0.027281 | 6.926622   |  |
| 7605 | Carcinoma                        | FBXO27       | 0.002336 | 7.163194   |  |
| 7606 | Carcinoma                        | ZDBF2        | 0.004311 | 7.852688   |  |
| 7607 | Carcinoma                        | LOC440459    | 0.002816 | 8.066444   |  |
| 7608 | Carcinoma                        | DNM3         | 0.000001 | 8.136646   |  |
| 7609 | Carcinoma                        | MFAP2        | 0.006418 | 8.223447   |  |
| 7610 | Carcinoma                        | SOX8         | 0.004544 | 8.312914   |  |
| 7611 | Carcinoma                        | LOC149351    | 0.000174 | 8.619757   |  |
| 7612 | Carcinoma                        | SESN3        | 0.001534 | 9.090617   |  |
| 7613 | Carcinoma                        | SERPINI1     | 0.000008 | 9.45675    |  |
| 7614 | Carcinoma                        | C10orf116    | 0.017419 | 9.864284   |  |
| 7615 | Carcinoma                        | HLTF         | 0.017132 | 10.799318  |  |
| 7616 | Carcinoma                        | WASF3        | 0.000232 | 11.667004  |  |
| 7617 | Carcinoma                        | EMR2         | 0.000149 | 11.752461  |  |
| 7618 | Carcinoma                        | LOC100288413 | 0        | 12.241052  |  |
| 7619 | Carcinoma                        | NES          | 0.000577 | 12.481898  |  |
| 7620 | Carcinoma                        | CKB          | 0.001631 | 13.080778  |  |
| 7621 | Carcinoma                        | SLC16A6      | 0.000593 | 13.471531  |  |
| 7622 | Carcinoma                        | KRT23        | 0.011023 | 13.780799  |  |
| 7623 | Carcinoma                        | B4GALNT4     | 0.000008 | 14.138318  |  |
| 7624 | Carcinoma                        | FCF1         | 0.000076 | 15.378772  |  |
| 7625 | Carcinoma                        | PRKACB       | 0.01626  | 16.234631  |  |
| 7626 | Carcinoma                        | PTPRS        | 0.000282 | 18.370832  |  |
| 7627 | Carcinoma                        | FERMT2       | 0.002326 | 24.879964  |  |
| 7628 | Carcinoma                        | BEX2         | 0.003088 | 33.278956  |  |
| 7629 | Carcinoma                        | ID2B         | 0.000027 | 38.430629  |  |
| 7630 | Carcinoma                        | STAT5A       | 0.000106 | 51.764099  |  |
| 7631 | Carcinoma of the Large Intestine | MUC4         | 0.001993 | -60.311531 |  |
| 7632 | Carcinoma of the Large Intestine | MUC2         | 0.001405 | -60.058351 |  |
| 7633 | Carcinoma of the Large Intestine | FOXP2        | 0.002498 | -27.659136 |  |
| 7634 | Carcinoma of the Large Intestine | B3GNT6       | 0.000062 | -27.448227 |  |
| 7635 | Carcinoma of the Large Intestine | SCGB2A1      | 0.00296  | -25.494518 |  |
| 7636 | Carcinoma of the Large Intestine | MMP28        | 0.00029  | -24.383882 |  |
| 7637 | Carcinoma of the Large Intestine | KCNMA1       | 0.000529 | -21.649194 |  |
| 7638 | Carcinoma of the Large Intestine | LRMP         | 0.0036   | -20.996778 |  |
| 7639 | Carcinoma of the Large Intestine | CWH43        | 0.00122  | -20.467763 |  |
| 7640 | Carcinoma of the Large Intestine | SERTAD4      | 0.000207 | -20.029386 |  |
| 7641 | Carcinoma of the Large Intestine | SPDEF        | 0.003466 | -18.98549  |  |
| 7642 | Carcinoma of the Large Intestine | LOC100509635 | 0.000651 | -16.450784 |  |
| 7643 | Carcinoma of the Large Intestine | CHST5        | 0.003988 | -16.204897 |  |
| 7644 | Carcinoma of the Large Intestine | ANO5         | 0.000982 | -15.875208 |  |
| 7645 | Carcinoma of the Large Intestine | AKAP5        | 0.000488 | -13.182194 |  |
| 7646 | Carcinoma of the Large Intestine | PTGDR        | 0.001995 | -11.897712 |  |
| 7647 | Carcinoma of the Large Intestine | CD1D         | 0.000358 | -11.888861 |  |
| 7648 | Carcinoma of the Large Intestine | KLF9         | 0.003783 | -11.537512 |  |

|      |                                  |              |          |            |  |
|------|----------------------------------|--------------|----------|------------|--|
| 7649 | Carcinoma of the Large Intestine | SPINK4       | 0        | -10.604966 |  |
| 7650 | Carcinoma of the Large Intestine | SCIN         | 0.000675 | -10.535578 |  |
| 7651 | Carcinoma of the Large Intestine | ZG16         | 0.000001 | -10.523496 |  |
| 7652 | Carcinoma of the Large Intestine | ACOT11       | 0.004247 | -10.396793 |  |
| 7653 | Carcinoma of the Large Intestine | METTL7A      | 0.000403 | -10.26555  |  |
| 7654 | Carcinoma of the Large Intestine | PPP1R9A      | 0.000004 | -10.144455 |  |
| 7655 | Carcinoma of the Large Intestine | CA4          | 0.000001 | -10.09118  |  |
| 7656 | Carcinoma of the Large Intestine | DQX1         | 0.004044 | -10.025782 |  |
| 7657 | Carcinoma of the Large Intestine | CREB3L1      | 0.003101 | -9.594399  |  |
| 7658 | Carcinoma of the Large Intestine | RAB27B       | 0.000026 | -9.499798  |  |
| 7659 | Carcinoma of the Large Intestine | CACNB2       | 0.000114 | -9.483538  |  |
| 7660 | Carcinoma of the Large Intestine | ASAP3        | 0.002559 | -9.13715   |  |
| 7661 | Carcinoma of the Large Intestine | ZBTB7C       | 0.00056  | -9.045275  |  |
| 7662 | Carcinoma of the Large Intestine | FOXA1        | 0.003339 | -8.939768  |  |
| 7663 | Carcinoma of the Large Intestine | ALDH1A1      | 0.003273 | -8.905504  |  |
| 7664 | Carcinoma of the Large Intestine | PADI2        | 0.00277  | -8.762223  |  |
| 7665 | Carcinoma of the Large Intestine | FABP1        | 0        | -8.719388  |  |
| 7666 | Carcinoma of the Large Intestine | SYT17        | 0.000365 | -8.713691  |  |
| 7667 | Carcinoma of the Large Intestine | KCNK10       | 0.000558 | -8.692129  |  |
| 7668 | Carcinoma of the Large Intestine | LOC100129069 | 0.001754 | -8.641304  |  |
| 7669 | Carcinoma of the Large Intestine | HMGCS2       | 0.000405 | -8.54771   |  |
| 7670 | Carcinoma of the Large Intestine | HGD          | 0.001124 | -8.34414   |  |
| 7671 | Carcinoma of the Large Intestine | FLJ32063     | 0.00281  | -8.296896  |  |
| 7672 | Carcinoma of the Large Intestine | CLCA4        | 0.000002 | -8.038073  |  |
| 7673 | Carcinoma of the Large Intestine | CEACAM7      | 0.000001 | -7.835955  |  |
| 7674 | Carcinoma of the Large Intestine | NR3C2        | 0.000114 | -7.832787  |  |
| 7675 | Carcinoma of the Large Intestine | ITM2A        | 0.004857 | -7.7829    |  |
| 7676 | Carcinoma of the Large Intestine | TPBG         | 0.005167 | -7.771458  |  |
| 7677 | Carcinoma of the Large Intestine | KLF4         | 0.003466 | -7.611532  |  |
| 7678 | Carcinoma of the Large Intestine | GLIS3        | 0.000782 | -7.497044  |  |
| 7679 | Carcinoma of the Large Intestine | ERN2         | 0.000972 | -7.486607  |  |
| 7680 | Carcinoma of the Large Intestine | MOGAT2       | 0.000358 | -7.460037  |  |
| 7681 | Carcinoma of the Large Intestine | B3GALT5      | 0.000358 | -7.341713  |  |
| 7682 | Carcinoma of the Large Intestine | OR51I1       | 0.004706 | -7.291565  |  |
| 7683 | Carcinoma of the Large Intestine | EFNA5        | 0.000405 | -7.221174  |  |
| 7684 | Carcinoma of the Large Intestine | DOCK8        | 0.004993 | -7.212796  |  |
| 7685 | Carcinoma of the Large Intestine | LAMA1        | 0.002619 | -7.153433  |  |
| 7686 | Carcinoma of the Large Intestine | C14orf50     | 0.000358 | -7.032244  |  |
| 7687 | Carcinoma of the Large Intestine | GRAMD3       | 0.000488 | -6.964465  |  |
| 7688 | Carcinoma of the Large Intestine | CCNJL        | 0.000163 | -6.772087  |  |
| 7689 | Carcinoma of the Large Intestine | C11orf93     | 0.001565 | -6.711384  |  |
| 7690 | Carcinoma of the Large Intestine | SPATA18      | 0.003433 | -6.664482  |  |
| 7691 | Carcinoma of the Large Intestine | FARSB        | 0.00277  | -6.56314   |  |
| 7692 | Carcinoma of the Large Intestine | DPF3         | 0.000202 | -6.507991  |  |
| 7693 | Carcinoma of the Large Intestine | PLCE1        | 0.00071  | -6.424479  |  |
| 7694 | Carcinoma of the Large Intestine | MDFIC        | 0.000923 | -6.391231  |  |
| 7695 | Carcinoma of the Large Intestine | PLCL2        | 0.003101 | -6.299826  |  |
| 7696 | Carcinoma of the Large Intestine | CHGA         | 0.000004 | -6.084005  |  |
| 7697 | Carcinoma of the Large Intestine | CBFA2T3      | 0.000405 | -6.06337   |  |
| 7698 | Carcinoma of the Large Intestine | HPGDS        | 0.00138  | -5.994216  |  |

|      |                                  |              |          |           |  |
|------|----------------------------------|--------------|----------|-----------|--|
| 7699 | Carcinoma of the Large Intestine | PSMG4        | 0.00332  | -5.931413 |  |
| 7700 | Carcinoma of the Large Intestine | EDIL3        | 0.001296 | -5.905179 |  |
| 7701 | Carcinoma of the Large Intestine | SLC9A2       | 0.004579 | -5.796233 |  |
| 7702 | Carcinoma of the Large Intestine | FRMD3        | 0.004638 | -5.691552 |  |
| 7703 | Carcinoma of the Large Intestine | SLC16A7      | 0.003386 | -5.613971 |  |
| 7704 | Carcinoma of the Large Intestine | ACTG2        | 0        | -5.576115 |  |
| 7705 | Carcinoma of the Large Intestine | AQP8         | 0.000157 | -5.570023 |  |
| 7706 | Carcinoma of the Large Intestine | CHP2         | 0.004857 | -5.506835 |  |
| 7707 | Carcinoma of the Large Intestine | MS4A12       | 0.000032 | -5.360331 |  |
| 7708 | Carcinoma of the Large Intestine | PDE4D        | 0.000331 | -5.300381 |  |
| 7709 | Carcinoma of the Large Intestine | LOC643072    | 0.003988 | -5.284507 |  |
| 7710 | Carcinoma of the Large Intestine | PRKACB       | 0.000052 | -5.284016 |  |
| 7711 | Carcinoma of the Large Intestine | RNF125       | 0.003737 | -5.236229 |  |
| 7712 | Carcinoma of the Large Intestine | SIDT1        | 0.000358 | -5.216442 |  |
| 7713 | Carcinoma of the Large Intestine | MATN2        | 0.000471 | -5.191578 |  |
| 7714 | Carcinoma of the Large Intestine | MCTP2        | 0.000114 | -5.145834 |  |
| 7715 | Carcinoma of the Large Intestine | VSTM2A       | 0.002883 | -5.04434  |  |
| 7716 | Carcinoma of the Large Intestine | NR5A2        | 0.00211  | -5.041885 |  |
| 7717 | Carcinoma of the Large Intestine | TNFRSF11A    | 0.000529 | -4.980546 |  |
| 7718 | Carcinoma of the Large Intestine | EFHC2        | 0.000215 | -4.968653 |  |
| 7719 | Carcinoma of the Large Intestine | VILL         | 0.000651 | -4.956432 |  |
| 7720 | Carcinoma of the Large Intestine | GOLM1        | 0.000215 | -4.926988 |  |
| 7721 | Carcinoma of the Large Intestine | DENND1B      | 0.002619 | -4.908923 |  |
| 7722 | Carcinoma of the Large Intestine | C2orf88      | 0.001516 | -4.861751 |  |
| 7723 | Carcinoma of the Large Intestine | KIAA1731     | 0.004141 | -4.835946 |  |
| 7724 | Carcinoma of the Large Intestine | DEGS2        | 0.004217 | -4.794887 |  |
| 7725 | Carcinoma of the Large Intestine | KSR2         | 0.004857 | -4.793552 |  |
| 7726 | Carcinoma of the Large Intestine | TRPM6        | 0.000711 | -4.765605 |  |
| 7727 | Carcinoma of the Large Intestine | TEX9         | 0.003737 | -4.753316 |  |
| 7728 | Carcinoma of the Large Intestine | TEP1         | 0.00237  | -4.711473 |  |
| 7729 | Carcinoma of the Large Intestine | KLK1         | 0.00332  | -4.696096 |  |
| 7730 | Carcinoma of the Large Intestine | LOC100506589 | 0.001854 | -4.673174 |  |
| 7731 | Carcinoma of the Large Intestine | CCL28        | 0.000605 | -4.654903 |  |
| 7732 | Carcinoma of the Large Intestine | C16orf53     | 0.003149 | -4.649649 |  |
| 7733 | Carcinoma of the Large Intestine | BMP2         | 0.004341 | -4.567065 |  |
| 7734 | Carcinoma of the Large Intestine | GNE          | 0.004141 | -4.563829 |  |
| 7735 | Carcinoma of the Large Intestine | TOX          | 0.001493 | -4.475666 |  |
| 7736 | Carcinoma of the Large Intestine | PARVA        | 0.002922 | -4.438447 |  |
| 7737 | Carcinoma of the Large Intestine | SSTR1        | 0.003988 | -4.42735  |  |
| 7738 | Carcinoma of the Large Intestine | SIAE         | 0.001854 | -4.411799 |  |
| 7739 | Carcinoma of the Large Intestine | RAB27A       | 0.00002  | -4.39503  |  |
| 7740 | Carcinoma of the Large Intestine | ARMCX4       | 0.003737 | -4.391212 |  |
| 7741 | Carcinoma of the Large Intestine | LOC727916    | 0.005164 | -4.380807 |  |
| 7742 | Carcinoma of the Large Intestine | FAS          | 0.002883 | -4.344731 |  |
| 7743 | Carcinoma of the Large Intestine | LXN          | 0.001245 | -4.295182 |  |
| 7744 | Carcinoma of the Large Intestine | LOC100128288 | 0.004857 | -4.240265 |  |
| 7745 | Carcinoma of the Large Intestine | FYB          | 0.003433 | -4.225236 |  |
| 7746 | Carcinoma of the Large Intestine | DDX26B       | 0.004644 | -4.223636 |  |
| 7747 | Carcinoma of the Large Intestine | ANG          | 0.000488 | -4.192727 |  |
| 7748 | Carcinoma of the Large Intestine | LOC100216546 | 0.000776 | -4.176673 |  |

|      |                                  |            |          |           |  |
|------|----------------------------------|------------|----------|-----------|--|
| 7749 | Carcinoma of the Large Intestine | EBF1       | 0.004544 | -4.164009 |  |
| 7750 | Carcinoma of the Large Intestine | TEX11      | 0.001604 | -4.140414 |  |
| 7751 | Carcinoma of the Large Intestine | PLAC8      | 0.000009 | -4.134202 |  |
| 7752 | Carcinoma of the Large Intestine | STYK1      | 0.000446 | -4.069078 |  |
| 7753 | Carcinoma of the Large Intestine | TCEA3      | 0.003014 | -4.058089 |  |
| 7754 | Carcinoma of the Large Intestine | CXCL14     | 0.000133 | -4.05581  |  |
| 7755 | Carcinoma of the Large Intestine | LOC728903  | 0.001325 | -4.04142  |  |
| 7756 | Carcinoma of the Large Intestine | PAFAH2     | 0.001196 | -4.022292 |  |
| 7757 | Carcinoma of the Large Intestine | KCTD1      | 0.00296  | -4.01414  |  |
| 7758 | Carcinoma of the Large Intestine | GPR27      | 0.004668 | -4.013727 |  |
| 7759 | Carcinoma of the Large Intestine | QSOX1      | 0.003047 | -3.986606 |  |
| 7760 | Carcinoma of the Large Intestine | UBQLN4     | 0.004931 | -3.93261  |  |
| 7761 | Carcinoma of the Large Intestine | EHF        | 0.001404 | -3.901229 |  |
| 7762 | Carcinoma of the Large Intestine | CARD16     | 0.003031 | -3.878799 |  |
| 7763 | Carcinoma of the Large Intestine | CAPN13     | 0.002883 | -3.8648   |  |
| 7764 | Carcinoma of the Large Intestine | TTLL5      | 0.004629 | -3.848962 |  |
| 7765 | Carcinoma of the Large Intestine | DST        | 0        | -3.84509  |  |
| 7766 | Carcinoma of the Large Intestine | C4orf34    | 0.000493 | -3.841658 |  |
| 7767 | Carcinoma of the Large Intestine | BCAR3      | 0.001754 | -3.82109  |  |
| 7768 | Carcinoma of the Large Intestine | C1orf21    | 0.000694 | -3.812153 |  |
| 7769 | Carcinoma of the Large Intestine | SYTL2      | 0.001871 | -3.807608 |  |
| 7770 | Carcinoma of the Large Intestine | ITLN1      | 0        | -3.790869 |  |
| 7771 | Carcinoma of the Large Intestine | ACVRL1     | 0.002015 | -3.786947 |  |
| 7772 | Carcinoma of the Large Intestine | PHF7       | 0.004347 | -3.782336 |  |
| 7773 | Carcinoma of the Large Intestine | CCDC68     | 0.002058 | -3.775933 |  |
| 7774 | Carcinoma of the Large Intestine | ADH6       | 0.002922 | -3.740311 |  |
| 7775 | Carcinoma of the Large Intestine | HNRNPD     | 0.004611 | -3.731405 |  |
| 7776 | Carcinoma of the Large Intestine | RAB26      | 0.00113  | -3.719949 |  |
| 7777 | Carcinoma of the Large Intestine | SPECC1     | 0.004848 | -3.698745 |  |
| 7778 | Carcinoma of the Large Intestine | SFRS18     | 0.001805 | -3.6981   |  |
| 7779 | Carcinoma of the Large Intestine | ABCA5      | 0.004638 | -3.659734 |  |
| 7780 | Carcinoma of the Large Intestine | CLMN       | 0.000358 | -3.643807 |  |
| 7781 | Carcinoma of the Large Intestine | FAM149A    | 0.004517 | -3.641557 |  |
| 7782 | Carcinoma of the Large Intestine | MAOA       | 0.00219  | -3.624132 |  |
| 7783 | Carcinoma of the Large Intestine | C14orf106  | 0.004644 | -3.614466 |  |
| 7784 | Carcinoma of the Large Intestine | FBLN1      | 0.000002 | -3.606652 |  |
| 7785 | Carcinoma of the Large Intestine | VPS26A     | 0.002559 | -3.599722 |  |
| 7786 | Carcinoma of the Large Intestine | TRAPPC10   | 0.00293  | -3.583657 |  |
| 7787 | Carcinoma of the Large Intestine | TPSG1      | 0        | -3.549494 |  |
| 7788 | Carcinoma of the Large Intestine | DMXL2      | 0.002619 | -3.539085 |  |
| 7789 | Carcinoma of the Large Intestine | ARMC8      | 0.00345  | -3.52509  |  |
| 7790 | Carcinoma of the Large Intestine | ADAMDEC1   | 0.000004 | -3.51873  |  |
| 7791 | Carcinoma of the Large Intestine | FLJ27352   | 0.001463 | -3.511211 |  |
| 7792 | Carcinoma of the Large Intestine | REG4       | 0.000059 | -3.503367 |  |
| 7793 | Carcinoma of the Large Intestine | PTPN21     | 0.001057 | -3.479038 |  |
| 7794 | Carcinoma of the Large Intestine | SAMD13     | 0.000333 | -3.468445 |  |
| 7795 | Carcinoma of the Large Intestine | FRMD4B     | 0.0037   | -3.467352 |  |
| 7796 | Carcinoma of the Large Intestine | NCRNA00081 | 0.000927 | -3.424376 |  |
| 7797 | Carcinoma of the Large Intestine | PYY        | 0.000183 | -3.420898 |  |
| 7798 | Carcinoma of the Large Intestine | AKAP10     | 0.003047 | -3.41148  |  |

|      |                                  |              |          |           |  |
|------|----------------------------------|--------------|----------|-----------|--|
| 7799 | Carcinoma of the Large Intestine | LIMA1        | 0.003047 | -3.393403 |  |
| 7800 | Carcinoma of the Large Intestine | EHHADH       | 0.004243 | -3.390529 |  |
| 7801 | Carcinoma of the Large Intestine | ENTPD5       | 0.004217 | -3.376918 |  |
| 7802 | Carcinoma of the Large Intestine | FLJ23867     | 0.000215 | -3.375153 |  |
| 7803 | Carcinoma of the Large Intestine | PGAP1        | 0.001395 | -3.368329 |  |
| 7804 | Carcinoma of the Large Intestine | RAP1GAP      | 0.004544 | -3.366309 |  |
| 7805 | Carcinoma of the Large Intestine | SEMA6A       | 0.003988 | -3.359076 |  |
| 7806 | Carcinoma of the Large Intestine | KIAA1324     | 0.00219  | -3.346923 |  |
| 7807 | Carcinoma of the Large Intestine | MGC21881     | 0.004483 | -3.345753 |  |
| 7808 | Carcinoma of the Large Intestine | MMP3         | 0.000106 | -3.344679 |  |
| 7809 | Carcinoma of the Large Intestine | MGLL         | 0        | -3.330854 |  |
| 7810 | Carcinoma of the Large Intestine | SBF2         | 0.000987 | -3.325026 |  |
| 7811 | Carcinoma of the Large Intestine | ENOSF1       | 0.000324 | -3.307115 |  |
| 7812 | Carcinoma of the Large Intestine | ATP8B1       | 0.001005 | -3.299743 |  |
| 7813 | Carcinoma of the Large Intestine | NAB1         | 0.001404 | -3.298022 |  |
| 7814 | Carcinoma of the Large Intestine | CAPN5        | 0.00049  | -3.289094 |  |
| 7815 | Carcinoma of the Large Intestine | SLC44A1      | 0.000488 | -3.283266 |  |
| 7816 | Carcinoma of the Large Intestine | PRORS1P      | 0.000953 | -3.274898 |  |
| 7817 | Carcinoma of the Large Intestine | SLC22A23     | 0.000488 | -3.272734 |  |
| 7818 | Carcinoma of the Large Intestine | LOC100289632 | 0.002906 | -3.25408  |  |
| 7819 | Carcinoma of the Large Intestine | CHD9         | 0.000795 | -3.253819 |  |
| 7820 | Carcinoma of the Large Intestine | DAPP1        | 0.004176 | -3.24881  |  |
| 7821 | Carcinoma of the Large Intestine | SLC35A1      | 0.000136 | -3.233704 |  |
| 7822 | Carcinoma of the Large Intestine | SIPA1L2      | 0.004857 | -3.210274 |  |
| 7823 | Carcinoma of the Large Intestine | KIAA1370     | 0.002922 | -3.207262 |  |
| 7824 | Carcinoma of the Large Intestine | GNAQ         | 0.001906 | -3.202496 |  |
| 7825 | Carcinoma of the Large Intestine | PTPRH        | 0.004811 | -3.182022 |  |
| 7826 | Carcinoma of the Large Intestine | PLEKHH1      | 0.001405 | -3.180597 |  |
| 7827 | Carcinoma of the Large Intestine | KIF13A       | 0.000802 | -3.177314 |  |
| 7828 | Carcinoma of the Large Intestine | ALDH6A1      | 0.002957 | -3.169574 |  |
| 7829 | Carcinoma of the Large Intestine | PPP1R12B     | 0.003424 | -3.145353 |  |
| 7830 | Carcinoma of the Large Intestine | LEAP2        | 0.000488 | -3.125762 |  |
| 7831 | Carcinoma of the Large Intestine | AHNAK        | 0.002883 | -3.114242 |  |
| 7832 | Carcinoma of the Large Intestine | MEIS3P1      | 0.002861 | -3.102961 |  |
| 7833 | Carcinoma of the Large Intestine | TET2         | 0.00293  | -3.096987 |  |
| 7834 | Carcinoma of the Large Intestine | SPARCL1      | 0.000004 | -3.096174 |  |
| 7835 | Carcinoma of the Large Intestine | CMAS         | 0.000711 | -3.085735 |  |
| 7836 | Carcinoma of the Large Intestine | TFF3         | 0.004638 | -3.069182 |  |
| 7837 | Carcinoma of the Large Intestine | SELENBP1     | 0.000071 | -3.066158 |  |
| 7838 | Carcinoma of the Large Intestine | C2orf72      | 0.002451 | -3.066078 |  |
| 7839 | Carcinoma of the Large Intestine | C4orf19      | 0.001296 | -3.063415 |  |
| 7840 | Carcinoma of the Large Intestine | DARC         | 0.000001 | -3.028116 |  |
| 7841 | Carcinoma of the Large Intestine | VIP          | 0.000001 | -3.019982 |  |
| 7842 | Carcinoma of the Large Intestine | SR140        | 0.003805 | -3.019369 |  |
| 7843 | Carcinoma of the Large Intestine | SCAPER       | 0.004247 | -3.017734 |  |
| 7844 | Carcinoma of the Large Intestine | AKR1B10      | 0.000698 | -3.002267 |  |
| 7845 | Carcinoma of the Large Intestine | LOC400573    | 0.001278 | -2.984874 |  |
| 7846 | Carcinoma of the Large Intestine | ACACB        | 0.004517 | -2.983934 |  |
| 7847 | Carcinoma of the Large Intestine | KIAA1468     | 0.000776 | -2.972723 |  |
| 7848 | Carcinoma of the Large Intestine | DTWD1        | 0.004638 | -2.969544 |  |



|      |                                  |              |          |           |  |
|------|----------------------------------|--------------|----------|-----------|--|
| 7849 | Carcinoma of the Large Intestine | FOXP1        | 0.000365 | -2.942729 |  |
| 7850 | Carcinoma of the Large Intestine | MON2         | 0.000711 | -2.938999 |  |
| 7851 | Carcinoma of the Large Intestine | FAM48A       | 0.002854 | -2.936586 |  |
| 7852 | Carcinoma of the Large Intestine | VMD2L1       | 0.000134 | -2.885943 |  |
| 7853 | Carcinoma of the Large Intestine | CEP70        | 0.001068 | -2.88124  |  |
| 7854 | Carcinoma of the Large Intestine | CWF19L2      | 0.003589 | -2.85482  |  |
| 7855 | Carcinoma of the Large Intestine | FGD4         | 0.000358 | -2.846781 |  |
| 7856 | Carcinoma of the Large Intestine | C9orf125     | 0.000623 | -2.833038 |  |
| 7857 | Carcinoma of the Large Intestine | RBM25        | 0.000802 | -2.822374 |  |
| 7858 | Carcinoma of the Large Intestine | HSBP1L1      | 0.000488 | -2.82191  |  |
| 7859 | Carcinoma of the Large Intestine | ABCC3        | 0.002833 | -2.821428 |  |
| 7860 | Carcinoma of the Large Intestine | PPP2R3A      | 0.003288 | -2.821136 |  |
| 7861 | Carcinoma of the Large Intestine | GPA33        | 0.000665 | -2.816748 |  |
| 7862 | Carcinoma of the Large Intestine | RNASE4       | 0.000488 | -2.815054 |  |
| 7863 | Carcinoma of the Large Intestine | PLCD1        | 0.004517 | -2.809502 |  |
| 7864 | Carcinoma of the Large Intestine | SULT1A3      | 0.003634 | -2.807614 |  |
| 7865 | Carcinoma of the Large Intestine | VWF          | 0.000708 | -2.797215 |  |
| 7866 | Carcinoma of the Large Intestine | SAHH3        | 0.000006 | -2.796622 |  |
| 7867 | Carcinoma of the Large Intestine | LYST         | 0.000207 | -2.788893 |  |
| 7868 | Carcinoma of the Large Intestine | LOC100128893 | 0.004141 | -2.787412 |  |
| 7869 | Carcinoma of the Large Intestine | TLE1         | 0.004773 | -2.779947 |  |
| 7870 | Carcinoma of the Large Intestine | CPEB3        | 0.005131 | -2.761783 |  |
| 7871 | Carcinoma of the Large Intestine | EXPH5        | 0.000446 | -2.756191 |  |
| 7872 | Carcinoma of the Large Intestine | LOC100506168 | 0.003101 | -2.737855 |  |
| 7873 | Carcinoma of the Large Intestine | TNFRSF10D    | 0.00281  | -2.734711 |  |
| 7874 | Carcinoma of the Large Intestine | HSD11B2      | 0.000411 | -2.707869 |  |
| 7875 | Carcinoma of the Large Intestine | SGSM3        | 0.002619 | -2.702811 |  |
| 7876 | Carcinoma of the Large Intestine | LOC100506493 | 0.005131 | -2.692526 |  |
| 7877 | Carcinoma of the Large Intestine | NHSL1        | 0.002223 | -2.69232  |  |
| 7878 | Carcinoma of the Large Intestine | PCLO         | 0.003424 | -2.682969 |  |
| 7879 | Carcinoma of the Large Intestine | LOC342918    | 0.031445 | -2.676083 |  |
| 7880 | Carcinoma of the Large Intestine | NEDD4L       | 0.00332  | -2.675522 |  |
| 7881 | Carcinoma of the Large Intestine | TRUB1        | 0.016286 | -2.67491  |  |
| 7882 | Carcinoma of the Large Intestine | TPT1         | 0.004857 | -2.663384 |  |
| 7883 | Carcinoma of the Large Intestine | GPATCH2      | 0.003649 | -2.652061 |  |
| 7884 | Carcinoma of the Large Intestine | SPON1        | 0.000432 | -2.646048 |  |
| 7885 | Carcinoma of the Large Intestine | CCL13        | 0.000261 | -2.615183 |  |
| 7886 | Carcinoma of the Large Intestine | C10orf54     | 0.003149 | -2.612426 |  |
| 7887 | Carcinoma of the Large Intestine | CPA3         | 0        | -2.60624  |  |
| 7888 | Carcinoma of the Large Intestine | NAPEPLD      | 0.001781 | -2.604727 |  |
| 7889 | Carcinoma of the Large Intestine | SMCHD1       | 0.003343 | -2.585213 |  |
| 7890 | Carcinoma of the Large Intestine | EPB41L4B     | 0.000062 | -2.549991 |  |
| 7891 | Carcinoma of the Large Intestine | ETFDH        | 0.003339 | -2.525804 |  |
| 7892 | Carcinoma of the Large Intestine | PIGN         | 0.001057 | -2.524512 |  |
| 7893 | Carcinoma of the Large Intestine | PALLD        | 0.000893 | -2.519625 |  |
| 7894 | Carcinoma of the Large Intestine | CCDC112      | 0.001371 | -2.515317 |  |
| 7895 | Carcinoma of the Large Intestine | ZSWIM6       | 0.003636 | -2.505999 |  |
| 7896 | Carcinoma of the Large Intestine | CASD1        | 0.004245 | -2.501637 |  |
| 7897 | Carcinoma of the Large Intestine | SDCBP2       | 0.000331 | -2.495947 |  |
| 7898 | Carcinoma of the Large Intestine | FUBP1        | 0.000607 | -2.495646 |  |

|      |                                  |          |          |           |  |
|------|----------------------------------|----------|----------|-----------|--|
| 7899 | Carcinoma of the Large Intestine | RNASEL   | 0.004644 | -2.494672 |  |
| 7900 | Carcinoma of the Large Intestine | MYOF     | 0.003778 | -2.488286 |  |
| 7901 | Carcinoma of the Large Intestine | PLD1     | 0.0037   | -2.482875 |  |
| 7902 | Carcinoma of the Large Intestine | AMY2B    | 0.004544 | -2.481498 |  |
| 7903 | Carcinoma of the Large Intestine | FOXF2    | 0        | -2.48074  |  |
| 7904 | Carcinoma of the Large Intestine | TMEM30B  | 0.000555 | -2.470234 |  |
| 7905 | Carcinoma of the Large Intestine | SLCO2A1  | 0.000002 | -2.469144 |  |
| 7906 | Carcinoma of the Large Intestine | CAMK2D   | 0.000541 | -2.468768 |  |
| 7907 | Carcinoma of the Large Intestine | ACAD10   | 0.002237 | -2.454179 |  |
| 7908 | Carcinoma of the Large Intestine | AP4B1    | 0.000582 | -2.447063 |  |
| 7909 | Carcinoma of the Large Intestine | FOXF1    | 0        | -2.435512 |  |
| 7910 | Carcinoma of the Large Intestine | CD74     | 0.037564 | -2.433393 |  |
| 7911 | Carcinoma of the Large Intestine | MYO1C    | 0.003288 | -2.416458 |  |
| 7912 | Carcinoma of the Large Intestine | RBBP4    | 0.004235 | -2.412335 |  |
| 7913 | Carcinoma of the Large Intestine | GLTP     | 0.00293  | -2.401717 |  |
| 7914 | Carcinoma of the Large Intestine | CRYZL1   | 0.004152 | -2.394317 |  |
| 7915 | Carcinoma of the Large Intestine | SYTL4    | 0.001604 | -2.391109 |  |
| 7916 | Carcinoma of the Large Intestine | KIAA1109 | 0.003038 | -2.378572 |  |
| 7917 | Carcinoma of the Large Intestine | PGM5     | 0.000314 | -2.364494 |  |
| 7918 | Carcinoma of the Large Intestine | WDR7     | 0.005167 | -2.346086 |  |
| 7919 | Carcinoma of the Large Intestine | SCARA5   | 0.000025 | -2.332101 |  |
| 7920 | Carcinoma of the Large Intestine | PAPSS2   | 0.004629 | -2.332038 |  |
| 7921 | Carcinoma of the Large Intestine | FAM162A  | 0.00025  | -2.33122  |  |
| 7922 | Carcinoma of the Large Intestine | CCDC14   | 0.00051  | -2.328058 |  |
| 7923 | Carcinoma of the Large Intestine | HNF1B    | 0.003493 | -2.321626 |  |
| 7924 | Carcinoma of the Large Intestine | RABGAP1L | 0.003737 | -2.314043 |  |
| 7925 | Carcinoma of the Large Intestine | C15orf48 | 0.000105 | -2.264361 |  |
| 7926 | Carcinoma of the Large Intestine | EFCAB4B  | 0.004437 | -2.264241 |  |
| 7927 | Carcinoma of the Large Intestine | TSPAN13  | 0.002922 | -2.261416 |  |
| 7928 | Carcinoma of the Large Intestine | AGXT2L2  | 0.00293  | -2.258722 |  |
| 7929 | Carcinoma of the Large Intestine | MAB21L2  | 0.000009 | -2.254028 |  |
| 7930 | Carcinoma of the Large Intestine | NKTR     | 0.002223 | -2.246367 |  |
| 7931 | Carcinoma of the Large Intestine | MS4A8B   | 0.000135 | -2.245197 |  |
| 7932 | Carcinoma of the Large Intestine | EYA3     | 0.046824 | -2.232375 |  |
| 7933 | Carcinoma of the Large Intestine | TMEM43   | 0.004638 | -2.226105 |  |
| 7934 | Carcinoma of the Large Intestine | RGMA     | 0.000001 | -2.216106 |  |
| 7935 | Carcinoma of the Large Intestine | FAM161B  | 0.00488  | -2.207343 |  |
| 7936 | Carcinoma of the Large Intestine | TMIGD    | 0.000335 | -2.196593 |  |
| 7937 | Carcinoma of the Large Intestine | C8orf83  | 0.001854 | -2.182153 |  |
| 7938 | Carcinoma of the Large Intestine | TCF21    | 0        | -2.173875 |  |
| 7939 | Carcinoma of the Large Intestine | DNAJC4   | 0.002861 | -2.171379 |  |
| 7940 | Carcinoma of the Large Intestine | ANKRD36  | 0.005131 | -2.167662 |  |
| 7941 | Carcinoma of the Large Intestine | CTSG     | 0.000001 | -2.15913  |  |
| 7942 | Carcinoma of the Large Intestine | TSPAN7   | 0.000705 | -2.148268 |  |
| 7943 | Carcinoma of the Large Intestine | TMEM54   | 0.000211 | -2.141421 |  |
| 7944 | Carcinoma of the Large Intestine | Q8NBX4   | 0.000102 | -2.127648 |  |
| 7945 | Carcinoma of the Large Intestine | SDCCAG1  | 0.00091  | -2.126706 |  |
| 7946 | Carcinoma of the Large Intestine | ZNF252   | 0.002619 | -2.12491  |  |
| 7947 | Carcinoma of the Large Intestine | FAM200A  | 0.003763 | -2.122202 |  |
| 7948 | Carcinoma of the Large Intestine | NSG1     | 0        | -2.121418 |  |

|      |                                  |           |          |           |  |
|------|----------------------------------|-----------|----------|-----------|--|
| 7949 | Carcinoma of the Large Intestine | RHAG      | 0.046824 | -2.120604 |  |
| 7950 | Carcinoma of the Large Intestine | PLAT      | 0.000028 | -2.107739 |  |
| 7951 | Carcinoma of the Large Intestine | UNC5B     | 0.003512 | -2.103171 |  |
| 7952 | Carcinoma of the Large Intestine | ACAA1     | 0.000802 | -2.099543 |  |
| 7953 | Carcinoma of the Large Intestine | EPCAM     | 0.005086 | -2.095787 |  |
| 7954 | Carcinoma of the Large Intestine | NEUROG3   | 0.000017 | -2.095584 |  |
| 7955 | Carcinoma of the Large Intestine | LOC284454 | 0.004125 | -2.081457 |  |
| 7956 | Carcinoma of the Large Intestine | ECHDC2    | 0.004558 | -2.078043 |  |
| 7957 | Carcinoma of the Large Intestine | ADSV      | 0.000576 | -2.070961 |  |
| 7958 | Carcinoma of the Large Intestine | CD79A     | 0.000427 | -2.069078 |  |
| 7959 | Carcinoma of the Large Intestine | SYNJ2BP   | 0.000369 | -2.059174 |  |
| 7960 | Carcinoma of the Large Intestine | TMSB10    | 0.000217 | -2.0569   |  |
| 7961 | Carcinoma of the Large Intestine | VPS13D    | 0.003805 | -2.055066 |  |
| 7962 | Carcinoma of the Large Intestine | PPP1R13B  | 0.004557 | -2.039713 |  |
| 7963 | Carcinoma of the Large Intestine | GRIN1     | 0.001189 | -2.033231 |  |
| 7964 | Carcinoma of the Large Intestine | MTHFD2L   | 0.004857 | -2.02129  |  |
| 7965 | Carcinoma of the Large Intestine | MALL      | 0.00058  | -2.001755 |  |
| 7966 | Carcinoma of the Large Intestine | CYP2R1    | 0.001404 | -2.000093 |  |
| 7967 | Carcinoma of the Large Intestine | CBX3      | 0.000002 | 2.001406  |  |
| 7968 | Carcinoma of the Large Intestine | ZMYND19   | 0        | 2.00155   |  |
| 7969 | Carcinoma of the Large Intestine | LONP1     | 0        | 2.008715  |  |
| 7970 | Carcinoma of the Large Intestine | RGS12     | 0        | 2.009921  |  |
| 7971 | Carcinoma of the Large Intestine | MTA2      | 0.000001 | 2.010076  |  |
| 7972 | Carcinoma of the Large Intestine | AAA1      | 0        | 2.01351   |  |
| 7973 | Carcinoma of the Large Intestine | KIF15     | 0        | 2.015372  |  |
| 7974 | Carcinoma of the Large Intestine | GOLT1B    | 0        | 2.015554  |  |
| 7975 | Carcinoma of the Large Intestine | RIPK2     | 0        | 2.016821  |  |
| 7976 | Carcinoma of the Large Intestine | MTERFD1   | 0.000001 | 2.018794  |  |
| 7977 | Carcinoma of the Large Intestine | KIF11     | 0.000001 | 2.025286  |  |
| 7978 | Carcinoma of the Large Intestine | NUP107    | 0        | 2.028406  |  |
| 7979 | Carcinoma of the Large Intestine | CCDC59    | 0        | 2.030633  |  |
| 7980 | Carcinoma of the Large Intestine | PSD2      | 0        | 2.036907  |  |
| 7981 | Carcinoma of the Large Intestine | TIMELESS  | 0        | 2.051896  |  |
| 7982 | Carcinoma of the Large Intestine | PHF11     | 0.001695 | 2.062975  |  |
| 7983 | Carcinoma of the Large Intestine | TMEM91    | 0        | 2.063926  |  |
| 7984 | Carcinoma of the Large Intestine | OIP5      | 0.000001 | 2.065998  |  |
| 7985 | Carcinoma of the Large Intestine | KDM2B     | 0.004141 | 2.06911   |  |
| 7986 | Carcinoma of the Large Intestine | RUVBL1    | 0        | 2.069813  |  |
| 7987 | Carcinoma of the Large Intestine | NUP205    | 0.000001 | 2.074642  |  |
| 7988 | Carcinoma of the Large Intestine | STT3A     | 0        | 2.077468  |  |
| 7989 | Carcinoma of the Large Intestine | ENO1      | 0.000002 | 2.078688  |  |
| 7990 | Carcinoma of the Large Intestine | RUVBL2    | 0        | 2.080554  |  |
| 7991 | Carcinoma of the Large Intestine | ADCK4     | 0        | 2.081367  |  |
| 7992 | Carcinoma of the Large Intestine | QPCTL     | 0        | 2.085368  |  |
| 7993 | Carcinoma of the Large Intestine | BPI       | 0        | 2.085919  |  |
| 7994 | Carcinoma of the Large Intestine | RFC5      | 0.000001 | 2.096438  |  |
| 7995 | Carcinoma of the Large Intestine | EPPK1     | 0.000001 | 2.101393  |  |
| 7996 | Carcinoma of the Large Intestine | L3MBTL2   | 0        | 2.106203  |  |
| 7997 | Carcinoma of the Large Intestine | C20orf132 | 0        | 2.106547  |  |
| 7998 | Carcinoma of the Large Intestine | PSMA1     | 0.004439 | 2.107412  |  |

|      |                                  |          |          |          |  |
|------|----------------------------------|----------|----------|----------|--|
| 7999 | Carcinoma of the Large Intestine | SLC25A32 | 0.000001 | 2.113102 |  |
| 8000 | Carcinoma of the Large Intestine | GINS2    | 0.000001 | 2.11675  |  |
| 8001 | Carcinoma of the Large Intestine | NUP85    | 0.000001 | 2.11777  |  |
| 8002 | Carcinoma of the Large Intestine | C1orf107 | 0.002301 | 2.118563 |  |
| 8003 | Carcinoma of the Large Intestine | RBM28    | 0        | 2.120363 |  |
| 8004 | Carcinoma of the Large Intestine | COL18A1  | 0        | 2.120507 |  |
| 8005 | Carcinoma of the Large Intestine | NCAPG2   | 0        | 2.125408 |  |
| 8006 | Carcinoma of the Large Intestine | FCHSD1   | 0        | 2.126384 |  |
| 8007 | Carcinoma of the Large Intestine | CAD      | 0.000001 | 2.127343 |  |
| 8008 | Carcinoma of the Large Intestine | C22orf29 | 0        | 2.132896 |  |
| 8009 | Carcinoma of the Large Intestine | GTF2IRD1 | 0        | 2.133547 |  |
| 8010 | Carcinoma of the Large Intestine | FANCL    | 0        | 2.139324 |  |
| 8011 | Carcinoma of the Large Intestine | GZMB     | 0        | 2.14732  |  |
| 8012 | Carcinoma of the Large Intestine | KIF2C    | 0.000001 | 2.154208 |  |
| 8013 | Carcinoma of the Large Intestine | OAS3     | 0.000001 | 2.155018 |  |
| 8014 | Carcinoma of the Large Intestine | TIE1     | 0        | 2.16211  |  |
| 8015 | Carcinoma of the Large Intestine | PORCN    | 0        | 2.162538 |  |
| 8016 | Carcinoma of the Large Intestine | ANO3     | 0        | 2.166345 |  |
| 8017 | Carcinoma of the Large Intestine | FANCG    | 0        | 2.166676 |  |
| 8018 | Carcinoma of the Large Intestine | CCL4     | 0        | 2.174968 |  |
| 8019 | Carcinoma of the Large Intestine | PDZD2    | 0        | 2.185247 |  |
| 8020 | Carcinoma of the Large Intestine | PCBP3    | 0        | 2.186495 |  |
| 8021 | Carcinoma of the Large Intestine | CPSF4    | 0.000711 | 2.187018 |  |
| 8022 | Carcinoma of the Large Intestine | SLC38A3  | 0        | 2.187399 |  |
| 8023 | Carcinoma of the Large Intestine | RAB15    | 0        | 2.188293 |  |
| 8024 | Carcinoma of the Large Intestine | JAG2     | 0.000001 | 2.191192 |  |
| 8025 | Carcinoma of the Large Intestine | WDR43    | 0.000001 | 2.194866 |  |
| 8026 | Carcinoma of the Large Intestine | C10orf71 | 0        | 2.194946 |  |
| 8027 | Carcinoma of the Large Intestine | CSNK2B   | 0.000285 | 2.197823 |  |
| 8028 | Carcinoma of the Large Intestine | OLR1     | 0.000557 | 2.207088 |  |
| 8029 | Carcinoma of the Large Intestine | GTPBP5   | 0        | 2.213754 |  |
| 8030 | Carcinoma of the Large Intestine | ARIH1    | 0.000605 | 2.21698  |  |
| 8031 | Carcinoma of the Large Intestine | HOXB6    | 0.022575 | 2.220702 |  |
| 8032 | Carcinoma of the Large Intestine | CLCN7    | 0        | 2.234566 |  |
| 8033 | Carcinoma of the Large Intestine | KIF19    | 0        | 2.251696 |  |
| 8034 | Carcinoma of the Large Intestine | POLR1D   | 0.000001 | 2.252838 |  |
| 8035 | Carcinoma of the Large Intestine | PTCD1    | 0        | 2.255095 |  |
| 8036 | Carcinoma of the Large Intestine | KIAA1430 | 0.004953 | 2.262002 |  |
| 8037 | Carcinoma of the Large Intestine | NUP37    | 0.000001 | 2.262069 |  |
| 8038 | Carcinoma of the Large Intestine | FUT8     | 0        | 2.267452 |  |
| 8039 | Carcinoma of the Large Intestine | PITX1    | 0.000001 | 2.26755  |  |
| 8040 | Carcinoma of the Large Intestine | CHD7     | 0.000445 | 2.281194 |  |
| 8041 | Carcinoma of the Large Intestine | CBX4     | 0        | 2.293435 |  |
| 8042 | Carcinoma of the Large Intestine | KIF20A   | 0        | 2.295043 |  |
| 8043 | Carcinoma of the Large Intestine | TMEM109  | 0        | 2.298206 |  |
| 8044 | Carcinoma of the Large Intestine | SLC26A4  | 0        | 2.301524 |  |
| 8045 | Carcinoma of the Large Intestine | MYO1H    | 0        | 2.304578 |  |
| 8046 | Carcinoma of the Large Intestine | MICB     | 0        | 2.307009 |  |
| 8047 | Carcinoma of the Large Intestine | BHLHE22  | 0        | 2.322857 |  |
| 8048 | Carcinoma of the Large Intestine | HS2ST1   | 0.000002 | 2.328743 |  |

|      |                                  |          |          |          |  |
|------|----------------------------------|----------|----------|----------|--|
| 8049 | Carcinoma of the Large Intestine | CECR2    | 0        | 2.332804 |  |
| 8050 | Carcinoma of the Large Intestine | CBFB     | 0        | 2.334836 |  |
| 8051 | Carcinoma of the Large Intestine | CDC42EP1 | 0.000001 | 2.339437 |  |
| 8052 | Carcinoma of the Large Intestine | SORD     | 0.000001 | 2.341712 |  |
| 8053 | Carcinoma of the Large Intestine | POLN     | 0        | 2.353199 |  |
| 8054 | Carcinoma of the Large Intestine | USH2A    | 0        | 2.355116 |  |
| 8055 | Carcinoma of the Large Intestine | NRK      | 0        | 2.357796 |  |
| 8056 | Carcinoma of the Large Intestine | DOK1     | 0        | 2.368591 |  |
| 8057 | Carcinoma of the Large Intestine | AMPD2    | 0        | 2.370905 |  |
| 8058 | Carcinoma of the Large Intestine | COL24A1  | 0        | 2.375741 |  |
| 8059 | Carcinoma of the Large Intestine | HEATR4   | 0        | 2.383003 |  |
| 8060 | Carcinoma of the Large Intestine | MRPS17   | 0.000001 | 2.391333 |  |
| 8061 | Carcinoma of the Large Intestine | KIF9     | 0        | 2.398162 |  |
| 8062 | Carcinoma of the Large Intestine | LY6G6D   | 0        | 2.400382 |  |
| 8063 | Carcinoma of the Large Intestine | NOP56    | 0.000001 | 2.40229  |  |
| 8064 | Carcinoma of the Large Intestine | ZWILCH   | 0        | 2.403617 |  |
| 8065 | Carcinoma of the Large Intestine | CDH26    | 0        | 2.404148 |  |
| 8066 | Carcinoma of the Large Intestine | JAKMIP2  | 0        | 2.406255 |  |
| 8067 | Carcinoma of the Large Intestine | CBS      | 0.000703 | 2.411396 |  |
| 8068 | Carcinoma of the Large Intestine | AOC2     | 0        | 2.41181  |  |
| 8069 | Carcinoma of the Large Intestine | ITGAM    | 0        | 2.411873 |  |
| 8070 | Carcinoma of the Large Intestine | ILF3     | 0.00296  | 2.417933 |  |
| 8071 | Carcinoma of the Large Intestine | RFX4     | 0        | 2.420886 |  |
| 8072 | Carcinoma of the Large Intestine | ARNTL2   | 0        | 2.425129 |  |
| 8073 | Carcinoma of the Large Intestine | ADFP     | 0.00024  | 2.429958 |  |
| 8074 | Carcinoma of the Large Intestine | ANGPTL4  | 0.000173 | 2.440066 |  |
| 8075 | Carcinoma of the Large Intestine | ADAMTSL2 | 0.000012 | 2.453786 |  |
| 8076 | Carcinoma of the Large Intestine | PSAT1    | 0.000001 | 2.45864  |  |
| 8077 | Carcinoma of the Large Intestine | NFE2L3   | 0        | 2.463088 |  |
| 8078 | Carcinoma of the Large Intestine | CSE1L    | 0.000001 | 2.467005 |  |
| 8079 | Carcinoma of the Large Intestine | MAK      | 0        | 2.472108 |  |
| 8080 | Carcinoma of the Large Intestine | EYA1     | 0        | 2.472297 |  |
| 8081 | Carcinoma of the Large Intestine | ANKFN1   | 0        | 2.472601 |  |
| 8082 | Carcinoma of the Large Intestine | C12orf11 | 0        | 2.477935 |  |
| 8083 | Carcinoma of the Large Intestine | KRT39    | 0        | 2.480666 |  |
| 8084 | Carcinoma of the Large Intestine | CARD11   | 0        | 2.480952 |  |
| 8085 | Carcinoma of the Large Intestine | PRDM8    | 0        | 2.481532 |  |
| 8086 | Carcinoma of the Large Intestine | PKD1L3   | 0        | 2.481772 |  |
| 8087 | Carcinoma of the Large Intestine | CA6      | 0        | 2.484544 |  |
| 8088 | Carcinoma of the Large Intestine | VARS     | 0        | 2.490948 |  |
| 8089 | Carcinoma of the Large Intestine | ICAM1    | 0        | 2.498583 |  |
| 8090 | Carcinoma of the Large Intestine | IQCH     | 0        | 2.516142 |  |
| 8091 | Carcinoma of the Large Intestine | CYP1B1   | 0.000314 | 2.525663 |  |
| 8092 | Carcinoma of the Large Intestine | CCDC92   | 0.00358  | 2.52573  |  |
| 8093 | Carcinoma of the Large Intestine | PLD6     | 0.000062 | 2.530931 |  |
| 8094 | Carcinoma of the Large Intestine | NPHP1    | 0        | 2.545304 |  |
| 8095 | Carcinoma of the Large Intestine | CEP250   | 0        | 2.550342 |  |
| 8096 | Carcinoma of the Large Intestine | RAPGEF4  | 0        | 2.551132 |  |
| 8097 | Carcinoma of the Large Intestine | BCL6B    | 0        | 2.554916 |  |
| 8098 | Carcinoma of the Large Intestine | DCC      | 0        | 2.558436 |  |

|      |                                  |           |          |          |  |
|------|----------------------------------|-----------|----------|----------|--|
| 8099 | Carcinoma of the Large Intestine | NALCN     | 0        | 2.560201 |  |
| 8100 | Carcinoma of the Large Intestine | MCM7      | 0        | 2.562626 |  |
| 8101 | Carcinoma of the Large Intestine | PSMB8     | 0.004857 | 2.5672   |  |
| 8102 | Carcinoma of the Large Intestine | UBE2L6    | 0.000001 | 2.570384 |  |
| 8103 | Carcinoma of the Large Intestine | TTC25     | 0        | 2.571125 |  |
| 8104 | Carcinoma of the Large Intestine | PSMG1     | 0.000001 | 2.572526 |  |
| 8105 | Carcinoma of the Large Intestine | TMEM14A   | 0.00296  | 2.575291 |  |
| 8106 | Carcinoma of the Large Intestine | CDC6      | 0        | 2.585624 |  |
| 8107 | Carcinoma of the Large Intestine | AHCY      | 0.000002 | 2.587594 |  |
| 8108 | Carcinoma of the Large Intestine | ABCA13    | 0        | 2.590263 |  |
| 8109 | Carcinoma of the Large Intestine | CCBL1     | 0        | 2.59711  |  |
| 8110 | Carcinoma of the Large Intestine | CASS4     | 0        | 2.601324 |  |
| 8111 | Carcinoma of the Large Intestine | PSAP      | 0.002393 | 2.610683 |  |
| 8112 | Carcinoma of the Large Intestine | CTNBNB1   | 0        | 2.612824 |  |
| 8113 | Carcinoma of the Large Intestine | NPVF      | 0        | 2.613849 |  |
| 8114 | Carcinoma of the Large Intestine | LIN7A     | 0        | 2.628195 |  |
| 8115 | Carcinoma of the Large Intestine | FAM176A   | 0        | 2.634253 |  |
| 8116 | Carcinoma of the Large Intestine | MMP13     | 0        | 2.64178  |  |
| 8117 | Carcinoma of the Large Intestine | FBXL13    | 0        | 2.642704 |  |
| 8118 | Carcinoma of the Large Intestine | FGD5      | 0        | 2.646435 |  |
| 8119 | Carcinoma of the Large Intestine | WDR31     | 0        | 2.648876 |  |
| 8120 | Carcinoma of the Large Intestine | TMEM161A  | 0        | 2.649004 |  |
| 8121 | Carcinoma of the Large Intestine | CCNA2     | 0.000001 | 2.6516   |  |
| 8122 | Carcinoma of the Large Intestine | PPM1F     | 0.001854 | 2.653937 |  |
| 8123 | Carcinoma of the Large Intestine | EIF3B     | 0.001493 | 2.65534  |  |
| 8124 | Carcinoma of the Large Intestine | RHBDF1    | 0.000215 | 2.662688 |  |
| 8125 | Carcinoma of the Large Intestine | ALDH4A1   | 0.000232 | 2.672146 |  |
| 8126 | Carcinoma of the Large Intestine | NEB       | 0        | 2.673266 |  |
| 8127 | Carcinoma of the Large Intestine | ZNF474    | 0        | 2.681025 |  |
| 8128 | Carcinoma of the Large Intestine | MSLN      | 0        | 2.690638 |  |
| 8129 | Carcinoma of the Large Intestine | BOP1      | 0        | 2.693284 |  |
| 8130 | Carcinoma of the Large Intestine | AP1S2     | 0.003236 | 2.693499 |  |
| 8131 | Carcinoma of the Large Intestine | CGNL1     | 0.000004 | 2.694607 |  |
| 8132 | Carcinoma of the Large Intestine | GBP1      | 0        | 2.698104 |  |
| 8133 | Carcinoma of the Large Intestine | CDC25B    | 0.000001 | 2.70041  |  |
| 8134 | Carcinoma of the Large Intestine | EIF2AK2   | 0.004176 | 2.716897 |  |
| 8135 | Carcinoma of the Large Intestine | STAU1     | 0.004644 | 2.717209 |  |
| 8136 | Carcinoma of the Large Intestine | RFC3      | 0        | 2.720527 |  |
| 8137 | Carcinoma of the Large Intestine | XKRX      | 0        | 2.73967  |  |
| 8138 | Carcinoma of the Large Intestine | EIF5A     | 0        | 2.754041 |  |
| 8139 | Carcinoma of the Large Intestine | NPC1L1    | 0        | 2.754101 |  |
| 8140 | Carcinoma of the Large Intestine | FEN1      | 0.000001 | 2.754245 |  |
| 8141 | Carcinoma of the Large Intestine | LOC647979 | 0.004217 | 2.755327 |  |
| 8142 | Carcinoma of the Large Intestine | PTPRU     | 0        | 2.768652 |  |
| 8143 | Carcinoma of the Large Intestine | ABCC2     | 0        | 2.78484  |  |
| 8144 | Carcinoma of the Large Intestine | NCOA3     | 0.003805 | 2.809919 |  |
| 8145 | Carcinoma of the Large Intestine | CAMSAP1L1 | 0.002817 | 2.822373 |  |
| 8146 | Carcinoma of the Large Intestine | CLNK      | 0        | 2.822808 |  |
| 8147 | Carcinoma of the Large Intestine | ADAMTS3   | 0        | 2.824047 |  |
| 8148 | Carcinoma of the Large Intestine | TEAD4     | 0.000001 | 2.833619 |  |

|      |                                  |          |          |          |  |
|------|----------------------------------|----------|----------|----------|--|
| 8149 | Carcinoma of the Large Intestine | LGR5     | 0.000001 | 2.855969 |  |
| 8150 | Carcinoma of the Large Intestine | LMNB2    | 0        | 2.858719 |  |
| 8151 | Carcinoma of the Large Intestine | NT5DC2   | 0        | 2.876001 |  |
| 8152 | Carcinoma of the Large Intestine | EFNA3    | 0        | 2.90539  |  |
| 8153 | Carcinoma of the Large Intestine | HNRNPL   | 0        | 2.905758 |  |
| 8154 | Carcinoma of the Large Intestine | DYX1C1   | 0        | 2.918594 |  |
| 8155 | Carcinoma of the Large Intestine | NNMT     | 0.000273 | 2.93126  |  |
| 8156 | Carcinoma of the Large Intestine | C11orf45 | 0        | 2.931764 |  |
| 8157 | Carcinoma of the Large Intestine | SLC7A5   | 0.000001 | 2.932664 |  |
| 8158 | Carcinoma of the Large Intestine | CFI      | 0.000174 | 2.93439  |  |
| 8159 | Carcinoma of the Large Intestine | MED25    | 0.000405 | 2.953415 |  |
| 8160 | Carcinoma of the Large Intestine | C4orf39  | 0        | 2.956402 |  |
| 8161 | Carcinoma of the Large Intestine | GPX1     | 0.000488 | 2.957755 |  |
| 8162 | Carcinoma of the Large Intestine | INHBE    | 0.000642 | 2.971835 |  |
| 8163 | Carcinoma of the Large Intestine | SHMT2    | 0        | 2.982462 |  |
| 8164 | Carcinoma of the Large Intestine | C10orf10 | 0.000005 | 2.992878 |  |
| 8165 | Carcinoma of the Large Intestine | MAEL     | 0        | 2.996037 |  |
| 8166 | Carcinoma of the Large Intestine | PPP4R4   | 0        | 2.999379 |  |
| 8167 | Carcinoma of the Large Intestine | MACC1    | 0.003549 | 3.024789 |  |
| 8168 | Carcinoma of the Large Intestine | KIF4A    | 0.000001 | 3.052197 |  |
| 8169 | Carcinoma of the Large Intestine | GINS1    | 0        | 3.07162  |  |
| 8170 | Carcinoma of the Large Intestine | F12      | 0        | 3.082553 |  |
| 8171 | Carcinoma of the Large Intestine | EDAR     | 0        | 3.098888 |  |
| 8172 | Carcinoma of the Large Intestine | STAT1    | 0        | 3.107809 |  |
| 8173 | Carcinoma of the Large Intestine | LCA5     | 0        | 3.115799 |  |
| 8174 | Carcinoma of the Large Intestine | TRIP13   | 0        | 3.129853 |  |
| 8175 | Carcinoma of the Large Intestine | RNF219   | 0.000471 | 3.147289 |  |
| 8176 | Carcinoma of the Large Intestine | STK31    | 0        | 3.147914 |  |
| 8177 | Carcinoma of the Large Intestine | F5       | 0.00014  | 3.231423 |  |
| 8178 | Carcinoma of the Large Intestine | CA9      | 0        | 3.241118 |  |
| 8179 | Carcinoma of the Large Intestine | NUTF2    | 0        | 3.241433 |  |
| 8180 | Carcinoma of the Large Intestine | CEP55    | 0        | 3.248565 |  |
| 8181 | Carcinoma of the Large Intestine | SOD2     | 0        | 3.254564 |  |
| 8182 | Carcinoma of the Large Intestine | FOXO1    | 0        | 3.25519  |  |
| 8183 | Carcinoma of the Large Intestine | GRAMD1B  | 0        | 3.261789 |  |
| 8184 | Carcinoma of the Large Intestine | PIWIL1   | 0        | 3.34161  |  |
| 8185 | Carcinoma of the Large Intestine | CERKL    | 0        | 3.342308 |  |
| 8186 | Carcinoma of the Large Intestine | CDH2     | 0        | 3.362404 |  |
| 8187 | Carcinoma of the Large Intestine | BMP7     | 0        | 3.38987  |  |
| 8188 | Carcinoma of the Large Intestine | MCM4     | 0        | 3.415645 |  |
| 8189 | Carcinoma of the Large Intestine | TACSTD2  | 0        | 3.446898 |  |
| 8190 | Carcinoma of the Large Intestine | MIF      | 0.000001 | 3.504093 |  |
| 8191 | Carcinoma of the Large Intestine | GPSM2    | 0.000018 | 3.562648 |  |
| 8192 | Carcinoma of the Large Intestine | IFIT5    | 0.002833 | 3.586507 |  |
| 8193 | Carcinoma of the Large Intestine | VNN1     | 0.000533 | 3.670827 |  |
| 8194 | Carcinoma of the Large Intestine | PBK      | 0.000001 | 3.714962 |  |
| 8195 | Carcinoma of the Large Intestine | SIM2     | 0        | 3.727166 |  |
| 8196 | Carcinoma of the Large Intestine | NKD1     | 0        | 3.731564 |  |
| 8197 | Carcinoma of the Large Intestine | KLK6     | 0        | 3.733988 |  |
| 8198 | Carcinoma of the Large Intestine | ECT2     | 0        | 3.796085 |  |

|      |                                  |          |          |          |  |
|------|----------------------------------|----------|----------|----------|--|
| 8199 | Carcinoma of the Large Intestine | APOE     | 0        | 3.797515 |  |
| 8200 | Carcinoma of the Large Intestine | TMPRSS3  | 0        | 3.798986 |  |
| 8201 | Carcinoma of the Large Intestine | MMP11    | 0        | 3.817899 |  |
| 8202 | Carcinoma of the Large Intestine | TMEM97   | 0        | 3.826889 |  |
| 8203 | Carcinoma of the Large Intestine | KCNJ15   | 0        | 3.837106 |  |
| 8204 | Carcinoma of the Large Intestine | B3GALTL  | 0.049356 | 3.840546 |  |
| 8205 | Carcinoma of the Large Intestine | AQP9     | 0.000053 | 3.849158 |  |
| 8206 | Carcinoma of the Large Intestine | HSD11B1  | 0.000121 | 3.932743 |  |
| 8207 | Carcinoma of the Large Intestine | PMAIP1   | 0        | 4.0525   |  |
| 8208 | Carcinoma of the Large Intestine | CLDN2    | 0        | 4.07628  |  |
| 8209 | Carcinoma of the Large Intestine | CXCL9    | 0        | 4.116745 |  |
| 8210 | Carcinoma of the Large Intestine | IL24     | 0        | 4.120371 |  |
| 8211 | Carcinoma of the Large Intestine | FTL      | 0.003014 | 4.124829 |  |
| 8212 | Carcinoma of the Large Intestine | IFITM1   | 0        | 4.28338  |  |
| 8213 | Carcinoma of the Large Intestine | ASGR2    | 0.000553 | 4.302714 |  |
| 8214 | Carcinoma of the Large Intestine | SERPINA5 | 0.000352 | 4.345646 |  |
| 8215 | Carcinoma of the Large Intestine | SRPX2    | 0        | 4.507537 |  |
| 8216 | Carcinoma of the Large Intestine | CD81     | 0.00447  | 4.590045 |  |
| 8217 | Carcinoma of the Large Intestine | OLFML2B  | 0        | 4.638492 |  |
| 8218 | Carcinoma of the Large Intestine | SULT2A1  | 0.000605 | 4.720173 |  |
| 8219 | Carcinoma of the Large Intestine | FMO3     | 0.000071 | 4.720673 |  |
| 8220 | Carcinoma of the Large Intestine | SERPINF2 | 0.00067  | 4.841546 |  |
| 8221 | Carcinoma of the Large Intestine | CXCL10   | 0        | 4.8737   |  |
| 8222 | Carcinoma of the Large Intestine | SLCO1B3  | 0        | 5.007902 |  |
| 8223 | Carcinoma of the Large Intestine | DACH1    | 0.001964 | 5.017765 |  |
| 8224 | Carcinoma of the Large Intestine | CXCL1    | 0        | 5.226033 |  |
| 8225 | Carcinoma of the Large Intestine | COLEC11  | 0        | 5.278582 |  |
| 8226 | Carcinoma of the Large Intestine | COL1A2   | 0        | 5.292898 |  |
| 8227 | Carcinoma of the Large Intestine | CP       | 0.00038  | 5.509002 |  |
| 8228 | Carcinoma of the Large Intestine | CPB2     | 0.000432 | 5.613978 |  |
| 8229 | Carcinoma of the Large Intestine | C3       | 0.000006 | 5.668511 |  |
| 8230 | Carcinoma of the Large Intestine | SLC13A5  | 0.000331 | 6.076943 |  |
| 8231 | Carcinoma of the Large Intestine | C8A      | 0.000531 | 6.120991 |  |
| 8232 | Carcinoma of the Large Intestine | SRSF6    | 0.000001 | 6.156758 |  |
| 8233 | Carcinoma of the Large Intestine | DSC3     | 0        | 6.40146  |  |
| 8234 | Carcinoma of the Large Intestine | MMP12    | 0        | 6.617377 |  |
| 8235 | Carcinoma of the Large Intestine | RBP4     | 0.000557 | 6.658636 |  |
| 8236 | Carcinoma of the Large Intestine | ASGR1    | 0.000048 | 6.679332 |  |
| 8237 | Carcinoma of the Large Intestine | C5       | 0.00011  | 6.687382 |  |
| 8238 | Carcinoma of the Large Intestine | APOH     | 0.000429 | 6.75181  |  |
| 8239 | Carcinoma of the Large Intestine | FCN3     | 0.000009 | 6.844049 |  |
| 8240 | Carcinoma of the Large Intestine | APOC2    | 0.000051 | 6.904064 |  |
| 8241 | Carcinoma of the Large Intestine | AGXT     | 0.000773 | 6.935567 |  |
| 8242 | Carcinoma of the Large Intestine | HPD      | 0.000531 | 7.014538 |  |
| 8243 | Carcinoma of the Large Intestine | C6       | 0.00046  | 7.054535 |  |
| 8244 | Carcinoma of the Large Intestine | SAA4     | 0.000529 | 7.065    |  |
| 8245 | Carcinoma of the Large Intestine | CXCL3    | 0        | 7.233392 |  |
| 8246 | Carcinoma of the Large Intestine | PLG      | 0.000498 | 7.361402 |  |
| 8247 | Carcinoma of the Large Intestine | ITIH1    | 0.000337 | 7.554118 |  |
| 8248 | Carcinoma of the Large Intestine | ZAK      | 0.000658 | 7.747274 |  |



|      |                                  |           |          |             |  |
|------|----------------------------------|-----------|----------|-------------|--|
| 8249 | Carcinoma of the Large Intestine | C4BPA     | 0.000535 | 7.948833    |  |
| 8250 | Carcinoma of the Large Intestine | APOC1     | 0.000001 | 8.000367    |  |
| 8251 | Carcinoma of the Large Intestine | TTR       | 0.000676 | 8.109081    |  |
| 8252 | Carcinoma of the Large Intestine | CYP2C8    | 0.000673 | 8.207707    |  |
| 8253 | Carcinoma of the Large Intestine | DSG3      | 0        | 8.93798     |  |
| 8254 | Carcinoma of the Large Intestine | LBP       | 0.000127 | 8.984359    |  |
| 8255 | Carcinoma of the Large Intestine | HAMP      | 0.000059 | 9.033264    |  |
| 8256 | Carcinoma of the Large Intestine | IL1A      | 0        | 9.050041    |  |
| 8257 | Carcinoma of the Large Intestine | TCN1      | 0        | 9.094781    |  |
| 8258 | Carcinoma of the Large Intestine | KRT23     | 0        | 9.22809     |  |
| 8259 | Carcinoma of the Large Intestine | APCS      | 0.000082 | 9.596353    |  |
| 8260 | Carcinoma of the Large Intestine | KNG1      | 0.000331 | 10.388199   |  |
| 8261 | Carcinoma of the Large Intestine | HRG       | 0.000312 | 11.044669   |  |
| 8262 | Carcinoma of the Large Intestine | SERPINC1  | 0.000285 | 11.791284   |  |
| 8263 | Carcinoma of the Large Intestine | SERPINA3  | 0.000001 | 11.942192   |  |
| 8264 | Carcinoma of the Large Intestine | APOB      | 0.000088 | 13.0809     |  |
| 8265 | Carcinoma of the Large Intestine | AHSG      | 0.000112 | 13.371622   |  |
| 8266 | Carcinoma of the Large Intestine | APOC3     | 0.000181 | 13.701454   |  |
| 8267 | Carcinoma of the Large Intestine | HPX       | 0.000192 | 14.287143   |  |
| 8268 | Carcinoma of the Large Intestine | FGG       | 0.000014 | 14.651355   |  |
| 8269 | Carcinoma of the Large Intestine | F2        | 0.000047 | 15.443368   |  |
| 8270 | Carcinoma of the Large Intestine | VTN       | 0.000044 | 15.844447   |  |
| 8271 | Carcinoma of the Large Intestine | ORM2      | 0.00009  | 16.094898   |  |
| 8272 | Carcinoma of the Large Intestine | CYP2E1    | 0.000072 | 16.227626   |  |
| 8273 | Carcinoma of the Large Intestine | FGL1      | 0.000039 | 18.32827    |  |
| 8274 | Carcinoma of the Large Intestine | TF        | 0.000068 | 18.608249   |  |
| 8275 | Carcinoma of the Large Intestine | GC        | 0.000013 | 20.947027   |  |
| 8276 | Carcinoma of the Large Intestine | AMBP      | 0.000021 | 21.099729   |  |
| 8277 | Carcinoma of the Large Intestine | APOA2     | 0.000023 | 21.365529   |  |
| 8278 | Carcinoma of the Large Intestine | HP        | 0.000009 | 21.852969   |  |
| 8279 | Carcinoma of the Large Intestine | ALB       | 0.000007 | 23.019959   |  |
| 8280 | Carcinoma of the Large Intestine | APOA1     | 0.000018 | 23.169381   |  |
| 8281 | Carcinoma of the Large Intestine | FGB       | 0.000008 | 23.984148   |  |
| 8282 | Carcinoma of the Large Intestine | FGA       | 0.000008 | 25.158992   |  |
| 8283 | Carcinoma of the Large Intestine | CRP       | 0.000002 | 25.311911   |  |
| 8284 | Carcinoma of the Large Intestine | ORM1      | 0.000008 | 25.514711   |  |
| 8285 | Carcinoma, Ductal, Breast        | ENOSF1    | 0.04975  | -2.163659   |  |
| 8286 | Carcinoma, Ductal, Breast        | LOC728448 | 0.004106 | 2.432727    |  |
| 8287 | Carcinoma, Ductal, Breast        | TCERG1    | 0.047633 | 2.472226    |  |
| 8288 | Carcinoma, Papillary             | FABP1     | 0        | -1907.03953 |  |
| 8289 | Carcinoma, Papillary             | CEACAM5   | 0        | -234.186195 |  |
| 8290 | Carcinoma, Papillary             | CEACAM6   | 0        | -196.986603 |  |
| 8291 | Carcinoma, Papillary             | MUC12     | 0        | -147.031096 |  |
| 8292 | Carcinoma, Papillary             | LGALS4    | 0        | -133.938134 |  |
| 8293 | Carcinoma, Papillary             | OLFM4     | 0        | -132.620855 |  |
| 8294 | Carcinoma, Papillary             | GPX2      | 0        | -127.021925 |  |
| 8295 | Carcinoma, Papillary             | SLC26A3   | 0        | -122.746328 |  |
| 8296 | Carcinoma, Papillary             | CEACAM7   | 0        | -109.698036 |  |
| 8297 | Carcinoma, Papillary             | CLCA1     | 0        | -94.02019   |  |
| 8298 | Carcinoma, Papillary             | REG4      | 0        | -90.92623   |  |

|      |                      |             |          |            |  |
|------|----------------------|-------------|----------|------------|--|
| 8299 | Carcinoma, Papillary | CDH17       | 0        | -90.475329 |  |
| 8300 | Carcinoma, Papillary | S100P       | 0        | -87.011091 |  |
| 8301 | Carcinoma, Papillary | CLRN3       | 0        | -85.084843 |  |
| 8302 | Carcinoma, Papillary | MUC13       | 0        | -80.78052  |  |
| 8303 | Carcinoma, Papillary | DEFA6       | 0.000001 | -69.423082 |  |
| 8304 | Carcinoma, Papillary | REG1B       | 0        | -68.002356 |  |
| 8305 | Carcinoma, Papillary | ZG16        | 0        | -67.278447 |  |
| 8306 | Carcinoma, Papillary | NOX1        | 0        | -63.09699  |  |
| 8307 | Carcinoma, Papillary | TFF3        | 0        | -60.824063 |  |
| 8308 | Carcinoma, Papillary | ALDOB       | 0.000065 | -60.651111 |  |
| 8309 | Carcinoma, Papillary | KRT20       | 0        | -60.542768 |  |
| 8310 | Carcinoma, Papillary | REG1A       | 0        | -55.481058 |  |
| 8311 | Carcinoma, Papillary | MUC2        | 0        | -47.110146 |  |
| 8312 | Carcinoma, Papillary | LOC646627   | 0        | -46.907823 |  |
| 8313 | Carcinoma, Papillary | FERMT1      | 0        | -46.804189 |  |
| 8314 | Carcinoma, Papillary | SPINK1      | 0        | -45.571975 |  |
| 8315 | Carcinoma, Papillary | MMP3        | 0        | -43.145098 |  |
| 8316 | Carcinoma, Papillary | SPINK4      | 0        | -41.336371 |  |
| 8317 | Carcinoma, Papillary | TRIM31      | 0        | -40.91445  |  |
| 8318 | Carcinoma, Papillary | C10orf99    | 0        | -39.48309  |  |
| 8319 | Carcinoma, Papillary | MEP1A       | 0        | -39.010654 |  |
| 8320 | Carcinoma, Papillary | ADH1C       | 0        | -38.897862 |  |
| 8321 | Carcinoma, Papillary | REG3A       | 0        | -37.386354 |  |
| 8322 | Carcinoma, Papillary | CCL20       | 0        | -37.225024 |  |
| 8323 | Carcinoma, Papillary | UGT2B17     | 0        | -37.166028 |  |
| 8324 | Carcinoma, Papillary | MMP12       | 0        | -35.405148 |  |
| 8325 | Carcinoma, Papillary | VIL1        | 0        | -34.559985 |  |
| 8326 | Carcinoma, Papillary | MUC4        | 0        | -31.860587 |  |
| 8327 | Carcinoma, Papillary | ITLN1       | 0        | -31.223227 |  |
| 8328 | Carcinoma, Papillary | RETNLB      | 0        | -30.930316 |  |
| 8329 | Carcinoma, Papillary | DUOX2       | 0        | -29.770406 |  |
| 8330 | Carcinoma, Papillary | CCL14-CCL15 | 0        | -29.181088 |  |
| 8331 | Carcinoma, Papillary | CFTR        | 0        | -28.559981 |  |
| 8332 | Carcinoma, Papillary | CDX2        | 0        | -27.888768 |  |
| 8333 | Carcinoma, Papillary | HNF4A       | 0        | -27.391584 |  |
| 8334 | Carcinoma, Papillary | TFF1        | 0        | -27.36202  |  |
| 8335 | Carcinoma, Papillary | CDX1        | 0        | -25.96671  |  |
| 8336 | Carcinoma, Papillary | MS4A12      | 0        | -25.165937 |  |
| 8337 | Carcinoma, Papillary | EPS8L3      | 0        | -24.243884 |  |
| 8338 | Carcinoma, Papillary | FUT6        | 0        | -24.21147  |  |
| 8339 | Carcinoma, Papillary | TDGF1       | 0        | -23.01447  |  |
| 8340 | Carcinoma, Papillary | AREG        | 0        | -20.623005 |  |
| 8341 | Carcinoma, Papillary | PLAC8       | 0        | -20.435763 |  |
| 8342 | Carcinoma, Papillary | CXCL5       | 0        | -20.354652 |  |
| 8343 | Carcinoma, Papillary | GPA33       | 0        | -20.076328 |  |
| 8344 | Carcinoma, Papillary | IL8         | 0        | -19.986084 |  |
| 8345 | Carcinoma, Papillary | DEFA5       | 0        | -19.416091 |  |
| 8346 | Carcinoma, Papillary | ATP10B      | 0        | -19.304022 |  |
| 8347 | Carcinoma, Papillary | TFF2        | 0        | -18.889391 |  |
| 8348 | Carcinoma, Papillary | ANXA13      | 0        | -18.712436 |  |

|      |                      |            |          |            |  |
|------|----------------------|------------|----------|------------|--|
| 8349 | Carcinoma, Papillary | NAT2       | 0        | -18.580529 |  |
| 8350 | Carcinoma, Papillary | DPEP1      | 0        | -18.280346 |  |
| 8351 | Carcinoma, Papillary | COL17A1    | 0        | -18.089649 |  |
| 8352 | Carcinoma, Papillary | TOX3       | 0        | -18.043021 |  |
| 8353 | Carcinoma, Papillary | NR1I2      | 0        | -17.97656  |  |
| 8354 | Carcinoma, Papillary | CLCA4      | 0        | -17.954325 |  |
| 8355 | Carcinoma, Papillary | CEACAM1    | 0        | -17.498997 |  |
| 8356 | Carcinoma, Papillary | NCRNA00261 | 0        | -16.558295 |  |
| 8357 | Carcinoma, Papillary | RAPGEFL1   | 0        | -16.546089 |  |
| 8358 | Carcinoma, Papillary | CYP2B6     | 0        | -16.479378 |  |
| 8359 | Carcinoma, Papillary | PCSK1      | 0        | -16.077903 |  |
| 8360 | Carcinoma, Papillary | HSD17B2    | 0        | -15.879286 |  |
| 8361 | Carcinoma, Papillary | PIGR       | 0        | -15.791576 |  |
| 8362 | Carcinoma, Papillary | HYAL1      | 0        | -15.769106 |  |
| 8363 | Carcinoma, Papillary | CEL        | 0        | -15.73894  |  |
| 8364 | Carcinoma, Papillary | CDHR5      | 0        | -15.360779 |  |
| 8365 | Carcinoma, Papillary | ABP1       | 0        | -15.284525 |  |
| 8366 | Carcinoma, Papillary | DUOXA2     | 0        | -14.076323 |  |
| 8367 | Carcinoma, Papillary | DMBT1      | 0        | -14.059784 |  |
| 8368 | Carcinoma, Papillary | C2orf89    | 0        | -13.913439 |  |
| 8369 | Carcinoma, Papillary | CCL24      | 0        | -13.868413 |  |
| 8370 | Carcinoma, Papillary | POF1B      | 0        | -13.783513 |  |
| 8371 | Carcinoma, Papillary | FAM55D     | 0        | -13.713159 |  |
| 8372 | Carcinoma, Papillary | TCN1       | 0        | -13.703881 |  |
| 8373 | Carcinoma, Papillary | LY6G6D     | 0        | -13.265429 |  |
| 8374 | Carcinoma, Papillary | CXCL3      | 0        | -12.963999 |  |
| 8375 | Carcinoma, Papillary | GUCY2C     | 0        | -12.854353 |  |
| 8376 | Carcinoma, Papillary | ABCC2      | 0        | -12.749951 |  |
| 8377 | Carcinoma, Papillary | ASCL2      | 0        | -12.637184 |  |
| 8378 | Carcinoma, Papillary | PRSS3      | 0        | -12.609422 |  |
| 8379 | Carcinoma, Papillary | RNF186     | 0        | -12.384311 |  |
| 8380 | Carcinoma, Papillary | LEFTY1     | 0        | -12.355129 |  |
| 8381 | Carcinoma, Papillary | ITGA2      | 0        | -12.007321 |  |
| 8382 | Carcinoma, Papillary | UGT2A3     | 0        | -11.883993 |  |
| 8383 | Carcinoma, Papillary | ETS2       | 0        | -11.746334 |  |
| 8384 | Carcinoma, Papillary | CDCA7      | 0        | -11.650209 |  |
| 8385 | Carcinoma, Papillary | LRRC19     | 0        | -11.632686 |  |
| 8386 | Carcinoma, Papillary | IYD        | 0.000002 | -11.449527 |  |
| 8387 | Carcinoma, Papillary | CAPN8      | 0        | -11.387377 |  |
| 8388 | Carcinoma, Papillary | TMPRSS4    | 0        | -11.347615 |  |
| 8389 | Carcinoma, Papillary | LGR5       | 0        | -11.340232 |  |
| 8390 | Carcinoma, Papillary | ARL14      | 0        | -11.298451 |  |
| 8391 | Carcinoma, Papillary | CYP4F12    | 0        | -11.258556 |  |
| 8392 | Carcinoma, Papillary | PPARG      | 0        | -11.068195 |  |
| 8393 | Carcinoma, Papillary | FLJ32063   | 0        | -10.914528 |  |
| 8394 | Carcinoma, Papillary | C15orf48   | 0        | -10.898246 |  |
| 8395 | Carcinoma, Papillary | C13orf18   | 0        | -10.846061 |  |
| 8396 | Carcinoma, Papillary | CPA6       | 0        | -10.780454 |  |
| 8397 | Carcinoma, Papillary | PLA2G2A    | 0        | -10.777462 |  |
| 8398 | Carcinoma, Papillary | CYP3A5     | 0        | -10.613874 |  |

|      |                      |              |          |            |  |
|------|----------------------|--------------|----------|------------|--|
| 8399 | Carcinoma, Papillary | SLC39A5      | 0        | -10.592831 |  |
| 8400 | Carcinoma, Papillary | WNK4         | 0        | -10.53082  |  |
| 8401 | Carcinoma, Papillary | MYO7B        | 0        | -10.519156 |  |
| 8402 | Carcinoma, Papillary | IHH          | 0        | -10.483387 |  |
| 8403 | Carcinoma, Papillary | USH1C        | 0.000001 | -10.298427 |  |
| 8404 | Carcinoma, Papillary | KIAA1755     | 0        | -10.290099 |  |
| 8405 | Carcinoma, Papillary | CHP2         | 0        | -10.288031 |  |
| 8406 | Carcinoma, Papillary | AQP8         | 0        | -10.17501  |  |
| 8407 | Carcinoma, Papillary | C1orf125     | 0        | -10.171498 |  |
| 8408 | Carcinoma, Papillary | SDR16C5      | 0        | -10.152288 |  |
| 8409 | Carcinoma, Papillary | CDHR1        | 0        | -10.120138 |  |
| 8410 | Carcinoma, Papillary | EREG         | 0        | -10.109754 |  |
| 8411 | Carcinoma, Papillary | DDC          | 0.000007 | -9.987592  |  |
| 8412 | Carcinoma, Papillary | LOC283859    | 0        | -9.895492  |  |
| 8413 | Carcinoma, Papillary | C4BPB        | 0        | -9.851183  |  |
| 8414 | Carcinoma, Papillary | CELP         | 0        | -9.82629   |  |
| 8415 | Carcinoma, Papillary | LOC100506781 | 0        | -9.674363  |  |
| 8416 | Carcinoma, Papillary | TRIM15       | 0        | -9.533264  |  |
| 8417 | Carcinoma, Papillary | LCN2         | 0        | -9.502444  |  |
| 8418 | Carcinoma, Papillary | ACE2         | 0        | -9.380392  |  |
| 8419 | Carcinoma, Papillary | FCGBP        | 0        | -9.244394  |  |
| 8420 | Carcinoma, Papillary | FUT3         | 0        | -9.228442  |  |
| 8421 | Carcinoma, Papillary | ACSL5        | 0        | -9.186695  |  |
| 8422 | Carcinoma, Papillary | FAM3D        | 0.000028 | -9.18585   |  |
| 8423 | Carcinoma, Papillary | MUC17        | 0        | -9.023207  |  |
| 8424 | Carcinoma, Papillary | GPR120       | 0        | -8.956525  |  |
| 8425 | Carcinoma, Papillary | HSD11B2      | 0        | -8.89267   |  |
| 8426 | Carcinoma, Papillary | XPNPEP2      | 0        | -8.60786   |  |
| 8427 | Carcinoma, Papillary | OVOL1        | 0        | -8.597389  |  |
| 8428 | Carcinoma, Papillary | GUCA2A       | 0        | -8.587404  |  |
| 8429 | Carcinoma, Papillary | VIP          | 0        | -8.555389  |  |
| 8430 | Carcinoma, Papillary | HEPACAM2     | 0        | -8.44935   |  |
| 8431 | Carcinoma, Papillary | TNMD         | 0.000003 | -8.338848  |  |
| 8432 | Carcinoma, Papillary | ISX          | 0        | -8.188952  |  |
| 8433 | Carcinoma, Papillary | GPSM2        | 0        | -8.184673  |  |
| 8434 | Carcinoma, Papillary | HES6         | 0        | -8.085848  |  |
| 8435 | Carcinoma, Papillary | PRAP1        | 0.000001 | -8.080921  |  |
| 8436 | Carcinoma, Papillary | GIPC2        | 0.000048 | -8.040863  |  |
| 8437 | Carcinoma, Papillary | FCRL2        | 0        | -8.032766  |  |
| 8438 | Carcinoma, Papillary | TNS4         | 0        | -7.977346  |  |
| 8439 | Carcinoma, Papillary | CALML4       | 0        | -7.974588  |  |
| 8440 | Carcinoma, Papillary | BTNL8        | 0        | -7.914229  |  |
| 8441 | Carcinoma, Papillary | HEPH         | 0        | -7.911607  |  |
| 8442 | Carcinoma, Papillary | FREM1        | 0        | -7.902116  |  |
| 8443 | Carcinoma, Papillary | CTSE         | 0        | -7.893692  |  |
| 8444 | Carcinoma, Papillary | DHRS9        | 0        | -7.647905  |  |
| 8445 | Carcinoma, Papillary | ACSL6        | 0        | -7.63187   |  |
| 8446 | Carcinoma, Papillary | HKDC1        | 0        | -7.545197  |  |
| 8447 | Carcinoma, Papillary | GPRC5A       | 0.000001 | -7.533718  |  |
| 8448 | Carcinoma, Papillary | LRP4         | 0        | -7.396141  |  |

|      |                      |           |          |           |  |
|------|----------------------|-----------|----------|-----------|--|
| 8449 | Carcinoma, Papillary | GUCA2B    | 0        | -7.370613 |  |
| 8450 | Carcinoma, Papillary | GREM1     | 0        | -7.366178 |  |
| 8451 | Carcinoma, Papillary | BCL2L15   | 0        | -7.282307 |  |
| 8452 | Carcinoma, Papillary | AGT       | 0        | -7.263824 |  |
| 8453 | Carcinoma, Papillary | GNLY      | 0        | -7.242917 |  |
| 8454 | Carcinoma, Papillary | CDA       | 0.000027 | -7.127235 |  |
| 8455 | Carcinoma, Papillary | PRR15     | 0.000003 | -7.030772 |  |
| 8456 | Carcinoma, Papillary | CA4       | 0        | -7.001725 |  |
| 8457 | Carcinoma, Papillary | SLC12A2   | 0.000057 | -6.97687  |  |
| 8458 | Carcinoma, Papillary | L1TD1     | 0        | -6.788547 |  |
| 8459 | Carcinoma, Papillary | FUT4      | 0        | -6.776435 |  |
| 8460 | Carcinoma, Papillary | MAB21L2   | 0.000005 | -6.769377 |  |
| 8461 | Carcinoma, Papillary | BCL2L14   | 0.000052 | -6.735917 |  |
| 8462 | Carcinoma, Papillary | ITPKA     | 0        | -6.714468 |  |
| 8463 | Carcinoma, Papillary | FAR2      | 0        | -6.656479 |  |
| 8464 | Carcinoma, Papillary | CA1       | 0        | -6.653338 |  |
| 8465 | Carcinoma, Papillary | ADAMDEC1  | 0.000001 | -6.623965 |  |
| 8466 | Carcinoma, Papillary | A1CF      | 0        | -6.592665 |  |
| 8467 | Carcinoma, Papillary | SERPINB1  | 0        | -6.495901 |  |
| 8468 | Carcinoma, Papillary | PIP5K1B   | 0.000023 | -6.487347 |  |
| 8469 | Carcinoma, Papillary | GMDS      | 0.000011 | -6.419386 |  |
| 8470 | Carcinoma, Papillary | BAIAP2L2  | 0        | -6.385218 |  |
| 8471 | Carcinoma, Papillary | FGFR4     | 0        | -6.3624   |  |
| 8472 | Carcinoma, Papillary | ADCYAP1   | 0        | -6.313629 |  |
| 8473 | Carcinoma, Papillary | GPR109B   | 0        | -6.245199 |  |
| 8474 | Carcinoma, Papillary | SLCO1B3   | 0        | -6.222918 |  |
| 8475 | Carcinoma, Papillary | CHRD12    | 0.000088 | -6.219112 |  |
| 8476 | Carcinoma, Papillary | C2CD4A    | 0.000007 | -6.16549  |  |
| 8477 | Carcinoma, Papillary | CCL18     | 0        | -6.16452  |  |
| 8478 | Carcinoma, Papillary | KLF4      | 0        | -6.113691 |  |
| 8479 | Carcinoma, Papillary | IGJ       | 0.000002 | -6.019768 |  |
| 8480 | Carcinoma, Papillary | HNF4G     | 0.000022 | -6.002455 |  |
| 8481 | Carcinoma, Papillary | ANG       | 0        | -5.987403 |  |
| 8482 | Carcinoma, Papillary | ADH6      | 0.000059 | -5.964809 |  |
| 8483 | Carcinoma, Papillary | GSDMB     | 0        | -5.963061 |  |
| 8484 | Carcinoma, Papillary | PLEK2     | 0        | -5.873165 |  |
| 8485 | Carcinoma, Papillary | SLC25A15  | 0        | -5.806055 |  |
| 8486 | Carcinoma, Papillary | TNFRSF11A | 0        | -5.780951 |  |
| 8487 | Carcinoma, Papillary | HBEGF     | 0.000001 | -5.731401 |  |
| 8488 | Carcinoma, Papillary | NOTUM     | 0        | -5.67124  |  |
| 8489 | Carcinoma, Papillary | DUSP27    | 0.000001 | -5.65128  |  |
| 8490 | Carcinoma, Papillary | MLLT4     | 0        | -5.609246 |  |
| 8491 | Carcinoma, Papillary | KLF5      | 0.000089 | -5.584101 |  |
| 8492 | Carcinoma, Papillary | IL1A      | 0.000031 | -5.502987 |  |
| 8493 | Carcinoma, Papillary | GPR128    | 0        | -5.484955 |  |
| 8494 | Carcinoma, Papillary | MYO1A     | 0.000007 | -5.46119  |  |
| 8495 | Carcinoma, Papillary | PROX1     | 0        | -5.446828 |  |
| 8496 | Carcinoma, Papillary | ATOH1     | 0        | -5.444901 |  |
| 8497 | Carcinoma, Papillary | ATP2A3    | 0        | -5.40515  |  |
| 8498 | Carcinoma, Papillary | IL1RN     | 0        | -5.399412 |  |

|      |                      |              |          |           |  |
|------|----------------------|--------------|----------|-----------|--|
| 8499 | Carcinoma, Papillary | MYB          | 0.000031 | -5.339766 |  |
| 8500 | Carcinoma, Papillary | RNASE4       | 0.000054 | -5.303132 |  |
| 8501 | Carcinoma, Papillary | AIM1L        | 0.000001 | -5.271137 |  |
| 8502 | Carcinoma, Papillary | CYP4F2       | 0.000017 | -5.248093 |  |
| 8503 | Carcinoma, Papillary | EDN3         | 0.000015 | -5.20948  |  |
| 8504 | Carcinoma, Papillary | PAPPA        | 0        | -5.186495 |  |
| 8505 | Carcinoma, Papillary | FAM55A       | 0        | -5.170335 |  |
| 8506 | Carcinoma, Papillary | ADAMTS8      | 0        | -5.087833 |  |
| 8507 | Carcinoma, Papillary | SYTL5        | 0.000001 | -5.074791 |  |
| 8508 | Carcinoma, Papillary | SLC1A7       | 0        | -5.056292 |  |
| 8509 | Carcinoma, Papillary | JPH1         | 0.000003 | -5.036581 |  |
| 8510 | Carcinoma, Papillary | FAM84A       | 0.000001 | -4.927383 |  |
| 8511 | Carcinoma, Papillary | C11orf96     | 0.000004 | -4.926027 |  |
| 8512 | Carcinoma, Papillary | BCAN         | 0        | -4.91567  |  |
| 8513 | Carcinoma, Papillary | RNF43        | 0.000004 | -4.902531 |  |
| 8514 | Carcinoma, Papillary | GGH          | 0        | -4.831501 |  |
| 8515 | Carcinoma, Papillary | MTMR11       | 0        | -4.816396 |  |
| 8516 | Carcinoma, Papillary | CYP2C18      | 0        | -4.781955 |  |
| 8517 | Carcinoma, Papillary | SKP2         | 0.000001 | -4.764183 |  |
| 8518 | Carcinoma, Papillary | PLN          | 0.000003 | -4.763244 |  |
| 8519 | Carcinoma, Papillary | SLC6A14      | 0.000001 | -4.753219 |  |
| 8520 | Carcinoma, Papillary | PCCA         | 0        | -4.727795 |  |
| 8521 | Carcinoma, Papillary | PPP1R14D     | 0        | -4.715926 |  |
| 8522 | Carcinoma, Papillary | SPAG1        | 0        | -4.707864 |  |
| 8523 | Carcinoma, Papillary | ASB2         | 0.000001 | -4.66307  |  |
| 8524 | Carcinoma, Papillary | ISG20        | 0.000001 | -4.65649  |  |
| 8525 | Carcinoma, Papillary | PTGER4       | 0        | -4.62419  |  |
| 8526 | Carcinoma, Papillary | PTPRO        | 0.000003 | -4.514872 |  |
| 8527 | Carcinoma, Papillary | LOC400573    | 0        | -4.508623 |  |
| 8528 | Carcinoma, Papillary | FLJ22763     | 0.000047 | -4.477473 |  |
| 8529 | Carcinoma, Papillary | THBS1        | 0.000034 | -4.455782 |  |
| 8530 | Carcinoma, Papillary | CXorf57      | 0.000034 | -4.444357 |  |
| 8531 | Carcinoma, Papillary | SMAGP        | 0.000002 | -4.443238 |  |
| 8532 | Carcinoma, Papillary | CLC          | 0.000042 | -4.303155 |  |
| 8533 | Carcinoma, Papillary | IL22RA1      | 0        | -4.298135 |  |
| 8534 | Carcinoma, Papillary | GGT5         | 0        | -4.261632 |  |
| 8535 | Carcinoma, Papillary | IL3RA        | 0        | -4.248029 |  |
| 8536 | Carcinoma, Papillary | NOSTRIN      | 0.00002  | -4.238162 |  |
| 8537 | Carcinoma, Papillary | MXD1         | 0.000001 | -4.230895 |  |
| 8538 | Carcinoma, Papillary | CCDC68       | 0        | -4.210842 |  |
| 8539 | Carcinoma, Papillary | KRT6B        | 0        | -4.201677 |  |
| 8540 | Carcinoma, Papillary | LOC100507192 | 0.000018 | -4.201003 |  |
| 8541 | Carcinoma, Papillary | C21orf58     | 0.000007 | -4.20044  |  |
| 8542 | Carcinoma, Papillary | CTLA4        | 0        | -4.16658  |  |
| 8543 | Carcinoma, Papillary | LOC727924    | 0.000004 | -4.093745 |  |
| 8544 | Carcinoma, Papillary | IL1B         | 0        | -3.996748 |  |
| 8545 | Carcinoma, Papillary | TRABD        | 0        | -3.995177 |  |
| 8546 | Carcinoma, Papillary | KRTAP1-3     | 0        | -3.981206 |  |
| 8547 | Carcinoma, Papillary | CCL22        | 0        | -3.94827  |  |
| 8548 | Carcinoma, Papillary | NEK3         | 0        | -3.934227 |  |

|      |                      |              |          |           |  |
|------|----------------------|--------------|----------|-----------|--|
| 8549 | Carcinoma, Papillary | DNASE1L3     | 0        | -3.928455 |  |
| 8550 | Carcinoma, Papillary | C19orf6      | 0        | -3.927157 |  |
| 8551 | Carcinoma, Papillary | FGF10        | 0.000002 | -3.831623 |  |
| 8552 | Carcinoma, Papillary | MYH14        | 0        | -3.763604 |  |
| 8553 | Carcinoma, Papillary | IL21R        | 0.000002 | -3.754832 |  |
| 8554 | Carcinoma, Papillary | DIO3-OS      | 0        | -3.739599 |  |
| 8555 | Carcinoma, Papillary | PITPNM2      | 0.000033 | -3.726033 |  |
| 8556 | Carcinoma, Papillary | DPEP2        | 0.000001 | -3.658076 |  |
| 8557 | Carcinoma, Papillary | GEM          | 0        | -3.655963 |  |
| 8558 | Carcinoma, Papillary | CXCL6        | 0.000003 | -3.568917 |  |
| 8559 | Carcinoma, Papillary | CYP4F3       | 0.000001 | -3.521572 |  |
| 8560 | Carcinoma, Papillary | ADAP1        | 0.000014 | -3.518351 |  |
| 8561 | Carcinoma, Papillary | PREP         | 0.000056 | -3.476493 |  |
| 8562 | Carcinoma, Papillary | SLC13A3      | 0.000001 | -3.459158 |  |
| 8563 | Carcinoma, Papillary | UCA1         | 0.000022 | -3.439624 |  |
| 8564 | Carcinoma, Papillary | LOC100288781 | 0.000016 | -3.392744 |  |
| 8565 | Carcinoma, Papillary | GNG4         | 0.000013 | -3.38225  |  |
| 8566 | Carcinoma, Papillary | AGPAT4       | 0.000011 | -3.370208 |  |
| 8567 | Carcinoma, Papillary | STAMBPL1     | 0.000029 | -3.276841 |  |
| 8568 | Carcinoma, Papillary | ABCC3        | 0.000092 | -3.276345 |  |
| 8569 | Carcinoma, Papillary | LOC100130776 | 0        | -3.246003 |  |
| 8570 | Carcinoma, Papillary | FGGY         | 0        | -3.244354 |  |
| 8571 | Carcinoma, Papillary | NAT8         | 0.00002  | -3.243067 |  |
| 8572 | Carcinoma, Papillary | NR4A1        | 0.000013 | -3.238111 |  |
| 8573 | Carcinoma, Papillary | APOH         | 0.000062 | -3.237986 |  |
| 8574 | Carcinoma, Papillary | VNN3         | 0        | -3.232821 |  |
| 8575 | Carcinoma, Papillary | FUT2         | 0.000052 | -3.227239 |  |
| 8576 | Carcinoma, Papillary | SLC44A3      | 0.000001 | -3.221509 |  |
| 8577 | Carcinoma, Papillary | HMMR         | 0.000007 | -3.186672 |  |
| 8578 | Carcinoma, Papillary | EZR          | 0.000052 | -3.156803 |  |
| 8579 | Carcinoma, Papillary | RBP2         | 0.000024 | -3.085531 |  |
| 8580 | Carcinoma, Papillary | CPS1-IT      | 0.000003 | -3.06693  |  |
| 8581 | Carcinoma, Papillary | LOC25845     | 0        | -3.055152 |  |
| 8582 | Carcinoma, Papillary | SLC26A2      | 0        | -3.017912 |  |
| 8583 | Carcinoma, Papillary | FCGR3B       | 0.000039 | -3.007925 |  |
| 8584 | Carcinoma, Papillary | PIGZ         | 0        | -2.983579 |  |
| 8585 | Carcinoma, Papillary | FLJ40292     | 0.000011 | -2.979467 |  |
| 8586 | Carcinoma, Papillary | LOC146336    | 0.000004 | -2.970969 |  |
| 8587 | Carcinoma, Papillary | KLK15        | 0.000001 | -2.960357 |  |
| 8588 | Carcinoma, Papillary | MYO1D        | 0        | -2.95017  |  |
| 8589 | Carcinoma, Papillary | AOC3         | 0.000028 | -2.93578  |  |
| 8590 | Carcinoma, Papillary | TRPM6        | 0.000002 | -2.917801 |  |
| 8591 | Carcinoma, Papillary | APOBEC1      | 0.000029 | -2.89506  |  |
| 8592 | Carcinoma, Papillary | ZCCHC4       | 0.000001 | -2.88691  |  |
| 8593 | Carcinoma, Papillary | FNDCA        | 0.000034 | -2.874024 |  |
| 8594 | Carcinoma, Papillary | CACNA1H      | 0.000035 | -2.872445 |  |
| 8595 | Carcinoma, Papillary | CACNA2D1     | 0.000002 | -2.866887 |  |
| 8596 | Carcinoma, Papillary | LGALS3       | 0.000015 | -2.855915 |  |
| 8597 | Carcinoma, Papillary | SEMA4G       | 0.000032 | -2.846607 |  |
| 8598 | Carcinoma, Papillary | LOC730102    | 0        | -2.826886 |  |

|      |                      |           |          |            |  |
|------|----------------------|-----------|----------|------------|--|
| 8599 | Carcinoma, Papillary | SLC7A5    | 0.000071 | -2.807862  |  |
| 8600 | Carcinoma, Papillary | LDB3      | 0.000059 | -2.782039  |  |
| 8601 | Carcinoma, Papillary | GRIN2B    | 0.000032 | -2.761053  |  |
| 8602 | Carcinoma, Papillary | AKAP1     | 0.000042 | -2.754207  |  |
| 8603 | Carcinoma, Papillary | ALG2      | 0        | -2.720427  |  |
| 8604 | Carcinoma, Papillary | TUBA4A    | 0.000002 | -2.672017  |  |
| 8605 | Carcinoma, Papillary | ENPP3     | 0.000006 | -2.663276  |  |
| 8606 | Carcinoma, Papillary | ZFR2      | 0        | -2.597847  |  |
| 8607 | Carcinoma, Papillary | ELF1      | 0        | -2.591772  |  |
| 8608 | Carcinoma, Papillary | MFI2      | 0        | -2.579749  |  |
| 8609 | Carcinoma, Papillary | CDT1      | 0.000017 | -2.575066  |  |
| 8610 | Carcinoma, Papillary | GNE       | 0.000001 | -2.530543  |  |
| 8611 | Carcinoma, Papillary | PLEKHG6   | 0        | -2.51952   |  |
| 8612 | Carcinoma, Papillary | PIWIL1    | 0.00002  | -2.515579  |  |
| 8613 | Carcinoma, Papillary | NR6A1     | 0        | -2.484779  |  |
| 8614 | Carcinoma, Papillary | C20orf152 | 0        | -2.456379  |  |
| 8615 | Carcinoma, Papillary | FRYL      | 0        | -2.448948  |  |
| 8616 | Carcinoma, Papillary | CCNB2     | 0.000009 | -2.401553  |  |
| 8617 | Carcinoma, Papillary | MDGA1     | 0.000001 | -2.39211   |  |
| 8618 | Carcinoma, Papillary | SH3D20    | 0.000002 | -2.390295  |  |
| 8619 | Carcinoma, Papillary | ASPH      | 0        | -2.356866  |  |
| 8620 | Carcinoma, Papillary | EDAR      | 0.000007 | -2.345715  |  |
| 8621 | Carcinoma, Papillary | EXOSC8    | 0.000081 | -2.328203  |  |
| 8622 | Carcinoma, Papillary | 3-Mar     | 0.000001 | -2.292671  |  |
| 8623 | Carcinoma, Papillary | LASS6     | 0        | -2.280427  |  |
| 8624 | Carcinoma, Papillary | ZAK       | 0        | -2.26803   |  |
| 8625 | Carcinoma, Papillary | TXLNG     | 0.000001 | -2.247802  |  |
| 8626 | Carcinoma, Papillary | CELF4     | 0.000024 | -2.205617  |  |
| 8627 | Carcinoma, Papillary | LLGL2     | 0.000058 | -2.200024  |  |
| 8628 | Carcinoma, Papillary | RFC3      | 0.000059 | -2.175271  |  |
| 8629 | Carcinoma, Papillary | GTF3A     | 0        | -2.132585  |  |
| 8630 | Carcinoma, Papillary | LEPR      | 0.000049 | -2.094402  |  |
| 8631 | Carcinoma, Papillary | AKR7A3    | 0.000007 | -2.091531  |  |
| 8632 | Carcinoma, Papillary | PRRG4     | 0.000001 | -2.079988  |  |
| 8633 | Carcinoma, Papillary | C12orf75  | 0.000015 | -2.062463  |  |
| 8634 | Carcinoma, Papillary | FBRS      | 0        | -2.042991  |  |
| 8635 | Carcinoma, Papillary | ZFP36L2   | 0.000014 | -2.027757  |  |
| 8636 | Carcinoma, Papillary | CADM4     | 0        | 2.577503   |  |
| 8637 | Catenins             | REG1A     | 0.000149 | -36.576833 |  |
| 8638 | Catenins             | AKAP12    | 0.000382 | -19.882979 |  |
| 8639 | Catenins             | SERPINB5  | 0.00007  | -14.794114 |  |
| 8640 | Catenins             | FAM129A   | 0.000243 | -14.358025 |  |
| 8641 | Catenins             | MT1M      | 0.000016 | -11.080972 |  |
| 8642 | Catenins             | PRUNE2    | 0.000015 | -9.361624  |  |
| 8643 | Catenins             | BAT3      | 0.000087 | -9.181054  |  |
| 8644 | Catenins             | ZNF204P   | 0.000614 | -8.492386  |  |
| 8645 | Catenins             | SPIN3     | 0.000147 | -7.489164  |  |
| 8646 | Catenins             | ZNF426    | 0.000112 | -5.90991   |  |
| 8647 | Catenins             | ZNF558    | 0.000114 | -5.356884  |  |
| 8648 | Catenins             | LIMCH1    | 0.000303 | -4.710667  |  |



|      |          |              |          |           |  |
|------|----------|--------------|----------|-----------|--|
| 8649 | Catenins | SYNJ2        | 0.000382 | -4.635881 |  |
| 8650 | Catenins | UGT1A6       | 0.000406 | -4.496336 |  |
| 8651 | Catenins | PTGR1        | 0.000001 | -4.486203 |  |
| 8652 | Catenins | FAM50B       | 0.000018 | -4.335119 |  |
| 8653 | Catenins | LOC100505875 | 0.000492 | -4.152001 |  |
| 8654 | Catenins | TPRXL        | 0.00018  | -4.054795 |  |
| 8655 | Catenins | RTTN         | 0.000002 | -3.816143 |  |
| 8656 | Catenins | TUG1         | 0.000015 | -3.752775 |  |
| 8657 | Catenins | INO80C       | 0.000135 | -3.731187 |  |
| 8658 | Catenins | ESYT2        | 0.000458 | -3.665878 |  |
| 8659 | Catenins | RHOU         | 0.000078 | -3.614124 |  |
| 8660 | Catenins | TNRC18       | 0.000082 | -3.412363 |  |
| 8661 | Catenins | ATXN1        | 0.000166 | -3.387009 |  |
| 8662 | Catenins | PIK3C3       | 0.000003 | -3.343665 |  |
| 8663 | Catenins | TXNDC9       | 0.000143 | -3.328385 |  |
| 8664 | Catenins | DSC2         | 0.000018 | -3.231242 |  |
| 8665 | Catenins | MECOM        | 0.000112 | -3.198311 |  |
| 8666 | Catenins | ING2         | 0.000177 | -3.185976 |  |
| 8667 | Catenins | TTC39C       | 0.00052  | -3.154439 |  |
| 8668 | Catenins | ARGLU1       | 0.000279 | -3.146774 |  |
| 8669 | Catenins | DNAJB6       | 0.00007  | -3.07301  |  |
| 8670 | Catenins | PIGN         | 0.000049 | -3.062276 |  |
| 8671 | Catenins | MSN          | 0.000121 | -3.047942 |  |
| 8672 | Catenins | ALDH3A1      | 0.00048  | -3.025803 |  |
| 8673 | Catenins | ASH1L        | 0.000058 | -2.991166 |  |
| 8674 | Catenins | SEPW1        | 0.000014 | -2.899693 |  |
| 8675 | Catenins | PRRG4        | 0.000001 | -2.878893 |  |
| 8676 | Catenins | HOXB7        | 0.000109 | -2.850091 |  |
| 8677 | Catenins | NBN          | 0.000065 | -2.803623 |  |
| 8678 | Catenins | SLC16A1      | 0.000175 | -2.715163 |  |
| 8679 | Catenins | MRPL35       | 0.000564 | -2.712121 |  |
| 8680 | Catenins | SGCB         | 0.000015 | -2.689522 |  |
| 8681 | Catenins | TM9SF3       | 0.000143 | -2.59314  |  |
| 8682 | Catenins | ZCCHC2       | 0.000382 | -2.590748 |  |
| 8683 | Catenins | ZNF271       | 0.000626 | -2.562873 |  |
| 8684 | Catenins | HOXA13       | 0.000143 | -2.550304 |  |
| 8685 | Catenins | UBE3C        | 0.000058 | -2.522976 |  |
| 8686 | Catenins | DSG2         | 0.000062 | -2.460754 |  |
| 8687 | Catenins | ZC3H13       | 0.00008  | -2.449023 |  |
| 8688 | Catenins | VAPB         | 0.000259 | -2.433886 |  |
| 8689 | Catenins | SUGT1        | 0.000413 | -2.430777 |  |
| 8690 | Catenins | DOLPP1       | 0.000064 | -2.403751 |  |
| 8691 | Catenins | GPS2         | 0.000015 | -2.357439 |  |
| 8692 | Catenins | GAPVD1       | 0.000259 | -2.351562 |  |
| 8693 | Catenins | HIST1H1C     | 0.000058 | -2.309695 |  |
| 8694 | Catenins | FAM91A2      | 0.000614 | -2.287029 |  |
| 8695 | Catenins | ROD1         | 0.000114 | -2.270856 |  |
| 8696 | Catenins | VAPA         | 0.000437 | -2.236095 |  |
| 8697 | Catenins | FRG1         | 0.000112 | -2.210131 |  |
| 8698 | Catenins | YTHDC2       | 0.000096 | -2.176141 |  |

|      |          |             |          |           |  |
|------|----------|-------------|----------|-----------|--|
| 8699 | Catenins | PSMD5       | 0.000018 | -2.135035 |  |
| 8700 | Catenins | ARPC5L      | 0.000064 | -2.134362 |  |
| 8701 | Catenins | UPF3A       | 0.000487 | -2.116966 |  |
| 8702 | Catenins | MAPRE2      | 0.000392 | -2.088331 |  |
| 8703 | Catenins | GGCX        | 0.000191 | -2.075676 |  |
| 8704 | Catenins | FAM122B     | 0.000129 | -2.05692  |  |
| 8705 | Catenins | RB1         | 0.000078 | -2.05352  |  |
| 8706 | Catenins | GPR107      | 0.000266 | -2.051135 |  |
| 8707 | Catenins | TMEM50A     | 0.000259 | -2.047113 |  |
| 8708 | Catenins | SH3BGRL2    | 0.000259 | -2.031019 |  |
| 8709 | Catenins | C17orf85    | 0.000287 | -2.030274 |  |
| 8710 | Catenins | MBD4        | 0.000087 | -2.02786  |  |
| 8711 | Catenins | MYST3       | 0.000605 | -2.012837 |  |
| 8712 | Catenins | HN1         | 0.000033 | -2.003492 |  |
| 8713 | Catenins | TMEM18      | 0.000257 | 2.026822  |  |
| 8714 | Catenins | ZFP62       | 0.000058 | 2.032576  |  |
| 8715 | Catenins | C2orf28     | 0.00052  | 2.041845  |  |
| 8716 | Catenins | C1orf57     | 0.000615 | 2.042778  |  |
| 8717 | Catenins | MAGED1      | 0.000376 | 2.073153  |  |
| 8718 | Catenins | EXOSC1      | 0.000259 | 2.075314  |  |
| 8719 | Catenins | SLC17A9     | 0.000143 | 2.079349  |  |
| 8720 | Catenins | TAF1D       | 0.00007  | 2.095709  |  |
| 8721 | Catenins | PREPL       | 0.000058 | 2.095728  |  |
| 8722 | Catenins | MIPEP       | 0.00007  | 2.116788  |  |
| 8723 | Catenins | SLC39A4     | 0.000378 | 2.128275  |  |
| 8724 | Catenins | CHST3       | 0.000407 | 2.132689  |  |
| 8725 | Catenins | C6orf108    | 0.000196 | 2.158936  |  |
| 8726 | Catenins | GBAS        | 0.000367 | 2.202874  |  |
| 8727 | Catenins | BIRC6       | 0.000564 | 2.20328   |  |
| 8728 | Catenins | TIMM8B      | 0.000254 | 2.230223  |  |
| 8729 | Catenins | SCCPDH      | 0.000259 | 2.231617  |  |
| 8730 | Catenins | ARL2        | 0.000607 | 2.246019  |  |
| 8731 | Catenins | FRAT2       | 0.000418 | 2.247018  |  |
| 8732 | Catenins | TPD52L1     | 0.000315 | 2.270668  |  |
| 8733 | Catenins | ARPC3       | 0.000612 | 2.271593  |  |
| 8734 | Catenins | HSBP1L1     | 0.000067 | 2.281044  |  |
| 8735 | Catenins | ATP5G2      | 0.000259 | 2.290497  |  |
| 8736 | Catenins | ANKHD1-EIF4 | 0.000437 | 2.305972  |  |
| 8737 | Catenins | RBCK1       | 0.000486 | 2.340571  |  |
| 8738 | Catenins | KIAA0141    | 0.000179 | 2.349644  |  |
| 8739 | Catenins | AGPHD1      | 0.000091 | 2.36445   |  |
| 8740 | Catenins | ZFAND2B     | 0.000489 | 2.366606  |  |
| 8741 | Catenins | EIF4B       | 0.000312 | 2.381829  |  |
| 8742 | Catenins | CXXC5       | 0.000079 | 2.389303  |  |
| 8743 | Catenins | SLC38A10    | 0.000553 | 2.412111  |  |
| 8744 | Catenins | GART        | 0.000434 | 2.418457  |  |
| 8745 | Catenins | WDR4        | 0.000532 | 2.42595   |  |
| 8746 | Catenins | PYGL        | 0.000602 | 2.427988  |  |
| 8747 | Catenins | SLC25A6     | 0.00034  | 2.434351  |  |
| 8748 | Catenins | SNORD104    | 0.000624 | 2.440978  |  |

|      |          |           |          |          |  |
|------|----------|-----------|----------|----------|--|
| 8749 | Catenins | TBC1D1    | 0.000308 | 2.448241 |  |
| 8750 | Catenins | C4orf14   | 0.000437 | 2.47461  |  |
| 8751 | Catenins | GDF11     | 0.000432 | 2.480144 |  |
| 8752 | Catenins | DPY30     | 0.000143 | 2.4865   |  |
| 8753 | Catenins | MARVELD1  | 0.000568 | 2.514161 |  |
| 8754 | Catenins | NOB1      | 0.000553 | 2.523267 |  |
| 8755 | Catenins | SMARCD3   | 0.000128 | 2.530565 |  |
| 8756 | Catenins | C9orf86   | 0.000367 | 2.540431 |  |
| 8757 | Catenins | SLC25A21  | 0.000271 | 2.542119 |  |
| 8758 | Catenins | DYRK4     | 0.00007  | 2.615305 |  |
| 8759 | Catenins | HAUS4     | 0.000177 | 2.620348 |  |
| 8760 | Catenins | RPL13A    | 0.000331 | 2.645398 |  |
| 8761 | Catenins | WDYHV1    | 0.000235 | 2.653118 |  |
| 8762 | Catenins | GAS5      | 0.000142 | 2.653625 |  |
| 8763 | Catenins | GAMT      | 0.000143 | 2.666422 |  |
| 8764 | Catenins | SH3YL1    | 0.000002 | 2.683318 |  |
| 8765 | Catenins | ALDOC     | 0.000382 | 2.711191 |  |
| 8766 | Catenins | KLK12     | 0.000259 | 2.740593 |  |
| 8767 | Catenins | PKIG      | 0.000445 | 2.741006 |  |
| 8768 | Catenins | CNDP2     | 0.00012  | 2.744491 |  |
| 8769 | Catenins | RPL35A    | 0.000129 | 2.785454 |  |
| 8770 | Catenins | DNAJC4    | 0.000125 | 2.793849 |  |
| 8771 | Catenins | DPH5      | 0.000437 | 2.807949 |  |
| 8772 | Catenins | SH2D2A    | 0.000499 | 2.836379 |  |
| 8773 | Catenins | CLN3      | 0.000412 | 2.84375  |  |
| 8774 | Catenins | MMS19     | 0.000018 | 2.84468  |  |
| 8775 | Catenins | C9orf40   | 0.000602 | 2.854545 |  |
| 8776 | Catenins | KRTCAP3   | 0.000414 | 2.902283 |  |
| 8777 | Catenins | ARHGEF10  | 0.000279 | 2.912243 |  |
| 8778 | Catenins | LOC255512 | 0.000361 | 2.94404  |  |
| 8779 | Catenins | CPS1      | 0.000002 | 2.967478 |  |
| 8780 | Catenins | ATP13A2   | 0.0002   | 3.004528 |  |
| 8781 | Catenins | ASPHD2    | 0.000341 | 3.03538  |  |
| 8782 | Catenins | MDK       | 0.000446 | 3.092344 |  |
| 8783 | Catenins | ATPBD4    | 0.000112 | 3.109684 |  |
| 8784 | Catenins | THNSL1    | 0.000149 | 3.124434 |  |
| 8785 | Catenins | HYI       | 0.000441 | 3.155569 |  |
| 8786 | Catenins | KAZ       | 0.000187 | 3.209017 |  |
| 8787 | Catenins | NEO1      | 0.000564 | 3.231681 |  |
| 8788 | Catenins | KLF11     | 0.000219 | 3.248634 |  |
| 8789 | Catenins | HSPB1     | 0.00007  | 3.269693 |  |
| 8790 | Catenins | AIFM3     | 0.000228 | 3.295077 |  |
| 8791 | Catenins | AGMAT     | 0.000114 | 3.339683 |  |
| 8792 | Catenins | ATP6V1E2  | 0.000492 | 3.370556 |  |
| 8793 | Catenins | NAGS      | 0.00012  | 3.375294 |  |
| 8794 | Catenins | NOX1      | 0.000279 | 3.434399 |  |
| 8795 | Catenins | C19orf45  | 0.000612 | 3.436083 |  |
| 8796 | Catenins | PCCA      | 0.000125 | 3.463857 |  |
| 8797 | Catenins | LOC729680 | 0.000244 | 3.501818 |  |
| 8798 | Catenins | ARHGAP32  | 0.00003  | 3.550023 |  |

|      |          |              |          |           |  |
|------|----------|--------------|----------|-----------|--|
| 8799 | Catenins | CNFN         | 0.000266 | 3.585442  |  |
| 8800 | Catenins | FLJ41757     | 0.00048  | 3.605058  |  |
| 8801 | Catenins | LTBP3        | 0.000002 | 3.619344  |  |
| 8802 | Catenins | FAM119A      | 0.000005 | 3.765769  |  |
| 8803 | Catenins | PROCR        | 0.000259 | 3.835196  |  |
| 8804 | Catenins | MCCC1        | 0.000187 | 3.848696  |  |
| 8805 | Catenins | FADS2        | 0.000551 | 3.903226  |  |
| 8806 | Catenins | LOC283104    | 0.000279 | 4.155987  |  |
| 8807 | Catenins | GXYLT2       | 0.000569 | 4.264637  |  |
| 8808 | Catenins | FSCN1        | 0.000014 | 4.370552  |  |
| 8809 | Catenins | FLJ36031     | 0.000142 | 4.480278  |  |
| 8810 | Catenins | ZNF358       | 0.000279 | 4.585557  |  |
| 8811 | Catenins | PHLDA3       | 0.00002  | 4.586603  |  |
| 8812 | Catenins | RAB26        | 0.000042 | 4.644335  |  |
| 8813 | Catenins | SHH          | 0.000143 | 4.677488  |  |
| 8814 | Catenins | FLJ37644     | 0.000413 | 4.712144  |  |
| 8815 | Catenins | CDC42EP5     | 0.000176 | 4.798045  |  |
| 8816 | Catenins | PDGFC        | 0.000001 | 4.989535  |  |
| 8817 | Catenins | MXRA7        | 0.000001 | 4.994552  |  |
| 8818 | Catenins | SORBS3       | 0.000259 | 5.101449  |  |
| 8819 | Catenins | GALNT12      | 0.000082 | 5.173536  |  |
| 8820 | Catenins | C1QTNF1      | 0.000228 | 5.327957  |  |
| 8821 | Catenins | C4orf19      | 0.000367 | 5.339512  |  |
| 8822 | Catenins | LMF1         | 0.000513 | 5.430435  |  |
| 8823 | Catenins | APH1B        | 0.000114 | 5.553459  |  |
| 8824 | Catenins | ABCC4        | 0.000219 | 5.561098  |  |
| 8825 | Catenins | TCF4         | 0.000341 | 5.712788  |  |
| 8826 | Catenins | PRODH        | 0.000408 | 5.875641  |  |
| 8827 | Catenins | ZNF704       | 0.000142 | 5.88162   |  |
| 8828 | Catenins | C11orf30     | 0.000021 | 5.900891  |  |
| 8829 | Catenins | CDH3         | 0.000564 | 5.904728  |  |
| 8830 | Catenins | MRAS         | 0.000002 | 5.970402  |  |
| 8831 | Catenins | IL1F7        | 0.000275 | 5.996226  |  |
| 8832 | Catenins | GPR124       | 0.000137 | 6.185279  |  |
| 8833 | Catenins | SLC6A10P     | 0.000156 | 6.252374  |  |
| 8834 | Catenins | WNT4         | 0.000393 | 6.517647  |  |
| 8835 | Catenins | DLX2         | 0.000271 | 6.697201  |  |
| 8836 | Catenins | FUT1         | 0.000219 | 6.783496  |  |
| 8837 | Catenins | C11orf53     | 0.000115 | 7.249453  |  |
| 8838 | Catenins | C11orf93     | 0.000061 | 7.250724  |  |
| 8839 | Catenins | KLC3         | 0.000382 | 7.331104  |  |
| 8840 | Catenins | CIB2         | 0.000564 | 8.107981  |  |
| 8841 | Catenins | RAC3         | 0.000196 | 8.302583  |  |
| 8842 | Catenins | RHBDL1       | 0.000075 | 8.661224  |  |
| 8843 | Catenins | TNFRSF18     | 0.000187 | 9.901515  |  |
| 8844 | Catenins | GNAL         | 0.00003  | 11.805769 |  |
| 8845 | Catenins | NPL          | 0.000551 | 12.480296 |  |
| 8846 | Catenins | LOC100289026 | 0.000015 | 13.35725  |  |
| 8847 | Catenins | PARVG        | 0.00005  | 15.210227 |  |
| 8848 | Catenins | TLE2         | 0.000486 | 15.588353 |  |

|      |                         |           |          |            |  |
|------|-------------------------|-----------|----------|------------|--|
| 8849 | Catenins                | ABCB1     | 0.000482 | 18.547662  |  |
| 8850 | Catenins                | UNC5A     | 0.000607 | 21.517442  |  |
| 8851 | Catenins                | EPB41L3   | 0.000351 | 22.172662  |  |
| 8852 | Catenins                | TCEA3     | 0.000058 | 23.553522  |  |
| 8853 | Catenins                | LITAF     | 0.000053 | 26.621554  |  |
| 8854 | Catenins                | ZIC2      | 0.000437 | 31.843284  |  |
| 8855 | Catenins                | PXDN      | 0.00003  | 34.689751  |  |
| 8856 | Catenins                | CYB5A     | 0.000114 | 497.719424 |  |
| 8857 | Cell Culture Techniques | MAP7      | 0.000652 | -7.749575  |  |
| 8858 | Cell Culture Techniques | MAPK13    | 0.000093 | -5.139744  |  |
| 8859 | Cell Culture Techniques | ROD1      | 0.000155 | -4.802888  |  |
| 8860 | Cell Culture Techniques | RAB3IP    | 0.000218 | -4.603243  |  |
| 8861 | Cell Culture Techniques | WWP1      | 0.000529 | -3.9455    |  |
| 8862 | Cell Culture Techniques | RNASET2   | 0.000088 | -3.751019  |  |
| 8863 | Cell Culture Techniques | PPFIBP2   | 0.000541 | -3.362162  |  |
| 8864 | Cell Culture Techniques | BAZ2B     | 0.000375 | -3.040968  |  |
| 8865 | Cell Culture Techniques | CYP2R1    | 0.000348 | -2.97435   |  |
| 8866 | Cell Culture Techniques | PHIP      | 0.00018  | -2.916824  |  |
| 8867 | Cell Culture Techniques | OCIAD2    | 0.000516 | -2.862596  |  |
| 8868 | Cell Culture Techniques | SYK       | 0.000144 | -2.815386  |  |
| 8869 | Cell Culture Techniques | KIF21A    | 0.000493 | -2.764031  |  |
| 8870 | Cell Culture Techniques | LOC387921 | 0.000603 | -2.703054  |  |
| 8871 | Cell Culture Techniques | SLC25A5   | 0.000533 | -2.551182  |  |
| 8872 | Cell Culture Techniques | MRPS35    | 0.000166 | -2.52774   |  |
| 8873 | Cell Culture Techniques | PPIG      | 0.000425 | -2.505525  |  |
| 8874 | Cell Culture Techniques | GUSB      | 0.00007  | -2.451689  |  |
| 8875 | Cell Culture Techniques | ANXA4     | 0.000425 | -2.440149  |  |
| 8876 | Cell Culture Techniques | ZNF165    | 0.000062 | -2.402117  |  |
| 8877 | Cell Culture Techniques | TMEM41B   | 0.000615 | -2.399405  |  |
| 8878 | Cell Culture Techniques | ZNF721    | 0.000664 | -2.377136  |  |
| 8879 | Cell Culture Techniques | ZNF800    | 0.000597 | -2.347068  |  |
| 8880 | Cell Culture Techniques | C4ORF16   | 0.000093 | -2.332935  |  |
| 8881 | Cell Culture Techniques | FLJ34969  | 0.000597 | -2.282324  |  |
| 8882 | Cell Culture Techniques | CCDC76    | 0.000599 | -2.225771  |  |
| 8883 | Cell Culture Techniques | TARDBP    | 0.000574 | -2.221869  |  |
| 8884 | Cell Culture Techniques | RNF141    | 0.000516 | -2.206677  |  |
| 8885 | Cell Culture Techniques | C11ORF71  | 0.000545 | -2.102567  |  |
| 8886 | Cell Culture Techniques | RPS24     | 0.000286 | -2.072647  |  |
| 8887 | Cell Culture Techniques | DGKD      | 0.000219 | -2.026221  |  |
| 8888 | Cell Culture Techniques | RPL5      | 0.000282 | -2.004885  |  |
| 8889 | Cell Culture Techniques | RGS10     | 0.000375 | 2.006736   |  |
| 8890 | Cell Culture Techniques | CCDC127   | 0.000514 | 2.023144   |  |
| 8891 | Cell Culture Techniques | RBMS2     | 0.000284 | 2.071696   |  |
| 8892 | Cell Culture Techniques | TNFAIP1   | 0.000398 | 2.089194   |  |
| 8893 | Cell Culture Techniques | GAPDH     | 0.000425 | 2.158625   |  |
| 8894 | Cell Culture Techniques | ADAMTSL5  | 0.000486 | 2.27493    |  |
| 8895 | Cell Culture Techniques | NPR2      | 0.000399 | 2.282587   |  |
| 8896 | Cell Culture Techniques | SDF4      | 0.000665 | 2.289924   |  |
| 8897 | Cell Culture Techniques | MST150    | 0.000125 | 2.311495   |  |
| 8898 | Cell Culture Techniques | SEC22C    | 0.000369 | 2.345013   |  |

|      |                         |              |          |            |  |
|------|-------------------------|--------------|----------|------------|--|
| 8899 | Cell Culture Techniques | NTAN1        | 0.00061  | 2.400488   |  |
| 8900 | Cell Culture Techniques | RIC8A        | 0.000436 | 2.464435   |  |
| 8901 | Cell Culture Techniques | ZBTB4        | 0.000201 | 2.481596   |  |
| 8902 | Cell Culture Techniques | SLC35E1      | 0.000436 | 2.585884   |  |
| 8903 | Cell Culture Techniques | PNMA1        | 0.000603 | 2.646874   |  |
| 8904 | Cell Culture Techniques | ABI2         | 0.000191 | 2.657783   |  |
| 8905 | Cell Culture Techniques | PVRL2        | 0.000187 | 2.739545   |  |
| 8906 | Cell Culture Techniques | M-RIP        | 0.000292 | 2.875153   |  |
| 8907 | Cell Culture Techniques | MPV17        | 0.000334 | 2.87788    |  |
| 8908 | Cell Culture Techniques | SPARC        | 0.000665 | 2.977244   |  |
| 8909 | Cell Culture Techniques | EXT1         | 0.000425 | 3.142807   |  |
| 8910 | Cell Culture Techniques | DYRK3        | 0.000062 | 3.199536   |  |
| 8911 | Cell Culture Techniques | TCEAL3       | 0.000602 | 3.283354   |  |
| 8912 | Cell Culture Techniques | VKORC1       | 0.000031 | 3.288607   |  |
| 8913 | Cell Culture Techniques | TPM1         | 0.000436 | 3.396558   |  |
| 8914 | Cell Culture Techniques | KIAA1754     | 0.000235 | 3.642638   |  |
| 8915 | Cell Culture Techniques | HSPB2        | 0.000603 | 3.783672   |  |
| 8916 | Cell Culture Techniques | FKSG30       | 0.000436 | 3.868274   |  |
| 8917 | Cell Culture Techniques | MYADM        | 0.000189 | 3.982227   |  |
| 8918 | Cell Culture Techniques | DFNA5        | 0.000086 | 4.008277   |  |
| 8919 | Cell Culture Techniques | PELO         | 0.000599 | 4.297751   |  |
| 8920 | Cell Culture Techniques | RAB6IP1      | 0.000219 | 4.356722   |  |
| 8921 | Cell Culture Techniques | NINJ1        | 0.00058  | 4.385068   |  |
| 8922 | Cell Culture Techniques | GABARAPL1    | 0.000031 | 4.474687   |  |
| 8923 | Cell Culture Techniques | ACTN1        | 0.000001 | 4.790828   |  |
| 8924 | Cell Culture Techniques | MSN          | 0.000155 | 4.827876   |  |
| 8925 | Cell Culture Techniques | VIM          | 0.000441 | 4.942041   |  |
| 8926 | Cell Culture Techniques | ACTA2        | 0.000155 | 5.024653   |  |
| 8927 | Cell Culture Techniques | CYR61        | 0.000093 | 5.299898   |  |
| 8928 | Cell Culture Techniques | DEGS1        | 0.000035 | 5.682363   |  |
| 8929 | Cell Culture Techniques | LGALS1       | 0.000071 | 5.933415   |  |
| 8930 | Cell Culture Techniques | NGFRAP1      | 0.000501 | 6.226585   |  |
| 8931 | Cell Culture Techniques | COL1A2       | 0.000375 | 10.191927  |  |
| 8932 | Cell Culture Techniques | FAM20C       | 0.000468 | 10.313947  |  |
| 8933 | Cell Culture Techniques | DKK3         | 0.000597 | 10.416492  |  |
| 8934 | Cell Culture Techniques | VASN         | 0.000441 | 12.264142  |  |
| 8935 | Cell Separation         | CFH          | 0.001969 | -11.140652 |  |
| 8936 | Cell Separation         | RBM15        | 0.004791 | -3.808127  |  |
| 8937 | Cell Separation         | UQCC         | 0.005408 | -3.337098  |  |
| 8938 | Cell Separation         | PDCD6        | 0.000732 | -3.30841   |  |
| 8939 | Cell Separation         | HELLS        | 0.004596 | -3.245423  |  |
| 8940 | Cell Separation         | ZNF160       | 0.004021 | -3.209786  |  |
| 8941 | Cell Separation         | POLR2J2      | 0.004215 | -3.038889  |  |
| 8942 | Cell Separation         | ZNF207       | 0.004792 | -2.972298  |  |
| 8943 | Cell Separation         | WHSC1        | 0.001268 | -2.880382  |  |
| 8944 | Cell Separation         | LOC100129637 | 0.002981 | -2.861468  |  |
| 8945 | Cell Separation         | PLXND1       | 0.003286 | -2.855506  |  |
| 8946 | Cell Separation         | AFG3L1P      | 0.002109 | -2.846511  |  |
| 8947 | Cell Separation         | LOC595101    | 0.000327 | -2.818768  |  |
| 8948 | Cell Separation         | BMS1P1       | 0.000316 | -2.804696  |  |

|      |                 |              |          |           |  |
|------|-----------------|--------------|----------|-----------|--|
| 8949 | Cell Separation | PRKDC        | 0.00241  | -2.803191 |  |
| 8950 | Cell Separation | ANGPT1       | 0.00071  | -2.796247 |  |
| 8951 | Cell Separation | FAM173B      | 0.003152 | -2.753963 |  |
| 8952 | Cell Separation | CDCA7        | 0.004748 | -2.753797 |  |
| 8953 | Cell Separation | RGNEF        | 0.005098 | -2.707656 |  |
| 8954 | Cell Separation | SRSF4        | 0.002427 | -2.698683 |  |
| 8955 | Cell Separation | MMRN2        | 0.001969 | -2.660392 |  |
| 8956 | Cell Separation | KIAA1377     | 0.001162 | -2.631271 |  |
| 8957 | Cell Separation | ATP2C2       | 0.005467 | -2.576461 |  |
| 8958 | Cell Separation | CDKN2C       | 0.001025 | -2.504487 |  |
| 8959 | Cell Separation | LOC399753    | 0.006485 | -2.480526 |  |
| 8960 | Cell Separation | CRIPAK       | 0.005174 | -2.417205 |  |
| 8961 | Cell Separation | PTK2         | 0.001884 | -2.380796 |  |
| 8962 | Cell Separation | IFT80        | 0.003512 | -2.361122 |  |
| 8963 | Cell Separation | C2orf67      | 0.003336 | -2.341392 |  |
| 8964 | Cell Separation | ZADH2        | 0.006011 | -2.325923 |  |
| 8965 | Cell Separation | CREBZF       | 0.001794 | -2.300725 |  |
| 8966 | Cell Separation | MYO19        | 0.006064 | -2.275494 |  |
| 8967 | Cell Separation | CHD3         | 0.004639 | -2.229819 |  |
| 8968 | Cell Separation | NOC2L        | 0.003181 | -2.226973 |  |
| 8969 | Cell Separation | BRCA1        | 0.005839 | -2.224053 |  |
| 8970 | Cell Separation | NF1          | 0.004108 | -2.212946 |  |
| 8971 | Cell Separation | CHD9         | 0.004107 | -2.20314  |  |
| 8972 | Cell Separation | XPO1         | 0.000517 | -2.193761 |  |
| 8973 | Cell Separation | TTC23        | 0.005733 | -2.18306  |  |
| 8974 | Cell Separation | EML4         | 0.002343 | -2.177747 |  |
| 8975 | Cell Separation | SGK269       | 0.005301 | -2.172195 |  |
| 8976 | Cell Separation | PHKA2        | 0.002728 | -2.171707 |  |
| 8977 | Cell Separation | RBBP4        | 0.005467 | -2.163389 |  |
| 8978 | Cell Separation | LOC100507153 | 0.002967 | -2.133094 |  |
| 8979 | Cell Separation | ZBTB44       | 0.000125 | -2.120909 |  |
| 8980 | Cell Separation | WDR90        | 0.003152 | -2.115398 |  |
| 8981 | Cell Separation | PATZ1        | 0.002785 | -2.11183  |  |
| 8982 | Cell Separation | ZNF248       | 0.004792 | -2.098686 |  |
| 8983 | Cell Separation | SFRS4        | 0.003692 | -2.091499 |  |
| 8984 | Cell Separation | SGK494       | 0.001756 | -2.052257 |  |
| 8985 | Cell Separation | USP13        | 0.001498 | -2.050189 |  |
| 8986 | Cell Separation | ALDH7A1      | 0.004792 | -2.049889 |  |
| 8987 | Cell Separation | MPHOSPH9     | 0.004116 | -2.020827 |  |
| 8988 | Cell Separation | KIAA0467     | 0.002485 | -2.017488 |  |
| 8989 | Cell Separation | OSBPL3       | 0.000732 | 2.00378   |  |
| 8990 | Cell Separation | SERTAD1      | 0.003463 | 2.024163  |  |
| 8991 | Cell Separation | JMJD6        | 0.001662 | 2.039276  |  |
| 8992 | Cell Separation | RAP2B        | 0.000671 | 2.040388  |  |
| 8993 | Cell Separation | NDFIP2       | 0.002765 | 2.051303  |  |
| 8994 | Cell Separation | TRIM15       | 0.006381 | 2.052602  |  |
| 8995 | Cell Separation | IFNAR2       | 0.002588 | 2.053709  |  |
| 8996 | Cell Separation | HN1          | 0.006181 | 2.061183  |  |
| 8997 | Cell Separation | SLC25A25     | 0.00301  | 2.074173  |  |
| 8998 | Cell Separation | KLF10        | 0.001147 | 2.087965  |  |

|      |                 |           |          |          |  |
|------|-----------------|-----------|----------|----------|--|
| 8999 | Cell Separation | SBDS      | 0.001552 | 2.112631 |  |
| 9000 | Cell Separation | ATP6V0E1  | 0.005141 | 2.127361 |  |
| 9001 | Cell Separation | RNF7      | 0.004791 | 2.144269 |  |
| 9002 | Cell Separation | LHFPL2    | 0.006011 | 2.147585 |  |
| 9003 | Cell Separation | HIST1H2BF | 0.000517 | 2.162432 |  |
| 9004 | Cell Separation | RHPN2     | 0.003692 | 2.162838 |  |
| 9005 | Cell Separation | MAP1LC3B  | 0.004108 | 2.164625 |  |
| 9006 | Cell Separation | ALAS1     | 0.004861 | 2.183211 |  |
| 9007 | Cell Separation | HIST1H2BE | 0.003152 | 2.190406 |  |
| 9008 | Cell Separation | SELK      | 0.000728 | 2.191273 |  |
| 9009 | Cell Separation | CDV3      | 0.005041 | 2.199458 |  |
| 9010 | Cell Separation | PERP      | 0.00022  | 2.202057 |  |
| 9011 | Cell Separation | HLA-F     | 0.004108 | 2.207022 |  |
| 9012 | Cell Separation | AMOTL2    | 0.001552 | 2.213932 |  |
| 9013 | Cell Separation | PPP2CB    | 0.006104 | 2.239827 |  |
| 9014 | Cell Separation | ARL8B     | 0.005085 | 2.245124 |  |
| 9015 | Cell Separation | CFLAR     | 0.003477 | 2.250863 |  |
| 9016 | Cell Separation | DNAJB1    | 0.00241  | 2.280388 |  |
| 9017 | Cell Separation | PDE12     | 0.001268 | 2.282691 |  |
| 9018 | Cell Separation | S100A11   | 0.0036   | 2.290681 |  |
| 9019 | Cell Separation | IER5      | 0.004748 | 2.297363 |  |
| 9020 | Cell Separation | ARL5B     | 0.000244 | 2.30292  |  |
| 9021 | Cell Separation | FOXN2     | 0.001756 | 2.30656  |  |
| 9022 | Cell Separation | ERRFI1    | 0.004065 | 2.30757  |  |
| 9023 | Cell Separation | NFKBIE    | 0.005973 | 2.353556 |  |
| 9024 | Cell Separation | MTHFSD    | 0.005298 | 2.359503 |  |
| 9025 | Cell Separation | STK17A    | 0.000125 | 2.396145 |  |
| 9026 | Cell Separation | HIGD1A    | 0.001756 | 2.400591 |  |
| 9027 | Cell Separation | PLCXD2    | 0.004147 | 2.435619 |  |
| 9028 | Cell Separation | HIST1H2BI | 0.002829 | 2.438257 |  |
| 9029 | Cell Separation | GLS       | 0.001794 | 2.44452  |  |
| 9030 | Cell Separation | TPMT      | 0.004143 | 2.452997 |  |
| 9031 | Cell Separation | PIM1      | 0.001147 | 2.458919 |  |
| 9032 | Cell Separation | LGALS8    | 0.001679 | 2.471341 |  |
| 9033 | Cell Separation | CCDC51    | 0.006104 | 2.480221 |  |
| 9034 | Cell Separation | HIST1H2BK | 0.001662 | 2.514361 |  |
| 9035 | Cell Separation | SERTAD2   | 0.0044   | 2.534205 |  |
| 9036 | Cell Separation | AREG      | 0.000389 | 2.539078 |  |
| 9037 | Cell Separation | OCLN      | 0.001052 | 2.551247 |  |
| 9038 | Cell Separation | CPEB2     | 0.005988 | 2.565899 |  |
| 9039 | Cell Separation | MDF1      | 0.004314 | 2.570407 |  |
| 9040 | Cell Separation | HCCS      | 0.004748 | 2.584927 |  |
| 9041 | Cell Separation | C6orf132  | 0.001087 | 2.612396 |  |
| 9042 | Cell Separation | RAB22A    | 0.001756 | 2.613734 |  |
| 9043 | Cell Separation | ANXA3     | 0.00508  | 2.635969 |  |
| 9044 | Cell Separation | MXD1      | 0.000125 | 2.649865 |  |
| 9045 | Cell Separation | RALA      | 0.002459 | 2.658884 |  |
| 9046 | Cell Separation | TPM4      | 0.003336 | 2.660044 |  |
| 9047 | Cell Separation | TNFSF9    | 0.000316 | 2.669576 |  |
| 9048 | Cell Separation | RND3      | 0.000125 | 2.709598 |  |



|      |                 |              |          |          |  |
|------|-----------------|--------------|----------|----------|--|
| 9049 | Cell Separation | TIPARP       | 0.004639 | 2.712231 |  |
| 9050 | Cell Separation | DUSP10       | 0.000754 | 2.723635 |  |
| 9051 | Cell Separation | SFN          | 0.004323 | 2.72591  |  |
| 9052 | Cell Separation | EPB41L5      | 0.00032  | 2.728434 |  |
| 9053 | Cell Separation | KLF4         | 0.001474 | 2.76071  |  |
| 9054 | Cell Separation | OBFC2A       | 0.003595 | 2.787294 |  |
| 9055 | Cell Separation | TAP1         | 0.003545 | 2.824943 |  |
| 9056 | Cell Separation | FGD6         | 0.004373 | 2.855279 |  |
| 9057 | Cell Separation | NAMPT        | 0.005085 | 2.873318 |  |
| 9058 | Cell Separation | ZNF165       | 0.002504 | 2.875868 |  |
| 9059 | Cell Separation | CLDN4        | 0.00071  | 2.911135 |  |
| 9060 | Cell Separation | SEMA7A       | 0.001969 | 2.932253 |  |
| 9061 | Cell Separation | GJB3         | 0.004107 | 2.938013 |  |
| 9062 | Cell Separation | NFKBIB       | 0.003234 | 2.941764 |  |
| 9063 | Cell Separation | TAGAP        | 0.001969 | 2.980919 |  |
| 9064 | Cell Separation | CD47         | 0.005041 | 2.995743 |  |
| 9065 | Cell Separation | EZR          | 0.00178  | 3.023584 |  |
| 9066 | Cell Separation | CLIC5        | 0.004147 | 3.081047 |  |
| 9067 | Cell Separation | DPH3         | 0.001748 | 3.091732 |  |
| 9068 | Cell Separation | LAMB3        | 0.005141 | 3.103992 |  |
| 9069 | Cell Separation | LMO7         | 0.005034 | 3.110319 |  |
| 9070 | Cell Separation | LOC100506979 | 0.004639 | 3.130702 |  |
| 9071 | Cell Separation | HIST1H2BH    | 0.000517 | 3.147934 |  |
| 9072 | Cell Separation | TICAM1       | 0.000191 | 3.159202 |  |
| 9073 | Cell Separation | GAN          | 0.002595 | 3.170409 |  |
| 9074 | Cell Separation | IL23A        | 0.001147 | 3.182919 |  |
| 9075 | Cell Separation | LOC440896    | 0.001764 | 3.190618 |  |
| 9076 | Cell Separation | CLDN23       | 0.005467 | 3.243061 |  |
| 9077 | Cell Separation | H2BFS        | 0.00071  | 3.246703 |  |
| 9078 | Cell Separation | CHMP2B       | 0.000732 | 3.259293 |  |
| 9079 | Cell Separation | MAFF         | 0.00071  | 3.270931 |  |
| 9080 | Cell Separation | HIST1H2BD    | 0.001211 | 3.297822 |  |
| 9081 | Cell Separation | GADD45A      | 0.005141 | 3.349209 |  |
| 9082 | Cell Separation | IFRD1        | 0.000229 | 3.364611 |  |
| 9083 | Cell Separation | DDA1         | 0.006252 | 3.442754 |  |
| 9084 | Cell Separation | USP53        | 0.003981 | 3.463071 |  |
| 9085 | Cell Separation | RHOF         | 0.00178  | 3.465639 |  |
| 9086 | Cell Separation | RAB9A        | 0.003181 | 3.471487 |  |
| 9087 | Cell Separation | PPP1R15A     | 0.006064 | 3.541813 |  |
| 9088 | Cell Separation | LOC439990    | 0.004107 | 3.5739   |  |
| 9089 | Cell Separation | ID2          | 0.003434 | 3.739528 |  |
| 9090 | Cell Separation | HIST1H2BG    | 0.004577 | 3.788688 |  |
| 9091 | Cell Separation | PPP4R1L      | 0.003181 | 3.813426 |  |
| 9092 | Cell Separation | GPRC5A       | 0.001717 | 3.866214 |  |
| 9093 | Cell Separation | EDN1         | 0.001662 | 3.996734 |  |
| 9094 | Cell Separation | KLF6         | 0.000125 | 4.047716 |  |
| 9095 | Cell Separation | ZFAND2A      | 0.001662 | 4.179808 |  |
| 9096 | Cell Separation | TNFAIP3      | 0.001662 | 4.181002 |  |
| 9097 | Cell Separation | FOSL1        | 0.002785 | 4.261609 |  |
| 9098 | Cell Separation | HIST2H2AA3   | 0.002775 | 4.307458 |  |

|      |                     |           |          |           |  |
|------|---------------------|-----------|----------|-----------|--|
| 9099 | Cell Separation     | CXCL16    | 0.001552 | 4.316383  |  |
| 9100 | Cell Separation     | NCEH1     | 0.004107 | 4.415097  |  |
| 9101 | Cell Separation     | PMAIP1    | 0.002949 | 4.535741  |  |
| 9102 | Cell Separation     | TUBB2A    | 0.001648 | 4.71727   |  |
| 9103 | Cell Separation     | TM4SF1    | 0.004059 | 4.932563  |  |
| 9104 | Cell Separation     | NFKBIA    | 0.004108 | 5.051207  |  |
| 9105 | Cell Separation     | KIAA1609  | 0.003254 | 5.184877  |  |
| 9106 | Cell Separation     | DUSP5     | 0.001662 | 5.413098  |  |
| 9107 | Cell Separation     | EMP1      | 0.001764 | 5.681152  |  |
| 9108 | Cell Separation     | PLAUR     | 0.000229 | 5.92149   |  |
| 9109 | Cell Separation     | IL32      | 0.002728 | 6.867646  |  |
| 9110 | Cell Separation     | C10orf116 | 0.003181 | 7.514991  |  |
| 9111 | Cell Separation     | BIRC3     | 0.00642  | 7.908702  |  |
| 9112 | Cell Separation     | LAMC2     | 0.003986 | 9.26201   |  |
| 9113 | Cell Separation     | CDA       | 0.005862 | 9.815259  |  |
| 9114 | Chemical extraction | COL1A1    | 0        | -5.27529  |  |
| 9115 | Chemical extraction | MMP7      | 0        | -4.132738 |  |
| 9116 | Chemical extraction | SPP1      | 0        | -4.130239 |  |
| 9117 | Chemical extraction | IL8       | 0        | -3.187774 |  |
| 9118 | Chemical extraction | KRT23     | 0        | -3.15084  |  |
| 9119 | Chemical extraction | COL1A2    | 0        | -3.116379 |  |
| 9120 | Chemical extraction | TGFB1     | 0        | -2.936139 |  |
| 9121 | Chemical extraction | INHBA     | 0        | -2.666466 |  |
| 9122 | Chemical extraction | HKDC1     | 0        | -2.660582 |  |
| 9123 | Chemical extraction | NFE2L3    | 0        | -2.463859 |  |
| 9124 | Chemical extraction | CCL20     | 0        | -2.310437 |  |
| 9125 | Chemical extraction | SFRP4     | 0        | -2.294594 |  |
| 9126 | Chemical extraction | MMP12     | 0        | -2.283803 |  |
| 9127 | Chemical extraction | COL10A1   | 0        | -2.176511 |  |
| 9128 | Chemical extraction | MYC       | 0        | -2.131113 |  |
| 9129 | Chemical extraction | JUB       | 0        | -2.121437 |  |
| 9130 | Chemical extraction | GZMB      | 0        | -2.088884 |  |
| 9131 | Chemical extraction | CDC123    | 0        | 2.016474  |  |
| 9132 | Chemical extraction | C6orf118  | 0        | 2.143404  |  |
| 9133 | Chemical extraction | CD1A      | 0        | 2.195462  |  |
| 9134 | Chemical extraction | NUDCD1    | 0        | 2.265265  |  |
| 9135 | Chemical extraction | ENPEP     | 0        | 2.363024  |  |
| 9136 | Colon adenoma       | SYNE1     | 0.000014 | -6.563564 |  |
| 9137 | Colon adenoma       | MEIS1     | 0        | -5.618535 |  |
| 9138 | Colon adenoma       | TRPC1     | 0        | -5.588125 |  |
| 9139 | Colon adenoma       | FBLN1     | 0        | -5.117333 |  |
| 9140 | Colon adenoma       | CDH19     | 0        | -5.022701 |  |
| 9141 | Colon adenoma       | GZMK      | 0.000021 | -4.771295 |  |
| 9142 | Colon adenoma       | ADAMDEC1  | 0        | -4.340817 |  |
| 9143 | Colon adenoma       | TRAF3IP3  | 0.000018 | -4.30323  |  |
| 9144 | Colon adenoma       | LOC399959 | 0.000022 | -4.287609 |  |
| 9145 | Colon adenoma       | CXCL12    | 0.000005 | -4.244649 |  |
| 9146 | Colon adenoma       | CCL2      | 0.000015 | -4.121636 |  |
| 9147 | Colon adenoma       | LAMA2     | 0        | -4.08393  |  |
| 9148 | Colon adenoma       | NLGN4X    | 0        | -4.057908 |  |

|      |               |           |          |           |  |
|------|---------------|-----------|----------|-----------|--|
| 9149 | Colon adenoma | PCDH19    | 0.00002  | -3.957706 |  |
| 9150 | Colon adenoma | DPYD      | 0        | -3.957465 |  |
| 9151 | Colon adenoma | RBP5      | 0.00001  | -3.891229 |  |
| 9152 | Colon adenoma | CPNE8     | 0        | -3.806743 |  |
| 9153 | Colon adenoma | PPP1R16B  | 0.000004 | -3.797815 |  |
| 9154 | Colon adenoma | SCGN      | 0.000009 | -3.779157 |  |
| 9155 | Colon adenoma | ADAMTS1   | 0.000015 | -3.716882 |  |
| 9156 | Colon adenoma | GPC6      | 0        | -3.69371  |  |
| 9157 | Colon adenoma | DOCK10    | 0        | -3.6903   |  |
| 9158 | Colon adenoma | RASGRP3   | 0        | -3.606281 |  |
| 9159 | Colon adenoma | TNXA      | 0.000016 | -3.570317 |  |
| 9160 | Colon adenoma | LPHN2     | 0        | -3.519243 |  |
| 9161 | Colon adenoma | CP        | 0.000005 | -3.490476 |  |
| 9162 | Colon adenoma | ZEB2      | 0        | -3.428728 |  |
| 9163 | Colon adenoma | VCAM1     | 0.000004 | -3.409172 |  |
| 9164 | Colon adenoma | FRMD6     | 0        | -3.373895 |  |
| 9165 | Colon adenoma | PCDH7     | 0.000022 | -3.361762 |  |
| 9166 | Colon adenoma | CDH2      | 0.000003 | -3.347133 |  |
| 9167 | Colon adenoma | FAM107A   | 0.000004 | -3.324142 |  |
| 9168 | Colon adenoma | PDE2A     | 0        | -3.322784 |  |
| 9169 | Colon adenoma | SEMA6D    | 0.000009 | -3.321159 |  |
| 9170 | Colon adenoma | CHL1      | 0.000017 | -3.308172 |  |
| 9171 | Colon adenoma | FAM110B   | 0.000001 | -3.283492 |  |
| 9172 | Colon adenoma | C20orf194 | 0        | -3.28122  |  |
| 9173 | Colon adenoma | SFMBT2    | 0.000001 | -3.24373  |  |
| 9174 | Colon adenoma | EMCN      | 0.000009 | -3.242664 |  |
| 9175 | Colon adenoma | CCDC80    | 0        | -3.229232 |  |
| 9176 | Colon adenoma | WIPF1     | 0.000006 | -3.18889  |  |
| 9177 | Colon adenoma | MIR214    | 0.000015 | -3.185454 |  |
| 9178 | Colon adenoma | PTPRC     | 0.000015 | -3.171861 |  |
| 9179 | Colon adenoma | EBF1      | 0.000026 | -3.164785 |  |
| 9180 | Colon adenoma | SPARCL1   | 0        | -3.124702 |  |
| 9181 | Colon adenoma | C1S       | 0        | -3.112694 |  |
| 9182 | Colon adenoma | ZCCHC24   | 0        | -3.100495 |  |
| 9183 | Colon adenoma | SCARA5    | 0.000006 | -3.070863 |  |
| 9184 | Colon adenoma | DCN       | 0.000005 | -3.053733 |  |
| 9185 | Colon adenoma | SLIT2     | 0.000006 | -3.014042 |  |
| 9186 | Colon adenoma | PMP22     | 0.000002 | -3.011268 |  |
| 9187 | Colon adenoma | GIMAP6    | 0        | -3.01085  |  |
| 9188 | Colon adenoma | MAF       | 0        | -3.003109 |  |
| 9189 | Colon adenoma | CFH       | 0        | -2.998647 |  |
| 9190 | Colon adenoma | GNB4      | 0.000011 | -2.991988 |  |
| 9191 | Colon adenoma | RERG      | 0        | -2.9816   |  |
| 9192 | Colon adenoma | MCC       | 0        | -2.970271 |  |
| 9193 | Colon adenoma | ADAM28    | 0.00001  | -2.969096 |  |
| 9194 | Colon adenoma | ITPR1     | 0.000003 | -2.958448 |  |
| 9195 | Colon adenoma | NR3C1     | 0        | -2.950447 |  |
| 9196 | Colon adenoma | CLIP4     | 0.000009 | -2.937125 |  |
| 9197 | Colon adenoma | CACNA2D1  | 0.000001 | -2.935371 |  |
| 9198 | Colon adenoma | FGL2      | 0        | -2.932828 |  |

|      |               |              |          |           |  |
|------|---------------|--------------|----------|-----------|--|
| 9199 | Colon adenoma | FAM126A      | 0.000002 | -2.92626  |  |
| 9200 | Colon adenoma | ITIH5        | 0        | -2.924913 |  |
| 9201 | Colon adenoma | ADAP2        | 0.000006 | -2.907607 |  |
| 9202 | Colon adenoma | GIMAP7       | 0        | -2.904896 |  |
| 9203 | Colon adenoma | XKR4         | 0.000027 | -2.89146  |  |
| 9204 | Colon adenoma | COL14A1      | 0.000027 | -2.880001 |  |
| 9205 | Colon adenoma | LIFR         | 0.000027 | -2.862675 |  |
| 9206 | Colon adenoma | LOC100132891 | 0.000007 | -2.857789 |  |
| 9207 | Colon adenoma | ATP8B2       | 0.000011 | -2.842167 |  |
| 9208 | Colon adenoma | RDX          | 0        | -2.833988 |  |
| 9209 | Colon adenoma | RFTN1        | 0.000018 | -2.831749 |  |
| 9210 | Colon adenoma | SNAI2        | 0.000004 | -2.825814 |  |
| 9211 | Colon adenoma | SNAP25       | 0.000026 | -2.820829 |  |
| 9212 | Colon adenoma | ITM2A        | 0.000004 | -2.813288 |  |
| 9213 | Colon adenoma | LOC100506621 | 0.000027 | -2.813074 |  |
| 9214 | Colon adenoma | GNG2         | 0        | -2.792069 |  |
| 9215 | Colon adenoma | TBC1D9       | 0        | -2.789546 |  |
| 9216 | Colon adenoma | CCDC8        | 0.000013 | -2.786944 |  |
| 9217 | Colon adenoma | CMAH         | 0.000015 | -2.777597 |  |
| 9218 | Colon adenoma | SSBP2        | 0.000003 | -2.772938 |  |
| 9219 | Colon adenoma | TCF21        | 0.000002 | -2.771469 |  |
| 9220 | Colon adenoma | CD48         | 0.00002  | -2.756235 |  |
| 9221 | Colon adenoma | CLIC2        | 0.000004 | -2.754874 |  |
| 9222 | Colon adenoma | KLRK1        | 0.000001 | -2.753093 |  |
| 9223 | Colon adenoma | JAM2         | 0        | -2.74367  |  |
| 9224 | Colon adenoma | HIC1         | 0        | -2.712245 |  |
| 9225 | Colon adenoma | ST8SIA4      | 0.000004 | -2.708861 |  |
| 9226 | Colon adenoma | COLEC12      | 0.000001 | -2.704382 |  |
| 9227 | Colon adenoma | ACP5         | 0.000011 | -2.698381 |  |
| 9228 | Colon adenoma | HLA-DPA1     | 0.000001 | -2.685678 |  |
| 9229 | Colon adenoma | DOCK2        | 0.000011 | -2.677831 |  |
| 9230 | Colon adenoma | QKI          | 0.000001 | -2.669064 |  |
| 9231 | Colon adenoma | DZIP1        | 0.000004 | -2.664127 |  |
| 9232 | Colon adenoma | MAB21L2      | 0        | -2.662187 |  |
| 9233 | Colon adenoma | ASPN         | 0.00001  | -2.658627 |  |
| 9234 | Colon adenoma | LOC728392    | 0.000002 | -2.655484 |  |
| 9235 | Colon adenoma | SPG20        | 0.000013 | -2.650279 |  |
| 9236 | Colon adenoma | NPAS3        | 0.000004 | -2.641488 |  |
| 9237 | Colon adenoma | MEF2C        | 0.000009 | -2.629412 |  |
| 9238 | Colon adenoma | IGFBP3       | 0.000009 | -2.597797 |  |
| 9239 | Colon adenoma | MPEG1        | 0.000005 | -2.595565 |  |
| 9240 | Colon adenoma | LSP1         | 0.000003 | -2.589832 |  |
| 9241 | Colon adenoma | GIMAP4       | 0        | -2.582242 |  |
| 9242 | Colon adenoma | NLRC3        | 0.000001 | -2.580819 |  |
| 9243 | Colon adenoma | CYGB         | 0        | -2.574414 |  |
| 9244 | Colon adenoma | AQP1         | 0.000021 | -2.561552 |  |
| 9245 | Colon adenoma | ITGA4        | 0        | -2.560951 |  |
| 9246 | Colon adenoma | EFEMP1       | 0.000005 | -2.560292 |  |
| 9247 | Colon adenoma | ITGAL        | 0.000014 | -2.552855 |  |
| 9248 | Colon adenoma | PRICKLE1     | 0.000006 | -2.552477 |  |

|      |               |              |          |           |  |
|------|---------------|--------------|----------|-----------|--|
| 9249 | Colon adenoma | FYB          | 0.000003 | -2.54851  |  |
| 9250 | Colon adenoma | CCR2         | 0.000009 | -2.545477 |  |
| 9251 | Colon adenoma | WWTR1        | 0        | -2.544909 |  |
| 9252 | Colon adenoma | IGF1         | 0.000006 | -2.543039 |  |
| 9253 | Colon adenoma | LPAR1        | 0        | -2.541552 |  |
| 9254 | Colon adenoma | LOC100128252 | 0.000019 | -2.538955 |  |
| 9255 | Colon adenoma | FAM55C       | 0.000009 | -2.534637 |  |
| 9256 | Colon adenoma | C14orf139    | 0.000001 | -2.533271 |  |
| 9257 | Colon adenoma | GIMAP1       | 0.00001  | -2.527932 |  |
| 9258 | Colon adenoma | RAB34        | 0.000001 | -2.511206 |  |
| 9259 | Colon adenoma | DOCK8        | 0.000023 | -2.505324 |  |
| 9260 | Colon adenoma | SDPR         | 0        | -2.501807 |  |
| 9261 | Colon adenoma | TRBC1        | 0.000025 | -2.501359 |  |
| 9262 | Colon adenoma | MYLK         | 0.000001 | -2.491934 |  |
| 9263 | Colon adenoma | SERPINF1     | 0.000012 | -2.489622 |  |
| 9264 | Colon adenoma | EMILIN1      | 0.000018 | -2.488391 |  |
| 9265 | Colon adenoma | RHOJ         | 0.000001 | -2.478906 |  |
| 9266 | Colon adenoma | SETBP1       | 0.000004 | -2.475948 |  |
| 9267 | Colon adenoma | PRKAR2B      | 0        | -2.475068 |  |
| 9268 | Colon adenoma | MSN          | 0.000019 | -2.474954 |  |
| 9269 | Colon adenoma | GIMAP8       | 0.000018 | -2.474757 |  |
| 9270 | Colon adenoma | TCF4         | 0.000003 | -2.46412  |  |
| 9271 | Colon adenoma | WAS          | 0.000016 | -2.463565 |  |
| 9272 | Colon adenoma | EFS          | 0.000001 | -2.461236 |  |
| 9273 | Colon adenoma | LOX          | 0.000005 | -2.460449 |  |
| 9274 | Colon adenoma | EDIL3        | 0.000027 | -2.455198 |  |
| 9275 | Colon adenoma | RUNX1T1      | 0        | -2.446776 |  |
| 9276 | Colon adenoma | TMEM47       | 0.000001 | -2.445538 |  |
| 9277 | Colon adenoma | COL28A1      | 0.000013 | -2.435502 |  |
| 9278 | Colon adenoma | GAS7         | 0.000016 | -2.4351   |  |
| 9279 | Colon adenoma | ZNF542       | 0.000014 | -2.432356 |  |
| 9280 | Colon adenoma | HLA-DPB1     | 0.000004 | -2.42914  |  |
| 9281 | Colon adenoma | CLEC2B       | 0.000012 | -2.426989 |  |
| 9282 | Colon adenoma | IL18BP       | 0.00002  | -2.423986 |  |
| 9283 | Colon adenoma | GLI1         | 0.000009 | -2.42391  |  |
| 9284 | Colon adenoma | CSF1R        | 0.000004 | -2.42014  |  |
| 9285 | Colon adenoma | ARHGEF17     | 0.000001 | -2.412614 |  |
| 9286 | Colon adenoma | MXD1         | 0.000011 | -2.401134 |  |
| 9287 | Colon adenoma | CYSLTR1      | 0        | -2.399178 |  |
| 9288 | Colon adenoma | FXVD6        | 0.000002 | -2.395755 |  |
| 9289 | Colon adenoma | MPDZ         | 0.000005 | -2.394859 |  |
| 9290 | Colon adenoma | TIMP3        | 0.000001 | -2.394643 |  |
| 9291 | Colon adenoma | CHRD1        | 0.000014 | -2.391992 |  |
| 9292 | Colon adenoma | THSD7A       | 0.000006 | -2.39099  |  |
| 9293 | Colon adenoma | ZFPM2        | 0        | -2.389381 |  |
| 9294 | Colon adenoma | RGMA         | 0.000018 | -2.388756 |  |
| 9295 | Colon adenoma | LDB2         | 0.000015 | -2.378466 |  |
| 9296 | Colon adenoma | GZMA         | 0.000012 | -2.377783 |  |
| 9297 | Colon adenoma | CPM          | 0.000022 | -2.370853 |  |
| 9298 | Colon adenoma | EVI2B        | 0.000026 | -2.370211 |  |

|      |               |           |          |           |  |
|------|---------------|-----------|----------|-----------|--|
| 9299 | Colon adenoma | CD36      | 0        | -2.36807  |  |
| 9300 | Colon adenoma | FAM13C    | 0.000001 | -2.367818 |  |
| 9301 | Colon adenoma | ZNF304    | 0.000001 | -2.36777  |  |
| 9302 | Colon adenoma | EVL       | 0.000017 | -2.365015 |  |
| 9303 | Colon adenoma | OLFML1    | 0        | -2.352103 |  |
| 9304 | Colon adenoma | RECK      | 0        | -2.348067 |  |
| 9305 | Colon adenoma | CALHM2    | 0.000001 | -2.344725 |  |
| 9306 | Colon adenoma | SPARC     | 0.000001 | -2.342933 |  |
| 9307 | Colon adenoma | FAM78A    | 0.000021 | -2.339397 |  |
| 9308 | Colon adenoma | EPB41L3   | 0.000002 | -2.336952 |  |
| 9309 | Colon adenoma | CD3D      | 0.000015 | -2.333476 |  |
| 9310 | Colon adenoma | LUM       | 0.000004 | -2.332403 |  |
| 9311 | Colon adenoma | NRP1      | 0.000002 | -2.319185 |  |
| 9312 | Colon adenoma | NDN       | 0        | -2.313748 |  |
| 9313 | Colon adenoma | FNBP1     | 0.000007 | -2.312437 |  |
| 9314 | Colon adenoma | IL6R      | 0        | -2.308615 |  |
| 9315 | Colon adenoma | ITK       | 0.00002  | -2.305504 |  |
| 9316 | Colon adenoma | SCG2      | 0.000016 | -2.300982 |  |
| 9317 | Colon adenoma | ANTXR1    | 0.000015 | -2.293843 |  |
| 9318 | Colon adenoma | MYO5A     | 0.000001 | -2.291889 |  |
| 9319 | Colon adenoma | AXL       | 0.000021 | -2.290225 |  |
| 9320 | Colon adenoma | RCAN1     | 0.000002 | -2.289081 |  |
| 9321 | Colon adenoma | ECSCR     | 0.000017 | -2.284871 |  |
| 9322 | Colon adenoma | STOX2     | 0.000013 | -2.27665  |  |
| 9323 | Colon adenoma | C6orf204  | 0.000014 | -2.262931 |  |
| 9324 | Colon adenoma | MSRB3     | 0.000006 | -2.25566  |  |
| 9325 | Colon adenoma | RBMS1     | 0        | -2.242471 |  |
| 9326 | Colon adenoma | DKK3      | 0        | -2.238933 |  |
| 9327 | Colon adenoma | ARHGAP25  | 0.000013 | -2.238708 |  |
| 9328 | Colon adenoma | TNFRSF25  | 0.000015 | -2.23356  |  |
| 9329 | Colon adenoma | CD86      | 0.000017 | -2.21729  |  |
| 9330 | Colon adenoma | JAZF1     | 0.000001 | -2.210426 |  |
| 9331 | Colon adenoma | MS4A6A    | 0.000006 | -2.202884 |  |
| 9332 | Colon adenoma | FERMT2    | 0        | -2.20204  |  |
| 9333 | Colon adenoma | C14orf132 | 0.000001 | -2.192972 |  |
| 9334 | Colon adenoma | STAB1     | 0.000004 | -2.188313 |  |
| 9335 | Colon adenoma | TARP      | 0.000004 | -2.185572 |  |
| 9336 | Colon adenoma | AKAP12    | 0        | -2.18236  |  |
| 9337 | Colon adenoma | ETS1      | 0.000009 | -2.177302 |  |
| 9338 | Colon adenoma | ARMCX1    | 0.000001 | -2.17268  |  |
| 9339 | Colon adenoma | HLA-DOA   | 0.000026 | -2.159713 |  |
| 9340 | Colon adenoma | CD3E      | 0.000009 | -2.159225 |  |
| 9341 | Colon adenoma | PDGFRA    | 0.000012 | -2.158381 |  |
| 9342 | Colon adenoma | OLFML3    | 0.000002 | -2.154377 |  |
| 9343 | Colon adenoma | HEG1      | 0.000007 | -2.150429 |  |
| 9344 | Colon adenoma | CRYAB     | 0        | -2.149325 |  |
| 9345 | Colon adenoma | CYLD      | 0.000003 | -2.139364 |  |
| 9346 | Colon adenoma | C10orf72  | 0.000002 | -2.12672  |  |
| 9347 | Colon adenoma | CTSC      | 0.000005 | -2.116743 |  |
| 9348 | Colon adenoma | LHFP      | 0        | -2.111542 |  |

|      |                 |          |          |           |  |
|------|-----------------|----------|----------|-----------|--|
| 9349 | Colon adenoma   | FLI1     | 0.000014 | -2.109904 |  |
| 9350 | Colon adenoma   | PREX2    | 0.000014 | -2.108912 |  |
| 9351 | Colon adenoma   | PDLIM3   | 0.000001 | -2.107972 |  |
| 9352 | Colon adenoma   | PTPRM    | 0.000026 | -2.103882 |  |
| 9353 | Colon adenoma   | CALD1    | 0        | -2.099286 |  |
| 9354 | Colon adenoma   | DDR2     | 0        | -2.098418 |  |
| 9355 | Colon adenoma   | HLA-DRB1 | 0.000007 | -2.095995 |  |
| 9356 | Colon adenoma   | CMTM3    | 0.000019 | -2.095868 |  |
| 9357 | Colon adenoma   | ANGPT1   | 0.000001 | -2.084996 |  |
| 9358 | Colon adenoma   | ST7L     | 0.000001 | -2.079927 |  |
| 9359 | Colon adenoma   | ARHGEF6  | 0.000013 | -2.079279 |  |
| 9360 | Colon adenoma   | PTPN22   | 0        | -2.078373 |  |
| 9361 | Colon adenoma   | AP1S2    | 0        | -2.078222 |  |
| 9362 | Colon adenoma   | LAYN     | 0.000006 | -2.076001 |  |
| 9363 | Colon adenoma   | PRDM1    | 0.000004 | -2.074792 |  |
| 9364 | Colon adenoma   | TNS1     | 0.000001 | -2.071872 |  |
| 9365 | Colon adenoma   | AKAP2    | 0        | -2.069514 |  |
| 9366 | Colon adenoma   | S1PR1    | 0.000005 | -2.059119 |  |
| 9367 | Colon adenoma   | GIMAP5   | 0.000009 | -2.058582 |  |
| 9368 | Colon adenoma   | AMOTL1   | 0.000017 | -2.055109 |  |
| 9369 | Colon adenoma   | JAM3     | 0.000002 | -2.051995 |  |
| 9370 | Colon adenoma   | PLOD2    | 0.000001 | -2.048507 |  |
| 9371 | Colon adenoma   | ZEB1     | 0.000002 | -2.044585 |  |
| 9372 | Colon adenoma   | CTSZ     | 0.000023 | -2.03718  |  |
| 9373 | Colon adenoma   | LAMA4    | 0.000027 | -2.027234 |  |
| 9374 | Colon adenoma   | ECM2     | 0        | -2.01929  |  |
| 9375 | Colon adenoma   | TSC22D3  | 0.000004 | -2.018925 |  |
| 9376 | Colon adenoma   | RAB37    | 0.000019 | -2.009905 |  |
| 9377 | Colon adenoma   | RBMS3    | 0.000001 | -2.002071 |  |
| 9378 | Colon adenoma   | CCDC113  | 0.000018 | 2.049514  |  |
| 9379 | Colon adenoma   | ITGA6    | 0.000001 | 2.117016  |  |
| 9380 | Colon adenoma   | ZNRF3    | 0.00001  | 2.73187   |  |
| 9381 | Colon Carcinoma | MAPK10   | 0.010117 | -4.758095 |  |
| 9382 | Colon Carcinoma | DLGAP4   | 0.009754 | -2.082438 |  |
| 9383 | Colon Carcinoma | NOC2L    | 0.026594 | 2.104099  |  |
| 9384 | Colon Carcinoma | MORC4    | 0.004279 | 2.112565  |  |
| 9385 | Colon Carcinoma | LOC90835 | 0.001125 | 2.166442  |  |
| 9386 | Colon Carcinoma | SFRS3    | 0.023214 | 2.178891  |  |
| 9387 | Colon Carcinoma | EXOSC8   | 0.023557 | 2.246594  |  |
| 9388 | Colon Carcinoma | COMT     | 0.0087   | 2.27312   |  |
| 9389 | Colon Carcinoma | DARS2    | 0.003721 | 2.328628  |  |
| 9390 | Colon Carcinoma | ENC1     | 0.005205 | 2.353768  |  |
| 9391 | Colon Carcinoma | CSPP1    | 0.004279 | 2.417897  |  |
| 9392 | Colon Carcinoma | RPL35A   | 0.023557 | 2.488761  |  |
| 9393 | Colon Carcinoma | SLC7A6   | 0.005899 | 2.538138  |  |
| 9394 | Colon Carcinoma | UBE2V1   | 0.004279 | 2.625998  |  |
| 9395 | Colon Carcinoma | MCM8     | 0.004563 | 2.888232  |  |
| 9396 | Colon Carcinoma | C13orf3  | 0.010117 | 3.221261  |  |
| 9397 | Colon Carcinoma | BUB1     | 0.003759 | 3.279526  |  |
| 9398 | Colon Carcinoma | FANCI    | 0.0087   | 3.309157  |  |

|      |                   |           |          |             |  |
|------|-------------------|-----------|----------|-------------|--|
| 9399 | Colon Carcinoma   | CDC6      | 0.011855 | 3.551337    |  |
| 9400 | Colon Carcinoma   | WDSOF1    | 0.001352 | 3.709982    |  |
| 9401 | Colon Carcinoma   | RELL2     | 0.003759 | 3.855649    |  |
| 9402 | Colon Carcinoma   | CCDC86    | 0.002201 | 3.867938    |  |
| 9403 | Colon Carcinoma   | E2F5      | 0.005272 | 3.890783    |  |
| 9404 | Colon Carcinoma   | XPOT      | 0.014459 | 3.992622    |  |
| 9405 | Colon Carcinoma   | KIF20A    | 0.000391 | 5.468525    |  |
| 9406 | Colon Carcinoma   | HMMR      | 0.000025 | 5.804377    |  |
| 9407 | Colonic Neoplasms | RFTN1     | 0        | -143.024155 |  |
| 9408 | Colonic Neoplasms | CHI3L1    | 0        | -36.962963  |  |
| 9409 | Colonic Neoplasms | HLA-DRA   | 0        | -35.365312  |  |
| 9410 | Colonic Neoplasms | CD53      | 0        | -32.87      |  |
| 9411 | Colonic Neoplasms | PLSCR4    | 0        | -26.631579  |  |
| 9412 | Colonic Neoplasms | ETS1      | 0        | -23.917786  |  |
| 9413 | Colonic Neoplasms | APBB1IP   | 0        | -23.133745  |  |
| 9414 | Colonic Neoplasms | NNMT      | 0        | -20.655502  |  |
| 9415 | Colonic Neoplasms | SYNPO2    | 0        | -20.006999  |  |
| 9416 | Colonic Neoplasms | HLA-C     | 0        | -19.127079  |  |
| 9417 | Colonic Neoplasms | CXCR4     | 0        | -18.861111  |  |
| 9418 | Colonic Neoplasms | FRMD6     | 0        | -17.813401  |  |
| 9419 | Colonic Neoplasms | CD93      | 0        | -17.171569  |  |
| 9420 | Colonic Neoplasms | COL6A3    | 0        | -16.084115  |  |
| 9421 | Colonic Neoplasms | COL5A1    | 0        | -15.698732  |  |
| 9422 | Colonic Neoplasms | ADH1B     | 0.000163 | -14.659768  |  |
| 9423 | Colonic Neoplasms | RAB31     | 0        | -14.615832  |  |
| 9424 | Colonic Neoplasms | DDR2      | 0        | -14.540682  |  |
| 9425 | Colonic Neoplasms | HLA-DQA1  | 0        | -14.451419  |  |
| 9426 | Colonic Neoplasms | MPEG1     | 0        | -13.380615  |  |
| 9427 | Colonic Neoplasms | LOC387763 | 0        | -12.319389  |  |
| 9428 | Colonic Neoplasms | CYR61     | 0        | -11.912235  |  |
| 9429 | Colonic Neoplasms | TYROBP    | 0        | -11.03887   |  |
| 9430 | Colonic Neoplasms | NTN2L     | 0        | -10.973491  |  |
| 9431 | Colonic Neoplasms | PLN       | 0.000977 | -10.884812  |  |
| 9432 | Colonic Neoplasms | SLC26A3   | 0.000007 | -10.831482  |  |
| 9433 | Colonic Neoplasms | CA7       | 0.000012 | -10.114109  |  |
| 9434 | Colonic Neoplasms | PMP22     | 0        | -9.964404   |  |
| 9435 | Colonic Neoplasms | LAPTM5    | 0        | -9.543955   |  |
| 9436 | Colonic Neoplasms | CA1       | 0        | -9.053477   |  |
| 9437 | Colonic Neoplasms | RGS2      | 0        | -8.964338   |  |
| 9438 | Colonic Neoplasms | DUSP1     | 0        | -8.9331     |  |
| 9439 | Colonic Neoplasms | CLU       | 0.000387 | -8.79937    |  |
| 9440 | Colonic Neoplasms | SGCD      | 0        | -8.547325   |  |
| 9441 | Colonic Neoplasms | AQP3      | 0        | -8.176899   |  |
| 9442 | Colonic Neoplasms | GREM2     | 0        | -7.997592   |  |
| 9443 | Colonic Neoplasms | HEG1      | 0        | -7.925011   |  |
| 9444 | Colonic Neoplasms | MS4A6A    | 0        | -7.855981   |  |
| 9445 | Colonic Neoplasms | INSL5     | 0.000002 | -7.817222   |  |
| 9446 | Colonic Neoplasms | MYH11     | 0.000259 | -7.704745   |  |
| 9447 | Colonic Neoplasms | CHGA      | 0.000013 | -7.627212   |  |
| 9448 | Colonic Neoplasms | JCLN      | 0        | -7.580735   |  |



|      |                   |           |          |           |  |
|------|-------------------|-----------|----------|-----------|--|
| 9449 | Colonic Neoplasms | CTGF      | 0        | -7.551444 |  |
| 9450 | Colonic Neoplasms | KRT20     | 0.00001  | -7.551308 |  |
| 9451 | Colonic Neoplasms | SCNN1B    | 0.000009 | -7.536482 |  |
| 9452 | Colonic Neoplasms | CFD       | 0        | -7.220538 |  |
| 9453 | Colonic Neoplasms | HLA-DPB1  | 0        | -7.119269 |  |
| 9454 | Colonic Neoplasms | FN1       | 0        | -7.10163  |  |
| 9455 | Colonic Neoplasms | PKIB      | 0.000007 | -6.929861 |  |
| 9456 | Colonic Neoplasms | CFI       | 0        | -6.66807  |  |
| 9457 | Colonic Neoplasms | CA4       | 0        | -6.659526 |  |
| 9458 | Colonic Neoplasms | PIGZ      | 0.00064  | -6.641919 |  |
| 9459 | Colonic Neoplasms | LCP1      | 0        | -6.638313 |  |
| 9460 | Colonic Neoplasms | OLFML2A   | 0        | -6.633112 |  |
| 9461 | Colonic Neoplasms | SCARA5    | 0        | -6.568566 |  |
| 9462 | Colonic Neoplasms | MYLK      | 0        | -6.548969 |  |
| 9463 | Colonic Neoplasms | ANGPTL1   | 0        | -6.533121 |  |
| 9464 | Colonic Neoplasms | ADAMTS9   | 0        | -6.507463 |  |
| 9465 | Colonic Neoplasms | ALOX5AP   | 0        | -6.301728 |  |
| 9466 | Colonic Neoplasms | CDH5      | 0        | -6.20998  |  |
| 9467 | Colonic Neoplasms | PDE9A     | 0        | -6.156069 |  |
| 9468 | Colonic Neoplasms | CLCA1     | 0        | -6.035607 |  |
| 9469 | Colonic Neoplasms | SCGN      | 0        | -6.014832 |  |
| 9470 | Colonic Neoplasms | CYBRD1    | 0        | -5.945017 |  |
| 9471 | Colonic Neoplasms | PYY       | 0.000007 | -5.934439 |  |
| 9472 | Colonic Neoplasms | AQP8      | 0        | -5.791971 |  |
| 9473 | Colonic Neoplasms | LOH11CR2A | 0        | -5.768411 |  |
| 9474 | Colonic Neoplasms | C1RL      | 0        | -5.755454 |  |
| 9475 | Colonic Neoplasms | IGJ       | 0.000115 | -5.661065 |  |
| 9476 | Colonic Neoplasms | C1QA      | 0        | -5.647079 |  |
| 9477 | Colonic Neoplasms | CLEC3B    | 0        | -5.646384 |  |
| 9478 | Colonic Neoplasms | DNASE1L3  | 0        | -5.645055 |  |
| 9479 | Colonic Neoplasms | SOCS3     | 0        | -5.633423 |  |
| 9480 | Colonic Neoplasms | ADH4      | 0        | -5.622253 |  |
| 9481 | Colonic Neoplasms | TNFAIP3   | 0        | -5.612813 |  |
| 9482 | Colonic Neoplasms | HCLS1     | 0        | -5.575544 |  |
| 9483 | Colonic Neoplasms | MUC4      | 0.000036 | -5.548673 |  |
| 9484 | Colonic Neoplasms | LRRC19    | 0.000007 | -5.393298 |  |
| 9485 | Colonic Neoplasms | CD177     | 0        | -5.309023 |  |
| 9486 | Colonic Neoplasms | EDN3      | 0.000002 | -5.280036 |  |
| 9487 | Colonic Neoplasms | APOL3     | 0        | -5.279365 |  |
| 9488 | Colonic Neoplasms | ANPEP     | 0        | -5.185258 |  |
| 9489 | Colonic Neoplasms | GUCA2B    | 0        | -5.131965 |  |
| 9490 | Colonic Neoplasms | HIC1      | 0        | -5.11955  |  |
| 9491 | Colonic Neoplasms | MUCDHL    | 0.000006 | -5.11399  |  |
| 9492 | Colonic Neoplasms | PYY2      | 0.000003 | -5.050842 |  |
| 9493 | Colonic Neoplasms | SDCBP2    | 0.000001 | -5.00517  |  |
| 9494 | Colonic Neoplasms | VSIG2     | 0        | -4.980351 |  |
| 9495 | Colonic Neoplasms | PFDN5     | 0        | -4.975111 |  |
| 9496 | Colonic Neoplasms | SPIB      | 0.000001 | -4.851853 |  |
| 9497 | Colonic Neoplasms | HTRA3     | 0        | -4.850199 |  |
| 9498 | Colonic Neoplasms | RTN1      | 0.000009 | -4.816378 |  |

|      |                   |          |          |           |  |
|------|-------------------|----------|----------|-----------|--|
| 9499 | Colonic Neoplasms | ENTPD5   | 0.00001  | -4.795418 |  |
| 9500 | Colonic Neoplasms | FSTL1    | 0        | -4.781491 |  |
| 9501 | Colonic Neoplasms | CTSO     | 0        | -4.751652 |  |
| 9502 | Colonic Neoplasms | FLJ21511 | 0.000001 | -4.750982 |  |
| 9503 | Colonic Neoplasms | CNR1     | 0        | -4.666203 |  |
| 9504 | Colonic Neoplasms | TTR      | 0.000004 | -4.645625 |  |
| 9505 | Colonic Neoplasms | WFDC1    | 0        | -4.638388 |  |
| 9506 | Colonic Neoplasms | ABI3BP   | 0        | -4.621097 |  |
| 9507 | Colonic Neoplasms | GCNT2    | 0.000158 | -4.60045  |  |
| 9508 | Colonic Neoplasms | GUCA2A   | 0        | -4.594706 |  |
| 9509 | Colonic Neoplasms | CILP     | 0        | -4.580109 |  |
| 9510 | Colonic Neoplasms | ABCC13   | 0.00001  | -4.56359  |  |
| 9511 | Colonic Neoplasms | LGALS4   | 0.000001 | -4.552136 |  |
| 9512 | Colonic Neoplasms | CFHR1    | 0        | -4.520135 |  |
| 9513 | Colonic Neoplasms | SLC2A4   | 0        | -4.477195 |  |
| 9514 | Colonic Neoplasms | MGC4172  | 0        | -4.475538 |  |
| 9515 | Colonic Neoplasms | PI16     | 0        | -4.454597 |  |
| 9516 | Colonic Neoplasms | MS4A7    | 0        | -4.432326 |  |
| 9517 | Colonic Neoplasms | TSPAN1   | 0.000001 | -4.421269 |  |
| 9518 | Colonic Neoplasms | EVL      | 0        | -4.374878 |  |
| 9519 | Colonic Neoplasms | NTN1     | 0        | -4.369826 |  |
| 9520 | Colonic Neoplasms | FLJ32063 | 0.00001  | -4.349534 |  |
| 9521 | Colonic Neoplasms | LGALS2   | 0.000009 | -4.324702 |  |
| 9522 | Colonic Neoplasms | ADAMDEC1 | 0.000008 | -4.322431 |  |
| 9523 | Colonic Neoplasms | SPINK5   | 0.000007 | -4.320209 |  |
| 9524 | Colonic Neoplasms | MT1JP    | 0        | -4.303425 |  |
| 9525 | Colonic Neoplasms | INHBA    | 0        | -4.300894 |  |
| 9526 | Colonic Neoplasms | SERPINF1 | 0        | -4.291443 |  |
| 9527 | Colonic Neoplasms | TNXA     | 0.000599 | -4.287645 |  |
| 9528 | Colonic Neoplasms | TF       | 0.000015 | -4.271676 |  |
| 9529 | Colonic Neoplasms | PLVAP    | 0        | -4.256339 |  |
| 9530 | Colonic Neoplasms | LPHN3    | 0        | -4.236286 |  |
| 9531 | Colonic Neoplasms | XKR4     | 0        | -4.223866 |  |
| 9532 | Colonic Neoplasms | CES2     | 0.000001 | -4.217799 |  |
| 9533 | Colonic Neoplasms | HLA-DOA  | 0        | -4.194262 |  |
| 9534 | Colonic Neoplasms | P2RY13   | 0        | -4.177498 |  |
| 9535 | Colonic Neoplasms | S100A9   | 0        | -4.138247 |  |
| 9536 | Colonic Neoplasms | PLAC8    | 0.000012 | -4.1363   |  |
| 9537 | Colonic Neoplasms | UGT2B4   | 0        | -4.116567 |  |
| 9538 | Colonic Neoplasms | MYOM1    | 0        | -4.090315 |  |
| 9539 | Colonic Neoplasms | EFS      | 0        | -4.075452 |  |
| 9540 | Colonic Neoplasms | FXYD3    | 0        | -4.060949 |  |
| 9541 | Colonic Neoplasms | C11orf33 | 0.000012 | -4.060275 |  |
| 9542 | Colonic Neoplasms | CD84     | 0        | -4.047519 |  |
| 9543 | Colonic Neoplasms | UGT2B7   | 0        | -3.964991 |  |
| 9544 | Colonic Neoplasms | KCNE4    | 0        | -3.956416 |  |
| 9545 | Colonic Neoplasms | ABCA1    | 0        | -3.952417 |  |
| 9546 | Colonic Neoplasms | PPP1R14A | 0        | -3.931288 |  |
| 9547 | Colonic Neoplasms | NEU4     | 0.000001 | -3.914172 |  |
| 9548 | Colonic Neoplasms | PCK1     | 0        | -3.913386 |  |

|      |                   |          |          |           |  |
|------|-------------------|----------|----------|-----------|--|
| 9549 | Colonic Neoplasms | 11-Sep   | 0        | -3.876221 |  |
| 9550 | Colonic Neoplasms | ASB2     | 0        | -3.873691 |  |
| 9551 | Colonic Neoplasms | PTPRH    | 0.000006 | -3.847104 |  |
| 9552 | Colonic Neoplasms | ETHE1    | 0.000001 | -3.835435 |  |
| 9553 | Colonic Neoplasms | PLG      | 0.000007 | -3.798711 |  |
| 9554 | Colonic Neoplasms | KLF4     | 0        | -3.786586 |  |
| 9555 | Colonic Neoplasms | CFH      | 0        | -3.78256  |  |
| 9556 | Colonic Neoplasms | ASPA     | 0        | -3.759596 |  |
| 9557 | Colonic Neoplasms | NMES1    | 0        | -3.734037 |  |
| 9558 | Colonic Neoplasms | AOC3     | 0        | -3.687249 |  |
| 9559 | Colonic Neoplasms | MYOT     | 0        | -3.685809 |  |
| 9560 | Colonic Neoplasms | COX7A1   | 0        | -3.641942 |  |
| 9561 | Colonic Neoplasms | P2RY14   | 0.000446 | -3.628568 |  |
| 9562 | Colonic Neoplasms | SULT1A2  | 0        | -3.60841  |  |
| 9563 | Colonic Neoplasms | DSC2     | 0.000004 | -3.593929 |  |
| 9564 | Colonic Neoplasms | LOXL2    | 0        | -3.584082 |  |
| 9565 | Colonic Neoplasms | UGT1A8   | 0.000013 | -3.581855 |  |
| 9566 | Colonic Neoplasms | SOSTDC1  | 0.000002 | -3.574382 |  |
| 9567 | Colonic Neoplasms | AKAP12   | 0.000109 | -3.559876 |  |
| 9568 | Colonic Neoplasms | SELPLG   | 0        | -3.558714 |  |
| 9569 | Colonic Neoplasms | C2orf40  | 0        | -3.530774 |  |
| 9570 | Colonic Neoplasms | FEV      | 0.000012 | -3.526807 |  |
| 9571 | Colonic Neoplasms | HSD17B2  | 0.00001  | -3.522316 |  |
| 9572 | Colonic Neoplasms | MT1F     | 0.000013 | -3.521489 |  |
| 9573 | Colonic Neoplasms | NR3C2    | 0        | -3.51958  |  |
| 9574 | Colonic Neoplasms | RHBDL2   | 0        | -3.502465 |  |
| 9575 | Colonic Neoplasms | MT1H     | 0.000111 | -3.498151 |  |
| 9576 | Colonic Neoplasms | C17orf91 | 0        | -3.497267 |  |
| 9577 | Colonic Neoplasms | GC       | 0.000002 | -3.48362  |  |
| 9578 | Colonic Neoplasms | ABHD3    | 0.000008 | -3.47626  |  |
| 9579 | Colonic Neoplasms | IL6R     | 0        | -3.472127 |  |
| 9580 | Colonic Neoplasms | MTSS1    | 0.000145 | -3.463537 |  |
| 9581 | Colonic Neoplasms | C1orf115 | 0        | -3.453543 |  |
| 9582 | Colonic Neoplasms | SLAMF8   | 0        | -3.437739 |  |
| 9583 | Colonic Neoplasms | EPHA10   | 0.000008 | -3.435053 |  |
| 9584 | Colonic Neoplasms | BASP1    | 0        | -3.435026 |  |
| 9585 | Colonic Neoplasms | GPA33    | 0.000001 | -3.429682 |  |
| 9586 | Colonic Neoplasms | KRT19    | 0.000002 | -3.421713 |  |
| 9587 | Colonic Neoplasms | APOC1    | 0        | -3.418014 |  |
| 9588 | Colonic Neoplasms | MATN1    | 0        | -3.416291 |  |
| 9589 | Colonic Neoplasms | SEPP1    | 0.000081 | -3.413388 |  |
| 9590 | Colonic Neoplasms | APOA2    | 0.000002 | -3.396929 |  |
| 9591 | Colonic Neoplasms | CRISPLD2 | 0        | -3.394717 |  |
| 9592 | Colonic Neoplasms | NR5A2    | 0.000094 | -3.394343 |  |
| 9593 | Colonic Neoplasms | EYA2     | 0        | -3.391627 |  |
| 9594 | Colonic Neoplasms | TGM2     | 0        | -3.386721 |  |
| 9595 | Colonic Neoplasms | COL6A2   | 0        | -3.38534  |  |
| 9596 | Colonic Neoplasms | ZBTB16   | 0        | -3.381649 |  |
| 9597 | Colonic Neoplasms | ADAMTS1  | 0        | -3.379906 |  |
| 9598 | Colonic Neoplasms | STYK1    | 0        | -3.378539 |  |

|      |                   |             |          |           |  |
|------|-------------------|-------------|----------|-----------|--|
| 9599 | Colonic Neoplasms | CD14        | 0        | -3.370307 |  |
| 9600 | Colonic Neoplasms | CBX7        | 0        | -3.346332 |  |
| 9601 | Colonic Neoplasms | DCN         | 0.000641 | -3.343137 |  |
| 9602 | Colonic Neoplasms | GSN         | 0        | -3.342984 |  |
| 9603 | Colonic Neoplasms | SRI         | 0.000009 | -3.33486  |  |
| 9604 | Colonic Neoplasms | SPON2       | 0        | -3.332667 |  |
| 9605 | Colonic Neoplasms | FXYD1       | 0        | -3.331368 |  |
| 9606 | Colonic Neoplasms | PLEKHO1     | 0        | -3.328679 |  |
| 9607 | Colonic Neoplasms | CHL1        | 0.000158 | -3.319252 |  |
| 9608 | Colonic Neoplasms | DKFZP564O08 | 0.000001 | -3.288601 |  |
| 9609 | Colonic Neoplasms | IL11RA      | 0        | -3.283501 |  |
| 9610 | Colonic Neoplasms | XLKD1       | 0        | -3.279393 |  |
| 9611 | Colonic Neoplasms | CTSG        | 0        | -3.250081 |  |
| 9612 | Colonic Neoplasms | FAM107A     | 0        | -3.249412 |  |
| 9613 | Colonic Neoplasms | PDGFRB      | 0        | -3.236921 |  |
| 9614 | Colonic Neoplasms | LRRN2       | 0        | -3.229834 |  |
| 9615 | Colonic Neoplasms | TP53INP2    | 0        | -3.225235 |  |
| 9616 | Colonic Neoplasms | HBB         | 0        | -3.217454 |  |
| 9617 | Colonic Neoplasms | TXNIP       | 0        | -3.20474  |  |
| 9618 | Colonic Neoplasms | FOXF1       | 0.000296 | -3.198543 |  |
| 9619 | Colonic Neoplasms | FPRL1       | 0.000011 | -3.169335 |  |
| 9620 | Colonic Neoplasms | CYP3A4      | 0.000003 | -3.150967 |  |
| 9621 | Colonic Neoplasms | TMEM220     | 0        | -3.143404 |  |
| 9622 | Colonic Neoplasms | SIDT1       | 0        | -3.139651 |  |
| 9623 | Colonic Neoplasms | SLC9A9      | 0        | -3.13727  |  |
| 9624 | Colonic Neoplasms | SCNN1A      | 0.000005 | -3.135971 |  |
| 9625 | Colonic Neoplasms | PRPH        | 0        | -3.134704 |  |
| 9626 | Colonic Neoplasms | MRVI1       | 0        | -3.128852 |  |
| 9627 | Colonic Neoplasms | NBLA00301   | 0        | -3.122942 |  |
| 9628 | Colonic Neoplasms | TP53I5      | 0.000002 | -3.120461 |  |
| 9629 | Colonic Neoplasms | PXDN        | 0        | -3.110963 |  |
| 9630 | Colonic Neoplasms | PALLD       | 0        | -3.110605 |  |
| 9631 | Colonic Neoplasms | FLJ20152    | 0.000005 | -3.093667 |  |
| 9632 | Colonic Neoplasms | TST         | 0.000001 | -3.086522 |  |
| 9633 | Colonic Neoplasms | IL1R2       | 0.000004 | -3.085178 |  |
| 9634 | Colonic Neoplasms | VSIG4       | 0        | -3.085124 |  |
| 9635 | Colonic Neoplasms | C5orf4      | 0        | -3.081489 |  |
| 9636 | Colonic Neoplasms | HMGCS2      | 0.000001 | -3.080903 |  |
| 9637 | Colonic Neoplasms | ITGAL       | 0        | -3.080831 |  |
| 9638 | Colonic Neoplasms | EPS15       | 0.000149 | -3.080798 |  |
| 9639 | Colonic Neoplasms | RCAN2       | 0        | -3.079993 |  |
| 9640 | Colonic Neoplasms | C6orf29     | 0.000003 | -3.059207 |  |
| 9641 | Colonic Neoplasms | PIGR        | 0.000268 | -3.039826 |  |
| 9642 | Colonic Neoplasms | RGS9        | 0        | -3.036885 |  |
| 9643 | Colonic Neoplasms | FABP1       | 0.000006 | -3.032035 |  |
| 9644 | Colonic Neoplasms | HIG1        | 0.000002 | -3.027138 |  |
| 9645 | Colonic Neoplasms | MT1E        | 0        | -3.02559  |  |
| 9646 | Colonic Neoplasms | BCLP        | 0.000001 | -3.020425 |  |
| 9647 | Colonic Neoplasms | C1QB        | 0        | -3.019289 |  |
| 9648 | Colonic Neoplasms | ZNF575      | 0        | -3.018086 |  |

|      |                   |            |          |           |  |
|------|-------------------|------------|----------|-----------|--|
| 9649 | Colonic Neoplasms | ACACB      | 0.000014 | -3.000493 |  |
| 9650 | Colonic Neoplasms | CYP2C8     | 0.000023 | -2.984006 |  |
| 9651 | Colonic Neoplasms | DUSP26     | 0        | -2.971737 |  |
| 9652 | Colonic Neoplasms | PAH        | 0.000012 | -2.971188 |  |
| 9653 | Colonic Neoplasms | MATN2      | 0        | -2.966749 |  |
| 9654 | Colonic Neoplasms | MYO1A      | 0.000007 | -2.962363 |  |
| 9655 | Colonic Neoplasms | FAM3D      | 0.000002 | -2.95883  |  |
| 9656 | Colonic Neoplasms | TM4SF2     | 0.000002 | -2.95869  |  |
| 9657 | Colonic Neoplasms | TUBB2B     | 0.000163 | -2.956319 |  |
| 9658 | Colonic Neoplasms | SMPD3      | 0.000001 | -2.930047 |  |
| 9659 | Colonic Neoplasms | PECAM1     | 0        | -2.921229 |  |
| 9660 | Colonic Neoplasms | CALCRL     | 0        | -2.917643 |  |
| 9661 | Colonic Neoplasms | MGP        | 0        | -2.910034 |  |
| 9662 | Colonic Neoplasms | DHRS11     | 0.000418 | -2.904213 |  |
| 9663 | Colonic Neoplasms | KRT14      | 0.000004 | -2.898214 |  |
| 9664 | Colonic Neoplasms | AHCYL2     | 0.000358 | -2.889336 |  |
| 9665 | Colonic Neoplasms | PCDH7      | 0        | -2.885336 |  |
| 9666 | Colonic Neoplasms | PPAP2A     | 0        | -2.884461 |  |
| 9667 | Colonic Neoplasms | VILL       | 0.000003 | -2.882666 |  |
| 9668 | Colonic Neoplasms | FMO3       | 0.000103 | -2.866698 |  |
| 9669 | Colonic Neoplasms | MT1G       | 0.000021 | -2.861547 |  |
| 9670 | Colonic Neoplasms | MUSTN1     | 0        | -2.844608 |  |
| 9671 | Colonic Neoplasms | ST6GALNAC6 | 0        | -2.840149 |  |
| 9672 | Colonic Neoplasms | CYP4F12    | 0.000003 | -2.837124 |  |
| 9673 | Colonic Neoplasms | SSPN       | 0        | -2.832805 |  |
| 9674 | Colonic Neoplasms | CLDN7      | 0.000004 | -2.827828 |  |
| 9675 | Colonic Neoplasms | TMEM45B    | 0.000002 | -2.820958 |  |
| 9676 | Colonic Neoplasms | NOTCH3     | 0        | -2.820302 |  |
| 9677 | Colonic Neoplasms | NEDD4L     | 0.00001  | -2.819899 |  |
| 9678 | Colonic Neoplasms | MTM1       | 0.000012 | -2.817681 |  |
| 9679 | Colonic Neoplasms | SEMA4G     | 0.000002 | -2.809155 |  |
| 9680 | Colonic Neoplasms | CHST5      | 0.000004 | -2.795886 |  |
| 9681 | Colonic Neoplasms | PPARGC1A   | 0.000012 | -2.794212 |  |
| 9682 | Colonic Neoplasms | RGS19IP1   | 0.00001  | -2.784519 |  |
| 9683 | Colonic Neoplasms | OPTN       | 0        | -2.78375  |  |
| 9684 | Colonic Neoplasms | FLJ11017   | 0.000002 | -2.782371 |  |
| 9685 | Colonic Neoplasms | LGALS1     | 0        | -2.775313 |  |
| 9686 | Colonic Neoplasms | CTSL1      | 0        | -2.769246 |  |
| 9687 | Colonic Neoplasms | LRRC1      | 0.000013 | -2.764394 |  |
| 9688 | Colonic Neoplasms | LOC440838  | 0.000153 | -2.754453 |  |
| 9689 | Colonic Neoplasms | TUB        | 0.000002 | -2.748186 |  |
| 9690 | Colonic Neoplasms | KIAA0574   | 0        | -2.743239 |  |
| 9691 | Colonic Neoplasms | PDE5A      | 0.000791 | -2.738766 |  |
| 9692 | Colonic Neoplasms | GPC6       | 0        | -2.734977 |  |
| 9693 | Colonic Neoplasms | TIMP2      | 0        | -2.734756 |  |
| 9694 | Colonic Neoplasms | CCL14      | 0.00017  | -2.725208 |  |
| 9695 | Colonic Neoplasms | MGC4171    | 0.00001  | -2.724735 |  |
| 9696 | Colonic Neoplasms | HIGD2A     | 0.000015 | -2.723354 |  |
| 9697 | Colonic Neoplasms | GOLPH2     | 0.000005 | -2.702898 |  |
| 9698 | Colonic Neoplasms | MYL6       | 0        | -2.69657  |  |

|      |                   |           |          |           |  |
|------|-------------------|-----------|----------|-----------|--|
| 9699 | Colonic Neoplasms | SATB2     | 0.000007 | -2.679973 |  |
| 9700 | Colonic Neoplasms | CGN       | 0.000009 | -2.669418 |  |
| 9701 | Colonic Neoplasms | APOE      | 0        | -2.667596 |  |
| 9702 | Colonic Neoplasms | ACADS     | 0        | -2.654603 |  |
| 9703 | Colonic Neoplasms | CD163     | 0        | -2.639177 |  |
| 9704 | Colonic Neoplasms | MT1X      | 0.000586 | -2.638727 |  |
| 9705 | Colonic Neoplasms | ZZEF1     | 0        | -2.63172  |  |
| 9706 | Colonic Neoplasms | HSD17B6   | 0.000957 | -2.620009 |  |
| 9707 | Colonic Neoplasms | KIAA0513  | 0        | -2.615759 |  |
| 9708 | Colonic Neoplasms | PXMP2     | 0        | -2.613262 |  |
| 9709 | Colonic Neoplasms | PIP5K1B   | 0.000006 | -2.603886 |  |
| 9710 | Colonic Neoplasms | FLNC      | 0.000273 | -2.597163 |  |
| 9711 | Colonic Neoplasms | CLMN      | 0.000006 | -2.591893 |  |
| 9712 | Colonic Neoplasms | STAP2     | 0        | -2.586791 |  |
| 9713 | Colonic Neoplasms | FMO4      | 0.000009 | -2.582345 |  |
| 9714 | Colonic Neoplasms | TCF21     | 0        | -2.579042 |  |
| 9715 | Colonic Neoplasms | MSN       | 0        | -2.567381 |  |
| 9716 | Colonic Neoplasms | CKMT1     | 0.000013 | -2.56467  |  |
| 9717 | Colonic Neoplasms | FLJ30901  | 0        | -2.56354  |  |
| 9718 | Colonic Neoplasms | UGP2      | 0        | -2.548487 |  |
| 9719 | Colonic Neoplasms | STOM      | 0        | -2.543023 |  |
| 9720 | Colonic Neoplasms | NANS      | 0.000001 | -2.539289 |  |
| 9721 | Colonic Neoplasms | C9orf19   | 0        | -2.538741 |  |
| 9722 | Colonic Neoplasms | MXRA5     | 0        | -2.538398 |  |
| 9723 | Colonic Neoplasms | SERPINA3  | 0        | -2.531452 |  |
| 9724 | Colonic Neoplasms | CNGA3     | 0        | -2.530801 |  |
| 9725 | Colonic Neoplasms | TDE2L     | 0.000006 | -2.522827 |  |
| 9726 | Colonic Neoplasms | TEF       | 0        | -2.522685 |  |
| 9727 | Colonic Neoplasms | CD74      | 0        | -2.520342 |  |
| 9728 | Colonic Neoplasms | LOC201895 | 0.000001 | -2.520197 |  |
| 9729 | Colonic Neoplasms | RetSat    | 0.000009 | -2.51694  |  |
| 9730 | Colonic Neoplasms | THBD      | 0        | -2.516051 |  |
| 9731 | Colonic Neoplasms | CD3D      | 0        | -2.513778 |  |
| 9732 | Colonic Neoplasms | HLA-DMB   | 0        | -2.513279 |  |
| 9733 | Colonic Neoplasms | GNAI1     | 0.000428 | -2.500595 |  |
| 9734 | Colonic Neoplasms | AP1S2     | 0        | -2.500455 |  |
| 9735 | Colonic Neoplasms | ADH6      | 0        | -2.494864 |  |
| 9736 | Colonic Neoplasms | FLJ20273  | 0.000008 | -2.483385 |  |
| 9737 | Colonic Neoplasms | SERPINA6  | 0.000004 | -2.474711 |  |
| 9738 | Colonic Neoplasms | PLIN      | 0        | -2.469331 |  |
| 9739 | Colonic Neoplasms | FCER1G    | 0        | -2.459957 |  |
| 9740 | Colonic Neoplasms | GNA11     | 0        | -2.459933 |  |
| 9741 | Colonic Neoplasms | FBLN5     | 0.000608 | -2.450308 |  |
| 9742 | Colonic Neoplasms | ANK3      | 0        | -2.447477 |  |
| 9743 | Colonic Neoplasms | GFRA2     | 0        | -2.441722 |  |
| 9744 | Colonic Neoplasms | FLJ34515  | 0        | -2.434938 |  |
| 9745 | Colonic Neoplasms | KLKB1     | 0.000008 | -2.428999 |  |
| 9746 | Colonic Neoplasms | ANXA11    | 0.000009 | -2.425022 |  |
| 9747 | Colonic Neoplasms | FARP1     | 0        | -2.423072 |  |
| 9748 | Colonic Neoplasms | RDH5      | 0        | -2.421524 |  |

|      |                   |             |          |           |  |
|------|-------------------|-------------|----------|-----------|--|
| 9749 | Colonic Neoplasms | PAPSS2      | 0.000012 | -2.421199 |  |
| 9750 | Colonic Neoplasms | LDB2        | 0        | -2.411734 |  |
| 9751 | Colonic Neoplasms | LTBP4       | 0        | -2.401606 |  |
| 9752 | Colonic Neoplasms | FOS         | 0        | -2.399607 |  |
| 9753 | Colonic Neoplasms | TGM4        | 0.000001 | -2.393012 |  |
| 9754 | Colonic Neoplasms | RIOK3       | 0.000007 | -2.387403 |  |
| 9755 | Colonic Neoplasms | PLAT        | 0        | -2.385488 |  |
| 9756 | Colonic Neoplasms | KLF6        | 0        | -2.383907 |  |
| 9757 | Colonic Neoplasms | HOM-TES-103 | 0        | -2.379865 |  |
| 9758 | Colonic Neoplasms | PCSK6       | 0.000006 | -2.366172 |  |
| 9759 | Colonic Neoplasms | PBLD        | 0.000056 | -2.361208 |  |
| 9760 | Colonic Neoplasms | PLCE1       | 0        | -2.360601 |  |
| 9761 | Colonic Neoplasms | TNFSF10     | 0        | -2.359087 |  |
| 9762 | Colonic Neoplasms | NCF1        | 0        | -2.355677 |  |
| 9763 | Colonic Neoplasms | DST         | 0        | -2.355175 |  |
| 9764 | Colonic Neoplasms | FOXN3       | 0        | -2.338288 |  |
| 9765 | Colonic Neoplasms | PPP1R12C    | 0        | -2.334646 |  |
| 9766 | Colonic Neoplasms | TRPM4       | 0.000006 | -2.333557 |  |
| 9767 | Colonic Neoplasms | ARRDC4      | 0        | -2.325857 |  |
| 9768 | Colonic Neoplasms | FGFR2       | 0        | -2.321512 |  |
| 9769 | Colonic Neoplasms | MMP9        | 0        | -2.315868 |  |
| 9770 | Colonic Neoplasms | EPHX2       | 0        | -2.313872 |  |
| 9771 | Colonic Neoplasms | SYTL2       | 0.000012 | -2.312394 |  |
| 9772 | Colonic Neoplasms | RILP        | 0        | -2.310785 |  |
| 9773 | Colonic Neoplasms | ABCA6       | 0        | -2.307646 |  |
| 9774 | Colonic Neoplasms | SPI1        | 0        | -2.303508 |  |
| 9775 | Colonic Neoplasms | SH3BGRL2    | 0.000004 | -2.297834 |  |
| 9776 | Colonic Neoplasms | IL6ST       | 0.00012  | -2.293095 |  |
| 9777 | Colonic Neoplasms | C20orf39    | 0        | -2.290544 |  |
| 9778 | Colonic Neoplasms | PLCD1       | 0        | -2.282423 |  |
| 9779 | Colonic Neoplasms | SLC25A23    | 0        | -2.28045  |  |
| 9780 | Colonic Neoplasms | FLJ14981    | 0.000001 | -2.278628 |  |
| 9781 | Colonic Neoplasms | RBMS1       | 0        | -2.274364 |  |
| 9782 | Colonic Neoplasms | AES         | 0        | -2.268848 |  |
| 9783 | Colonic Neoplasms | CXorf9      | 0        | -2.259197 |  |
| 9784 | Colonic Neoplasms | MAOA        | 0        | -2.259184 |  |
| 9785 | Colonic Neoplasms | EIF4E3      | 0        | -2.254867 |  |
| 9786 | Colonic Neoplasms | LRRC32      | 0        | -2.252156 |  |
| 9787 | Colonic Neoplasms | RHOB        | 0.000018 | -2.246938 |  |
| 9788 | Colonic Neoplasms | MT2A        | 0.000103 | -2.240731 |  |
| 9789 | Colonic Neoplasms | SELM        | 0        | -2.237822 |  |
| 9790 | Colonic Neoplasms | CAS1        | 0        | -2.229294 |  |
| 9791 | Colonic Neoplasms | PDE2A       | 0        | -2.228758 |  |
| 9792 | Colonic Neoplasms | SLC1A7      | 0.000001 | -2.224365 |  |
| 9793 | Colonic Neoplasms | IL1B        | 0        | -2.19842  |  |
| 9794 | Colonic Neoplasms | SLC35A3     | 0.000006 | -2.193479 |  |
| 9795 | Colonic Neoplasms | GALIG       | 0        | -2.192145 |  |
| 9796 | Colonic Neoplasms | GNAQ        | 0.000004 | -2.183832 |  |
| 9797 | Colonic Neoplasms | GSTM2       | 0.000115 | -2.175818 |  |
| 9798 | Colonic Neoplasms | ORF1-FL49   | 0.000001 | -2.166765 |  |

|      |                   |           |          |           |  |
|------|-------------------|-----------|----------|-----------|--|
| 9799 | Colonic Neoplasms | GPD1L     | 0.000012 | -2.159267 |  |
| 9800 | Colonic Neoplasms | PTK6      | 0.000009 | -2.155801 |  |
| 9801 | Colonic Neoplasms | CASQ2     | 0.000094 | -2.147198 |  |
| 9802 | Colonic Neoplasms | CAMK2N1   | 0.000957 | -2.143111 |  |
| 9803 | Colonic Neoplasms | CDH19     | 0.000056 | -2.136546 |  |
| 9804 | Colonic Neoplasms | ACP5      | 0        | -2.136245 |  |
| 9805 | Colonic Neoplasms | OLFML2B   | 0        | -2.133967 |  |
| 9806 | Colonic Neoplasms | HLA-DQB1  | 0        | -2.132024 |  |
| 9807 | Colonic Neoplasms | ZNF219    | 0        | -2.12931  |  |
| 9808 | Colonic Neoplasms | CALM1     | 0        | -2.124523 |  |
| 9809 | Colonic Neoplasms | ADD1      | 0.000146 | -2.122039 |  |
| 9810 | Colonic Neoplasms | GPR176    | 0        | -2.118895 |  |
| 9811 | Colonic Neoplasms | PINK1     | 0        | -2.117277 |  |
| 9812 | Colonic Neoplasms | BCAR3     | 0.000012 | -2.114651 |  |
| 9813 | Colonic Neoplasms | LOC285535 | 0        | -2.111181 |  |
| 9814 | Colonic Neoplasms | CHP       | 0.000003 | -2.107398 |  |
| 9815 | Colonic Neoplasms | GBP2      | 0.000284 | -2.102945 |  |
| 9816 | Colonic Neoplasms | KIAA1737  | 0        | -2.102382 |  |
| 9817 | Colonic Neoplasms | ShrmL     | 0.00001  | -2.101674 |  |
| 9818 | Colonic Neoplasms | FLJ12610  | 0.000009 | -2.095074 |  |
| 9819 | Colonic Neoplasms | IGL@      | 0        | -2.092871 |  |
| 9820 | Colonic Neoplasms | CRY2      | 0        | -2.091582 |  |
| 9821 | Colonic Neoplasms | TOM1L2    | 0        | -2.085025 |  |
| 9822 | Colonic Neoplasms | VAMP8     | 0.000007 | -2.083103 |  |
| 9823 | Colonic Neoplasms | TMEM49    | 0        | -2.07887  |  |
| 9824 | Colonic Neoplasms | UGDH      | 0.000167 | -2.075216 |  |
| 9825 | Colonic Neoplasms | MYO1C     | 0        | -2.074156 |  |
| 9826 | Colonic Neoplasms | NDRG2     | 0        | -2.071264 |  |
| 9827 | Colonic Neoplasms | PLXNA2    | 0.000002 | -2.068311 |  |
| 9828 | Colonic Neoplasms | TFCP2L1   | 0.000006 | -2.064292 |  |
| 9829 | Colonic Neoplasms | TDRD10    | 0        | -2.058953 |  |
| 9830 | Colonic Neoplasms | SQRDL     | 0.000007 | -2.056851 |  |
| 9831 | Colonic Neoplasms | INPP5A    | 0        | -2.056516 |  |
| 9832 | Colonic Neoplasms | GPM6B     | 0.00016  | -2.054248 |  |
| 9833 | Colonic Neoplasms | BTK       | 0        | -2.048221 |  |
| 9834 | Colonic Neoplasms | LARGE     | 0        | -2.046539 |  |
| 9835 | Colonic Neoplasms | PPARGC1B  | 0        | -2.043279 |  |
| 9836 | Colonic Neoplasms | FLJ41603  | 0        | -2.04177  |  |
| 9837 | Colonic Neoplasms | S100A10   | 0.000004 | -2.036907 |  |
| 9838 | Colonic Neoplasms | SYTL4     | 0.000002 | -2.034218 |  |
| 9839 | Colonic Neoplasms | CLTB      | 0.000008 | -2.034168 |  |
| 9840 | Colonic Neoplasms | MAGI2     | 0        | -2.029715 |  |
| 9841 | Colonic Neoplasms | CPT2      | 0        | -2.027885 |  |
| 9842 | Colonic Neoplasms | METTL7A   | 0.000214 | -2.025191 |  |
| 9843 | Colonic Neoplasms | MXI1      | 0        | -2.021021 |  |
| 9844 | Colonic Neoplasms | POLD4     | 0.000002 | -2.014145 |  |
| 9845 | Colonic Neoplasms | LBA1      | 0        | -2.012908 |  |
| 9846 | Colonic Neoplasms | S100B     | 0        | -2.012075 |  |
| 9847 | Colonic Neoplasms | PCSK1N    | 0.000002 | -2.008034 |  |
| 9848 | Colonic Neoplasms | LOC653483 | 0.00001  | -2.006975 |  |



|      |                   |           |          |           |  |
|------|-------------------|-----------|----------|-----------|--|
| 9849 | Colonic Neoplasms | COL6A1    | 0        | -2.006013 |  |
| 9850 | Colonic Neoplasms | CTNND1    | 0.000001 | -2.001972 |  |
| 9851 | Colonic Neoplasms | PRELP     | 0        | -2.000704 |  |
| 9852 | Colonic Neoplasms | IL2RB     | 0        | -2.00014  |  |
| 9853 | Colonic Neoplasms | IBSP      | 0        | 2.003274  |  |
| 9854 | Colonic Neoplasms | TG        | 0        | 2.006777  |  |
| 9855 | Colonic Neoplasms | WDR51B    | 0        | 2.007203  |  |
| 9856 | Colonic Neoplasms | CCT2      | 0.000355 | 2.00934   |  |
| 9857 | Colonic Neoplasms | C5orf46   | 0        | 2.015334  |  |
| 9858 | Colonic Neoplasms | LOC642869 | 0.000007 | 2.017381  |  |
| 9859 | Colonic Neoplasms | HDAC2     | 0.000892 | 2.017489  |  |
| 9860 | Colonic Neoplasms | CBX3      | 0.000003 | 2.02162   |  |
| 9861 | Colonic Neoplasms | G0S2      | 0.000527 | 2.038066  |  |
| 9862 | Colonic Neoplasms | NME1-NME2 | 0.000103 | 2.03843   |  |
| 9863 | Colonic Neoplasms | DKK4      | 0        | 2.040699  |  |
| 9864 | Colonic Neoplasms | C7orf36   | 0        | 2.064753  |  |
| 9865 | Colonic Neoplasms | BMS1      | 0.000648 | 2.07506   |  |
| 9866 | Colonic Neoplasms | GAPDH     | 0.000008 | 2.076062  |  |
| 9867 | Colonic Neoplasms | EIF2C2    | 0.000983 | 2.081042  |  |
| 9868 | Colonic Neoplasms | PPRC1     | 0.000565 | 2.084755  |  |
| 9869 | Colonic Neoplasms | COL1A2    | 0.000004 | 2.086781  |  |
| 9870 | Colonic Neoplasms | KIAA0907  | 0.000141 | 2.092142  |  |
| 9871 | Colonic Neoplasms | TUBA4A    | 0.000277 | 2.100791  |  |
| 9872 | Colonic Neoplasms | CLEC5A    | 0        | 2.101128  |  |
| 9873 | Colonic Neoplasms | FLJ10826  | 0.000009 | 2.102346  |  |
| 9874 | Colonic Neoplasms | GSTO1     | 0.000868 | 2.103585  |  |
| 9875 | Colonic Neoplasms | SFTA2     | 0        | 2.108096  |  |
| 9876 | Colonic Neoplasms | SNRPE     | 0.000957 | 2.108572  |  |
| 9877 | Colonic Neoplasms | ACAN      | 0        | 2.11174   |  |
| 9878 | Colonic Neoplasms | CTSK      | 0        | 2.137342  |  |
| 9879 | Colonic Neoplasms | EGFL6     | 0.000026 | 2.144819  |  |
| 9880 | Colonic Neoplasms | RPL28     | 0.000284 | 2.146094  |  |
| 9881 | Colonic Neoplasms | SOX4      | 0.00051  | 2.147721  |  |
| 9882 | Colonic Neoplasms | IFITM1    | 0.000001 | 2.159871  |  |
| 9883 | Colonic Neoplasms | IL24      | 0        | 2.168089  |  |
| 9884 | Colonic Neoplasms | TKT       | 0.000214 | 2.173743  |  |
| 9885 | Colonic Neoplasms | ZNF259    | 0.000263 | 2.187872  |  |
| 9886 | Colonic Neoplasms | LPGAT1    | 0.000214 | 2.192642  |  |
| 9887 | Colonic Neoplasms | CCND2     | 0.000586 | 2.19821   |  |
| 9888 | Colonic Neoplasms | LIPG      | 0        | 2.199623  |  |
| 9889 | Colonic Neoplasms | ALG5      | 0        | 2.216436  |  |
| 9890 | Colonic Neoplasms | SHMT2     | 0.000499 | 2.231696  |  |
| 9891 | Colonic Neoplasms | SULF1     | 0.000019 | 2.235576  |  |
| 9892 | Colonic Neoplasms | FEN1      | 0.000282 | 2.247685  |  |
| 9893 | Colonic Neoplasms | TRIM21    | 0.000005 | 2.260939  |  |
| 9894 | Colonic Neoplasms | CEACAM5   | 0.000104 | 2.273474  |  |
| 9895 | Colonic Neoplasms | IGHMBP2   | 0        | 2.281069  |  |
| 9896 | Colonic Neoplasms | DIAPH1    | 0.000277 | 2.289976  |  |
| 9897 | Colonic Neoplasms | NPAS2     | 0.000307 | 2.31264   |  |
| 9898 | Colonic Neoplasms | CMTM8     | 0        | 2.325083  |  |

|      |                   |              |          |          |  |
|------|-------------------|--------------|----------|----------|--|
| 9899 | Colonic Neoplasms | LOC100133056 | 0        | 2.328852 |  |
| 9900 | Colonic Neoplasms | SNRPF        | 0.000586 | 2.337388 |  |
| 9901 | Colonic Neoplasms | CCND1        | 0.000167 | 2.37227  |  |
| 9902 | Colonic Neoplasms | KIAA1257     | 0        | 2.392024 |  |
| 9903 | Colonic Neoplasms | GALNT6       | 0        | 2.39372  |  |
| 9904 | Colonic Neoplasms | PTTG1        | 0.000355 | 2.399344 |  |
| 9905 | Colonic Neoplasms | BARX1        | 0.000009 | 2.406034 |  |
| 9906 | Colonic Neoplasms | COL11A1      | 0        | 2.408898 |  |
| 9907 | Colonic Neoplasms | hCG_1981531  | 0        | 2.40923  |  |
| 9908 | Colonic Neoplasms | E2F3         | 0.000284 | 2.418337 |  |
| 9909 | Colonic Neoplasms | CCL11        | 0.000018 | 2.447059 |  |
| 9910 | Colonic Neoplasms | NOL8         | 0.000116 | 2.460398 |  |
| 9911 | Colonic Neoplasms | PDXK         | 0.000174 | 2.460748 |  |
| 9912 | Colonic Neoplasms | MARCKSL1     | 0.000038 | 2.462448 |  |
| 9913 | Colonic Neoplasms | PDPN         | 0        | 2.501963 |  |
| 9914 | Colonic Neoplasms | C12orf48     | 0.000192 | 2.508405 |  |
| 9915 | Colonic Neoplasms | PRSS22       | 0        | 2.510166 |  |
| 9916 | Colonic Neoplasms | PKM2         | 0.000527 | 2.525776 |  |
| 9917 | Colonic Neoplasms | GNL3         | 0.000862 | 2.527467 |  |
| 9918 | Colonic Neoplasms | SERPINE2     | 0.00017  | 2.527904 |  |
| 9919 | Colonic Neoplasms | TAF1D        | 0.00002  | 2.528423 |  |
| 9920 | Colonic Neoplasms | IARS         | 0.000066 | 2.534859 |  |
| 9921 | Colonic Neoplasms | GPR56        | 0        | 2.556583 |  |
| 9922 | Colonic Neoplasms | OLA1         | 0.000115 | 2.567925 |  |
| 9923 | Colonic Neoplasms | KLK7         | 0        | 2.5896   |  |
| 9924 | Colonic Neoplasms | SLC7A5       | 0.000115 | 2.609348 |  |
| 9925 | Colonic Neoplasms | C2orf70      | 0        | 2.620584 |  |
| 9926 | Colonic Neoplasms | MGC4308      | 0.000012 | 2.624252 |  |
| 9927 | Colonic Neoplasms | SLC6A20      | 0        | 2.639076 |  |
| 9928 | Colonic Neoplasms | SRPX2        | 0        | 2.686563 |  |
| 9929 | Colonic Neoplasms | ZNF593       | 0.000689 | 2.699951 |  |
| 9930 | Colonic Neoplasms | METTL13      | 0.000434 | 2.712642 |  |
| 9931 | Colonic Neoplasms | RAD54B       | 0.000645 | 2.728082 |  |
| 9932 | Colonic Neoplasms | RUVBL2       | 0.000983 | 2.736516 |  |
| 9933 | Colonic Neoplasms | SULT1C2      | 0.000809 | 2.7538   |  |
| 9934 | Colonic Neoplasms | GTF2IRD1     | 0.000086 | 2.765354 |  |
| 9935 | Colonic Neoplasms | FUT1         | 0        | 2.815054 |  |
| 9936 | Colonic Neoplasms | RAD23B       | 0.00064  | 2.859517 |  |
| 9937 | Colonic Neoplasms | WISP1        | 0        | 2.875563 |  |
| 9938 | Colonic Neoplasms | CDK1         | 0.000371 | 2.916923 |  |
| 9939 | Colonic Neoplasms | TPD52L1      | 0.000259 | 2.917089 |  |
| 9940 | Colonic Neoplasms | CXCL6        | 0        | 2.921339 |  |
| 9941 | Colonic Neoplasms | CCT6A        | 0.000387 | 2.927714 |  |
| 9942 | Colonic Neoplasms | DTL          | 0.000149 | 2.931445 |  |
| 9943 | Colonic Neoplasms | NFE2L3       | 0.000163 | 2.939272 |  |
| 9944 | Colonic Neoplasms | ENC1         | 0        | 2.981497 |  |
| 9945 | Colonic Neoplasms | NOP16        | 0.000752 | 3.023389 |  |
| 9946 | Colonic Neoplasms | RNF183       | 0        | 3.027376 |  |
| 9947 | Colonic Neoplasms | MMP11        | 0        | 3.072586 |  |
| 9948 | Colonic Neoplasms | UTP14A       | 0.000259 | 3.072644 |  |

|      |                   |          |          |          |  |
|------|-------------------|----------|----------|----------|--|
| 9949 | Colonic Neoplasms | PPAT     | 0.000009 | 3.082995 |  |
| 9950 | Colonic Neoplasms | CSE1L    | 0.000237 | 3.144743 |  |
| 9951 | Colonic Neoplasms | ANKLE2   | 0.000987 | 3.151218 |  |
| 9952 | Colonic Neoplasms | CCNT1    | 0        | 3.171019 |  |
| 9953 | Colonic Neoplasms | DKC1     | 0.000152 | 3.185826 |  |
| 9954 | Colonic Neoplasms | KIF26B   | 0        | 3.195147 |  |
| 9955 | Colonic Neoplasms | CCL20    | 0.000014 | 3.200013 |  |
| 9956 | Colonic Neoplasms | EEF1E1   | 0.000375 | 3.219963 |  |
| 9957 | Colonic Neoplasms | FAM150A  | 0        | 3.226216 |  |
| 9958 | Colonic Neoplasms | MKI67    | 0.000284 | 3.320027 |  |
| 9959 | Colonic Neoplasms | DSG3     | 0        | 3.327281 |  |
| 9960 | Colonic Neoplasms | GART     | 0.000355 | 3.327338 |  |
| 9961 | Colonic Neoplasms | KCNH8    | 0        | 3.352898 |  |
| 9962 | Colonic Neoplasms | CKS2     | 0.000011 | 3.385444 |  |
| 9963 | Colonic Neoplasms | IGFL2    | 0        | 3.42052  |  |
| 9964 | Colonic Neoplasms | KPNA2    | 0.000286 | 3.504182 |  |
| 9965 | Colonic Neoplasms | SOX9     | 0        | 3.525201 |  |
| 9966 | Colonic Neoplasms | PUS7     | 0.000326 | 3.547257 |  |
| 9967 | Colonic Neoplasms | DACH1    | 0        | 3.730219 |  |
| 9968 | Colonic Neoplasms | SORD     | 0.000036 | 3.795572 |  |
| 9969 | Colonic Neoplasms | HSPH1    | 0.000271 | 3.842682 |  |
| 9970 | Colonic Neoplasms | TRIP13   | 0.000158 | 3.871768 |  |
| 9971 | Colonic Neoplasms | PERP     | 0.00016  | 3.924924 |  |
| 9972 | Colonic Neoplasms | RRM2     | 0.000829 | 3.969704 |  |
| 9973 | Colonic Neoplasms | BUB1     | 0.000689 | 3.980634 |  |
| 9974 | Colonic Neoplasms | MACC1    | 0        | 4.066287 |  |
| 9975 | Colonic Neoplasms | DPEP1    | 0        | 4.128487 |  |
| 9976 | Colonic Neoplasms | ECT2     | 0.000004 | 4.15265  |  |
| 9977 | Colonic Neoplasms | NEK2     | 0.000166 | 4.180412 |  |
| 9978 | Colonic Neoplasms | HOMER1   | 0.000221 | 4.184058 |  |
| 9979 | Colonic Neoplasms | SLC12A2  | 0        | 4.198403 |  |
| 9980 | Colonic Neoplasms | KLK12    | 0        | 4.257902 |  |
| 9981 | Colonic Neoplasms | CENPA    | 0.000102 | 4.326599 |  |
| 9982 | Colonic Neoplasms | MAD2L1   | 0.000242 | 4.362649 |  |
| 9983 | Colonic Neoplasms | MET      | 0.000367 | 4.404876 |  |
| 9984 | Colonic Neoplasms | KRT6B    | 0        | 4.60545  |  |
| 9985 | Colonic Neoplasms | MMP10    | 0        | 4.667151 |  |
| 9986 | Colonic Neoplasms | PI3      | 0        | 4.702185 |  |
| 9987 | Colonic Neoplasms | SCD      | 0.00023  | 4.81501  |  |
| 9988 | Colonic Neoplasms | COL10A1  | 0        | 4.817021 |  |
| 9989 | Colonic Neoplasms | C10orf81 | 0        | 5.202957 |  |
| 9990 | Colonic Neoplasms | ASCL2    | 0        | 5.255321 |  |
| 9991 | Colonic Neoplasms | KLK10    | 0        | 5.296705 |  |
| 9992 | Colonic Neoplasms | CXCL5    | 0        | 5.376774 |  |
| 9993 | Colonic Neoplasms | CDH3     | 0.000006 | 5.459597 |  |
| 9994 | Colonic Neoplasms | VSNL1    | 0.000983 | 5.515369 |  |
| 9995 | Colonic Neoplasms | RNF43    | 0.000174 | 6.508152 |  |
| 9996 | Colonic Neoplasms | S100A2   | 0.000066 | 7.870126 |  |
| 9997 | Colonic Neoplasms | MMP7     | 0        | 8.884969 |  |
| 9998 | Colonic Neoplasms | TGFB1    | 0.000296 | 9.104031 |  |

|       |                   |              |          |            |  |
|-------|-------------------|--------------|----------|------------|--|
| 9999  | Colonic Neoplasms | SERPINB5     | 0.000641 | 38.043312  |  |
| 10000 | Colorectal Cancer | MUC4         | 0.001993 | -60.311531 |  |
| 10001 | Colorectal Cancer | MUC2         | 0.001405 | -60.058351 |  |
| 10002 | Colorectal Cancer | FOXP2        | 0.002498 | -27.659136 |  |
| 10003 | Colorectal Cancer | B3GNT6       | 0.000062 | -27.448227 |  |
| 10004 | Colorectal Cancer | SCGB2A1      | 0.00296  | -25.494518 |  |
| 10005 | Colorectal Cancer | MMP28        | 0.00029  | -24.383882 |  |
| 10006 | Colorectal Cancer | KCNMA1       | 0.000529 | -21.649194 |  |
| 10007 | Colorectal Cancer | LRMP         | 0.0036   | -20.996778 |  |
| 10008 | Colorectal Cancer | CWH43        | 0.00122  | -20.467763 |  |
| 10009 | Colorectal Cancer | SERTAD4      | 0.000207 | -20.029386 |  |
| 10010 | Colorectal Cancer | SPDEF        | 0.003466 | -18.98549  |  |
| 10011 | Colorectal Cancer | LOC100509635 | 0.000651 | -16.450784 |  |
| 10012 | Colorectal Cancer | CHST5        | 0.003988 | -16.204897 |  |
| 10013 | Colorectal Cancer | ANO5         | 0.000982 | -15.875208 |  |
| 10014 | Colorectal Cancer | AKAP5        | 0.000488 | -13.182194 |  |
| 10015 | Colorectal Cancer | PTGDR        | 0.001995 | -11.897712 |  |
| 10016 | Colorectal Cancer | CD1D         | 0.000358 | -11.888861 |  |
| 10017 | Colorectal Cancer | KLF9         | 0.003783 | -11.537512 |  |
| 10018 | Colorectal Cancer | SPINK4       | 0        | -10.604966 |  |
| 10019 | Colorectal Cancer | SCIN         | 0.000675 | -10.535578 |  |
| 10020 | Colorectal Cancer | ZG16         | 0.000001 | -10.523496 |  |
| 10021 | Colorectal Cancer | ACOT11       | 0.004247 | -10.396793 |  |
| 10022 | Colorectal Cancer | METTL7A      | 0.000403 | -10.26555  |  |
| 10023 | Colorectal Cancer | PPP1R9A      | 0.000004 | -10.144455 |  |
| 10024 | Colorectal Cancer | CA4          | 0.000001 | -10.09118  |  |
| 10025 | Colorectal Cancer | DQX1         | 0.004044 | -10.025782 |  |
| 10026 | Colorectal Cancer | CREB3L1      | 0.003101 | -9.594399  |  |
| 10027 | Colorectal Cancer | RAB27B       | 0.000026 | -9.499798  |  |
| 10028 | Colorectal Cancer | CACNB2       | 0.000114 | -9.483538  |  |
| 10029 | Colorectal Cancer | ASAP3        | 0.002559 | -9.13715   |  |
| 10030 | Colorectal Cancer | ZBTB7C       | 0.00056  | -9.045275  |  |
| 10031 | Colorectal Cancer | FOXA1        | 0.003339 | -8.939768  |  |
| 10032 | Colorectal Cancer | ALDH1A1      | 0.003273 | -8.905504  |  |
| 10033 | Colorectal Cancer | PADI2        | 0.00277  | -8.762223  |  |
| 10034 | Colorectal Cancer | FABP1        | 0        | -8.719388  |  |
| 10035 | Colorectal Cancer | SYT17        | 0.000365 | -8.713691  |  |
| 10036 | Colorectal Cancer | KCNK10       | 0.000558 | -8.692129  |  |
| 10037 | Colorectal Cancer | LOC100129069 | 0.001754 | -8.641304  |  |
| 10038 | Colorectal Cancer | HMGCS2       | 0.000405 | -8.54771   |  |
| 10039 | Colorectal Cancer | HGD          | 0.001124 | -8.34414   |  |
| 10040 | Colorectal Cancer | FLJ32063     | 0.00281  | -8.296896  |  |
| 10041 | Colorectal Cancer | CLCA4        | 0.000002 | -8.038073  |  |
| 10042 | Colorectal Cancer | CEACAM7      | 0.000001 | -7.835955  |  |
| 10043 | Colorectal Cancer | NR3C2        | 0.000114 | -7.832787  |  |
| 10044 | Colorectal Cancer | ITM2A        | 0.004857 | -7.7829    |  |
| 10045 | Colorectal Cancer | TPBG         | 0.005167 | -7.771458  |  |
| 10046 | Colorectal Cancer | KLF4         | 0.003466 | -7.611532  |  |
| 10047 | Colorectal Cancer | GLIS3        | 0.000782 | -7.497044  |  |
| 10048 | Colorectal Cancer | ERN2         | 0.000972 | -7.486607  |  |

|       |                   |           |          |           |  |
|-------|-------------------|-----------|----------|-----------|--|
| 10049 | Colorectal Cancer | MOGAT2    | 0.000358 | -7.460037 |  |
| 10050 | Colorectal Cancer | B3GALT5   | 0.000358 | -7.341713 |  |
| 10051 | Colorectal Cancer | OR51I1    | 0.004706 | -7.291565 |  |
| 10052 | Colorectal Cancer | EFNA5     | 0.000405 | -7.221174 |  |
| 10053 | Colorectal Cancer | DOCK8     | 0.004993 | -7.212796 |  |
| 10054 | Colorectal Cancer | LAMA1     | 0.002619 | -7.153433 |  |
| 10055 | Colorectal Cancer | C14orf50  | 0.000358 | -7.032244 |  |
| 10056 | Colorectal Cancer | GRAMD3    | 0.000488 | -6.964465 |  |
| 10057 | Colorectal Cancer | CCNJL     | 0.000163 | -6.772087 |  |
| 10058 | Colorectal Cancer | C11orf93  | 0.001565 | -6.711384 |  |
| 10059 | Colorectal Cancer | SPATA18   | 0.003433 | -6.664482 |  |
| 10060 | Colorectal Cancer | FARSB     | 0.00277  | -6.56314  |  |
| 10061 | Colorectal Cancer | DPF3      | 0.000202 | -6.507991 |  |
| 10062 | Colorectal Cancer | PLCE1     | 0.00071  | -6.424479 |  |
| 10063 | Colorectal Cancer | MDFIC     | 0.000923 | -6.391231 |  |
| 10064 | Colorectal Cancer | PLCL2     | 0.003101 | -6.299826 |  |
| 10065 | Colorectal Cancer | CHGA      | 0.000004 | -6.084005 |  |
| 10066 | Colorectal Cancer | CBFA2T3   | 0.000405 | -6.06337  |  |
| 10067 | Colorectal Cancer | HPGDS     | 0.00138  | -5.994216 |  |
| 10068 | Colorectal Cancer | PSMG4     | 0.00332  | -5.931413 |  |
| 10069 | Colorectal Cancer | EDIL3     | 0.001296 | -5.905179 |  |
| 10070 | Colorectal Cancer | SLC9A2    | 0.004579 | -5.796233 |  |
| 10071 | Colorectal Cancer | FRMD3     | 0.004638 | -5.691552 |  |
| 10072 | Colorectal Cancer | SLC16A7   | 0.003386 | -5.613971 |  |
| 10073 | Colorectal Cancer | ACTG2     | 0        | -5.576115 |  |
| 10074 | Colorectal Cancer | AQP8      | 0.000157 | -5.570023 |  |
| 10075 | Colorectal Cancer | CHP2      | 0.004857 | -5.506835 |  |
| 10076 | Colorectal Cancer | MS4A12    | 0.000032 | -5.360331 |  |
| 10077 | Colorectal Cancer | PDE4D     | 0.000331 | -5.300381 |  |
| 10078 | Colorectal Cancer | LOC643072 | 0.003988 | -5.284507 |  |
| 10079 | Colorectal Cancer | PRKACB    | 0.000052 | -5.284016 |  |
| 10080 | Colorectal Cancer | RNF125    | 0.003737 | -5.236229 |  |
| 10081 | Colorectal Cancer | SIDT1     | 0.000358 | -5.216442 |  |
| 10082 | Colorectal Cancer | MATN2     | 0.000471 | -5.191578 |  |
| 10083 | Colorectal Cancer | MCTP2     | 0.000114 | -5.145834 |  |
| 10084 | Colorectal Cancer | VSTM2A    | 0.002883 | -5.04434  |  |
| 10085 | Colorectal Cancer | NR5A2     | 0.00211  | -5.041885 |  |
| 10086 | Colorectal Cancer | TNFRSF11A | 0.000529 | -4.980546 |  |
| 10087 | Colorectal Cancer | EFHC2     | 0.000215 | -4.968653 |  |
| 10088 | Colorectal Cancer | VILL      | 0.000651 | -4.956432 |  |
| 10089 | Colorectal Cancer | GOLM1     | 0.000215 | -4.926988 |  |
| 10090 | Colorectal Cancer | DENND1B   | 0.002619 | -4.908923 |  |
| 10091 | Colorectal Cancer | C2orf88   | 0.001516 | -4.861751 |  |
| 10092 | Colorectal Cancer | KIAA1731  | 0.004141 | -4.835946 |  |
| 10093 | Colorectal Cancer | DEGS2     | 0.004217 | -4.794887 |  |
| 10094 | Colorectal Cancer | KSR2      | 0.004857 | -4.793552 |  |
| 10095 | Colorectal Cancer | TRPM6     | 0.000711 | -4.765605 |  |
| 10096 | Colorectal Cancer | TEX9      | 0.003737 | -4.753316 |  |
| 10097 | Colorectal Cancer | TEP1      | 0.00237  | -4.711473 |  |
| 10098 | Colorectal Cancer | KLK1      | 0.00332  | -4.696096 |  |

|       |                   |              |          |           |  |
|-------|-------------------|--------------|----------|-----------|--|
| 10099 | Colorectal Cancer | LOC100506589 | 0.001854 | -4.673174 |  |
| 10100 | Colorectal Cancer | CCL28        | 0.000605 | -4.654903 |  |
| 10101 | Colorectal Cancer | C16orf53     | 0.003149 | -4.649649 |  |
| 10102 | Colorectal Cancer | BMP2         | 0.004341 | -4.567065 |  |
| 10103 | Colorectal Cancer | GNE          | 0.004141 | -4.563829 |  |
| 10104 | Colorectal Cancer | TOX          | 0.001493 | -4.475666 |  |
| 10105 | Colorectal Cancer | PARVA        | 0.002922 | -4.438447 |  |
| 10106 | Colorectal Cancer | SSTR1        | 0.003988 | -4.42735  |  |
| 10107 | Colorectal Cancer | SIAE         | 0.001854 | -4.411799 |  |
| 10108 | Colorectal Cancer | RAB27A       | 0.00002  | -4.39503  |  |
| 10109 | Colorectal Cancer | ARMCX4       | 0.003737 | -4.391212 |  |
| 10110 | Colorectal Cancer | LOC727916    | 0.005164 | -4.380807 |  |
| 10111 | Colorectal Cancer | FAS          | 0.002883 | -4.344731 |  |
| 10112 | Colorectal Cancer | LXN          | 0.001245 | -4.295182 |  |
| 10113 | Colorectal Cancer | LOC100128288 | 0.004857 | -4.240265 |  |
| 10114 | Colorectal Cancer | FYB          | 0.003433 | -4.225236 |  |
| 10115 | Colorectal Cancer | DDX26B       | 0.004644 | -4.223636 |  |
| 10116 | Colorectal Cancer | ANG          | 0.000488 | -4.192727 |  |
| 10117 | Colorectal Cancer | LOC100216546 | 0.000776 | -4.176673 |  |
| 10118 | Colorectal Cancer | EBF1         | 0.004544 | -4.164009 |  |
| 10119 | Colorectal Cancer | TEX11        | 0.001604 | -4.140414 |  |
| 10120 | Colorectal Cancer | PLAC8        | 0.000009 | -4.134202 |  |
| 10121 | Colorectal Cancer | STYK1        | 0.000446 | -4.069078 |  |
| 10122 | Colorectal Cancer | TCEA3        | 0.003014 | -4.058089 |  |
| 10123 | Colorectal Cancer | CXCL14       | 0.000133 | -4.05581  |  |
| 10124 | Colorectal Cancer | LOC728903    | 0.001325 | -4.04142  |  |
| 10125 | Colorectal Cancer | PAFAH2       | 0.001196 | -4.022292 |  |
| 10126 | Colorectal Cancer | KCTD1        | 0.00296  | -4.01414  |  |
| 10127 | Colorectal Cancer | GPR27        | 0.004668 | -4.013727 |  |
| 10128 | Colorectal Cancer | QSOX1        | 0.003047 | -3.986606 |  |
| 10129 | Colorectal Cancer | UBQLN4       | 0.004931 | -3.93261  |  |
| 10130 | Colorectal Cancer | EHF          | 0.001404 | -3.901229 |  |
| 10131 | Colorectal Cancer | CARD16       | 0.003031 | -3.878799 |  |
| 10132 | Colorectal Cancer | CAPN13       | 0.002883 | -3.8648   |  |
| 10133 | Colorectal Cancer | TTLL5        | 0.004629 | -3.848962 |  |
| 10134 | Colorectal Cancer | DST          | 0        | -3.84509  |  |
| 10135 | Colorectal Cancer | C4orf34      | 0.000493 | -3.841658 |  |
| 10136 | Colorectal Cancer | BCAR3        | 0.001754 | -3.82109  |  |
| 10137 | Colorectal Cancer | C1orf21      | 0.000694 | -3.812153 |  |
| 10138 | Colorectal Cancer | SYTL2        | 0.001871 | -3.807608 |  |
| 10139 | Colorectal Cancer | ITLN1        | 0        | -3.790869 |  |
| 10140 | Colorectal Cancer | ACVRL1       | 0.002015 | -3.786947 |  |
| 10141 | Colorectal Cancer | PHF7         | 0.004347 | -3.782336 |  |
| 10142 | Colorectal Cancer | CCDC68       | 0.002058 | -3.775933 |  |
| 10143 | Colorectal Cancer | ADH6         | 0.002922 | -3.740311 |  |
| 10144 | Colorectal Cancer | HNRNPD       | 0.004611 | -3.731405 |  |
| 10145 | Colorectal Cancer | RAB26        | 0.00113  | -3.719949 |  |
| 10146 | Colorectal Cancer | SPECC1       | 0.004848 | -3.698745 |  |
| 10147 | Colorectal Cancer | SFRS18       | 0.001805 | -3.6981   |  |
| 10148 | Colorectal Cancer | ABCA5        | 0.004638 | -3.659734 |  |

|       |                   |              |          |           |  |
|-------|-------------------|--------------|----------|-----------|--|
| 10149 | Colorectal Cancer | CLMN         | 0.000358 | -3.643807 |  |
| 10150 | Colorectal Cancer | FAM149A      | 0.004517 | -3.641557 |  |
| 10151 | Colorectal Cancer | MAOA         | 0.00219  | -3.624132 |  |
| 10152 | Colorectal Cancer | C14orf106    | 0.004644 | -3.614466 |  |
| 10153 | Colorectal Cancer | FBLN1        | 0.000002 | -3.606652 |  |
| 10154 | Colorectal Cancer | VPS26A       | 0.002559 | -3.599722 |  |
| 10155 | Colorectal Cancer | TRAPPC10     | 0.00293  | -3.583657 |  |
| 10156 | Colorectal Cancer | TPSG1        | 0        | -3.549494 |  |
| 10157 | Colorectal Cancer | DMXL2        | 0.002619 | -3.539085 |  |
| 10158 | Colorectal Cancer | ARMC8        | 0.00345  | -3.52509  |  |
| 10159 | Colorectal Cancer | ADAMDEC1     | 0.000004 | -3.51873  |  |
| 10160 | Colorectal Cancer | FLJ27352     | 0.001463 | -3.511211 |  |
| 10161 | Colorectal Cancer | REG4         | 0.000059 | -3.503367 |  |
| 10162 | Colorectal Cancer | PTPN21       | 0.001057 | -3.479038 |  |
| 10163 | Colorectal Cancer | SAMD13       | 0.000333 | -3.468445 |  |
| 10164 | Colorectal Cancer | FRMD4B       | 0.0037   | -3.467352 |  |
| 10165 | Colorectal Cancer | NCRNA00081   | 0.000927 | -3.424376 |  |
| 10166 | Colorectal Cancer | PYY          | 0.000183 | -3.420898 |  |
| 10167 | Colorectal Cancer | AKAP10       | 0.003047 | -3.41148  |  |
| 10168 | Colorectal Cancer | LIMA1        | 0.003047 | -3.393403 |  |
| 10169 | Colorectal Cancer | EHHADH       | 0.004243 | -3.390529 |  |
| 10170 | Colorectal Cancer | ENTPD5       | 0.004217 | -3.376918 |  |
| 10171 | Colorectal Cancer | FLJ23867     | 0.000215 | -3.375153 |  |
| 10172 | Colorectal Cancer | PGAP1        | 0.001395 | -3.368329 |  |
| 10173 | Colorectal Cancer | RAP1GAP      | 0.004544 | -3.366309 |  |
| 10174 | Colorectal Cancer | SEMA6A       | 0.003988 | -3.359076 |  |
| 10175 | Colorectal Cancer | KIAA1324     | 0.00219  | -3.346923 |  |
| 10176 | Colorectal Cancer | MGC21881     | 0.004483 | -3.345753 |  |
| 10177 | Colorectal Cancer | MMP3         | 0.000106 | -3.344679 |  |
| 10178 | Colorectal Cancer | MGLL         | 0        | -3.330854 |  |
| 10179 | Colorectal Cancer | SBF2         | 0.000987 | -3.325026 |  |
| 10180 | Colorectal Cancer | ENOSF1       | 0.000324 | -3.307115 |  |
| 10181 | Colorectal Cancer | ATP8B1       | 0.001005 | -3.299743 |  |
| 10182 | Colorectal Cancer | NAB1         | 0.001404 | -3.298022 |  |
| 10183 | Colorectal Cancer | CAPN5        | 0.00049  | -3.289094 |  |
| 10184 | Colorectal Cancer | SLC44A1      | 0.000488 | -3.283266 |  |
| 10185 | Colorectal Cancer | PRORS1P      | 0.000953 | -3.274898 |  |
| 10186 | Colorectal Cancer | SLC22A23     | 0.000488 | -3.272734 |  |
| 10187 | Colorectal Cancer | LOC100289632 | 0.002906 | -3.25408  |  |
| 10188 | Colorectal Cancer | CHD9         | 0.000795 | -3.253819 |  |
| 10189 | Colorectal Cancer | DAPP1        | 0.004176 | -3.24881  |  |
| 10190 | Colorectal Cancer | SLC35A1      | 0.000136 | -3.233704 |  |
| 10191 | Colorectal Cancer | SIPA1L2      | 0.004857 | -3.210274 |  |
| 10192 | Colorectal Cancer | KIAA1370     | 0.002922 | -3.207262 |  |
| 10193 | Colorectal Cancer | GNAQ         | 0.001906 | -3.202496 |  |
| 10194 | Colorectal Cancer | PTPRH        | 0.004811 | -3.182022 |  |
| 10195 | Colorectal Cancer | PLEKHH1      | 0.001405 | -3.180597 |  |
| 10196 | Colorectal Cancer | KIF13A       | 0.000802 | -3.177314 |  |
| 10197 | Colorectal Cancer | ALDH6A1      | 0.002957 | -3.169574 |  |
| 10198 | Colorectal Cancer | PPP1R12B     | 0.003424 | -3.145353 |  |

|       |                   |              |          |           |  |
|-------|-------------------|--------------|----------|-----------|--|
| 10199 | Colorectal Cancer | LEAP2        | 0.000488 | -3.125762 |  |
| 10200 | Colorectal Cancer | AHNAK        | 0.002883 | -3.114242 |  |
| 10201 | Colorectal Cancer | MEIS3P1      | 0.002861 | -3.102961 |  |
| 10202 | Colorectal Cancer | TET2         | 0.00293  | -3.096987 |  |
| 10203 | Colorectal Cancer | SPARCL1      | 0.000004 | -3.096174 |  |
| 10204 | Colorectal Cancer | CMAS         | 0.000711 | -3.085735 |  |
| 10205 | Colorectal Cancer | TFF3         | 0.004638 | -3.069182 |  |
| 10206 | Colorectal Cancer | SELENBP1     | 0.000071 | -3.066158 |  |
| 10207 | Colorectal Cancer | C2orf72      | 0.002451 | -3.066078 |  |
| 10208 | Colorectal Cancer | C4orf19      | 0.001296 | -3.063415 |  |
| 10209 | Colorectal Cancer | DARC         | 0.000001 | -3.028116 |  |
| 10210 | Colorectal Cancer | VIP          | 0.000001 | -3.019982 |  |
| 10211 | Colorectal Cancer | SR140        | 0.003805 | -3.019369 |  |
| 10212 | Colorectal Cancer | SCAPER       | 0.004247 | -3.017734 |  |
| 10213 | Colorectal Cancer | AKR1B10      | 0.000698 | -3.002267 |  |
| 10214 | Colorectal Cancer | LOC400573    | 0.001278 | -2.984874 |  |
| 10215 | Colorectal Cancer | ACACB        | 0.004517 | -2.983934 |  |
| 10216 | Colorectal Cancer | KIAA1468     | 0.000776 | -2.972723 |  |
| 10217 | Colorectal Cancer | DTWD1        | 0.004638 | -2.969544 |  |
| 10218 | Colorectal Cancer | FOXP1        | 0.000365 | -2.942729 |  |
| 10219 | Colorectal Cancer | MON2         | 0.000711 | -2.938999 |  |
| 10220 | Colorectal Cancer | FAM48A       | 0.002854 | -2.936586 |  |
| 10221 | Colorectal Cancer | VMD2L1       | 0.000134 | -2.885943 |  |
| 10222 | Colorectal Cancer | CEP70        | 0.001068 | -2.88124  |  |
| 10223 | Colorectal Cancer | CWF19L2      | 0.003589 | -2.85482  |  |
| 10224 | Colorectal Cancer | FGD4         | 0.000358 | -2.846781 |  |
| 10225 | Colorectal Cancer | C9orf125     | 0.000623 | -2.833038 |  |
| 10226 | Colorectal Cancer | RBM25        | 0.000802 | -2.822374 |  |
| 10227 | Colorectal Cancer | HSBP1L1      | 0.000488 | -2.82191  |  |
| 10228 | Colorectal Cancer | ABCC3        | 0.002833 | -2.821428 |  |
| 10229 | Colorectal Cancer | PPP2R3A      | 0.003288 | -2.821136 |  |
| 10230 | Colorectal Cancer | GPA33        | 0.000665 | -2.816748 |  |
| 10231 | Colorectal Cancer | RNASE4       | 0.000488 | -2.815054 |  |
| 10232 | Colorectal Cancer | PLCD1        | 0.004517 | -2.809502 |  |
| 10233 | Colorectal Cancer | SULT1A3      | 0.003634 | -2.807614 |  |
| 10234 | Colorectal Cancer | VWF          | 0.000708 | -2.797215 |  |
| 10235 | Colorectal Cancer | SAHH3        | 0.000006 | -2.796622 |  |
| 10236 | Colorectal Cancer | LYST         | 0.000207 | -2.788893 |  |
| 10237 | Colorectal Cancer | LOC100128893 | 0.004141 | -2.787412 |  |
| 10238 | Colorectal Cancer | TLE1         | 0.004773 | -2.779947 |  |
| 10239 | Colorectal Cancer | CPEB3        | 0.005131 | -2.761783 |  |
| 10240 | Colorectal Cancer | EXPH5        | 0.000446 | -2.756191 |  |
| 10241 | Colorectal Cancer | LOC100506168 | 0.003101 | -2.737855 |  |
| 10242 | Colorectal Cancer | TNFRSF10D    | 0.00281  | -2.734711 |  |
| 10243 | Colorectal Cancer | HSD11B2      | 0.000411 | -2.707869 |  |
| 10244 | Colorectal Cancer | SGSM3        | 0.002619 | -2.702811 |  |
| 10245 | Colorectal Cancer | LOC100506493 | 0.005131 | -2.692526 |  |
| 10246 | Colorectal Cancer | NHSL1        | 0.002223 | -2.69232  |  |
| 10247 | Colorectal Cancer | PCLO         | 0.003424 | -2.682969 |  |
| 10248 | Colorectal Cancer | LOC342918    | 0.031445 | -2.676083 |  |



|       |                   |          |          |           |  |
|-------|-------------------|----------|----------|-----------|--|
| 10249 | Colorectal Cancer | NEDD4L   | 0.00332  | -2.675522 |  |
| 10250 | Colorectal Cancer | TRUB1    | 0.016286 | -2.67491  |  |
| 10251 | Colorectal Cancer | TPT1     | 0.004857 | -2.663384 |  |
| 10252 | Colorectal Cancer | GPATCH2  | 0.003649 | -2.652061 |  |
| 10253 | Colorectal Cancer | SPON1    | 0.000432 | -2.646048 |  |
| 10254 | Colorectal Cancer | CCL13    | 0.000261 | -2.615183 |  |
| 10255 | Colorectal Cancer | C10orf54 | 0.003149 | -2.612426 |  |
| 10256 | Colorectal Cancer | CPA3     | 0        | -2.60624  |  |
| 10257 | Colorectal Cancer | NAPEPLD  | 0.001781 | -2.604727 |  |
| 10258 | Colorectal Cancer | SMCHD1   | 0.003343 | -2.585213 |  |
| 10259 | Colorectal Cancer | EPB41L4B | 0.000062 | -2.549991 |  |
| 10260 | Colorectal Cancer | ETFDH    | 0.003339 | -2.525804 |  |
| 10261 | Colorectal Cancer | PIGN     | 0.001057 | -2.524512 |  |
| 10262 | Colorectal Cancer | PALLD    | 0.000893 | -2.519625 |  |
| 10263 | Colorectal Cancer | CCDC112  | 0.001371 | -2.515317 |  |
| 10264 | Colorectal Cancer | ZSWIM6   | 0.003636 | -2.505999 |  |
| 10265 | Colorectal Cancer | CASD1    | 0.004245 | -2.501637 |  |
| 10266 | Colorectal Cancer | SDCBP2   | 0.000331 | -2.495947 |  |
| 10267 | Colorectal Cancer | FUBP1    | 0.000607 | -2.495646 |  |
| 10268 | Colorectal Cancer | RNASEL   | 0.004644 | -2.494672 |  |
| 10269 | Colorectal Cancer | MYOF     | 0.003778 | -2.488286 |  |
| 10270 | Colorectal Cancer | PLD1     | 0.0037   | -2.482875 |  |
| 10271 | Colorectal Cancer | AMY2B    | 0.004544 | -2.481498 |  |
| 10272 | Colorectal Cancer | FOXF2    | 0        | -2.48074  |  |
| 10273 | Colorectal Cancer | TMEM30B  | 0.000555 | -2.470234 |  |
| 10274 | Colorectal Cancer | SLCO2A1  | 0.000002 | -2.469144 |  |
| 10275 | Colorectal Cancer | CAMK2D   | 0.000541 | -2.468768 |  |
| 10276 | Colorectal Cancer | ACAD10   | 0.002237 | -2.454179 |  |
| 10277 | Colorectal Cancer | AP4B1    | 0.000582 | -2.447063 |  |
| 10278 | Colorectal Cancer | FOXF1    | 0        | -2.435512 |  |
| 10279 | Colorectal Cancer | CD74     | 0.037564 | -2.433393 |  |
| 10280 | Colorectal Cancer | MYO1C    | 0.003288 | -2.416458 |  |
| 10281 | Colorectal Cancer | RBBP4    | 0.004235 | -2.412335 |  |
| 10282 | Colorectal Cancer | GLTP     | 0.00293  | -2.401717 |  |
| 10283 | Colorectal Cancer | CRYZL1   | 0.004152 | -2.394317 |  |
| 10284 | Colorectal Cancer | SYTL4    | 0.001604 | -2.391109 |  |
| 10285 | Colorectal Cancer | KIAA1109 | 0.003038 | -2.378572 |  |
| 10286 | Colorectal Cancer | PGM5     | 0.000314 | -2.364494 |  |
| 10287 | Colorectal Cancer | WDR7     | 0.005167 | -2.346086 |  |
| 10288 | Colorectal Cancer | SCARA5   | 0.000025 | -2.332101 |  |
| 10289 | Colorectal Cancer | PAPSS2   | 0.004629 | -2.332038 |  |
| 10290 | Colorectal Cancer | FAM162A  | 0.00025  | -2.33122  |  |
| 10291 | Colorectal Cancer | CCDC14   | 0.00051  | -2.328058 |  |
| 10292 | Colorectal Cancer | HNF1B    | 0.003493 | -2.321626 |  |
| 10293 | Colorectal Cancer | RABGAP1L | 0.003737 | -2.314043 |  |
| 10294 | Colorectal Cancer | C15orf48 | 0.000105 | -2.264361 |  |
| 10295 | Colorectal Cancer | EFCAB4B  | 0.004437 | -2.264241 |  |
| 10296 | Colorectal Cancer | TSPAN13  | 0.002922 | -2.261416 |  |
| 10297 | Colorectal Cancer | AGXT2L2  | 0.00293  | -2.258722 |  |
| 10298 | Colorectal Cancer | MAB21L2  | 0.000009 | -2.254028 |  |

|       |                   |           |          |           |  |
|-------|-------------------|-----------|----------|-----------|--|
| 10299 | Colorectal Cancer | NKTR      | 0.002223 | -2.246367 |  |
| 10300 | Colorectal Cancer | MS4A8B    | 0.000135 | -2.245197 |  |
| 10301 | Colorectal Cancer | EYA3      | 0.046824 | -2.232375 |  |
| 10302 | Colorectal Cancer | TMEM43    | 0.004638 | -2.226105 |  |
| 10303 | Colorectal Cancer | RGMA      | 0.000001 | -2.216106 |  |
| 10304 | Colorectal Cancer | FAM161B   | 0.00488  | -2.207343 |  |
| 10305 | Colorectal Cancer | TMIGD     | 0.000335 | -2.196593 |  |
| 10306 | Colorectal Cancer | C8orf83   | 0.001854 | -2.182153 |  |
| 10307 | Colorectal Cancer | TCF21     | 0        | -2.173875 |  |
| 10308 | Colorectal Cancer | DNAJC4    | 0.002861 | -2.171379 |  |
| 10309 | Colorectal Cancer | ANKRD36   | 0.005131 | -2.167662 |  |
| 10310 | Colorectal Cancer | CTSG      | 0.000001 | -2.15913  |  |
| 10311 | Colorectal Cancer | TSPAN7    | 0.000705 | -2.148268 |  |
| 10312 | Colorectal Cancer | TMEM54    | 0.000211 | -2.141421 |  |
| 10313 | Colorectal Cancer | Q8NBX4    | 0.000102 | -2.127648 |  |
| 10314 | Colorectal Cancer | SDCCAG1   | 0.00091  | -2.126706 |  |
| 10315 | Colorectal Cancer | ZNF252    | 0.002619 | -2.12491  |  |
| 10316 | Colorectal Cancer | FAM200A   | 0.003763 | -2.122202 |  |
| 10317 | Colorectal Cancer | NSG1      | 0        | -2.121418 |  |
| 10318 | Colorectal Cancer | RHAG      | 0.046824 | -2.120604 |  |
| 10319 | Colorectal Cancer | PLAT      | 0.000028 | -2.107739 |  |
| 10320 | Colorectal Cancer | UNC5B     | 0.003512 | -2.103171 |  |
| 10321 | Colorectal Cancer | ACAA1     | 0.000802 | -2.099543 |  |
| 10322 | Colorectal Cancer | EPCAM     | 0.005086 | -2.095787 |  |
| 10323 | Colorectal Cancer | NEUROG3   | 0.000017 | -2.095584 |  |
| 10324 | Colorectal Cancer | LOC284454 | 0.004125 | -2.081457 |  |
| 10325 | Colorectal Cancer | ECHDC2    | 0.004558 | -2.078043 |  |
| 10326 | Colorectal Cancer | ADSV      | 0.000576 | -2.070961 |  |
| 10327 | Colorectal Cancer | CD79A     | 0.000427 | -2.069078 |  |
| 10328 | Colorectal Cancer | SYNJ2BP   | 0.000369 | -2.059174 |  |
| 10329 | Colorectal Cancer | TMSB10    | 0.000217 | -2.0569   |  |
| 10330 | Colorectal Cancer | VPS13D    | 0.003805 | -2.055066 |  |
| 10331 | Colorectal Cancer | PPP1R13B  | 0.004557 | -2.039713 |  |
| 10332 | Colorectal Cancer | GRIN1     | 0.001189 | -2.033231 |  |
| 10333 | Colorectal Cancer | MTHFD2L   | 0.004857 | -2.02129  |  |
| 10334 | Colorectal Cancer | MALL      | 0.00058  | -2.001755 |  |
| 10335 | Colorectal Cancer | CYP2R1    | 0.001404 | -2.000093 |  |
| 10336 | Colorectal Cancer | CBX3      | 0.000002 | 2.001406  |  |
| 10337 | Colorectal Cancer | ZMYND19   | 0        | 2.00155   |  |
| 10338 | Colorectal Cancer | LONP1     | 0        | 2.008715  |  |
| 10339 | Colorectal Cancer | RGS12     | 0        | 2.009921  |  |
| 10340 | Colorectal Cancer | MTA2      | 0.000001 | 2.010076  |  |
| 10341 | Colorectal Cancer | AAA1      | 0        | 2.01351   |  |
| 10342 | Colorectal Cancer | KIF15     | 0        | 2.015372  |  |
| 10343 | Colorectal Cancer | GOLT1B    | 0        | 2.015554  |  |
| 10344 | Colorectal Cancer | RIPK2     | 0        | 2.016821  |  |
| 10345 | Colorectal Cancer | MTERFD1   | 0.000001 | 2.018794  |  |
| 10346 | Colorectal Cancer | KIF11     | 0.000001 | 2.025286  |  |
| 10347 | Colorectal Cancer | NUP107    | 0        | 2.028406  |  |
| 10348 | Colorectal Cancer | CCDC59    | 0        | 2.030633  |  |

|       |                   |           |          |          |  |
|-------|-------------------|-----------|----------|----------|--|
| 10349 | Colorectal Cancer | PSD2      | 0        | 2.036907 |  |
| 10350 | Colorectal Cancer | TIMELESS  | 0        | 2.051896 |  |
| 10351 | Colorectal Cancer | PHF11     | 0.001695 | 2.062975 |  |
| 10352 | Colorectal Cancer | TMEM91    | 0        | 2.063926 |  |
| 10353 | Colorectal Cancer | OIP5      | 0.000001 | 2.065998 |  |
| 10354 | Colorectal Cancer | KDM2B     | 0.004141 | 2.06911  |  |
| 10355 | Colorectal Cancer | RUVBL1    | 0        | 2.069813 |  |
| 10356 | Colorectal Cancer | NUP205    | 0.000001 | 2.074642 |  |
| 10357 | Colorectal Cancer | STT3A     | 0        | 2.077468 |  |
| 10358 | Colorectal Cancer | ENO1      | 0.000002 | 2.078688 |  |
| 10359 | Colorectal Cancer | RUVBL2    | 0        | 2.080554 |  |
| 10360 | Colorectal Cancer | ADCK4     | 0        | 2.081367 |  |
| 10361 | Colorectal Cancer | QPCTL     | 0        | 2.085368 |  |
| 10362 | Colorectal Cancer | BPI       | 0        | 2.085919 |  |
| 10363 | Colorectal Cancer | RFC5      | 0.000001 | 2.096438 |  |
| 10364 | Colorectal Cancer | EPPK1     | 0.000001 | 2.101393 |  |
| 10365 | Colorectal Cancer | L3MBTL2   | 0        | 2.106203 |  |
| 10366 | Colorectal Cancer | C20orf132 | 0        | 2.106547 |  |
| 10367 | Colorectal Cancer | PSMA1     | 0.004439 | 2.107412 |  |
| 10368 | Colorectal Cancer | SLC25A32  | 0.000001 | 2.113102 |  |
| 10369 | Colorectal Cancer | GIN52     | 0.000001 | 2.11675  |  |
| 10370 | Colorectal Cancer | NUP85     | 0.000001 | 2.11777  |  |
| 10371 | Colorectal Cancer | C1orf107  | 0.002301 | 2.118563 |  |
| 10372 | Colorectal Cancer | RBM28     | 0        | 2.120363 |  |
| 10373 | Colorectal Cancer | COL18A1   | 0        | 2.120507 |  |
| 10374 | Colorectal Cancer | NCAPG2    | 0        | 2.125408 |  |
| 10375 | Colorectal Cancer | FCHSD1    | 0        | 2.126384 |  |
| 10376 | Colorectal Cancer | CAD       | 0.000001 | 2.127343 |  |
| 10377 | Colorectal Cancer | C22orf29  | 0        | 2.132896 |  |
| 10378 | Colorectal Cancer | GTF2IRD1  | 0        | 2.133547 |  |
| 10379 | Colorectal Cancer | FANCL     | 0        | 2.139324 |  |
| 10380 | Colorectal Cancer | GZMB      | 0        | 2.14732  |  |
| 10381 | Colorectal Cancer | KIF2C     | 0.000001 | 2.154208 |  |
| 10382 | Colorectal Cancer | OAS3      | 0.000001 | 2.155018 |  |
| 10383 | Colorectal Cancer | TIE1      | 0        | 2.16211  |  |
| 10384 | Colorectal Cancer | PORCN     | 0        | 2.162538 |  |
| 10385 | Colorectal Cancer | ANO3      | 0        | 2.166345 |  |
| 10386 | Colorectal Cancer | FANCG     | 0        | 2.166676 |  |
| 10387 | Colorectal Cancer | CCL4      | 0        | 2.174968 |  |
| 10388 | Colorectal Cancer | PDZD2     | 0        | 2.185247 |  |
| 10389 | Colorectal Cancer | PCBP3     | 0        | 2.186495 |  |
| 10390 | Colorectal Cancer | CPSF4     | 0.000711 | 2.187018 |  |
| 10391 | Colorectal Cancer | SLC38A3   | 0        | 2.187399 |  |
| 10392 | Colorectal Cancer | RAB15     | 0        | 2.188293 |  |
| 10393 | Colorectal Cancer | JAG2      | 0.000001 | 2.191192 |  |
| 10394 | Colorectal Cancer | WDR43     | 0.000001 | 2.194866 |  |
| 10395 | Colorectal Cancer | C10orf71  | 0        | 2.194946 |  |
| 10396 | Colorectal Cancer | CSNK2B    | 0.000285 | 2.197823 |  |
| 10397 | Colorectal Cancer | OLR1      | 0.000557 | 2.207088 |  |
| 10398 | Colorectal Cancer | GTPBP5    | 0        | 2.213754 |  |

|       |                   |          |          |          |  |
|-------|-------------------|----------|----------|----------|--|
| 10399 | Colorectal Cancer | ARIH1    | 0.000605 | 2.21698  |  |
| 10400 | Colorectal Cancer | HOXB6    | 0.022575 | 2.220702 |  |
| 10401 | Colorectal Cancer | CLCN7    | 0        | 2.234566 |  |
| 10402 | Colorectal Cancer | KIF19    | 0        | 2.251696 |  |
| 10403 | Colorectal Cancer | POLR1D   | 0.000001 | 2.252838 |  |
| 10404 | Colorectal Cancer | PTCD1    | 0        | 2.255095 |  |
| 10405 | Colorectal Cancer | KIAA1430 | 0.004953 | 2.262002 |  |
| 10406 | Colorectal Cancer | NUP37    | 0.000001 | 2.262069 |  |
| 10407 | Colorectal Cancer | FUT8     | 0        | 2.267452 |  |
| 10408 | Colorectal Cancer | PITX1    | 0.000001 | 2.26755  |  |
| 10409 | Colorectal Cancer | CHD7     | 0.000445 | 2.281194 |  |
| 10410 | Colorectal Cancer | CBX4     | 0        | 2.293435 |  |
| 10411 | Colorectal Cancer | KIF20A   | 0        | 2.295043 |  |
| 10412 | Colorectal Cancer | TMEM109  | 0        | 2.298206 |  |
| 10413 | Colorectal Cancer | SLC26A4  | 0        | 2.301524 |  |
| 10414 | Colorectal Cancer | MYO1H    | 0        | 2.304578 |  |
| 10415 | Colorectal Cancer | MICB     | 0        | 2.307009 |  |
| 10416 | Colorectal Cancer | BHLHE22  | 0        | 2.322857 |  |
| 10417 | Colorectal Cancer | HS2ST1   | 0.000002 | 2.328743 |  |
| 10418 | Colorectal Cancer | CECR2    | 0        | 2.332804 |  |
| 10419 | Colorectal Cancer | CBFB     | 0        | 2.334836 |  |
| 10420 | Colorectal Cancer | CDC42EP1 | 0.000001 | 2.339437 |  |
| 10421 | Colorectal Cancer | SORD     | 0.000001 | 2.341712 |  |
| 10422 | Colorectal Cancer | POLN     | 0        | 2.353199 |  |
| 10423 | Colorectal Cancer | USH2A    | 0        | 2.355116 |  |
| 10424 | Colorectal Cancer | NRK      | 0        | 2.357796 |  |
| 10425 | Colorectal Cancer | DOK1     | 0        | 2.368591 |  |
| 10426 | Colorectal Cancer | AMPD2    | 0        | 2.370905 |  |
| 10427 | Colorectal Cancer | COL24A1  | 0        | 2.375741 |  |
| 10428 | Colorectal Cancer | HEATR4   | 0        | 2.383003 |  |
| 10429 | Colorectal Cancer | MRPS17   | 0.000001 | 2.391333 |  |
| 10430 | Colorectal Cancer | KIF9     | 0        | 2.398162 |  |
| 10431 | Colorectal Cancer | LY6G6D   | 0        | 2.400382 |  |
| 10432 | Colorectal Cancer | NOP56    | 0.000001 | 2.40229  |  |
| 10433 | Colorectal Cancer | ZWILCH   | 0        | 2.403617 |  |
| 10434 | Colorectal Cancer | CDH26    | 0        | 2.404148 |  |
| 10435 | Colorectal Cancer | JAKMIP2  | 0        | 2.406255 |  |
| 10436 | Colorectal Cancer | CBS      | 0.000703 | 2.411396 |  |
| 10437 | Colorectal Cancer | AOC2     | 0        | 2.41181  |  |
| 10438 | Colorectal Cancer | ITGAM    | 0        | 2.411873 |  |
| 10439 | Colorectal Cancer | ILF3     | 0.00296  | 2.417933 |  |
| 10440 | Colorectal Cancer | RFX4     | 0        | 2.420886 |  |
| 10441 | Colorectal Cancer | ARNTL2   | 0        | 2.425129 |  |
| 10442 | Colorectal Cancer | ADFP     | 0.00024  | 2.429958 |  |
| 10443 | Colorectal Cancer | ANGPTL4  | 0.000173 | 2.440066 |  |
| 10444 | Colorectal Cancer | ADAMTSL2 | 0.000012 | 2.453786 |  |
| 10445 | Colorectal Cancer | PSAT1    | 0.000001 | 2.45864  |  |
| 10446 | Colorectal Cancer | NFE2L3   | 0        | 2.463088 |  |
| 10447 | Colorectal Cancer | CSE1L    | 0.000001 | 2.467005 |  |
| 10448 | Colorectal Cancer | MAK      | 0        | 2.472108 |  |

|       |                   |          |          |          |  |
|-------|-------------------|----------|----------|----------|--|
| 10449 | Colorectal Cancer | EYA1     | 0        | 2.472297 |  |
| 10450 | Colorectal Cancer | ANKFN1   | 0        | 2.472601 |  |
| 10451 | Colorectal Cancer | C12orf11 | 0        | 2.477935 |  |
| 10452 | Colorectal Cancer | KRT39    | 0        | 2.480666 |  |
| 10453 | Colorectal Cancer | CARD11   | 0        | 2.480952 |  |
| 10454 | Colorectal Cancer | PRDM8    | 0        | 2.481532 |  |
| 10455 | Colorectal Cancer | PKD1L3   | 0        | 2.481772 |  |
| 10456 | Colorectal Cancer | CA6      | 0        | 2.484544 |  |
| 10457 | Colorectal Cancer | VAR5     | 0        | 2.490948 |  |
| 10458 | Colorectal Cancer | ICAM1    | 0        | 2.498583 |  |
| 10459 | Colorectal Cancer | IQCH     | 0        | 2.516142 |  |
| 10460 | Colorectal Cancer | CYP1B1   | 0.000314 | 2.525663 |  |
| 10461 | Colorectal Cancer | CCDC92   | 0.00358  | 2.52573  |  |
| 10462 | Colorectal Cancer | PLD6     | 0.000062 | 2.530931 |  |
| 10463 | Colorectal Cancer | NPHP1    | 0        | 2.545304 |  |
| 10464 | Colorectal Cancer | CEP250   | 0        | 2.550342 |  |
| 10465 | Colorectal Cancer | RAPGEF4  | 0        | 2.551132 |  |
| 10466 | Colorectal Cancer | BCL6B    | 0        | 2.554916 |  |
| 10467 | Colorectal Cancer | DCC      | 0        | 2.558436 |  |
| 10468 | Colorectal Cancer | NALCN    | 0        | 2.560201 |  |
| 10469 | Colorectal Cancer | MCM7     | 0        | 2.562626 |  |
| 10470 | Colorectal Cancer | PSMB8    | 0.004857 | 2.5672   |  |
| 10471 | Colorectal Cancer | UBE2L6   | 0.000001 | 2.570384 |  |
| 10472 | Colorectal Cancer | TTC25    | 0        | 2.571125 |  |
| 10473 | Colorectal Cancer | PSMG1    | 0.000001 | 2.572526 |  |
| 10474 | Colorectal Cancer | TMEM14A  | 0.00296  | 2.575291 |  |
| 10475 | Colorectal Cancer | CDC6     | 0        | 2.585624 |  |
| 10476 | Colorectal Cancer | AHCY     | 0.000002 | 2.587594 |  |
| 10477 | Colorectal Cancer | ABCA13   | 0        | 2.590263 |  |
| 10478 | Colorectal Cancer | CCBL1    | 0        | 2.59711  |  |
| 10479 | Colorectal Cancer | CASS4    | 0        | 2.601324 |  |
| 10480 | Colorectal Cancer | PSAP     | 0.002393 | 2.610683 |  |
| 10481 | Colorectal Cancer | CTNBL1   | 0        | 2.612824 |  |
| 10482 | Colorectal Cancer | NPVF     | 0        | 2.613849 |  |
| 10483 | Colorectal Cancer | LIN7A    | 0        | 2.628195 |  |
| 10484 | Colorectal Cancer | FAM176A  | 0        | 2.634253 |  |
| 10485 | Colorectal Cancer | MMP13    | 0        | 2.64178  |  |
| 10486 | Colorectal Cancer | FBXL13   | 0        | 2.642704 |  |
| 10487 | Colorectal Cancer | FGD5     | 0        | 2.646435 |  |
| 10488 | Colorectal Cancer | WDR31    | 0        | 2.648876 |  |
| 10489 | Colorectal Cancer | TMEM161A | 0        | 2.649004 |  |
| 10490 | Colorectal Cancer | CCNA2    | 0.000001 | 2.6516   |  |
| 10491 | Colorectal Cancer | PPM1F    | 0.001854 | 2.653937 |  |
| 10492 | Colorectal Cancer | EIF3B    | 0.001493 | 2.65534  |  |
| 10493 | Colorectal Cancer | RHBDF1   | 0.000215 | 2.662688 |  |
| 10494 | Colorectal Cancer | ALDH4A1  | 0.000232 | 2.672146 |  |
| 10495 | Colorectal Cancer | NEB      | 0        | 2.673266 |  |
| 10496 | Colorectal Cancer | ZNF474   | 0        | 2.681025 |  |
| 10497 | Colorectal Cancer | MSLN     | 0        | 2.690638 |  |
| 10498 | Colorectal Cancer | BOP1     | 0        | 2.693284 |  |

|       |                   |           |          |          |  |
|-------|-------------------|-----------|----------|----------|--|
| 10499 | Colorectal Cancer | AP1S2     | 0.003236 | 2.693499 |  |
| 10500 | Colorectal Cancer | CGNL1     | 0.000004 | 2.694607 |  |
| 10501 | Colorectal Cancer | GBP1      | 0        | 2.698104 |  |
| 10502 | Colorectal Cancer | CDC25B    | 0.000001 | 2.70041  |  |
| 10503 | Colorectal Cancer | EIF2AK2   | 0.004176 | 2.716897 |  |
| 10504 | Colorectal Cancer | STAU1     | 0.004644 | 2.717209 |  |
| 10505 | Colorectal Cancer | RFC3      | 0        | 2.720527 |  |
| 10506 | Colorectal Cancer | XKRX      | 0        | 2.73967  |  |
| 10507 | Colorectal Cancer | EIF5A     | 0        | 2.754041 |  |
| 10508 | Colorectal Cancer | NPC1L1    | 0        | 2.754101 |  |
| 10509 | Colorectal Cancer | FEN1      | 0.000001 | 2.754245 |  |
| 10510 | Colorectal Cancer | LOC647979 | 0.004217 | 2.755327 |  |
| 10511 | Colorectal Cancer | PTPRU     | 0        | 2.768652 |  |
| 10512 | Colorectal Cancer | ABCC2     | 0        | 2.78484  |  |
| 10513 | Colorectal Cancer | NCOA3     | 0.003805 | 2.809919 |  |
| 10514 | Colorectal Cancer | CAMSAP1L1 | 0.002817 | 2.822373 |  |
| 10515 | Colorectal Cancer | CLNK      | 0        | 2.822808 |  |
| 10516 | Colorectal Cancer | ADAMTS3   | 0        | 2.824047 |  |
| 10517 | Colorectal Cancer | TEAD4     | 0.000001 | 2.833619 |  |
| 10518 | Colorectal Cancer | LGR5      | 0.000001 | 2.855969 |  |
| 10519 | Colorectal Cancer | LMNB2     | 0        | 2.858719 |  |
| 10520 | Colorectal Cancer | NT5DC2    | 0        | 2.876001 |  |
| 10521 | Colorectal Cancer | EFNA3     | 0        | 2.90539  |  |
| 10522 | Colorectal Cancer | HNRNPL    | 0        | 2.905758 |  |
| 10523 | Colorectal Cancer | DYX1C1    | 0        | 2.918594 |  |
| 10524 | Colorectal Cancer | NNMT      | 0.000273 | 2.93126  |  |
| 10525 | Colorectal Cancer | C11orf45  | 0        | 2.931764 |  |
| 10526 | Colorectal Cancer | SLC7A5    | 0.000001 | 2.932664 |  |
| 10527 | Colorectal Cancer | CFI       | 0.000174 | 2.93439  |  |
| 10528 | Colorectal Cancer | MED25     | 0.000405 | 2.953415 |  |
| 10529 | Colorectal Cancer | C4orf39   | 0        | 2.956402 |  |
| 10530 | Colorectal Cancer | GPX1      | 0.000488 | 2.957755 |  |
| 10531 | Colorectal Cancer | INHBE     | 0.000642 | 2.971835 |  |
| 10532 | Colorectal Cancer | SHMT2     | 0        | 2.982462 |  |
| 10533 | Colorectal Cancer | C10orf10  | 0.000005 | 2.992878 |  |
| 10534 | Colorectal Cancer | MAEL      | 0        | 2.996037 |  |
| 10535 | Colorectal Cancer | PPP4R4    | 0        | 2.999379 |  |
| 10536 | Colorectal Cancer | MACC1     | 0.003549 | 3.024789 |  |
| 10537 | Colorectal Cancer | KIF4A     | 0.000001 | 3.052197 |  |
| 10538 | Colorectal Cancer | GINS1     | 0        | 3.07162  |  |
| 10539 | Colorectal Cancer | F12       | 0        | 3.082553 |  |
| 10540 | Colorectal Cancer | EDAR      | 0        | 3.098888 |  |
| 10541 | Colorectal Cancer | STAT1     | 0        | 3.107809 |  |
| 10542 | Colorectal Cancer | LCA5      | 0        | 3.115799 |  |
| 10543 | Colorectal Cancer | TRIP13    | 0        | 3.129853 |  |
| 10544 | Colorectal Cancer | RNF219    | 0.000471 | 3.147289 |  |
| 10545 | Colorectal Cancer | STK31     | 0        | 3.147914 |  |
| 10546 | Colorectal Cancer | F5        | 0.00014  | 3.231423 |  |
| 10547 | Colorectal Cancer | CA9       | 0        | 3.241118 |  |
| 10548 | Colorectal Cancer | NUTF2     | 0        | 3.241433 |  |

|       |                   |          |          |          |  |
|-------|-------------------|----------|----------|----------|--|
| 10549 | Colorectal Cancer | CEP55    | 0        | 3.248565 |  |
| 10550 | Colorectal Cancer | MMP14    | 0        | 3.249611 |  |
| 10551 | Colorectal Cancer | SOD2     | 0        | 3.254564 |  |
| 10552 | Colorectal Cancer | FOXM1    | 0        | 3.25519  |  |
| 10553 | Colorectal Cancer | GRAMD1B  | 0        | 3.261789 |  |
| 10554 | Colorectal Cancer | PIWIL1   | 0        | 3.34161  |  |
| 10555 | Colorectal Cancer | CERKL    | 0        | 3.342308 |  |
| 10556 | Colorectal Cancer | CDH2     | 0        | 3.362404 |  |
| 10557 | Colorectal Cancer | BMP7     | 0        | 3.38987  |  |
| 10558 | Colorectal Cancer | MCM4     | 0        | 3.415645 |  |
| 10559 | Colorectal Cancer | TACSTD2  | 0        | 3.446898 |  |
| 10560 | Colorectal Cancer | MIF      | 0.000001 | 3.504093 |  |
| 10561 | Colorectal Cancer | GPSM2    | 0.000018 | 3.562648 |  |
| 10562 | Colorectal Cancer | IFIT5    | 0.002833 | 3.586507 |  |
| 10563 | Colorectal Cancer | VNN1     | 0.000533 | 3.670827 |  |
| 10564 | Colorectal Cancer | PBK      | 0.000001 | 3.714962 |  |
| 10565 | Colorectal Cancer | SIM2     | 0        | 3.727166 |  |
| 10566 | Colorectal Cancer | NKD1     | 0        | 3.731564 |  |
| 10567 | Colorectal Cancer | KLK6     | 0        | 3.733988 |  |
| 10568 | Colorectal Cancer | ECT2     | 0        | 3.796085 |  |
| 10569 | Colorectal Cancer | APOE     | 0        | 3.797515 |  |
| 10570 | Colorectal Cancer | TMPRSS3  | 0        | 3.798986 |  |
| 10571 | Colorectal Cancer | MMP11    | 0        | 3.817899 |  |
| 10572 | Colorectal Cancer | TMEM97   | 0        | 3.826889 |  |
| 10573 | Colorectal Cancer | KCNJ15   | 0        | 3.837106 |  |
| 10574 | Colorectal Cancer | B3GALTL  | 0.049356 | 3.840546 |  |
| 10575 | Colorectal Cancer | AQP9     | 0.000053 | 3.849158 |  |
| 10576 | Colorectal Cancer | HSD11B1  | 0.000121 | 3.932743 |  |
| 10577 | Colorectal Cancer | PMAIP1   | 0        | 4.0525   |  |
| 10578 | Colorectal Cancer | CLDN2    | 0        | 4.07628  |  |
| 10579 | Colorectal Cancer | CXCL9    | 0        | 4.116745 |  |
| 10580 | Colorectal Cancer | IL24     | 0        | 4.120371 |  |
| 10581 | Colorectal Cancer | FTL      | 0.003014 | 4.124829 |  |
| 10582 | Colorectal Cancer | IFITM1   | 0        | 4.28338  |  |
| 10583 | Colorectal Cancer | ASGR2    | 0.000553 | 4.302714 |  |
| 10584 | Colorectal Cancer | SERPINA5 | 0.000352 | 4.345646 |  |
| 10585 | Colorectal Cancer | SRPX2    | 0        | 4.507537 |  |
| 10586 | Colorectal Cancer | CD81     | 0.00447  | 4.590045 |  |
| 10587 | Colorectal Cancer | OLFML2B  | 0        | 4.638492 |  |
| 10588 | Colorectal Cancer | SULT2A1  | 0.000605 | 4.720173 |  |
| 10589 | Colorectal Cancer | FMO3     | 0.000071 | 4.720673 |  |
| 10590 | Colorectal Cancer | SERPINF2 | 0.00067  | 4.841546 |  |
| 10591 | Colorectal Cancer | CXCL10   | 0        | 4.8737   |  |
| 10592 | Colorectal Cancer | SLCO1B3  | 0        | 5.007902 |  |
| 10593 | Colorectal Cancer | DACH1    | 0.001964 | 5.017765 |  |
| 10594 | Colorectal Cancer | CXCL1    | 0        | 5.226033 |  |
| 10595 | Colorectal Cancer | COLEC11  | 0        | 5.278582 |  |
| 10596 | Colorectal Cancer | COL1A2   | 0        | 5.292898 |  |
| 10597 | Colorectal Cancer | CP       | 0.00038  | 5.509002 |  |
| 10598 | Colorectal Cancer | CPB2     | 0.000432 | 5.613978 |  |

|       |                   |          |          |           |  |
|-------|-------------------|----------|----------|-----------|--|
| 10599 | Colorectal Cancer | C3       | 0.000006 | 5.668511  |  |
| 10600 | Colorectal Cancer | SLC13A5  | 0.000331 | 6.076943  |  |
| 10601 | Colorectal Cancer | C8A      | 0.000531 | 6.120991  |  |
| 10602 | Colorectal Cancer | SRSF6    | 0.000001 | 6.156758  |  |
| 10603 | Colorectal Cancer | DSC3     | 0        | 6.40146   |  |
| 10604 | Colorectal Cancer | MMP12    | 0        | 6.617377  |  |
| 10605 | Colorectal Cancer | RBP4     | 0.000557 | 6.658636  |  |
| 10606 | Colorectal Cancer | ASGR1    | 0.000048 | 6.679332  |  |
| 10607 | Colorectal Cancer | C5       | 0.00011  | 6.687382  |  |
| 10608 | Colorectal Cancer | APOH     | 0.000429 | 6.75181   |  |
| 10609 | Colorectal Cancer | FCN3     | 0.000009 | 6.844049  |  |
| 10610 | Colorectal Cancer | APOC2    | 0.000051 | 6.904064  |  |
| 10611 | Colorectal Cancer | AGXT     | 0.000773 | 6.935567  |  |
| 10612 | Colorectal Cancer | HPD      | 0.000531 | 7.014538  |  |
| 10613 | Colorectal Cancer | C6       | 0.00046  | 7.054535  |  |
| 10614 | Colorectal Cancer | SAA4     | 0.000529 | 7.065     |  |
| 10615 | Colorectal Cancer | CXCL3    | 0        | 7.233392  |  |
| 10616 | Colorectal Cancer | PLG      | 0.000498 | 7.361402  |  |
| 10617 | Colorectal Cancer | ITIH1    | 0.000337 | 7.554118  |  |
| 10618 | Colorectal Cancer | ZAK      | 0.000658 | 7.747274  |  |
| 10619 | Colorectal Cancer | C4BPA    | 0.000535 | 7.948833  |  |
| 10620 | Colorectal Cancer | APOC1    | 0.000001 | 8.000367  |  |
| 10621 | Colorectal Cancer | TTR      | 0.000676 | 8.109081  |  |
| 10622 | Colorectal Cancer | CYP2C8   | 0.000673 | 8.207707  |  |
| 10623 | Colorectal Cancer | DSG3     | 0        | 8.93798   |  |
| 10624 | Colorectal Cancer | LBP      | 0.000127 | 8.984359  |  |
| 10625 | Colorectal Cancer | HAMP     | 0.000059 | 9.033264  |  |
| 10626 | Colorectal Cancer | IL1A     | 0        | 9.050041  |  |
| 10627 | Colorectal Cancer | TCN1     | 0        | 9.094781  |  |
| 10628 | Colorectal Cancer | KRT23    | 0        | 9.22809   |  |
| 10629 | Colorectal Cancer | APCS     | 0.000082 | 9.596353  |  |
| 10630 | Colorectal Cancer | KNG1     | 0.000331 | 10.388199 |  |
| 10631 | Colorectal Cancer | HRG      | 0.000312 | 11.044669 |  |
| 10632 | Colorectal Cancer | SERPINC1 | 0.000285 | 11.791284 |  |
| 10633 | Colorectal Cancer | SERPINA3 | 0.000001 | 11.942192 |  |
| 10634 | Colorectal Cancer | APOB     | 0.000088 | 13.0809   |  |
| 10635 | Colorectal Cancer | AHSG     | 0.000112 | 13.371622 |  |
| 10636 | Colorectal Cancer | APOC3    | 0.000181 | 13.701454 |  |
| 10637 | Colorectal Cancer | HPX      | 0.000192 | 14.287143 |  |
| 10638 | Colorectal Cancer | FGG      | 0.000014 | 14.651355 |  |
| 10639 | Colorectal Cancer | F2       | 0.000047 | 15.443368 |  |
| 10640 | Colorectal Cancer | VTN      | 0.000044 | 15.844447 |  |
| 10641 | Colorectal Cancer | ORM2     | 0.00009  | 16.094898 |  |
| 10642 | Colorectal Cancer | CYP2E1   | 0.000072 | 16.227626 |  |
| 10643 | Colorectal Cancer | FGL1     | 0.000039 | 18.32827  |  |
| 10644 | Colorectal Cancer | TF       | 0.000068 | 18.608249 |  |
| 10645 | Colorectal Cancer | GC       | 0.000013 | 20.947027 |  |
| 10646 | Colorectal Cancer | AMBP     | 0.000021 | 21.099729 |  |
| 10647 | Colorectal Cancer | APOA2    | 0.000023 | 21.365529 |  |
| 10648 | Colorectal Cancer | HP       | 0.000009 | 21.852969 |  |



|       |                      |          |          |            |  |
|-------|----------------------|----------|----------|------------|--|
| 10649 | Colorectal Cancer    | ALB      | 0.000007 | 23.019959  |  |
| 10650 | Colorectal Cancer    | APOA1    | 0.000018 | 23.169381  |  |
| 10651 | Colorectal Cancer    | FGB      | 0.000008 | 23.984148  |  |
| 10652 | Colorectal Cancer    | FGA      | 0.000008 | 25.158992  |  |
| 10653 | Colorectal Cancer    | CRP      | 0.000002 | 25.311911  |  |
| 10654 | Colorectal Cancer    | ORM1     | 0.000008 | 25.514711  |  |
| 10655 | Colorectal Neoplasms | GCG      | 0        | -26.920825 |  |
| 10656 | Colorectal Neoplasms | CLCA1    | 0        | -13.979504 |  |
| 10657 | Colorectal Neoplasms | MYH11    | 0.000001 | -12.464317 |  |
| 10658 | Colorectal Neoplasms | SLC26A2  | 0        | -11.558375 |  |
| 10659 | Colorectal Neoplasms | ADAMDEC1 | 0        | -10.152414 |  |
| 10660 | Colorectal Neoplasms | KLF4     | 0        | -5.50973   |  |
| 10661 | Colorectal Neoplasms | ABCA8    | 0        | -5.466247  |  |
| 10662 | Colorectal Neoplasms | LRRC19   | 0        | -5.381388  |  |
| 10663 | Colorectal Neoplasms | PADI2    | 0        | -5.278838  |  |
| 10664 | Colorectal Neoplasms | FLJ21511 | 0        | -4.96684   |  |
| 10665 | Colorectal Neoplasms | F13A1    | 0        | -4.717275  |  |
| 10666 | Colorectal Neoplasms | HSD11B2  | 0        | -4.642659  |  |
| 10667 | Colorectal Neoplasms | REP15    | 0        | -4.575296  |  |
| 10668 | Colorectal Neoplasms | SPARCL1  | 0        | -4.431656  |  |
| 10669 | Colorectal Neoplasms | ITM2C    | 0        | -4.229678  |  |
| 10670 | Colorectal Neoplasms | FRZB     | 0        | -4.185366  |  |
| 10671 | Colorectal Neoplasms | CKB      | 0        | -4.185161  |  |
| 10672 | Colorectal Neoplasms | DSCR1L1  | 0        | -4.065147  |  |
| 10673 | Colorectal Neoplasms | JARID1D  | 0        | -3.998035  |  |
| 10674 | Colorectal Neoplasms | DST      | 0        | -3.84509   |  |
| 10675 | Colorectal Neoplasms | MEP1A    | 0        | -3.653428  |  |
| 10676 | Colorectal Neoplasms | KRT20    | 0        | -3.617039  |  |
| 10677 | Colorectal Neoplasms | NSMAF    | 0        | -3.490679  |  |
| 10678 | Colorectal Neoplasms | TNFRSF17 | 0        | -3.482547  |  |
| 10679 | Colorectal Neoplasms | CHL1     | 0        | -3.44257   |  |
| 10680 | Colorectal Neoplasms | CD47     | 0        | -3.425163  |  |
| 10681 | Colorectal Neoplasms | B3GALT5  | 0        | -3.421405  |  |
| 10682 | Colorectal Neoplasms | LGALS4   | 0        | -3.375029  |  |
| 10683 | Colorectal Neoplasms | FTH1     | 0        | -3.343445  |  |
| 10684 | Colorectal Neoplasms | MGLL     | 0        | -3.330854  |  |
| 10685 | Colorectal Neoplasms | SLC9A2   | 0        | -3.285396  |  |
| 10686 | Colorectal Neoplasms | KLRB1    | 0        | -3.231369  |  |
| 10687 | Colorectal Neoplasms | ATP8B1   | 0        | -3.228551  |  |
| 10688 | Colorectal Neoplasms | CCDC18   | 0        | -3.194796  |  |
| 10689 | Colorectal Neoplasms | PTGER4   | 0        | -3.176752  |  |
| 10690 | Colorectal Neoplasms | GCNT3    | 0        | -3.173418  |  |
| 10691 | Colorectal Neoplasms | FBLN1    | 0        | -3.123876  |  |
| 10692 | Colorectal Neoplasms | DPT      | 0        | -3.027548  |  |
| 10693 | Colorectal Neoplasms | CPA3     | 0        | -2.996718  |  |
| 10694 | Colorectal Neoplasms | SSPN     | 0        | -2.996206  |  |
| 10695 | Colorectal Neoplasms | SCNN1B   | 0        | -2.974333  |  |
| 10696 | Colorectal Neoplasms | PRIC285  | 0        | -2.887749  |  |
| 10697 | Colorectal Neoplasms | GSN      | 0        | -2.854124  |  |
| 10698 | Colorectal Neoplasms | FGL2     | 0        | -2.817655  |  |

|       |                      |            |          |           |  |
|-------|----------------------|------------|----------|-----------|--|
| 10699 | Colorectal Neoplasms | ETHE1      | 0        | -2.789342 |  |
| 10700 | Colorectal Neoplasms | LGALS2     | 0        | -2.769808 |  |
| 10701 | Colorectal Neoplasms | STMN2      | 0        | -2.750087 |  |
| 10702 | Colorectal Neoplasms | ENDOD1     | 0        | -2.748799 |  |
| 10703 | Colorectal Neoplasms | KIT        | 0        | -2.722354 |  |
| 10704 | Colorectal Neoplasms | SRI        | 0        | -2.719712 |  |
| 10705 | Colorectal Neoplasms | PDGFRA     | 0        | -2.653227 |  |
| 10706 | Colorectal Neoplasms | TTRAP      | 0        | -2.65296  |  |
| 10707 | Colorectal Neoplasms | ASAH1      | 0        | -2.645352 |  |
| 10708 | Colorectal Neoplasms | SPIB       | 0        | -2.629843 |  |
| 10709 | Colorectal Neoplasms | MAOA       | 0        | -2.629701 |  |
| 10710 | Colorectal Neoplasms | AOC3       | 0        | -2.617512 |  |
| 10711 | Colorectal Neoplasms | NR3C2      | 0        | -2.616894 |  |
| 10712 | Colorectal Neoplasms | ENTPD5     | 0        | -2.582646 |  |
| 10713 | Colorectal Neoplasms | MALL       | 0        | -2.526251 |  |
| 10714 | Colorectal Neoplasms | CMAH       | 0        | -2.481824 |  |
| 10715 | Colorectal Neoplasms | LMNA       | 0        | -2.46552  |  |
| 10716 | Colorectal Neoplasms | AKAP9      | 0        | -2.41686  |  |
| 10717 | Colorectal Neoplasms | CAPN5      | 0        | -2.323863 |  |
| 10718 | Colorectal Neoplasms | CCL23      | 0        | -2.282087 |  |
| 10719 | Colorectal Neoplasms | FRYL       | 0        | -2.255563 |  |
| 10720 | Colorectal Neoplasms | ENTPD3     | 0        | -2.224412 |  |
| 10721 | Colorectal Neoplasms | ST7L       | 0        | -2.223282 |  |
| 10722 | Colorectal Neoplasms | VSIG2      | 0        | -2.221568 |  |
| 10723 | Colorectal Neoplasms | BHLHB3     | 0        | -2.202249 |  |
| 10724 | Colorectal Neoplasms | LOC285016  | 0        | -2.201143 |  |
| 10725 | Colorectal Neoplasms | LPAR1      | 0        | -2.101231 |  |
| 10726 | Colorectal Neoplasms | FAS        | 0        | -2.09611  |  |
| 10727 | Colorectal Neoplasms | SLC22A18AS | 0        | -2.068933 |  |
| 10728 | Colorectal Neoplasms | PYY2       | 0        | -2.037223 |  |
| 10729 | Colorectal Neoplasms | PAG1       | 0        | -2.033606 |  |
| 10730 | Colorectal Neoplasms | TSPAN3     | 0        | -2.021741 |  |
| 10731 | Colorectal Neoplasms | HERPUD1    | 0        | -2.008187 |  |
| 10732 | Colorectal Neoplasms | CBX3       | 0.000002 | 2.001406  |  |
| 10733 | Colorectal Neoplasms | LONP1      | 0        | 2.008715  |  |
| 10734 | Colorectal Neoplasms | MTA2       | 0.000001 | 2.010076  |  |
| 10735 | Colorectal Neoplasms | KIF15      | 0        | 2.015372  |  |
| 10736 | Colorectal Neoplasms | GOLT1B     | 0        | 2.015554  |  |
| 10737 | Colorectal Neoplasms | RIPK2      | 0        | 2.016821  |  |
| 10738 | Colorectal Neoplasms | MTERFD1    | 0.000001 | 2.018794  |  |
| 10739 | Colorectal Neoplasms | KIF11      | 0.000001 | 2.025286  |  |
| 10740 | Colorectal Neoplasms | NUP107     | 0        | 2.028406  |  |
| 10741 | Colorectal Neoplasms | CCDC59     | 0        | 2.030633  |  |
| 10742 | Colorectal Neoplasms | SET        | 0        | 2.042096  |  |
| 10743 | Colorectal Neoplasms | TIMELESS   | 0        | 2.051896  |  |
| 10744 | Colorectal Neoplasms | OIP5       | 0.000001 | 2.065998  |  |
| 10745 | Colorectal Neoplasms | RUVBL1     | 0        | 2.069813  |  |
| 10746 | Colorectal Neoplasms | NUP205     | 0.000001 | 2.074642  |  |
| 10747 | Colorectal Neoplasms | STT3A      | 0        | 2.077468  |  |
| 10748 | Colorectal Neoplasms | ENO1       | 0.000002 | 2.078688  |  |

|       |                      |          |          |          |  |
|-------|----------------------|----------|----------|----------|--|
| 10749 | Colorectal Neoplasms | RUVBL2   | 0        | 2.080554 |  |
| 10750 | Colorectal Neoplasms | RFC5     | 0.000001 | 2.096438 |  |
| 10751 | Colorectal Neoplasms | EPPK1    | 0.000001 | 2.101393 |  |
| 10752 | Colorectal Neoplasms | SLC25A32 | 0.000001 | 2.113102 |  |
| 10753 | Colorectal Neoplasms | GINS2    | 0.000001 | 2.11675  |  |
| 10754 | Colorectal Neoplasms | NUP85    | 0.000001 | 2.11777  |  |
| 10755 | Colorectal Neoplasms | RBM28    | 0        | 2.120363 |  |
| 10756 | Colorectal Neoplasms | NCAPG2   | 0        | 2.125408 |  |
| 10757 | Colorectal Neoplasms | CAD      | 0.000001 | 2.127343 |  |
| 10758 | Colorectal Neoplasms | GTF2IRD1 | 0        | 2.133547 |  |
| 10759 | Colorectal Neoplasms | FANCL    | 0        | 2.139324 |  |
| 10760 | Colorectal Neoplasms | GZMB     | 0        | 2.14732  |  |
| 10761 | Colorectal Neoplasms | KIF2C    | 0.000001 | 2.154208 |  |
| 10762 | Colorectal Neoplasms | OAS3     | 0.000001 | 2.155018 |  |
| 10763 | Colorectal Neoplasms | FANCG    | 0        | 2.166676 |  |
| 10764 | Colorectal Neoplasms | CCL4     | 0        | 2.174968 |  |
| 10765 | Colorectal Neoplasms | RAB15    | 0        | 2.188293 |  |
| 10766 | Colorectal Neoplasms | JAG2     | 0.000001 | 2.191192 |  |
| 10767 | Colorectal Neoplasms | WDR43    | 0.000001 | 2.194866 |  |
| 10768 | Colorectal Neoplasms | POLR1D   | 0.000001 | 2.252838 |  |
| 10769 | Colorectal Neoplasms | NUP37    | 0.000001 | 2.262069 |  |
| 10770 | Colorectal Neoplasms | FUT8     | 0        | 2.267452 |  |
| 10771 | Colorectal Neoplasms | PITX1    | 0.000001 | 2.26755  |  |
| 10772 | Colorectal Neoplasms | KIF20A   | 0        | 2.295043 |  |
| 10773 | Colorectal Neoplasms | MICB     | 0        | 2.307009 |  |
| 10774 | Colorectal Neoplasms | COL11A1  | 0        | 2.322616 |  |
| 10775 | Colorectal Neoplasms | HS2ST1   | 0.000002 | 2.328743 |  |
| 10776 | Colorectal Neoplasms | CBFB     | 0        | 2.334836 |  |
| 10777 | Colorectal Neoplasms | CDC42EP1 | 0.000001 | 2.339437 |  |
| 10778 | Colorectal Neoplasms | SORD     | 0.000001 | 2.341712 |  |
| 10779 | Colorectal Neoplasms | MRPS17   | 0.000001 | 2.391333 |  |
| 10780 | Colorectal Neoplasms | NOP56    | 0.000001 | 2.40229  |  |
| 10781 | Colorectal Neoplasms | ZWILCH   | 0        | 2.403617 |  |
| 10782 | Colorectal Neoplasms | ARNTL2   | 0        | 2.425129 |  |
| 10783 | Colorectal Neoplasms | COL1A2   | 0        | 2.433157 |  |
| 10784 | Colorectal Neoplasms | PSAT1    | 0.000001 | 2.45864  |  |
| 10785 | Colorectal Neoplasms | NFE2L3   | 0        | 2.463088 |  |
| 10786 | Colorectal Neoplasms | CSE1L    | 0.000001 | 2.467005 |  |
| 10787 | Colorectal Neoplasms | C12orf11 | 0        | 2.477935 |  |
| 10788 | Colorectal Neoplasms | VAR5     | 0        | 2.490948 |  |
| 10789 | Colorectal Neoplasms | ICAM1    | 0        | 2.498583 |  |
| 10790 | Colorectal Neoplasms | FAP      | 0        | 2.53712  |  |
| 10791 | Colorectal Neoplasms | MCM7     | 0        | 2.562626 |  |
| 10792 | Colorectal Neoplasms | UBE2L6   | 0.000001 | 2.570384 |  |
| 10793 | Colorectal Neoplasms | PSMG1    | 0.000001 | 2.572526 |  |
| 10794 | Colorectal Neoplasms | CDC6     | 0        | 2.585624 |  |
| 10795 | Colorectal Neoplasms | AHCY     | 0.000002 | 2.587594 |  |
| 10796 | Colorectal Neoplasms | COL10A1  | 0        | 2.650829 |  |
| 10797 | Colorectal Neoplasms | CCNA2    | 0.000001 | 2.6516   |  |
| 10798 | Colorectal Neoplasms | BOP1     | 0        | 2.693284 |  |

|       |                      |          |          |           |  |
|-------|----------------------|----------|----------|-----------|--|
| 10799 | Colorectal Neoplasms | GBP1     | 0        | 2.698104  |  |
| 10800 | Colorectal Neoplasms | CDC25B   | 0.000001 | 2.70041   |  |
| 10801 | Colorectal Neoplasms | C7orf68  | 0.000001 | 2.713761  |  |
| 10802 | Colorectal Neoplasms | RFC3     | 0        | 2.720527  |  |
| 10803 | Colorectal Neoplasms | EIF5A    | 0        | 2.754041  |  |
| 10804 | Colorectal Neoplasms | FEN1     | 0.000001 | 2.754245  |  |
| 10805 | Colorectal Neoplasms | TEAD4    | 0.000001 | 2.833619  |  |
| 10806 | Colorectal Neoplasms | LGR5     | 0.000001 | 2.855969  |  |
| 10807 | Colorectal Neoplasms | LMNB2    | 0        | 2.858719  |  |
| 10808 | Colorectal Neoplasms | NT5DC2   | 0        | 2.876001  |  |
| 10809 | Colorectal Neoplasms | HNRNPL   | 0        | 2.905758  |  |
| 10810 | Colorectal Neoplasms | SLC7A5   | 0.000001 | 2.932664  |  |
| 10811 | Colorectal Neoplasms | SHMT2    | 0        | 2.982462  |  |
| 10812 | Colorectal Neoplasms | THBS2    | 0        | 2.987513  |  |
| 10813 | Colorectal Neoplasms | KIF4A    | 0.000001 | 3.052197  |  |
| 10814 | Colorectal Neoplasms | GINS1    | 0        | 3.07162   |  |
| 10815 | Colorectal Neoplasms | F12      | 0        | 3.082553  |  |
| 10816 | Colorectal Neoplasms | STAT1    | 0        | 3.107809  |  |
| 10817 | Colorectal Neoplasms | TRIP13   | 0        | 3.129853  |  |
| 10818 | Colorectal Neoplasms | NUTF2    | 0        | 3.241433  |  |
| 10819 | Colorectal Neoplasms | CEP55    | 0        | 3.248565  |  |
| 10820 | Colorectal Neoplasms | SOD2     | 0        | 3.254564  |  |
| 10821 | Colorectal Neoplasms | FOXMI    | 0        | 3.25519   |  |
| 10822 | Colorectal Neoplasms | MCM4     | 0        | 3.415645  |  |
| 10823 | Colorectal Neoplasms | TACSTD2  | 0        | 3.446898  |  |
| 10824 | Colorectal Neoplasms | MIF      | 0.000001 | 3.504093  |  |
| 10825 | Colorectal Neoplasms | PBK      | 0.000001 | 3.714962  |  |
| 10826 | Colorectal Neoplasms | ECT2     | 0        | 3.796085  |  |
| 10827 | Colorectal Neoplasms | TMEM97   | 0        | 3.826889  |  |
| 10828 | Colorectal Neoplasms | B3GALTL  | 0.049356 | 3.840546  |  |
| 10829 | Colorectal Neoplasms | PMAIP1   | 0        | 4.0525    |  |
| 10830 | Colorectal Neoplasms | CXCL9    | 0        | 4.116745  |  |
| 10831 | Colorectal Neoplasms | AGT      | 0        | 4.16549   |  |
| 10832 | Colorectal Neoplasms | CFB      | 0        | 4.493717  |  |
| 10833 | Colorectal Neoplasms | CXCL10   | 0        | 4.8737    |  |
| 10834 | Colorectal Neoplasms | SRSF6    | 0.000001 | 6.156758  |  |
| 10835 | Colorectal Neoplasms | MMP12    | 0        | 6.617377  |  |
| 10836 | Colorectal Neoplasms | CXCL3    | 0        | 7.233392  |  |
| 10837 | Colorectal Neoplasms | SPP1     | 0        | 7.465531  |  |
| 10838 | Constipation         | KLK10    | 0.032298 | -2.616816 |  |
| 10839 | Constipation         | ALDH3B2  | 0.036643 | -2.046938 |  |
| 10840 | CXCR4 Receptors      | ATP6V0A4 | 0        | -5.585106 |  |
| 10841 | CXCR4 Receptors      | BTG1     | 0        | -4.77867  |  |
| 10842 | CXCR4 Receptors      | DPYSL3   | 0        | -4.290677 |  |
| 10843 | CXCR4 Receptors      | ARL4     | 0        | -3.689439 |  |
| 10844 | CXCR4 Receptors      | HBG2     | 0        | -3.305153 |  |
| 10845 | CXCR4 Receptors      | MGST1    | 0        | -3.166764 |  |
| 10846 | CXCR4 Receptors      | MIB2     | 0        | -2.94675  |  |
| 10847 | CXCR4 Receptors      | MYT1     | 0        | -2.83628  |  |
| 10848 | CXCR4 Receptors      | FSTL3    | 0        | -2.83047  |  |

|       |                 |           |   |           |  |
|-------|-----------------|-----------|---|-----------|--|
| 10849 | CXCR4 Receptors | FGF3      | 0 | -2.760704 |  |
| 10850 | CXCR4 Receptors | MFAP2     | 0 | -2.703116 |  |
| 10851 | CXCR4 Receptors | CORO1A    | 0 | -2.530584 |  |
| 10852 | CXCR4 Receptors | TPRXL     | 0 | -2.441202 |  |
| 10853 | CXCR4 Receptors | PHLDA1    | 0 | -2.412442 |  |
| 10854 | CXCR4 Receptors | WDR72     | 0 | -2.407779 |  |
| 10855 | CXCR4 Receptors | ITM2C     | 0 | -2.390478 |  |
| 10856 | CXCR4 Receptors | PALLD     | 0 | -2.361907 |  |
| 10857 | CXCR4 Receptors | ABLIM2    | 0 | -2.341479 |  |
| 10858 | CXCR4 Receptors | CLEC11A   | 0 | -2.301792 |  |
| 10859 | CXCR4 Receptors | TXNDC12   | 0 | -2.241355 |  |
| 10860 | CXCR4 Receptors | ABCD1     | 0 | -2.204834 |  |
| 10861 | CXCR4 Receptors | PPARG     | 0 | -2.200591 |  |
| 10862 | CXCR4 Receptors | KCNH2     | 0 | -2.200463 |  |
| 10863 | CXCR4 Receptors | ATP1A1    | 0 | -2.152291 |  |
| 10864 | CXCR4 Receptors | KRT8      | 0 | -2.147206 |  |
| 10865 | CXCR4 Receptors | NAT12     | 0 | -2.121314 |  |
| 10866 | CXCR4 Receptors | FGFRL1    | 0 | -2.001723 |  |
| 10867 | CXCR4 Receptors | WDR71     | 0 | 2.007033  |  |
| 10868 | CXCR4 Receptors | LOC285989 | 0 | 2.036076  |  |
| 10869 | CXCR4 Receptors | GAMT      | 0 | 2.041534  |  |
| 10870 | CXCR4 Receptors | CD99L2    | 0 | 2.073986  |  |
| 10871 | CXCR4 Receptors | ARNT2     | 0 | 2.090516  |  |
| 10872 | CXCR4 Receptors | CDS1      | 0 | 2.110718  |  |
| 10873 | CXCR4 Receptors | C18orf17  | 0 | 2.110862  |  |
| 10874 | CXCR4 Receptors | UGT1A3    | 0 | 2.117134  |  |
| 10875 | CXCR4 Receptors | AP1S2     | 0 | 2.141072  |  |
| 10876 | CXCR4 Receptors | FLJ20647  | 0 | 2.149431  |  |
| 10877 | CXCR4 Receptors | ASB4      | 0 | 2.159825  |  |
| 10878 | CXCR4 Receptors | PDHA1     | 0 | 2.171695  |  |
| 10879 | CXCR4 Receptors | MAPK9     | 0 | 2.176151  |  |
| 10880 | CXCR4 Receptors | MIA       | 0 | 2.188193  |  |
| 10881 | CXCR4 Receptors | LRIG1     | 0 | 2.194723  |  |
| 10882 | CXCR4 Receptors | EPHB4     | 0 | 2.197242  |  |
| 10883 | CXCR4 Receptors | DDAH1     | 0 | 2.220748  |  |
| 10884 | CXCR4 Receptors | FUCA1     | 0 | 2.238861  |  |
| 10885 | CXCR4 Receptors | RBP7      | 0 | 2.244218  |  |
| 10886 | CXCR4 Receptors | IGFBP2    | 0 | 2.246886  |  |
| 10887 | CXCR4 Receptors | CXYorf3   | 0 | 2.316379  |  |
| 10888 | CXCR4 Receptors | CRIM1     | 0 | 2.32511   |  |
| 10889 | CXCR4 Receptors | ARMC10    | 0 | 2.340054  |  |
| 10890 | CXCR4 Receptors | TMEM60    | 0 | 2.347597  |  |
| 10891 | CXCR4 Receptors | RAB9A     | 0 | 2.353768  |  |
| 10892 | CXCR4 Receptors | MSI2      | 0 | 2.357038  |  |
| 10893 | CXCR4 Receptors | SLC27A2   | 0 | 2.368735  |  |
| 10894 | CXCR4 Receptors | MAOA      | 0 | 2.374199  |  |
| 10895 | CXCR4 Receptors | CTPS2     | 0 | 2.408193  |  |
| 10896 | CXCR4 Receptors | CYBRD1    | 0 | 2.419522  |  |
| 10897 | CXCR4 Receptors | BCAS4     | 0 | 2.485147  |  |
| 10898 | CXCR4 Receptors | TUBB2B    | 0 | 2.490356  |  |

|       |                            |             |   |            |  |
|-------|----------------------------|-------------|---|------------|--|
| 10899 | CXCR4 Receptors            | MID2        | 0 | 2.521398   |  |
| 10900 | CXCR4 Receptors            | EDARADD     | 0 | 2.537187   |  |
| 10901 | CXCR4 Receptors            | COPS6       | 0 | 2.667141   |  |
| 10902 | CXCR4 Receptors            | GYG2        | 0 | 2.668019   |  |
| 10903 | CXCR4 Receptors            | SCD5        | 0 | 2.672064   |  |
| 10904 | CXCR4 Receptors            | IFITM2      | 0 | 2.713718   |  |
| 10905 | CXCR4 Receptors            | MRPS6       | 0 | 2.713819   |  |
| 10906 | CXCR4 Receptors            | NUAK1       | 0 | 2.719478   |  |
| 10907 | CXCR4 Receptors            | FLJ20489    | 0 | 2.72879    |  |
| 10908 | CXCR4 Receptors            | DUS4L       | 0 | 2.753515   |  |
| 10909 | CXCR4 Receptors            | ROR2        | 0 | 2.869131   |  |
| 10910 | CXCR4 Receptors            | BCAP29      | 0 | 2.933524   |  |
| 10911 | CXCR4 Receptors            | MGC22793    | 0 | 2.957372   |  |
| 10912 | CXCR4 Receptors            | CNKSR3      | 0 | 3.035668   |  |
| 10913 | CXCR4 Receptors            | FAIM3       | 0 | 3.054141   |  |
| 10914 | CXCR4 Receptors            | BMP7        | 0 | 3.078688   |  |
| 10915 | CXCR4 Receptors            | 4-Sep       | 0 | 3.135722   |  |
| 10916 | CXCR4 Receptors            | PCSK1N      | 0 | 3.227366   |  |
| 10917 | CXCR4 Receptors            | IDS         | 0 | 3.259512   |  |
| 10918 | CXCR4 Receptors            | FLJ14213    | 0 | 3.370477   |  |
| 10919 | CXCR4 Receptors            | MARCKS      | 0 | 3.388638   |  |
| 10920 | CXCR4 Receptors            | HPGD        | 0 | 3.415895   |  |
| 10921 | CXCR4 Receptors            | MSX1        | 0 | 3.456937   |  |
| 10922 | CXCR4 Receptors            | MCOLN2      | 0 | 3.546994   |  |
| 10923 | CXCR4 Receptors            | GTPBP6      | 0 | 3.926675   |  |
| 10924 | CXCR4 Receptors            | CD99        | 0 | 4.141912   |  |
| 10925 | CXCR4 Receptors            | ENC1        | 0 | 4.237816   |  |
| 10926 | CXCR4 Receptors            | SYK         | 0 | 4.271278   |  |
| 10927 | CXCR4 Receptors            | C1orf178    | 0 | 4.311505   |  |
| 10928 | CXCR4 Receptors            | SLC1A3      | 0 | 4.363429   |  |
| 10929 | CXCR4 Receptors            | KIF1A       | 0 | 4.453252   |  |
| 10930 | CXCR4 Receptors            | AXL         | 0 | 4.584111   |  |
| 10931 | CXCR4 Receptors            | NPC2        | 0 | 4.716078   |  |
| 10932 | CXCR4 Receptors            | CXCL16      | 0 | 4.768333   |  |
| 10933 | CXCR4 Receptors            | NCALD       | 0 | 5.058307   |  |
| 10934 | CXCR4 Receptors            | LTB4DH      | 0 | 6.60835    |  |
| 10935 | CXCR4 Receptors            | TGFBI       | 0 | 7.416049   |  |
| 10936 | CXCR4 Receptors            | IRX3        | 0 | 7.50161    |  |
| 10937 | CXCR4 Receptors            | ID2         | 0 | 8.349183   |  |
| 10938 | CXCR4 Receptors            | TMEM98      | 0 | 9.656715   |  |
| 10939 | Cystadenocarcinoma, Serous | S100P       | 0 | -82.154941 |  |
| 10940 | Cystadenocarcinoma, Serous | REG1B       | 0 | -70.857102 |  |
| 10941 | Cystadenocarcinoma, Serous | GPX2        | 0 | -69.45286  |  |
| 10942 | Cystadenocarcinoma, Serous | CEACAM6     | 0 | -56.828195 |  |
| 10943 | Cystadenocarcinoma, Serous | CCL14-CCL15 | 0 | -54.92139  |  |
| 10944 | Cystadenocarcinoma, Serous | REG1A       | 0 | -52.321797 |  |
| 10945 | Cystadenocarcinoma, Serous | NOX1        | 0 | -44.954576 |  |
| 10946 | Cystadenocarcinoma, Serous | REG4        | 0 | -37.815357 |  |
| 10947 | Cystadenocarcinoma, Serous | REG3A       | 0 | -34.754038 |  |
| 10948 | Cystadenocarcinoma, Serous | SPINK1      | 0 | -33.962536 |  |

|       |                            |            |   |            |  |
|-------|----------------------------|------------|---|------------|--|
| 10949 | Cystadenocarcinoma, Serous | TFF1       | 0 | -33.69438  |  |
| 10950 | Cystadenocarcinoma, Serous | OLFM4      | 0 | -33.365508 |  |
| 10951 | Cystadenocarcinoma, Serous | MMP3       | 0 | -31.898754 |  |
| 10952 | Cystadenocarcinoma, Serous | TFF3       | 0 | -27.989672 |  |
| 10953 | Cystadenocarcinoma, Serous | CDX2       | 0 | -27.541242 |  |
| 10954 | Cystadenocarcinoma, Serous | CEACAM5    | 0 | -27.4734   |  |
| 10955 | Cystadenocarcinoma, Serous | RNF128     | 0 | -24.735046 |  |
| 10956 | Cystadenocarcinoma, Serous | CLRN3      | 0 | -24.087738 |  |
| 10957 | Cystadenocarcinoma, Serous | DUOX2      | 0 | -23.706224 |  |
| 10958 | Cystadenocarcinoma, Serous | DPEP1      | 0 | -22.948238 |  |
| 10959 | Cystadenocarcinoma, Serous | VIL1       | 0 | -22.752675 |  |
| 10960 | Cystadenocarcinoma, Serous | TDGF1      | 0 | -22.484115 |  |
| 10961 | Cystadenocarcinoma, Serous | CDX1       | 0 | -22.432702 |  |
| 10962 | Cystadenocarcinoma, Serous | MUC12      | 0 | -22.333287 |  |
| 10963 | Cystadenocarcinoma, Serous | CDH17      | 0 | -20.334856 |  |
| 10964 | Cystadenocarcinoma, Serous | SPINK4     | 0 | -20.057011 |  |
| 10965 | Cystadenocarcinoma, Serous | CCL20      | 0 | -19.659908 |  |
| 10966 | Cystadenocarcinoma, Serous | ZG16       | 0 | -19.622259 |  |
| 10967 | Cystadenocarcinoma, Serous | ASCL2      | 0 | -18.789439 |  |
| 10968 | Cystadenocarcinoma, Serous | NCRNA00261 | 0 | -18.728798 |  |
| 10969 | Cystadenocarcinoma, Serous | MUC3B      | 0 | -18.430544 |  |
| 10970 | Cystadenocarcinoma, Serous | CYP2B6     | 0 | -18.418425 |  |
| 10971 | Cystadenocarcinoma, Serous | NR1I2      | 0 | -18.259394 |  |
| 10972 | Cystadenocarcinoma, Serous | C10orf99   | 0 | -17.438821 |  |
| 10973 | Cystadenocarcinoma, Serous | DEFA5      | 0 | -17.406271 |  |
| 10974 | Cystadenocarcinoma, Serous | LGALS4     | 0 | -17.382549 |  |
| 10975 | Cystadenocarcinoma, Serous | FERMT1     | 0 | -16.645031 |  |
| 10976 | Cystadenocarcinoma, Serous | EPS8L3     | 0 | -16.501052 |  |
| 10977 | Cystadenocarcinoma, Serous | AREG       | 0 | -16.424613 |  |
| 10978 | Cystadenocarcinoma, Serous | HNF4A      | 0 | -16.093492 |  |
| 10979 | Cystadenocarcinoma, Serous | MUC13      | 0 | -16.045853 |  |
| 10980 | Cystadenocarcinoma, Serous | TRIM15     | 0 | -15.932123 |  |
| 10981 | Cystadenocarcinoma, Serous | COL17A1    | 0 | -15.589913 |  |
| 10982 | Cystadenocarcinoma, Serous | MUC2       | 0 | -15.363161 |  |
| 10983 | Cystadenocarcinoma, Serous | GUCY2C     | 0 | -14.853224 |  |
| 10984 | Cystadenocarcinoma, Serous | TOX3       | 0 | -14.777092 |  |
| 10985 | Cystadenocarcinoma, Serous | POF1B      | 0 | -14.571769 |  |
| 10986 | Cystadenocarcinoma, Serous | DSG3       | 0 | -14.530676 |  |
| 10987 | Cystadenocarcinoma, Serous | MS4A12     | 0 | -14.085907 |  |
| 10988 | Cystadenocarcinoma, Serous | FABP1      | 0 | -13.894196 |  |
| 10989 | Cystadenocarcinoma, Serous | RETNLB     | 0 | -13.782077 |  |
| 10990 | Cystadenocarcinoma, Serous | DMBT1      | 0 | -13.352612 |  |
| 10991 | Cystadenocarcinoma, Serous | DDC        | 0 | -13.169677 |  |
| 10992 | Cystadenocarcinoma, Serous | TRIM31     | 0 | -13.133129 |  |
| 10993 | Cystadenocarcinoma, Serous | ATP10B     | 0 | -13.072314 |  |
| 10994 | Cystadenocarcinoma, Serous | TFF2       | 0 | -12.99526  |  |
| 10995 | Cystadenocarcinoma, Serous | USH1C      | 0 | -12.525619 |  |
| 10996 | Cystadenocarcinoma, Serous | C4BPB      | 0 | -12.509657 |  |
| 10997 | Cystadenocarcinoma, Serous | CEACAM1    | 0 | -12.46148  |  |
| 10998 | Cystadenocarcinoma, Serous | LEFTY1     | 0 | -12.422975 |  |

|       |                            |              |          |            |  |
|-------|----------------------------|--------------|----------|------------|--|
| 10999 | Cystadenocarcinoma, Serous | FUT6         | 0        | -12.192326 |  |
| 11000 | Cystadenocarcinoma, Serous | PLA2G2A      | 0        | -12.160032 |  |
| 11001 | Cystadenocarcinoma, Serous | SLC39A5      | 0        | -11.982667 |  |
| 11002 | Cystadenocarcinoma, Serous | PPARG        | 0        | -11.629432 |  |
| 11003 | Cystadenocarcinoma, Serous | TSPAN8       | 0.000001 | -11.589339 |  |
| 11004 | Cystadenocarcinoma, Serous | ARL14        | 0        | -11.524536 |  |
| 11005 | Cystadenocarcinoma, Serous | LY6G6D       | 0        | -11.369396 |  |
| 11006 | Cystadenocarcinoma, Serous | GPA33        | 0        | -11.225798 |  |
| 11007 | Cystadenocarcinoma, Serous | EREG         | 0        | -10.567779 |  |
| 11008 | Cystadenocarcinoma, Serous | WNK4         | 0        | -10.504423 |  |
| 11009 | Cystadenocarcinoma, Serous | PRSS3        | 0        | -10.250363 |  |
| 11010 | Cystadenocarcinoma, Serous | CELP         | 0        | -10.197448 |  |
| 11011 | Cystadenocarcinoma, Serous | C2CD4A       | 0        | -10.087429 |  |
| 11012 | Cystadenocarcinoma, Serous | AKR1C3       | 0        | -10.035394 |  |
| 11013 | Cystadenocarcinoma, Serous | AGR2         | 0        | -10.021181 |  |
| 11014 | Cystadenocarcinoma, Serous | SERPINB5     | 0        | -9.884888  |  |
| 11015 | Cystadenocarcinoma, Serous | MUC17        | 0        | -9.614083  |  |
| 11016 | Cystadenocarcinoma, Serous | IL8          | 0        | -9.604294  |  |
| 11017 | Cystadenocarcinoma, Serous | SDR16C5      | 0        | -9.597397  |  |
| 11018 | Cystadenocarcinoma, Serous | ACSL5        | 0        | -9.545692  |  |
| 11019 | Cystadenocarcinoma, Serous | IYD          | 0        | -9.50085   |  |
| 11020 | Cystadenocarcinoma, Serous | CDA          | 0        | -9.435744  |  |
| 11021 | Cystadenocarcinoma, Serous | C2orf89      | 0        | -9.125418  |  |
| 11022 | Cystadenocarcinoma, Serous | MMP12        | 0        | -8.861331  |  |
| 11023 | Cystadenocarcinoma, Serous | LOC283859    | 0        | -8.620237  |  |
| 11024 | Cystadenocarcinoma, Serous | C17orf73     | 0        | -8.61921   |  |
| 11025 | Cystadenocarcinoma, Serous | CFTR         | 0        | -8.61752   |  |
| 11026 | Cystadenocarcinoma, Serous | UGT1A1       | 0        | -8.597117  |  |
| 11027 | Cystadenocarcinoma, Serous | ACE2         | 0        | -8.548223  |  |
| 11028 | Cystadenocarcinoma, Serous | CEL          | 0        | -8.459869  |  |
| 11029 | Cystadenocarcinoma, Serous | FOXA2        | 0        | -8.315197  |  |
| 11030 | Cystadenocarcinoma, Serous | TCN1         | 0        | -8.297113  |  |
| 11031 | Cystadenocarcinoma, Serous | C13orf18     | 0        | -8.222109  |  |
| 11032 | Cystadenocarcinoma, Serous | ETS2         | 0        | -8.020716  |  |
| 11033 | Cystadenocarcinoma, Serous | FGFR4        | 0        | -8.014647  |  |
| 11034 | Cystadenocarcinoma, Serous | PRAP1        | 0        | -7.870295  |  |
| 11035 | Cystadenocarcinoma, Serous | LRRC19       | 0        | -7.83463   |  |
| 11036 | Cystadenocarcinoma, Serous | RAPGEFL1     | 0        | -7.820147  |  |
| 11037 | Cystadenocarcinoma, Serous | ARSE         | 0        | -7.7546    |  |
| 11038 | Cystadenocarcinoma, Serous | CDCA7        | 0        | -7.739772  |  |
| 11039 | Cystadenocarcinoma, Serous | TMED6        | 0        | -7.707651  |  |
| 11040 | Cystadenocarcinoma, Serous | MMP1         | 0        | -7.694799  |  |
| 11041 | Cystadenocarcinoma, Serous | IHH          | 0        | -7.687852  |  |
| 11042 | Cystadenocarcinoma, Serous | ITGA2        | 0        | -7.686786  |  |
| 11043 | Cystadenocarcinoma, Serous | SLCO1B3      | 0        | -7.669545  |  |
| 11044 | Cystadenocarcinoma, Serous | FUT4         | 0        | -7.668576  |  |
| 11045 | Cystadenocarcinoma, Serous | ABCC2        | 0        | -7.641195  |  |
| 11046 | Cystadenocarcinoma, Serous | LOC100288092 | 0        | -7.52454   |  |
| 11047 | Cystadenocarcinoma, Serous | CTSE         | 0        | -7.505301  |  |
| 11048 | Cystadenocarcinoma, Serous | CA1          | 0        | -7.331237  |  |



|       |                            |              |   |           |  |
|-------|----------------------------|--------------|---|-----------|--|
| 11049 | Cystadenocarcinoma, Serous | PLCB4        | 0 | -7.325962 |  |
| 11050 | Cystadenocarcinoma, Serous | TFPI         | 0 | -7.29702  |  |
| 11051 | Cystadenocarcinoma, Serous | BCL2L15      | 0 | -7.283747 |  |
| 11052 | Cystadenocarcinoma, Serous | SLC25A15     | 0 | -7.20281  |  |
| 11053 | Cystadenocarcinoma, Serous | GIPC2        | 0 | -7.001278 |  |
| 11054 | Cystadenocarcinoma, Serous | PLS1         | 0 | -6.972854 |  |
| 11055 | Cystadenocarcinoma, Serous | CDHR5        | 0 | -6.933833 |  |
| 11056 | Cystadenocarcinoma, Serous | TMEM37       | 0 | -6.905502 |  |
| 11057 | Cystadenocarcinoma, Serous | GPR109B      | 0 | -6.894752 |  |
| 11058 | Cystadenocarcinoma, Serous | CCL18        | 0 | -6.84854  |  |
| 11059 | Cystadenocarcinoma, Serous | GPR120       | 0 | -6.801171 |  |
| 11060 | Cystadenocarcinoma, Serous | UGT2A3       | 0 | -6.76391  |  |
| 11061 | Cystadenocarcinoma, Serous | BAIAP2L2     | 0 | -6.716377 |  |
| 11062 | Cystadenocarcinoma, Serous | FAM3D        | 0 | -6.713634 |  |
| 11063 | Cystadenocarcinoma, Serous | HEPACAM2     | 0 | -6.674208 |  |
| 11064 | Cystadenocarcinoma, Serous | PARM1        | 0 | -6.580271 |  |
| 11065 | Cystadenocarcinoma, Serous | HNF4G        | 0 | -6.505807 |  |
| 11066 | Cystadenocarcinoma, Serous | PIP5K1B      | 0 | -6.480194 |  |
| 11067 | Cystadenocarcinoma, Serous | SLC12A2      | 0 | -6.471073 |  |
| 11068 | Cystadenocarcinoma, Serous | CALML4       | 0 | -6.443105 |  |
| 11069 | Cystadenocarcinoma, Serous | BCL2L14      | 0 | -6.401529 |  |
| 11070 | Cystadenocarcinoma, Serous | MYO7B        | 0 | -6.377428 |  |
| 11071 | Cystadenocarcinoma, Serous | C19orf77     | 0 | -6.357863 |  |
| 11072 | Cystadenocarcinoma, Serous | XPNPEP2      | 0 | -6.276759 |  |
| 11073 | Cystadenocarcinoma, Serous | SATB2        | 0 | -6.275615 |  |
| 11074 | Cystadenocarcinoma, Serous | C1orf125     | 0 | -6.244888 |  |
| 11075 | Cystadenocarcinoma, Serous | PROX1        | 0 | -6.189935 |  |
| 11076 | Cystadenocarcinoma, Serous | UGT8         | 0 | -6.189233 |  |
| 11077 | Cystadenocarcinoma, Serous | NQO1         | 0 | -6.143242 |  |
| 11078 | Cystadenocarcinoma, Serous | FXYD3        | 0 | -6.076999 |  |
| 11079 | Cystadenocarcinoma, Serous | GMDS         | 0 | -6.065593 |  |
| 11080 | Cystadenocarcinoma, Serous | FOXA3        | 0 | -6.009293 |  |
| 11081 | Cystadenocarcinoma, Serous | FABP6        | 0 | -5.886784 |  |
| 11082 | Cystadenocarcinoma, Serous | LRP4         | 0 | -5.803077 |  |
| 11083 | Cystadenocarcinoma, Serous | SLC5A9       | 0 | -5.801662 |  |
| 11084 | Cystadenocarcinoma, Serous | XK           | 0 | -5.784991 |  |
| 11085 | Cystadenocarcinoma, Serous | SLC6A14      | 0 | -5.745974 |  |
| 11086 | Cystadenocarcinoma, Serous | CENPV        | 0 | -5.718385 |  |
| 11087 | Cystadenocarcinoma, Serous | ADCYAP1      | 0 | -5.713573 |  |
| 11088 | Cystadenocarcinoma, Serous | FAM84A       | 0 | -5.670863 |  |
| 11089 | Cystadenocarcinoma, Serous | ITPKA        | 0 | -5.662952 |  |
| 11090 | Cystadenocarcinoma, Serous | IL1A         | 0 | -5.605946 |  |
| 11091 | Cystadenocarcinoma, Serous | PTPRO        | 0 | -5.590431 |  |
| 11092 | Cystadenocarcinoma, Serous | SLCO4A1      | 0 | -5.56316  |  |
| 11093 | Cystadenocarcinoma, Serous | MYB          | 0 | -5.529193 |  |
| 11094 | Cystadenocarcinoma, Serous | MXD1         | 0 | -5.527451 |  |
| 11095 | Cystadenocarcinoma, Serous | LOC100507192 | 0 | -5.501085 |  |
| 11096 | Cystadenocarcinoma, Serous | CYP3A5       | 0 | -5.495996 |  |
| 11097 | Cystadenocarcinoma, Serous | L1TD1        | 0 | -5.423907 |  |
| 11098 | Cystadenocarcinoma, Serous | CLDN2        | 0 | -5.419162 |  |

|       |                            |           |   |           |  |
|-------|----------------------------|-----------|---|-----------|--|
| 11099 | Cystadenocarcinoma, Serous | ACSL6     | 0 | -5.417387 |  |
| 11100 | Cystadenocarcinoma, Serous | PLEK2     | 0 | -5.40684  |  |
| 11101 | Cystadenocarcinoma, Serous | HEPH      | 0 | -5.404014 |  |
| 11102 | Cystadenocarcinoma, Serous | NOTUM     | 0 | -5.367001 |  |
| 11103 | Cystadenocarcinoma, Serous | BCAN      | 0 | -5.337806 |  |
| 11104 | Cystadenocarcinoma, Serous | CXCL6     | 0 | -5.3255   |  |
| 11105 | Cystadenocarcinoma, Serous | TM4SF20   | 0 | -5.325471 |  |
| 11106 | Cystadenocarcinoma, Serous | GPSM2     | 0 | -5.205413 |  |
| 11107 | Cystadenocarcinoma, Serous | HSD11B2   | 0 | -5.204042 |  |
| 11108 | Cystadenocarcinoma, Serous | RNASE4    | 0 | -5.148506 |  |
| 11109 | Cystadenocarcinoma, Serous | SLC1A7    | 0 | -5.143245 |  |
| 11110 | Cystadenocarcinoma, Serous | RNF43     | 0 | -5.136936 |  |
| 11111 | Cystadenocarcinoma, Serous | SKP2      | 0 | -5.111432 |  |
| 11112 | Cystadenocarcinoma, Serous | CHRD12    | 0 | -5.080581 |  |
| 11113 | Cystadenocarcinoma, Serous | ANG       | 0 | -5.070518 |  |
| 11114 | Cystadenocarcinoma, Serous | FAR2      | 0 | -5.035241 |  |
| 11115 | Cystadenocarcinoma, Serous | ABCB1     | 0 | -5.031336 |  |
| 11116 | Cystadenocarcinoma, Serous | TRPA1     | 0 | -4.983687 |  |
| 11117 | Cystadenocarcinoma, Serous | DOK4      | 0 | -4.95273  |  |
| 11118 | Cystadenocarcinoma, Serous | HKDC1     | 0 | -4.94349  |  |
| 11119 | Cystadenocarcinoma, Serous | PCCA      | 0 | -4.848573 |  |
| 11120 | Cystadenocarcinoma, Serous | IL22RA1   | 0 | -4.829037 |  |
| 11121 | Cystadenocarcinoma, Serous | CYP2J2    | 0 | -4.80905  |  |
| 11122 | Cystadenocarcinoma, Serous | ITGA6     | 0 | -4.808474 |  |
| 11123 | Cystadenocarcinoma, Serous | MYO1A     | 0 | -4.80138  |  |
| 11124 | Cystadenocarcinoma, Serous | GGH       | 0 | -4.797569 |  |
| 11125 | Cystadenocarcinoma, Serous | SMAGP     | 0 | -4.784792 |  |
| 11126 | Cystadenocarcinoma, Serous | LOC285943 | 0 | -4.715135 |  |
| 11127 | Cystadenocarcinoma, Serous | KIF21B    | 0 | -4.664001 |  |
| 11128 | Cystadenocarcinoma, Serous | PPP1R1B   | 0 | -4.641362 |  |
| 11129 | Cystadenocarcinoma, Serous | FA2H      | 0 | -4.582455 |  |
| 11130 | Cystadenocarcinoma, Serous | PTPRH     | 0 | -4.55447  |  |
| 11131 | Cystadenocarcinoma, Serous | AKR1C2    | 0 | -4.545569 |  |
| 11132 | Cystadenocarcinoma, Serous | PPP1R14D  | 0 | -4.527544 |  |
| 11133 | Cystadenocarcinoma, Serous | TESC      | 0 | -4.483325 |  |
| 11134 | Cystadenocarcinoma, Serous | JPH1      | 0 | -4.465564 |  |
| 11135 | Cystadenocarcinoma, Serous | FIBCD1    | 0 | -4.4655   |  |
| 11136 | Cystadenocarcinoma, Serous | CLC       | 0 | -4.414    |  |
| 11137 | Cystadenocarcinoma, Serous | TMEM54    | 0 | -4.413032 |  |
| 11138 | Cystadenocarcinoma, Serous | LOC400573 | 0 | -4.411655 |  |
| 11139 | Cystadenocarcinoma, Serous | PTGS2     | 0 | -4.392851 |  |
| 11140 | Cystadenocarcinoma, Serous | GNG4      | 0 | -4.344921 |  |
| 11141 | Cystadenocarcinoma, Serous | EDN3      | 0 | -4.304979 |  |
| 11142 | Cystadenocarcinoma, Serous | CKMT1A    | 0 | -4.304626 |  |
| 11143 | Cystadenocarcinoma, Serous | A1CF      | 0 | -4.287529 |  |
| 11144 | Cystadenocarcinoma, Serous | DNASE1L3  | 0 | -4.286649 |  |
| 11145 | Cystadenocarcinoma, Serous | SDCBP2    | 0 | -4.284871 |  |
| 11146 | Cystadenocarcinoma, Serous | NEK3      | 0 | -4.279619 |  |
| 11147 | Cystadenocarcinoma, Serous | IL33      | 0 | -4.215678 |  |
| 11148 | Cystadenocarcinoma, Serous | GSDMB     | 0 | -4.205399 |  |

|       |                            |              |          |           |  |
|-------|----------------------------|--------------|----------|-----------|--|
| 11149 | Cystadenocarcinoma, Serous | CYP2S1       | 0        | -4.204536 |  |
| 11150 | Cystadenocarcinoma, Serous | ANKRD22      | 0        | -4.199105 |  |
| 11151 | Cystadenocarcinoma, Serous | VAV3         | 0        | -4.169535 |  |
| 11152 | Cystadenocarcinoma, Serous | PLA2G10      | 0        | -4.164058 |  |
| 11153 | Cystadenocarcinoma, Serous | SERPINB1     | 0        | -4.16136  |  |
| 11154 | Cystadenocarcinoma, Serous | ALDH1A1      | 0        | -4.14217  |  |
| 11155 | Cystadenocarcinoma, Serous | SLC44A3      | 0        | -4.113565 |  |
| 11156 | Cystadenocarcinoma, Serous | TST          | 0        | -4.11211  |  |
| 11157 | Cystadenocarcinoma, Serous | TRPM6        | 0        | -4.110825 |  |
| 11158 | Cystadenocarcinoma, Serous | ID1          | 0        | -4.108161 |  |
| 11159 | Cystadenocarcinoma, Serous | F12          | 0        | -4.095443 |  |
| 11160 | Cystadenocarcinoma, Serous | CCND2        | 0        | -4.052119 |  |
| 11161 | Cystadenocarcinoma, Serous | GRM8         | 0.000001 | -4.001204 |  |
| 11162 | Cystadenocarcinoma, Serous | PLBD1        | 0        | -3.987028 |  |
| 11163 | Cystadenocarcinoma, Serous | AKR1C1       | 0        | -3.968148 |  |
| 11164 | Cystadenocarcinoma, Serous | IL1B         | 0        | -3.840513 |  |
| 11165 | Cystadenocarcinoma, Serous | HOXD13       | 0        | -3.816547 |  |
| 11166 | Cystadenocarcinoma, Serous | NOSTRIN      | 0.000001 | -3.807538 |  |
| 11167 | Cystadenocarcinoma, Serous | LOC100288781 | 0        | -3.783391 |  |
| 11168 | Cystadenocarcinoma, Serous | CES2         | 0        | -3.782455 |  |
| 11169 | Cystadenocarcinoma, Serous | F2RL2        | 0        | -3.772986 |  |
| 11170 | Cystadenocarcinoma, Serous | STAMBPL1     | 0        | -3.734189 |  |
| 11171 | Cystadenocarcinoma, Serous | FLJ22763     | 0        | -3.684372 |  |
| 11172 | Cystadenocarcinoma, Serous | EPS8         | 0        | -3.659213 |  |
| 11173 | Cystadenocarcinoma, Serous | MET          | 0.000001 | -3.658213 |  |
| 11174 | Cystadenocarcinoma, Serous | GPR128       | 0        | -3.644486 |  |
| 11175 | Cystadenocarcinoma, Serous | TTLL6        | 0        | -3.560995 |  |
| 11176 | Cystadenocarcinoma, Serous | SLC13A3      | 0        | -3.549366 |  |
| 11177 | Cystadenocarcinoma, Serous | ENPP3        | 0        | -3.533505 |  |
| 11178 | Cystadenocarcinoma, Serous | HOXD10       | 0        | -3.531011 |  |
| 11179 | Cystadenocarcinoma, Serous | MTMR11       | 0        | -3.519941 |  |
| 11180 | Cystadenocarcinoma, Serous | RBP2         | 0        | -3.516945 |  |
| 11181 | Cystadenocarcinoma, Serous | PAQR8        | 0        | -3.516316 |  |
| 11182 | Cystadenocarcinoma, Serous | GRTP1        | 0        | -3.481063 |  |
| 11183 | Cystadenocarcinoma, Serous | TPSG1        | 0        | -3.468164 |  |
| 11184 | Cystadenocarcinoma, Serous | LOC146336    | 0.000001 | -3.4242   |  |
| 11185 | Cystadenocarcinoma, Serous | BMP2         | 0        | -3.407192 |  |
| 11186 | Cystadenocarcinoma, Serous | IGHG1        | 0        | -3.405295 |  |
| 11187 | Cystadenocarcinoma, Serous | LOC653602    | 0        | -3.368795 |  |
| 11188 | Cystadenocarcinoma, Serous | NHSL1        | 0        | -3.332856 |  |
| 11189 | Cystadenocarcinoma, Serous | VSNL1        | 0        | -3.317272 |  |
| 11190 | Cystadenocarcinoma, Serous | NFE2L3       | 0        | -3.316706 |  |
| 11191 | Cystadenocarcinoma, Serous | BIRC3        | 0        | -3.312392 |  |
| 11192 | Cystadenocarcinoma, Serous | ME1          | 0        | -3.310242 |  |
| 11193 | Cystadenocarcinoma, Serous | GLRX         | 0        | -3.287368 |  |
| 11194 | Cystadenocarcinoma, Serous | NRARP        | 0        | -3.268686 |  |
| 11195 | Cystadenocarcinoma, Serous | CTSW         | 0        | -3.266565 |  |
| 11196 | Cystadenocarcinoma, Serous | C19orf6      | 0        | -3.261974 |  |
| 11197 | Cystadenocarcinoma, Serous | SCML1        | 0        | -3.250374 |  |
| 11198 | Cystadenocarcinoma, Serous | PREP         | 0        | -3.250109 |  |

|       |                            |           |          |           |  |
|-------|----------------------------|-----------|----------|-----------|--|
| 11199 | Cystadenocarcinoma, Serous | ANXA4     | 0        | -3.248235 |  |
| 11200 | Cystadenocarcinoma, Serous | FGGY      | 0        | -3.247028 |  |
| 11201 | Cystadenocarcinoma, Serous | PHLDA1    | 0        | -3.23686  |  |
| 11202 | Cystadenocarcinoma, Serous | IL3RA     | 0        | -3.221795 |  |
| 11203 | Cystadenocarcinoma, Serous | PIWIL1    | 0        | -3.211322 |  |
| 11204 | Cystadenocarcinoma, Serous | CASP1     | 0        | -3.191909 |  |
| 11205 | Cystadenocarcinoma, Serous | MST4      | 0        | -3.191669 |  |
| 11206 | Cystadenocarcinoma, Serous | CD44      | 0        | -3.190672 |  |
| 11207 | Cystadenocarcinoma, Serous | CASP5     | 0        | -3.138952 |  |
| 11208 | Cystadenocarcinoma, Serous | FLJ40292  | 0        | -3.125208 |  |
| 11209 | Cystadenocarcinoma, Serous | SEMA4G    | 0        | -3.104605 |  |
| 11210 | Cystadenocarcinoma, Serous | APOBEC1   | 0        | -3.102199 |  |
| 11211 | Cystadenocarcinoma, Serous | NAMPT     | 0        | -3.086387 |  |
| 11212 | Cystadenocarcinoma, Serous | ADAP1     | 0.000001 | -3.079807 |  |
| 11213 | Cystadenocarcinoma, Serous | FAM105A   | 0        | -3.05774  |  |
| 11214 | Cystadenocarcinoma, Serous | HR        | 0        | -3.048948 |  |
| 11215 | Cystadenocarcinoma, Serous | AXIN2     | 0        | -3.038785 |  |
| 11216 | Cystadenocarcinoma, Serous | FAM108C1  | 0.000001 | -3.033542 |  |
| 11217 | Cystadenocarcinoma, Serous | FOXP2     | 0        | -3.021112 |  |
| 11218 | Cystadenocarcinoma, Serous | PIGZ      | 0        | -2.955051 |  |
| 11219 | Cystadenocarcinoma, Serous | PRSS1     | 0        | -2.934141 |  |
| 11220 | Cystadenocarcinoma, Serous | ST14      | 0.000001 | -2.868657 |  |
| 11221 | Cystadenocarcinoma, Serous | ETHE1     | 0        | -2.837609 |  |
| 11222 | Cystadenocarcinoma, Serous | UNC5CL    | 0        | -2.83193  |  |
| 11223 | Cystadenocarcinoma, Serous | ANKRD57   | 0        | -2.729228 |  |
| 11224 | Cystadenocarcinoma, Serous | MYH14     | 0        | -2.719676 |  |
| 11225 | Cystadenocarcinoma, Serous | MLKL      | 0        | -2.699129 |  |
| 11226 | Cystadenocarcinoma, Serous | AKR7A3    | 0        | -2.688567 |  |
| 11227 | Cystadenocarcinoma, Serous | SH3BGRL2  | 0        | -2.683424 |  |
| 11228 | Cystadenocarcinoma, Serous | LOC25845  | 0        | -2.682844 |  |
| 11229 | Cystadenocarcinoma, Serous | LOC283508 | 0        | -2.635752 |  |
| 11230 | Cystadenocarcinoma, Serous | PLD1      | 0        | -2.630923 |  |
| 11231 | Cystadenocarcinoma, Serous | GNE       | 0        | -2.624701 |  |
| 11232 | Cystadenocarcinoma, Serous | FMO5      | 0        | -2.599217 |  |
| 11233 | Cystadenocarcinoma, Serous | ASPH      | 0.000001 | -2.584645 |  |
| 11234 | Cystadenocarcinoma, Serous | ZNF703    | 0        | -2.563232 |  |
| 11235 | Cystadenocarcinoma, Serous | CD46      | 0        | -2.504414 |  |
| 11236 | Cystadenocarcinoma, Serous | LIMA1     | 0        | -2.47099  |  |
| 11237 | Cystadenocarcinoma, Serous | KITLG     | 0        | -2.464546 |  |
| 11238 | Cystadenocarcinoma, Serous | 3-Mar     | 0        | -2.45257  |  |
| 11239 | Cystadenocarcinoma, Serous | RAB15     | 0        | -2.450992 |  |
| 11240 | Cystadenocarcinoma, Serous | LASS6     | 0        | -2.439166 |  |
| 11241 | Cystadenocarcinoma, Serous | C13orf23  | 0        | -2.428961 |  |
| 11242 | Cystadenocarcinoma, Serous | ZAK       | 0        | -2.411691 |  |
| 11243 | Cystadenocarcinoma, Serous | FRYL      | 0        | -2.391115 |  |
| 11244 | Cystadenocarcinoma, Serous | SOD2      | 0.000001 | -2.363852 |  |
| 11245 | Cystadenocarcinoma, Serous | MUC3A     | 0        | -2.363092 |  |
| 11246 | Cystadenocarcinoma, Serous | CDK8      | 0        | -2.326525 |  |
| 11247 | Cystadenocarcinoma, Serous | LNK2      | 0        | -2.292161 |  |
| 11248 | Cystadenocarcinoma, Serous | PDSS1     | 0        | -2.276462 |  |

|       |                                          |              |          |           |  |
|-------|------------------------------------------|--------------|----------|-----------|--|
| 11249 | Cystadenocarcinoma, Serous               | FAM102B      | 0        | -2.264493 |  |
| 11250 | Cystadenocarcinoma, Serous               | MYO15B       | 0        | -2.233657 |  |
| 11251 | Cystadenocarcinoma, Serous               | RAPGEF5      | 0        | -2.212988 |  |
| 11252 | Cystadenocarcinoma, Serous               | PHF19        | 0        | -2.145259 |  |
| 11253 | Cystadenocarcinoma, Serous               | HCCS         | 0        | -2.084728 |  |
| 11254 | Cystadenocarcinoma, Serous               | CMAS         | 0        | -2.040655 |  |
| 11255 | Cystadenocarcinoma, Serous               | FAM195B      | 0        | 2.085873  |  |
| 11256 | Death                                    | MFAP2        | 0        | 2.032549  |  |
| 11257 | Death                                    | CALD1        | 0        | 2.066687  |  |
| 11258 | Death                                    | IGHG1        | 0        | 2.086508  |  |
| 11259 | Death                                    | TPM2         | 0        | 2.094737  |  |
| 11260 | Death                                    | MMP11        | 0        | 2.155168  |  |
| 11261 | Death                                    | TMEM158      | 0        | 2.168515  |  |
| 11262 | Death                                    | CTSK         | 0        | 2.189639  |  |
| 11263 | Death                                    | SPOCK1       | 0        | 2.207104  |  |
| 11264 | Death                                    | WNT5A        | 0        | 2.230763  |  |
| 11265 | Death                                    | TAGLN        | 0        | 2.230853  |  |
| 11266 | Death                                    | COL15A1      | 0        | 2.260351  |  |
| 11267 | Death                                    | SFRP4        | 0        | 2.276769  |  |
| 11268 | Death                                    | SULF1        | 0        | 2.319154  |  |
| 11269 | Death                                    | MYL9         | 0.000001 | 2.334374  |  |
| 11270 | Death                                    | COL6A1       | 0        | 2.48556   |  |
| 11271 | Death                                    | MMP3         | 0        | 2.756449  |  |
| 11272 | Death                                    | COL11A1      | 0        | 2.790647  |  |
| 11273 | Death                                    | TNC          | 0        | 2.807085  |  |
| 11274 | Death                                    | MMP1         | 0.000001 | 2.832884  |  |
| 11275 | Death                                    | MYH11        | 0        | 2.897326  |  |
| 11276 | Death                                    | GAS1         | 0        | 3.007882  |  |
| 11277 | Death                                    | MFAP5        | 0        | 3.321188  |  |
| 11278 | Death                                    | GREM1        | 0        | 3.545274  |  |
| 11279 | Death                                    | ACTG2        | 0        | 4.912122  |  |
| 11280 | Diabetes Mellitus, Non-Insulin-Dependent | TLX2         | 0.027605 | -2.413984 |  |
| 11281 | Diabetes Mellitus, Non-Insulin-Dependent | RAX2         | 0.000615 | -2.076901 |  |
| 11282 | Diarrhea                                 | SYNGR3       | 0.000295 | -2.022727 |  |
| 11283 | Disease                                  | CDHR1        | 0.000406 | -4.901889 |  |
| 11284 | Disease                                  | AXIN2        | 0.000046 | -4.587413 |  |
| 11285 | Disease                                  | ZNRF3        | 0.000007 | -3.318925 |  |
| 11286 | Disease                                  | ZNF321       | 0.000074 | -3.298804 |  |
| 11287 | Disease                                  | ZNF777       | 0.000089 | -3.27148  |  |
| 11288 | Disease                                  | RNF43        | 0.000046 | -3.214493 |  |
| 11289 | Disease                                  | B4GALT6      | 0.000355 | -3.16038  |  |
| 11290 | Disease                                  | LOC100505730 | 0.000125 | -3.101631 |  |
| 11291 | Disease                                  | FOXA2        | 0.000059 | -2.956134 |  |
| 11292 | Disease                                  | DDX31        | 0.000436 | -2.917829 |  |
| 11293 | Disease                                  | NPIPL3       | 0.000109 | -2.876296 |  |
| 11294 | Disease                                  | RHEB         | 0.00009  | -2.82394  |  |
| 11295 | Disease                                  | C19orf2      | 0.00002  | -2.78316  |  |
| 11296 | Disease                                  | EFNA3        | 0.000334 | -2.774743 |  |
| 11297 | Disease                                  | AMACR        | 0.000009 | -2.733981 |  |
| 11298 | Disease                                  | CCDC113      | 0.000034 | -2.696156 |  |

|       |         |           |          |           |  |
|-------|---------|-----------|----------|-----------|--|
| 11299 | Disease | ARHGAP8   | 0.000084 | -2.637195 |  |
| 11300 | Disease | CYP2S1    | 0.000037 | -2.636245 |  |
| 11301 | Disease | TOP1MT    | 0.000007 | -2.597406 |  |
| 11302 | Disease | CFTR      | 0.000155 | -2.533039 |  |
| 11303 | Disease | TMEM201   | 0.000349 | -2.453447 |  |
| 11304 | Disease | ZNF703    | 0.000227 | -2.404688 |  |
| 11305 | Disease | NMNAT3    | 0.000004 | -2.403053 |  |
| 11306 | Disease | ABHD11    | 0.000124 | -2.312944 |  |
| 11307 | Disease | PPM1H     | 0.000417 | -2.307378 |  |
| 11308 | Disease | L2HGDH    | 0.000098 | -2.267435 |  |
| 11309 | Disease | MACROD1   | 0.000251 | -2.25448  |  |
| 11310 | Disease | IYD       | 0.000401 | -2.237171 |  |
| 11311 | Disease | EXPH5     | 0.00009  | -2.225301 |  |
| 11312 | Disease | AADAT     | 0.000126 | -2.18463  |  |
| 11313 | Disease | POF1B     | 0.000296 | -2.176879 |  |
| 11314 | Disease | C8orf33   | 0.00002  | -2.154067 |  |
| 11315 | Disease | NETO2     | 0.000371 | -2.153651 |  |
| 11316 | Disease | PHF14     | 0.000107 | -2.152611 |  |
| 11317 | Disease | GGH       | 0.000049 | -2.142053 |  |
| 11318 | Disease | ALDH1B1   | 0.000296 | -2.07956  |  |
| 11319 | Disease | MEST      | 0.000006 | -2.067237 |  |
| 11320 | Disease | WNK4      | 0.000292 | -2.063297 |  |
| 11321 | Disease | CIRH1A    | 0.00011  | -2.061629 |  |
| 11322 | Disease | PRMT3     | 0.000227 | -2.055489 |  |
| 11323 | Disease | RAB40B    | 0.00004  | -2.046246 |  |
| 11324 | Disease | PUS7      | 0.000124 | -2.045736 |  |
| 11325 | Disease | ZKSCAN1   | 0.000046 | -2.042176 |  |
| 11326 | Disease | TBRG4     | 0.000124 | -2.040378 |  |
| 11327 | Disease | CXADR     | 0.000271 | -2.036179 |  |
| 11328 | Disease | ZNF704    | 0.000172 | -2.025003 |  |
| 11329 | Disease | SERF1A    | 0.000025 | -2.011575 |  |
| 11330 | Disease | LOC644246 | 0.00014  | 2.00332   |  |
| 11331 | Disease | CROT      | 0.000005 | 2.005005  |  |
| 11332 | Disease | FAM82A1   | 0.000022 | 2.006338  |  |
| 11333 | Disease | GPR82     | 0.000184 | 2.015709  |  |
| 11334 | Disease | AKR7A3    | 0        | 2.030897  |  |
| 11335 | Disease | MFAP2     | 0        | 2.032549  |  |
| 11336 | Disease | APOL6     | 0.000126 | 2.03811   |  |
| 11337 | Disease | PIGL      | 0.000012 | 2.04441   |  |
| 11338 | Disease | HLA-DRA   | 0.000068 | 2.047747  |  |
| 11339 | Disease | CADM3     | 0.000175 | 2.049044  |  |
| 11340 | Disease | DAO       | 0.000086 | 2.052386  |  |
| 11341 | Disease | ALDH6A1   | 0        | 2.052514  |  |
| 11342 | Disease | CRELD2    | 0.000328 | 2.054979  |  |
| 11343 | Disease | CALD1     | 0        | 2.066687  |  |
| 11344 | Disease | XCR1      | 0.000226 | 2.073231  |  |
| 11345 | Disease | PARP9     | 0.000398 | 2.084306  |  |
| 11346 | Disease | IGHG1     | 0        | 2.086508  |  |
| 11347 | Disease | P2RX1     | 0.000032 | 2.088197  |  |
| 11348 | Disease | ARRDC4    | 0.000074 | 2.090461  |  |

|       |         |              |          |          |  |
|-------|---------|--------------|----------|----------|--|
| 11349 | Disease | GPR34        | 0.000002 | 2.091083 |  |
| 11350 | Disease | NLRC5        | 0.00029  | 2.092173 |  |
| 11351 | Disease | HLA-DRB1     | 0.000069 | 2.093284 |  |
| 11352 | Disease | TPM2         | 0        | 2.094737 |  |
| 11353 | Disease | BLNK         | 0.000085 | 2.111861 |  |
| 11354 | Disease | CPT2         | 0        | 2.112139 |  |
| 11355 | Disease | CHRND        | 0.000019 | 2.137341 |  |
| 11356 | Disease | PECI         | 0.000002 | 2.141699 |  |
| 11357 | Disease | STAT1        | 0.000143 | 2.144517 |  |
| 11358 | Disease | CYSLTR1      | 0.000331 | 2.152448 |  |
| 11359 | Disease | ASB2         | 0.000139 | 2.154799 |  |
| 11360 | Disease | MMP11        | 0        | 2.155168 |  |
| 11361 | Disease | IGLV2-23     | 0.000046 | 2.167195 |  |
| 11362 | Disease | KIAA1632     | 0.000005 | 2.167211 |  |
| 11363 | Disease | CFD          | 0.000026 | 2.168027 |  |
| 11364 | Disease | PLCE1        | 0.00002  | 2.168151 |  |
| 11365 | Disease | TMEM158      | 0        | 2.168515 |  |
| 11366 | Disease | C7orf31      | 0.000191 | 2.171703 |  |
| 11367 | Disease | GBP2         | 0.00039  | 2.184644 |  |
| 11368 | Disease | CTSK         | 0        | 2.189639 |  |
| 11369 | Disease | TNXB         | 0.000028 | 2.189652 |  |
| 11370 | Disease | SPOCK1       | 0        | 2.207104 |  |
| 11371 | Disease | MPEG1        | 0.000029 | 2.209908 |  |
| 11372 | Disease | CD1E         | 0.000019 | 2.221066 |  |
| 11373 | Disease | WNT5A        | 0        | 2.230763 |  |
| 11374 | Disease | TAGLN        | 0        | 2.230853 |  |
| 11375 | Disease | PSKH2        | 0.000086 | 2.235311 |  |
| 11376 | Disease | RASA4        | 0.000187 | 2.240732 |  |
| 11377 | Disease | FOLR2        | 0        | 2.249153 |  |
| 11378 | Disease | EDIL3        | 0.000024 | 2.249874 |  |
| 11379 | Disease | ETFDH        | 0        | 2.250393 |  |
| 11380 | Disease | LILRB5       | 0.000019 | 2.255364 |  |
| 11381 | Disease | COL15A1      | 0        | 2.260351 |  |
| 11382 | Disease | LOC100128343 | 0.000129 | 2.260726 |  |
| 11383 | Disease | SFRP4        | 0        | 2.276769 |  |
| 11384 | Disease | LOC728392    | 0.000239 | 2.27988  |  |
| 11385 | Disease | MATN2        | 0.000139 | 2.281556 |  |
| 11386 | Disease | TRDMT1       | 0.000091 | 2.284247 |  |
| 11387 | Disease | CYP4F22      | 0.000208 | 2.288948 |  |
| 11388 | Disease | UBE2L6       | 0.00012  | 2.29084  |  |
| 11389 | Disease | ACADM        | 0        | 2.297784 |  |
| 11390 | Disease | IGKV4-1      | 0.000009 | 2.298194 |  |
| 11391 | Disease | HLA-DPA1     | 0.00009  | 2.303741 |  |
| 11392 | Disease | LST1         | 0.000179 | 2.307241 |  |
| 11393 | Disease | SAMD15       | 0.000128 | 2.310095 |  |
| 11394 | Disease | MAL          | 0        | 2.310783 |  |
| 11395 | Disease | KLRF1        | 0.000028 | 2.313962 |  |
| 11396 | Disease | CTSC         | 0.000008 | 2.318629 |  |
| 11397 | Disease | SULF1        | 0        | 2.319154 |  |
| 11398 | Disease | GSG1L        | 0.000192 | 2.325745 |  |

|       |         |              |          |          |  |
|-------|---------|--------------|----------|----------|--|
| 11399 | Disease | MYL9         | 0.000001 | 2.334374 |  |
| 11400 | Disease | ASXL3        | 0.000235 | 2.338404 |  |
| 11401 | Disease | ANK2         | 0.000058 | 2.343017 |  |
| 11402 | Disease | ZDHHC2       | 0.000056 | 2.348905 |  |
| 11403 | Disease | WNT7A        | 0.000007 | 2.367889 |  |
| 11404 | Disease | C14orf50     | 0.000205 | 2.374697 |  |
| 11405 | Disease | ATP2A3       | 0.000234 | 2.375061 |  |
| 11406 | Disease | TSLP         | 0.000104 | 2.391528 |  |
| 11407 | Disease | CARD16       | 0.000164 | 2.397914 |  |
| 11408 | Disease | ITGA8        | 0        | 2.410465 |  |
| 11409 | Disease | TNFRSF11A    | 0.000034 | 2.413834 |  |
| 11410 | Disease | MPP4         | 0.000023 | 2.430435 |  |
| 11411 | Disease | IGF1         | 0.000005 | 2.435048 |  |
| 11412 | Disease | PEBP4        | 0.000165 | 2.448878 |  |
| 11413 | Disease | KCNIP4       | 0.000014 | 2.458813 |  |
| 11414 | Disease | CD27         | 0.000145 | 2.47417  |  |
| 11415 | Disease | CCR2         | 0.000251 | 2.474624 |  |
| 11416 | Disease | ASAP3        | 0        | 2.477554 |  |
| 11417 | Disease | COL6A1       | 0        | 2.48556  |  |
| 11418 | Disease | VWA5A        | 0.000004 | 2.491612 |  |
| 11419 | Disease | MYO1A        | 0.000193 | 2.501102 |  |
| 11420 | Disease | BTN3A3       | 0.000042 | 2.50311  |  |
| 11421 | Disease | TEK          | 0.000102 | 2.512206 |  |
| 11422 | Disease | LOC727944    | 0.000194 | 2.512875 |  |
| 11423 | Disease | LOC100129503 | 0.000009 | 2.525499 |  |
| 11424 | Disease | KLF15        | 0.000004 | 2.528165 |  |
| 11425 | Disease | HS2ST1       | 0        | 2.537825 |  |
| 11426 | Disease | POU6F1       | 0.000005 | 2.545149 |  |
| 11427 | Disease | C1orf186     | 0.000018 | 2.545849 |  |
| 11428 | Disease | FSIP2        | 0.000161 | 2.571723 |  |
| 11429 | Disease | IGLL5        | 0.000342 | 2.579993 |  |
| 11430 | Disease | NDRG2        | 0        | 2.584615 |  |
| 11431 | Disease | CD40         | 0.000376 | 2.586738 |  |
| 11432 | Disease | TPSAB1       | 0.000139 | 2.589849 |  |
| 11433 | Disease | GPR156       | 0.000042 | 2.609076 |  |
| 11434 | Disease | CNTN4        | 0.000202 | 2.617743 |  |
| 11435 | Disease | PSMB9        | 0.000013 | 2.620499 |  |
| 11436 | Disease | CIITA        | 0.000374 | 2.620771 |  |
| 11437 | Disease | FGFR2        | 0.000189 | 2.622704 |  |
| 11438 | Disease | SFMBT2       | 0.00009  | 2.625821 |  |
| 11439 | Disease | HNF1B        | 0.000018 | 2.630577 |  |
| 11440 | Disease | GATM         | 0.000122 | 2.671051 |  |
| 11441 | Disease | CLEC10A      | 0        | 2.717354 |  |
| 11442 | Disease | GRIN2A       | 0.000165 | 2.719133 |  |
| 11443 | Disease | TNXA         | 0.000014 | 2.726412 |  |
| 11444 | Disease | EPHA7        | 0.000018 | 2.726774 |  |
| 11445 | Disease | SCN9A        | 0.000046 | 2.731662 |  |
| 11446 | Disease | HLA-DMA      | 0.000045 | 2.735534 |  |
| 11447 | Disease | KLRB1        | 0.000009 | 2.735812 |  |
| 11448 | Disease | TPSB2        | 0.000206 | 2.738168 |  |



|       |         |              |          |          |  |
|-------|---------|--------------|----------|----------|--|
| 11449 | Disease | ACADS        | 0        | 2.749732 |  |
| 11450 | Disease | BCL2         | 0        | 2.750296 |  |
| 11451 | Disease | MMP3         | 0        | 2.756449 |  |
| 11452 | Disease | DQX1         | 0.000018 | 2.767648 |  |
| 11453 | Disease | LOC727916    | 0.000037 | 2.775279 |  |
| 11454 | Disease | CA12         | 0.000001 | 2.782355 |  |
| 11455 | Disease | COL11A1      | 0        | 2.790647 |  |
| 11456 | Disease | PDGFD        | 0        | 2.80325  |  |
| 11457 | Disease | HPGD         | 0.00018  | 2.803399 |  |
| 11458 | Disease | TNC          | 0        | 2.807085 |  |
| 11459 | Disease | CES3         | 0.000086 | 2.812385 |  |
| 11460 | Disease | PRIMA1       | 0        | 2.825465 |  |
| 11461 | Disease | MMP1         | 0.000001 | 2.832884 |  |
| 11462 | Disease | F13A1        | 0.000121 | 2.843092 |  |
| 11463 | Disease | GPR17        | 0.000017 | 2.851898 |  |
| 11464 | Disease | COL4A5       | 0.000147 | 2.855223 |  |
| 11465 | Disease | LOC100287411 | 0.000204 | 2.858673 |  |
| 11466 | Disease | LOC100290278 | 0.000002 | 2.878548 |  |
| 11467 | Disease | FXYD1        | 0        | 2.882093 |  |
| 11468 | Disease | MYH11        | 0        | 2.897326 |  |
| 11469 | Disease | PKNOX2       | 0.000043 | 2.90358  |  |
| 11470 | Disease | NRG4         | 0.00019  | 2.908078 |  |
| 11471 | Disease | PTPRZ1       | 0.000001 | 2.912852 |  |
| 11472 | Disease | CLEC4G       | 0.000005 | 2.917786 |  |
| 11473 | Disease | TLR7         | 0        | 2.922728 |  |
| 11474 | Disease | C5orf20      | 0.000092 | 2.932144 |  |
| 11475 | Disease | SPINK2       | 0.000064 | 2.9342   |  |
| 11476 | Disease | SCN3B        | 0.000111 | 2.943865 |  |
| 11477 | Disease | ADH1A        | 0        | 2.943926 |  |
| 11478 | Disease | MOBP         | 0.000005 | 2.950457 |  |
| 11479 | Disease | EPHX2        | 0.000006 | 2.950808 |  |
| 11480 | Disease | CNR1         | 0.000019 | 2.95424  |  |
| 11481 | Disease | HMGCLL1      | 0        | 2.998557 |  |
| 11482 | Disease | BCHE         | 0.000029 | 3.000749 |  |
| 11483 | Disease | CHL1         | 0.000002 | 3.004944 |  |
| 11484 | Disease | CDK3         | 0.000002 | 3.006202 |  |
| 11485 | Disease | GAS1         | 0        | 3.007882 |  |
| 11486 | Disease | NAPSB        | 0.000169 | 3.015791 |  |
| 11487 | Disease | ALDH1A1      | 0.000027 | 3.016823 |  |
| 11488 | Disease | GPR112       | 0.000142 | 3.021562 |  |
| 11489 | Disease | ADAM28       | 0        | 3.066647 |  |
| 11490 | Disease | HPGDS        | 0.000011 | 3.070972 |  |
| 11491 | Disease | FCER1A       | 0        | 3.089502 |  |
| 11492 | Disease | CYP2C9       | 0.000071 | 3.108913 |  |
| 11493 | Disease | ATP13A4      | 0.000011 | 3.125522 |  |
| 11494 | Disease | PBLD         | 0.000116 | 3.132459 |  |
| 11495 | Disease | SCN3A        | 0.000024 | 3.137641 |  |
| 11496 | Disease | LOC100509968 | 0.000037 | 3.156914 |  |
| 11497 | Disease | GGTA1        | 0        | 3.160593 |  |
| 11498 | Disease | ELANE        | 0.000029 | 3.181908 |  |

|       |         |           |          |          |  |
|-------|---------|-----------|----------|----------|--|
| 11499 | Disease | C1orf175  | 0.000024 | 3.193148 |  |
| 11500 | Disease | GPR44     | 0        | 3.246309 |  |
| 11501 | Disease | SLC39A5   | 0.000169 | 3.308423 |  |
| 11502 | Disease | P2RY12    | 0.000002 | 3.308991 |  |
| 11503 | Disease | MFAP5     | 0        | 3.321188 |  |
| 11504 | Disease | ACSM3     | 0        | 3.334575 |  |
| 11505 | Disease | SPTLC3    | 0.000002 | 3.354069 |  |
| 11506 | Disease | FAM19A2   | 0.000002 | 3.37614  |  |
| 11507 | Disease | STOX2     | 0.000001 | 3.37804  |  |
| 11508 | Disease | PADI2     | 0.000045 | 3.386891 |  |
| 11509 | Disease | FAM55A    | 0.000029 | 3.394189 |  |
| 11510 | Disease | SLC3A1    | 0.000006 | 3.449694 |  |
| 11511 | Disease | FLJ32063  | 0.000043 | 3.452081 |  |
| 11512 | Disease | ADH6      | 0        | 3.466088 |  |
| 11513 | Disease | AFF3      | 0        | 3.468184 |  |
| 11514 | Disease | NAP1L2    | 0.000001 | 3.470326 |  |
| 11515 | Disease | HTR4      | 0        | 3.487336 |  |
| 11516 | Disease | XKR4      | 0.000002 | 3.514954 |  |
| 11517 | Disease | GREM1     | 0        | 3.545274 |  |
| 11518 | Disease | LOC285878 | 0.000005 | 3.556821 |  |
| 11519 | Disease | UNC5C     | 0.000002 | 3.564054 |  |
| 11520 | Disease | CEACAM21  | 0.000002 | 3.591098 |  |
| 11521 | Disease | SOX10     | 0        | 3.6005   |  |
| 11522 | Disease | MT1F      | 0.000012 | 3.615807 |  |
| 11523 | Disease | SAMD9L    | 0.000353 | 3.700721 |  |
| 11524 | Disease | ATP1A2    | 0.000005 | 3.753078 |  |
| 11525 | Disease | ENPP6     | 0        | 3.772164 |  |
| 11526 | Disease | FAM150B   | 0        | 3.794586 |  |
| 11527 | Disease | ANPEP     | 0.000236 | 3.883953 |  |
| 11528 | Disease | EGFR      | 0        | 3.938269 |  |
| 11529 | Disease | SEMA3E    | 0.000051 | 3.986633 |  |
| 11530 | Disease | C16orf89  | 0.000001 | 4.018783 |  |
| 11531 | Disease | LPHN3     | 0        | 4.153555 |  |
| 11532 | Disease | ABI3BP    | 0.000001 | 4.204579 |  |
| 11533 | Disease | RDH5      | 0        | 4.333768 |  |
| 11534 | Disease | PCSK2     | 0.000029 | 4.360948 |  |
| 11535 | Disease | ZBTB7C    | 0.000081 | 4.378162 |  |
| 11536 | Disease | FOXD3     | 0.000122 | 4.420381 |  |
| 11537 | Disease | TRHDE     | 0        | 4.450674 |  |
| 11538 | Disease | STMN2     | 0        | 4.479676 |  |
| 11539 | Disease | LIFR      | 0        | 4.487269 |  |
| 11540 | Disease | CRHBP     | 0        | 4.512409 |  |
| 11541 | Disease | GPM6A     | 0.000016 | 4.526743 |  |
| 11542 | Disease | AMPD1     | 0        | 4.595113 |  |
| 11543 | Disease | SCUBE2    | 0        | 4.629786 |  |
| 11544 | Disease | TNFRSF17  | 0.000092 | 4.731065 |  |
| 11545 | Disease | UGT1A1    | 0        | 4.819847 |  |
| 11546 | Disease | HAPLN1    | 0        | 4.884333 |  |
| 11547 | Disease | COL4A6    | 0        | 4.890482 |  |
| 11548 | Disease | ACTG2     | 0        | 4.912122 |  |

|       |                            |          |          |             |  |
|-------|----------------------------|----------|----------|-------------|--|
| 11549 | Disease                    | GFRA2    | 0        | 4.919921    |  |
| 11550 | Disease                    | CXCL12   | 0        | 4.977537    |  |
| 11551 | Disease                    | PTGDR    | 0        | 5.047868    |  |
| 11552 | Disease                    | SCN7A    | 0        | 5.082512    |  |
| 11553 | Disease                    | HHIP     | 0        | 5.086195    |  |
| 11554 | Disease                    | CNTN3    | 0        | 5.094855    |  |
| 11555 | Disease                    | BMP5     | 0        | 5.099133    |  |
| 11556 | Disease                    | CP       | 0        | 5.105175    |  |
| 11557 | Disease                    | CDH19    | 0        | 5.240154    |  |
| 11558 | Disease                    | BTNL8    | 0.000004 | 5.259471    |  |
| 11559 | Disease                    | SCARA5   | 0        | 5.512619    |  |
| 11560 | Disease                    | KIAA2022 | 0.000001 | 5.531687    |  |
| 11561 | Disease                    | UGT1A10  | 0        | 5.560979    |  |
| 11562 | Disease                    | DNASE1L3 | 0        | 5.794383    |  |
| 11563 | Disease                    | ANGPTL1  | 0.000009 | 5.862399    |  |
| 11564 | Disease                    | SH3GL2   | 0        | 5.893378    |  |
| 11565 | Disease                    | NPY1R    | 0.000001 | 5.973849    |  |
| 11566 | Disease                    | SPIB     | 0        | 6.04239     |  |
| 11567 | Disease                    | MT1M     | 0.000192 | 6.085901    |  |
| 11568 | Disease                    | SOSTDC1  | 0        | 6.103031    |  |
| 11569 | Disease                    | CWH43    | 0        | 6.105076    |  |
| 11570 | Disease                    | CA7      | 0.000041 | 6.213849    |  |
| 11571 | Disease                    | ADAMDEC1 | 0        | 6.26407     |  |
| 11572 | Disease                    | ADH1B    | 0.000002 | 6.364333    |  |
| 11573 | Disease                    | GLP2R    | 0        | 6.40128     |  |
| 11574 | Disease                    | UGT1A8   | 0        | 6.439246    |  |
| 11575 | Disease                    | HMGCS2   | 0        | 6.614129    |  |
| 11576 | Disease                    | MAMDC2   | 0        | 6.863978    |  |
| 11577 | Disease                    | SLC38A4  | 0        | 7.038634    |  |
| 11578 | Disease                    | MYOT     | 0        | 7.149669    |  |
| 11579 | Disease                    | USP2     | 0.000012 | 7.323947    |  |
| 11580 | Disease                    | HLA-DQA1 | 0.000006 | 7.356785    |  |
| 11581 | Disease                    | NPY6R    | 0        | 7.53012     |  |
| 11582 | Disease                    | NRXN1    | 0        | 7.559167    |  |
| 11583 | Disease                    | IGHA1    | 0        | 7.658346    |  |
| 11584 | Disease                    | ABCA8    | 0        | 7.762877    |  |
| 11585 | Disease                    | BEST4    | 0.00001  | 7.918943    |  |
| 11586 | Disease                    | FAM5C    | 0        | 8.075867    |  |
| 11587 | Disease                    | ADH1C    | 0        | 8.224757    |  |
| 11588 | Disease                    | UGT2B15  | 0.000005 | 8.436109    |  |
| 11589 | Disease                    | SLC25A34 | 0.000001 | 8.565647    |  |
| 11590 | Disease                    | HLA-DQB1 | 0.000025 | 8.791445    |  |
| 11591 | Disease                    | GCNT2    | 0        | 10.107209   |  |
| 11592 | Disease                    | OSTalpha | 0.000147 | 10.193135   |  |
| 11593 | Disease                    | PLP1     | 0        | 11.208816   |  |
| 11594 | Disease                    | VSTM2A   | 0        | 16.865782   |  |
| 11595 | Dominant-Negative Mutation | CYB5A    | 0.000114 | -497.719424 |  |
| 11596 | Dominant-Negative Mutation | PXDN     | 0.00003  | -34.689751  |  |
| 11597 | Dominant-Negative Mutation | ZIC2     | 0.000437 | -31.843284  |  |
| 11598 | Dominant-Negative Mutation | LITAF    | 0.000053 | -26.621554  |  |

|       |                            |              |          |            |  |
|-------|----------------------------|--------------|----------|------------|--|
| 11599 | Dominant-Negative Mutation | TCEA3        | 0.000058 | -23.553522 |  |
| 11600 | Dominant-Negative Mutation | EPB41L3      | 0.000351 | -22.172662 |  |
| 11601 | Dominant-Negative Mutation | UNC5A        | 0.000607 | -21.517442 |  |
| 11602 | Dominant-Negative Mutation | ABCB1        | 0.000482 | -18.547662 |  |
| 11603 | Dominant-Negative Mutation | TLE2         | 0.000486 | -15.588353 |  |
| 11604 | Dominant-Negative Mutation | PARVG        | 0.00005  | -15.210227 |  |
| 11605 | Dominant-Negative Mutation | LOC100289026 | 0.000015 | -13.35725  |  |
| 11606 | Dominant-Negative Mutation | NPL          | 0.000551 | -12.480296 |  |
| 11607 | Dominant-Negative Mutation | GNAL         | 0.00003  | -11.805769 |  |
| 11608 | Dominant-Negative Mutation | TNFRSF18     | 0.000187 | -9.901515  |  |
| 11609 | Dominant-Negative Mutation | RHBDL1       | 0.000075 | -8.661224  |  |
| 11610 | Dominant-Negative Mutation | TIMP3        | 0.000064 | -8.627737  |  |
| 11611 | Dominant-Negative Mutation | RAC3         | 0.000196 | -8.302583  |  |
| 11612 | Dominant-Negative Mutation | CIB2         | 0.000564 | -8.107981  |  |
| 11613 | Dominant-Negative Mutation | KLC3         | 0.000382 | -7.331104  |  |
| 11614 | Dominant-Negative Mutation | C11orf93     | 0.000061 | -7.250724  |  |
| 11615 | Dominant-Negative Mutation | C11orf53     | 0.000115 | -7.249453  |  |
| 11616 | Dominant-Negative Mutation | TTL          | 0.000202 | -7.123457  |  |
| 11617 | Dominant-Negative Mutation | FUT1         | 0.000219 | -6.783496  |  |
| 11618 | Dominant-Negative Mutation | DLX2         | 0.000271 | -6.697201  |  |
| 11619 | Dominant-Negative Mutation | WNT4         | 0.000393 | -6.517647  |  |
| 11620 | Dominant-Negative Mutation | SLC6A10P     | 0.000156 | -6.252374  |  |
| 11621 | Dominant-Negative Mutation | GPR124       | 0.000137 | -6.185279  |  |
| 11622 | Dominant-Negative Mutation | IL1F7        | 0.000275 | -5.996226  |  |
| 11623 | Dominant-Negative Mutation | MRAS         | 0.000002 | -5.970402  |  |
| 11624 | Dominant-Negative Mutation | CDH3         | 0.000564 | -5.904728  |  |
| 11625 | Dominant-Negative Mutation | C11orf30     | 0.000021 | -5.900891  |  |
| 11626 | Dominant-Negative Mutation | ZNF704       | 0.000142 | -5.88162   |  |
| 11627 | Dominant-Negative Mutation | PRODH        | 0.000408 | -5.875641  |  |
| 11628 | Dominant-Negative Mutation | TCF4         | 0.000341 | -5.712788  |  |
| 11629 | Dominant-Negative Mutation | ABCC4        | 0.000219 | -5.561098  |  |
| 11630 | Dominant-Negative Mutation | APH1B        | 0.000114 | -5.553459  |  |
| 11631 | Dominant-Negative Mutation | LMF1         | 0.000513 | -5.430435  |  |
| 11632 | Dominant-Negative Mutation | C4orf19      | 0.000367 | -5.339512  |  |
| 11633 | Dominant-Negative Mutation | C1QTNF1      | 0.000228 | -5.327957  |  |
| 11634 | Dominant-Negative Mutation | GALNT12      | 0.000082 | -5.173536  |  |
| 11635 | Dominant-Negative Mutation | SORBS3       | 0.000259 | -5.101449  |  |
| 11636 | Dominant-Negative Mutation | MXRA7        | 0.000001 | -4.994552  |  |
| 11637 | Dominant-Negative Mutation | PDGFC        | 0.000001 | -4.989535  |  |
| 11638 | Dominant-Negative Mutation | CD70         | 0.000555 | -4.937659  |  |
| 11639 | Dominant-Negative Mutation | CDC42EP5     | 0.000176 | -4.798045  |  |
| 11640 | Dominant-Negative Mutation | FLJ37644     | 0.000413 | -4.712144  |  |
| 11641 | Dominant-Negative Mutation | SHH          | 0.000143 | -4.677488  |  |
| 11642 | Dominant-Negative Mutation | RAB26        | 0.000042 | -4.644335  |  |
| 11643 | Dominant-Negative Mutation | PHLDA3       | 0.00002  | -4.586603  |  |
| 11644 | Dominant-Negative Mutation | ZNF358       | 0.000279 | -4.585557  |  |
| 11645 | Dominant-Negative Mutation | FLJ36031     | 0.000142 | -4.480278  |  |
| 11646 | Dominant-Negative Mutation | FSCN1        | 0.000014 | -4.370552  |  |
| 11647 | Dominant-Negative Mutation | GXYLT2       | 0.000569 | -4.264637  |  |
| 11648 | Dominant-Negative Mutation | LOC283104    | 0.000279 | -4.155987  |  |

|       |                            |           |          |           |  |
|-------|----------------------------|-----------|----------|-----------|--|
| 11649 | Dominant-Negative Mutation | FADS2     | 0.000551 | -3.903226 |  |
| 11650 | Dominant-Negative Mutation | MCCC1     | 0.000187 | -3.848696 |  |
| 11651 | Dominant-Negative Mutation | PROCR     | 0.000259 | -3.835196 |  |
| 11652 | Dominant-Negative Mutation | FAM119A   | 0.000005 | -3.765769 |  |
| 11653 | Dominant-Negative Mutation | LTBP3     | 0.000002 | -3.619344 |  |
| 11654 | Dominant-Negative Mutation | FLJ41757  | 0.00048  | -3.605058 |  |
| 11655 | Dominant-Negative Mutation | CNFN      | 0.000266 | -3.585442 |  |
| 11656 | Dominant-Negative Mutation | ARHGAP32  | 0.00003  | -3.550023 |  |
| 11657 | Dominant-Negative Mutation | LOC729680 | 0.000244 | -3.501818 |  |
| 11658 | Dominant-Negative Mutation | PCCA      | 0.000125 | -3.463857 |  |
| 11659 | Dominant-Negative Mutation | C19orf45  | 0.000612 | -3.436083 |  |
| 11660 | Dominant-Negative Mutation | NOX1      | 0.000279 | -3.434399 |  |
| 11661 | Dominant-Negative Mutation | NAGS      | 0.00012  | -3.375294 |  |
| 11662 | Dominant-Negative Mutation | ATP6V1E2  | 0.000492 | -3.370556 |  |
| 11663 | Dominant-Negative Mutation | AGMAT     | 0.000114 | -3.339683 |  |
| 11664 | Dominant-Negative Mutation | AIFM3     | 0.000228 | -3.295077 |  |
| 11665 | Dominant-Negative Mutation | HSPB1     | 0.00007  | -3.269693 |  |
| 11666 | Dominant-Negative Mutation | KLF11     | 0.000219 | -3.248634 |  |
| 11667 | Dominant-Negative Mutation | NEO1      | 0.000564 | -3.231681 |  |
| 11668 | Dominant-Negative Mutation | KAZ       | 0.000187 | -3.209017 |  |
| 11669 | Dominant-Negative Mutation | HYI       | 0.000441 | -3.155569 |  |
| 11670 | Dominant-Negative Mutation | THNSL1    | 0.000149 | -3.124434 |  |
| 11671 | Dominant-Negative Mutation | ATPBD4    | 0.000112 | -3.109684 |  |
| 11672 | Dominant-Negative Mutation | MDK       | 0.000446 | -3.092344 |  |
| 11673 | Dominant-Negative Mutation | ASPHD2    | 0.000341 | -3.03538  |  |
| 11674 | Dominant-Negative Mutation | ATP13A2   | 0.0002   | -3.004528 |  |
| 11675 | Dominant-Negative Mutation | CPS1      | 0.000002 | -2.967478 |  |
| 11676 | Dominant-Negative Mutation | LOC255512 | 0.000361 | -2.94404  |  |
| 11677 | Dominant-Negative Mutation | ARHGEF10  | 0.000279 | -2.912243 |  |
| 11678 | Dominant-Negative Mutation | KRTCAP3   | 0.000414 | -2.902283 |  |
| 11679 | Dominant-Negative Mutation | C9orf40   | 0.000602 | -2.854545 |  |
| 11680 | Dominant-Negative Mutation | MMS19     | 0.000018 | -2.84468  |  |
| 11681 | Dominant-Negative Mutation | CLN3      | 0.000412 | -2.84375  |  |
| 11682 | Dominant-Negative Mutation | SH2D2A    | 0.000499 | -2.836379 |  |
| 11683 | Dominant-Negative Mutation | DPH5      | 0.000437 | -2.807949 |  |
| 11684 | Dominant-Negative Mutation | DNAJC4    | 0.000125 | -2.793849 |  |
| 11685 | Dominant-Negative Mutation | RPL35A    | 0.000129 | -2.785454 |  |
| 11686 | Dominant-Negative Mutation | CNDP2     | 0.00012  | -2.744491 |  |
| 11687 | Dominant-Negative Mutation | PKIG      | 0.000445 | -2.741006 |  |
| 11688 | Dominant-Negative Mutation | KLK12     | 0.000259 | -2.740593 |  |
| 11689 | Dominant-Negative Mutation | ALDOC     | 0.000382 | -2.711191 |  |
| 11690 | Dominant-Negative Mutation | SH3YL1    | 0.000002 | -2.683318 |  |
| 11691 | Dominant-Negative Mutation | GAMT      | 0.000143 | -2.666422 |  |
| 11692 | Dominant-Negative Mutation | GAS5      | 0.000142 | -2.653625 |  |
| 11693 | Dominant-Negative Mutation | WDYHV1    | 0.000235 | -2.653118 |  |
| 11694 | Dominant-Negative Mutation | RPL13A    | 0.000331 | -2.645398 |  |
| 11695 | Dominant-Negative Mutation | HAUS4     | 0.000177 | -2.620348 |  |
| 11696 | Dominant-Negative Mutation | DYRK4     | 0.00007  | -2.615305 |  |
| 11697 | Dominant-Negative Mutation | SLC25A21  | 0.000271 | -2.542119 |  |
| 11698 | Dominant-Negative Mutation | C9orf86   | 0.000367 | -2.540431 |  |

|       |                            |             |          |           |  |
|-------|----------------------------|-------------|----------|-----------|--|
| 11699 | Dominant-Negative Mutation | STRADB      | 0.000143 | -2.532233 |  |
| 11700 | Dominant-Negative Mutation | SMARCD3     | 0.000128 | -2.530565 |  |
| 11701 | Dominant-Negative Mutation | NOB1        | 0.000553 | -2.523267 |  |
| 11702 | Dominant-Negative Mutation | MARVELD1    | 0.000568 | -2.514161 |  |
| 11703 | Dominant-Negative Mutation | DPY30       | 0.000143 | -2.4865   |  |
| 11704 | Dominant-Negative Mutation | GDF11       | 0.000432 | -2.480144 |  |
| 11705 | Dominant-Negative Mutation | C4orf14     | 0.000437 | -2.47461  |  |
| 11706 | Dominant-Negative Mutation | TBC1D1      | 0.000308 | -2.448241 |  |
| 11707 | Dominant-Negative Mutation | SNORD104    | 0.000624 | -2.440978 |  |
| 11708 | Dominant-Negative Mutation | SLC25A6     | 0.00034  | -2.434351 |  |
| 11709 | Dominant-Negative Mutation | PYGL        | 0.000602 | -2.427988 |  |
| 11710 | Dominant-Negative Mutation | WDR4        | 0.000532 | -2.42595  |  |
| 11711 | Dominant-Negative Mutation | GART        | 0.000434 | -2.418457 |  |
| 11712 | Dominant-Negative Mutation | SLC38A10    | 0.000553 | -2.412111 |  |
| 11713 | Dominant-Negative Mutation | CXXC5       | 0.000079 | -2.389303 |  |
| 11714 | Dominant-Negative Mutation | EIF4B       | 0.000312 | -2.381829 |  |
| 11715 | Dominant-Negative Mutation | ZFAND2B     | 0.000489 | -2.366606 |  |
| 11716 | Dominant-Negative Mutation | AGPHD1      | 0.000091 | -2.36445  |  |
| 11717 | Dominant-Negative Mutation | KIAA0141    | 0.000179 | -2.349644 |  |
| 11718 | Dominant-Negative Mutation | RBCK1       | 0.000486 | -2.340571 |  |
| 11719 | Dominant-Negative Mutation | ANKHD1-EIF4 | 0.000437 | -2.305972 |  |
| 11720 | Dominant-Negative Mutation | ATP5G2      | 0.000259 | -2.290497 |  |
| 11721 | Dominant-Negative Mutation | HSBP1L1     | 0.000067 | -2.281044 |  |
| 11722 | Dominant-Negative Mutation | ARPC3       | 0.000612 | -2.271593 |  |
| 11723 | Dominant-Negative Mutation | TPD52L1     | 0.000315 | -2.270668 |  |
| 11724 | Dominant-Negative Mutation | FRAT2       | 0.000418 | -2.247018 |  |
| 11725 | Dominant-Negative Mutation | ARL2        | 0.000607 | -2.246019 |  |
| 11726 | Dominant-Negative Mutation | SCCPDH      | 0.000259 | -2.231617 |  |
| 11727 | Dominant-Negative Mutation | TIMM8B      | 0.000254 | -2.230223 |  |
| 11728 | Dominant-Negative Mutation | BIRC6       | 0.000564 | -2.20328  |  |
| 11729 | Dominant-Negative Mutation | GBAS        | 0.000367 | -2.202874 |  |
| 11730 | Dominant-Negative Mutation | C6orf108    | 0.000196 | -2.158936 |  |
| 11731 | Dominant-Negative Mutation | CHST3       | 0.000407 | -2.132689 |  |
| 11732 | Dominant-Negative Mutation | SLC39A4     | 0.000378 | -2.128275 |  |
| 11733 | Dominant-Negative Mutation | MIPEP       | 0.00007  | -2.116788 |  |
| 11734 | Dominant-Negative Mutation | PREPL       | 0.000058 | -2.095728 |  |
| 11735 | Dominant-Negative Mutation | TAF1D       | 0.00007  | -2.095709 |  |
| 11736 | Dominant-Negative Mutation | SLC17A9     | 0.000143 | -2.079349 |  |
| 11737 | Dominant-Negative Mutation | EXOSC1      | 0.000259 | -2.075314 |  |
| 11738 | Dominant-Negative Mutation | MAGED1      | 0.000376 | -2.073153 |  |
| 11739 | Dominant-Negative Mutation | C1orf57     | 0.000615 | -2.042778 |  |
| 11740 | Dominant-Negative Mutation | C2orf28     | 0.00052  | -2.041845 |  |
| 11741 | Dominant-Negative Mutation | ZFP62       | 0.000058 | -2.032576 |  |
| 11742 | Dominant-Negative Mutation | TMEM18      | 0.000257 | -2.026822 |  |
| 11743 | Dominant-Negative Mutation | HN1         | 0.000033 | 2.003492  |  |
| 11744 | Dominant-Negative Mutation | MYST3       | 0.000605 | 2.012837  |  |
| 11745 | Dominant-Negative Mutation | MBD4        | 0.000087 | 2.02786   |  |
| 11746 | Dominant-Negative Mutation | C17orf85    | 0.000287 | 2.030274  |  |
| 11747 | Dominant-Negative Mutation | SH3BGRL2    | 0.000259 | 2.031019  |  |
| 11748 | Dominant-Negative Mutation | TMEM50A     | 0.000259 | 2.047113  |  |

|       |                            |          |          |          |  |
|-------|----------------------------|----------|----------|----------|--|
| 11749 | Dominant-Negative Mutation | GPR107   | 0.000266 | 2.051135 |  |
| 11750 | Dominant-Negative Mutation | RB1      | 0.000078 | 2.05352  |  |
| 11751 | Dominant-Negative Mutation | FAM122B  | 0.000129 | 2.05692  |  |
| 11752 | Dominant-Negative Mutation | GGCX     | 0.000191 | 2.075676 |  |
| 11753 | Dominant-Negative Mutation | MAPRE2   | 0.000392 | 2.088331 |  |
| 11754 | Dominant-Negative Mutation | UPF3A    | 0.000487 | 2.116966 |  |
| 11755 | Dominant-Negative Mutation | ARPC5L   | 0.000064 | 2.134362 |  |
| 11756 | Dominant-Negative Mutation | PSMD5    | 0.000018 | 2.135035 |  |
| 11757 | Dominant-Negative Mutation | YTHDC2   | 0.000096 | 2.176141 |  |
| 11758 | Dominant-Negative Mutation | FRG1     | 0.000112 | 2.210131 |  |
| 11759 | Dominant-Negative Mutation | VAPA     | 0.000437 | 2.236095 |  |
| 11760 | Dominant-Negative Mutation | ROD1     | 0.000114 | 2.270856 |  |
| 11761 | Dominant-Negative Mutation | FAM91A2  | 0.000614 | 2.287029 |  |
| 11762 | Dominant-Negative Mutation | HIST1H1C | 0.000058 | 2.309695 |  |
| 11763 | Dominant-Negative Mutation | GAPVD1   | 0.000259 | 2.351562 |  |
| 11764 | Dominant-Negative Mutation | GPS2     | 0.000015 | 2.357439 |  |
| 11765 | Dominant-Negative Mutation | DOLPP1   | 0.000064 | 2.403751 |  |
| 11766 | Dominant-Negative Mutation | SUGT1    | 0.000413 | 2.430777 |  |
| 11767 | Dominant-Negative Mutation | VAPB     | 0.000259 | 2.433886 |  |
| 11768 | Dominant-Negative Mutation | ZC3H13   | 0.00008  | 2.449023 |  |
| 11769 | Dominant-Negative Mutation | DSG2     | 0.000062 | 2.460754 |  |
| 11770 | Dominant-Negative Mutation | UBE3C    | 0.000058 | 2.522976 |  |
| 11771 | Dominant-Negative Mutation | HOXA13   | 0.000143 | 2.550304 |  |
| 11772 | Dominant-Negative Mutation | ZNF271   | 0.000626 | 2.562873 |  |
| 11773 | Dominant-Negative Mutation | ZCCHC2   | 0.000382 | 2.590748 |  |
| 11774 | Dominant-Negative Mutation | TM9SF3   | 0.000143 | 2.59314  |  |
| 11775 | Dominant-Negative Mutation | SGCB     | 0.000015 | 2.689522 |  |
| 11776 | Dominant-Negative Mutation | MRPL35   | 0.000564 | 2.712121 |  |
| 11777 | Dominant-Negative Mutation | SLC16A1  | 0.000175 | 2.715163 |  |
| 11778 | Dominant-Negative Mutation | NBN      | 0.000065 | 2.803623 |  |
| 11779 | Dominant-Negative Mutation | HOXB7    | 0.000109 | 2.850091 |  |
| 11780 | Dominant-Negative Mutation | PRRG4    | 0.000001 | 2.878893 |  |
| 11781 | Dominant-Negative Mutation | SEPW1    | 0.000014 | 2.899693 |  |
| 11782 | Dominant-Negative Mutation | ASH1L    | 0.000058 | 2.991166 |  |
| 11783 | Dominant-Negative Mutation | ALDH3A1  | 0.00048  | 3.025803 |  |
| 11784 | Dominant-Negative Mutation | MSN      | 0.000121 | 3.047942 |  |
| 11785 | Dominant-Negative Mutation | PIGN     | 0.000049 | 3.062276 |  |
| 11786 | Dominant-Negative Mutation | DNAJB6   | 0.00007  | 3.07301  |  |
| 11787 | Dominant-Negative Mutation | ARGLU1   | 0.000279 | 3.146774 |  |
| 11788 | Dominant-Negative Mutation | TTC39C   | 0.00052  | 3.154439 |  |
| 11789 | Dominant-Negative Mutation | ING2     | 0.000177 | 3.185976 |  |
| 11790 | Dominant-Negative Mutation | MECOM    | 0.000112 | 3.198311 |  |
| 11791 | Dominant-Negative Mutation | DSC2     | 0.000018 | 3.231242 |  |
| 11792 | Dominant-Negative Mutation | TXNDC9   | 0.000143 | 3.328385 |  |
| 11793 | Dominant-Negative Mutation | PIK3C3   | 0.000003 | 3.343665 |  |
| 11794 | Dominant-Negative Mutation | ATXN1    | 0.000166 | 3.387009 |  |
| 11795 | Dominant-Negative Mutation | TNRC18   | 0.000082 | 3.412363 |  |
| 11796 | Dominant-Negative Mutation | RHOU     | 0.000078 | 3.614124 |  |
| 11797 | Dominant-Negative Mutation | ESYT2    | 0.000458 | 3.665878 |  |
| 11798 | Dominant-Negative Mutation | INO80C   | 0.000135 | 3.731187 |  |

|       |                            |              |          |            |  |
|-------|----------------------------|--------------|----------|------------|--|
| 11799 | Dominant-Negative Mutation | TUG1         | 0.000015 | 3.752775   |  |
| 11800 | Dominant-Negative Mutation | RTTN         | 0.000002 | 3.816143   |  |
| 11801 | Dominant-Negative Mutation | GEM          | 0.000143 | 3.9926     |  |
| 11802 | Dominant-Negative Mutation | TPRXL        | 0.00018  | 4.054795   |  |
| 11803 | Dominant-Negative Mutation | LOC100505875 | 0.000492 | 4.152001   |  |
| 11804 | Dominant-Negative Mutation | FAM50B       | 0.000018 | 4.335119   |  |
| 11805 | Dominant-Negative Mutation | PTGR1        | 0.000001 | 4.486203   |  |
| 11806 | Dominant-Negative Mutation | UGT1A6       | 0.000406 | 4.496336   |  |
| 11807 | Dominant-Negative Mutation | SYNJ2        | 0.000382 | 4.635881   |  |
| 11808 | Dominant-Negative Mutation | LIMCH1       | 0.000303 | 4.710667   |  |
| 11809 | Dominant-Negative Mutation | ZNF558       | 0.000114 | 5.356884   |  |
| 11810 | Dominant-Negative Mutation | ZNF426       | 0.000112 | 5.90991    |  |
| 11811 | Dominant-Negative Mutation | SH3TC2       | 0.000208 | 6.079137   |  |
| 11812 | Dominant-Negative Mutation | SPIN3        | 0.000147 | 7.489164   |  |
| 11813 | Dominant-Negative Mutation | ZNF204P      | 0.000614 | 8.492386   |  |
| 11814 | Dominant-Negative Mutation | BAT3         | 0.000087 | 9.181054   |  |
| 11815 | Dominant-Negative Mutation | PRUNE2       | 0.000015 | 9.361624   |  |
| 11816 | Dominant-Negative Mutation | RASA1        | 0.00018  | 9.621369   |  |
| 11817 | Dominant-Negative Mutation | MT1M         | 0.000016 | 11.080972  |  |
| 11818 | Dominant-Negative Mutation | FAM129A      | 0.000243 | 14.358025  |  |
| 11819 | Dominant-Negative Mutation | SERPINB5     | 0.00007  | 14.794114  |  |
| 11820 | Dominant-Negative Mutation | AKAP12       | 0.000382 | 19.882979  |  |
| 11821 | Dominant-Negative Mutation | REG1A        | 0.000149 | 36.576833  |  |
| 11822 | Ductal Breast Carcinoma    | ENOSF1       | 0.04975  | -2.163659  |  |
| 11823 | Ductal Breast Carcinoma    | LOC728448    | 0.004106 | 2.432727   |  |
| 11824 | Ductal Breast Carcinoma    | TCERG1       | 0.047633 | 2.472226   |  |
| 11825 | Ductal Carcinoma           | ENOSF1       | 0.04975  | -2.163659  |  |
| 11826 | Ductal Carcinoma           | LOC728448    | 0.004106 | 2.432727   |  |
| 11827 | Ductal Carcinoma           | TCERG1       | 0.047633 | 2.472226   |  |
| 11828 | Dysplasia                  | CLCA4        | 0.000074 | -84.873382 |  |
| 11829 | Dysplasia                  | SPINK5       | 0.000031 | -32.239686 |  |
| 11830 | Dysplasia                  | ACHE         | 0.000024 | -23.943237 |  |
| 11831 | Dysplasia                  | SLC25A34     | 0.000046 | -21.203959 |  |
| 11832 | Dysplasia                  | ZG16         | 0.000004 | -20.112805 |  |
| 11833 | Dysplasia                  | ANO5         | 0.000073 | -19.197245 |  |
| 11834 | Dysplasia                  | DHRS9        | 0.000068 | -17.872567 |  |
| 11835 | Dysplasia                  | OSTBETA      | 0.000025 | -17.297428 |  |
| 11836 | Dysplasia                  | DPEP2        | 0.000041 | -15.654621 |  |
| 11837 | Dysplasia                  | OLFM1        | 0        | -15.232331 |  |
| 11838 | Dysplasia                  | STMN2        | 0.000003 | -14.933347 |  |
| 11839 | Dysplasia                  | BTNL8        | 0.000017 | -14.197677 |  |
| 11840 | Dysplasia                  | SLC15A1      | 0.000019 | -13.109778 |  |
| 11841 | Dysplasia                  | CYBRD1       | 0.000011 | -11.498188 |  |
| 11842 | Dysplasia                  | PYY          | 0        | -11.401911 |  |
| 11843 | Dysplasia                  | CRYBA2       | 0.000001 | -11.209007 |  |
| 11844 | Dysplasia                  | C11orf86     | 0.000005 | -11.074642 |  |
| 11845 | Dysplasia                  | CEACAM7      | 0.000002 | -11.049524 |  |
| 11846 | Dysplasia                  | LGALS2       | 0.000022 | -10.968017 |  |
| 11847 | Dysplasia                  | CD177        | 0.000001 | -10.95502  |  |
| 11848 | Dysplasia                  | MALL         | 0.000001 | -10.58266  |  |



|       |           |           |          |            |  |
|-------|-----------|-----------|----------|------------|--|
| 11849 | Dysplasia | CA2       | 0.000003 | -10.158465 |  |
| 11850 | Dysplasia | GUCA2B    | 0.000001 | -9.894457  |  |
| 11851 | Dysplasia | APBB1     | 0.000007 | -9.770749  |  |
| 11852 | Dysplasia | TRPM6     | 0        | -9.613446  |  |
| 11853 | Dysplasia | EPB41L3   | 0.000002 | -9.566043  |  |
| 11854 | Dysplasia | TCF21     | 0        | -9.193144  |  |
| 11855 | Dysplasia | HPGD      | 0.00001  | -9.155656  |  |
| 11856 | Dysplasia | TAF13     | 0.000076 | -8.867731  |  |
| 11857 | Dysplasia | CDKN2B-AS | 0.000002 | -8.855571  |  |
| 11858 | Dysplasia | CDA       | 0.000052 | -7.974413  |  |
| 11859 | Dysplasia | CCDC102B  | 0.000001 | -7.700813  |  |
| 11860 | Dysplasia | SDCBP2    | 0.000007 | -7.428168  |  |
| 11861 | Dysplasia | ZNF568    | 0.000024 | -7.327563  |  |
| 11862 | Dysplasia | GUCA2A    | 0        | -7.294218  |  |
| 11863 | Dysplasia | AQP8      | 0.000004 | -7.284831  |  |
| 11864 | Dysplasia | PLEKHG2   | 0.000054 | -7.265051  |  |
| 11865 | Dysplasia | HSD17B2   | 0.000023 | -7.156495  |  |
| 11866 | Dysplasia | FEV       | 0.000002 | -7.139037  |  |
| 11867 | Dysplasia | FLJ35700  | 0.000058 | -7.106864  |  |
| 11868 | Dysplasia | GDPD2     | 0.000029 | -7.091095  |  |
| 11869 | Dysplasia | TPH1      | 0.000003 | -7.005897  |  |
| 11870 | Dysplasia | PKNOX2    | 0.000046 | -6.995376  |  |
| 11871 | Dysplasia | RAB9B     | 0.000039 | -6.901206  |  |
| 11872 | Dysplasia | ENPP6     | 0.000082 | -6.893884  |  |
| 11873 | Dysplasia | BEST4     | 0.000005 | -6.576351  |  |
| 11874 | Dysplasia | CELA3A    | 0.000054 | -6.497474  |  |
| 11875 | Dysplasia | HRCT1     | 0.000044 | -6.487225  |  |
| 11876 | Dysplasia | CHGB      | 0.000032 | -6.347379  |  |
| 11877 | Dysplasia | SLCO2B1   | 0.000011 | -6.318094  |  |
| 11878 | Dysplasia | PRKAA2    | 0.000019 | -6.127948  |  |
| 11879 | Dysplasia | GPAT2     | 0.000035 | -6.11638   |  |
| 11880 | Dysplasia | CA7       | 0        | -6.05505   |  |
| 11881 | Dysplasia | DSEL      | 0.000007 | -5.961644  |  |
| 11882 | Dysplasia | CELA3B    | 0.000055 | -5.881904  |  |
| 11883 | Dysplasia | CTSW      | 0.000006 | -5.831313  |  |
| 11884 | Dysplasia | SOSTDC1   | 0.000007 | -5.715365  |  |
| 11885 | Dysplasia | CLECL1    | 0.000024 | -5.673399  |  |
| 11886 | Dysplasia | HTR4      | 0.000024 | -5.522219  |  |
| 11887 | Dysplasia | IL16      | 0.000032 | -5.408401  |  |
| 11888 | Dysplasia | SLC6A13   | 0.000054 | -5.392697  |  |
| 11889 | Dysplasia | MESP2     | 0.000034 | -5.381215  |  |
| 11890 | Dysplasia | NR5A2     | 0.000001 | -5.359415  |  |
| 11891 | Dysplasia | FAM150B   | 0.000003 | -5.356415  |  |
| 11892 | Dysplasia | FIGN      | 0.000032 | -5.328371  |  |
| 11893 | Dysplasia | PAPPA     | 0.000031 | -5.221384  |  |
| 11894 | Dysplasia | FN1       | 0.000045 | -5.179577  |  |
| 11895 | Dysplasia | LRRN2     | 0.000004 | -5.114688  |  |
| 11896 | Dysplasia | GPRC5B    | 0.000054 | -5.056463  |  |
| 11897 | Dysplasia | IGF1      | 0        | -5.019269  |  |
| 11898 | Dysplasia | KIAA2022  | 0.000001 | -4.891469  |  |

|       |           |          |          |           |  |
|-------|-----------|----------|----------|-----------|--|
| 11899 | Dysplasia | TMEM72   | 0.000001 | -4.884725 |  |
| 11900 | Dysplasia | INSM1    | 0        | -4.88269  |  |
| 11901 | Dysplasia | ABCA8    | 0.000001 | -4.762877 |  |
| 11902 | Dysplasia | SECTM1   | 0.000043 | -4.703083 |  |
| 11903 | Dysplasia | CLIP3    | 0.000019 | -4.692329 |  |
| 11904 | Dysplasia | HHLA2    | 0.000005 | -4.674398 |  |
| 11905 | Dysplasia | CD36     | 0.000005 | -4.6646   |  |
| 11906 | Dysplasia | SCARA5   | 0.000025 | -4.659075 |  |
| 11907 | Dysplasia | SCG2     | 0        | -4.649106 |  |
| 11908 | Dysplasia | RDX      | 0.000005 | -4.580242 |  |
| 11909 | Dysplasia | HAPLN1   | 0.000008 | -4.558387 |  |
| 11910 | Dysplasia | DPP4     | 0.000066 | -4.500848 |  |
| 11911 | Dysplasia | PCDH9    | 0        | -4.498007 |  |
| 11912 | Dysplasia | MYOT     | 0.000002 | -4.483537 |  |
| 11913 | Dysplasia | FLJ36848 | 0.000032 | -4.481406 |  |
| 11914 | Dysplasia | TUSC3    | 0.000001 | -4.451097 |  |
| 11915 | Dysplasia | CD1D     | 0.000006 | -4.435071 |  |
| 11916 | Dysplasia | FAM132A  | 0.000022 | -4.373596 |  |
| 11917 | Dysplasia | C11orf96 | 0.000082 | -4.344237 |  |
| 11918 | Dysplasia | HMOX1    | 0.000006 | -4.31922  |  |
| 11919 | Dysplasia | SPIB     | 0        | -4.317744 |  |
| 11920 | Dysplasia | PRKAR2B  | 0.000005 | -4.287648 |  |
| 11921 | Dysplasia | GNG2     | 0.000015 | -4.266163 |  |
| 11922 | Dysplasia | PCK1     | 0        | -4.260282 |  |
| 11923 | Dysplasia | HIST1H1C | 0.000005 | -4.183722 |  |
| 11924 | Dysplasia | GPM6B    | 0        | -4.161942 |  |
| 11925 | Dysplasia | PLP1     | 0.000004 | -4.115264 |  |
| 11926 | Dysplasia | RGS2     | 0.000028 | -4.115168 |  |
| 11927 | Dysplasia | AXL      | 0.000036 | -4.105729 |  |
| 11928 | Dysplasia | SDC3     | 0.000082 | -4.088098 |  |
| 11929 | Dysplasia | MEIS1    | 0        | -4.074388 |  |
| 11930 | Dysplasia | CD48     | 0.000082 | -4.071704 |  |
| 11931 | Dysplasia | SEMA6A   | 0.000004 | -4.015729 |  |
| 11932 | Dysplasia | SLC9A9   | 0.000001 | -3.986887 |  |
| 11933 | Dysplasia | GPX3     | 0.000015 | -3.976098 |  |
| 11934 | Dysplasia | DPT      | 0        | -3.964112 |  |
| 11935 | Dysplasia | RARRES2  | 0.000004 | -3.962436 |  |
| 11936 | Dysplasia | MPEG1    | 0.000003 | -3.942707 |  |
| 11937 | Dysplasia | SCN7A    | 0.000001 | -3.937932 |  |
| 11938 | Dysplasia | LOX      | 0.000043 | -3.915415 |  |
| 11939 | Dysplasia | SPARCL1  | 0.000024 | -3.888472 |  |
| 11940 | Dysplasia | LIFR     | 0.000039 | -3.882601 |  |
| 11941 | Dysplasia | FGL2     | 0.000025 | -3.87092  |  |
| 11942 | Dysplasia | GNG11    | 0.000054 | -3.848307 |  |
| 11943 | Dysplasia | ECM2     | 0.00009  | -3.801265 |  |
| 11944 | Dysplasia | HDGFRP3  | 0.00009  | -3.781041 |  |
| 11945 | Dysplasia | XKR4     | 0.000001 | -3.770258 |  |
| 11946 | Dysplasia | NRXN1    | 0.000002 | -3.768761 |  |
| 11947 | Dysplasia | SEMA3E   | 0.000001 | -3.749221 |  |
| 11948 | Dysplasia | LY9      | 0.000072 | -3.719374 |  |

|       |           |              |          |           |  |
|-------|-----------|--------------|----------|-----------|--|
| 11949 | Dysplasia | EVI2B        | 0.000071 | -3.698574 |  |
| 11950 | Dysplasia | ZNF75A       | 0        | -3.693634 |  |
| 11951 | Dysplasia | HIGD1A       | 0.000009 | -3.688449 |  |
| 11952 | Dysplasia | CPM          | 0.000065 | -3.663781 |  |
| 11953 | Dysplasia | RHOF         | 0.000004 | -3.660494 |  |
| 11954 | Dysplasia | NEU4         | 0.000076 | -3.65104  |  |
| 11955 | Dysplasia | MCC          | 0.000021 | -3.64725  |  |
| 11956 | Dysplasia | HMCN1        | 0.000082 | -3.643733 |  |
| 11957 | Dysplasia | MRC1         | 0.000037 | -3.622318 |  |
| 11958 | Dysplasia | LOC646701    | 0.000082 | -3.621953 |  |
| 11959 | Dysplasia | TPK1         | 0.000016 | -3.612082 |  |
| 11960 | Dysplasia | KIF16B       | 0.000001 | -3.576707 |  |
| 11961 | Dysplasia | CLIC5        | 0.000033 | -3.544831 |  |
| 11962 | Dysplasia | CD163        | 0.000054 | -3.537225 |  |
| 11963 | Dysplasia | NEURL3       | 0.000006 | -3.521461 |  |
| 11964 | Dysplasia | VCAM1        | 0.000091 | -3.475122 |  |
| 11965 | Dysplasia | IL1R1        | 0.000025 | -3.461987 |  |
| 11966 | Dysplasia | CLEC10A      | 0.000005 | -3.459407 |  |
| 11967 | Dysplasia | HLA-DRB1     | 0.00008  | -3.452479 |  |
| 11968 | Dysplasia | ESR1         | 0.000054 | -3.434047 |  |
| 11969 | Dysplasia | AHRR         | 0.000075 | -3.424512 |  |
| 11970 | Dysplasia | CD14         | 0.000013 | -3.41472  |  |
| 11971 | Dysplasia | MFAP4        | 0        | -3.393558 |  |
| 11972 | Dysplasia | AIF1         | 0.000082 | -3.388451 |  |
| 11973 | Dysplasia | SLC17A4      | 0.000002 | -3.387147 |  |
| 11974 | Dysplasia | GIMAP6       | 0.000036 | -3.387008 |  |
| 11975 | Dysplasia | KCTD12       | 0.00001  | -3.361388 |  |
| 11976 | Dysplasia | SRPX         | 0.000007 | -3.357829 |  |
| 11977 | Dysplasia | FBLN1        | 0        | -3.352787 |  |
| 11978 | Dysplasia | SMPDL3A      | 0.000025 | -3.352141 |  |
| 11979 | Dysplasia | NOVA1        | 0.000072 | -3.351954 |  |
| 11980 | Dysplasia | PAMR1        | 0.000002 | -3.31603  |  |
| 11981 | Dysplasia | SAMD9        | 0.000058 | -3.312558 |  |
| 11982 | Dysplasia | RCAN1        | 0.000031 | -3.300913 |  |
| 11983 | Dysplasia | UPP1         | 0.000072 | -3.293296 |  |
| 11984 | Dysplasia | SLC20A1      | 0.000031 | -3.292437 |  |
| 11985 | Dysplasia | NCF4         | 0.000022 | -3.282698 |  |
| 11986 | Dysplasia | AKAP2        | 0.000068 | -3.231506 |  |
| 11987 | Dysplasia | CMAH         | 0        | -3.208679 |  |
| 11988 | Dysplasia | MEF2C        | 0.000019 | -3.189628 |  |
| 11989 | Dysplasia | CCNYL1       | 0.000005 | -3.18485  |  |
| 11990 | Dysplasia | LOC100508909 | 0.000004 | -3.147079 |  |
| 11991 | Dysplasia | HLF          | 0.000001 | -3.135844 |  |
| 11992 | Dysplasia | CNTN1        | 0.000002 | -3.122925 |  |
| 11993 | Dysplasia | DNASE1L3     | 0.000027 | -3.119775 |  |
| 11994 | Dysplasia | PHLPP2       | 0.000001 | -3.096838 |  |
| 11995 | Dysplasia | NKX2-3       | 0.000074 | -3.096098 |  |
| 11996 | Dysplasia | SLC46A3      | 0        | -3.09383  |  |
| 11997 | Dysplasia | CXCL12       | 0.000005 | -3.092806 |  |
| 11998 | Dysplasia | MMP2         | 0.000043 | -3.089364 |  |

|       |           |              |          |           |  |
|-------|-----------|--------------|----------|-----------|--|
| 11999 | Dysplasia | GPC6         | 0.000002 | -3.072173 |  |
| 12000 | Dysplasia | CCL14        | 0.000017 | -3.067341 |  |
| 12001 | Dysplasia | MAF          | 0.000048 | -3.067136 |  |
| 12002 | Dysplasia | PDGFRA       | 0        | -3.06471  |  |
| 12003 | Dysplasia | TRAF3IP3     | 0.000031 | -3.059537 |  |
| 12004 | Dysplasia | CCL28        | 0.000005 | -3.053933 |  |
| 12005 | Dysplasia | HIP1         | 0.000051 | -3.001035 |  |
| 12006 | Dysplasia | MAFB         | 0.000031 | -2.981246 |  |
| 12007 | Dysplasia | AKT3         | 0.00001  | -2.971808 |  |
| 12008 | Dysplasia | HPSE         | 0.000018 | -2.95219  |  |
| 12009 | Dysplasia | GJB2         | 0.000007 | -2.946941 |  |
| 12010 | Dysplasia | LOC100506621 | 0.000001 | -2.922869 |  |
| 12011 | Dysplasia | SOX10        | 0.000003 | -2.909432 |  |
| 12012 | Dysplasia | ELOVL6       | 0.000025 | -2.895058 |  |
| 12013 | Dysplasia | RUNDC3B      | 0.000008 | -2.875203 |  |
| 12014 | Dysplasia | CLCN2        | 0.000002 | -2.858268 |  |
| 12015 | Dysplasia | RAB34        | 0.000006 | -2.849977 |  |
| 12016 | Dysplasia | SGK1         | 0        | -2.849016 |  |
| 12017 | Dysplasia | ITGA8        | 0.000005 | -2.847531 |  |
| 12018 | Dysplasia | SCD5         | 0.000011 | -2.844648 |  |
| 12019 | Dysplasia | STAB1        | 0        | -2.839099 |  |
| 12020 | Dysplasia | FOXF1        | 0.000035 | -2.838865 |  |
| 12021 | Dysplasia | ZNF677       | 0        | -2.838379 |  |
| 12022 | Dysplasia | SLC36A1      | 0.000001 | -2.838295 |  |
| 12023 | Dysplasia | TNXA         | 0        | -2.832863 |  |
| 12024 | Dysplasia | CSF1R        | 0.000019 | -2.829504 |  |
| 12025 | Dysplasia | CTSZ         | 0.000004 | -2.829326 |  |
| 12026 | Dysplasia | AHCYL2       | 0.000019 | -2.820278 |  |
| 12027 | Dysplasia | TCF4         | 0.000003 | -2.812337 |  |
| 12028 | Dysplasia | UNC5C        | 0        | -2.801776 |  |
| 12029 | Dysplasia | MS4A7        | 0.000046 | -2.800661 |  |
| 12030 | Dysplasia | PPP1R16B     | 0.000034 | -2.800474 |  |
| 12031 | Dysplasia | GGTA1        | 0.000004 | -2.796653 |  |
| 12032 | Dysplasia | JAZF1        | 0.000002 | -2.794106 |  |
| 12033 | Dysplasia | RGL1         | 0.000069 | -2.783913 |  |
| 12034 | Dysplasia | CNRIP1       | 0.000031 | -2.778322 |  |
| 12035 | Dysplasia | PTGER3       | 0.000005 | -2.766417 |  |
| 12036 | Dysplasia | TNXB         | 0        | -2.759854 |  |
| 12037 | Dysplasia | FAM101B      | 0.000016 | -2.705595 |  |
| 12038 | Dysplasia | RELL1        | 0.000001 | -2.704754 |  |
| 12039 | Dysplasia | ADCY2        | 0        | -2.684973 |  |
| 12040 | Dysplasia | RASGRP3      | 0.000007 | -2.665974 |  |
| 12041 | Dysplasia | JAM3         | 0.000012 | -2.658057 |  |
| 12042 | Dysplasia | FAM38B       | 0        | -2.654328 |  |
| 12043 | Dysplasia | SMPD1        | 0.000052 | -2.647116 |  |
| 12044 | Dysplasia | ARMCX1       | 0.000019 | -2.616212 |  |
| 12045 | Dysplasia | ADAP2        | 0.000031 | -2.598393 |  |
| 12046 | Dysplasia | PLOD2        | 0        | -2.597071 |  |
| 12047 | Dysplasia | PEG3         | 0.000003 | -2.596887 |  |
| 12048 | Dysplasia | COL28A1      | 0.000001 | -2.595261 |  |

|       |           |              |          |           |  |
|-------|-----------|--------------|----------|-----------|--|
| 12049 | Dysplasia | PRDX6        | 0.000015 | -2.590845 |  |
| 12050 | Dysplasia | ANTXR1       | 0.000039 | -2.588072 |  |
| 12051 | Dysplasia | GIMAP1       | 0.000037 | -2.576192 |  |
| 12052 | Dysplasia | ABCA6        | 0.000001 | -2.55698  |  |
| 12053 | Dysplasia | MYO5A        | 0.000048 | -2.556934 |  |
| 12054 | Dysplasia | FOLR2        | 0.000043 | -2.529423 |  |
| 12055 | Dysplasia | FOXF2        | 0.000023 | -2.529215 |  |
| 12056 | Dysplasia | PTN          | 0        | -2.525943 |  |
| 12057 | Dysplasia | PCDH18       | 0.000016 | -2.525923 |  |
| 12058 | Dysplasia | SLC30A4      | 0.000003 | -2.513062 |  |
| 12059 | Dysplasia | CD84         | 0.000019 | -2.50676  |  |
| 12060 | Dysplasia | KRT20        | 0.000067 | -2.501505 |  |
| 12061 | Dysplasia | RELN         | 0.000002 | -2.493594 |  |
| 12062 | Dysplasia | CCDC80       | 0.000001 | -2.493379 |  |
| 12063 | Dysplasia | LAPTM5       | 0.000074 | -2.486932 |  |
| 12064 | Dysplasia | TLCD2        | 0.000008 | -2.481418 |  |
| 12065 | Dysplasia | SALL1        | 0.000009 | -2.477997 |  |
| 12066 | Dysplasia | GLTP         | 0.000002 | -2.471048 |  |
| 12067 | Dysplasia | FZD8         | 0.000042 | -2.467017 |  |
| 12068 | Dysplasia | TSPAN3       | 0.000007 | -2.46009  |  |
| 12069 | Dysplasia | CYS1         | 0.000004 | -2.42959  |  |
| 12070 | Dysplasia | TTC22        | 0.000079 | -2.427972 |  |
| 12071 | Dysplasia | SHE          | 0.000029 | -2.413364 |  |
| 12072 | Dysplasia | ZCCHC24      | 0.000026 | -2.410483 |  |
| 12073 | Dysplasia | OLFML2A      | 0.000002 | -2.402962 |  |
| 12074 | Dysplasia | SALL2        | 0.000034 | -2.388978 |  |
| 12075 | Dysplasia | RBMS3        | 0.000048 | -2.379696 |  |
| 12076 | Dysplasia | ARHGEF6      | 0.000017 | -2.377721 |  |
| 12077 | Dysplasia | CACNA2D1     | 0.000005 | -2.366345 |  |
| 12078 | Dysplasia | GAS7         | 0        | -2.331612 |  |
| 12079 | Dysplasia | FXYD1        | 0.000004 | -2.320937 |  |
| 12080 | Dysplasia | HSPC159      | 0.000034 | -2.315064 |  |
| 12081 | Dysplasia | SLC2A13      | 0.000036 | -2.311299 |  |
| 12082 | Dysplasia | TMEM133      | 0.000005 | -2.302401 |  |
| 12083 | Dysplasia | CLEC3B       | 0.000002 | -2.301045 |  |
| 12084 | Dysplasia | PPP1R3C      | 0.000007 | -2.298722 |  |
| 12085 | Dysplasia | HDAC9        | 0.000002 | -2.293507 |  |
| 12086 | Dysplasia | MIER3        | 0.000002 | -2.292537 |  |
| 12087 | Dysplasia | ITPKA        | 0.000008 | -2.28995  |  |
| 12088 | Dysplasia | SPPL2A       | 0.000001 | -2.288713 |  |
| 12089 | Dysplasia | IGSF9        | 0.000003 | -2.288617 |  |
| 12090 | Dysplasia | NAP1L3       | 0.000007 | -2.269711 |  |
| 12091 | Dysplasia | LOC100509683 | 0.000054 | -2.268836 |  |
| 12092 | Dysplasia | ITM2C        | 0.000036 | -2.26781  |  |
| 12093 | Dysplasia | PDE2A        | 0        | -2.25433  |  |
| 12094 | Dysplasia | THBS1        | 0.000001 | -2.250588 |  |
| 12095 | Dysplasia | NAAA         | 0.000004 | -2.241022 |  |
| 12096 | Dysplasia | SYNC         | 0        | -2.233029 |  |
| 12097 | Dysplasia | ZNF542       | 0.000001 | -2.229413 |  |
| 12098 | Dysplasia | ANKRD6       | 0.000007 | -2.224363 |  |

|       |           |          |          |           |  |
|-------|-----------|----------|----------|-----------|--|
| 12099 | Dysplasia | ST3GAL6  | 0.000007 | -2.217513 |  |
| 12100 | Dysplasia | C15orf48 | 0.000019 | -2.215116 |  |
| 12101 | Dysplasia | OLFML1   | 0.000001 | -2.200346 |  |
| 12102 | Dysplasia | TSPAN4   | 0.000036 | -2.182007 |  |
| 12103 | Dysplasia | SLCO2A1  | 0.000048 | -2.17587  |  |
| 12104 | Dysplasia | XIAP     | 0.00003  | -2.166723 |  |
| 12105 | Dysplasia | APOE     | 0.000002 | -2.157823 |  |
| 12106 | Dysplasia | OSTM1    | 0.000001 | -2.15371  |  |
| 12107 | Dysplasia | C2orf7   | 0.000003 | -2.142112 |  |
| 12108 | Dysplasia | UBE2E2   | 0        | -2.140143 |  |
| 12109 | Dysplasia | BCAP29   | 0.000079 | -2.114582 |  |
| 12110 | Dysplasia | PIP5K1B  | 0.000059 | -2.11295  |  |
| 12111 | Dysplasia | PER3     | 0.000003 | -2.111868 |  |
| 12112 | Dysplasia | CFH      | 0.000001 | -2.107982 |  |
| 12113 | Dysplasia | PDE1A    | 0.000005 | -2.095001 |  |
| 12114 | Dysplasia | 8-Sep    | 0        | -2.09136  |  |
| 12115 | Dysplasia | FAM126A  | 0.000001 | -2.078326 |  |
| 12116 | Dysplasia | GLI3     | 0        | -2.077675 |  |
| 12117 | Dysplasia | BCL2L11  | 0.000002 | -2.076004 |  |
| 12118 | Dysplasia | MYLK     | 0.000001 | -2.068345 |  |
| 12119 | Dysplasia | FUCA1    | 0.000083 | -2.063597 |  |
| 12120 | Dysplasia | PDLIM2   | 0        | -2.062956 |  |
| 12121 | Dysplasia | CNNM2    | 0        | -2.062836 |  |
| 12122 | Dysplasia | CES2     | 0.000004 | -2.059435 |  |
| 12123 | Dysplasia | PEX26    | 0.000003 | -2.0586   |  |
| 12124 | Dysplasia | MOBKL2B  | 0.000001 | -2.057892 |  |
| 12125 | Dysplasia | GPD2     | 0.000027 | -2.05634  |  |
| 12126 | Dysplasia | CNNM4    | 0.000002 | -2.047069 |  |
| 12127 | Dysplasia | UGP2     | 0.000015 | -2.045593 |  |
| 12128 | Dysplasia | ARNTL    | 0.000073 | -2.04229  |  |
| 12129 | Dysplasia | MYO15B   | 0.000082 | -2.0422   |  |
| 12130 | Dysplasia | TNS1     | 0.000002 | -2.039982 |  |
| 12131 | Dysplasia | FAS      | 0.000076 | -2.038597 |  |
| 12132 | Dysplasia | FXYD6    | 0        | -2.037228 |  |
| 12133 | Dysplasia | ANKRD13A | 0.000007 | -2.030677 |  |
| 12134 | Dysplasia | CYGB     | 0        | -2.028863 |  |
| 12135 | Dysplasia | ZNF304   | 0        | -2.023245 |  |
| 12136 | Dysplasia | CPEB3    | 0.000056 | -2.001948 |  |
| 12137 | Dysplasia | FERMT1   | 0.000003 | 2.006067  |  |
| 12138 | Dysplasia | STXBP6   | 0        | 2.00751   |  |
| 12139 | Dysplasia | ME3      | 0.000002 | 2.043797  |  |
| 12140 | Dysplasia | APIP     | 0.000003 | 2.055785  |  |
| 12141 | Dysplasia | S100P    | 0.000008 | 2.06215   |  |
| 12142 | Dysplasia | NEBL     | 0.000002 | 2.150993  |  |
| 12143 | Dysplasia | C19orf45 | 0.000004 | 2.234818  |  |
| 12144 | Dysplasia | BACE2    | 0        | 2.270814  |  |
| 12145 | Dysplasia | CCDC123  | 0.00005  | 2.300184  |  |
| 12146 | Dysplasia | SAMD5    | 0.000007 | 2.332025  |  |
| 12147 | Dysplasia | QTRT1    | 0.000082 | 2.345266  |  |
| 12148 | Dysplasia | RNF183   | 0.000008 | 2.570806  |  |

|       |                        |          |          |           |  |
|-------|------------------------|----------|----------|-----------|--|
| 12149 | Dysplasia              | CRB2     | 0        | 2.774161  |  |
| 12150 | Dysplasia              | AXIN2    | 0.000003 | 2.846909  |  |
| 12151 | Dysplasia              | HOXA10   | 0.000013 | 2.919364  |  |
| 12152 | Dysplasia              | IGFBP2   | 0.000006 | 3.15496   |  |
| 12153 | Dysplasia              | ASB4     | 0.000032 | 3.317859  |  |
| 12154 | Dysplasia              | ETV4     | 0        | 3.658835  |  |
| 12155 | Electromagnetic Energy | REG1B    | 0.000008 | -9.377253 |  |
| 12156 | Electromagnetic Energy | CLCA4    | 0        | -7.004552 |  |
| 12157 | Electromagnetic Energy | MS4A12   | 0.000013 | -6.113246 |  |
| 12158 | Electromagnetic Energy | CEACAM7  | 0.000004 | -4.815933 |  |
| 12159 | Electromagnetic Energy | SI       | 0.000013 | -4.602946 |  |
| 12160 | Electromagnetic Energy | SLC26A3  | 0.000001 | -4.120587 |  |
| 12161 | Electromagnetic Energy | ASCL2    | 0.000004 | -4.090253 |  |
| 12162 | Electromagnetic Energy | KLK10    | 0.000074 | -3.447447 |  |
| 12163 | Electromagnetic Energy | C10orf99 | 0        | -3.417173 |  |
| 12164 | Electromagnetic Energy | CA4      | 0.000027 | -3.322223 |  |
| 12165 | Electromagnetic Energy | PI3      | 0.000053 | -3.20333  |  |
| 12166 | Electromagnetic Energy | DMBT1    | 0.000005 | -3.158941 |  |
| 12167 | Electromagnetic Energy | BTNL8    | 0.00003  | -3.143397 |  |
| 12168 | Electromagnetic Energy | GAD1     | 0        | -3.131845 |  |
| 12169 | Electromagnetic Energy | GRM8     | 0.000021 | -3.036762 |  |
| 12170 | Electromagnetic Energy | SEMG1    | 0.000096 | -3.02247  |  |
| 12171 | Electromagnetic Energy | GPA33    | 0.000133 | -2.970294 |  |
| 12172 | Electromagnetic Energy | ETV4     | 0        | -2.956175 |  |
| 12173 | Electromagnetic Energy | HOXA10   | 0.000001 | -2.927409 |  |
| 12174 | Electromagnetic Energy | PPP1R1B  | 0.000003 | -2.925221 |  |
| 12175 | Electromagnetic Energy | PLAC8    | 0        | -2.869226 |  |
| 12176 | Electromagnetic Energy | GCNT3    | 0.000031 | -2.818528 |  |
| 12177 | Electromagnetic Energy | HSD11B2  | 0.000006 | -2.758098 |  |
| 12178 | Electromagnetic Energy | ACE2     | 0        | -2.703972 |  |
| 12179 | Electromagnetic Energy | AFAP1-AS | 0        | -2.656585 |  |
| 12180 | Electromagnetic Energy | GAL3ST1  | 0        | -2.642896 |  |
| 12181 | Electromagnetic Energy | GJB5     | 0        | -2.619622 |  |
| 12182 | Electromagnetic Energy | SLC26A2  | 0.000004 | -2.572697 |  |
| 12183 | Electromagnetic Energy | ACSL6    | 0        | -2.558908 |  |
| 12184 | Electromagnetic Energy | CBLC     | 0.000087 | -2.553178 |  |
| 12185 | Electromagnetic Energy | LRRC19   | 0.000013 | -2.544712 |  |
| 12186 | Electromagnetic Energy | OSTBETA  | 0.000016 | -2.541604 |  |
| 12187 | Electromagnetic Energy | PRR15    | 0        | -2.516785 |  |
| 12188 | Electromagnetic Energy | HR       | 0.000005 | -2.516208 |  |
| 12189 | Electromagnetic Energy | PLA2G10  | 0.000004 | -2.461758 |  |
| 12190 | Electromagnetic Energy | SLC13A2  | 0.000004 | -2.460392 |  |
| 12191 | Electromagnetic Energy | UGT8     | 0.000131 | -2.430706 |  |
| 12192 | Electromagnetic Energy | HHLA2    | 0.000001 | -2.426586 |  |
| 12193 | Electromagnetic Energy | NOX1     | 0.000123 | -2.424593 |  |
| 12194 | Electromagnetic Energy | EPN3     | 0.000101 | -2.407784 |  |
| 12195 | Electromagnetic Energy | PRSS3    | 0.000011 | -2.399846 |  |
| 12196 | Electromagnetic Energy | TRPM6    | 0.000047 | -2.38064  |  |
| 12197 | Electromagnetic Energy | ROBO2    | 0.000131 | -2.373002 |  |
| 12198 | Electromagnetic Energy | CDX1     | 0.000121 | -2.362139 |  |

|       |                        |              |          |           |  |
|-------|------------------------|--------------|----------|-----------|--|
| 12199 | Electromagnetic Energy | XK           | 0.000009 | -2.360366 |  |
| 12200 | Electromagnetic Energy | PLEKHA6      | 0.000038 | -2.355337 |  |
| 12201 | Electromagnetic Energy | HPDL         | 0.000137 | -2.329338 |  |
| 12202 | Electromagnetic Energy | IHH          | 0.000002 | -2.327418 |  |
| 12203 | Electromagnetic Energy | GPX2         | 0.00004  | -2.31021  |  |
| 12204 | Electromagnetic Energy | CLDN2        | 0.000009 | -2.291243 |  |
| 12205 | Electromagnetic Energy | RAPGEFL1     | 0.000308 | -2.288837 |  |
| 12206 | Electromagnetic Energy | HOXA13       | 0.000002 | -2.285029 |  |
| 12207 | Electromagnetic Energy | ZG16B        | 0.000092 | -2.280213 |  |
| 12208 | Electromagnetic Energy | CKMT1A       | 0.000115 | -2.276833 |  |
| 12209 | Electromagnetic Energy | PKP2         | 0.000008 | -2.26335  |  |
| 12210 | Electromagnetic Energy | ITPKA        | 0.000006 | -2.261717 |  |
| 12211 | Electromagnetic Energy | PRSS1        | 0        | -2.261085 |  |
| 12212 | Electromagnetic Energy | TMEM54       | 0.000032 | -2.249464 |  |
| 12213 | Electromagnetic Energy | CDH17        | 0.00014  | -2.241173 |  |
| 12214 | Electromagnetic Energy | PLEK2        | 0.000022 | -2.237062 |  |
| 12215 | Electromagnetic Energy | CDC45        | 0.000219 | -2.210318 |  |
| 12216 | Electromagnetic Energy | GIPC2        | 0.0001   | -2.203936 |  |
| 12217 | Electromagnetic Energy | NOS2         | 0.000008 | -2.193151 |  |
| 12218 | Electromagnetic Energy | SCIN         | 0        | -2.191931 |  |
| 12219 | Electromagnetic Energy | SELENBP1     | 0.000183 | -2.187424 |  |
| 12220 | Electromagnetic Energy | LOC100505633 | 0.000266 | -2.184313 |  |
| 12221 | Electromagnetic Energy | HOXA5        | 0        | -2.174766 |  |
| 12222 | Electromagnetic Energy | PRSS12       | 0.000066 | -2.167532 |  |
| 12223 | Electromagnetic Energy | SFN          | 0.000168 | -2.167506 |  |
| 12224 | Electromagnetic Energy | GGT6         | 0.00013  | -2.164095 |  |
| 12225 | Electromagnetic Energy | ARHGAP8      | 0.000121 | -2.145479 |  |
| 12226 | Electromagnetic Energy | DSC3         | 0.000105 | -2.13763  |  |
| 12227 | Electromagnetic Energy | LOC400573    | 0.000006 | -2.13572  |  |
| 12228 | Electromagnetic Energy | LRRC31       | 0.000138 | -2.12492  |  |
| 12229 | Electromagnetic Energy | LOC729680    | 0.000005 | -2.124049 |  |
| 12230 | Electromagnetic Energy | PITX1        | 0.000128 | -2.113922 |  |
| 12231 | Electromagnetic Energy | C16orf53     | 0.000145 | -2.110319 |  |
| 12232 | Electromagnetic Energy | PLS1         | 0.000089 | -2.108095 |  |
| 12233 | Electromagnetic Energy | TPX2         | 0.000007 | -2.099725 |  |
| 12234 | Electromagnetic Energy | STYK1        | 0.000053 | -2.099148 |  |
| 12235 | Electromagnetic Energy | ADAP1        | 0        | -2.09866  |  |
| 12236 | Electromagnetic Energy | BCL2L15      | 0.000013 | -2.096901 |  |
| 12237 | Electromagnetic Energy | ESRP1        | 0.000046 | -2.096632 |  |
| 12238 | Electromagnetic Energy | ANLN         | 0.000004 | -2.091956 |  |
| 12239 | Electromagnetic Energy | CEACAM1      | 0.000011 | -2.086042 |  |
| 12240 | Electromagnetic Energy | YBX2         | 0.000065 | -2.081157 |  |
| 12241 | Electromagnetic Energy | HKDC1        | 0.000075 | -2.080243 |  |
| 12242 | Electromagnetic Energy | CDCA3        | 0.000001 | -2.079912 |  |
| 12243 | Electromagnetic Energy | BCL2L14      | 0.000213 | -2.078232 |  |
| 12244 | Electromagnetic Energy | NCAPH        | 0.000073 | -2.072185 |  |
| 12245 | Electromagnetic Energy | ARHGAP32     | 0.000001 | -2.070218 |  |
| 12246 | Electromagnetic Energy | C15orf48     | 0.000112 | -2.06679  |  |
| 12247 | Electromagnetic Energy | FXYD3        | 0        | -2.064529 |  |
| 12248 | Electromagnetic Energy | PLK1         | 0.000002 | -2.064204 |  |



|       |                              |           |          |            |  |
|-------|------------------------------|-----------|----------|------------|--|
| 12249 | Electromagnetic Energy       | TTC22     | 0.000212 | -2.060377  |  |
| 12250 | Electromagnetic Energy       | GRHL2     | 0.00002  | -2.05978   |  |
| 12251 | Electromagnetic Energy       | KLF5      | 0.000151 | -2.049687  |  |
| 12252 | Electromagnetic Energy       | TRIM2     | 0.000011 | -2.045956  |  |
| 12253 | Electromagnetic Energy       | SATB2     | 0.000201 | -2.042722  |  |
| 12254 | Electromagnetic Energy       | LAD1      | 0.000023 | -2.040375  |  |
| 12255 | Electromagnetic Energy       | C1orf106  | 0.000021 | -2.038333  |  |
| 12256 | Electromagnetic Energy       | MYO1A     | 0.000026 | -2.032036  |  |
| 12257 | Electromagnetic Energy       | KBTBD11   | 0.00003  | -2.031752  |  |
| 12258 | Electromagnetic Energy       | PRSS8     | 0.000014 | -2.015174  |  |
| 12259 | Electromagnetic Energy       | CDCA7     | 0.000114 | -2.01385   |  |
| 12260 | Electromagnetic Energy       | KIAA1244  | 0.000241 | -2.011288  |  |
| 12261 | Electromagnetic Energy       | FERMT1    | 0.000065 | -2.002065  |  |
| 12262 | Electromagnetic Energy       | NRARP     | 0.000219 | -2.001723  |  |
| 12263 | Encounter due to therapy     | LOC158257 | 0        | 2.23664    |  |
| 12264 | Encounter due to therapy     | RPS11     | 0        | 2.266291   |  |
| 12265 | Esophagus normal             | MVP       | 0.000004 | 3.215099   |  |
| 12266 | Esophagus normal             | TOR1AIP2  | 0        | 3.858727   |  |
| 12267 | Esophagus normal             | ANKRD11   | 0        | 3.92099    |  |
| 12268 | Esophagus normal             | KRT37     | 0.000086 | 4.070831   |  |
| 12269 | Esophagus normal             | ZNF133    | 0        | 15.289034  |  |
| 12270 | Fecal analysis procedure     | TNNT1     | 0.018468 | -3.240378  |  |
| 12271 | Fecal analysis procedure     | KRT7      | 0.027034 | -3.045607  |  |
| 12272 | Fecal analysis procedure     | GALNT14   | 0.041388 | -2.245997  |  |
| 12273 | Fecal analysis procedure     | KLHL14    | 0.038715 | -2.111714  |  |
| 12274 | Fecal analysis procedure     | MAP2      | 0.02749  | -2.035409  |  |
| 12275 | Fecal analysis procedure     | TFAP2A    | 0.022418 | -2.009505  |  |
| 12276 | Fecal analysis procedure     | PRAC      | 0.010821 | 2.388571   |  |
| 12277 | Finding                      | ACBD3     | 0.007851 | -3.97229   |  |
| 12278 | Finding                      | KRTAP5-5  | 0.007148 | -3.883056  |  |
| 12279 | Finding                      | HLA-C     | 0.006669 | -3.673555  |  |
| 12280 | Finding                      | ROBO2     | 0.00448  | -3.662034  |  |
| 12281 | Finding                      | HLA-DQB1  | 0.006388 | -2.89817   |  |
| 12282 | Finding                      | NCOA4     | 0.005756 | -2.70302   |  |
| 12283 | Finding                      | PALLD     | 0.005369 | -2.534954  |  |
| 12284 | Finding                      | CHUK      | 0.00462  | -2.466915  |  |
| 12285 | Follicular thyroid carcinoma | TPST2     | 0.000258 | 2.332694   |  |
| 12286 | Genotype determination       | AASS      | 0.010138 | -23.946618 |  |
| 12287 | Genotype determination       | CSTA      | 0.006426 | -8.88579   |  |
| 12288 | Genotype determination       | EPHX2     | 0.007544 | -7.162683  |  |
| 12289 | Genotype determination       | SERPINA5  | 0.005197 | -7.134192  |  |
| 12290 | Genotype determination       | MXD3      | 0.005664 | -7.132956  |  |
| 12291 | Genotype determination       | ANK1      | 0.014933 | -7.057954  |  |
| 12292 | Genotype determination       | SPARC     | 0.005664 | -5.955613  |  |
| 12293 | Genotype determination       | JMJD7     | 0.013483 | -5.71994   |  |
| 12294 | Genotype determination       | SLC7A11   | 0.004009 | -5.464161  |  |
| 12295 | Genotype determination       | C9orf3    | 0.005581 | -4.750239  |  |
| 12296 | Genotype determination       | PCSK9     | 0.013483 | -4.566219  |  |
| 12297 | Genotype determination       | INSIG1    | 0.003757 | -4.271521  |  |
| 12298 | Genotype determination       | SLC16A6   | 0.009601 | -4.260433  |  |

|       |                        |            |          |           |  |
|-------|------------------------|------------|----------|-----------|--|
| 12299 | Genotype determination | DNM3       | 0.003938 | -4.000693 |  |
| 12300 | Genotype determination | SLC1A3     | 0.003757 | -3.704426 |  |
| 12301 | Genotype determination | STARD4     | 0.003757 | -3.664204 |  |
| 12302 | Genotype determination | NES        | 0.020473 | -3.647101 |  |
| 12303 | Genotype determination | VSNL1      | 0.004402 | -3.632594 |  |
| 12304 | Genotype determination | NR1D1      | 0.019914 | -3.591285 |  |
| 12305 | Genotype determination | ZNF238     | 0.014933 | -3.507031 |  |
| 12306 | Genotype determination | CCDC88B    | 0.009162 | -3.503993 |  |
| 12307 | Genotype determination | CCNG2      | 0.014919 | -3.333991 |  |
| 12308 | Genotype determination | UCA1       | 0.003757 | -3.327641 |  |
| 12309 | Genotype determination | LIPG       | 0.0077   | -3.293223 |  |
| 12310 | Genotype determination | NCRNA00182 | 0.016461 | -3.214847 |  |
| 12311 | Genotype determination | LOC285735  | 0.007699 | -3.014147 |  |
| 12312 | Genotype determination | NEURL1B    | 0.014096 | -3.006844 |  |
| 12313 | Genotype determination | PHF20      | 0.020375 | -2.964934 |  |
| 12314 | Genotype determination | HSPB8      | 0.019557 | -2.864434 |  |
| 12315 | Genotype determination | OGFRL1     | 0.01184  | -2.844648 |  |
| 12316 | Genotype determination | CHAC1      | 0.014002 | -2.843169 |  |
| 12317 | Genotype determination | ARRDC4     | 0.007254 | -2.811812 |  |
| 12318 | Genotype determination | C14orf139  | 0.013483 | -2.792873 |  |
| 12319 | Genotype determination | DDIT4      | 0.005581 | -2.721685 |  |
| 12320 | Genotype determination | SLC30A1    | 0.018726 | -2.688404 |  |
| 12321 | Genotype determination | PHLDB2     | 0.003757 | -2.672148 |  |
| 12322 | Genotype determination | NCRNA00173 | 0.007254 | -2.643593 |  |
| 12323 | Genotype determination | NEAT1      | 0.003938 | -2.58381  |  |
| 12324 | Genotype determination | APOBEC3F   | 0.017305 | -2.565073 |  |
| 12325 | Genotype determination | COL1A1     | 0.010989 | -2.558414 |  |
| 12326 | Genotype determination | LOC399959  | 0.021416 | -2.550447 |  |
| 12327 | Genotype determination | GNE        | 0.017479 | -2.538542 |  |
| 12328 | Genotype determination | EPPK1      | 0.009357 | -2.518823 |  |
| 12329 | Genotype determination | PBX1       | 0.015693 | -2.496228 |  |
| 12330 | Genotype determination | SYTL2      | 0.003938 | -2.478127 |  |
| 12331 | Genotype determination | CTH        | 0.020124 | -2.455897 |  |
| 12332 | Genotype determination | TOP1       | 0.013483 | -2.438088 |  |
| 12333 | Genotype determination | ARHGAP18   | 0.010461 | -2.43218  |  |
| 12334 | Genotype determination | SCD        | 0.005664 | -2.41538  |  |
| 12335 | Genotype determination | RUNDC3B    | 0.016477 | -2.412034 |  |
| 12336 | Genotype determination | ASNS       | 0.003757 | -2.38874  |  |
| 12337 | Genotype determination | FHL1       | 0.005664 | -2.382539 |  |
| 12338 | Genotype determination | RFX5       | 0.021063 | -2.378002 |  |
| 12339 | Genotype determination | ATP6AP1L   | 0.020596 | -2.375119 |  |
| 12340 | Genotype determination | C8orf83    | 0.019228 | -2.373885 |  |
| 12341 | Genotype determination | FGFBP1     | 0.007267 | -2.356262 |  |
| 12342 | Genotype determination | WBSCR27    | 0.007118 | -2.347703 |  |
| 12343 | Genotype determination | RASA4      | 0.014933 | -2.34242  |  |
| 12344 | Genotype determination | CCDC85B    | 0.009064 | -2.341203 |  |
| 12345 | Genotype determination | TRIM2      | 0.017298 | -2.335125 |  |
| 12346 | Genotype determination | SCNN1A     | 0.009064 | -2.324225 |  |
| 12347 | Genotype determination | PACSIN1    | 0.012178 | -2.318594 |  |
| 12348 | Genotype determination | PIR        | 0.005664 | -2.279947 |  |

|       |                        |              |          |             |  |
|-------|------------------------|--------------|----------|-------------|--|
| 12349 | Genotype determination | SREBF1       | 0.005982 | -2.272846   |  |
| 12350 | Genotype determination | LOC100507198 | 0.009162 | -2.268518   |  |
| 12351 | Genotype determination | LPIN1        | 0.011148 | -2.253629   |  |
| 12352 | Genotype determination | MIR17HG      | 0.022491 | -2.249337   |  |
| 12353 | Genotype determination | GABARAPL1    | 0.017298 | -2.222217   |  |
| 12354 | Genotype determination | HSD17B7      | 0.017305 | -2.220293   |  |
| 12355 | Genotype determination | RNFT2        | 0.009495 | -2.20381    |  |
| 12356 | Genotype determination | AQP3         | 0.005581 | -2.20152    |  |
| 12357 | Genotype determination | SESTD1       | 0.011148 | -2.200376   |  |
| 12358 | Genotype determination | FLJ31306     | 0.012178 | -2.194664   |  |
| 12359 | Genotype determination | TNS3         | 0.009162 | -2.191244   |  |
| 12360 | Genotype determination | RPS6KA5      | 0.0077   | -2.183663   |  |
| 12361 | Genotype determination | C10orf58     | 0.007254 | -2.170459   |  |
| 12362 | Genotype determination | DHCR7        | 0.009162 | -2.139836   |  |
| 12363 | Genotype determination | NR1D2        | 0.009601 | -2.138724   |  |
| 12364 | Genotype determination | PTPLA        | 0.016069 | -2.130955   |  |
| 12365 | Genotype determination | CBLB         | 0.019557 | -2.130216   |  |
| 12366 | Genotype determination | TM4SF18      | 0.009399 | -2.125055   |  |
| 12367 | Genotype determination | MECOM        | 0.022445 | -2.117703   |  |
| 12368 | Genotype determination | IDH1         | 0.0077   | -2.05801    |  |
| 12369 | Genotype determination | CRYGS        | 0.020596 | -2.051245   |  |
| 12370 | Genotype determination | RNASE4       | 0.011148 | -2.04344    |  |
| 12371 | Genotype determination | RBKS         | 0.020734 | -2.040256   |  |
| 12372 | Genotype determination | ARID5B       | 0.020917 | -2.027216   |  |
| 12373 | Genotype determination | C1orf97      | 0.016069 | -2.02511    |  |
| 12374 | Genotype determination | TAF9B        | 0.014933 | -2.002427   |  |
| 12375 | Genotype determination | IL27RA       | 0.022019 | 2.001387    |  |
| 12376 | Genotype determination | LOC730755    | 0.007254 | 2.042732    |  |
| 12377 | Genotype determination | THBS1        | 0.020473 | 2.125055    |  |
| 12378 | Genotype determination | NUPL1        | 0.007699 | 2.183284    |  |
| 12379 | Genotype determination | S100A11      | 0.010462 | 2.19847     |  |
| 12380 | Genotype determination | HOXA3        | 0.003757 | 2.283901    |  |
| 12381 | Genotype determination | NT5E         | 0.009162 | 2.426287    |  |
| 12382 | Genotype determination | CPA4         | 0.01594  | 2.491907    |  |
| 12383 | Genotype determination | PVRL3        | 0.007254 | 2.558858    |  |
| 12384 | Genotype determination | ACSL5        | 0.005988 | 3.316129    |  |
| 12385 | Genotype determination | HIST1H2BD    | 0.014933 | 3.335724    |  |
| 12386 | Hematocrit procedure   | TSPAN8       | 0        | -548.008396 |  |
| 12387 | Hematocrit procedure   | PLA2G2A      | 0.000006 | -510.8109   |  |
| 12388 | Hematocrit procedure   | AGR2         | 0.000006 | -440.058646 |  |
| 12389 | Hematocrit procedure   | LCK          | 0.000003 | -297.044368 |  |
| 12390 | Hematocrit procedure   | FAM3B        | 0.000009 | -205.648843 |  |
| 12391 | Hematocrit procedure   | MANSC1       | 0.000007 | -164.830215 |  |
| 12392 | Hematocrit procedure   | AKR1C2       | 0        | -144.760834 |  |
| 12393 | Hematocrit procedure   | CCL14-CCL15  | 0.000002 | -143.80414  |  |
| 12394 | Hematocrit procedure   | ASB4         | 0        | -142.105173 |  |
| 12395 | Hematocrit procedure   | C9orf152     | 0.000001 | -124.698025 |  |
| 12396 | Hematocrit procedure   | UGT1A6       | 0.000002 | -123.718578 |  |
| 12397 | Hematocrit procedure   | CASP1        | 0.000002 | -120.264435 |  |
| 12398 | Hematocrit procedure   | LOC100507192 | 0.000006 | -109.086216 |  |

|       |                      |              |          |             |  |
|-------|----------------------|--------------|----------|-------------|--|
| 12399 | Hematocrit procedure | VIL1         | 0.000001 | -107.071449 |  |
| 12400 | Hematocrit procedure | CARD16       | 0.000005 | -105.058602 |  |
| 12401 | Hematocrit procedure | AKR1C1       | 0.000001 | -101.557094 |  |
| 12402 | Hematocrit procedure | ABHD12B      | 0.000003 | -96.415173  |  |
| 12403 | Hematocrit procedure | C9orf64      | 0.000008 | -95.383544  |  |
| 12404 | Hematocrit procedure | KRT6B        | 0.000002 | -80.131876  |  |
| 12405 | Hematocrit procedure | AZGP1        | 0.000005 | -75.120812  |  |
| 12406 | Hematocrit procedure | PLAC8        | 0.000004 | -67.825095  |  |
| 12407 | Hematocrit procedure | PDZK1        | 0.000001 | -67.054252  |  |
| 12408 | Hematocrit procedure | EIF1AY       | 0.000001 | -63.631934  |  |
| 12409 | Hematocrit procedure | OXGR1        | 0.000002 | -63.151094  |  |
| 12410 | Hematocrit procedure | TFF3         | 0.000003 | -60.13651   |  |
| 12411 | Hematocrit procedure | UGT1A8       | 0        | -55.425596  |  |
| 12412 | Hematocrit procedure | LOC643201    | 0.000001 | -53.597538  |  |
| 12413 | Hematocrit procedure | PSMB8        | 0        | -52.118448  |  |
| 12414 | Hematocrit procedure | HIST1H3C     | 0.000172 | -51.063572  |  |
| 12415 | Hematocrit procedure | ALDH1A1      | 0.000066 | -49.933504  |  |
| 12416 | Hematocrit procedure | SCCPDH       | 0.000003 | -49.108069  |  |
| 12417 | Hematocrit procedure | SORBS1       | 0.000004 | -48.717851  |  |
| 12418 | Hematocrit procedure | HIST1H2BI    | 0.000014 | -44.493057  |  |
| 12419 | Hematocrit procedure | RARRES1      | 0        | -44.474544  |  |
| 12420 | Hematocrit procedure | PIP5K1B      | 0.000004 | -43.841456  |  |
| 12421 | Hematocrit procedure | SLC35D3      | 0.000001 | -42.916508  |  |
| 12422 | Hematocrit procedure | ZNF750       | 0.000002 | -39.920646  |  |
| 12423 | Hematocrit procedure | GNG2         | 0.000006 | -39.84096   |  |
| 12424 | Hematocrit procedure | GSTT1        | 0.000011 | -39.362819  |  |
| 12425 | Hematocrit procedure | GIMAP2       | 0.000002 | -38.94836   |  |
| 12426 | Hematocrit procedure | CALB1        | 0.000011 | -38.922345  |  |
| 12427 | Hematocrit procedure | RASEF        | 0.000003 | -38.209334  |  |
| 12428 | Hematocrit procedure | HIST1H2BB    | 0        | -37.778601  |  |
| 12429 | Hematocrit procedure | SPRR3        | 0.000007 | -37.149195  |  |
| 12430 | Hematocrit procedure | HCN1         | 0.000011 | -36.841006  |  |
| 12431 | Hematocrit procedure | DDC          | 0.000002 | -34.955331  |  |
| 12432 | Hematocrit procedure | SLC7A7       | 0.000004 | -33.871488  |  |
| 12433 | Hematocrit procedure | GAS2         | 0.000004 | -32.924259  |  |
| 12434 | Hematocrit procedure | ASCL2        | 0.000002 | -32.801288  |  |
| 12435 | Hematocrit procedure | FLJ20184     | 0        | -32.739482  |  |
| 12436 | Hematocrit procedure | UGT1A3       | 0.000215 | -31.187261  |  |
| 12437 | Hematocrit procedure | PROX1        | 0.000002 | -31.142485  |  |
| 12438 | Hematocrit procedure | LOC100124692 | 0.000008 | -30.496008  |  |
| 12439 | Hematocrit procedure | C15orf48     | 0.000006 | -30.344559  |  |
| 12440 | Hematocrit procedure | CCR6         | 0.000005 | -29.162851  |  |
| 12441 | Hematocrit procedure | SGK2         | 0.000001 | -29.128191  |  |
| 12442 | Hematocrit procedure | C4orf18      | 0.000016 | -26.415101  |  |
| 12443 | Hematocrit procedure | SCML4        | 0.000008 | -25.82047   |  |
| 12444 | Hematocrit procedure | CCR1         | 0.000006 | -25.656619  |  |
| 12445 | Hematocrit procedure | LOC401522    | 0.000002 | -23.921747  |  |
| 12446 | Hematocrit procedure | CYorf15A     | 0.000003 | -23.376836  |  |
| 12447 | Hematocrit procedure | ZNF703       | 0.000007 | -23.366143  |  |
| 12448 | Hematocrit procedure | CTSS         | 0.000006 | -23.057346  |  |

|       |                      |          |          |            |  |
|-------|----------------------|----------|----------|------------|--|
| 12449 | Hematocrit procedure | EPSTI1   | 0.000006 | -22.529177 |  |
| 12450 | Hematocrit procedure | PTGR1    | 0.000007 | -22.056714 |  |
| 12451 | Hematocrit procedure | HSD17B2  | 0.000074 | -21.748633 |  |
| 12452 | Hematocrit procedure | SORBS2   | 0.000003 | -20.472901 |  |
| 12453 | Hematocrit procedure | C5orf17  | 0.000004 | -19.220543 |  |
| 12454 | Hematocrit procedure | CXCR3    | 0.000008 | -18.966222 |  |
| 12455 | Hematocrit procedure | FOXA2    | 0.000003 | -18.266987 |  |
| 12456 | Hematocrit procedure | C6orf150 | 0.000175 | -17.5689   |  |
| 12457 | Hematocrit procedure | CD302    | 0.000018 | -17.464301 |  |
| 12458 | Hematocrit procedure | FCGRT    | 0.000007 | -17.453322 |  |
| 12459 | Hematocrit procedure | BCL2L15  | 0.000006 | -16.516903 |  |
| 12460 | Hematocrit procedure | CHST11   | 0.000007 | -15.569454 |  |
| 12461 | Hematocrit procedure | ACOT1    | 0.000011 | -15.376655 |  |
| 12462 | Hematocrit procedure | RNF128   | 0.000065 | -14.813946 |  |
| 12463 | Hematocrit procedure | MGLL     | 0.000165 | -14.614457 |  |
| 12464 | Hematocrit procedure | TNFRSF1B | 0.000007 | -14.592414 |  |
| 12465 | Hematocrit procedure | CACNA2D4 | 0.000007 | -14.539368 |  |
| 12466 | Hematocrit procedure | IRF8     | 0.000003 | -13.757054 |  |
| 12467 | Hematocrit procedure | A1CF     | 0.000008 | -13.437266 |  |
| 12468 | Hematocrit procedure | SDC1     | 0.000003 | -13.139692 |  |
| 12469 | Hematocrit procedure | IGF1R    | 0.000011 | -12.967261 |  |
| 12470 | Hematocrit procedure | EPHB2    | 0.000004 | -12.340973 |  |
| 12471 | Hematocrit procedure | NHSL1    | 0.000081 | -12.23337  |  |
| 12472 | Hematocrit procedure | C12orf27 | 0.000002 | -11.136132 |  |
| 12473 | Hematocrit procedure | SLC40A1  | 0.000033 | -10.868366 |  |
| 12474 | Hematocrit procedure | RNF157   | 0.000085 | -10.802542 |  |
| 12475 | Hematocrit procedure | PKP1     | 0.000012 | -10.698267 |  |
| 12476 | Hematocrit procedure | ECM1     | 0.000002 | -10.281889 |  |
| 12477 | Hematocrit procedure | ZNF506   | 0.000005 | -10.048693 |  |
| 12478 | Hematocrit procedure | EDEM1    | 0.000009 | -9.667083  |  |
| 12479 | Hematocrit procedure | CYorf15B | 0.000005 | -9.546186  |  |
| 12480 | Hematocrit procedure | DPEP1    | 0.000011 | -9.477999  |  |
| 12481 | Hematocrit procedure | CDK6     | 0        | -9.395292  |  |
| 12482 | Hematocrit procedure | OAS1     | 0.00027  | -9.357664  |  |
| 12483 | Hematocrit procedure | C6orf64  | 0.000008 | -9.350503  |  |
| 12484 | Hematocrit procedure | TUSC1    | 0.000071 | -8.920776  |  |
| 12485 | Hematocrit procedure | ANP32E   | 0.000003 | -8.890413  |  |
| 12486 | Hematocrit procedure | NSUN7    | 0.000002 | -8.518426  |  |
| 12487 | Hematocrit procedure | TNFRSF19 | 0.000006 | -8.17702   |  |
| 12488 | Hematocrit procedure | C10orf58 | 0.000003 | -8.113021  |  |
| 12489 | Hematocrit procedure | SH3PXD2A | 0.000006 | -8.056364  |  |
| 12490 | Hematocrit procedure | EHF      | 0.000119 | -8.010758  |  |
| 12491 | Hematocrit procedure | CHFR     | 0.000217 | -8.003618  |  |
| 12492 | Hematocrit procedure | DNAJC3   | 0.000003 | -7.962623  |  |
| 12493 | Hematocrit procedure | GPR39    | 0.000007 | -7.846796  |  |
| 12494 | Hematocrit procedure | RIPK3    | 0.000099 | -7.831119  |  |
| 12495 | Hematocrit procedure | MECOM    | 0.00001  | -7.812382  |  |
| 12496 | Hematocrit procedure | RIN2     | 0        | -7.78971   |  |
| 12497 | Hematocrit procedure | PERP     | 0.000011 | -7.760576  |  |
| 12498 | Hematocrit procedure | MAD1L1   | 0.000002 | -7.721161  |  |

|       |                      |              |          |           |  |
|-------|----------------------|--------------|----------|-----------|--|
| 12499 | Hematocrit procedure | CYP3A5       | 0.000271 | -7.717247 |  |
| 12500 | Hematocrit procedure | PDK3         | 0.000003 | -7.534799 |  |
| 12501 | Hematocrit procedure | TMEM62       | 0.000002 | -7.375007 |  |
| 12502 | Hematocrit procedure | EPB41L4B     | 0.000001 | -7.309877 |  |
| 12503 | Hematocrit procedure | ADAMTS17     | 0.000008 | -7.30365  |  |
| 12504 | Hematocrit procedure | ZNF260       | 0.000009 | -7.257563 |  |
| 12505 | Hematocrit procedure | PLIN2        | 0.000003 | -7.13014  |  |
| 12506 | Hematocrit procedure | PRSS2        | 0.000029 | -6.999257 |  |
| 12507 | Hematocrit procedure | UGT1A4       | 0.000277 | -6.898427 |  |
| 12508 | Hematocrit procedure | FUT6         | 0.000011 | -6.724803 |  |
| 12509 | Hematocrit procedure | HNF1A        | 0.000002 | -6.722007 |  |
| 12510 | Hematocrit procedure | HIST1H3G     | 0.000001 | -6.649406 |  |
| 12511 | Hematocrit procedure | MAST4        | 0.000008 | -6.637752 |  |
| 12512 | Hematocrit procedure | TAF8         | 0.000008 | -6.633628 |  |
| 12513 | Hematocrit procedure | HSPA12A      | 0.000001 | -6.570195 |  |
| 12514 | Hematocrit procedure | FAM113B      | 0.000018 | -6.458196 |  |
| 12515 | Hematocrit procedure | LOC400128    | 0.000008 | -6.414813 |  |
| 12516 | Hematocrit procedure | GNAS         | 0.000106 | -6.351093 |  |
| 12517 | Hematocrit procedure | SPATA13      | 0.000011 | -6.214893 |  |
| 12518 | Hematocrit procedure | SRC          | 0.00013  | -6.169824 |  |
| 12519 | Hematocrit procedure | MED20        | 0.000003 | -6.097804 |  |
| 12520 | Hematocrit procedure | PRDM1        | 0.000091 | -6.095754 |  |
| 12521 | Hematocrit procedure | EDAR         | 0.000008 | -6.047987 |  |
| 12522 | Hematocrit procedure | TCF7         | 0.000005 | -6.035586 |  |
| 12523 | Hematocrit procedure | LPCAT1       | 0.000007 | -5.975302 |  |
| 12524 | Hematocrit procedure | LOC100499467 | 0.000019 | -5.858976 |  |
| 12525 | Hematocrit procedure | APOL6        | 0.000009 | -5.838919 |  |
| 12526 | Hematocrit procedure | MSH3         | 0.00001  | -5.813158 |  |
| 12527 | Hematocrit procedure | EPHA4        | 0.000006 | -5.611204 |  |
| 12528 | Hematocrit procedure | NF1          | 0.000011 | -5.571354 |  |
| 12529 | Hematocrit procedure | CHN2         | 0.000002 | -5.495506 |  |
| 12530 | Hematocrit procedure | ARHGAP26     | 0.000003 | -5.448188 |  |
| 12531 | Hematocrit procedure | LAMA3        | 0.000005 | -5.446837 |  |
| 12532 | Hematocrit procedure | PRSS1        | 0.000066 | -5.37163  |  |
| 12533 | Hematocrit procedure | SIGLEC15     | 0.000008 | -5.328116 |  |
| 12534 | Hematocrit procedure | SLC16A4      | 0.000241 | -5.132544 |  |
| 12535 | Hematocrit procedure | MAP7         | 0.000007 | -4.998464 |  |
| 12536 | Hematocrit procedure | MRPS10       | 0.000001 | -4.993962 |  |
| 12537 | Hematocrit procedure | HPDL         | 0.000181 | -4.976846 |  |
| 12538 | Hematocrit procedure | SMARCA2      | 0.000012 | -4.928856 |  |
| 12539 | Hematocrit procedure | PSD4         | 0.000002 | -4.836057 |  |
| 12540 | Hematocrit procedure | DNM1         | 0.000111 | -4.792522 |  |
| 12541 | Hematocrit procedure | IFNGR1       | 0.000004 | -4.775064 |  |
| 12542 | Hematocrit procedure | LOC100507328 | 0.000006 | -4.76041  |  |
| 12543 | Hematocrit procedure | GALK2        | 0.000011 | -4.648461 |  |
| 12544 | Hematocrit procedure | IL20RA       | 0.000092 | -4.620432 |  |
| 12545 | Hematocrit procedure | ANKRD22      | 0.000008 | -4.590764 |  |
| 12546 | Hematocrit procedure | LMO7         | 0        | -4.488017 |  |
| 12547 | Hematocrit procedure | ARGLU1       | 0.000003 | -4.387082 |  |
| 12548 | Hematocrit procedure | TBPL1        | 0.000001 | -4.377912 |  |

|       |                      |          |          |           |  |
|-------|----------------------|----------|----------|-----------|--|
| 12549 | Hematocrit procedure | SEC16B   | 0.000003 | -4.300372 |  |
| 12550 | Hematocrit procedure | CTSH     | 0.000011 | -4.285228 |  |
| 12551 | Hematocrit procedure | CD68     | 0.000005 | -4.278797 |  |
| 12552 | Hematocrit procedure | MIA2     | 0.000019 | -4.20487  |  |
| 12553 | Hematocrit procedure | PRSS3    | 0.000095 | -4.109125 |  |
| 12554 | Hematocrit procedure | C5       | 0.000039 | -4.072259 |  |
| 12555 | Hematocrit procedure | FRK      | 0.00013  | -4.030782 |  |
| 12556 | Hematocrit procedure | FBLIM1   | 0.000102 | -3.989457 |  |
| 12557 | Hematocrit procedure | TJP2     | 0.000003 | -3.974191 |  |
| 12558 | Hematocrit procedure | RASSF5   | 0.000001 | -3.967723 |  |
| 12559 | Hematocrit procedure | F5       | 0.000272 | -3.810503 |  |
| 12560 | Hematocrit procedure | TRAK1    | 0.000004 | -3.684815 |  |
| 12561 | Hematocrit procedure | IFT88    | 0.000004 | -3.610645 |  |
| 12562 | Hematocrit procedure | PLEKHA6  | 0.000206 | -3.528435 |  |
| 12563 | Hematocrit procedure | UBAC2    | 0.000002 | -3.488265 |  |
| 12564 | Hematocrit procedure | USH1C    | 0.000014 | -3.47718  |  |
| 12565 | Hematocrit procedure | RALGAPA2 | 0.000003 | -3.471811 |  |
| 12566 | Hematocrit procedure | HOXC5    | 0.000005 | -3.435105 |  |
| 12567 | Hematocrit procedure | S100A5   | 0.000012 | -3.429268 |  |
| 12568 | Hematocrit procedure | TPP2     | 0        | -3.361754 |  |
| 12569 | Hematocrit procedure | GFPT1    | 0.000008 | -3.359642 |  |
| 12570 | Hematocrit procedure | GCOM1    | 0.000018 | -3.35798  |  |
| 12571 | Hematocrit procedure | TNS4     | 0.000007 | -3.341882 |  |
| 12572 | Hematocrit procedure | ST3GAL4  | 0.000263 | -3.331892 |  |
| 12573 | Hematocrit procedure | FERMT1   | 0.000109 | -3.325981 |  |
| 12574 | Hematocrit procedure | CARKD    | 0.000005 | -3.322652 |  |
| 12575 | Hematocrit procedure | RABGAP1L | 0        | -3.273762 |  |
| 12576 | Hematocrit procedure | TMC7     | 0.000037 | -3.231842 |  |
| 12577 | Hematocrit procedure | RNF6     | 0.000011 | -3.218499 |  |
| 12578 | Hematocrit procedure | COL17A1  | 0.000084 | -3.189146 |  |
| 12579 | Hematocrit procedure | TNRC18   | 0.000005 | -3.135812 |  |
| 12580 | Hematocrit procedure | LAMB3    | 0.000027 | -3.13326  |  |
| 12581 | Hematocrit procedure | BAIAP2L2 | 0.000084 | -3.122287 |  |
| 12582 | Hematocrit procedure | KALRN    | 0.000069 | -3.11255  |  |
| 12583 | Hematocrit procedure | LNK2     | 0.000003 | -3.098544 |  |
| 12584 | Hematocrit procedure | SLC5A1   | 0.000046 | -3.058335 |  |
| 12585 | Hematocrit procedure | RPP25    | 0.000177 | -3.049872 |  |
| 12586 | Hematocrit procedure | PTK6     | 0.000071 | -3.034597 |  |
| 12587 | Hematocrit procedure | MIPEP    | 0.000003 | -3.028462 |  |
| 12588 | Hematocrit procedure | TSEN15   | 0.000008 | -3.014576 |  |
| 12589 | Hematocrit procedure | SLC25A13 | 0.000108 | -2.981576 |  |
| 12590 | Hematocrit procedure | TMEM133  | 0.000081 | -2.945957 |  |
| 12591 | Hematocrit procedure | ITGA6    | 0.000017 | -2.921719 |  |
| 12592 | Hematocrit procedure | FAM108C1 | 0.000281 | -2.89171  |  |
| 12593 | Hematocrit procedure | STAMBPL1 | 0.000004 | -2.891243 |  |
| 12594 | Hematocrit procedure | HBS1L    | 0.000005 | -2.859622 |  |
| 12595 | Hematocrit procedure | PTPRB    | 0.000082 | -2.847353 |  |
| 12596 | Hematocrit procedure | KRT8P41  | 0.001991 | -2.833851 |  |
| 12597 | Hematocrit procedure | FUT4     | 0.000078 | -2.815228 |  |
| 12598 | Hematocrit procedure | CHCHD7   | 0.000001 | -2.802096 |  |

|       |                      |           |          |           |  |
|-------|----------------------|-----------|----------|-----------|--|
| 12599 | Hematocrit procedure | EPS8L3    | 0.000032 | -2.795256 |  |
| 12600 | Hematocrit procedure | TUBA4A    | 0.000008 | -2.789495 |  |
| 12601 | Hematocrit procedure | ELF3      | 0.000421 | -2.787356 |  |
| 12602 | Hematocrit procedure | ARHGAP42  | 0.000055 | -2.773032 |  |
| 12603 | Hematocrit procedure | SATB1     | 0.000097 | -2.751735 |  |
| 12604 | Hematocrit procedure | RGS14     | 0.000096 | -2.726364 |  |
| 12605 | Hematocrit procedure | JUN       | 0.000055 | -2.725946 |  |
| 12606 | Hematocrit procedure | TDRKH     | 0.000007 | -2.717036 |  |
| 12607 | Hematocrit procedure | ROD1      | 0.000008 | -2.699594 |  |
| 12608 | Hematocrit procedure | DPAGT1    | 0        | -2.696705 |  |
| 12609 | Hematocrit procedure | ADAP1     | 0.0001   | -2.687005 |  |
| 12610 | Hematocrit procedure | METTL9    | 0.000027 | -2.673071 |  |
| 12611 | Hematocrit procedure | MKKS      | 0.000002 | -2.66267  |  |
| 12612 | Hematocrit procedure | AADACL1   | 0        | -2.662401 |  |
| 12613 | Hematocrit procedure | SURF4     | 0.000006 | -2.6467   |  |
| 12614 | Hematocrit procedure | MGST1     | 0.000911 | -2.642064 |  |
| 12615 | Hematocrit procedure | EPHB3     | 0.000008 | -2.630731 |  |
| 12616 | Hematocrit procedure | CASK      | 0.000008 | -2.618893 |  |
| 12617 | Hematocrit procedure | MTMR6     | 0.000005 | -2.609182 |  |
| 12618 | Hematocrit procedure | AGA       | 0.000215 | -2.593541 |  |
| 12619 | Hematocrit procedure | CEBPD     | 0.001585 | -2.58863  |  |
| 12620 | Hematocrit procedure | NCBP1     | 0.000007 | -2.570732 |  |
| 12621 | Hematocrit procedure | MRPS31    | 0.000004 | -2.566806 |  |
| 12622 | Hematocrit procedure | LAD1      | 0.000172 | -2.563215 |  |
| 12623 | Hematocrit procedure | SBF1      | 0.00001  | -2.529004 |  |
| 12624 | Hematocrit procedure | VDAC1     | 0        | -2.524484 |  |
| 12625 | Hematocrit procedure | EFNB1     | 0.000003 | -2.511787 |  |
| 12626 | Hematocrit procedure | GPR89A    | 0.000011 | -2.508425 |  |
| 12627 | Hematocrit procedure | MLKL      | 0.000008 | -2.480787 |  |
| 12628 | Hematocrit procedure | ARHGEF10L | 0.000044 | -2.468049 |  |
| 12629 | Hematocrit procedure | GPR160    | 0.000006 | -2.457485 |  |
| 12630 | Hematocrit procedure | ECOP      | 0.000166 | -2.441085 |  |
| 12631 | Hematocrit procedure | INPP1     | 0.000097 | -2.422773 |  |
| 12632 | Hematocrit procedure | FAM62B    | 0.000001 | -2.414755 |  |
| 12633 | Hematocrit procedure | PDIA4     | 0.00001  | -2.411109 |  |
| 12634 | Hematocrit procedure | SIK1      | 0.000055 | -2.407825 |  |
| 12635 | Hematocrit procedure | CTSD      | 0.000039 | -2.401471 |  |
| 12636 | Hematocrit procedure | MCTP1     | 0.000112 | -2.393982 |  |
| 12637 | Hematocrit procedure | ZNF223    | 0.000022 | -2.384845 |  |
| 12638 | Hematocrit procedure | PRKCA     | 0.000153 | -2.378513 |  |
| 12639 | Hematocrit procedure | GLA       | 0.000029 | -2.353499 |  |
| 12640 | Hematocrit procedure | PLCH1     | 0.000044 | -2.337335 |  |
| 12641 | Hematocrit procedure | TMSB4X    | 0.000008 | -2.335537 |  |
| 12642 | Hematocrit procedure | SNRPA1    | 0.000007 | -2.308718 |  |
| 12643 | Hematocrit procedure | SEC23B    | 0.000098 | -2.308136 |  |
| 12644 | Hematocrit procedure | C1orf56   | 0.00082  | -2.307062 |  |
| 12645 | Hematocrit procedure | ST7       | 0.000002 | -2.304399 |  |
| 12646 | Hematocrit procedure | WNT11     | 0.000135 | -2.301905 |  |
| 12647 | Hematocrit procedure | SPSB1     | 0.0013   | -2.300466 |  |
| 12648 | Hematocrit procedure | ABHD12    | 0.000046 | -2.296449 |  |



|       |                      |              |          |           |  |
|-------|----------------------|--------------|----------|-----------|--|
| 12649 | Hematocrit procedure | FAM73B       | 0.000007 | -2.288975 |  |
| 12650 | Hematocrit procedure | C20orf74     | 0.000106 | -2.282048 |  |
| 12651 | Hematocrit procedure | FAM60A       | 0.001316 | -2.28002  |  |
| 12652 | Hematocrit procedure | PDIA6        | 0.000001 | -2.277313 |  |
| 12653 | Hematocrit procedure | LOC100506922 | 0.000096 | -2.256579 |  |
| 12654 | Hematocrit procedure | MNX1         | 0.000413 | -2.247583 |  |
| 12655 | Hematocrit procedure | RICS         | 0.000012 | -2.22689  |  |
| 12656 | Hematocrit procedure | GTF2IRD2B    | 0.000215 | -2.225307 |  |
| 12657 | Hematocrit procedure | UBE2D2       | 0.000011 | -2.218704 |  |
| 12658 | Hematocrit procedure | ZDHHC9       | 0.00026  | -2.215214 |  |
| 12659 | Hematocrit procedure | HIST4H4      | 0.000273 | -2.205272 |  |
| 12660 | Hematocrit procedure | ROMO1        | 0.000002 | -2.201651 |  |
| 12661 | Hematocrit procedure | LMNA         | 0.000237 | -2.191642 |  |
| 12662 | Hematocrit procedure | LFNG         | 0.000028 | -2.189166 |  |
| 12663 | Hematocrit procedure | RIPK4        | 0.000018 | -2.176778 |  |
| 12664 | Hematocrit procedure | MACF1        | 0.000004 | -2.176726 |  |
| 12665 | Hematocrit procedure | KRT8         | 0.000684 | -2.154823 |  |
| 12666 | Hematocrit procedure | LOC645249    | 0.000043 | -2.153423 |  |
| 12667 | Hematocrit procedure | LMAN2        | 0.000009 | -2.153212 |  |
| 12668 | Hematocrit procedure | CCDC82       | 0.000073 | -2.151796 |  |
| 12669 | Hematocrit procedure | TOLLIP       | 0.000011 | -2.144689 |  |
| 12670 | Hematocrit procedure | DLG3         | 0.000157 | -2.144243 |  |
| 12671 | Hematocrit procedure | ETV6         | 0.000197 | -2.139379 |  |
| 12672 | Hematocrit procedure | GSTK1        | 0.000047 | -2.134457 |  |
| 12673 | Hematocrit procedure | LOC100132999 | 0.000077 | -2.13246  |  |
| 12674 | Hematocrit procedure | WDR67        | 0.000066 | -2.131068 |  |
| 12675 | Hematocrit procedure | RBCK1        | 0.00012  | -2.130934 |  |
| 12676 | Hematocrit procedure | ACY1         | 0.000024 | -2.124582 |  |
| 12677 | Hematocrit procedure | C3orf23      | 0        | -2.119588 |  |
| 12678 | Hematocrit procedure | ARFGEF2      | 0.000032 | -2.111078 |  |
| 12679 | Hematocrit procedure | PCGF5        | 0.000051 | -2.107123 |  |
| 12680 | Hematocrit procedure | CCDC109A     | 0.000004 | -2.105463 |  |
| 12681 | Hematocrit procedure | TMEM164      | 0.000033 | -2.103535 |  |
| 12682 | Hematocrit procedure | VAPB         | 0.000791 | -2.101942 |  |
| 12683 | Hematocrit procedure | CDC42SE2     | 0.000005 | -2.101573 |  |
| 12684 | Hematocrit procedure | B4GALT5      | 0.00004  | -2.087517 |  |
| 12685 | Hematocrit procedure | MTMR2        | 0.000008 | -2.083627 |  |
| 12686 | Hematocrit procedure | CIB1         | 0.000575 | -2.081377 |  |
| 12687 | Hematocrit procedure | MCCC1        | 0.000077 | -2.080364 |  |
| 12688 | Hematocrit procedure | ADRBK1       | 0.000003 | -2.075921 |  |
| 12689 | Hematocrit procedure | BGN          | 0.000202 | -2.072609 |  |
| 12690 | Hematocrit procedure | CCDC64       | 0.000014 | -2.069689 |  |
| 12691 | Hematocrit procedure | LOC339988    | 0.000008 | -2.000944 |  |
| 12692 | Hematocrit procedure | GTPBP3       | 0.000709 | 2.000319  |  |
| 12693 | Hematocrit procedure | ZBTB8        | 0.000169 | 2.002427  |  |
| 12694 | Hematocrit procedure | MGC57346     | 0.000011 | 2.0041    |  |
| 12695 | Hematocrit procedure | NHLRC2       | 0.000173 | 2.005527  |  |
| 12696 | Hematocrit procedure | ADAM22       | 0.000216 | 2.00715   |  |
| 12697 | Hematocrit procedure | TIAL1        | 0.000008 | 2.008613  |  |
| 12698 | Hematocrit procedure | 5-Mar        | 0.000021 | 2.009577  |  |

|       |                      |            |          |          |  |
|-------|----------------------|------------|----------|----------|--|
| 12699 | Hematocrit procedure | GCFC1      | 0.000028 | 2.012418 |  |
| 12700 | Hematocrit procedure | SMU1       | 0.00001  | 2.014751 |  |
| 12701 | Hematocrit procedure | TRMT1      | 0.000044 | 2.021316 |  |
| 12702 | Hematocrit procedure | RPL4       | 0.000192 | 2.02487  |  |
| 12703 | Hematocrit procedure | AUH        | 0.000004 | 2.02723  |  |
| 12704 | Hematocrit procedure | QRICH2     | 0.000234 | 2.027934 |  |
| 12705 | Hematocrit procedure | KIAA1333   | 0.000072 | 2.030055 |  |
| 12706 | Hematocrit procedure | METTL10    | 0.000008 | 2.03607  |  |
| 12707 | Hematocrit procedure | RAVER2     | 0.000087 | 2.039754 |  |
| 12708 | Hematocrit procedure | NACC1      | 0        | 2.041808 |  |
| 12709 | Hematocrit procedure | CDKL3      | 0.000247 | 2.04579  |  |
| 12710 | Hematocrit procedure | DENND5A    | 0.000169 | 2.04788  |  |
| 12711 | Hematocrit procedure | GEMIN5     | 0.000188 | 2.052325 |  |
| 12712 | Hematocrit procedure | MYBBP1A    | 0.000069 | 2.05959  |  |
| 12713 | Hematocrit procedure | PDLIM5     | 0.000004 | 2.061163 |  |
| 12714 | Hematocrit procedure | INSR       | 0.000057 | 2.074774 |  |
| 12715 | Hematocrit procedure | KPNA5      | 0.000021 | 2.080091 |  |
| 12716 | Hematocrit procedure | LAMB2      | 0.000265 | 2.080383 |  |
| 12717 | Hematocrit procedure | GTF2H2D    | 0.000424 | 2.082886 |  |
| 12718 | Hematocrit procedure | INTS2      | 0.000033 | 2.084261 |  |
| 12719 | Hematocrit procedure | IFT57      | 0.000858 | 2.09242  |  |
| 12720 | Hematocrit procedure | PLD6       | 0.000173 | 2.092744 |  |
| 12721 | Hematocrit procedure | DGCR8      | 0.000004 | 2.097377 |  |
| 12722 | Hematocrit procedure | ZMYM1      | 0.000171 | 2.098944 |  |
| 12723 | Hematocrit procedure | KTN1       | 0.000281 | 2.10316  |  |
| 12724 | Hematocrit procedure | MSTO2P     | 0.000064 | 2.105921 |  |
| 12725 | Hematocrit procedure | CP110      | 0.000081 | 2.107218 |  |
| 12726 | Hematocrit procedure | C18orf24   | 0.00007  | 2.107296 |  |
| 12727 | Hematocrit procedure | PQLC1      | 0.000005 | 2.11065  |  |
| 12728 | Hematocrit procedure | IMPACT     | 0.000011 | 2.111917 |  |
| 12729 | Hematocrit procedure | TOP3B      | 0.000022 | 2.113287 |  |
| 12730 | Hematocrit procedure | BMP8B      | 0.00001  | 2.118034 |  |
| 12731 | Hematocrit procedure | CCDC24     | 0.000018 | 2.120131 |  |
| 12732 | Hematocrit procedure | HDGF2      | 0.000008 | 2.121635 |  |
| 12733 | Hematocrit procedure | SPTB       | 0.000251 | 2.134205 |  |
| 12734 | Hematocrit procedure | CDCA2      | 0.000062 | 2.134742 |  |
| 12735 | Hematocrit procedure | ST6GALNAC6 | 0.000245 | 2.134926 |  |
| 12736 | Hematocrit procedure | C20orf96   | 0.000107 | 2.141774 |  |
| 12737 | Hematocrit procedure | BTN2A2     | 0.000132 | 2.143085 |  |
| 12738 | Hematocrit procedure | C14orf159  | 0.002043 | 2.143809 |  |
| 12739 | Hematocrit procedure | KIAA1432   | 0.000002 | 2.144912 |  |
| 12740 | Hematocrit procedure | AGPAT5     | 0.000227 | 2.148063 |  |
| 12741 | Hematocrit procedure | LOC646851  | 0.000099 | 2.150201 |  |
| 12742 | Hematocrit procedure | INVS       | 0.00029  | 2.150785 |  |
| 12743 | Hematocrit procedure | CTNNAL1    | 0.000186 | 2.152896 |  |
| 12744 | Hematocrit procedure | RTTN       | 0.00001  | 2.154799 |  |
| 12745 | Hematocrit procedure | USP33      | 0.000005 | 2.154806 |  |
| 12746 | Hematocrit procedure | CEPT1      | 0.00011  | 2.164874 |  |
| 12747 | Hematocrit procedure | HOXB13     | 0.00003  | 2.165502 |  |
| 12748 | Hematocrit procedure | YJEFN3     | 0.000022 | 2.167793 |  |

|       |                      |           |          |          |  |
|-------|----------------------|-----------|----------|----------|--|
| 12749 | Hematocrit procedure | ACCN2     | 0.001269 | 2.170963 |  |
| 12750 | Hematocrit procedure | SETD4     | 0.001022 | 2.175046 |  |
| 12751 | Hematocrit procedure | PCNX      | 0.000005 | 2.176842 |  |
| 12752 | Hematocrit procedure | POMT2     | 0.000136 | 2.181866 |  |
| 12753 | Hematocrit procedure | HCG8      | 0.000105 | 2.182757 |  |
| 12754 | Hematocrit procedure | HMGB1     | 0.000257 | 2.183219 |  |
| 12755 | Hematocrit procedure | NSD1      | 0.000002 | 2.185498 |  |
| 12756 | Hematocrit procedure | MAP3K7    | 0.000008 | 2.186104 |  |
| 12757 | Hematocrit procedure | HSP90AA1  | 0.001783 | 2.189518 |  |
| 12758 | Hematocrit procedure | DUS3L     | 0.000158 | 2.196435 |  |
| 12759 | Hematocrit procedure | EIF2AK4   | 0.000004 | 2.199079 |  |
| 12760 | Hematocrit procedure | MON2      | 0.000038 | 2.203917 |  |
| 12761 | Hematocrit procedure | HEATR6    | 0.000171 | 2.205405 |  |
| 12762 | Hematocrit procedure | RPS28     | 0.000155 | 2.20962  |  |
| 12763 | Hematocrit procedure | DDR2      | 0.000228 | 2.217265 |  |
| 12764 | Hematocrit procedure | SLC25A30  | 0.0001   | 2.221969 |  |
| 12765 | Hematocrit procedure | MTX3      | 0.000005 | 2.2229   |  |
| 12766 | Hematocrit procedure | NPC2      | 0.001683 | 2.222995 |  |
| 12767 | Hematocrit procedure | SLC25A39  | 0.000001 | 2.228725 |  |
| 12768 | Hematocrit procedure | PNPLA6    | 0.000004 | 2.230106 |  |
| 12769 | Hematocrit procedure | BAG3      | 0.001683 | 2.2303   |  |
| 12770 | Hematocrit procedure | CITED2    | 0.000053 | 2.232065 |  |
| 12771 | Hematocrit procedure | CDK9      | 0.000844 | 2.233081 |  |
| 12772 | Hematocrit procedure | EXOC6B    | 0.000059 | 2.233084 |  |
| 12773 | Hematocrit procedure | RAB11FIP2 | 0.000073 | 2.234653 |  |
| 12774 | Hematocrit procedure | NTAN1     | 0.000203 | 2.23913  |  |
| 12775 | Hematocrit procedure | PPM1M     | 0.000004 | 2.24155  |  |
| 12776 | Hematocrit procedure | EFR3A     | 0.000005 | 2.248263 |  |
| 12777 | Hematocrit procedure | POLI      | 0.000007 | 2.267001 |  |
| 12778 | Hematocrit procedure | LYG1      | 0.000174 | 2.267478 |  |
| 12779 | Hematocrit procedure | DOCK1     | 0        | 2.267904 |  |
| 12780 | Hematocrit procedure | DCAKD     | 0.001901 | 2.272676 |  |
| 12781 | Hematocrit procedure | NOC3L     | 0.000093 | 2.275555 |  |
| 12782 | Hematocrit procedure | SHOX2     | 0.000001 | 2.276001 |  |
| 12783 | Hematocrit procedure | C17orf69  | 0.000223 | 2.279328 |  |
| 12784 | Hematocrit procedure | RANBP17   | 0.000015 | 2.279878 |  |
| 12785 | Hematocrit procedure | SRMS      | 0.000118 | 2.283625 |  |
| 12786 | Hematocrit procedure | C10orf137 | 0.000001 | 2.288498 |  |
| 12787 | Hematocrit procedure | PHTF2     | 0.00017  | 2.288694 |  |
| 12788 | Hematocrit procedure | RUSC2     | 0.000045 | 2.289799 |  |
| 12789 | Hematocrit procedure | ARHGEF37  | 0.000015 | 2.290725 |  |
| 12790 | Hematocrit procedure | CSPG5     | 0.000102 | 2.291194 |  |
| 12791 | Hematocrit procedure | SENP6     | 0.000165 | 2.296558 |  |
| 12792 | Hematocrit procedure | CDH24     | 0.000056 | 2.29812  |  |
| 12793 | Hematocrit procedure | MOSPD1    | 0.000053 | 2.301269 |  |
| 12794 | Hematocrit procedure | GLG1      | 0.000011 | 2.3013   |  |
| 12795 | Hematocrit procedure | CENPC1    | 0.000015 | 2.302085 |  |
| 12796 | Hematocrit procedure | FXR1      | 0.000005 | 2.303015 |  |
| 12797 | Hematocrit procedure | LRPAP1    | 0.000069 | 2.310307 |  |
| 12798 | Hematocrit procedure | TNFSF12   | 0.000061 | 2.313381 |  |

|       |                      |              |          |          |  |
|-------|----------------------|--------------|----------|----------|--|
| 12799 | Hematocrit procedure | ZCCHC11      | 0.000028 | 2.321129 |  |
| 12800 | Hematocrit procedure | GOLGA9P      | 0.000092 | 2.322996 |  |
| 12801 | Hematocrit procedure | ZSCAN20      | 0.000184 | 2.334139 |  |
| 12802 | Hematocrit procedure | BTRC         | 0.000218 | 2.339372 |  |
| 12803 | Hematocrit procedure | TRAF3        | 0.000028 | 2.339781 |  |
| 12804 | Hematocrit procedure | CBX7         | 0.000421 | 2.340475 |  |
| 12805 | Hematocrit procedure | ERI1         | 0.000211 | 2.342181 |  |
| 12806 | Hematocrit procedure | INPP5E       | 0.000001 | 2.344917 |  |
| 12807 | Hematocrit procedure | KSR2         | 0.000041 | 2.345834 |  |
| 12808 | Hematocrit procedure | UNC119       | 0.000046 | 2.348208 |  |
| 12809 | Hematocrit procedure | BNIP3L       | 0.000002 | 2.359025 |  |
| 12810 | Hematocrit procedure | FUT10        | 0.000028 | 2.364717 |  |
| 12811 | Hematocrit procedure | CNOT7        | 0.000104 | 2.367895 |  |
| 12812 | Hematocrit procedure | CLUAP1       | 0.001451 | 2.37133  |  |
| 12813 | Hematocrit procedure | KCTD6        | 0.000059 | 2.376819 |  |
| 12814 | Hematocrit procedure | MAMLD1       | 0.000008 | 2.377772 |  |
| 12815 | Hematocrit procedure | C6orf170     | 0.000175 | 2.382184 |  |
| 12816 | Hematocrit procedure | C9orf61      | 0.000154 | 2.385151 |  |
| 12817 | Hematocrit procedure | PRKAR1A      | 0.000008 | 2.414002 |  |
| 12818 | Hematocrit procedure | NR2F2        | 0.001215 | 2.416529 |  |
| 12819 | Hematocrit procedure | CELSR2       | 0.000148 | 2.416698 |  |
| 12820 | Hematocrit procedure | C18orf54     | 0.00015  | 2.422807 |  |
| 12821 | Hematocrit procedure | LOC100507448 | 0.000008 | 2.423487 |  |
| 12822 | Hematocrit procedure | SEC31B       | 0.000003 | 2.428658 |  |
| 12823 | Hematocrit procedure | OSBP2        | 0.000125 | 2.441452 |  |
| 12824 | Hematocrit procedure | PIK3C3       | 0.000067 | 2.444206 |  |
| 12825 | Hematocrit procedure | NOTCH2NL     | 0.000099 | 2.448863 |  |
| 12826 | Hematocrit procedure | IFT74        | 0.000199 | 2.45617  |  |
| 12827 | Hematocrit procedure | DOCK7        | 0.00001  | 2.459611 |  |
| 12828 | Hematocrit procedure | F8           | 0.000054 | 2.460219 |  |
| 12829 | Hematocrit procedure | DCLK2        | 0.000008 | 2.466714 |  |
| 12830 | Hematocrit procedure | RNGTT        | 0.000007 | 2.474348 |  |
| 12831 | Hematocrit procedure | PLA2G6       | 0.000078 | 2.483683 |  |
| 12832 | Hematocrit procedure | TOP3A        | 0.000235 | 2.487689 |  |
| 12833 | Hematocrit procedure | DDHD1        | 0.000015 | 2.488128 |  |
| 12834 | Hematocrit procedure | LHPP         | 0.000262 | 2.491126 |  |
| 12835 | Hematocrit procedure | LYPLAL1      | 0.000019 | 2.496133 |  |
| 12836 | Hematocrit procedure | NTN5         | 0.000014 | 2.500072 |  |
| 12837 | Hematocrit procedure | GPAM         | 0.000217 | 2.502145 |  |
| 12838 | Hematocrit procedure | TPST1        | 0.000145 | 2.506486 |  |
| 12839 | Hematocrit procedure | RBM4         | 0.000055 | 2.508263 |  |
| 12840 | Hematocrit procedure | ANKRD36B     | 0.000012 | 2.511553 |  |
| 12841 | Hematocrit procedure | LOC728377    | 0.000002 | 2.515295 |  |
| 12842 | Hematocrit procedure | TGFB1I1      | 0.000292 | 2.521098 |  |
| 12843 | Hematocrit procedure | ELAC1        | 0.000083 | 2.535801 |  |
| 12844 | Hematocrit procedure | CHST3        | 0.000017 | 2.541441 |  |
| 12845 | Hematocrit procedure | SSX2IP       | 0.000237 | 2.543506 |  |
| 12846 | Hematocrit procedure | WDR7         | 0.00009  | 2.543718 |  |
| 12847 | Hematocrit procedure | RNFT2        | 0.000901 | 2.544818 |  |
| 12848 | Hematocrit procedure | RAD51C       | 0.000073 | 2.545745 |  |

|       |                      |              |          |          |  |
|-------|----------------------|--------------|----------|----------|--|
| 12849 | Hematocrit procedure | THRAP3       | 0.000016 | 2.547111 |  |
| 12850 | Hematocrit procedure | SGSH         | 0.000136 | 2.547538 |  |
| 12851 | Hematocrit procedure | TRIM37       | 0.000077 | 2.557137 |  |
| 12852 | Hematocrit procedure | SEC61A2      | 0.000002 | 2.557307 |  |
| 12853 | Hematocrit procedure | ZDHC17       | 0.000006 | 2.562145 |  |
| 12854 | Hematocrit procedure | TNRC6C       | 0.000008 | 2.56454  |  |
| 12855 | Hematocrit procedure | CROP         | 0.000254 | 2.584791 |  |
| 12856 | Hematocrit procedure | TIFA         | 0.000069 | 2.606932 |  |
| 12857 | Hematocrit procedure | BCORL1       | 0.000185 | 2.618549 |  |
| 12858 | Hematocrit procedure | C2orf76      | 0.000161 | 2.632252 |  |
| 12859 | Hematocrit procedure | OAT          | 0.001585 | 2.634221 |  |
| 12860 | Hematocrit procedure | C21orf7      | 0.000003 | 2.636255 |  |
| 12861 | Hematocrit procedure | ZNF57        | 0.000004 | 2.63682  |  |
| 12862 | Hematocrit procedure | NEK1         | 0.000095 | 2.644595 |  |
| 12863 | Hematocrit procedure | FBXL2        | 0.000111 | 2.645171 |  |
| 12864 | Hematocrit procedure | EIF3F        | 0.000039 | 2.645408 |  |
| 12865 | Hematocrit procedure | LOC652005    | 0.000018 | 2.648741 |  |
| 12866 | Hematocrit procedure | HS6ST1       | 0.000022 | 2.650736 |  |
| 12867 | Hematocrit procedure | PKN3         | 0.000087 | 2.66276  |  |
| 12868 | Hematocrit procedure | HYMAI        | 0.000108 | 2.667008 |  |
| 12869 | Hematocrit procedure | MEGF6        | 0.000094 | 2.674067 |  |
| 12870 | Hematocrit procedure | TARSL2       | 0.000001 | 2.682116 |  |
| 12871 | Hematocrit procedure | SOCS5        | 0.000008 | 2.690637 |  |
| 12872 | Hematocrit procedure | ASAM         | 0.000154 | 2.72168  |  |
| 12873 | Hematocrit procedure | PMAIP1       | 0.000012 | 2.735515 |  |
| 12874 | Hematocrit procedure | DZIP1L       | 0.000008 | 2.745394 |  |
| 12875 | Hematocrit procedure | PSMD3        | 0.000273 | 2.784817 |  |
| 12876 | Hematocrit procedure | NIPSNAP1     | 0.000006 | 2.789355 |  |
| 12877 | Hematocrit procedure | ADAM32       | 0.000228 | 2.80424  |  |
| 12878 | Hematocrit procedure | MFGE8        | 0.000003 | 2.808922 |  |
| 12879 | Hematocrit procedure | SFI1         | 0.000028 | 2.810339 |  |
| 12880 | Hematocrit procedure | MAP4         | 0.000005 | 2.832426 |  |
| 12881 | Hematocrit procedure | HEMK1        | 0.000041 | 2.837929 |  |
| 12882 | Hematocrit procedure | GCAT         | 0.00009  | 2.839744 |  |
| 12883 | Hematocrit procedure | CYP2U1       | 0.000128 | 2.843941 |  |
| 12884 | Hematocrit procedure | EPOR         | 0.000069 | 2.845683 |  |
| 12885 | Hematocrit procedure | TANC2        | 0.00003  | 2.848808 |  |
| 12886 | Hematocrit procedure | SMN1         | 0.000003 | 2.86054  |  |
| 12887 | Hematocrit procedure | JAZF1        | 0.000058 | 2.866248 |  |
| 12888 | Hematocrit procedure | 3-Sep        | 0.000009 | 2.871437 |  |
| 12889 | Hematocrit procedure | COL18A1      | 0.000011 | 2.87342  |  |
| 12890 | Hematocrit procedure | ANKRD18A     | 0.000249 | 2.876288 |  |
| 12891 | Hematocrit procedure | ZNF25        | 0.000031 | 2.880115 |  |
| 12892 | Hematocrit procedure | GTF2H2       | 0.000295 | 2.882074 |  |
| 12893 | Hematocrit procedure | TNFAIP8L1    | 0.000026 | 2.906807 |  |
| 12894 | Hematocrit procedure | ACTR3B       | 0.000004 | 2.920274 |  |
| 12895 | Hematocrit procedure | STAT4        | 0.000066 | 2.930509 |  |
| 12896 | Hematocrit procedure | SLC38A2      | 0.000011 | 2.939973 |  |
| 12897 | Hematocrit procedure | LOC100132153 | 0.000003 | 2.945493 |  |
| 12898 | Hematocrit procedure | SFRS1        | 0.000059 | 2.952906 |  |

|       |                      |           |          |          |  |
|-------|----------------------|-----------|----------|----------|--|
| 12899 | Hematocrit procedure | LOC54492  | 0.000069 | 2.953109 |  |
| 12900 | Hematocrit procedure | PAQR6     | 0.000747 | 2.958059 |  |
| 12901 | Hematocrit procedure | SYTL1     | 0.000103 | 2.96032  |  |
| 12902 | Hematocrit procedure | ATP2A1    | 0.000012 | 2.963659 |  |
| 12903 | Hematocrit procedure | CNTNAP1   | 0.000028 | 2.966271 |  |
| 12904 | Hematocrit procedure | SNX26     | 0.000022 | 2.967364 |  |
| 12905 | Hematocrit procedure | ZNF37A    | 0.000218 | 2.970766 |  |
| 12906 | Hematocrit procedure | RAB18     | 0.000004 | 2.978612 |  |
| 12907 | Hematocrit procedure | NPHP1     | 0.000147 | 2.986739 |  |
| 12908 | Hematocrit procedure | AGPAT4    | 0.000168 | 2.989244 |  |
| 12909 | Hematocrit procedure | SEMA4F    | 0.000162 | 2.992848 |  |
| 12910 | Hematocrit procedure | SCG5      | 0.00013  | 2.997883 |  |
| 12911 | Hematocrit procedure | CNNM2     | 0.000001 | 3.007572 |  |
| 12912 | Hematocrit procedure | ADORA1    | 0.000019 | 3.012767 |  |
| 12913 | Hematocrit procedure | CYB5B     | 0.000002 | 3.022785 |  |
| 12914 | Hematocrit procedure | HYLS1     | 0.000139 | 3.023997 |  |
| 12915 | Hematocrit procedure | BCYRN1    | 0.000048 | 3.029967 |  |
| 12916 | Hematocrit procedure | LOC728047 | 0.000131 | 3.034422 |  |
| 12917 | Hematocrit procedure | CAMK1     | 0.000151 | 3.043395 |  |
| 12918 | Hematocrit procedure | SLC30A4   | 0.00002  | 3.072022 |  |
| 12919 | Hematocrit procedure | C14orf4   | 0.000018 | 3.089096 |  |
| 12920 | Hematocrit procedure | SRSF6     | 0.000848 | 3.092448 |  |
| 12921 | Hematocrit procedure | RAPGEF2   | 0.000289 | 3.095119 |  |
| 12922 | Hematocrit procedure | KIAA1586  | 0.000186 | 3.096102 |  |
| 12923 | Hematocrit procedure | ELAVL1    | 0.000008 | 3.112688 |  |
| 12924 | Hematocrit procedure | SIM2      | 0.000077 | 3.115892 |  |
| 12925 | Hematocrit procedure | MAP3K3    | 0.000158 | 3.117407 |  |
| 12926 | Hematocrit procedure | USP45     | 0.000223 | 3.118887 |  |
| 12927 | Hematocrit procedure | CDRT4     | 0.000142 | 3.126199 |  |
| 12928 | Hematocrit procedure | SRGAP1    | 0.000261 | 3.134377 |  |
| 12929 | Hematocrit procedure | LPHN1     | 0.000201 | 3.149025 |  |
| 12930 | Hematocrit procedure | FRAS1     | 0.000002 | 3.150037 |  |
| 12931 | Hematocrit procedure | PARD3     | 0.000219 | 3.173436 |  |
| 12932 | Hematocrit procedure | CDH3      | 0.000159 | 3.193304 |  |
| 12933 | Hematocrit procedure | C2orf27   | 0.000148 | 3.202568 |  |
| 12934 | Hematocrit procedure | CR2       | 0.000124 | 3.206954 |  |
| 12935 | Hematocrit procedure | PBX1      | 0.000126 | 3.218884 |  |
| 12936 | Hematocrit procedure | CA11      | 0.000016 | 3.221219 |  |
| 12937 | Hematocrit procedure | GDI1      | 0.000006 | 3.232506 |  |
| 12938 | Hematocrit procedure | RAB36     | 0.00001  | 3.238865 |  |
| 12939 | Hematocrit procedure | TPBG      | 0.000069 | 3.240437 |  |
| 12940 | Hematocrit procedure | C3orf35   | 0.000084 | 3.24477  |  |
| 12941 | Hematocrit procedure | CST6      | 0.000119 | 3.246943 |  |
| 12942 | Hematocrit procedure | TAB2      | 0.000007 | 3.280706 |  |
| 12943 | Hematocrit procedure | KIAA1797  | 0.000023 | 3.287566 |  |
| 12944 | Hematocrit procedure | AP3S1     | 0.000001 | 3.304655 |  |
| 12945 | Hematocrit procedure | LTBP3     | 0.000008 | 3.322505 |  |
| 12946 | Hematocrit procedure | GDA       | 0.000005 | 3.335761 |  |
| 12947 | Hematocrit procedure | LOC375190 | 0.000135 | 3.342036 |  |
| 12948 | Hematocrit procedure | MDM4      | 0.00027  | 3.347505 |  |

|       |                      |             |          |          |  |
|-------|----------------------|-------------|----------|----------|--|
| 12949 | Hematocrit procedure | NKIRAS1     | 0.000187 | 3.347774 |  |
| 12950 | Hematocrit procedure | CTTNBP2     | 0.000056 | 3.361674 |  |
| 12951 | Hematocrit procedure | C21orf63    | 0.000093 | 3.38271  |  |
| 12952 | Hematocrit procedure | HMSD        | 0.000144 | 3.407395 |  |
| 12953 | Hematocrit procedure | PKD1        | 0.000026 | 3.407801 |  |
| 12954 | Hematocrit procedure | GNB3        | 0.000037 | 3.409344 |  |
| 12955 | Hematocrit procedure | ANO8        | 0.000039 | 3.444012 |  |
| 12956 | Hematocrit procedure | CLTCL1      | 0.000153 | 3.469274 |  |
| 12957 | Hematocrit procedure | TBCEL       | 0.000057 | 3.487617 |  |
| 12958 | Hematocrit procedure | SHANK3      | 0.000095 | 3.507346 |  |
| 12959 | Hematocrit procedure | BTN2A3      | 0.000207 | 3.524927 |  |
| 12960 | Hematocrit procedure | KATNAL1     | 0        | 3.558586 |  |
| 12961 | Hematocrit procedure | ACTA2       | 0.000025 | 3.569658 |  |
| 12962 | Hematocrit procedure | VWDE        | 0.000006 | 3.608694 |  |
| 12963 | Hematocrit procedure | FLJ40113    | 0.000202 | 3.623957 |  |
| 12964 | Hematocrit procedure | GMPR        | 0.000117 | 3.634325 |  |
| 12965 | Hematocrit procedure | CUEDC2      | 0.000005 | 3.636746 |  |
| 12966 | Hematocrit procedure | EXOG        | 0.000269 | 3.658182 |  |
| 12967 | Hematocrit procedure | MYBL1       | 0.000015 | 3.678576 |  |
| 12968 | Hematocrit procedure | LOC201229   | 0.000041 | 3.693565 |  |
| 12969 | Hematocrit procedure | PPP3CA      | 0.000011 | 3.71873  |  |
| 12970 | Hematocrit procedure | LOC286440   | 0.000021 | 3.725239 |  |
| 12971 | Hematocrit procedure | LATS2       | 0.000002 | 3.740308 |  |
| 12972 | Hematocrit procedure | HECTD2      | 0.000301 | 3.764647 |  |
| 12973 | Hematocrit procedure | RAB6B       | 0.000009 | 3.773154 |  |
| 12974 | Hematocrit procedure | TSPAN4      | 0.000089 | 3.774971 |  |
| 12975 | Hematocrit procedure | ZNF280B     | 0.000144 | 3.80754  |  |
| 12976 | Hematocrit procedure | PPP2R3A     | 0.000143 | 3.81687  |  |
| 12977 | Hematocrit procedure | B3GNT4      | 0.000147 | 3.817794 |  |
| 12978 | Hematocrit procedure | CCDC136     | 0.000043 | 3.823805 |  |
| 12979 | Hematocrit procedure | DMKN        | 0.000003 | 3.83423  |  |
| 12980 | Hematocrit procedure | NMT2        | 0.000124 | 3.841508 |  |
| 12981 | Hematocrit procedure | RNF125      | 0.000073 | 3.89468  |  |
| 12982 | Hematocrit procedure | GLI2        | 0.000058 | 3.945516 |  |
| 12983 | Hematocrit procedure | MICB        | 0.000177 | 3.966082 |  |
| 12984 | Hematocrit procedure | CYR61       | 0.00002  | 4.046511 |  |
| 12985 | Hematocrit procedure | RPL22L1     | 0.002085 | 4.059774 |  |
| 12986 | Hematocrit procedure | IQCJ-SCHIP1 | 0.000032 | 4.075156 |  |
| 12987 | Hematocrit procedure | HRK         | 0.000005 | 4.082063 |  |
| 12988 | Hematocrit procedure | BEND7       | 0.000105 | 4.084679 |  |
| 12989 | Hematocrit procedure | NHEDC2      | 0.000076 | 4.100033 |  |
| 12990 | Hematocrit procedure | RASGRP1     | 0.000036 | 4.104226 |  |
| 12991 | Hematocrit procedure | TCF7L1      | 0.000005 | 4.135303 |  |
| 12992 | Hematocrit procedure | STOX2       | 0.000011 | 4.16124  |  |
| 12993 | Hematocrit procedure | PAQR7       | 0.000274 | 4.164603 |  |
| 12994 | Hematocrit procedure | N4BP2L2     | 0.000028 | 4.190006 |  |
| 12995 | Hematocrit procedure | MOSC2       | 0.000098 | 4.225067 |  |
| 12996 | Hematocrit procedure | ATP6AP1L    | 0.00001  | 4.29516  |  |
| 12997 | Hematocrit procedure | ADRBK2      | 0.000104 | 4.356837 |  |
| 12998 | Hematocrit procedure | AMZ2        | 0.000023 | 4.439814 |  |

|       |                      |          |          |          |  |
|-------|----------------------|----------|----------|----------|--|
| 12999 | Hematocrit procedure | MPP2     | 0.000017 | 4.450212 |  |
| 13000 | Hematocrit procedure | SNX10    | 0.000152 | 4.466907 |  |
| 13001 | Hematocrit procedure | FYCO1    | 0.000012 | 4.546863 |  |
| 13002 | Hematocrit procedure | MRC2     | 0        | 4.548474 |  |
| 13003 | Hematocrit procedure | EZR      | 0.000008 | 4.57178  |  |
| 13004 | Hematocrit procedure | ZNF204   | 0.000048 | 4.619756 |  |
| 13005 | Hematocrit procedure | EMID1    | 0.000209 | 4.622975 |  |
| 13006 | Hematocrit procedure | CTNNB1   | 0.000071 | 4.646194 |  |
| 13007 | Hematocrit procedure | GPR161   | 0.000053 | 4.663312 |  |
| 13008 | Hematocrit procedure | NUAK1    | 0        | 4.697471 |  |
| 13009 | Hematocrit procedure | DRAM1    | 0.000091 | 4.728488 |  |
| 13010 | Hematocrit procedure | HOMER3   | 0.00047  | 4.729957 |  |
| 13011 | Hematocrit procedure | DBP      | 0.000005 | 4.750197 |  |
| 13012 | Hematocrit procedure | TTC18    | 0.000014 | 4.779103 |  |
| 13013 | Hematocrit procedure | HNRNPH3  | 0.000111 | 4.787262 |  |
| 13014 | Hematocrit procedure | DRAM     | 0.000021 | 4.800351 |  |
| 13015 | Hematocrit procedure | KLHL5    | 0.000051 | 4.830654 |  |
| 13016 | Hematocrit procedure | CDGAP    | 0.000124 | 4.857344 |  |
| 13017 | Hematocrit procedure | SLC36A4  | 0.000253 | 4.881939 |  |
| 13018 | Hematocrit procedure | STARD9   | 0.000098 | 4.914114 |  |
| 13019 | Hematocrit procedure | FZD3     | 0.000009 | 5.022363 |  |
| 13020 | Hematocrit procedure | CCNG2    | 0.00001  | 5.12713  |  |
| 13021 | Hematocrit procedure | SCHIP1   | 0.000259 | 5.146005 |  |
| 13022 | Hematocrit procedure | KCNIP2   | 0.000285 | 5.252706 |  |
| 13023 | Hematocrit procedure | FLJ43276 | 0.000069 | 5.270924 |  |
| 13024 | Hematocrit procedure | SMURF2   | 0.000008 | 5.287704 |  |
| 13025 | Hematocrit procedure | CCDC46   | 0.00003  | 5.297978 |  |
| 13026 | Hematocrit procedure | BBS5     | 0.000036 | 5.299647 |  |
| 13027 | Hematocrit procedure | BEND6    | 0.000005 | 5.306019 |  |
| 13028 | Hematocrit procedure | SLC16A9  | 0.000163 | 5.333557 |  |
| 13029 | Hematocrit procedure | C6orf204 | 0.00008  | 5.372437 |  |
| 13030 | Hematocrit procedure | RNF141   | 0.000002 | 5.403097 |  |
| 13031 | Hematocrit procedure | PCDHA1   | 0.00001  | 5.429812 |  |
| 13032 | Hematocrit procedure | DENND2C  | 0.000007 | 5.481683 |  |
| 13033 | Hematocrit procedure | ASPHD1   | 0.00001  | 5.58353  |  |
| 13034 | Hematocrit procedure | POLN     | 0.000006 | 5.62979  |  |
| 13035 | Hematocrit procedure | PARD6G   | 0.000031 | 5.80562  |  |
| 13036 | Hematocrit procedure | LRRC8C   | 0.000016 | 5.817699 |  |
| 13037 | Hematocrit procedure | FAM7A1   | 0.000016 | 5.890325 |  |
| 13038 | Hematocrit procedure | MT1H     | 0.001681 | 5.914393 |  |
| 13039 | Hematocrit procedure | MLF1     | 0.00001  | 5.942251 |  |
| 13040 | Hematocrit procedure | NCS1     | 0.000008 | 5.978362 |  |
| 13041 | Hematocrit procedure | COL6A2   | 0.000005 | 6.07294  |  |
| 13042 | Hematocrit procedure | COL11A2  | 0.000016 | 6.081678 |  |
| 13043 | Hematocrit procedure | MID2     | 0.000003 | 6.122492 |  |
| 13044 | Hematocrit procedure | MAP1B    | 0.000008 | 6.150958 |  |
| 13045 | Hematocrit procedure | UTRN     | 0.000091 | 6.151177 |  |
| 13046 | Hematocrit procedure | PTPRU    | 0.000007 | 6.177564 |  |
| 13047 | Hematocrit procedure | SCN8A    | 0.000041 | 6.225373 |  |
| 13048 | Hematocrit procedure | DIP2C    | 0        | 6.344517 |  |



|       |                      |           |          |           |  |
|-------|----------------------|-----------|----------|-----------|--|
| 13049 | Hematocrit procedure | RASSF8    | 0.000153 | 6.447505  |  |
| 13050 | Hematocrit procedure | TMOD2     | 0.000008 | 6.46977   |  |
| 13051 | Hematocrit procedure | PSMG1     | 0.000091 | 6.486989  |  |
| 13052 | Hematocrit procedure | KIAA1920  | 0.000002 | 6.572179  |  |
| 13053 | Hematocrit procedure | AP1S3     | 0.000004 | 6.665484  |  |
| 13054 | Hematocrit procedure | PRKAR2B   | 0.000163 | 6.727933  |  |
| 13055 | Hematocrit procedure | CHRFAM7A  | 0.000021 | 6.761782  |  |
| 13056 | Hematocrit procedure | NEO1      | 0.000007 | 6.778429  |  |
| 13057 | Hematocrit procedure | DPYD      | 0.000008 | 6.845269  |  |
| 13058 | Hematocrit procedure | NAV3      | 0.000008 | 7.051791  |  |
| 13059 | Hematocrit procedure | CLDND1    | 0.000003 | 7.055015  |  |
| 13060 | Hematocrit procedure | EMP3      | 0.000002 | 7.129033  |  |
| 13061 | Hematocrit procedure | ANXA6     | 0.000111 | 7.199033  |  |
| 13062 | Hematocrit procedure | LOC51233  | 0        | 7.282324  |  |
| 13063 | Hematocrit procedure | RECK      | 0        | 7.333833  |  |
| 13064 | Hematocrit procedure | RHOQ      | 0.000001 | 7.383621  |  |
| 13065 | Hematocrit procedure | MYL9      | 0.000004 | 7.687039  |  |
| 13066 | Hematocrit procedure | GPR98     | 0.000043 | 7.791575  |  |
| 13067 | Hematocrit procedure | LOC643792 | 0.000011 | 7.85897   |  |
| 13068 | Hematocrit procedure | FLJ33996  | 0.000136 | 7.914756  |  |
| 13069 | Hematocrit procedure | PITPNC1   | 0.00001  | 7.945857  |  |
| 13070 | Hematocrit procedure | TTLL7     | 0.00022  | 7.996952  |  |
| 13071 | Hematocrit procedure | PKIG      | 0.000094 | 8.099702  |  |
| 13072 | Hematocrit procedure | LOC648795 | 0.00003  | 8.118847  |  |
| 13073 | Hematocrit procedure | LOC440302 | 0.000016 | 8.285117  |  |
| 13074 | Hematocrit procedure | PALLD     | 0.000005 | 8.486156  |  |
| 13075 | Hematocrit procedure | TTC7B     | 0.000076 | 8.657179  |  |
| 13076 | Hematocrit procedure | TLE2      | 0        | 8.702231  |  |
| 13077 | Hematocrit procedure | NME4      | 0.000007 | 9.047245  |  |
| 13078 | Hematocrit procedure | CFD       | 0.000004 | 9.061576  |  |
| 13079 | Hematocrit procedure | F2RL1     | 0.000003 | 9.207135  |  |
| 13080 | Hematocrit procedure | C9orf72   | 0.000004 | 10.188588 |  |
| 13081 | Hematocrit procedure | MARK1     | 0        | 10.217503 |  |
| 13082 | Hematocrit procedure | FAM7A3    | 0.000024 | 10.252432 |  |
| 13083 | Hematocrit procedure | KLK7      | 0        | 10.412573 |  |
| 13084 | Hematocrit procedure | CCNDBP1   | 0.000226 | 10.62795  |  |
| 13085 | Hematocrit procedure | GPX8      | 0.000005 | 10.645534 |  |
| 13086 | Hematocrit procedure | BDNF      | 0.000006 | 10.742728 |  |
| 13087 | Hematocrit procedure | NFIC      | 0.000009 | 10.751284 |  |
| 13088 | Hematocrit procedure | PTPN13    | 0.000013 | 11.195711 |  |
| 13089 | Hematocrit procedure | MFAP2     | 0.000003 | 11.296665 |  |
| 13090 | Hematocrit procedure | ZNF618    | 0.000012 | 11.312275 |  |
| 13091 | Hematocrit procedure | ADAP2     | 0        | 11.396105 |  |
| 13092 | Hematocrit procedure | RNF217    | 0.00002  | 11.55933  |  |
| 13093 | Hematocrit procedure | LAPTM4B   | 0        | 12.015325 |  |
| 13094 | Hematocrit procedure | MCOLN3    | 0.000004 | 12.019836 |  |
| 13095 | Hematocrit procedure | SYTL3     | 0.000004 | 12.586998 |  |
| 13096 | Hematocrit procedure | FBXO44    | 0.000015 | 12.898193 |  |
| 13097 | Hematocrit procedure | MT2A      | 0.000012 | 13.177214 |  |
| 13098 | Hematocrit procedure | SLC16A14  | 0.000003 | 13.373653 |  |

|       |                      |           |          |            |  |
|-------|----------------------|-----------|----------|------------|--|
| 13099 | Hematocrit procedure | SMARCD3   | 0        | 15.594032  |  |
| 13100 | Hematocrit procedure | KLHL13    | 0.000003 | 15.91222   |  |
| 13101 | Hematocrit procedure | CYBRD1    | 0.000011 | 15.955871  |  |
| 13102 | Hematocrit procedure | KISS1R    | 0.000054 | 16.026044  |  |
| 13103 | Hematocrit procedure | MKX       | 0.000031 | 16.252809  |  |
| 13104 | Hematocrit procedure | CSAG2     | 0.000003 | 16.47408   |  |
| 13105 | Hematocrit procedure | EML1      | 0        | 16.504361  |  |
| 13106 | Hematocrit procedure | RBPM52    | 0.000266 | 16.968109  |  |
| 13107 | Hematocrit procedure | SSFA2     | 0.000004 | 18.763377  |  |
| 13108 | Hematocrit procedure | PPP1R9A   | 0.000008 | 19.038244  |  |
| 13109 | Hematocrit procedure | IFITM3    | 0.000002 | 19.187446  |  |
| 13110 | Hematocrit procedure | RAB38     | 0        | 21.45702   |  |
| 13111 | Hematocrit procedure | NOV       | 0.000004 | 21.833935  |  |
| 13112 | Hematocrit procedure | FERMT2    | 0.000004 | 22.008593  |  |
| 13113 | Hematocrit procedure | ZNF385B   | 0.000001 | 23.716727  |  |
| 13114 | Hematocrit procedure | MAGEA12   | 0.000007 | 24.113279  |  |
| 13115 | Hematocrit procedure | MSI1      | 0.000005 | 24.721362  |  |
| 13116 | Hematocrit procedure | GPAT2     | 0.000007 | 25.125105  |  |
| 13117 | Hematocrit procedure | RRAGD     | 0.000011 | 25.191409  |  |
| 13118 | Hematocrit procedure | SCARA3    | 0.000003 | 25.93522   |  |
| 13119 | Hematocrit procedure | EPB41L2   | 0.000011 | 26.226904  |  |
| 13120 | Hematocrit procedure | SMARCA1   | 0.000004 | 27.270593  |  |
| 13121 | Hematocrit procedure | RAB12     | 0.000004 | 27.617611  |  |
| 13122 | Hematocrit procedure | UBE2E2    | 0.000004 | 29.738673  |  |
| 13123 | Hematocrit procedure | NR3C1     | 0.000003 | 31.321162  |  |
| 13124 | Hematocrit procedure | COL12A1   | 0.000005 | 31.924422  |  |
| 13125 | Hematocrit procedure | MEF2C     | 0        | 33.319674  |  |
| 13126 | Hematocrit procedure | ANXA10    | 0.000003 | 40.771601  |  |
| 13127 | Hematocrit procedure | TBC1D9    | 0.000002 | 41.505718  |  |
| 13128 | Hematocrit procedure | ANTXR1    | 0.000001 | 49.218279  |  |
| 13129 | Hematocrit procedure | FMNL2     | 0        | 54.602674  |  |
| 13130 | Hematocrit procedure | SELM      | 0.000003 | 60.753264  |  |
| 13131 | Hematocrit procedure | GLUL      | 0.000003 | 60.819892  |  |
| 13132 | Hematocrit procedure | PLA2G4A   | 0.000004 | 63.232318  |  |
| 13133 | Hematocrit procedure | PDP1      | 0        | 64.485389  |  |
| 13134 | Hematocrit procedure | PVRL3     | 0.000006 | 68.00041   |  |
| 13135 | Hematocrit procedure | WNT16     | 0.000003 | 72.070133  |  |
| 13136 | Hematocrit procedure | NPW       | 0.000004 | 75.322469  |  |
| 13137 | Hematocrit procedure | TMEM200A  | 0.000008 | 79.055071  |  |
| 13138 | Hematocrit procedure | PDE4B     | 0.000008 | 81.362804  |  |
| 13139 | Hematocrit procedure | CD55      | 0.000008 | 85.609602  |  |
| 13140 | Hematocrit procedure | ENAH      | 0.000001 | 87.225685  |  |
| 13141 | Hematocrit procedure | LOC399959 | 0.000008 | 91.493939  |  |
| 13142 | Hematocrit procedure | HBE1      | 0.000005 | 95.940684  |  |
| 13143 | Hematocrit procedure | SCG2      | 0.000007 | 97.219518  |  |
| 13144 | Hematocrit procedure | GPR110    | 0.00001  | 119.33262  |  |
| 13145 | Hematocrit procedure | MAGEA2    | 0.000003 | 195.042669 |  |
| 13146 | Hematocrit procedure | CALD1     | 0.000002 | 236.177902 |  |
| 13147 | Hematocrit procedure | GNAI1     | 0        | 249.518455 |  |
| 13148 | Hematocrit procedure | MAGEA3    | 0        | 286.243733 |  |

|       |                                              |           |          |            |  |
|-------|----------------------------------------------|-----------|----------|------------|--|
| 13149 | Hematocrit procedure                         | MAGEB2    | 0        | 317.484128 |  |
| 13150 | Hematocrit procedure                         | TUBA1A    | 0        | 362.306283 |  |
| 13151 | Hematocrit procedure                         | ALDH1A3   | 0.000006 | 365.306613 |  |
| 13152 | Hematocrit procedure                         | PCDH7     | 0.000001 | 387.281575 |  |
| 13153 | Hematocrit procedure                         | GTSF1     | 0.000008 | 399.301718 |  |
| 13154 | Hematocrit procedure                         | DKK1      | 0        | 561.358383 |  |
| 13155 | Hematocrit procedure                         | ARHGAP29  | 0.000004 | 574.399087 |  |
| 13156 | Hemorrhage                                   | XIST      | 0        | 1.799884   |  |
| 13157 | Hereditary Malignant Neoplasm                | NXF3      | 0.000001 | -6.077497  |  |
| 13158 | Hereditary Malignant Neoplasm                | TRIM7     | 0.000001 | -4.303554  |  |
| 13159 | Hereditary Malignant Neoplasm                | PLA2G3    | 0.001088 | -3.170196  |  |
| 13160 | Hereditary Malignant Neoplasm                | SEMG1     | 0.000982 | -3.09763   |  |
| 13161 | Hereditary Malignant Neoplasm                | AGR3      | 0        | -2.876189  |  |
| 13162 | Hereditary Malignant Neoplasm                | TFAP2A    | 0.000005 | -2.665646  |  |
| 13163 | Hereditary Malignant Neoplasm                | FOXA1     | 0.000001 | -2.631543  |  |
| 13164 | Hereditary Malignant Neoplasm                | GNLY      | 0.000026 | -2.468766  |  |
| 13165 | Hereditary Malignant Neoplasm                | HOXC6     | 0        | -2.38922   |  |
| 13166 | Hereditary Malignant Neoplasm                | C19orf51  | 0.000122 | -2.378922  |  |
| 13167 | Hereditary Malignant Neoplasm                | LILRA3    | 0.000194 | -2.361116  |  |
| 13168 | Hereditary Malignant Neoplasm                | TNFSF9    | 0.000129 | -2.313163  |  |
| 13169 | Hereditary Malignant Neoplasm                | PLAC8     | 0.000527 | -2.301019  |  |
| 13170 | Hereditary Malignant Neoplasm                | PBK       | 0        | -2.2508    |  |
| 13171 | Hereditary Malignant Neoplasm                | NUDT6     | 0.000072 | -2.231892  |  |
| 13172 | Hereditary Malignant Neoplasm                | CD164L2   | 0.000687 | -2.217661  |  |
| 13173 | Hereditary Malignant Neoplasm                | NOS2A     | 0.000687 | -2.171185  |  |
| 13174 | Hereditary Malignant Neoplasm                | PFKP      | 0.000063 | -2.11219   |  |
| 13175 | Hereditary Malignant Neoplasm                | LYPD5     | 0.00004  | -2.106908  |  |
| 13176 | Hereditary Malignant Neoplasm                | GZMA      | 0.000347 | -2.097267  |  |
| 13177 | Hereditary Malignant Neoplasm                | DEGS2     | 0.001158 | -2.084829  |  |
| 13178 | Hereditary Malignant Neoplasm                | C11orf9   | 0.000869 | -2.081439  |  |
| 13179 | Hereditary Malignant Neoplasm                | C19orf23  | 0.000238 | -2.055148  |  |
| 13180 | Hereditary Malignant Neoplasm                | GAD1      | 0.000302 | -2.051646  |  |
| 13181 | Hereditary Malignant Neoplasm                | GAR1      | 0.000026 | -2.026844  |  |
| 13182 | Hereditary Malignant Neoplasm                | PON3      | 0.000063 | 2.032295   |  |
| 13183 | Hereditary Malignant Neoplasm                | POFUT1    | 0.000045 | 2.045593   |  |
| 13184 | Hereditary Malignant Neoplasm                | CIB2      | 0.00111  | 2.052749   |  |
| 13185 | Hereditary Malignant Neoplasm                | C20orf117 | 0.000266 | 2.068023   |  |
| 13186 | Hereditary Malignant Neoplasm                | NOX1      | 0.001    | 2.082522   |  |
| 13187 | Hereditary Malignant Neoplasm                | HOXA3     | 0.000247 | 2.119229   |  |
| 13188 | Hereditary Malignant Neoplasm                | CEL       | 0.000912 | 2.141374   |  |
| 13189 | Hereditary Malignant Neoplasm                | GRM8      | 0.000045 | 2.290591   |  |
| 13190 | Hereditary Malignant Neoplasm                | PLA2G12B  | 0.000802 | 2.930102   |  |
| 13191 | Hereditary Malignant Neoplasm                | KRT23     | 0.001    | 3.691753   |  |
| 13192 | Hereditary Non-Polyposis Colon Cancer Type 1 | KRT23     | 0.01294  | -3.193564  |  |
| 13193 | Hereditary Non-Polyposis Colon Cancer Type 1 | SLC22A11  | 0.035716 | -3.132747  |  |
| 13194 | Hereditary Non-Polyposis Colon Cancer Type 1 | F7        | 0.009004 | -3.058259  |  |
| 13195 | Hereditary Non-Polyposis Colon Cancer Type 1 | PKLR      | 0.009334 | -2.823042  |  |
| 13196 | Hereditary Non-Polyposis Colon Cancer Type 1 | PPP2R2C   | 0.012359 | -2.663028  |  |
| 13197 | Hereditary Non-Polyposis Colon Cancer Type 1 | PIWIL1    | 0.03469  | -2.641758  |  |
| 13198 | Hereditary Non-Polyposis Colon Cancer Type 1 | NODAL     | 0.004931 | -2.566286  |  |

|       |                                              |            |          |            |  |
|-------|----------------------------------------------|------------|----------|------------|--|
| 13199 | Hereditary Non-Polyposis Colon Cancer Type 1 | PAH        | 0.011581 | -2.565458  |  |
| 13200 | Hereditary Non-Polyposis Colon Cancer Type 1 | PLA2G12B   | 0.022296 | -2.562045  |  |
| 13201 | Hereditary Non-Polyposis Colon Cancer Type 1 | UMODL1     | 0.002468 | -2.519158  |  |
| 13202 | Hereditary Non-Polyposis Colon Cancer Type 1 | NOX1       | 0.000276 | -2.476758  |  |
| 13203 | Hereditary Non-Polyposis Colon Cancer Type 1 | GRM8       | 0.000276 | -2.453255  |  |
| 13204 | Hereditary Non-Polyposis Colon Cancer Type 1 | C6orf15    | 0.022668 | -2.449986  |  |
| 13205 | Hereditary Non-Polyposis Colon Cancer Type 1 | PCP4       | 0.010349 | -2.336584  |  |
| 13206 | Hereditary Non-Polyposis Colon Cancer Type 1 | GAS2       | 0.000014 | -2.302761  |  |
| 13207 | Hereditary Non-Polyposis Colon Cancer Type 1 | NKD1       | 0.003627 | -2.224193  |  |
| 13208 | Hereditary Non-Polyposis Colon Cancer Type 1 | KRT6B      | 0.028373 | -2.206861  |  |
| 13209 | Hereditary Non-Polyposis Colon Cancer Type 1 | CEL        | 0.019019 | -2.072682  |  |
| 13210 | Hereditary Non-Polyposis Colon Cancer Type 1 | PON3       | 0.000276 | -2.042103  |  |
| 13211 | Hereditary Non-Polyposis Colon Cancer Type 1 | RERGL      | 0.035657 | -2.0279    |  |
| 13212 | Hereditary Non-Polyposis Colon Cancer Type 1 | HOXA3      | 0.006324 | -2.012612  |  |
| 13213 | Hereditary Non-Polyposis Colon Cancer Type 1 | BNIP3      | 0.008021 | 2.029302   |  |
| 13214 | Hereditary Non-Polyposis Colon Cancer Type 1 | KCNG3      | 0.038146 | 2.101529   |  |
| 13215 | Hereditary Non-Polyposis Colon Cancer Type 1 | NCRNA00173 | 0.027758 | 2.148351   |  |
| 13216 | Hereditary Nonpolyposis Colorectal Neoplasms | KRT23      | 0.01294  | -3.193564  |  |
| 13217 | Hereditary Nonpolyposis Colorectal Neoplasms | SLC22A11   | 0.035716 | -3.132747  |  |
| 13218 | Hereditary Nonpolyposis Colorectal Neoplasms | F7         | 0.009004 | -3.058259  |  |
| 13219 | Hereditary Nonpolyposis Colorectal Neoplasms | PKLR       | 0.009334 | -2.823042  |  |
| 13220 | Hereditary Nonpolyposis Colorectal Neoplasms | PPP2R2C    | 0.012359 | -2.663028  |  |
| 13221 | Hereditary Nonpolyposis Colorectal Neoplasms | PIWIL1     | 0.03469  | -2.641758  |  |
| 13222 | Hereditary Nonpolyposis Colorectal Neoplasms | NODAL      | 0.004931 | -2.566286  |  |
| 13223 | Hereditary Nonpolyposis Colorectal Neoplasms | PAH        | 0.011581 | -2.565458  |  |
| 13224 | Hereditary Nonpolyposis Colorectal Neoplasms | PLA2G12B   | 0.022296 | -2.562045  |  |
| 13225 | Hereditary Nonpolyposis Colorectal Neoplasms | UMODL1     | 0.002468 | -2.519158  |  |
| 13226 | Hereditary Nonpolyposis Colorectal Neoplasms | NOX1       | 0.000276 | -2.476758  |  |
| 13227 | Hereditary Nonpolyposis Colorectal Neoplasms | GRM8       | 0.000276 | -2.453255  |  |
| 13228 | Hereditary Nonpolyposis Colorectal Neoplasms | C6orf15    | 0.022668 | -2.449986  |  |
| 13229 | Hereditary Nonpolyposis Colorectal Neoplasms | PCP4       | 0.010349 | -2.336584  |  |
| 13230 | Hereditary Nonpolyposis Colorectal Neoplasms | GAS2       | 0.000014 | -2.302761  |  |
| 13231 | Hereditary Nonpolyposis Colorectal Neoplasms | NKD1       | 0.003627 | -2.224193  |  |
| 13232 | Hereditary Nonpolyposis Colorectal Neoplasms | KRT6B      | 0.028373 | -2.206861  |  |
| 13233 | Hereditary Nonpolyposis Colorectal Neoplasms | CEL        | 0.019019 | -2.072682  |  |
| 13234 | Hereditary Nonpolyposis Colorectal Neoplasms | PON3       | 0.000276 | -2.042103  |  |
| 13235 | Hereditary Nonpolyposis Colorectal Neoplasms | RERGL      | 0.035657 | -2.0279    |  |
| 13236 | Hereditary Nonpolyposis Colorectal Neoplasms | HOXA3      | 0.006324 | -2.012612  |  |
| 13237 | Hereditary Nonpolyposis Colorectal Neoplasms | BNIP3      | 0.008021 | 2.029302   |  |
| 13238 | Hereditary Nonpolyposis Colorectal Neoplasms | KCNG3      | 0.038146 | 2.101529   |  |
| 13239 | Hereditary Nonpolyposis Colorectal Neoplasms | NCRNA00173 | 0.027758 | 2.148351   |  |
| 13240 | Histopathologic Grade differentiation        | LOC253264  | 0.008153 | -37.865909 |  |
| 13241 | Histopathologic Grade differentiation        | CHST11     | 0.025145 | -23.192164 |  |
| 13242 | Histopathologic Grade differentiation        | CHST15     | 0.000027 | -18.940909 |  |
| 13243 | Histopathologic Grade differentiation        | COL6A1     | 0.02114  | -18.382448 |  |
| 13244 | Histopathologic Grade differentiation        | MT1G       | 0.016225 | -17.753374 |  |
| 13245 | Histopathologic Grade differentiation        | FERMT2     | 0.007869 | -17.250729 |  |
| 13246 | Histopathologic Grade differentiation        | AKR1C4     | 0.005756 | -16.076282 |  |
| 13247 | Histopathologic Grade differentiation        | AKR1B1     | 0.004132 | -14.721042 |  |
| 13248 | Histopathologic Grade differentiation        | MAP1B      | 0.000104 | -11.591654 |  |

|       |                                       |              |          |            |  |
|-------|---------------------------------------|--------------|----------|------------|--|
| 13249 | Histopathologic Grade differentiation | PRF1         | 0.026553 | -11.241086 |  |
| 13250 | Histopathologic Grade differentiation | BNIP3        | 0.02154  | -9.573129  |  |
| 13251 | Histopathologic Grade differentiation | A1CF         | 0.030278 | -9.053001  |  |
| 13252 | Histopathologic Grade differentiation | MUC1         | 0.032471 | -8.474978  |  |
| 13253 | Histopathologic Grade differentiation | C3orf67      | 0.000123 | -7.580945  |  |
| 13254 | Histopathologic Grade differentiation | HSPA12A      | 0.004076 | -7.539433  |  |
| 13255 | Histopathologic Grade differentiation | MAOA         | 0.033587 | -7.250366  |  |
| 13256 | Histopathologic Grade differentiation | LOC100288413 | 0.008586 | -7.106915  |  |
| 13257 | Histopathologic Grade differentiation | ARHGEF10     | 0.009609 | -6.871402  |  |
| 13258 | Histopathologic Grade differentiation | PTPRN2       | 0.037953 | -6.863723  |  |
| 13259 | Histopathologic Grade differentiation | GRK5         | 0.031305 | -6.729808  |  |
| 13260 | Histopathologic Grade differentiation | SLC39A5      | 0.029417 | -6.704422  |  |
| 13261 | Histopathologic Grade differentiation | SESN3        | 0.043064 | -6.566215  |  |
| 13262 | Histopathologic Grade differentiation | ESPN         | 0.005169 | -6.53639   |  |
| 13263 | Histopathologic Grade differentiation | ZNF75A       | 0.011872 | -6.492516  |  |
| 13264 | Histopathologic Grade differentiation | FGF9         | 0.013599 | -6.47679   |  |
| 13265 | Histopathologic Grade differentiation | WASF3        | 0.004148 | -6.447774  |  |
| 13266 | Histopathologic Grade differentiation | GGT8P        | 0.00551  | -6.208695  |  |
| 13267 | Histopathologic Grade differentiation | PTPRS        | 0.013452 | -5.796991  |  |
| 13268 | Histopathologic Grade differentiation | ZNF114       | 0.00264  | -5.651843  |  |
| 13269 | Histopathologic Grade differentiation | PDE4A        | 0.000306 | -5.516307  |  |
| 13270 | Histopathologic Grade differentiation | LOC91316     | 0.002145 | -5.371458  |  |
| 13271 | Histopathologic Grade differentiation | NOS3         | 0.026338 | -5.370638  |  |
| 13272 | Histopathologic Grade differentiation | PLIN2        | 0.016907 | -5.28887   |  |
| 13273 | Histopathologic Grade differentiation | SYDE1        | 0.001308 | -5.278165  |  |
| 13274 | Histopathologic Grade differentiation | ATP2A3       | 0.039947 | -5.142808  |  |
| 13275 | Histopathologic Grade differentiation | TM4SF19      | 0.027907 | -5.081657  |  |
| 13276 | Histopathologic Grade differentiation | ESF1         | 0.005882 | -5.079711  |  |
| 13277 | Histopathologic Grade differentiation | ABLIM2       | 0.00801  | -5.067568  |  |
| 13278 | Histopathologic Grade differentiation | AHRR         | 0.019963 | -5.054049  |  |
| 13279 | Histopathologic Grade differentiation | GRIN2B       | 0.013798 | -4.913585  |  |
| 13280 | Histopathologic Grade differentiation | SYT1         | 0.024843 | -4.91192   |  |
| 13281 | Histopathologic Grade differentiation | HLA-DPB1     | 0.005882 | -4.823096  |  |
| 13282 | Histopathologic Grade differentiation | EPHB2        | 0.019271 | -4.790564  |  |
| 13283 | Histopathologic Grade differentiation | RASSF2       | 0.007846 | -4.772242  |  |
| 13284 | Histopathologic Grade differentiation | LASS4        | 0.009769 | -4.739372  |  |
| 13285 | Histopathologic Grade differentiation | SSTR1        | 0.036992 | -4.738777  |  |
| 13286 | Histopathologic Grade differentiation | KCNAB2       | 0.008497 | -4.725273  |  |
| 13287 | Histopathologic Grade differentiation | ARMC4        | 0.040299 | -4.642121  |  |
| 13288 | Histopathologic Grade differentiation | SERPINI1     | 0.016342 | -4.640182  |  |
| 13289 | Histopathologic Grade differentiation | CLDN15       | 0.033587 | -4.63721   |  |
| 13290 | Histopathologic Grade differentiation | EMP3         | 0.007002 | -4.56919   |  |
| 13291 | Histopathologic Grade differentiation | ZNF134       | 0.006982 | -4.523203  |  |
| 13292 | Histopathologic Grade differentiation | TTYH2        | 0.00725  | -4.485478  |  |
| 13293 | Histopathologic Grade differentiation | ARHGAP4      | 0.001865 | -4.477802  |  |
| 13294 | Histopathologic Grade differentiation | LNP1         | 0.002634 | -4.415655  |  |
| 13295 | Histopathologic Grade differentiation | CPPED1       | 0.007628 | -4.414136  |  |
| 13296 | Histopathologic Grade differentiation | CLIP4        | 0.03694  | -4.369098  |  |
| 13297 | Histopathologic Grade differentiation | COL6A2       | 0.023451 | -4.34569   |  |
| 13298 | Histopathologic Grade differentiation | ZNF512       | 0.034731 | -4.342236  |  |

|       |                                       |              |          |           |  |
|-------|---------------------------------------|--------------|----------|-----------|--|
| 13299 | Histopathologic Grade differentiation | PRPS2        | 0.008559 | -4.324613 |  |
| 13300 | Histopathologic Grade differentiation | HDAC4        | 0.025457 | -4.310722 |  |
| 13301 | Histopathologic Grade differentiation | ARAP3        | 0.005753 | -4.304594 |  |
| 13302 | Histopathologic Grade differentiation | ITPRIPL1     | 0.027108 | -4.214905 |  |
| 13303 | Histopathologic Grade differentiation | MSRB3        | 0.040078 | -4.207933 |  |
| 13304 | Histopathologic Grade differentiation | C1orf61      | 0.024543 | -4.1922   |  |
| 13305 | Histopathologic Grade differentiation | GCNT2        | 0.036962 | -4.171809 |  |
| 13306 | Histopathologic Grade differentiation | ZDBF2        | 0.014768 | -4.093295 |  |
| 13307 | Histopathologic Grade differentiation | OBSL1        | 0.041152 | -4.032463 |  |
| 13308 | Histopathologic Grade differentiation | SYTL3        | 0.029295 | -4.026876 |  |
| 13309 | Histopathologic Grade differentiation | TMEM45A      | 0.023014 | -3.954123 |  |
| 13310 | Histopathologic Grade differentiation | CKB          | 0.032381 | -3.887971 |  |
| 13311 | Histopathologic Grade differentiation | MCC          | 0.028644 | -3.844278 |  |
| 13312 | Histopathologic Grade differentiation | MYT1         | 0.036238 | -3.841417 |  |
| 13313 | Histopathologic Grade differentiation | MACC1        | 0.016257 | -3.830158 |  |
| 13314 | Histopathologic Grade differentiation | NAV2         | 0.033281 | -3.805845 |  |
| 13315 | Histopathologic Grade differentiation | B4GALNT1     | 0.028283 | -3.795721 |  |
| 13316 | Histopathologic Grade differentiation | SNAIL        | 0.004793 | -3.78132  |  |
| 13317 | Histopathologic Grade differentiation | RTDR1        | 0.000854 | -3.774219 |  |
| 13318 | Histopathologic Grade differentiation | SMO          | 0.010648 | -3.692875 |  |
| 13319 | Histopathologic Grade differentiation | TRMT12       | 0.011418 | -3.619269 |  |
| 13320 | Histopathologic Grade differentiation | C20orf194    | 0.008142 | -3.578665 |  |
| 13321 | Histopathologic Grade differentiation | FRMD4A       | 0.013394 | -3.554957 |  |
| 13322 | Histopathologic Grade differentiation | LOC100128701 | 0.009055 | -3.547076 |  |
| 13323 | Histopathologic Grade differentiation | B4GALNT4     | 0.001373 | -3.529887 |  |
| 13324 | Histopathologic Grade differentiation | LOC286467    | 0.020403 | -3.529359 |  |
| 13325 | Histopathologic Grade differentiation | FHL1         | 0.040489 | -3.510914 |  |
| 13326 | Histopathologic Grade differentiation | OLFM1        | 0.043427 | -3.405421 |  |
| 13327 | Histopathologic Grade differentiation | MGC3207      | 0.01372  | -3.38984  |  |
| 13328 | Histopathologic Grade differentiation | HMGA2        | 0.028404 | -3.340042 |  |
| 13329 | Histopathologic Grade differentiation | RAC2         | 0.003858 | -3.309574 |  |
| 13330 | Histopathologic Grade differentiation | PEAR1        | 0.031116 | -3.287253 |  |
| 13331 | Histopathologic Grade differentiation | DPYSL4       | 0.006208 | -3.273479 |  |
| 13332 | Histopathologic Grade differentiation | AADAT        | 0.001012 | -3.257492 |  |
| 13333 | Histopathologic Grade differentiation | KLF2         | 0.027738 | -3.249612 |  |
| 13334 | Histopathologic Grade differentiation | DST          | 0.028653 | -3.229441 |  |
| 13335 | Histopathologic Grade differentiation | CKMT1B       | 0.033219 | -3.229426 |  |
| 13336 | Histopathologic Grade differentiation | RGPD1        | 0.028817 | -3.204293 |  |
| 13337 | Histopathologic Grade differentiation | IFRD1        | 0.023079 | -3.202562 |  |
| 13338 | Histopathologic Grade differentiation | ABCB6        | 0.043596 | -3.199229 |  |
| 13339 | Histopathologic Grade differentiation | CCDC153      | 0.014322 | -3.19386  |  |
| 13340 | Histopathologic Grade differentiation | GGT3P        | 0.020489 | -3.158533 |  |
| 13341 | Histopathologic Grade differentiation | UNC13A       | 0.042705 | -3.155158 |  |
| 13342 | Histopathologic Grade differentiation | ATN1         | 0.009915 | -3.135751 |  |
| 13343 | Histopathologic Grade differentiation | PCLO         | 0.004132 | -3.128338 |  |
| 13344 | Histopathologic Grade differentiation | HSD11B2      | 0.009725 | -3.123884 |  |
| 13345 | Histopathologic Grade differentiation | CAPN6        | 0.032802 | -3.113044 |  |
| 13346 | Histopathologic Grade differentiation | FLJ11151     | 0.003437 | -3.0502   |  |
| 13347 | Histopathologic Grade differentiation | ANUBL1       | 0.020611 | -3.035174 |  |
| 13348 | Histopathologic Grade differentiation | NLRP1        | 0.028383 | -3.017563 |  |

|       |                                       |           |          |           |  |
|-------|---------------------------------------|-----------|----------|-----------|--|
| 13349 | Histopathologic Grade differentiation | NIN       | 0.027786 | -3.015769 |  |
| 13350 | Histopathologic Grade differentiation | FGF3      | 0.012817 | -2.990565 |  |
| 13351 | Histopathologic Grade differentiation | LOC643014 | 0.007368 | -2.980847 |  |
| 13352 | Histopathologic Grade differentiation | IRX4      | 0.008801 | -2.974759 |  |
| 13353 | Histopathologic Grade differentiation | SEMA6A    | 0.015628 | -2.956109 |  |
| 13354 | Histopathologic Grade differentiation | DCP1B     | 0.007234 | -2.952423 |  |
| 13355 | Histopathologic Grade differentiation | CUZD1     | 0.025845 | -2.947615 |  |
| 13356 | Histopathologic Grade differentiation | LEPR      | 0.035524 | -2.944764 |  |
| 13357 | Histopathologic Grade differentiation | PTMS      | 0.008879 | -2.937181 |  |
| 13358 | Histopathologic Grade differentiation | DLG4      | 0.001121 | -2.927324 |  |
| 13359 | Histopathologic Grade differentiation | DFNA5     | 0.006773 | -2.915278 |  |
| 13360 | Histopathologic Grade differentiation | STX6      | 0.009915 | -2.900236 |  |
| 13361 | Histopathologic Grade differentiation | MDK       | 0.021198 | -2.894297 |  |
| 13362 | Histopathologic Grade differentiation | KCTD14    | 0.042718 | -2.887407 |  |
| 13363 | Histopathologic Grade differentiation | PGM5P2    | 0.040185 | -2.883112 |  |
| 13364 | Histopathologic Grade differentiation | LAYN      | 0.001336 | -2.882634 |  |
| 13365 | Histopathologic Grade differentiation | PGM5      | 0.008447 | -2.87976  |  |
| 13366 | Histopathologic Grade differentiation | ITGA7     | 0.00857  | -2.857539 |  |
| 13367 | Histopathologic Grade differentiation | ZNF512B   | 0.006008 | -2.853459 |  |
| 13368 | Histopathologic Grade differentiation | ZNF680    | 0.005839 | -2.85288  |  |
| 13369 | Histopathologic Grade differentiation | CPEB4     | 0.001559 | -2.841143 |  |
| 13370 | Histopathologic Grade differentiation | LOC126235 | 0.002112 | -2.84049  |  |
| 13371 | Histopathologic Grade differentiation | DUSP9     | 0.004157 | -2.833412 |  |
| 13372 | Histopathologic Grade differentiation | DNM3      | 0.032381 | -2.799099 |  |
| 13373 | Histopathologic Grade differentiation | FARSB     | 0.0161   | -2.792914 |  |
| 13374 | Histopathologic Grade differentiation | FAM131C   | 0.007119 | -2.791825 |  |
| 13375 | Histopathologic Grade differentiation | L3MBTL3   | 0.038    | -2.78939  |  |
| 13376 | Histopathologic Grade differentiation | FAM83F    | 0.022233 | -2.788021 |  |
| 13377 | Histopathologic Grade differentiation | ANKRD53   | 0.009709 | -2.782743 |  |
| 13378 | Histopathologic Grade differentiation | NEIL1     | 0.042313 | -2.780295 |  |
| 13379 | Histopathologic Grade differentiation | CLGN      | 0.013521 | -2.760418 |  |
| 13380 | Histopathologic Grade differentiation | TLR1      | 0.014957 | -2.735952 |  |
| 13381 | Histopathologic Grade differentiation | BHLHE40   | 0.000853 | -2.71711  |  |
| 13382 | Histopathologic Grade differentiation | IL6R      | 0.033058 | -2.708157 |  |
| 13383 | Histopathologic Grade differentiation | USH1C     | 0.028884 | -2.69668  |  |
| 13384 | Histopathologic Grade differentiation | ZNF323    | 0.035562 | -2.667251 |  |
| 13385 | Histopathologic Grade differentiation | FAM167A   | 0.025073 | -2.662123 |  |
| 13386 | Histopathologic Grade differentiation | VWA5A     | 0.001017 | -2.654796 |  |
| 13387 | Histopathologic Grade differentiation | TET1      | 0.025162 | -2.646146 |  |
| 13388 | Histopathologic Grade differentiation | TNXB      | 0.012499 | -2.645106 |  |
| 13389 | Histopathologic Grade differentiation | TRPV6     | 0.008043 | -2.634322 |  |
| 13390 | Histopathologic Grade differentiation | MMP14     | 0.04116  | -2.632169 |  |
| 13391 | Histopathologic Grade differentiation | CBS       | 0.013784 | -2.625631 |  |
| 13392 | Histopathologic Grade differentiation | GUCY1B2   | 0.013836 | -2.625275 |  |
| 13393 | Histopathologic Grade differentiation | EVX1      | 0.012607 | -2.617924 |  |
| 13394 | Histopathologic Grade differentiation | TPRG1     | 0.040209 | -2.610256 |  |
| 13395 | Histopathologic Grade differentiation | KIF5A     | 0.033626 | -2.600662 |  |
| 13396 | Histopathologic Grade differentiation | ABHD8     | 0.00063  | -2.579723 |  |
| 13397 | Histopathologic Grade differentiation | ZBTB40    | 0.027738 | -2.545984 |  |
| 13398 | Histopathologic Grade differentiation | JAKMIP3   | 0.028383 | -2.541878 |  |

|       |                                       |           |          |           |  |
|-------|---------------------------------------|-----------|----------|-----------|--|
| 13399 | Histopathologic Grade differentiation | THEM5     | 0.005622 | -2.539618 |  |
| 13400 | Histopathologic Grade differentiation | PREX1     | 0.025096 | -2.533661 |  |
| 13401 | Histopathologic Grade differentiation | FLNC      | 0.041262 | -2.531518 |  |
| 13402 | Histopathologic Grade differentiation | NXPH4     | 0.014629 | -2.527925 |  |
| 13403 | Histopathologic Grade differentiation | PER3      | 0.013987 | -2.520126 |  |
| 13404 | Histopathologic Grade differentiation | MDFI      | 0.007123 | -2.513263 |  |
| 13405 | Histopathologic Grade differentiation | LOC441426 | 0.018551 | -2.512    |  |
| 13406 | Histopathologic Grade differentiation | LTK       | 0.026317 | -2.506235 |  |
| 13407 | Histopathologic Grade differentiation | ASCL5     | 0.012154 | -2.496523 |  |
| 13408 | Histopathologic Grade differentiation | TBXAS1    | 0.01198  | -2.492425 |  |
| 13409 | Histopathologic Grade differentiation | NBEA      | 0.012294 | -2.491303 |  |
| 13410 | Histopathologic Grade differentiation | ENOX1     | 0.036851 | -2.487519 |  |
| 13411 | Histopathologic Grade differentiation | PTPRE     | 0.008496 | -2.486172 |  |
| 13412 | Histopathologic Grade differentiation | SIGLEC6   | 0.012802 | -2.477504 |  |
| 13413 | Histopathologic Grade differentiation | TRAM2     | 0.043427 | -2.461308 |  |
| 13414 | Histopathologic Grade differentiation | AP3B2     | 0.03778  | -2.457357 |  |
| 13415 | Histopathologic Grade differentiation | PANX2     | 0.013448 | -2.456609 |  |
| 13416 | Histopathologic Grade differentiation | TCEB2     | 0.031895 | -2.443718 |  |
| 13417 | Histopathologic Grade differentiation | ARID3A    | 0.004672 | -2.439908 |  |
| 13418 | Histopathologic Grade differentiation | AHI1      | 0.01448  | -2.437804 |  |
| 13419 | Histopathologic Grade differentiation | C17orf51  | 0.011872 | -2.422359 |  |
| 13420 | Histopathologic Grade differentiation | KLHDC8B   | 0.042535 | -2.405243 |  |
| 13421 | Histopathologic Grade differentiation | ANKRD10   | 0.000183 | -2.404043 |  |
| 13422 | Histopathologic Grade differentiation | ZNF273    | 0.008153 | -2.398726 |  |
| 13423 | Histopathologic Grade differentiation | SPSB4     | 0.012607 | -2.393359 |  |
| 13424 | Histopathologic Grade differentiation | SLC15A1   | 0.034731 | -2.385036 |  |
| 13425 | Histopathologic Grade differentiation | ZMAT3     | 0.00771  | -2.370959 |  |
| 13426 | Histopathologic Grade differentiation | FBXL14    | 0.000854 | -2.369245 |  |
| 13427 | Histopathologic Grade differentiation | VPS53     | 0.006008 | -2.36796  |  |
| 13428 | Histopathologic Grade differentiation | L1CAM     | 0.011974 | -2.367031 |  |
| 13429 | Histopathologic Grade differentiation | TRIM9     | 0.028175 | -2.363678 |  |
| 13430 | Histopathologic Grade differentiation | PHEX      | 0.036499 | -2.363163 |  |
| 13431 | Histopathologic Grade differentiation | GGT2      | 0.017975 | -2.359329 |  |
| 13432 | Histopathologic Grade differentiation | C17orf81  | 0.017824 | -2.358031 |  |
| 13433 | Histopathologic Grade differentiation | NMNAT3    | 0.033391 | -2.35604  |  |
| 13434 | Histopathologic Grade differentiation | MED10     | 0.03507  | -2.350887 |  |
| 13435 | Histopathologic Grade differentiation | NBPF3     | 0.028404 | -2.348766 |  |
| 13436 | Histopathologic Grade differentiation | FBXO17    | 0.012148 | -2.347638 |  |
| 13437 | Histopathologic Grade differentiation | CLN5      | 0.040928 | -2.343231 |  |
| 13438 | Histopathologic Grade differentiation | WHDC1L1   | 0.040457 | -2.342218 |  |
| 13439 | Histopathologic Grade differentiation | IQCG      | 0.032869 | -2.338604 |  |
| 13440 | Histopathologic Grade differentiation | NES       | 0.007869 | -2.337123 |  |
| 13441 | Histopathologic Grade differentiation | TMED6     | 0.040209 | -2.3353   |  |
| 13442 | Histopathologic Grade differentiation | KIF21B    | 0.00671  | -2.328681 |  |
| 13443 | Histopathologic Grade differentiation | SCAMP5    | 0.014843 | -2.32594  |  |
| 13444 | Histopathologic Grade differentiation | LOC283551 | 0.037922 | -2.32451  |  |
| 13445 | Histopathologic Grade differentiation | CADPS2    | 0.015922 | -2.304556 |  |
| 13446 | Histopathologic Grade differentiation | ADAMTS7   | 0.01112  | -2.298841 |  |
| 13447 | Histopathologic Grade differentiation | FAM123A   | 0.006211 | -2.297537 |  |
| 13448 | Histopathologic Grade differentiation | C2orf14   | 0.01198  | -2.295711 |  |



|       |                                       |              |          |           |  |
|-------|---------------------------------------|--------------|----------|-----------|--|
| 13449 | Histopathologic Grade differentiation | FOXA3        | 0.030954 | -2.295082 |  |
| 13450 | Histopathologic Grade differentiation | LCE1C        | 0.01305  | -2.290654 |  |
| 13451 | Histopathologic Grade differentiation | ARL4A        | 0.007123 | -2.284495 |  |
| 13452 | Histopathologic Grade differentiation | GBGT1        | 0.03811  | -2.282766 |  |
| 13453 | Histopathologic Grade differentiation | CDADC1       | 0.008574 | -2.282549 |  |
| 13454 | Histopathologic Grade differentiation | PIR          | 0.012294 | -2.270394 |  |
| 13455 | Histopathologic Grade differentiation | ZEB1         | 0.028617 | -2.265735 |  |
| 13456 | Histopathologic Grade differentiation | SEC31A       | 0.020211 | -2.259838 |  |
| 13457 | Histopathologic Grade differentiation | FBXO27       | 0.014193 | -2.259429 |  |
| 13458 | Histopathologic Grade differentiation | TMEFF1       | 0.001914 | -2.25391  |  |
| 13459 | Histopathologic Grade differentiation | HCP5         | 0.038419 | -2.250648 |  |
| 13460 | Histopathologic Grade differentiation | SOX18        | 0.009915 | -2.249341 |  |
| 13461 | Histopathologic Grade differentiation | PNPLA3       | 0.002707 | -2.245735 |  |
| 13462 | Histopathologic Grade differentiation | COL5A3       | 0.04019  | -2.240643 |  |
| 13463 | Histopathologic Grade differentiation | LOC100131582 | 0.01305  | -2.237252 |  |
| 13464 | Histopathologic Grade differentiation | CYB5B        | 0.013827 | -2.233574 |  |
| 13465 | Histopathologic Grade differentiation | TERF2        | 0.001861 | -2.224786 |  |
| 13466 | Histopathologic Grade differentiation | C22orf34     | 0.038    | -2.216259 |  |
| 13467 | Histopathologic Grade differentiation | NELL2        | 0.039047 | -2.215298 |  |
| 13468 | Histopathologic Grade differentiation | LOC284542    | 0.005942 | -2.213846 |  |
| 13469 | Histopathologic Grade differentiation | LOC100133005 | 0.035395 | -2.213144 |  |
| 13470 | Histopathologic Grade differentiation | ZNF350       | 0.004319 | -2.200095 |  |
| 13471 | Histopathologic Grade differentiation | DAB2         | 0.006747 | -2.193844 |  |
| 13472 | Histopathologic Grade differentiation | NUDT12       | 0.041563 | -2.188496 |  |
| 13473 | Histopathologic Grade differentiation | SEC14L4      | 0.032718 | -2.186528 |  |
| 13474 | Histopathologic Grade differentiation | LOC440338    | 0.001655 | -2.185677 |  |
| 13475 | Histopathologic Grade differentiation | SMA4         | 0.011127 | -2.185441 |  |
| 13476 | Histopathologic Grade differentiation | C10orf32     | 0.030082 | -2.182572 |  |
| 13477 | Histopathologic Grade differentiation | IRX3         | 0.010331 | -2.182127 |  |
| 13478 | Histopathologic Grade differentiation | ECHDC2       | 0.016115 | -2.17972  |  |
| 13479 | Histopathologic Grade differentiation | CARKD        | 0.04147  | -2.177246 |  |
| 13480 | Histopathologic Grade differentiation | C20orf94     | 0.019269 | -2.174943 |  |
| 13481 | Histopathologic Grade differentiation | RTN1         | 0.032046 | -2.17305  |  |
| 13482 | Histopathologic Grade differentiation | IFI27L2      | 0.031305 | -2.169142 |  |
| 13483 | Histopathologic Grade differentiation | RASA4        | 0.001394 | -2.168369 |  |
| 13484 | Histopathologic Grade differentiation | CES3         | 0.006602 | -2.167399 |  |
| 13485 | Histopathologic Grade differentiation | TXNL4B       | 0.010129 | -2.165419 |  |
| 13486 | Histopathologic Grade differentiation | HAPLN2       | 0.005842 | -2.164992 |  |
| 13487 | Histopathologic Grade differentiation | ESPNP        | 0.004186 | -2.162174 |  |
| 13488 | Histopathologic Grade differentiation | C1orf175     | 0.014483 | -2.149121 |  |
| 13489 | Histopathologic Grade differentiation | DLEU1        | 0.004474 | -2.145568 |  |
| 13490 | Histopathologic Grade differentiation | CCDC108      | 0.008701 | -2.14138  |  |
| 13491 | Histopathologic Grade differentiation | TSPYL2       | 0.008237 | -2.135386 |  |
| 13492 | Histopathologic Grade differentiation | SEPX1        | 0.003913 | -2.132559 |  |
| 13493 | Histopathologic Grade differentiation | CLCN5        | 0.042308 | -2.124566 |  |
| 13494 | Histopathologic Grade differentiation | GPNMB        | 0.028149 | -2.123332 |  |
| 13495 | Histopathologic Grade differentiation | ADSL         | 0.04163  | -2.117257 |  |
| 13496 | Histopathologic Grade differentiation | GEFT         | 0.0438   | -2.11232  |  |
| 13497 | Histopathologic Grade differentiation | ZBTB46       | 0.040057 | -2.104567 |  |
| 13498 | Histopathologic Grade differentiation | SSBP3        | 0.029421 | -2.102732 |  |

|       |                                       |           |          |           |  |
|-------|---------------------------------------|-----------|----------|-----------|--|
| 13499 | Histopathologic Grade differentiation | ITGB4     | 0.013998 | -2.095643 |  |
| 13500 | Histopathologic Grade differentiation | GPHA2     | 0.012999 | -2.091295 |  |
| 13501 | Histopathologic Grade differentiation | P2RX7     | 0.02703  | -2.079745 |  |
| 13502 | Histopathologic Grade differentiation | SLC22A1   | 0.003181 | -2.076038 |  |
| 13503 | Histopathologic Grade differentiation | TMEM63C   | 0.040878 | -2.070845 |  |
| 13504 | Histopathologic Grade differentiation | SEC22B    | 0.032277 | -2.067543 |  |
| 13505 | Histopathologic Grade differentiation | DIS3      | 0.039037 | -2.063113 |  |
| 13506 | Histopathologic Grade differentiation | RSRC1     | 0.032802 | -2.062702 |  |
| 13507 | Histopathologic Grade differentiation | IKZF1     | 0.033846 | -2.061818 |  |
| 13508 | Histopathologic Grade differentiation | CSNK2A1   | 0.025004 | -2.057276 |  |
| 13509 | Histopathologic Grade differentiation | BBS10     | 0.024636 | -2.05625  |  |
| 13510 | Histopathologic Grade differentiation | ALDH1A2   | 0.009433 | -2.055429 |  |
| 13511 | Histopathologic Grade differentiation | PDZD7     | 0.003188 | -2.053775 |  |
| 13512 | Histopathologic Grade differentiation | SRD5A1    | 0.022525 | -2.053575 |  |
| 13513 | Histopathologic Grade differentiation | B3GNTL1   | 0.016148 | -2.050805 |  |
| 13514 | Histopathologic Grade differentiation | ZNF569    | 0.027242 | -2.046698 |  |
| 13515 | Histopathologic Grade differentiation | VGLL4     | 0.004693 | -2.042269 |  |
| 13516 | Histopathologic Grade differentiation | PLCG2     | 0.03811  | -2.041336 |  |
| 13517 | Histopathologic Grade differentiation | ANKRD5    | 0.014515 | -2.040144 |  |
| 13518 | Histopathologic Grade differentiation | SDC3      | 0.004411 | -2.0394   |  |
| 13519 | Histopathologic Grade differentiation | CISD1     | 0.032589 | -2.036917 |  |
| 13520 | Histopathologic Grade differentiation | NUFIP1    | 0.003607 | -2.031173 |  |
| 13521 | Histopathologic Grade differentiation | FGFR3     | 0.003981 | -2.025636 |  |
| 13522 | Histopathologic Grade differentiation | RPS10     | 0.010176 | -2.024502 |  |
| 13523 | Histopathologic Grade differentiation | LYNX1     | 0.010176 | -2.02257  |  |
| 13524 | Histopathologic Grade differentiation | ZNF124    | 0.022161 | -2.020978 |  |
| 13525 | Histopathologic Grade differentiation | ARHGAP20  | 0.038422 | -2.020175 |  |
| 13526 | Histopathologic Grade differentiation | NOTCH1    | 0.011655 | -2.019435 |  |
| 13527 | Histopathologic Grade differentiation | RNASE1    | 0.028336 | -2.018029 |  |
| 13528 | Histopathologic Grade differentiation | MTRR      | 0.025096 | -2.013575 |  |
| 13529 | Histopathologic Grade differentiation | C5orf35   | 0.002683 | -2.013524 |  |
| 13530 | Histopathologic Grade differentiation | PIBF1     | 0.023169 | -2.011467 |  |
| 13531 | Histopathologic Grade differentiation | MMP17     | 0.043276 | -2.005543 |  |
| 13532 | Histopathologic Grade differentiation | ARID5B    | 0.033036 | 2.000468  |  |
| 13533 | Histopathologic Grade differentiation | TMEM91    | 0.008209 | 2.000854  |  |
| 13534 | Histopathologic Grade differentiation | EPHB4     | 0.005622 | 2.003675  |  |
| 13535 | Histopathologic Grade differentiation | KIAA1244  | 0.032417 | 2.003714  |  |
| 13536 | Histopathologic Grade differentiation | MYO1D     | 0.01395  | 2.004781  |  |
| 13537 | Histopathologic Grade differentiation | EXPH5     | 0.003329 | 2.005562  |  |
| 13538 | Histopathologic Grade differentiation | C15orf42  | 0.01198  | 2.018957  |  |
| 13539 | Histopathologic Grade differentiation | GIT2      | 0.012016 | 2.020047  |  |
| 13540 | Histopathologic Grade differentiation | RALGPS2   | 0.022825 | 2.024382  |  |
| 13541 | Histopathologic Grade differentiation | LOC728725 | 0.008196 | 2.029532  |  |
| 13542 | Histopathologic Grade differentiation | OAZ3      | 0.012099 | 2.039396  |  |
| 13543 | Histopathologic Grade differentiation | SCARB2    | 0.013417 | 2.042511  |  |
| 13544 | Histopathologic Grade differentiation | FLJ45949  | 0.001347 | 2.045498  |  |
| 13545 | Histopathologic Grade differentiation | HK1       | 0.033538 | 2.045737  |  |
| 13546 | Histopathologic Grade differentiation | GRLF1     | 0.000141 | 2.04598   |  |
| 13547 | Histopathologic Grade differentiation | SPINT1    | 0.005747 | 2.049275  |  |
| 13548 | Histopathologic Grade differentiation | C7orf44   | 0.008413 | 2.058893  |  |

|       |                                       |              |          |          |  |
|-------|---------------------------------------|--------------|----------|----------|--|
| 13549 | Histopathologic Grade differentiation | RNF19B       | 0.009427 | 2.063531 |  |
| 13550 | Histopathologic Grade differentiation | RTKN2        | 0.009665 | 2.064106 |  |
| 13551 | Histopathologic Grade differentiation | DYNC2H1      | 0.02958  | 2.067276 |  |
| 13552 | Histopathologic Grade differentiation | FOSL2        | 0.00773  | 2.076551 |  |
| 13553 | Histopathologic Grade differentiation | HSD17B7      | 0.035036 | 2.078039 |  |
| 13554 | Histopathologic Grade differentiation | ELL3         | 0.00404  | 2.078055 |  |
| 13555 | Histopathologic Grade differentiation | ARHGEF17     | 0.035765 | 2.079253 |  |
| 13556 | Histopathologic Grade differentiation | MAK          | 0.029029 | 2.082775 |  |
| 13557 | Histopathologic Grade differentiation | PKP4         | 0.011288 | 2.084385 |  |
| 13558 | Histopathologic Grade differentiation | MAP2K1       | 0.001186 | 2.085403 |  |
| 13559 | Histopathologic Grade differentiation | TNFRSF12A    | 0.003462 | 2.087319 |  |
| 13560 | Histopathologic Grade differentiation | C10orf118    | 0.003238 | 2.088661 |  |
| 13561 | Histopathologic Grade differentiation | LCA5         | 0.028149 | 2.089859 |  |
| 13562 | Histopathologic Grade differentiation | COL24A1      | 0.031116 | 2.094635 |  |
| 13563 | Histopathologic Grade differentiation | ATP11B       | 0.003332 | 2.09744  |  |
| 13564 | Histopathologic Grade differentiation | WDR52        | 0.031817 | 2.098932 |  |
| 13565 | Histopathologic Grade differentiation | FAM83H       | 0.004088 | 2.100673 |  |
| 13566 | Histopathologic Grade differentiation | PKN2         | 0.025518 | 2.102949 |  |
| 13567 | Histopathologic Grade differentiation | VEGFA        | 0.002406 | 2.107409 |  |
| 13568 | Histopathologic Grade differentiation | LAMA3        | 0.041546 | 2.111382 |  |
| 13569 | Histopathologic Grade differentiation | HIATL1       | 0.001758 | 2.113762 |  |
| 13570 | Histopathologic Grade differentiation | GDE1         | 0.005622 | 2.118712 |  |
| 13571 | Histopathologic Grade differentiation | ZFYVE19      | 0.012029 | 2.127718 |  |
| 13572 | Histopathologic Grade differentiation | CHD2         | 0.009488 | 2.128848 |  |
| 13573 | Histopathologic Grade differentiation | DCPS         | 0.000868 | 2.133712 |  |
| 13574 | Histopathologic Grade differentiation | VPS13C       | 0.036308 | 2.140244 |  |
| 13575 | Histopathologic Grade differentiation | RNF180       | 0.0031   | 2.147948 |  |
| 13576 | Histopathologic Grade differentiation | PDK4         | 0.030654 | 2.151014 |  |
| 13577 | Histopathologic Grade differentiation | TTC17        | 0.010562 | 2.163514 |  |
| 13578 | Histopathologic Grade differentiation | STK17B       | 0.014467 | 2.167417 |  |
| 13579 | Histopathologic Grade differentiation | P4HA2        | 0.003607 | 2.170528 |  |
| 13580 | Histopathologic Grade differentiation | TMEM191A     | 0.00745  | 2.175649 |  |
| 13581 | Histopathologic Grade differentiation | TMEM170B     | 0.041546 | 2.19354  |  |
| 13582 | Histopathologic Grade differentiation | LCOR         | 0.002878 | 2.202271 |  |
| 13583 | Histopathologic Grade differentiation | DENND3       | 0.043798 | 2.203066 |  |
| 13584 | Histopathologic Grade differentiation | MUC4         | 0.001871 | 2.205676 |  |
| 13585 | Histopathologic Grade differentiation | LOC100129069 | 0.000267 | 2.206937 |  |
| 13586 | Histopathologic Grade differentiation | IFI27L1      | 0.007368 | 2.207626 |  |
| 13587 | Histopathologic Grade differentiation | B4GALT1      | 0.003332 | 2.22832  |  |
| 13588 | Histopathologic Grade differentiation | hCG_1783494  | 0.008153 | 2.232546 |  |
| 13589 | Histopathologic Grade differentiation | NR2F2        | 0.008574 | 2.254344 |  |
| 13590 | Histopathologic Grade differentiation | LOC388564    | 0.00801  | 2.274356 |  |
| 13591 | Histopathologic Grade differentiation | SHROOM3      | 0.011626 | 2.276485 |  |
| 13592 | Histopathologic Grade differentiation | HSH2D        | 0.029716 | 2.280942 |  |
| 13593 | Histopathologic Grade differentiation | USP53        | 0.011462 | 2.294196 |  |
| 13594 | Histopathologic Grade differentiation | USP34        | 0.01778  | 2.314252 |  |
| 13595 | Histopathologic Grade differentiation | ROCK1        | 0.022315 | 2.32363  |  |
| 13596 | Histopathologic Grade differentiation | ZNF321       | 0.007156 | 2.32491  |  |
| 13597 | Histopathologic Grade differentiation | FAM160A1     | 0.01112  | 2.35069  |  |
| 13598 | Histopathologic Grade differentiation | TSPAN13      | 0.011713 | 2.354123 |  |

|       |                                       |              |          |          |  |
|-------|---------------------------------------|--------------|----------|----------|--|
| 13599 | Histopathologic Grade differentiation | C16orf75     | 0.009915 | 2.362487 |  |
| 13600 | Histopathologic Grade differentiation | APPL2        | 0.000066 | 2.376688 |  |
| 13601 | Histopathologic Grade differentiation | PDLIM1       | 0.008471 | 2.378194 |  |
| 13602 | Histopathologic Grade differentiation | C17orf67     | 0.036463 | 2.385931 |  |
| 13603 | Histopathologic Grade differentiation | LMO4         | 0.016045 | 2.412532 |  |
| 13604 | Histopathologic Grade differentiation | PIAS3        | 0.010123 | 2.426097 |  |
| 13605 | Histopathologic Grade differentiation | C6orf57      | 0.040796 | 2.439044 |  |
| 13606 | Histopathologic Grade differentiation | FLT3LG       | 0.000706 | 2.44382  |  |
| 13607 | Histopathologic Grade differentiation | PLAUR        | 0.014587 | 2.461881 |  |
| 13608 | Histopathologic Grade differentiation | AIM1         | 0.008659 | 2.473595 |  |
| 13609 | Histopathologic Grade differentiation | PNCK         | 0.000491 | 2.489765 |  |
| 13610 | Histopathologic Grade differentiation | DHRS9        | 0.001336 | 2.510497 |  |
| 13611 | Histopathologic Grade differentiation | ZBED5        | 0.035318 | 2.524241 |  |
| 13612 | Histopathologic Grade differentiation | CEP110       | 0.023699 | 2.537519 |  |
| 13613 | Histopathologic Grade differentiation | LIMS3        | 0.002489 | 2.558477 |  |
| 13614 | Histopathologic Grade differentiation | TTC6         | 0.015284 | 2.563837 |  |
| 13615 | Histopathologic Grade differentiation | LOC645381    | 0.007006 | 2.570939 |  |
| 13616 | Histopathologic Grade differentiation | SLCO5A1      | 0.00128  | 2.593504 |  |
| 13617 | Histopathologic Grade differentiation | ABL1         | 0.013206 | 2.61921  |  |
| 13618 | Histopathologic Grade differentiation | IRF6         | 0.002746 | 2.625752 |  |
| 13619 | Histopathologic Grade differentiation | KIAA0485     | 0.01411  | 2.635504 |  |
| 13620 | Histopathologic Grade differentiation | RARG         | 0.010199 | 2.635643 |  |
| 13621 | Histopathologic Grade differentiation | ADRB1        | 0.016634 | 2.638542 |  |
| 13622 | Histopathologic Grade differentiation | LOC100506748 | 0.006195 | 2.665503 |  |
| 13623 | Histopathologic Grade differentiation | FARP1        | 0.039876 | 2.679307 |  |
| 13624 | Histopathologic Grade differentiation | WLS          | 0.006195 | 2.703211 |  |
| 13625 | Histopathologic Grade differentiation | GRHL2        | 0.010176 | 2.720551 |  |
| 13626 | Histopathologic Grade differentiation | SH3RF2       | 0.008924 | 2.726288 |  |
| 13627 | Histopathologic Grade differentiation | MTHFD2L      | 0.001744 | 2.737343 |  |
| 13628 | Histopathologic Grade differentiation | LYSMD2       | 0.017063 | 2.757301 |  |
| 13629 | Histopathologic Grade differentiation | PRKD3        | 0.006949 | 2.761498 |  |
| 13630 | Histopathologic Grade differentiation | ITGB8        | 0.032802 | 2.767394 |  |
| 13631 | Histopathologic Grade differentiation | TIGD2        | 0.012807 | 2.787045 |  |
| 13632 | Histopathologic Grade differentiation | IL15RA       | 0.023241 | 2.807013 |  |
| 13633 | Histopathologic Grade differentiation | ATR          | 0.009124 | 2.834751 |  |
| 13634 | Histopathologic Grade differentiation | DUSP8        | 0.01992  | 2.881085 |  |
| 13635 | Histopathologic Grade differentiation | MPZL2        | 0.01198  | 2.910977 |  |
| 13636 | Histopathologic Grade differentiation | GPR160       | 0.002746 | 2.933982 |  |
| 13637 | Histopathologic Grade differentiation | SATB1        | 0.015439 | 2.951465 |  |
| 13638 | Histopathologic Grade differentiation | XDH          | 0.019852 | 2.9635   |  |
| 13639 | Histopathologic Grade differentiation | GAP43        | 0.043483 | 2.974488 |  |
| 13640 | Histopathologic Grade differentiation | SH3YL1       | 0.004381 | 2.99788  |  |
| 13641 | Histopathologic Grade differentiation | COBLL1       | 0.008605 | 3.005198 |  |
| 13642 | Histopathologic Grade differentiation | SGMS2        | 0.023583 | 3.031037 |  |
| 13643 | Histopathologic Grade differentiation | FBXO32       | 0.011127 | 3.031677 |  |
| 13644 | Histopathologic Grade differentiation | HIST2H2AA3   | 0.006195 | 3.086078 |  |
| 13645 | Histopathologic Grade differentiation | RASGRF2      | 0.015347 | 3.105836 |  |
| 13646 | Histopathologic Grade differentiation | C1orf21      | 0.020891 | 3.23382  |  |
| 13647 | Histopathologic Grade differentiation | TLE4         | 0.009549 | 3.286044 |  |
| 13648 | Histopathologic Grade differentiation | HOXA3        | 0.03074  | 3.319384 |  |

|       |                                       |           |          |           |  |
|-------|---------------------------------------|-----------|----------|-----------|--|
| 13649 | Histopathologic Grade differentiation | EHD2      | 0.040716 | 3.350242  |  |
| 13650 | Histopathologic Grade differentiation | TJP2      | 0.005622 | 3.414827  |  |
| 13651 | Histopathologic Grade differentiation | ZNF230    | 0.025457 | 3.436347  |  |
| 13652 | Histopathologic Grade differentiation | MGC45800  | 0.001509 | 3.584612  |  |
| 13653 | Histopathologic Grade differentiation | FAS       | 0.013987 | 3.656314  |  |
| 13654 | Histopathologic Grade differentiation | GNE       | 0.0243   | 3.767016  |  |
| 13655 | Histopathologic Grade differentiation | CHRM2     | 0.00745  | 3.773674  |  |
| 13656 | Histopathologic Grade differentiation | FOXP1     | 0.036097 | 3.825506  |  |
| 13657 | Histopathologic Grade differentiation | ESAM      | 0.034993 | 3.828741  |  |
| 13658 | Histopathologic Grade differentiation | TLR3      | 0.001097 | 3.836039  |  |
| 13659 | Histopathologic Grade differentiation | PLEKHG1   | 0.001094 | 3.850135  |  |
| 13660 | Histopathologic Grade differentiation | SAMD4A    | 0.011654 | 3.85908   |  |
| 13661 | Histopathologic Grade differentiation | KIAA1217  | 0.001509 | 3.912757  |  |
| 13662 | Histopathologic Grade differentiation | FAM13A    | 0.015224 | 4.162173  |  |
| 13663 | Histopathologic Grade differentiation | CABP1     | 0.033636 | 4.197124  |  |
| 13664 | Histopathologic Grade differentiation | RASEF     | 0.001097 | 4.208167  |  |
| 13665 | Histopathologic Grade differentiation | SAMD12    | 0.009379 | 4.472821  |  |
| 13666 | Histopathologic Grade differentiation | SYDE2     | 0.005995 | 4.54929   |  |
| 13667 | Histopathologic Grade differentiation | FAM107B   | 0.002878 | 4.641924  |  |
| 13668 | Histopathologic Grade differentiation | TNFRSF11A | 0.036371 | 4.785876  |  |
| 13669 | Histopathologic Grade differentiation | C1orf133  | 0.00745  | 4.963146  |  |
| 13670 | Histopathologic Grade differentiation | FAM129A   | 0.003384 | 4.982378  |  |
| 13671 | Histopathologic Grade differentiation | KIAA0020  | 0.000758 | 4.991233  |  |
| 13672 | Histopathologic Grade differentiation | FGD4      | 0.039475 | 5.021743  |  |
| 13673 | Histopathologic Grade differentiation | SGPP2     | 0.008002 | 5.209606  |  |
| 13674 | Histopathologic Grade differentiation | TESC      | 0.033046 | 5.308697  |  |
| 13675 | Histopathologic Grade differentiation | NTN4      | 0.001303 | 5.395852  |  |
| 13676 | Histopathologic Grade differentiation | ETV7      | 0.009436 | 5.484766  |  |
| 13677 | Histopathologic Grade differentiation | SERTAD4   | 0.005622 | 6.02577   |  |
| 13678 | Histopathologic Grade differentiation | FGFR2     | 0.014514 | 6.16505   |  |
| 13679 | Histopathologic Grade differentiation | ZNF776    | 0.02958  | 6.171461  |  |
| 13680 | Histopathologic Grade differentiation | MGC10981  | 0.025518 | 6.343178  |  |
| 13681 | Histopathologic Grade differentiation | STAP2     | 0.000223 | 7.021882  |  |
| 13682 | Histopathologic Grade differentiation | CD55      | 0.027523 | 7.103775  |  |
| 13683 | Histopathologic Grade differentiation | NPNT      | 0.003534 | 7.179623  |  |
| 13684 | Histopathologic Grade differentiation | TRPS1     | 0.012266 | 11.776154 |  |
| 13685 | Histopathologic Grade differentiation | ODZ3      | 0.032373 | 11.8673   |  |
| 13686 | Histopathologic Grade differentiation | AFAP1-AS  | 0.013448 | 15.305128 |  |
| 13687 | Histopathologic Grade differentiation | PAPSS2    | 0.00404  | 16.135591 |  |
| 13688 | HMGA1b Protein                        | HMGA1     | 0.000094 | -9.960206 |  |
| 13689 | HMGA1b Protein                        | EIF4EBP2  | 0.000549 | -2.475915 |  |
| 13690 | HMGA1b Protein                        | LZTS1     | 0.000003 | -2.240321 |  |
| 13691 | HMGA1b Protein                        | MAL2      | 0.000794 | -2.098098 |  |
| 13692 | HMGA1b Protein                        | CDK4      | 0.001899 | -2.075749 |  |
| 13693 | HMGA1b Protein                        | GLS2      | 0.0029   | -2.02811  |  |
| 13694 | HMGA1b Protein                        | C19orf42  | 0.000009 | -2.000794 |  |
| 13695 | HMGA1c Protein                        | HMGA1     | 0.000094 | -9.960206 |  |
| 13696 | HMGA1c Protein                        | EIF4EBP2  | 0.000549 | -2.475915 |  |
| 13697 | HMGA1c Protein                        | LZTS1     | 0.000003 | -2.240321 |  |
| 13698 | HMGA1c Protein                        | MAL2      | 0.000794 | -2.098098 |  |

|       |                |              |          |             |  |
|-------|----------------|--------------|----------|-------------|--|
| 13699 | HMGA1c Protein | CDK4         | 0.001899 | -2.075749   |  |
| 13700 | HMGA1c Protein | GLS2         | 0.0029   | -2.02811    |  |
| 13701 | HMGA1c Protein | C19orf42     | 0.000009 | -2.000794   |  |
| 13702 | Human cells    | C9orf125     | 0.000072 | -1298.37944 |  |
| 13703 | Human cells    | CNKSR3       | 0.000316 | -124.830849 |  |
| 13704 | Human cells    | FAM120B      | 0.000075 | -100.720277 |  |
| 13705 | Human cells    | MID1         | 0.000445 | -92.787503  |  |
| 13706 | Human cells    | ABAT         | 0.000333 | -63.352896  |  |
| 13707 | Human cells    | CADPS2       | 0.000355 | -58.269955  |  |
| 13708 | Human cells    | HIPK2        | 0.000291 | -53.636186  |  |
| 13709 | Human cells    | MLXIPL       | 0.000135 | -49.95375   |  |
| 13710 | Human cells    | ATP10D       | 0.000282 | -27.855315  |  |
| 13711 | Human cells    | EPHX2        | 0.000521 | -17.745048  |  |
| 13712 | Human cells    | BHLHE40      | 0.000286 | -16.543643  |  |
| 13713 | Human cells    | IL27RA       | 0.000402 | -13.902396  |  |
| 13714 | Human cells    | LOC100132273 | 0.000004 | -13.370863  |  |
| 13715 | Human cells    | CCDC146      | 0.000022 | -11.056943  |  |
| 13716 | Human cells    | FAM83F       | 0.000419 | -10.407689  |  |
| 13717 | Human cells    | SAT2         | 0.000099 | -10.402509  |  |
| 13718 | Human cells    | DTNB         | 0.000445 | -10.209464  |  |
| 13719 | Human cells    | CYP1B1       | 0        | -9.781122   |  |
| 13720 | Human cells    | FUT8         | 0.000282 | -9.051947   |  |
| 13721 | Human cells    | BIK          | 0.000004 | -8.498466   |  |
| 13722 | Human cells    | HACE1        | 0.000417 | -8.496176   |  |
| 13723 | Human cells    | ABCA5        | 0.00005  | -8.236745   |  |
| 13724 | Human cells    | KIAA1211     | 0.000154 | -8.170336   |  |
| 13725 | Human cells    | LYN          | 0.000005 | -8.015746   |  |
| 13726 | Human cells    | DNHD1        | 0.00009  | -7.832598   |  |
| 13727 | Human cells    | IQCG         | 0.000154 | -7.705877   |  |
| 13728 | Human cells    | LOC100130357 | 0.000038 | -7.663775   |  |
| 13729 | Human cells    | PLS3         | 0.00009  | -7.214046   |  |
| 13730 | Human cells    | CPSF2        | 0.000061 | -6.975072   |  |
| 13731 | Human cells    | TCEAL2       | 0.000006 | -6.859401   |  |
| 13732 | Human cells    | UGT1A1       | 0        | -6.315951   |  |
| 13733 | Human cells    | ZFP14        | 0.000424 | -6.185132   |  |
| 13734 | Human cells    | ITPR1        | 0.00003  | -6.173306   |  |
| 13735 | Human cells    | RABL4        | 0.000209 | -5.953176   |  |
| 13736 | Human cells    | FMNL2        | 0.000204 | -5.762469   |  |
| 13737 | Human cells    | JAG1         | 0.000087 | -5.705999   |  |
| 13738 | Human cells    | NT5M         | 0.000521 | -5.666996   |  |
| 13739 | Human cells    | FAM69A       | 0.000268 | -5.60504    |  |
| 13740 | Human cells    | CDADC1       | 0.000193 | -5.542345   |  |
| 13741 | Human cells    | ANKRD42      | 0.000082 | -5.496973   |  |
| 13742 | Human cells    | HDDC2        | 0.000414 | -5.463333   |  |
| 13743 | Human cells    | CYP4V2       | 0.000035 | -5.342829   |  |
| 13744 | Human cells    | IGLL3        | 0.000497 | -5.135458   |  |
| 13745 | Human cells    | RTDR1        | 0.000423 | -5.050415   |  |
| 13746 | Human cells    | HSPA4L       | 0        | -5.000249   |  |
| 13747 | Human cells    | ACOX3        | 0.000135 | -5.000085   |  |
| 13748 | Human cells    | STX6         | 0.000154 | -4.962607   |  |

|       |             |              |          |           |  |
|-------|-------------|--------------|----------|-----------|--|
| 13749 | Human cells | MSI2         | 0.000015 | -4.960336 |  |
| 13750 | Human cells | GBE1         | 0.000373 | -4.92179  |  |
| 13751 | Human cells | NIN          | 0.000024 | -4.790656 |  |
| 13752 | Human cells | BBS9         | 0.000093 | -4.738447 |  |
| 13753 | Human cells | PRODH        | 0.000213 | -4.705215 |  |
| 13754 | Human cells | ZBTB47       | 0.000521 | -4.669141 |  |
| 13755 | Human cells | SLC2A4       | 0.000278 | -4.512144 |  |
| 13756 | Human cells | OR4N4        | 0.000204 | -4.395892 |  |
| 13757 | Human cells | CGGBP1       | 0.000061 | -4.315759 |  |
| 13758 | Human cells | LOC728448    | 0.000234 | -4.251742 |  |
| 13759 | Human cells | TBXAS1       | 0.000237 | -4.081353 |  |
| 13760 | Human cells | MAPRE2       | 0.000193 | -4.080819 |  |
| 13761 | Human cells | SAT1         | 0.000035 | -4.017131 |  |
| 13762 | Human cells | SH3BGR       | 0.000209 | -3.931459 |  |
| 13763 | Human cells | USP13        | 0.000208 | -3.858849 |  |
| 13764 | Human cells | MTERFD2      | 0.000193 | -3.831917 |  |
| 13765 | Human cells | LOC100134119 | 0.000393 | -3.788561 |  |
| 13766 | Human cells | PRPS2        | 0.000025 | -3.77657  |  |
| 13767 | Human cells | LOC442270    | 0.000058 | -3.748188 |  |
| 13768 | Human cells | ACOT9        | 0.000039 | -3.725177 |  |
| 13769 | Human cells | RSL1D1       | 0.000011 | -3.713423 |  |
| 13770 | Human cells | SMA4         | 0.000392 | -3.705228 |  |
| 13771 | Human cells | LOC157562    | 0.000135 | -3.527667 |  |
| 13772 | Human cells | MYC          | 0.0005   | -3.515492 |  |
| 13773 | Human cells | C1orf226     | 0.000353 | -3.482497 |  |
| 13774 | Human cells | EXDL2        | 0.000144 | -3.428238 |  |
| 13775 | Human cells | LOH12CR1     | 0.0001   | -3.425623 |  |
| 13776 | Human cells | COBL         | 0.000144 | -3.413096 |  |
| 13777 | Human cells | AHI1         | 0.000064 | -3.345557 |  |
| 13778 | Human cells | LOC147645    | 0.000007 | -3.257132 |  |
| 13779 | Human cells | ZCCHC7       | 0.000295 | -3.231801 |  |
| 13780 | Human cells | ACSL3        | 0        | -3.20428  |  |
| 13781 | Human cells | ZNF557       | 0.000119 | -3.195714 |  |
| 13782 | Human cells | RBKS         | 0.000067 | -3.187384 |  |
| 13783 | Human cells | FBXW2        | 0.000316 | -3.154812 |  |
| 13784 | Human cells | KLHL15       | 0.000521 | -3.15467  |  |
| 13785 | Human cells | LOC440396    | 0.000355 | -3.064023 |  |
| 13786 | Human cells | SH2B2        | 0.000475 | -3.059526 |  |
| 13787 | Human cells | PCSK5        | 0.000459 | -3.056948 |  |
| 13788 | Human cells | NFYB         | 0        | -3.033535 |  |
| 13789 | Human cells | SPATA7       | 0.000389 | -3.028222 |  |
| 13790 | Human cells | UFSP2        | 0.000509 | -3.020012 |  |
| 13791 | Human cells | RNU12        | 0.000261 | -3.00526  |  |
| 13792 | Human cells | PIGH         | 0.000162 | -2.993498 |  |
| 13793 | Human cells | ITM2C        | 0.000255 | -2.993242 |  |
| 13794 | Human cells | ETFDH        | 0.000246 | -2.961829 |  |
| 13795 | Human cells | APOO         | 0.000091 | -2.909463 |  |
| 13796 | Human cells | C17orf45     | 0.000282 | -2.883876 |  |
| 13797 | Human cells | POLR3F       | 0        | -2.861953 |  |
| 13798 | Human cells | MRPL18       | 0        | -2.842184 |  |

|       |             |           |          |           |  |
|-------|-------------|-----------|----------|-----------|--|
| 13799 | Human cells | MID1IP1   | 0.00003  | -2.824787 |  |
| 13800 | Human cells | RMND1     | 0.000507 | -2.81366  |  |
| 13801 | Human cells | ZNF18     | 0.000381 | -2.794412 |  |
| 13802 | Human cells | RPGR      | 0.000351 | -2.783919 |  |
| 13803 | Human cells | RNF130    | 0.000087 | -2.773257 |  |
| 13804 | Human cells | C14orf100 | 0.000237 | -2.7582   |  |
| 13805 | Human cells | CDC42EP1  | 0.000162 | -2.728591 |  |
| 13806 | Human cells | MRPL34    | 0.000218 | -2.717989 |  |
| 13807 | Human cells | SMCR7L    | 0.0001   | -2.68474  |  |
| 13808 | Human cells | MAGOH     | 0        | -2.677711 |  |
| 13809 | Human cells | DIRC1     | 0.000377 | -2.673842 |  |
| 13810 | Human cells | FARP2     | 0.000187 | -2.66268  |  |
| 13811 | Human cells | PAIP2B    | 0.000487 | -2.655846 |  |
| 13812 | Human cells | TMTC4     | 0.000482 | -2.654245 |  |
| 13813 | Human cells | HIST1H4B  | 0.000509 | -2.626881 |  |
| 13814 | Human cells | PRDX4     | 0.000167 | -2.617971 |  |
| 13815 | Human cells | CD97      | 0.000521 | -2.587175 |  |
| 13816 | Human cells | ZNF409    | 0.000143 | -2.582499 |  |
| 13817 | Human cells | TDP1      | 0.000402 | -2.556651 |  |
| 13818 | Human cells | LIN52     | 0.000061 | -2.555914 |  |
| 13819 | Human cells | LOC344967 | 0.000492 | -2.544458 |  |
| 13820 | Human cells | AP4S1     | 0        | -2.535025 |  |
| 13821 | Human cells | HSD17B11  | 0.0001   | -2.534032 |  |
| 13822 | Human cells | ACOT7     | 0.000402 | -2.498078 |  |
| 13823 | Human cells | C12orf57  | 0.000424 | -2.492894 |  |
| 13824 | Human cells | C6orf35   | 0.000428 | -2.480078 |  |
| 13825 | Human cells | SMARCE1   | 0        | -2.470837 |  |
| 13826 | Human cells | BBS10     | 0        | -2.458878 |  |
| 13827 | Human cells | ASTN2     | 0.000389 | -2.440821 |  |
| 13828 | Human cells | HIST1H3G  | 0        | -2.43851  |  |
| 13829 | Human cells | EIF3L     | 0.000268 | -2.438209 |  |
| 13830 | Human cells | MEGF9     | 0.000161 | -2.437944 |  |
| 13831 | Human cells | LOC643220 | 0.000286 | -2.425949 |  |
| 13832 | Human cells | PDSS2     | 0.00044  | -2.412645 |  |
| 13833 | Human cells | HIGD1A    | 0.000082 | -2.411246 |  |
| 13834 | Human cells | NGDN      | 0.000014 | -2.40989  |  |
| 13835 | Human cells | VDAC1     | 0.00036  | -2.403048 |  |
| 13836 | Human cells | STXBP1    | 0.000521 | -2.400944 |  |
| 13837 | Human cells | MR1       | 0.000082 | -2.400894 |  |
| 13838 | Human cells | TLE3      | 0.000159 | -2.393145 |  |
| 13839 | Human cells | EIF4B     | 0.00033  | -2.387684 |  |
| 13840 | Human cells | CNGB1     | 0        | -2.383365 |  |
| 13841 | Human cells | TNRC6B    | 0.000456 | -2.383205 |  |
| 13842 | Human cells | COPZ1     | 0.000413 | -2.373177 |  |
| 13843 | Human cells | FH        | 0        | -2.353813 |  |
| 13844 | Human cells | C14orf126 | 0.000242 | -2.350964 |  |
| 13845 | Human cells | DENND1A   | 0.000355 | -2.342864 |  |
| 13846 | Human cells | ATG4A     | 0.000394 | -2.333514 |  |
| 13847 | Human cells | MAFB      | 0.00033  | -2.314435 |  |
| 13848 | Human cells | ZNF318    | 0.000124 | -2.312317 |  |



|       |             |              |          |           |  |
|-------|-------------|--------------|----------|-----------|--|
| 13849 | Human cells | ACO2         | 0.000234 | -2.277367 |  |
| 13850 | Human cells | LOC100190939 | 0.000113 | -2.258036 |  |
| 13851 | Human cells | CDS2         | 0.000258 | -2.256708 |  |
| 13852 | Human cells | LOC120364    | 0.000424 | -2.256464 |  |
| 13853 | Human cells | IMPDH2       | 0.000492 | -2.256004 |  |
| 13854 | Human cells | GRPEL1       | 0.000521 | -2.240109 |  |
| 13855 | Human cells | CMC1         | 0.000309 | -2.22477  |  |
| 13856 | Human cells | ARID1B       | 0.000099 | -2.221163 |  |
| 13857 | Human cells | ZFYVE1       | 0.000278 | -2.219254 |  |
| 13858 | Human cells | ACAD10       | 0.000112 | -2.180166 |  |
| 13859 | Human cells | C9orf91      | 0.000268 | -2.17898  |  |
| 13860 | Human cells | E2F2         | 0.000521 | -2.175628 |  |
| 13861 | Human cells | TTLL3        | 0.000297 | -2.156659 |  |
| 13862 | Human cells | PDXP         | 0.000006 | -2.13219  |  |
| 13863 | Human cells | FAM125A      | 0.000355 | -2.102634 |  |
| 13864 | Human cells | UQCRC1       | 0.000011 | -2.101209 |  |
| 13865 | Human cells | C1QBP        | 0.000283 | -2.075906 |  |
| 13866 | Human cells | TIMM44       | 0.000024 | -2.066057 |  |
| 13867 | Human cells | CDK7         | 0        | -2.053379 |  |
| 13868 | Human cells | JMJD6        | 0.000521 | -2.044773 |  |
| 13869 | Human cells | RNMTL1       | 0.000277 | -2.043078 |  |
| 13870 | Human cells | LOC148709    | 0.000354 | -2.03822  |  |
| 13871 | Human cells | CNTROB       | 0.000316 | -2.030106 |  |
| 13872 | Human cells | SF3B5        | 0.000414 | -2.006777 |  |
| 13873 | Human cells | HIST1H1T     | 0        | 2.001387  |  |
| 13874 | Human cells | LASP1        | 0.000001 | 2.002258  |  |
| 13875 | Human cells | MOXD1        | 0        | 2.002775  |  |
| 13876 | Human cells | EHBP1L1      | 0.000208 | 2.003314  |  |
| 13877 | Human cells | PKLR         | 0        | 2.004163  |  |
| 13878 | Human cells | GRINA        | 0.000204 | 2.011493  |  |
| 13879 | Human cells | TIAM1        | 0        | 2.012516  |  |
| 13880 | Human cells | FCAR         | 0        | 2.020903  |  |
| 13881 | Human cells | FXYD1        | 0        | 2.02511   |  |
| 13882 | Human cells | IGLV1-40     | 0        | 2.026514  |  |
| 13883 | Human cells | CPE          | 0        | 2.026514  |  |
| 13884 | Human cells | RBM26        | 0        | 2.027919  |  |
| 13885 | Human cells | CD8A         | 0        | 2.029325  |  |
| 13886 | Human cells | FCER1G       | 0        | 2.03214   |  |
| 13887 | Human cells | RASL11B      | 0        | 2.033549  |  |
| 13888 | Human cells | GLP1R        | 0        | 2.039195  |  |
| 13889 | Human cells | LOC730286    | 0.000146 | 2.042263  |  |
| 13890 | Human cells | MICALL1      | 0.000242 | 2.04526   |  |
| 13891 | Human cells | LOC728769    | 0.000371 | 2.047471  |  |
| 13892 | Human cells | IL1B         | 0        | 2.049114  |  |
| 13893 | Human cells | CD53         | 0        | 2.066229  |  |
| 13894 | Human cells | PLA2G2D      | 0        | 2.066229  |  |
| 13895 | Human cells | IGHG1        | 0        | 2.07053   |  |
| 13896 | Human cells | ITGB1BP3     | 0        | 2.073402  |  |
| 13897 | Human cells | CD5L         | 0        | 2.086377  |  |
| 13898 | Human cells | MFSD10       | 0        | 2.087086  |  |

|       |             |           |          |          |  |
|-------|-------------|-----------|----------|----------|--|
| 13899 | Human cells | SIGLEC7   | 0        | 2.089272 |  |
| 13900 | Human cells | AIM2      | 0        | 2.089272 |  |
| 13901 | Human cells | NDN       | 0        | 2.095072 |  |
| 13902 | Human cells | FBN1      | 0        | 2.096525 |  |
| 13903 | Human cells | STC1      | 0        | 2.100889 |  |
| 13904 | Human cells | NOS1      | 0        | 2.106722 |  |
| 13905 | Human cells | CXorf40B  | 0.000486 | 2.111282 |  |
| 13906 | Human cells | PAK3      | 0        | 2.112571 |  |
| 13907 | Human cells | GJB4      | 0        | 2.122846 |  |
| 13908 | Human cells | RNH1      | 0.000316 | 2.124698 |  |
| 13909 | Human cells | NAPRT1    | 0.000167 | 2.127462 |  |
| 13910 | Human cells | TAZ       | 0.000143 | 2.133776 |  |
| 13911 | Human cells | ADPRH     | 0        | 2.140577 |  |
| 13912 | Human cells | ZNF460    | 0        | 2.150989 |  |
| 13913 | Human cells | GPR161    | 0        | 2.16295  |  |
| 13914 | Human cells | LOC731275 | 0.000002 | 2.163543 |  |
| 13915 | Human cells | CYP2B7P1  | 0        | 2.16595  |  |
| 13916 | Human cells | LMOD1     | 0        | 2.174977 |  |
| 13917 | Human cells | LOC401357 | 0        | 2.17545  |  |
| 13918 | Human cells | DENND1C   | 0        | 2.181015 |  |
| 13919 | Human cells | C8A       | 0        | 2.188587 |  |
| 13920 | Human cells | RGSL1     | 0        | 2.191624 |  |
| 13921 | Human cells | MMP13     | 0        | 2.191624 |  |
| 13922 | Human cells | CARD14    | 0        | 2.194664 |  |
| 13923 | Human cells | CTSW      | 0        | 2.208398 |  |
| 13924 | Human cells | ECRP      | 0        | 2.216065 |  |
| 13925 | Human cells | RASSF4    | 0        | 2.229932 |  |
| 13926 | Human cells | CYP4A11   | 0        | 2.236124 |  |
| 13927 | Human cells | LRP4      | 0        | 2.237674 |  |
| 13928 | Human cells | ETS1      | 0        | 2.240778 |  |
| 13929 | Human cells | PDGFA     | 0        | 2.254801 |  |
| 13930 | Human cells | FAM3A     | 0.000237 | 2.271018 |  |
| 13931 | Human cells | NRG1      | 0        | 2.272059 |  |
| 13932 | Human cells | CCDC19    | 0.000041 | 2.280748 |  |
| 13933 | Human cells | ITGA10    | 0        | 2.283109 |  |
| 13934 | Human cells | JAK3      | 0        | 2.286277 |  |
| 13935 | Human cells | OR2S2     | 0        | 2.287862 |  |
| 13936 | Human cells | CMKLR1    | 0        | 2.306971 |  |
| 13937 | Human cells | RASSF7    | 0.000148 | 2.313444 |  |
| 13938 | Human cells | CACNA1A   | 0        | 2.316586 |  |
| 13939 | Human cells | SCGN      | 0        | 2.327853 |  |
| 13940 | Human cells | DAO       | 0        | 2.335935 |  |
| 13941 | Human cells | PRLR      | 0        | 2.340797 |  |
| 13942 | Human cells | ERGIC3    | 0        | 2.34242  |  |
| 13943 | Human cells | KIAA1881  | 0.000237 | 2.349848 |  |
| 13944 | Human cells | PAX6      | 0        | 2.355446 |  |
| 13945 | Human cells | ORAI2     | 0.000355 | 2.368232 |  |
| 13946 | Human cells | TCF4      | 0        | 2.370186 |  |
| 13947 | Human cells | CX3CL1    | 0        | 2.388326 |  |
| 13948 | Human cells | SORBS1    | 0        | 2.39164  |  |

|       |             |              |          |          |  |
|-------|-------------|--------------|----------|----------|--|
| 13949 | Human cells | TEAD3        | 0.000061 | 2.404121 |  |
| 13950 | Human cells | HCLS1        | 0        | 2.431759 |  |
| 13951 | Human cells | TMEM184A     | 0.000061 | 2.443268 |  |
| 13952 | Human cells | SP140        | 0.000246 | 2.444219 |  |
| 13953 | Human cells | ACRV1        | 0        | 2.450371 |  |
| 13954 | Human cells | SULF1        | 0        | 2.45207  |  |
| 13955 | Human cells | MLLT6        | 0.000005 | 2.453535 |  |
| 13956 | Human cells | SPIN2A       | 0        | 2.45377  |  |
| 13957 | Human cells | GON4L        | 0        | 2.45377  |  |
| 13958 | Human cells | WDR1         | 0        | 2.463996 |  |
| 13959 | Human cells | SLC25A4      | 0        | 2.500125 |  |
| 13960 | Human cells | IRAK1        | 0.000428 | 2.500215 |  |
| 13961 | Human cells | ACTG2        | 0        | 2.512285 |  |
| 13962 | Human cells | PSG9         | 0        | 2.517514 |  |
| 13963 | Human cells | GPRC5C       | 0.000292 | 2.527811 |  |
| 13964 | Human cells | LOC100507666 | 0        | 2.538542 |  |
| 13965 | Human cells | SFXN5        | 0.000297 | 2.594348 |  |
| 13966 | Human cells | tcag7.907    | 0        | 2.602368 |  |
| 13967 | Human cells | HEATR7A      | 0.000492 | 2.614327 |  |
| 13968 | Human cells | GPR124       | 0        | 2.63536  |  |
| 13969 | Human cells | GLIPR1       | 0.000011 | 2.636184 |  |
| 13970 | Human cells | MEF2C        | 0        | 2.648178 |  |
| 13971 | Human cells | SLC10A1      | 0        | 2.685145 |  |
| 13972 | Human cells | PRB4         | 0        | 2.730187 |  |
| 13973 | Human cells | AKT1S1       | 0.000204 | 2.736527 |  |
| 13974 | Human cells | ERG          | 0        | 2.739666 |  |
| 13975 | Human cells | MDM2         | 0        | 2.745369 |  |
| 13976 | Human cells | C21orf71     | 0.000014 | 2.746564 |  |
| 13977 | Human cells | CTSD         | 0.000072 | 2.758571 |  |
| 13978 | Human cells | MOBKL2C      | 0.000413 | 2.821208 |  |
| 13979 | Human cells | MLL          | 0        | 2.840215 |  |
| 13980 | Human cells | SLC9A3R2     | 0.000054 | 2.842996 |  |
| 13981 | Human cells | RBM5         | 0        | 2.871889 |  |
| 13982 | Human cells | IQCE         | 0.000359 | 2.901126 |  |
| 13983 | Human cells | LPP          | 0        | 2.911979 |  |
| 13984 | Human cells | C4orf34      | 0        | 2.954676 |  |
| 13985 | Human cells | PDGFRL       | 0        | 2.96288  |  |
| 13986 | Human cells | DCN          | 0        | 3.025136 |  |
| 13987 | Human cells | TNFRSF21     | 0.000066 | 3.029186 |  |
| 13988 | Human cells | PHLDA3       | 0.000037 | 3.070606 |  |
| 13989 | Human cells | TINAGL1      | 0.000151 | 3.103956 |  |
| 13990 | Human cells | NACAP1       | 0        | 3.123146 |  |
| 13991 | Human cells | CXCR3        | 0        | 3.133989 |  |
| 13992 | Human cells | ITGA3        | 0.000291 | 3.174543 |  |
| 13993 | Human cells | HBG1         | 0        | 3.177738 |  |
| 13994 | Human cells | CTAG1A       | 0        | 3.18877  |  |
| 13995 | Human cells | PDGFRA       | 0        | 3.190981 |  |
| 13996 | Human cells | MYL4         | 0        | 3.21095  |  |
| 13997 | Human cells | C22orf29     | 0.000124 | 3.214952 |  |
| 13998 | Human cells | PGK2         | 0        | 3.224331 |  |

|       |             |           |          |          |  |
|-------|-------------|-----------|----------|----------|--|
| 13999 | Human cells | UNC93B1   | 0.000002 | 3.228436 |  |
| 14000 | Human cells | CSNK1G1   | 0        | 3.228804 |  |
| 14001 | Human cells | KLHL35    | 0.000033 | 3.235531 |  |
| 14002 | Human cells | SPPL2B    | 0        | 3.244509 |  |
| 14003 | Human cells | SRCAP     | 0.000216 | 3.28083  |  |
| 14004 | Human cells | CDH11     | 0        | 3.282966 |  |
| 14005 | Human cells | RXRA      | 0.000037 | 3.293291 |  |
| 14006 | Human cells | CTNNB1    | 0        | 3.310387 |  |
| 14007 | Human cells | PRKD2     | 0.000124 | 3.334099 |  |
| 14008 | Human cells | FLRT2     | 0        | 3.335724 |  |
| 14009 | Human cells | TRIM56    | 0.000414 | 3.341161 |  |
| 14010 | Human cells | PLEKHA4   | 0.000011 | 3.432111 |  |
| 14011 | Human cells | KLHDC10   | 0        | 3.434262 |  |
| 14012 | Human cells | C14orf115 | 0        | 3.437692 |  |
| 14013 | Human cells | PTPRH     | 0.000291 | 3.466    |  |
| 14014 | Human cells | TMEM106A  | 0.000004 | 3.534425 |  |
| 14015 | Human cells | SSH3      | 0        | 3.644911 |  |
| 14016 | Human cells | PCSK6     | 0.000497 | 3.670522 |  |
| 14017 | Human cells | RGNEF     | 0.000156 | 3.713951 |  |
| 14018 | Human cells | ATP10B    | 0        | 3.810552 |  |
| 14019 | Human cells | CA9       | 0.000291 | 3.905632 |  |
| 14020 | Human cells | TNNI2     | 0.000011 | 3.944015 |  |
| 14021 | Human cells | BASP1     | 0        | 3.994459 |  |
| 14022 | Human cells | ZCCHC24   | 0        | 4.008326 |  |
| 14023 | Human cells | NLRC5     | 0.000204 | 4.032659 |  |
| 14024 | Human cells | LPHN1     | 0        | 4.041806 |  |
| 14025 | Human cells | SERPINE1  | 0.000061 | 4.1164   |  |
| 14026 | Human cells | DMBX1     | 0.000226 | 4.161581 |  |
| 14027 | Human cells | DNM1      | 0.000359 | 4.312468 |  |
| 14028 | Human cells | KIAA1659  | 0        | 4.371111 |  |
| 14029 | Human cells | PVRL1     | 0.000522 | 4.458198 |  |
| 14030 | Human cells | ATP6V1B1  | 0.000074 | 4.572513 |  |
| 14031 | Human cells | PTGS2     | 0.000139 | 4.634416 |  |
| 14032 | Human cells | SERPINF1  | 0        | 4.730524 |  |
| 14033 | Human cells | TYMP      | 0.000003 | 4.981838 |  |
| 14034 | Human cells | ABLIM3    | 0.000198 | 5.087636 |  |
| 14035 | Human cells | PPFIBP1   | 0        | 5.115942 |  |
| 14036 | Human cells | RHBDF1    | 0.000237 | 5.261642 |  |
| 14037 | Human cells | FAP       | 0        | 5.300028 |  |
| 14038 | Human cells | ITM2A     | 0        | 5.381469 |  |
| 14039 | Human cells | TRPS1     | 0.000394 | 5.397774 |  |
| 14040 | Human cells | HNF1B     | 0.000037 | 5.861257 |  |
| 14041 | Human cells | GATA2     | 0.000049 | 5.893886 |  |
| 14042 | Human cells | MUPCDH    | 0.000494 | 5.977978 |  |
| 14043 | Human cells | WNT10A    | 0.000038 | 6.06077  |  |
| 14044 | Human cells | LRG1      | 0.000309 | 6.245968 |  |
| 14045 | Human cells | HLA-DRB1  | 0        | 6.263634 |  |
| 14046 | Human cells | AGRN      | 0.000001 | 6.749664 |  |
| 14047 | Human cells | ETV7      | 0.000059 | 7.214569 |  |
| 14048 | Human cells | LGALS9    | 0.000378 | 7.278245 |  |

|       |                             |           |          |           |  |
|-------|-----------------------------|-----------|----------|-----------|--|
| 14049 | Human cells                 | C6orf145  | 0.000087 | 7.289675  |  |
| 14050 | Human cells                 | MMRN2     | 0.000099 | 7.512883  |  |
| 14051 | Human cells                 | TBL1X     | 0        | 7.594737  |  |
| 14052 | Human cells                 | LGALS9C   | 0.000155 | 8.105818  |  |
| 14053 | Human cells                 | DHRS9     | 0.000282 | 8.203724  |  |
| 14054 | Human cells                 | UPK3A     | 0.000419 | 8.411729  |  |
| 14055 | Human cells                 | TRIM29    | 0        | 9.058532  |  |
| 14056 | Human cells                 | RAB7B     | 0.000304 | 9.350441  |  |
| 14057 | Human cells                 | OLFML2B   | 0        | 10.253183 |  |
| 14058 | Human cells                 | FAM3D     | 0.00003  | 10.343878 |  |
| 14059 | Human cells                 | IFI27     | 0.000005 | 11.248729 |  |
| 14060 | Human cells                 | IFI6      | 0        | 20.704685 |  |
| 14061 | Incised wound               | COL1A1    | 0        | -5.27529  |  |
| 14062 | Incised wound               | MMP7      | 0        | -4.132738 |  |
| 14063 | Incised wound               | SPP1      | 0        | -4.130239 |  |
| 14064 | Incised wound               | IL8       | 0        | -3.187774 |  |
| 14065 | Incised wound               | KRT23     | 0        | -3.15084  |  |
| 14066 | Incised wound               | COL1A2    | 0        | -3.116379 |  |
| 14067 | Incised wound               | TGFB1     | 0        | -2.936139 |  |
| 14068 | Incised wound               | INHBA     | 0        | -2.666466 |  |
| 14069 | Incised wound               | HKDC1     | 0        | -2.660582 |  |
| 14070 | Incised wound               | NFE2L3    | 0        | -2.463859 |  |
| 14071 | Incised wound               | CCL20     | 0        | -2.310437 |  |
| 14072 | Incised wound               | SFRP4     | 0        | -2.294594 |  |
| 14073 | Incised wound               | MMP12     | 0        | -2.283803 |  |
| 14074 | Incised wound               | COL10A1   | 0        | -2.176511 |  |
| 14075 | Incised wound               | MYC       | 0        | -2.131113 |  |
| 14076 | Incised wound               | JUB       | 0        | -2.121437 |  |
| 14077 | Incised wound               | GZMB      | 0        | -2.088884 |  |
| 14078 | Incised wound               | CDC123    | 0        | 2.016474  |  |
| 14079 | Incised wound               | C6orf118  | 0        | 2.143404  |  |
| 14080 | Incised wound               | CD1A      | 0        | 2.195462  |  |
| 14081 | Incised wound               | NUDCD1    | 0        | 2.265265  |  |
| 14082 | Incised wound               | ENPEP     | 0        | 2.363024  |  |
| 14083 | Independently able          | MSMB      | 0.002956 | -4.62731  |  |
| 14084 | Independently able          | KIAA1244  | 0.000016 | -3.114559 |  |
| 14085 | Independently able          | IPO9      | 0.000579 | -3.043129 |  |
| 14086 | Independently able          | PLA1A     | 0.003508 | -3.038372 |  |
| 14087 | Independently able          | PRH2      | 0.008593 | -3.022254 |  |
| 14088 | Independently able          | UBE3A     | 0.000686 | -2.271173 |  |
| 14089 | Independently able          | SIM2      | 0.000128 | -2.247735 |  |
| 14090 | Independently able          | PLA2G7    | 0.006039 | -2.243142 |  |
| 14091 | Independently able          | C8orf4    | 0.001152 | -2.225611 |  |
| 14092 | Independently able          | CAB39L    | 0.003537 | -2.162929 |  |
| 14093 | Independently able          | IGFBPL1   | 0.000006 | 2.577189  |  |
| 14094 | Independently able          | CCNE2     | 0.000512 | 2.788011  |  |
| 14095 | Infiltrating duct carcinoma | ENOSF1    | 0.04975  | -2.163659 |  |
| 14096 | Infiltrating duct carcinoma | LOC728448 | 0.004106 | 2.432727  |  |
| 14097 | Infiltrating duct carcinoma | TCERG1    | 0.047633 | 2.472226  |  |
| 14098 | Infiltration                | ENOSF1    | 0.04975  | -2.163659 |  |

|       |                             |              |          |           |  |
|-------|-----------------------------|--------------|----------|-----------|--|
| 14099 | Infiltration                | LOC728448    | 0.004106 | 2.432727  |  |
| 14100 | Infiltration                | TCERG1       | 0.047633 | 2.472226  |  |
| 14101 | Inflammatory Bowel Diseases | CDHR1        | 0.000406 | -4.901889 |  |
| 14102 | Inflammatory Bowel Diseases | AXIN2        | 0.000046 | -4.587413 |  |
| 14103 | Inflammatory Bowel Diseases | ZNRF3        | 0.000007 | -3.318925 |  |
| 14104 | Inflammatory Bowel Diseases | ZNF321       | 0.000074 | -3.298804 |  |
| 14105 | Inflammatory Bowel Diseases | ZNF777       | 0.000089 | -3.27148  |  |
| 14106 | Inflammatory Bowel Diseases | RNF43        | 0.000046 | -3.214493 |  |
| 14107 | Inflammatory Bowel Diseases | B4GALT6      | 0.000355 | -3.16038  |  |
| 14108 | Inflammatory Bowel Diseases | LOC100505730 | 0.000125 | -3.101631 |  |
| 14109 | Inflammatory Bowel Diseases | FOXA2        | 0.000059 | -2.956134 |  |
| 14110 | Inflammatory Bowel Diseases | DDX31        | 0.000436 | -2.917829 |  |
| 14111 | Inflammatory Bowel Diseases | NPIPL3       | 0.000109 | -2.876296 |  |
| 14112 | Inflammatory Bowel Diseases | RHEB         | 0.00009  | -2.82394  |  |
| 14113 | Inflammatory Bowel Diseases | C19orf2      | 0.00002  | -2.78316  |  |
| 14114 | Inflammatory Bowel Diseases | EFNA3        | 0.000334 | -2.774743 |  |
| 14115 | Inflammatory Bowel Diseases | AMACR        | 0.000009 | -2.733981 |  |
| 14116 | Inflammatory Bowel Diseases | CCDC113      | 0.000034 | -2.696156 |  |
| 14117 | Inflammatory Bowel Diseases | ARHGAP8      | 0.000084 | -2.637195 |  |
| 14118 | Inflammatory Bowel Diseases | CYP2S1       | 0.000037 | -2.636245 |  |
| 14119 | Inflammatory Bowel Diseases | TOP1MT       | 0.000007 | -2.597406 |  |
| 14120 | Inflammatory Bowel Diseases | CFTR         | 0.000155 | -2.533039 |  |
| 14121 | Inflammatory Bowel Diseases | TMEM201      | 0.000349 | -2.453447 |  |
| 14122 | Inflammatory Bowel Diseases | ZNF703       | 0.000227 | -2.404688 |  |
| 14123 | Inflammatory Bowel Diseases | NMNAT3       | 0.000004 | -2.403053 |  |
| 14124 | Inflammatory Bowel Diseases | ABHD11       | 0.000124 | -2.312944 |  |
| 14125 | Inflammatory Bowel Diseases | PPM1H        | 0.000417 | -2.307378 |  |
| 14126 | Inflammatory Bowel Diseases | L2HGDH       | 0.000098 | -2.267435 |  |
| 14127 | Inflammatory Bowel Diseases | MACROD1      | 0.000251 | -2.25448  |  |
| 14128 | Inflammatory Bowel Diseases | IYD          | 0.000401 | -2.237171 |  |
| 14129 | Inflammatory Bowel Diseases | EXPH5        | 0.00009  | -2.225301 |  |
| 14130 | Inflammatory Bowel Diseases | AADAT        | 0.000126 | -2.18463  |  |
| 14131 | Inflammatory Bowel Diseases | POF1B        | 0.000296 | -2.176879 |  |
| 14132 | Inflammatory Bowel Diseases | C8orf33      | 0.00002  | -2.154067 |  |
| 14133 | Inflammatory Bowel Diseases | NETO2        | 0.000371 | -2.153651 |  |
| 14134 | Inflammatory Bowel Diseases | PHF14        | 0.000107 | -2.152611 |  |
| 14135 | Inflammatory Bowel Diseases | GGH          | 0.000049 | -2.142053 |  |
| 14136 | Inflammatory Bowel Diseases | ALDH1B1      | 0.000296 | -2.07956  |  |
| 14137 | Inflammatory Bowel Diseases | MEST         | 0.000006 | -2.067237 |  |
| 14138 | Inflammatory Bowel Diseases | WNK4         | 0.000292 | -2.063297 |  |
| 14139 | Inflammatory Bowel Diseases | CIRH1A       | 0.00011  | -2.061629 |  |
| 14140 | Inflammatory Bowel Diseases | PRMT3        | 0.000227 | -2.055489 |  |
| 14141 | Inflammatory Bowel Diseases | RAB40B       | 0.00004  | -2.046246 |  |
| 14142 | Inflammatory Bowel Diseases | PUS7         | 0.000124 | -2.045736 |  |
| 14143 | Inflammatory Bowel Diseases | ZKSCAN1      | 0.000046 | -2.042176 |  |
| 14144 | Inflammatory Bowel Diseases | TBRG4        | 0.000124 | -2.040378 |  |
| 14145 | Inflammatory Bowel Diseases | CXADR        | 0.000271 | -2.036179 |  |
| 14146 | Inflammatory Bowel Diseases | ZNF704       | 0.000172 | -2.025003 |  |
| 14147 | Inflammatory Bowel Diseases | SERF1A       | 0.000025 | -2.011575 |  |
| 14148 | Inflammatory Bowel Diseases | APOL6        | 0.000126 | 2.03811   |  |

|       |                             |              |          |           |  |
|-------|-----------------------------|--------------|----------|-----------|--|
| 14149 | Inflammatory Bowel Diseases | HLA-DRA      | 0.000068 | 2.047747  |  |
| 14150 | Inflammatory Bowel Diseases | CRELD2       | 0.000328 | 2.054979  |  |
| 14151 | Inflammatory Bowel Diseases | XCR1         | 0.000226 | 2.073231  |  |
| 14152 | Inflammatory Bowel Diseases | PARP9        | 0.000398 | 2.084306  |  |
| 14153 | Inflammatory Bowel Diseases | NLRC5        | 0.00029  | 2.092173  |  |
| 14154 | Inflammatory Bowel Diseases | HLA-DRB1     | 0.000069 | 2.093284  |  |
| 14155 | Inflammatory Bowel Diseases | STAT1        | 0.000143 | 2.144517  |  |
| 14156 | Inflammatory Bowel Diseases | CYSLTR1      | 0.000331 | 2.152448  |  |
| 14157 | Inflammatory Bowel Diseases | IGLV2-23     | 0.000046 | 2.167195  |  |
| 14158 | Inflammatory Bowel Diseases | GBP2         | 0.00039  | 2.184644  |  |
| 14159 | Inflammatory Bowel Diseases | RASA4        | 0.000187 | 2.240732  |  |
| 14160 | Inflammatory Bowel Diseases | LOC728392    | 0.000239 | 2.27988   |  |
| 14161 | Inflammatory Bowel Diseases | UBE2L6       | 0.00012  | 2.29084   |  |
| 14162 | Inflammatory Bowel Diseases | IGKV4-1      | 0.000009 | 2.298194  |  |
| 14163 | Inflammatory Bowel Diseases | HLA-DPA1     | 0.00009  | 2.303741  |  |
| 14164 | Inflammatory Bowel Diseases | LST1         | 0.000179 | 2.307241  |  |
| 14165 | Inflammatory Bowel Diseases | CTSC         | 0.000008 | 2.318629  |  |
| 14166 | Inflammatory Bowel Diseases | CARD16       | 0.000164 | 2.397914  |  |
| 14167 | Inflammatory Bowel Diseases | CCR2         | 0.000251 | 2.474624  |  |
| 14168 | Inflammatory Bowel Diseases | BTN3A3       | 0.000042 | 2.50311   |  |
| 14169 | Inflammatory Bowel Diseases | IGLL5        | 0.000342 | 2.579993  |  |
| 14170 | Inflammatory Bowel Diseases | CD40         | 0.000376 | 2.586738  |  |
| 14171 | Inflammatory Bowel Diseases | PSMB9        | 0.000013 | 2.620499  |  |
| 14172 | Inflammatory Bowel Diseases | CIITA        | 0.000374 | 2.620771  |  |
| 14173 | Inflammatory Bowel Diseases | SFMBT2       | 0.00009  | 2.625821  |  |
| 14174 | Inflammatory Bowel Diseases | HLA-DMA      | 0.000045 | 2.735534  |  |
| 14175 | Inflammatory Bowel Diseases | KCND3        | 0.000126 | 3.374661  |  |
| 14176 | Inflammatory Bowel Diseases | SAMD9L       | 0.000353 | 3.700721  |  |
| 14177 | Inflammatory disorder       | CDHR1        | 0.000406 | -4.901889 |  |
| 14178 | Inflammatory disorder       | AXIN2        | 0.000046 | -4.587413 |  |
| 14179 | Inflammatory disorder       | ZNRF3        | 0.000007 | -3.318925 |  |
| 14180 | Inflammatory disorder       | ZNF321       | 0.000074 | -3.298804 |  |
| 14181 | Inflammatory disorder       | ZNF777       | 0.000089 | -3.27148  |  |
| 14182 | Inflammatory disorder       | RNF43        | 0.000046 | -3.214493 |  |
| 14183 | Inflammatory disorder       | B4GALT6      | 0.000355 | -3.16038  |  |
| 14184 | Inflammatory disorder       | LOC100505730 | 0.000125 | -3.101631 |  |
| 14185 | Inflammatory disorder       | FOXA2        | 0.000059 | -2.956134 |  |
| 14186 | Inflammatory disorder       | DDX31        | 0.000436 | -2.917829 |  |
| 14187 | Inflammatory disorder       | NPIPL3       | 0.000109 | -2.876296 |  |
| 14188 | Inflammatory disorder       | RHEB         | 0.00009  | -2.82394  |  |
| 14189 | Inflammatory disorder       | C19orf2      | 0.00002  | -2.78316  |  |
| 14190 | Inflammatory disorder       | EFNA3        | 0.000334 | -2.774743 |  |
| 14191 | Inflammatory disorder       | AMACR        | 0.000009 | -2.733981 |  |
| 14192 | Inflammatory disorder       | CCDC113      | 0.000034 | -2.696156 |  |
| 14193 | Inflammatory disorder       | ARHGAP8      | 0.000084 | -2.637195 |  |
| 14194 | Inflammatory disorder       | CYP2S1       | 0.000037 | -2.636245 |  |
| 14195 | Inflammatory disorder       | TOP1MT       | 0.000007 | -2.597406 |  |
| 14196 | Inflammatory disorder       | CFTR         | 0.000155 | -2.533039 |  |
| 14197 | Inflammatory disorder       | TMEM201      | 0.000349 | -2.453447 |  |
| 14198 | Inflammatory disorder       | ZNF703       | 0.000227 | -2.404688 |  |

|       |                       |           |          |           |  |
|-------|-----------------------|-----------|----------|-----------|--|
| 14199 | Inflammatory disorder | NMNAT3    | 0.000004 | -2.403053 |  |
| 14200 | Inflammatory disorder | ABHD11    | 0.000124 | -2.312944 |  |
| 14201 | Inflammatory disorder | PPM1H     | 0.000417 | -2.307378 |  |
| 14202 | Inflammatory disorder | L2HGDH    | 0.000098 | -2.267435 |  |
| 14203 | Inflammatory disorder | MACROD1   | 0.000251 | -2.25448  |  |
| 14204 | Inflammatory disorder | IYD       | 0.000401 | -2.237171 |  |
| 14205 | Inflammatory disorder | EXPH5     | 0.00009  | -2.225301 |  |
| 14206 | Inflammatory disorder | AADAT     | 0.000126 | -2.18463  |  |
| 14207 | Inflammatory disorder | POF1B     | 0.000296 | -2.176879 |  |
| 14208 | Inflammatory disorder | C8orf33   | 0.00002  | -2.154067 |  |
| 14209 | Inflammatory disorder | NETO2     | 0.000371 | -2.153651 |  |
| 14210 | Inflammatory disorder | PHF14     | 0.000107 | -2.152611 |  |
| 14211 | Inflammatory disorder | GGH       | 0.000049 | -2.142053 |  |
| 14212 | Inflammatory disorder | ALDH1B1   | 0.000296 | -2.07956  |  |
| 14213 | Inflammatory disorder | MEST      | 0.000006 | -2.067237 |  |
| 14214 | Inflammatory disorder | WNK4      | 0.000292 | -2.063297 |  |
| 14215 | Inflammatory disorder | CIRH1A    | 0.00011  | -2.061629 |  |
| 14216 | Inflammatory disorder | PRMT3     | 0.000227 | -2.055489 |  |
| 14217 | Inflammatory disorder | RAB40B    | 0.00004  | -2.046246 |  |
| 14218 | Inflammatory disorder | PUS7      | 0.000124 | -2.045736 |  |
| 14219 | Inflammatory disorder | ZKSCAN1   | 0.000046 | -2.042176 |  |
| 14220 | Inflammatory disorder | TBRG4     | 0.000124 | -2.040378 |  |
| 14221 | Inflammatory disorder | CXADR     | 0.000271 | -2.036179 |  |
| 14222 | Inflammatory disorder | ZNF704    | 0.000172 | -2.025003 |  |
| 14223 | Inflammatory disorder | SERF1A    | 0.000025 | -2.011575 |  |
| 14224 | Inflammatory disorder | APOL6     | 0.000126 | 2.03811   |  |
| 14225 | Inflammatory disorder | HLA-DRA   | 0.000068 | 2.047747  |  |
| 14226 | Inflammatory disorder | CRELD2    | 0.000328 | 2.054979  |  |
| 14227 | Inflammatory disorder | XCR1      | 0.000226 | 2.073231  |  |
| 14228 | Inflammatory disorder | PARP9     | 0.000398 | 2.084306  |  |
| 14229 | Inflammatory disorder | NLRC5     | 0.00029  | 2.092173  |  |
| 14230 | Inflammatory disorder | HLA-DRB1  | 0.000069 | 2.093284  |  |
| 14231 | Inflammatory disorder | STAT1     | 0.000143 | 2.144517  |  |
| 14232 | Inflammatory disorder | CYSLTR1   | 0.000331 | 2.152448  |  |
| 14233 | Inflammatory disorder | IGLV2-23  | 0.000046 | 2.167195  |  |
| 14234 | Inflammatory disorder | GBP2      | 0.00039  | 2.184644  |  |
| 14235 | Inflammatory disorder | RASA4     | 0.000187 | 2.240732  |  |
| 14236 | Inflammatory disorder | LOC728392 | 0.000239 | 2.27988   |  |
| 14237 | Inflammatory disorder | UBE2L6    | 0.00012  | 2.29084   |  |
| 14238 | Inflammatory disorder | IGKV4-1   | 0.000009 | 2.298194  |  |
| 14239 | Inflammatory disorder | HLA-DPA1  | 0.00009  | 2.303741  |  |
| 14240 | Inflammatory disorder | LST1      | 0.000179 | 2.307241  |  |
| 14241 | Inflammatory disorder | CTSC      | 0.000008 | 2.318629  |  |
| 14242 | Inflammatory disorder | CARD16    | 0.000164 | 2.397914  |  |
| 14243 | Inflammatory disorder | CCR2      | 0.000251 | 2.474624  |  |
| 14244 | Inflammatory disorder | BTN3A3    | 0.000042 | 2.50311   |  |
| 14245 | Inflammatory disorder | IGLL5     | 0.000342 | 2.579993  |  |
| 14246 | Inflammatory disorder | CD40      | 0.000376 | 2.586738  |  |
| 14247 | Inflammatory disorder | PSMB9     | 0.000013 | 2.620499  |  |
| 14248 | Inflammatory disorder | CIITA     | 0.000374 | 2.620771  |  |



|       |                       |              |          |            |  |
|-------|-----------------------|--------------|----------|------------|--|
| 14249 | Inflammatory disorder | SFMBT2       | 0.00009  | 2.625821   |  |
| 14250 | Inflammatory disorder | HLA-DMA      | 0.000045 | 2.735534   |  |
| 14251 | Inflammatory disorder | KCND3        | 0.000126 | 3.374661   |  |
| 14252 | Inflammatory disorder | SAMD9L       | 0.000353 | 3.700721   |  |
| 14253 | Instability           | SLC26A3      | 0.000001 | -39.432581 |  |
| 14254 | Instability           | GUCA2A       | 0        | -16.294008 |  |
| 14255 | Instability           | KRT23        | 0.031055 | -13.498961 |  |
| 14256 | Instability           | CHRM3        | 0.038848 | -5.36188   |  |
| 14257 | Instability           | AMACR        | 0.013025 | -3.921634  |  |
| 14258 | Instability           | DST          | 0        | -3.84509   |  |
| 14259 | Instability           | SEMA5A       | 0.031272 | -3.759141  |  |
| 14260 | Instability           | MUC20        | 0.015636 | -3.733484  |  |
| 14261 | Instability           | TOB1         | 0.034358 | -3.662296  |  |
| 14262 | Instability           | AMT          | 0.038194 | -3.50289   |  |
| 14263 | Instability           | MGLL         | 0        | -3.330854  |  |
| 14264 | Instability           | SHROOM4      | 0.012577 | -3.132474  |  |
| 14265 | Instability           | PLAGL2       | 0.049045 | -3.10742   |  |
| 14266 | Instability           | SPIRE2       | 0.04666  | -2.907811  |  |
| 14267 | Instability           | NUDT7        | 0.038848 | -2.789623  |  |
| 14268 | Instability           | AXIN2        | 0.034678 | -2.724455  |  |
| 14269 | Instability           | DHRS12       | 0.044875 | -2.469173  |  |
| 14270 | Instability           | KCNE3        | 0.040552 | -2.459474  |  |
| 14271 | Instability           | LOC100292959 | 0.037228 | -2.424323  |  |
| 14272 | Instability           | MBTD1        | 0.007661 | -2.387456  |  |
| 14273 | Instability           | C10orf47     | 0.04666  | -2.365174  |  |
| 14274 | Instability           | SYNJ2        | 0.004314 | -2.171962  |  |
| 14275 | Instability           | LPAR1        | 0        | -2.101231  |  |
| 14276 | Instability           | RAP2A        | 0.004876 | -2.069568  |  |
| 14277 | Instability           | CAMKK2       | 0.004876 | -2.058886  |  |
| 14278 | Instability           | TXNDC9       | 0.034502 | -2.032892  |  |
| 14279 | Instability           | CBX3         | 0.000002 | 2.001406   |  |
| 14280 | Instability           | LONP1        | 0        | 2.008715   |  |
| 14281 | Instability           | MTA2         | 0.000001 | 2.010076   |  |
| 14282 | Instability           | KIF15        | 0        | 2.015372   |  |
| 14283 | Instability           | GOLT1B       | 0        | 2.015554   |  |
| 14284 | Instability           | RIPK2        | 0        | 2.016821   |  |
| 14285 | Instability           | MTERFD1      | 0.000001 | 2.018794   |  |
| 14286 | Instability           | KIF11        | 0.000001 | 2.025286   |  |
| 14287 | Instability           | NUP107       | 0        | 2.028406   |  |
| 14288 | Instability           | CCDC59       | 0        | 2.030633   |  |
| 14289 | Instability           | MFAP2        | 0        | 2.032549   |  |
| 14290 | Instability           | SET          | 0        | 2.042096   |  |
| 14291 | Instability           | TIMELESS     | 0        | 2.051896   |  |
| 14292 | Instability           | OIP5         | 0.000001 | 2.065998   |  |
| 14293 | Instability           | CALD1        | 0        | 2.066687   |  |
| 14294 | Instability           | RUVBL1       | 0        | 2.069813   |  |
| 14295 | Instability           | NUP205       | 0.000001 | 2.074642   |  |
| 14296 | Instability           | STT3A        | 0        | 2.077468   |  |
| 14297 | Instability           | ENO1         | 0.000002 | 2.078688   |  |
| 14298 | Instability           | RUVBL2       | 0        | 2.080554   |  |

|       |             |          |          |          |  |
|-------|-------------|----------|----------|----------|--|
| 14299 | Instability | IGHG1    | 0        | 2.086508 |  |
| 14300 | Instability | SMCHD1   | 0.016022 | 2.088014 |  |
| 14301 | Instability | NUCB2    | 0.038592 | 2.090244 |  |
| 14302 | Instability | TPM2     | 0        | 2.094737 |  |
| 14303 | Instability | RFC5     | 0.000001 | 2.096438 |  |
| 14304 | Instability | EPPK1    | 0.000001 | 2.101393 |  |
| 14305 | Instability | SLC25A32 | 0.000001 | 2.113102 |  |
| 14306 | Instability | GINS2    | 0.000001 | 2.11675  |  |
| 14307 | Instability | NUP85    | 0.000001 | 2.11777  |  |
| 14308 | Instability | RBM28    | 0        | 2.120363 |  |
| 14309 | Instability | NCAPG2   | 0        | 2.125408 |  |
| 14310 | Instability | CAD      | 0.000001 | 2.127343 |  |
| 14311 | Instability | GTF2IRD1 | 0        | 2.133547 |  |
| 14312 | Instability | FANCL    | 0        | 2.139324 |  |
| 14313 | Instability | GZMB     | 0        | 2.14732  |  |
| 14314 | Instability | KCNRG    | 0.031716 | 2.151451 |  |
| 14315 | Instability | KIF2C    | 0.000001 | 2.154208 |  |
| 14316 | Instability | OAS3     | 0.000001 | 2.155018 |  |
| 14317 | Instability | MMP11    | 0        | 2.155168 |  |
| 14318 | Instability | FANCG    | 0        | 2.166676 |  |
| 14319 | Instability | TMEM158  | 0        | 2.168515 |  |
| 14320 | Instability | CCL4     | 0        | 2.174968 |  |
| 14321 | Instability | RAB15    | 0        | 2.188293 |  |
| 14322 | Instability | CTSK     | 0        | 2.189639 |  |
| 14323 | Instability | JAG2     | 0.000001 | 2.191192 |  |
| 14324 | Instability | RPL22L1  | 0.04666  | 2.194733 |  |
| 14325 | Instability | WDR43    | 0.000001 | 2.194866 |  |
| 14326 | Instability | SPOCK1   | 0        | 2.207104 |  |
| 14327 | Instability | WNT5A    | 0        | 2.230763 |  |
| 14328 | Instability | TAGLN    | 0        | 2.230853 |  |
| 14329 | Instability | POLR1D   | 0.000001 | 2.252838 |  |
| 14330 | Instability | COL15A1  | 0        | 2.260351 |  |
| 14331 | Instability | NUP37    | 0.000001 | 2.262069 |  |
| 14332 | Instability | FUT8     | 0        | 2.267452 |  |
| 14333 | Instability | PITX1    | 0.000001 | 2.26755  |  |
| 14334 | Instability | SFRP4    | 0        | 2.276769 |  |
| 14335 | Instability | KIF20A   | 0        | 2.295043 |  |
| 14336 | Instability | MICB     | 0        | 2.307009 |  |
| 14337 | Instability | SULF1    | 0        | 2.319154 |  |
| 14338 | Instability | HS2ST1   | 0.000002 | 2.328743 |  |
| 14339 | Instability | MYL9     | 0.000001 | 2.334374 |  |
| 14340 | Instability | CBFB     | 0        | 2.334836 |  |
| 14341 | Instability | CDC42EP1 | 0.000001 | 2.339437 |  |
| 14342 | Instability | SORD     | 0.000001 | 2.341712 |  |
| 14343 | Instability | MRPS17   | 0.000001 | 2.391333 |  |
| 14344 | Instability | NOP56    | 0.000001 | 2.40229  |  |
| 14345 | Instability | ZWILCH   | 0        | 2.403617 |  |
| 14346 | Instability | ARNTL2   | 0        | 2.425129 |  |
| 14347 | Instability | PSAT1    | 0.000001 | 2.45864  |  |
| 14348 | Instability | NFE2L3   | 0        | 2.463088 |  |

|       |             |          |          |          |  |
|-------|-------------|----------|----------|----------|--|
| 14349 | Instability | CSE1L    | 0.000001 | 2.467005 |  |
| 14350 | Instability | C12orf11 | 0        | 2.477935 |  |
| 14351 | Instability | COL6A1   | 0        | 2.48556  |  |
| 14352 | Instability | VAR5     | 0        | 2.490948 |  |
| 14353 | Instability | ICAM1    | 0        | 2.498583 |  |
| 14354 | Instability | MCM7     | 0        | 2.562626 |  |
| 14355 | Instability | UBE2L6   | 0.000001 | 2.570384 |  |
| 14356 | Instability | PSMG1    | 0.000001 | 2.572526 |  |
| 14357 | Instability | CDC6     | 0        | 2.585624 |  |
| 14358 | Instability | AHCY     | 0.000002 | 2.587594 |  |
| 14359 | Instability | CCNA2    | 0.000001 | 2.6516   |  |
| 14360 | Instability | BOP1     | 0        | 2.693284 |  |
| 14361 | Instability | GBP1     | 0        | 2.698104 |  |
| 14362 | Instability | CDC25B   | 0.000001 | 2.70041  |  |
| 14363 | Instability | C7orf68  | 0.000001 | 2.713761 |  |
| 14364 | Instability | RFC3     | 0        | 2.720527 |  |
| 14365 | Instability | EIF5A    | 0        | 2.754041 |  |
| 14366 | Instability | FEN1     | 0.000001 | 2.754245 |  |
| 14367 | Instability | MMP3     | 0        | 2.756449 |  |
| 14368 | Instability | COL11A1  | 0        | 2.790647 |  |
| 14369 | Instability | TNC      | 0        | 2.807085 |  |
| 14370 | Instability | MMP1     | 0.000001 | 2.832884 |  |
| 14371 | Instability | TEAD4    | 0.000001 | 2.833619 |  |
| 14372 | Instability | LGR5     | 0.000001 | 2.855969 |  |
| 14373 | Instability | LMNB2    | 0        | 2.858719 |  |
| 14374 | Instability | NT5DC2   | 0        | 2.876001 |  |
| 14375 | Instability | HNRNPL   | 0        | 2.905758 |  |
| 14376 | Instability | SLC7A5   | 0.000001 | 2.932664 |  |
| 14377 | Instability | SHMT2    | 0        | 2.982462 |  |
| 14378 | Instability | GAS1     | 0        | 3.007882 |  |
| 14379 | Instability | KIF4A    | 0.000001 | 3.052197 |  |
| 14380 | Instability | GIN5     | 0        | 3.07162  |  |
| 14381 | Instability | F12      | 0        | 3.082553 |  |
| 14382 | Instability | STAT1    | 0        | 3.107809 |  |
| 14383 | Instability | TRIP13   | 0        | 3.129853 |  |
| 14384 | Instability | ASPHD2   | 0.021281 | 3.136229 |  |
| 14385 | Instability | NUTF2    | 0        | 3.241433 |  |
| 14386 | Instability | CEP55    | 0        | 3.248565 |  |
| 14387 | Instability | SOD2     | 0        | 3.254564 |  |
| 14388 | Instability | FOXMI    | 0        | 3.25519  |  |
| 14389 | Instability | MFAP5    | 0        | 3.321188 |  |
| 14390 | Instability | MCM4     | 0        | 3.415645 |  |
| 14391 | Instability | TACSTD2  | 0        | 3.446898 |  |
| 14392 | Instability | MIF      | 0.000001 | 3.504093 |  |
| 14393 | Instability | GREM1    | 0        | 3.545274 |  |
| 14394 | Instability | PBK      | 0.000001 | 3.714962 |  |
| 14395 | Instability | ECT2     | 0        | 3.796085 |  |
| 14396 | Instability | TMEM97   | 0        | 3.826889 |  |
| 14397 | Instability | PMAIP1   | 0        | 4.0525   |  |
| 14398 | Instability | CXCL9    | 0        | 4.116745 |  |

|       |                     |              |          |           |  |
|-------|---------------------|--------------|----------|-----------|--|
| 14399 | Instability         | IFITM1       | 0        | 4.28338   |  |
| 14400 | Instability         | CXCL10       | 0        | 4.8737    |  |
| 14401 | Instability         | ACTG2        | 0        | 4.912122  |  |
| 14402 | Instability         | CXCL1        | 0        | 5.226033  |  |
| 14403 | Instability         | SRSF6        | 0.000001 | 6.156758  |  |
| 14404 | Instability         | MMP12        | 0        | 6.617377  |  |
| 14405 | Instability         | CXCL3        | 0        | 7.233392  |  |
| 14406 | Instability         | SPP1         | 0        | 7.465531  |  |
| 14407 | Intestinal Diseases | CDHR1        | 0.000406 | -4.901889 |  |
| 14408 | Intestinal Diseases | AXIN2        | 0.000046 | -4.587413 |  |
| 14409 | Intestinal Diseases | ZNRF3        | 0.000007 | -3.318925 |  |
| 14410 | Intestinal Diseases | ZNF321       | 0.000074 | -3.298804 |  |
| 14411 | Intestinal Diseases | ZNF777       | 0.000089 | -3.27148  |  |
| 14412 | Intestinal Diseases | RNF43        | 0.000046 | -3.214493 |  |
| 14413 | Intestinal Diseases | B4GALT6      | 0.000355 | -3.16038  |  |
| 14414 | Intestinal Diseases | LOC100505730 | 0.000125 | -3.101631 |  |
| 14415 | Intestinal Diseases | FOXA2        | 0.000059 | -2.956134 |  |
| 14416 | Intestinal Diseases | DDX31        | 0.000436 | -2.917829 |  |
| 14417 | Intestinal Diseases | NPIPL3       | 0.000109 | -2.876296 |  |
| 14418 | Intestinal Diseases | RHEB         | 0.00009  | -2.82394  |  |
| 14419 | Intestinal Diseases | C19orf2      | 0.00002  | -2.78316  |  |
| 14420 | Intestinal Diseases | EFNA3        | 0.000334 | -2.774743 |  |
| 14421 | Intestinal Diseases | AMACR        | 0.000009 | -2.733981 |  |
| 14422 | Intestinal Diseases | CCDC113      | 0.000034 | -2.696156 |  |
| 14423 | Intestinal Diseases | ARHGAP8      | 0.000084 | -2.637195 |  |
| 14424 | Intestinal Diseases | CYP2S1       | 0.000037 | -2.636245 |  |
| 14425 | Intestinal Diseases | TOP1MT       | 0.000007 | -2.597406 |  |
| 14426 | Intestinal Diseases | CFTR         | 0.000155 | -2.533039 |  |
| 14427 | Intestinal Diseases | TMEM201      | 0.000349 | -2.453447 |  |
| 14428 | Intestinal Diseases | ZNF703       | 0.000227 | -2.404688 |  |
| 14429 | Intestinal Diseases | NMNAT3       | 0.000004 | -2.403053 |  |
| 14430 | Intestinal Diseases | ABHD11       | 0.000124 | -2.312944 |  |
| 14431 | Intestinal Diseases | PPM1H        | 0.000417 | -2.307378 |  |
| 14432 | Intestinal Diseases | L2HGDH       | 0.000098 | -2.267435 |  |
| 14433 | Intestinal Diseases | MACROD1      | 0.000251 | -2.25448  |  |
| 14434 | Intestinal Diseases | IYD          | 0.000401 | -2.237171 |  |
| 14435 | Intestinal Diseases | EXPH5        | 0.00009  | -2.225301 |  |
| 14436 | Intestinal Diseases | AADAT        | 0.000126 | -2.18463  |  |
| 14437 | Intestinal Diseases | POF1B        | 0.000296 | -2.176879 |  |
| 14438 | Intestinal Diseases | C8orf33      | 0.00002  | -2.154067 |  |
| 14439 | Intestinal Diseases | NETO2        | 0.000371 | -2.153651 |  |
| 14440 | Intestinal Diseases | PHF14        | 0.000107 | -2.152611 |  |
| 14441 | Intestinal Diseases | GGH          | 0.000049 | -2.142053 |  |
| 14442 | Intestinal Diseases | ALDH1B1      | 0.000296 | -2.07956  |  |
| 14443 | Intestinal Diseases | MEST         | 0.000006 | -2.067237 |  |
| 14444 | Intestinal Diseases | WNK4         | 0.000292 | -2.063297 |  |
| 14445 | Intestinal Diseases | CIRH1A       | 0.00011  | -2.061629 |  |
| 14446 | Intestinal Diseases | PRMT3        | 0.000227 | -2.055489 |  |
| 14447 | Intestinal Diseases | RAB40B       | 0.00004  | -2.046246 |  |
| 14448 | Intestinal Diseases | PUS7         | 0.000124 | -2.045736 |  |

|       |                          |           |          |            |  |
|-------|--------------------------|-----------|----------|------------|--|
| 14449 | Intestinal Diseases      | ZKSCAN1   | 0.000046 | -2.042176  |  |
| 14450 | Intestinal Diseases      | TBRG4     | 0.000124 | -2.040378  |  |
| 14451 | Intestinal Diseases      | CXADR     | 0.000271 | -2.036179  |  |
| 14452 | Intestinal Diseases      | ZNF704    | 0.000172 | -2.025003  |  |
| 14453 | Intestinal Diseases      | SERF1A    | 0.000025 | -2.011575  |  |
| 14454 | Intestinal Diseases      | APOL6     | 0.000126 | 2.03811    |  |
| 14455 | Intestinal Diseases      | HLA-DRA   | 0.000068 | 2.047747   |  |
| 14456 | Intestinal Diseases      | CRELD2    | 0.000328 | 2.054979   |  |
| 14457 | Intestinal Diseases      | XCR1      | 0.000226 | 2.073231   |  |
| 14458 | Intestinal Diseases      | PARP9     | 0.000398 | 2.084306   |  |
| 14459 | Intestinal Diseases      | NLRC5     | 0.00029  | 2.092173   |  |
| 14460 | Intestinal Diseases      | HLA-DRB1  | 0.000069 | 2.093284   |  |
| 14461 | Intestinal Diseases      | STAT1     | 0.000143 | 2.144517   |  |
| 14462 | Intestinal Diseases      | CYSLTR1   | 0.000331 | 2.152448   |  |
| 14463 | Intestinal Diseases      | IGLV2-23  | 0.000046 | 2.167195   |  |
| 14464 | Intestinal Diseases      | GBP2      | 0.00039  | 2.184644   |  |
| 14465 | Intestinal Diseases      | RASA4     | 0.000187 | 2.240732   |  |
| 14466 | Intestinal Diseases      | LOC728392 | 0.000239 | 2.27988    |  |
| 14467 | Intestinal Diseases      | UBE2L6    | 0.00012  | 2.29084    |  |
| 14468 | Intestinal Diseases      | IGKV4-1   | 0.000009 | 2.298194   |  |
| 14469 | Intestinal Diseases      | HLA-DPA1  | 0.00009  | 2.303741   |  |
| 14470 | Intestinal Diseases      | LST1      | 0.000179 | 2.307241   |  |
| 14471 | Intestinal Diseases      | CTSC      | 0.000008 | 2.318629   |  |
| 14472 | Intestinal Diseases      | CARD16    | 0.000164 | 2.397914   |  |
| 14473 | Intestinal Diseases      | CCR2      | 0.000251 | 2.474624   |  |
| 14474 | Intestinal Diseases      | BTN3A3    | 0.000042 | 2.50311    |  |
| 14475 | Intestinal Diseases      | IGLL5     | 0.000342 | 2.579993   |  |
| 14476 | Intestinal Diseases      | CD40      | 0.000376 | 2.586738   |  |
| 14477 | Intestinal Diseases      | PSMB9     | 0.000013 | 2.620499   |  |
| 14478 | Intestinal Diseases      | CIITA     | 0.000374 | 2.620771   |  |
| 14479 | Intestinal Diseases      | SFMBT2    | 0.00009  | 2.625821   |  |
| 14480 | Intestinal Diseases      | HLA-DMA   | 0.000045 | 2.735534   |  |
| 14481 | Intestinal Diseases      | KCND3     | 0.000126 | 3.374661   |  |
| 14482 | Intestinal Diseases      | SAMD9L    | 0.000353 | 3.700721   |  |
| 14483 | Irritable Bowel Syndrome | REG1A     | 0.001231 | -83.086651 |  |
| 14484 | Irritable Bowel Syndrome | ADAMTS4   | 0.003187 | -12.858781 |  |
| 14485 | Irritable Bowel Syndrome | NR4A2     | 0.00141  | -12.319624 |  |
| 14486 | Irritable Bowel Syndrome | C4BPB     | 0.002093 | -11.220864 |  |
| 14487 | Irritable Bowel Syndrome | EGR2      | 0.00597  | -11.198472 |  |
| 14488 | Irritable Bowel Syndrome | SPINK4    | 0.000062 | -10.887655 |  |
| 14489 | Irritable Bowel Syndrome | CXCL1     | 0.002032 | -7.262449  |  |
| 14490 | Irritable Bowel Syndrome | CYR61     | 0.002526 | -5.503438  |  |
| 14491 | Irritable Bowel Syndrome | CXCL2     | 0.001029 | -5.36852   |  |
| 14492 | Irritable Bowel Syndrome | FOS       | 0.001024 | -5.232422  |  |
| 14493 | Irritable Bowel Syndrome | NOS2      | 0.002362 | -5.151254  |  |
| 14494 | Irritable Bowel Syndrome | SOCS3     | 0.000879 | -4.842444  |  |
| 14495 | Irritable Bowel Syndrome | REG4      | 0.00372  | -4.605485  |  |
| 14496 | Irritable Bowel Syndrome | EGR1      | 0.003143 | -4.268072  |  |
| 14497 | Irritable Bowel Syndrome | RGS1      | 0.001997 | -3.297169  |  |
| 14498 | Irritable Bowel Syndrome | ZC3H12A   | 0.000421 | -3.093546  |  |

|       |                          |              |          |           |  |
|-------|--------------------------|--------------|----------|-----------|--|
| 14499 | Irritable Bowel Syndrome | CFB          | 0.004256 | -3.045857 |  |
| 14500 | Irritable Bowel Syndrome | AREG         | 0.000857 | -2.825324 |  |
| 14501 | Irritable Bowel Syndrome | IGFBP2       | 0.000553 | -2.752176 |  |
| 14502 | Irritable Bowel Syndrome | GBP4         | 0.006339 | -2.527755 |  |
| 14503 | Irritable Bowel Syndrome | IER3         | 0.001264 | -2.52473  |  |
| 14504 | Irritable Bowel Syndrome | CCL4         | 0.004244 | -2.509801 |  |
| 14505 | Irritable Bowel Syndrome | JUNB         | 0.000106 | -2.496438 |  |
| 14506 | Irritable Bowel Syndrome | NCOA7        | 0.001264 | -2.490791 |  |
| 14507 | Irritable Bowel Syndrome | DUSP1        | 0.00129  | -2.481697 |  |
| 14508 | Irritable Bowel Syndrome | ERO1L        | 0.006313 | -2.425163 |  |
| 14509 | Irritable Bowel Syndrome | PFKFB3       | 0.006233 | -2.377068 |  |
| 14510 | Irritable Bowel Syndrome | KLF2         | 0.000505 | -2.345314 |  |
| 14511 | Irritable Bowel Syndrome | RTEL1        | 0.001264 | -2.302734 |  |
| 14512 | Irritable Bowel Syndrome | TYMP         | 0.003595 | -2.300272 |  |
| 14513 | Irritable Bowel Syndrome | C2           | 0.003497 | -2.277307 |  |
| 14514 | Irritable Bowel Syndrome | GBP1         | 0.003807 | -2.272556 |  |
| 14515 | Irritable Bowel Syndrome | PHLDA1       | 0.007508 | -2.213751 |  |
| 14516 | Irritable Bowel Syndrome | ERRFI1       | 0.004336 | -2.192916 |  |
| 14517 | Irritable Bowel Syndrome | NAMPT        | 0.002526 | -2.192039 |  |
| 14518 | Irritable Bowel Syndrome | ISG20        | 0.003187 | -2.140839 |  |
| 14519 | Irritable Bowel Syndrome | NFKBIZ       | 0.000486 | -2.117779 |  |
| 14520 | Irritable Bowel Syndrome | TAP1         | 0.000491 | -2.110082 |  |
| 14521 | Irritable Bowel Syndrome | MAFF         | 0.000264 | -2.102772 |  |
| 14522 | Irritable Bowel Syndrome | PSMB9        | 0.004336 | -2.078523 |  |
| 14523 | Irritable Bowel Syndrome | HK2          | 0.002417 | -2.074627 |  |
| 14524 | Irritable Bowel Syndrome | LINC00152    | 0.004936 | -2.01997  |  |
| 14525 | Irritable Bowel Syndrome | CASP5        | 0.002526 | -2.008472 |  |
| 14526 | Irritable Bowel Syndrome | APOL2        | 0.005286 | -2.002322 |  |
| 14527 | Irritable Bowel Syndrome | AOC3         | 0.000264 | 2.002483  |  |
| 14528 | Irritable Bowel Syndrome | TMEM98       | 0.002032 | 2.031242  |  |
| 14529 | Irritable Bowel Syndrome | PTN          | 0.001921 | 2.034433  |  |
| 14530 | Irritable Bowel Syndrome | IL1R2        | 0.002032 | 2.192872  |  |
| 14531 | Irritable Bowel Syndrome | ISX          | 0.004015 | 2.223209  |  |
| 14532 | Irritable Bowel Syndrome | LOC100506542 | 0.000421 | 2.237208  |  |
| 14533 | Irritable Bowel Syndrome | CXCL12       | 0.001997 | 2.249309  |  |
| 14534 | Irritable Bowel Syndrome | LRRN2        | 0.006445 | 2.250284  |  |
| 14535 | Irritable Bowel Syndrome | SPON1        | 0.001264 | 2.372523  |  |
| 14536 | Irritable Bowel Syndrome | B3GNT7       | 0.000625 | 2.449062  |  |
| 14537 | Irritable Bowel Syndrome | MFSD4        | 0.007025 | 2.520304  |  |
| 14538 | Irritable Bowel Syndrome | CAPN13       | 0.002207 | 2.550225  |  |
| 14539 | Irritable Bowel Syndrome | LGALS2       | 0.001997 | 2.643832  |  |
| 14540 | Irritable Bowel Syndrome | CRYBA2       | 0.001997 | 2.679138  |  |
| 14541 | Irritable Bowel Syndrome | SOSTDC1      | 0.001276 | 2.904439  |  |
| 14542 | Irritable Bowel Syndrome | EFEMP1       | 0.000625 | 2.920202  |  |
| 14543 | Irritable Bowel Syndrome | TPH1         | 0.000625 | 3.013002  |  |
| 14544 | Irritable Bowel Syndrome | FN1          | 0.000816 | 3.022     |  |
| 14545 | Irritable Bowel Syndrome | SLC37A2      | 0.000324 | 3.111415  |  |
| 14546 | Irritable Bowel Syndrome | PYY          | 0.002014 | 3.138991  |  |
| 14547 | Irritable Bowel Syndrome | GCG          | 0.006348 | 3.18315   |  |
| 14548 | Irritable Bowel Syndrome | FRAS1        | 0.002818 | 3.39953   |  |

|       |                          |              |          |            |  |
|-------|--------------------------|--------------|----------|------------|--|
| 14549 | Irritable Bowel Syndrome | NTRK2        | 0.005068 | 3.656479   |  |
| 14550 | Irritable Bowel Syndrome | INSL5        | 0.003187 | 4.574727   |  |
| 14551 | Irritable Bowel Syndrome | LOC100506659 | 0.003692 | 4.8718     |  |
| 14552 | Irritable Bowel Syndrome | SST          | 0.007025 | 5.490615   |  |
| 14553 | Irritable Bowel Syndrome | HOXD13       | 0.003847 | 5.901125   |  |
| 14554 | Irritable Bowel Syndrome | TTR          | 0.005754 | 6.120098   |  |
| 14555 | Irritable Bowel Syndrome | WASF3        | 0.005456 | 7.015248   |  |
| 14556 | Irritable Bowel Syndrome | TNNC1        | 0.002186 | 7.839611   |  |
| 14557 | Irritable Bowel Syndrome | CLDN8        | 0.006339 | 8.740012   |  |
| 14558 | Irritable Bowel Syndrome | FMN2         | 0.003283 | 8.772553   |  |
| 14559 | Irritable Bowel Syndrome | LOC389023    | 0.001997 | 8.886277   |  |
| 14560 | Irritable Bowel Syndrome | DSCAML1      | 0.00141  | 9.19284    |  |
| 14561 | Irritable Bowel Syndrome | HOXD11       | 0.001231 | 10.815761  |  |
| 14562 | Irritable Bowel Syndrome | RASSF10      | 0.000857 | 11.359478  |  |
| 14563 | Irritable Bowel Syndrome | HOXD10       | 0.001868 | 16.483265  |  |
| 14564 | isolation aspects        | CFH          | 0.001969 | -11.140652 |  |
| 14565 | isolation aspects        | RBM15        | 0.004791 | -3.808127  |  |
| 14566 | isolation aspects        | UQCC         | 0.005408 | -3.337098  |  |
| 14567 | isolation aspects        | PDCD6        | 0.000732 | -3.30841   |  |
| 14568 | isolation aspects        | HELLS        | 0.004596 | -3.245423  |  |
| 14569 | isolation aspects        | ZNF160       | 0.004021 | -3.209786  |  |
| 14570 | isolation aspects        | POLR2J2      | 0.004215 | -3.038889  |  |
| 14571 | isolation aspects        | ZNF207       | 0.004792 | -2.972298  |  |
| 14572 | isolation aspects        | WHSC1        | 0.001268 | -2.880382  |  |
| 14573 | isolation aspects        | LOC100129637 | 0.002981 | -2.861468  |  |
| 14574 | isolation aspects        | PLXND1       | 0.003286 | -2.855506  |  |
| 14575 | isolation aspects        | AFG3L1P      | 0.002109 | -2.846511  |  |
| 14576 | isolation aspects        | LOC595101    | 0.000327 | -2.818768  |  |
| 14577 | isolation aspects        | BMS1P1       | 0.000316 | -2.804696  |  |
| 14578 | isolation aspects        | PRKDC        | 0.00241  | -2.803191  |  |
| 14579 | isolation aspects        | ANGPT1       | 0.00071  | -2.796247  |  |
| 14580 | isolation aspects        | FAM173B      | 0.003152 | -2.753963  |  |
| 14581 | isolation aspects        | CDCA7        | 0.004748 | -2.753797  |  |
| 14582 | isolation aspects        | RGNEF        | 0.005098 | -2.707656  |  |
| 14583 | isolation aspects        | SRSF4        | 0.002427 | -2.698683  |  |
| 14584 | isolation aspects        | MMRN2        | 0.001969 | -2.660392  |  |
| 14585 | isolation aspects        | KIAA1377     | 0.001162 | -2.631271  |  |
| 14586 | isolation aspects        | ATP2C2       | 0.005467 | -2.576461  |  |
| 14587 | isolation aspects        | CDKN2C       | 0.001025 | -2.504487  |  |
| 14588 | isolation aspects        | LOC399753    | 0.006485 | -2.480526  |  |
| 14589 | isolation aspects        | CRIPAK       | 0.005174 | -2.417205  |  |
| 14590 | isolation aspects        | PTK2         | 0.001884 | -2.380796  |  |
| 14591 | isolation aspects        | IFT80        | 0.003512 | -2.361122  |  |
| 14592 | isolation aspects        | C2orf67      | 0.003336 | -2.341392  |  |
| 14593 | isolation aspects        | ZADH2        | 0.006011 | -2.325923  |  |
| 14594 | isolation aspects        | CREBZF       | 0.001794 | -2.300725  |  |
| 14595 | isolation aspects        | MYO19        | 0.006064 | -2.275494  |  |
| 14596 | isolation aspects        | CHD3         | 0.004639 | -2.229819  |  |
| 14597 | isolation aspects        | NOC2L        | 0.003181 | -2.226973  |  |
| 14598 | isolation aspects        | BRCA1        | 0.005839 | -2.224053  |  |

|       |                   |              |          |           |  |
|-------|-------------------|--------------|----------|-----------|--|
| 14599 | isolation aspects | NF1          | 0.004108 | -2.212946 |  |
| 14600 | isolation aspects | CHD9         | 0.004107 | -2.20314  |  |
| 14601 | isolation aspects | XPO1         | 0.000517 | -2.193761 |  |
| 14602 | isolation aspects | TTC23        | 0.005733 | -2.18306  |  |
| 14603 | isolation aspects | EML4         | 0.002343 | -2.177747 |  |
| 14604 | isolation aspects | SGK269       | 0.005301 | -2.172195 |  |
| 14605 | isolation aspects | PHKA2        | 0.002728 | -2.171707 |  |
| 14606 | isolation aspects | RBBP4        | 0.005467 | -2.163389 |  |
| 14607 | isolation aspects | LOC100507153 | 0.002967 | -2.133094 |  |
| 14608 | isolation aspects | ZBTB44       | 0.000125 | -2.120909 |  |
| 14609 | isolation aspects | WDR90        | 0.003152 | -2.115398 |  |
| 14610 | isolation aspects | PATZ1        | 0.002785 | -2.11183  |  |
| 14611 | isolation aspects | ZNF248       | 0.004792 | -2.098686 |  |
| 14612 | isolation aspects | SFRS4        | 0.003692 | -2.091499 |  |
| 14613 | isolation aspects | SGK494       | 0.001756 | -2.052257 |  |
| 14614 | isolation aspects | USP13        | 0.001498 | -2.050189 |  |
| 14615 | isolation aspects | ALDH7A1      | 0.004792 | -2.049889 |  |
| 14616 | isolation aspects | MPHOSPH9     | 0.004116 | -2.020827 |  |
| 14617 | isolation aspects | KIAA0467     | 0.002485 | -2.017488 |  |
| 14618 | isolation aspects | OSBPL3       | 0.000732 | 2.00378   |  |
| 14619 | isolation aspects | SERTAD1      | 0.003463 | 2.024163  |  |
| 14620 | isolation aspects | JMJD6        | 0.001662 | 2.039276  |  |
| 14621 | isolation aspects | RAP2B        | 0.000671 | 2.040388  |  |
| 14622 | isolation aspects | NDFIP2       | 0.002765 | 2.051303  |  |
| 14623 | isolation aspects | TRIM15       | 0.006381 | 2.052602  |  |
| 14624 | isolation aspects | IFNAR2       | 0.002588 | 2.053709  |  |
| 14625 | isolation aspects | HN1          | 0.006181 | 2.061183  |  |
| 14626 | isolation aspects | SLC25A25     | 0.00301  | 2.074173  |  |
| 14627 | isolation aspects | KLF10        | 0.001147 | 2.087965  |  |
| 14628 | isolation aspects | SBDS         | 0.001552 | 2.112631  |  |
| 14629 | isolation aspects | ATP6V0E1     | 0.005141 | 2.127361  |  |
| 14630 | isolation aspects | RNF7         | 0.004791 | 2.144269  |  |
| 14631 | isolation aspects | LHFPL2       | 0.006011 | 2.147585  |  |
| 14632 | isolation aspects | HIST1H2BF    | 0.000517 | 2.162432  |  |
| 14633 | isolation aspects | RHPN2        | 0.003692 | 2.162838  |  |
| 14634 | isolation aspects | MAP1LC3B     | 0.004108 | 2.164625  |  |
| 14635 | isolation aspects | ALAS1        | 0.004861 | 2.183211  |  |
| 14636 | isolation aspects | HIST1H2BE    | 0.003152 | 2.190406  |  |
| 14637 | isolation aspects | SELK         | 0.000728 | 2.191273  |  |
| 14638 | isolation aspects | CDV3         | 0.005041 | 2.199458  |  |
| 14639 | isolation aspects | PERP         | 0.00022  | 2.202057  |  |
| 14640 | isolation aspects | HLA-F        | 0.004108 | 2.207022  |  |
| 14641 | isolation aspects | AMOTL2       | 0.001552 | 2.213932  |  |
| 14642 | isolation aspects | PPP2CB       | 0.006104 | 2.239827  |  |
| 14643 | isolation aspects | ARL8B        | 0.005085 | 2.245124  |  |
| 14644 | isolation aspects | CFLAR        | 0.003477 | 2.250863  |  |
| 14645 | isolation aspects | DNAJB1       | 0.00241  | 2.280388  |  |
| 14646 | isolation aspects | PDE12        | 0.001268 | 2.282691  |  |
| 14647 | isolation aspects | S100A11      | 0.0036   | 2.290681  |  |
| 14648 | isolation aspects | IER5         | 0.004748 | 2.297363  |  |



|       |                   |           |          |          |  |
|-------|-------------------|-----------|----------|----------|--|
| 14649 | isolation aspects | ARL5B     | 0.000244 | 2.30292  |  |
| 14650 | isolation aspects | FOXN2     | 0.001756 | 2.30656  |  |
| 14651 | isolation aspects | ERRFI1    | 0.004065 | 2.30757  |  |
| 14652 | isolation aspects | NFKBIE    | 0.005973 | 2.353556 |  |
| 14653 | isolation aspects | MTHFSD    | 0.005298 | 2.359503 |  |
| 14654 | isolation aspects | STK17A    | 0.000125 | 2.396145 |  |
| 14655 | isolation aspects | HIGD1A    | 0.001756 | 2.400591 |  |
| 14656 | isolation aspects | PLCXD2    | 0.004147 | 2.435619 |  |
| 14657 | isolation aspects | HIST1H2BI | 0.002829 | 2.438257 |  |
| 14658 | isolation aspects | GLS       | 0.001794 | 2.44452  |  |
| 14659 | isolation aspects | TPMT      | 0.004143 | 2.452997 |  |
| 14660 | isolation aspects | PIM1      | 0.001147 | 2.458919 |  |
| 14661 | isolation aspects | LGALS8    | 0.001679 | 2.471341 |  |
| 14662 | isolation aspects | CCDC51    | 0.006104 | 2.480221 |  |
| 14663 | isolation aspects | HIST1H2BK | 0.001662 | 2.514361 |  |
| 14664 | isolation aspects | SERTAD2   | 0.0044   | 2.534205 |  |
| 14665 | isolation aspects | AREG      | 0.000389 | 2.539078 |  |
| 14666 | isolation aspects | OCLN      | 0.001052 | 2.551247 |  |
| 14667 | isolation aspects | CPEB2     | 0.005988 | 2.565899 |  |
| 14668 | isolation aspects | MDFI      | 0.004314 | 2.570407 |  |
| 14669 | isolation aspects | HCCS      | 0.004748 | 2.584927 |  |
| 14670 | isolation aspects | C6orf132  | 0.001087 | 2.612396 |  |
| 14671 | isolation aspects | RAB22A    | 0.001756 | 2.613734 |  |
| 14672 | isolation aspects | ANXA3     | 0.00508  | 2.635969 |  |
| 14673 | isolation aspects | MXD1      | 0.000125 | 2.649865 |  |
| 14674 | isolation aspects | RALA      | 0.002459 | 2.658884 |  |
| 14675 | isolation aspects | TPM4      | 0.003336 | 2.660044 |  |
| 14676 | isolation aspects | TNFSF9    | 0.000316 | 2.669576 |  |
| 14677 | isolation aspects | RND3      | 0.000125 | 2.709598 |  |
| 14678 | isolation aspects | TIPARP    | 0.004639 | 2.712231 |  |
| 14679 | isolation aspects | DUSP10    | 0.000754 | 2.723635 |  |
| 14680 | isolation aspects | SFN       | 0.004323 | 2.72591  |  |
| 14681 | isolation aspects | EPB41L5   | 0.00032  | 2.728434 |  |
| 14682 | isolation aspects | KLF4      | 0.001474 | 2.76071  |  |
| 14683 | isolation aspects | OBFC2A    | 0.003595 | 2.787294 |  |
| 14684 | isolation aspects | TAP1      | 0.003545 | 2.824943 |  |
| 14685 | isolation aspects | FGD6      | 0.004373 | 2.855279 |  |
| 14686 | isolation aspects | NAMPT     | 0.005085 | 2.873318 |  |
| 14687 | isolation aspects | ZNF165    | 0.002504 | 2.875868 |  |
| 14688 | isolation aspects | CLDN4     | 0.00071  | 2.911135 |  |
| 14689 | isolation aspects | SEMA7A    | 0.001969 | 2.932253 |  |
| 14690 | isolation aspects | GJB3      | 0.004107 | 2.938013 |  |
| 14691 | isolation aspects | NFKBIB    | 0.003234 | 2.941764 |  |
| 14692 | isolation aspects | TAGAP     | 0.001969 | 2.980919 |  |
| 14693 | isolation aspects | CD47      | 0.005041 | 2.995743 |  |
| 14694 | isolation aspects | EZR       | 0.00178  | 3.023584 |  |
| 14695 | isolation aspects | CLIC5     | 0.004147 | 3.081047 |  |
| 14696 | isolation aspects | DPH3      | 0.001748 | 3.091732 |  |
| 14697 | isolation aspects | LAMB3     | 0.005141 | 3.103992 |  |
| 14698 | isolation aspects | LMO7      | 0.005034 | 3.110319 |  |

|       |                    |              |          |           |  |
|-------|--------------------|--------------|----------|-----------|--|
| 14699 | isolation aspects  | LOC100506979 | 0.004639 | 3.130702  |  |
| 14700 | isolation aspects  | HIST1H2BH    | 0.000517 | 3.147934  |  |
| 14701 | isolation aspects  | TICAM1       | 0.000191 | 3.159202  |  |
| 14702 | isolation aspects  | GAN          | 0.002595 | 3.170409  |  |
| 14703 | isolation aspects  | IL23A        | 0.001147 | 3.182919  |  |
| 14704 | isolation aspects  | LOC440896    | 0.001764 | 3.190618  |  |
| 14705 | isolation aspects  | CLDN23       | 0.005467 | 3.243061  |  |
| 14706 | isolation aspects  | H2BFS        | 0.00071  | 3.246703  |  |
| 14707 | isolation aspects  | CHMP2B       | 0.000732 | 3.259293  |  |
| 14708 | isolation aspects  | MAFF         | 0.00071  | 3.270931  |  |
| 14709 | isolation aspects  | HIST1H2BD    | 0.001211 | 3.297822  |  |
| 14710 | isolation aspects  | GADD45A      | 0.005141 | 3.349209  |  |
| 14711 | isolation aspects  | IFRD1        | 0.000229 | 3.364611  |  |
| 14712 | isolation aspects  | DDA1         | 0.006252 | 3.442754  |  |
| 14713 | isolation aspects  | USP53        | 0.003981 | 3.463071  |  |
| 14714 | isolation aspects  | RHOF         | 0.00178  | 3.465639  |  |
| 14715 | isolation aspects  | RAB9A        | 0.003181 | 3.471487  |  |
| 14716 | isolation aspects  | PPP1R15A     | 0.006064 | 3.541813  |  |
| 14717 | isolation aspects  | LOC439990    | 0.004107 | 3.5739    |  |
| 14718 | isolation aspects  | ID2          | 0.003434 | 3.739528  |  |
| 14719 | isolation aspects  | HIST1H2BG    | 0.004577 | 3.788688  |  |
| 14720 | isolation aspects  | PPP4R1L      | 0.003181 | 3.813426  |  |
| 14721 | isolation aspects  | GPRC5A       | 0.001717 | 3.866214  |  |
| 14722 | isolation aspects  | EDN1         | 0.001662 | 3.996734  |  |
| 14723 | isolation aspects  | KLF6         | 0.000125 | 4.047716  |  |
| 14724 | isolation aspects  | ZFAND2A      | 0.001662 | 4.179808  |  |
| 14725 | isolation aspects  | TNFAIP3      | 0.001662 | 4.181002  |  |
| 14726 | isolation aspects  | FOSL1        | 0.002785 | 4.261609  |  |
| 14727 | isolation aspects  | HIST2H2AA3   | 0.002775 | 4.307458  |  |
| 14728 | isolation aspects  | CXCL16       | 0.001552 | 4.316383  |  |
| 14729 | isolation aspects  | NCEH1        | 0.004107 | 4.415097  |  |
| 14730 | isolation aspects  | PMAIP1       | 0.002949 | 4.535741  |  |
| 14731 | isolation aspects  | TUBB2A       | 0.001648 | 4.71727   |  |
| 14732 | isolation aspects  | TM4SF1       | 0.004059 | 4.932563  |  |
| 14733 | isolation aspects  | NFKBIA       | 0.004108 | 5.051207  |  |
| 14734 | isolation aspects  | KIAA1609     | 0.003254 | 5.184877  |  |
| 14735 | isolation aspects  | DUSP5        | 0.001662 | 5.413098  |  |
| 14736 | isolation aspects  | EMP1         | 0.001764 | 5.681152  |  |
| 14737 | isolation aspects  | PLAUR        | 0.000229 | 5.92149   |  |
| 14738 | isolation aspects  | IL32         | 0.002728 | 6.867646  |  |
| 14739 | isolation aspects  | C10orf116    | 0.003181 | 7.514991  |  |
| 14740 | isolation aspects  | BIRC3        | 0.00642  | 7.908702  |  |
| 14741 | isolation aspects  | LAMC2        | 0.003986 | 9.26201   |  |
| 14742 | isolation aspects  | CDA          | 0.005862 | 9.815259  |  |
| 14743 | Laboratory culture | MAP7         | 0.000652 | -7.749575 |  |
| 14744 | Laboratory culture | MAPK13       | 0.000093 | -5.139744 |  |
| 14745 | Laboratory culture | ROD1         | 0.000155 | -4.802888 |  |
| 14746 | Laboratory culture | RAB3IP       | 0.000218 | -4.603243 |  |
| 14747 | Laboratory culture | WWP1         | 0.000529 | -3.9455   |  |
| 14748 | Laboratory culture | RNASET2      | 0.000088 | -3.751019 |  |

|       |                    |           |          |           |  |
|-------|--------------------|-----------|----------|-----------|--|
| 14749 | Laboratory culture | PPFIBP2   | 0.000541 | -3.362162 |  |
| 14750 | Laboratory culture | BAZ2B     | 0.000375 | -3.040968 |  |
| 14751 | Laboratory culture | CYP2R1    | 0.000348 | -2.97435  |  |
| 14752 | Laboratory culture | PHIP      | 0.00018  | -2.916824 |  |
| 14753 | Laboratory culture | OCIAD2    | 0.000516 | -2.862596 |  |
| 14754 | Laboratory culture | SYK       | 0.000144 | -2.815386 |  |
| 14755 | Laboratory culture | KIF21A    | 0.000493 | -2.764031 |  |
| 14756 | Laboratory culture | LOC387921 | 0.000603 | -2.703054 |  |
| 14757 | Laboratory culture | SLC25A5   | 0.000533 | -2.551182 |  |
| 14758 | Laboratory culture | MRPS35    | 0.000166 | -2.52774  |  |
| 14759 | Laboratory culture | PPIG      | 0.000425 | -2.505525 |  |
| 14760 | Laboratory culture | GUSB      | 0.00007  | -2.451689 |  |
| 14761 | Laboratory culture | ANXA4     | 0.000425 | -2.440149 |  |
| 14762 | Laboratory culture | ZNF165    | 0.000062 | -2.402117 |  |
| 14763 | Laboratory culture | TMEM41B   | 0.000615 | -2.399405 |  |
| 14764 | Laboratory culture | ZNF721    | 0.000664 | -2.377136 |  |
| 14765 | Laboratory culture | ZNF800    | 0.000597 | -2.347068 |  |
| 14766 | Laboratory culture | C4ORF16   | 0.000093 | -2.332935 |  |
| 14767 | Laboratory culture | FLJ34969  | 0.000597 | -2.282324 |  |
| 14768 | Laboratory culture | CCDC76    | 0.000599 | -2.225771 |  |
| 14769 | Laboratory culture | TARDBP    | 0.000574 | -2.221869 |  |
| 14770 | Laboratory culture | RNF141    | 0.000516 | -2.206677 |  |
| 14771 | Laboratory culture | C11ORF71  | 0.000545 | -2.102567 |  |
| 14772 | Laboratory culture | RPS24     | 0.000286 | -2.072647 |  |
| 14773 | Laboratory culture | DGKD      | 0.000219 | -2.026221 |  |
| 14774 | Laboratory culture | RPL5      | 0.000282 | -2.004885 |  |
| 14775 | Laboratory culture | RGS10     | 0.000375 | 2.006736  |  |
| 14776 | Laboratory culture | CCDC127   | 0.000514 | 2.023144  |  |
| 14777 | Laboratory culture | RBMS2     | 0.000284 | 2.071696  |  |
| 14778 | Laboratory culture | TNFAIP1   | 0.000398 | 2.089194  |  |
| 14779 | Laboratory culture | GAPDH     | 0.000425 | 2.158625  |  |
| 14780 | Laboratory culture | ADAMTSL5  | 0.000486 | 2.27493   |  |
| 14781 | Laboratory culture | NPR2      | 0.000399 | 2.282587  |  |
| 14782 | Laboratory culture | SDF4      | 0.000665 | 2.289924  |  |
| 14783 | Laboratory culture | MST150    | 0.000125 | 2.311495  |  |
| 14784 | Laboratory culture | SEC22C    | 0.000369 | 2.345013  |  |
| 14785 | Laboratory culture | NTAN1     | 0.00061  | 2.400488  |  |
| 14786 | Laboratory culture | RIC8A     | 0.000436 | 2.464435  |  |
| 14787 | Laboratory culture | ZBTB4     | 0.000201 | 2.481596  |  |
| 14788 | Laboratory culture | SLC35E1   | 0.000436 | 2.585884  |  |
| 14789 | Laboratory culture | PNMA1     | 0.000603 | 2.646874  |  |
| 14790 | Laboratory culture | ABI2      | 0.000191 | 2.657783  |  |
| 14791 | Laboratory culture | PVRL2     | 0.000187 | 2.739545  |  |
| 14792 | Laboratory culture | M-RIP     | 0.000292 | 2.875153  |  |
| 14793 | Laboratory culture | MPV17     | 0.000334 | 2.87788   |  |
| 14794 | Laboratory culture | SPARC     | 0.000665 | 2.977244  |  |
| 14795 | Laboratory culture | EXT1      | 0.000425 | 3.142807  |  |
| 14796 | Laboratory culture | DYRK3     | 0.000062 | 3.199536  |  |
| 14797 | Laboratory culture | TCEAL3    | 0.000602 | 3.283354  |  |
| 14798 | Laboratory culture | VKORC1    | 0.000031 | 3.288607  |  |

|       |                    |           |          |            |  |
|-------|--------------------|-----------|----------|------------|--|
| 14799 | Laboratory culture | TPM1      | 0.000436 | 3.396558   |  |
| 14800 | Laboratory culture | KIAA1754  | 0.000235 | 3.642638   |  |
| 14801 | Laboratory culture | HSPB2     | 0.000603 | 3.783672   |  |
| 14802 | Laboratory culture | FKSG30    | 0.000436 | 3.868274   |  |
| 14803 | Laboratory culture | MYADM     | 0.000189 | 3.982227   |  |
| 14804 | Laboratory culture | DFNA5     | 0.000086 | 4.008277   |  |
| 14805 | Laboratory culture | PELO      | 0.000599 | 4.297751   |  |
| 14806 | Laboratory culture | RAB6IP1   | 0.000219 | 4.356722   |  |
| 14807 | Laboratory culture | NINJ1     | 0.00058  | 4.385068   |  |
| 14808 | Laboratory culture | GABARAPL1 | 0.000031 | 4.474687   |  |
| 14809 | Laboratory culture | ACTN1     | 0.000001 | 4.790828   |  |
| 14810 | Laboratory culture | MSN       | 0.000155 | 4.827876   |  |
| 14811 | Laboratory culture | VIM       | 0.000441 | 4.942041   |  |
| 14812 | Laboratory culture | ACTA2     | 0.000155 | 5.024653   |  |
| 14813 | Laboratory culture | CYR61     | 0.000093 | 5.299898   |  |
| 14814 | Laboratory culture | DEGS1     | 0.000035 | 5.682363   |  |
| 14815 | Laboratory culture | LGALS1    | 0.000071 | 5.933415   |  |
| 14816 | Laboratory culture | NGFRAP1   | 0.000501 | 6.226585   |  |
| 14817 | Laboratory culture | COL1A2    | 0.000375 | 10.191927  |  |
| 14818 | Laboratory culture | FAM20C    | 0.000468 | 10.313947  |  |
| 14819 | Laboratory culture | DKK3      | 0.000597 | 10.416492  |  |
| 14820 | Laboratory culture | VASN      | 0.000441 | 12.264142  |  |
| 14821 | Laser              | APOB      | 0.000013 | -22.114208 |  |
| 14822 | Laser              | APOA2     | 0.000028 | -18.076081 |  |
| 14823 | Laser              | RBP4      | 0.000019 | -16.715013 |  |
| 14824 | Laser              | APOA1     | 0.000037 | -16.502043 |  |
| 14825 | Laser              | APOH      | 0.000028 | -14.087162 |  |
| 14826 | Laser              | KISS1R    | 0        | -12.825872 |  |
| 14827 | Laser              | FOLR1     | 0        | -12.631292 |  |
| 14828 | Laser              | DHRS2     | 0        | -11.89824  |  |
| 14829 | Laser              | HAVCR1    | 0.000009 | -10.208146 |  |
| 14830 | Laser              | LRP2      | 0.000006 | -8.705283  |  |
| 14831 | Laser              | ANXA9     | 0        | -7.556247  |  |
| 14832 | Laser              | DMKN      | 0.000008 | -7.528223  |  |
| 14833 | Laser              | TNNT1     | 0        | -7.409935  |  |
| 14834 | Laser              | REEP6     | 0.000016 | -7.257684  |  |
| 14835 | Laser              | SPAG4     | 0.000017 | -7.002475  |  |
| 14836 | Laser              | APOM      | 0.000007 | -6.978881  |  |
| 14837 | Laser              | SOAT2     | 0.000004 | -6.287131  |  |
| 14838 | Laser              | FBXO2     | 0.000006 | -5.985957  |  |
| 14839 | Laser              | TET1      | 0.000032 | -5.869496  |  |
| 14840 | Laser              | LOC728449 | 0.000015 | -5.817347  |  |
| 14841 | Laser              | LOC285733 | 0.000011 | -5.770381  |  |
| 14842 | Laser              | C12orf59  | 0.000006 | -5.437558  |  |
| 14843 | Laser              | DIO1      | 0.000011 | -5.403243  |  |
| 14844 | Laser              | DNASE1    | 0.000003 | -5.360365  |  |
| 14845 | Laser              | TMEM92    | 0.000001 | -5.294438  |  |
| 14846 | Laser              | UCA1      | 0.000024 | -4.988     |  |
| 14847 | Laser              | CDK19     | 0.00001  | -4.894224  |  |
| 14848 | Laser              | SLC46A1   | 0.000008 | -4.35098   |  |

|       |       |              |          |           |  |
|-------|-------|--------------|----------|-----------|--|
| 14849 | Laser | GATA3        | 0.00001  | -4.335344 |  |
| 14850 | Laser | TM7SF2       | 0.00002  | -4.293242 |  |
| 14851 | Laser | ZNF488       | 0.000002 | -4.204328 |  |
| 14852 | Laser | TNNC1        | 0.000008 | -4.031651 |  |
| 14853 | Laser | TFF2         | 0.000001 | -3.972717 |  |
| 14854 | Laser | NCRNA00286A  | 0.000001 | -3.939098 |  |
| 14855 | Laser | PRODH        | 0.000036 | -3.888523 |  |
| 14856 | Laser | GET4         | 0.000035 | -3.837749 |  |
| 14857 | Laser | PECR         | 0        | -3.800593 |  |
| 14858 | Laser | F7           | 0        | -3.759021 |  |
| 14859 | Laser | DLX4         | 0.000011 | -3.716275 |  |
| 14860 | Laser | HSD17B12     | 0.000017 | -3.708705 |  |
| 14861 | Laser | SLC6A8       | 0.000004 | -3.701869 |  |
| 14862 | Laser | FAM169A      | 0.000003 | -3.612246 |  |
| 14863 | Laser | SYTL1        | 0.00001  | -3.596879 |  |
| 14864 | Laser | PALM3        | 0        | -3.591714 |  |
| 14865 | Laser | SLC6A10P     | 0.000003 | -3.552675 |  |
| 14866 | Laser | LRP5         | 0.000007 | -3.479929 |  |
| 14867 | Laser | IGF2BP1      | 0.000031 | -3.445045 |  |
| 14868 | Laser | AIG1         | 0        | -3.403283 |  |
| 14869 | Laser | CHKA         | 0.000002 | -3.397474 |  |
| 14870 | Laser | MSX2         | 0.00001  | -3.388462 |  |
| 14871 | Laser | SLCO2B1      | 0.000014 | -3.309305 |  |
| 14872 | Laser | RAB11FIP4    | 0.000028 | -3.271163 |  |
| 14873 | Laser | TMEM27       | 0.000001 | -3.230254 |  |
| 14874 | Laser | ASGR1        | 0.000028 | -3.219771 |  |
| 14875 | Laser | TGFBR3       | 0        | -3.157052 |  |
| 14876 | Laser | LOC285708    | 0.000001 | -3.152352 |  |
| 14877 | Laser | FAM117A      | 0.000011 | -3.132597 |  |
| 14878 | Laser | LOC285943    | 0.000007 | -3.117586 |  |
| 14879 | Laser | DBP          | 0.000001 | -3.101255 |  |
| 14880 | Laser | NAGS         | 0.000003 | -3.099091 |  |
| 14881 | Laser | LIMS3        | 0.000009 | -3.070937 |  |
| 14882 | Laser | SLC30A1      | 0.000014 | -3.007005 |  |
| 14883 | Laser | DNAH14       | 0.00003  | -2.95949  |  |
| 14884 | Laser | SERPINA5     | 0.000002 | -2.956248 |  |
| 14885 | Laser | CHCHD5       | 0        | -2.942043 |  |
| 14886 | Laser | TEX19        | 0.000009 | -2.939232 |  |
| 14887 | Laser | P2RX4        | 0.000032 | -2.932601 |  |
| 14888 | Laser | PEX13        | 0.000013 | -2.92411  |  |
| 14889 | Laser | GGT1         | 0        | -2.889186 |  |
| 14890 | Laser | PAK6         | 0.000003 | -2.843385 |  |
| 14891 | Laser | LOC100505876 | 0        | -2.820806 |  |
| 14892 | Laser | SOX30        | 0.000036 | -2.813489 |  |
| 14893 | Laser | SUV420H1     | 0.000003 | -2.811511 |  |
| 14894 | Laser | SH3TC1       | 0.000003 | -2.807969 |  |
| 14895 | Laser | LPCAT2       | 0.00001  | -2.801799 |  |
| 14896 | Laser | LOC100505712 | 0.000026 | -2.760311 |  |
| 14897 | Laser | RHOF         | 0.000009 | -2.758727 |  |
| 14898 | Laser | C21orf129    | 0.000007 | -2.755186 |  |

|       |       |              |          |           |  |
|-------|-------|--------------|----------|-----------|--|
| 14899 | Laser | TRMT2B       | 0        | -2.723715 |  |
| 14900 | Laser | LOC439990    | 0.000002 | -2.714572 |  |
| 14901 | Laser | FAM69B       | 0.000006 | -2.706077 |  |
| 14902 | Laser | DHCR7        | 0.000019 | -2.646961 |  |
| 14903 | Laser | C20orf11     | 0.000004 | -2.637912 |  |
| 14904 | Laser | LHX2         | 0.000001 | -2.632749 |  |
| 14905 | Laser | TMEM160      | 0.000024 | -2.615883 |  |
| 14906 | Laser | C10orf140    | 0.000005 | -2.57673  |  |
| 14907 | Laser | PPFIA1       | 0.000007 | -2.566938 |  |
| 14908 | Laser | STX3         | 0.000021 | -2.551077 |  |
| 14909 | Laser | CEP57        | 0.000032 | -2.54686  |  |
| 14910 | Laser | C22orf45     | 0.000023 | -2.535703 |  |
| 14911 | Laser | ZNF638       | 0.000039 | -2.532399 |  |
| 14912 | Laser | SERPINA4     | 0.00003  | -2.532089 |  |
| 14913 | Laser | SLC37A4      | 0.000023 | -2.525965 |  |
| 14914 | Laser | TMEM38B      | 0.000022 | -2.524008 |  |
| 14915 | Laser | CREG2        | 0.000021 | -2.493    |  |
| 14916 | Laser | EGFR         | 0        | -2.492946 |  |
| 14917 | Laser | CA11         | 0.000014 | -2.46209  |  |
| 14918 | Laser | TFDP2        | 0.000001 | -2.461942 |  |
| 14919 | Laser | LIAS         | 0.000003 | -2.461932 |  |
| 14920 | Laser | TMEM86B      | 0.00003  | -2.428842 |  |
| 14921 | Laser | CSTF1        | 0        | -2.400523 |  |
| 14922 | Laser | CNNM3        | 0        | -2.38134  |  |
| 14923 | Laser | RHBG         | 0.000005 | -2.367879 |  |
| 14924 | Laser | SCAND1       | 0.000014 | -2.364232 |  |
| 14925 | Laser | TFAM         | 0.000022 | -2.359157 |  |
| 14926 | Laser | MEF2A        | 0.000007 | -2.353104 |  |
| 14927 | Laser | MBIP         | 0.000033 | -2.351988 |  |
| 14928 | Laser | TMEM18       | 0.000005 | -2.334022 |  |
| 14929 | Laser | FAM184B      | 0.000006 | -2.318637 |  |
| 14930 | Laser | CDKN2AIPNL   | 0        | -2.31011  |  |
| 14931 | Laser | ANKHD1       | 0.000012 | -2.308774 |  |
| 14932 | Laser | DHDPSL       | 0.000001 | -2.302446 |  |
| 14933 | Laser | MRPL21       | 0.000015 | -2.266093 |  |
| 14934 | Laser | ZNF236       | 0.000002 | -2.255423 |  |
| 14935 | Laser | LOC284804    | 0.000015 | -2.246998 |  |
| 14936 | Laser | PHF15        | 0.000022 | -2.243242 |  |
| 14937 | Laser | RAB6B        | 0        | -2.217003 |  |
| 14938 | Laser | RYR1         | 0.00003  | -2.213525 |  |
| 14939 | Laser | RDM1         | 0.000003 | -2.209673 |  |
| 14940 | Laser | HOXC13       | 0.000001 | -2.203482 |  |
| 14941 | Laser | ACVR2B       | 0.000013 | -2.200262 |  |
| 14942 | Laser | LOC100128988 | 0        | -2.190348 |  |
| 14943 | Laser | GLS2         | 0.000003 | -2.182317 |  |
| 14944 | Laser | NEURL2       | 0.000001 | -2.170779 |  |
| 14945 | Laser | GNAL         | 0.00001  | -2.164026 |  |
| 14946 | Laser | ARHGEF26     | 0.000015 | -2.154755 |  |
| 14947 | Laser | LOC285074    | 0.000028 | -2.150647 |  |
| 14948 | Laser | KLHL24       | 0.000005 | -2.138031 |  |

|       |       |           |          |           |  |
|-------|-------|-----------|----------|-----------|--|
| 14949 | Laser | SLC2A4RG  | 0.00001  | -2.127678 |  |
| 14950 | Laser | STRN3     | 0.000034 | -2.114436 |  |
| 14951 | Laser | SOHLH1    | 0.000024 | -2.108161 |  |
| 14952 | Laser | RXRA      | 0.000006 | -2.098693 |  |
| 14953 | Laser | LOC401233 | 0.000011 | -2.08761  |  |
| 14954 | Laser | SUSD4     | 0.000034 | -2.086744 |  |
| 14955 | Laser | TMPRSS6   | 0.000001 | -2.066939 |  |
| 14956 | Laser | ANKRD16   | 0.000001 | -2.064732 |  |
| 14957 | Laser | DENND5B   | 0.00001  | -2.0426   |  |
| 14958 | Laser | OSBPL10   | 0        | -2.034479 |  |
| 14959 | Laser | SRSF5     | 0.00003  | -2.033889 |  |
| 14960 | Laser | FOXRED2   | 0.000014 | -2.027633 |  |
| 14961 | Laser | ZNF614    | 0        | -2.024856 |  |
| 14962 | Laser | LOC148709 | 0        | -2.004196 |  |
| 14963 | Laser | MYO10     | 0        | 2.018429  |  |
| 14964 | Laser | CSNK1G1   | 0.000011 | 2.025083  |  |
| 14965 | Laser | S100PBP   | 0.00001  | 2.034711  |  |
| 14966 | Laser | SMAD2     | 0.000009 | 2.037005  |  |
| 14967 | Laser | ZNF438    | 0        | 2.049256  |  |
| 14968 | Laser | ADAMTS10  | 0.000003 | 2.065817  |  |
| 14969 | Laser | C14orf28  | 0.000004 | 2.06638   |  |
| 14970 | Laser | AMMECR1   | 0.000003 | 2.083943  |  |
| 14971 | Laser | GIPC1     | 0.000001 | 2.091423  |  |
| 14972 | Laser | UBQLN1    | 0.000027 | 2.102148  |  |
| 14973 | Laser | NRBP2     | 0.000035 | 2.108685  |  |
| 14974 | Laser | TCF25     | 0        | 2.109447  |  |
| 14975 | Laser | C15orf29  | 0.000029 | 2.116129  |  |
| 14976 | Laser | BTBD7     | 0.000002 | 2.126973  |  |
| 14977 | Laser | RWDD4     | 0.000003 | 2.134226  |  |
| 14978 | Laser | CD47      | 0.000001 | 2.140598  |  |
| 14979 | Laser | CUX1      | 0.000001 | 2.151     |  |
| 14980 | Laser | LPP       | 0        | 2.152973  |  |
| 14981 | Laser | GSPT1     | 0.000016 | 2.160143  |  |
| 14982 | Laser | SSBP3     | 0.000006 | 2.172406  |  |
| 14983 | Laser | 2-Sep     | 0        | 2.191851  |  |
| 14984 | Laser | UHRF2     | 0.000007 | 2.214981  |  |
| 14985 | Laser | RPL37A    | 0.000029 | 2.225608  |  |
| 14986 | Laser | PTMA      | 0.000006 | 2.237295  |  |
| 14987 | Laser | FAM120A   | 0        | 2.238424  |  |
| 14988 | Laser | ZMPSTE24  | 0        | 2.277996  |  |
| 14989 | Laser | CDK5RAP2  | 0.000001 | 2.302563  |  |
| 14990 | Laser | TMEM181   | 0        | 2.31098   |  |
| 14991 | Laser | CCDC149   | 0.000025 | 2.335143  |  |
| 14992 | Laser | SAMD9     | 0.000038 | 2.341064  |  |
| 14993 | Laser | TIMM17A   | 0        | 2.342172  |  |
| 14994 | Laser | MBD1      | 0        | 2.350612  |  |
| 14995 | Laser | RFK       | 0.000001 | 2.368699  |  |
| 14996 | Laser | FAM41C    | 0        | 2.380954  |  |
| 14997 | Laser | SPCS3     | 0        | 2.421203  |  |
| 14998 | Laser | MBD2      | 0.000011 | 2.43081   |  |

|       |       |           |          |           |  |
|-------|-------|-----------|----------|-----------|--|
| 14999 | Laser | TRIM38    | 0.000023 | 2.432439  |  |
| 15000 | Laser | FIG4      | 0.00001  | 2.443047  |  |
| 15001 | Laser | GNAQ      | 0        | 2.501042  |  |
| 15002 | Laser | CTTNBP2NL | 0        | 2.578636  |  |
| 15003 | Laser | MYCBP2    | 0.00001  | 2.602477  |  |
| 15004 | Laser | IQGAP1    | 0.000001 | 2.669913  |  |
| 15005 | Laser | GPATCH4   | 0.000035 | 2.727949  |  |
| 15006 | Laser | PIK3C3    | 0        | 2.751652  |  |
| 15007 | Laser | ODF3B     | 0.000002 | 2.781268  |  |
| 15008 | Laser | LRRFIP1   | 0        | 2.782054  |  |
| 15009 | Laser | ANAPC4    | 0.000007 | 3.098416  |  |
| 15010 | Laser | AK3       | 0.000002 | 3.181674  |  |
| 15011 | Laser | VPS13B    | 0.000002 | 3.262962  |  |
| 15012 | Laser | ZDHHC21   | 0.000017 | 3.335738  |  |
| 15013 | Laser | BTN3A3    | 0.00002  | 3.360597  |  |
| 15014 | Laser | IKBKB     | 0.000001 | 3.370782  |  |
| 15015 | Laser | PTAR1     | 0.000001 | 3.396673  |  |
| 15016 | Laser | RABGAP1L  | 0.000011 | 3.401429  |  |
| 15017 | Laser | CRYBG3    | 0.000006 | 3.434472  |  |
| 15018 | Laser | ZBTB20    | 0        | 3.657749  |  |
| 15019 | Laser | RUNX1     | 0.000012 | 3.671123  |  |
| 15020 | Laser | TAP1      | 0.00003  | 3.697397  |  |
| 15021 | Laser | GALNT1    | 0.000013 | 3.774027  |  |
| 15022 | Laser | RAC2      | 0.000003 | 3.96965   |  |
| 15023 | Laser | ZDHHC2    | 0.000039 | 4.599631  |  |
| 15024 | Laser | HRH1      | 0.000001 | 4.733727  |  |
| 15025 | Laser | LYST      | 0.000005 | 4.875052  |  |
| 15026 | Laser | AHI1      | 0        | 4.9331    |  |
| 15027 | Laser | NAV2      | 0.000001 | 5.226256  |  |
| 15028 | Laser | TUSC1     | 0        | 5.406527  |  |
| 15029 | Laser | ZNF420    | 0.000038 | 5.43613   |  |
| 15030 | Laser | PSD3      | 0        | 5.751878  |  |
| 15031 | Laser | OXCT1     | 0.000013 | 5.786947  |  |
| 15032 | Laser | CADPS2    | 0.00003  | 5.823734  |  |
| 15033 | Laser | SPATA18   | 0.000015 | 6.297241  |  |
| 15034 | Laser | C3orf70   | 0.000001 | 6.970345  |  |
| 15035 | Laser | RCBTB2    | 0        | 7.4307    |  |
| 15036 | Laser | NIPAL2    | 0.000028 | 7.781628  |  |
| 15037 | Laser | ETS1      | 0.000003 | 8.555891  |  |
| 15038 | Laser | SEMA5A    | 0        | 9.239055  |  |
| 15039 | Laser | CELF2     | 0        | 9.856363  |  |
| 15040 | Laser | PHF11     | 0.000001 | 10.230079 |  |
| 15041 | Laser | STAMBPL1  | 0.000001 | 11.488363 |  |
| 15042 | Laser | NFIB      | 0.000001 | 11.57896  |  |
| 15043 | Laser | FAS       | 0.000001 | 15.020867 |  |
| 15044 | Laser | LXN       | 0.00003  | 15.84873  |  |
| 15045 | Laser | PRKACB    | 0        | 16.586677 |  |
| 15046 | Laser | ALCAM     | 0.000005 | 17.210558 |  |
| 15047 | Laser | RNF135    | 0.000003 | 18.253457 |  |
| 15048 | Laser | HLA-DPA1  | 0.000028 | 21.293448 |  |



|       |                 |             |          |            |  |
|-------|-----------------|-------------|----------|------------|--|
| 15049 | Laser           | COL3A1      | 0.000011 | 137.452893 |  |
| 15050 | Liver neoplasms | CLCA1       | 0        | -37.400519 |  |
| 15051 | Liver neoplasms | SLC26A3     | 0        | -23.603974 |  |
| 15052 | Liver neoplasms | IGHA1       | 0        | -11.899987 |  |
| 15053 | Liver neoplasms | C9orf23     | 0        | -10.808603 |  |
| 15054 | Liver neoplasms | GCG         | 0        | -10.543371 |  |
| 15055 | Liver neoplasms | GTF2B       | 0        | -9.59045   |  |
| 15056 | Liver neoplasms | ENAM        | 0        | -8.013751  |  |
| 15057 | Liver neoplasms | CEACAM7     | 0        | -7.413905  |  |
| 15058 | Liver neoplasms | PIGR        | 0        | -6.867776  |  |
| 15059 | Liver neoplasms | CXCL14      | 0        | -6.657576  |  |
| 15060 | Liver neoplasms | IGHG1       | 0        | -6.475037  |  |
| 15061 | Liver neoplasms | NR4A2       | 0        | -6.116631  |  |
| 15062 | Liver neoplasms | TSPAN1      | 0        | -6.014172  |  |
| 15063 | Liver neoplasms | ADAMDEC1    | 0        | -5.9163    |  |
| 15064 | Liver neoplasms | C10orf99    | 0        | -5.869133  |  |
| 15065 | Liver neoplasms | PYCR2       | 0.000009 | -5.73518   |  |
| 15066 | Liver neoplasms | HLA-C       | 0        | -5.56222   |  |
| 15067 | Liver neoplasms | IGLL1       | 0        | -4.856665  |  |
| 15068 | Liver neoplasms | CCL11       | 0        | -4.849366  |  |
| 15069 | Liver neoplasms | PLA2G2A     | 0        | -4.651739  |  |
| 15070 | Liver neoplasms | MUC2        | 0        | -4.417867  |  |
| 15071 | Liver neoplasms | LRRC19      | 0.000002 | -4.283599  |  |
| 15072 | Liver neoplasms | PADI2       | 0        | -4.153545  |  |
| 15073 | Liver neoplasms | DHRS9       | 0        | -4.146086  |  |
| 15074 | Liver neoplasms | REP15       | 0        | -4.133384  |  |
| 15075 | Liver neoplasms | IGL@        | 0        | -4.09573   |  |
| 15076 | Liver neoplasms | SPON1       | 0        | -3.80835   |  |
| 15077 | Liver neoplasms | KLF4        | 0        | -3.65689   |  |
| 15078 | Liver neoplasms | FN3K        | 0        | -3.598249  |  |
| 15079 | Liver neoplasms | HSD11B2     | 0        | -3.543672  |  |
| 15080 | Liver neoplasms | MALT1       | 0        | -3.532754  |  |
| 15081 | Liver neoplasms | TFF3        | 0.000007 | -3.525928  |  |
| 15082 | Liver neoplasms | FXYD3       | 0.000009 | -3.353044  |  |
| 15083 | Liver neoplasms | DKFZP564O08 | 0        | -3.231508  |  |
| 15084 | Liver neoplasms | C12orf32    | 0        | -3.185808  |  |
| 15085 | Liver neoplasms | MEP1A       | 0.000011 | -3.079247  |  |
| 15086 | Liver neoplasms | PIM2        | 0        | -2.977715  |  |
| 15087 | Liver neoplasms | FAM44B      | 0        | -2.849228  |  |
| 15088 | Liver neoplasms | RABL5       | 0        | -2.830244  |  |
| 15089 | Liver neoplasms | PDGFRA      | 0.000009 | -2.820959  |  |
| 15090 | Liver neoplasms | COLQ        | 0.000012 | -2.787527  |  |
| 15091 | Liver neoplasms | CPA3        | 0        | -2.742683  |  |
| 15092 | Liver neoplasms | FRZB        | 0        | -2.731391  |  |
| 15093 | Liver neoplasms | MYLK        | 0        | -2.727469  |  |
| 15094 | Liver neoplasms | PTGER4      | 0        | -2.681329  |  |
| 15095 | Liver neoplasms | TNFRSF17    | 0        | -2.654046  |  |
| 15096 | Liver neoplasms | FLJ21511    | 0        | -2.626738  |  |
| 15097 | Liver neoplasms | RIPK1       | 0.000008 | -2.600399  |  |
| 15098 | Liver neoplasms | MUC4        | 0        | -2.546818  |  |

|       |                             |            |          |           |  |
|-------|-----------------------------|------------|----------|-----------|--|
| 15099 | Liver neoplasms             | SELENBP1   | 0.000002 | -2.546401 |  |
| 15100 | Liver neoplasms             | IGLV6-57   | 0        | -2.543077 |  |
| 15101 | Liver neoplasms             | CTSK       | 0        | -2.504462 |  |
| 15102 | Liver neoplasms             | GSN        | 0        | -2.48907  |  |
| 15103 | Liver neoplasms             | CD79A      | 0        | -2.488098 |  |
| 15104 | Liver neoplasms             | FGF7       | 0        | -2.340139 |  |
| 15105 | Liver neoplasms             | BDKRB2     | 0        | -2.338755 |  |
| 15106 | Liver neoplasms             | PARP10     | 0        | -2.316422 |  |
| 15107 | Liver neoplasms             | ETHE1      | 0        | -2.311634 |  |
| 15108 | Liver neoplasms             | DSCR1L1    | 0.000004 | -2.302937 |  |
| 15109 | Liver neoplasms             | SCNN1A     | 0.000011 | -2.280739 |  |
| 15110 | Liver neoplasms             | GOLPH2     | 0.000001 | -2.261735 |  |
| 15111 | Liver neoplasms             | IL1R2      | 0        | -2.230464 |  |
| 15112 | Liver neoplasms             | ST6GALNAC6 | 0        | -2.21554  |  |
| 15113 | Liver neoplasms             | LOH11CR2A  | 0        | -2.173129 |  |
| 15114 | Liver neoplasms             | MYL9       | 0.000002 | -2.120174 |  |
| 15115 | Liver neoplasms             | KCNMB1     | 0        | -2.109556 |  |
| 15116 | Liver neoplasms             | POU2AF1    | 0        | -2.093548 |  |
| 15117 | Liver neoplasms             | CNN1       | 0.000009 | -2.089465 |  |
| 15118 | Liver neoplasms             | TPSAB1     | 0        | -2.074847 |  |
| 15119 | Liver neoplasms             | SIAE       | 0        | -2.056617 |  |
| 15120 | Liver neoplasms             | FRYL       | 0.000001 | -2.048906 |  |
| 15121 | Liver neoplasms             | FKBP1A     | 0        | -2.028103 |  |
| 15122 | Liver neoplasms             | TIMP1      | 0.000006 | 2.422773  |  |
| 15123 | Liver neoplasms             | ADFP       | 0.000005 | 3.308015  |  |
| 15124 | Liver neoplasms             | TGM4       | 0.000011 | 3.756878  |  |
| 15125 | Liver neoplasms             | CFB        | 0.000004 | 4.800839  |  |
| 15126 | Liver neoplasms             | AGT        | 0.000002 | 6.2148    |  |
| 15127 | Liver neoplasms             | PAH        | 0.000007 | 6.401863  |  |
| 15128 | Liver neoplasms             | APOA2      | 0.000003 | 7.224515  |  |
| 15129 | Liver neoplasms             | CFHR1      | 0.000011 | 7.42292   |  |
| 15130 | Liver neoplasms             | C4BPA      | 0.000003 | 7.579072  |  |
| 15131 | Liver neoplasms             | FMO3       | 0.000001 | 7.948161  |  |
| 15132 | Liver neoplasms             | ALDOB      | 0        | 8.445676  |  |
| 15133 | Liver neoplasms             | GC         | 0        | 8.682619  |  |
| 15134 | Liver neoplasms             | TOMM40     | 0        | 9.333405  |  |
| 15135 | Liver neoplasms             | AQP3       | 0        | 10.798013 |  |
| 15136 | Liver neoplasms             | TTR        | 0.000001 | 11.607525 |  |
| 15137 | Liver neoplasms             | PLG        | 0        | 11.915053 |  |
| 15138 | Liver neoplasms             | SAA2       | 0        | 12.00583  |  |
| 15139 | Liver neoplasms             | TF         | 0        | 14.54572  |  |
| 15140 | Malignant neoplasm of ovary | CGI-38     | 0.003991 | -2.78059  |  |
| 15141 | Malignant neoplasm of ovary | SETBP1     | 0.006355 | -2.081398 |  |
| 15142 | Malignant neoplasm of ovary | SDK1       | 0.003991 | 2.026087  |  |
| 15143 | Malignant neoplasm of ovary | MS4A4A     | 0.010815 | 2.180689  |  |
| 15144 | Malignant neoplasm of ovary | ARL4A      | 0.027133 | 2.30044   |  |
| 15145 | Malignant neoplasm of ovary | ST3GAL2    | 0.000845 | 2.361099  |  |
| 15146 | Malignant neoplasm of ovary | TAP2       | 0.020351 | 2.516374  |  |
| 15147 | Malignant neoplasm of ovary | LOC440607  | 0.044929 | 2.670231  |  |
| 15148 | Malignant neoplasm of ovary | SAMD9      | 0.035369 | 2.792032  |  |

|       |                                |              |          |             |  |
|-------|--------------------------------|--------------|----------|-------------|--|
| 15149 | Malignant neoplasm of ovary    | IFI44        | 0.020351 | 3.348431    |  |
| 15150 | Malignant neoplasm of ovary    | CLEC4D       | 0.027133 | 3.620512    |  |
| 15151 | Malignant neoplasm of ovary    | MGC10233     | 0.031326 | 3.995307    |  |
| 15152 | Malignant neoplasm of prostate | SMCY         | 0.040675 | 6.353116    |  |
| 15153 | Malignant neoplasm of prostate | RPS4Y2       | 0.039175 | 13.187671   |  |
| 15154 | Malignant neoplasm of prostate | RPS4Y1       | 0.039175 | 56.699911   |  |
| 15155 | Malignant neoplasm of thyroid  | TPST2        | 0.000258 | 2.332694    |  |
| 15156 | Malignant Neoplasms            | EEF1D        | 0        | -699.889116 |  |
| 15157 | Malignant Neoplasms            | EIF4A1       | 0        | -684.841838 |  |
| 15158 | Malignant Neoplasms            | SUB1         | 0        | -581.649816 |  |
| 15159 | Malignant Neoplasms            | YWHAQ        | 0        | -570.316395 |  |
| 15160 | Malignant Neoplasms            | ZC3H11A      | 0        | -525.045515 |  |
| 15161 | Malignant Neoplasms            | EIF3E        | 0        | -503.11703  |  |
| 15162 | Malignant Neoplasms            | SRSF3        | 0        | -473.877715 |  |
| 15163 | Malignant Neoplasms            | PFDN5        | 0        | -466.742321 |  |
| 15164 | Malignant Neoplasms            | HSP90AB1     | 0        | -439.562879 |  |
| 15165 | Malignant Neoplasms            | SMNDC1       | 0        | -355.774331 |  |
| 15166 | Malignant Neoplasms            | PSMB1        | 0        | -330.393137 |  |
| 15167 | Malignant Neoplasms            | MPRIIP       | 0        | -322.778333 |  |
| 15168 | Malignant Neoplasms            | SLC2A3       | 0.000047 | -313.137976 |  |
| 15169 | Malignant Neoplasms            | TRMT112      | 0        | -270.472615 |  |
| 15170 | Malignant Neoplasms            | APCDD1       | 0.000233 | -263.329122 |  |
| 15171 | Malignant Neoplasms            | DNAJB6       | 0        | -256.868942 |  |
| 15172 | Malignant Neoplasms            | C19orf43     | 0        | -244.243227 |  |
| 15173 | Malignant Neoplasms            | MYEOV2       | 0        | -240.63904  |  |
| 15174 | Malignant Neoplasms            | PSMB6        | 0        | -235.554357 |  |
| 15175 | Malignant Neoplasms            | LOC100506727 | 0        | -229.540048 |  |
| 15176 | Malignant Neoplasms            | DYNC1LI2     | 0        | -229.119824 |  |
| 15177 | Malignant Neoplasms            | ZNF410       | 0        | -211.529045 |  |
| 15178 | Malignant Neoplasms            | MZT2B        | 0        | -209.966747 |  |
| 15179 | Malignant Neoplasms            | YTHDC1       | 0        | -202.676108 |  |
| 15180 | Malignant Neoplasms            | JAK1         | 0        | -202.082868 |  |
| 15181 | Malignant Neoplasms            | ATP6V1F      | 0        | -200.97053  |  |
| 15182 | Malignant Neoplasms            | EIF1         | 0        | -199.160288 |  |
| 15183 | Malignant Neoplasms            | MZT2A        | 0        | -199.159894 |  |
| 15184 | Malignant Neoplasms            | CSNK1A1      | 0        | -194.191192 |  |
| 15185 | Malignant Neoplasms            | UBXN6        | 0        | -192.129411 |  |
| 15186 | Malignant Neoplasms            | ISCU         | 0        | -190.072363 |  |
| 15187 | Malignant Neoplasms            | BUD31        | 0        | -188.93846  |  |
| 15188 | Malignant Neoplasms            | PTMA         | 0        | -186.499335 |  |
| 15189 | Malignant Neoplasms            | C3orf10      | 0        | -183.60437  |  |
| 15190 | Malignant Neoplasms            | POLR2L       | 0        | -181.373259 |  |
| 15191 | Malignant Neoplasms            | DDX3X        | 0        | -179.635009 |  |
| 15192 | Malignant Neoplasms            | TBCB         | 0        | -172.307453 |  |
| 15193 | Malignant Neoplasms            | CFLAR        | 0        | -170.967163 |  |
| 15194 | Malignant Neoplasms            | ACLY         | 0        | -170.716949 |  |
| 15195 | Malignant Neoplasms            | MCL1         | 0        | -161.393914 |  |
| 15196 | Malignant Neoplasms            | SRRM1        | 0        | -159.82399  |  |
| 15197 | Malignant Neoplasms            | PRICKLE4     | 0        | -158.754106 |  |
| 15198 | Malignant Neoplasms            | REEP5        | 0        | -157.942777 |  |

|       |                     |             |          |             |  |
|-------|---------------------|-------------|----------|-------------|--|
| 15199 | Malignant Neoplasms | DYNLRB1     | 0        | -157.800676 |  |
| 15200 | Malignant Neoplasms | HNRNPC      | 0        | -156.272469 |  |
| 15201 | Malignant Neoplasms | CNOT2       | 0        | -156.005853 |  |
| 15202 | Malignant Neoplasms | NPIP        | 0        | -155.421505 |  |
| 15203 | Malignant Neoplasms | TGFBR2      | 0        | -153.220942 |  |
| 15204 | Malignant Neoplasms | BTG3        | 0        | -149.838851 |  |
| 15205 | Malignant Neoplasms | ELOVL5      | 0.000647 | -148.528674 |  |
| 15206 | Malignant Neoplasms | RBPJ        | 0        | -146.705048 |  |
| 15207 | Malignant Neoplasms | MRPS10      | 0        | -145.332824 |  |
| 15208 | Malignant Neoplasms | EIF2S2      | 0        | -143.618265 |  |
| 15209 | Malignant Neoplasms | CIAPIN1     | 0        | -143.238303 |  |
| 15210 | Malignant Neoplasms | SPCS3       | 0        | -141.698023 |  |
| 15211 | Malignant Neoplasms | MLL2        | 0        | -141.444741 |  |
| 15212 | Malignant Neoplasms | HNRNPH1     | 0        | -139.54796  |  |
| 15213 | Malignant Neoplasms | RSL24D1     | 0        | -136.723139 |  |
| 15214 | Malignant Neoplasms | SEC62       | 0        | -136.128219 |  |
| 15215 | Malignant Neoplasms | NGFRAP1     | 0.000085 | -135.816614 |  |
| 15216 | Malignant Neoplasms | ZFAND5      | 0        | -135.27416  |  |
| 15217 | Malignant Neoplasms | C1orf52     | 0        | -135.128515 |  |
| 15218 | Malignant Neoplasms | TMEM47      | 0.000084 | -134.314673 |  |
| 15219 | Malignant Neoplasms | KRT5        | 0.000647 | -131.072004 |  |
| 15220 | Malignant Neoplasms | HK1         | 0        | -130.921963 |  |
| 15221 | Malignant Neoplasms | LOC220906   | 0        | -129.519923 |  |
| 15222 | Malignant Neoplasms | WAC         | 0        | -129.473693 |  |
| 15223 | Malignant Neoplasms | RBP1        | 0.000196 | -125.448288 |  |
| 15224 | Malignant Neoplasms | CNKSR3      | 0.000316 | -124.830849 |  |
| 15225 | Malignant Neoplasms | COMMD6      | 0        | -124.577367 |  |
| 15226 | Malignant Neoplasms | MYST3       | 0        | -122.384709 |  |
| 15227 | Malignant Neoplasms | H3F3B       | 0        | -120.314174 |  |
| 15228 | Malignant Neoplasms | MACF1       | 0        | -119.418087 |  |
| 15229 | Malignant Neoplasms | C14orf4     | 0        | -119.038609 |  |
| 15230 | Malignant Neoplasms | ATP6V1G2    | 0        | -118.084678 |  |
| 15231 | Malignant Neoplasms | PSMB4       | 0        | -117.57619  |  |
| 15232 | Malignant Neoplasms | MSL1        | 0        | -117.483846 |  |
| 15233 | Malignant Neoplasms | WTAP        | 0        | -116.752754 |  |
| 15234 | Malignant Neoplasms | SRRM2       | 0        | -116.658515 |  |
| 15235 | Malignant Neoplasms | RNF13       | 0        | -115.277865 |  |
| 15236 | Malignant Neoplasms | RNASEH1     | 0        | -114.769009 |  |
| 15237 | Malignant Neoplasms | SLC2A14     | 0.000351 | -114.078426 |  |
| 15238 | Malignant Neoplasms | PSME4       | 0        | -113.821707 |  |
| 15239 | Malignant Neoplasms | SETD5       | 0        | -113.745575 |  |
| 15240 | Malignant Neoplasms | SCAND1      | 0        | -113.527401 |  |
| 15241 | Malignant Neoplasms | SETD2       | 0        | -113.230505 |  |
| 15242 | Malignant Neoplasms | NEDD8       | 0        | -112.20158  |  |
| 15243 | Malignant Neoplasms | TMEM189-UB1 | 0        | -111.605109 |  |
| 15244 | Malignant Neoplasms | C4orf3      | 0        | -110.813019 |  |
| 15245 | Malignant Neoplasms | UBE3A       | 0        | -108.416905 |  |
| 15246 | Malignant Neoplasms | ADD1        | 0        | -107.933573 |  |
| 15247 | Malignant Neoplasms | BRD3        | 0        | -107.645846 |  |
| 15248 | Malignant Neoplasms | POM121      | 0        | -105.420051 |  |

|       |                     |          |          |             |  |
|-------|---------------------|----------|----------|-------------|--|
| 15249 | Malignant Neoplasms | PICALM   | 0        | -102.678326 |  |
| 15250 | Malignant Neoplasms | MRPL20   | 0        | -101.125345 |  |
| 15251 | Malignant Neoplasms | DUSP6    | 0        | -101.122739 |  |
| 15252 | Malignant Neoplasms | RBM5     | 0        | -100.742038 |  |
| 15253 | Malignant Neoplasms | FAM120B  | 0.000075 | -100.720277 |  |
| 15254 | Malignant Neoplasms | DCTD     | 0        | -100.18793  |  |
| 15255 | Malignant Neoplasms | PSMD4    | 0        | -98.660851  |  |
| 15256 | Malignant Neoplasms | SLC35E1  | 0        | -97.57434   |  |
| 15257 | Malignant Neoplasms | C11orf58 | 0        | -97.433569  |  |
| 15258 | Malignant Neoplasms | MEAF6    | 0        | -97.309396  |  |
| 15259 | Malignant Neoplasms | SYNCRIP  | 0        | -96.992912  |  |
| 15260 | Malignant Neoplasms | UBP1     | 0        | -94.265215  |  |
| 15261 | Malignant Neoplasms | AFF4     | 0        | -93.762331  |  |
| 15262 | Malignant Neoplasms | ARHGAP1  | 0        | -93.423106  |  |
| 15263 | Malignant Neoplasms | RAD23A   | 0        | -93.06712   |  |
| 15264 | Malignant Neoplasms | MID1     | 0.000445 | -92.787503  |  |
| 15265 | Malignant Neoplasms | NFATC2IP | 0        | -91.7713    |  |
| 15266 | Malignant Neoplasms | PTPN11   | 0        | -90.719416  |  |
| 15267 | Malignant Neoplasms | MGAT1    | 0        | -88.827949  |  |
| 15268 | Malignant Neoplasms | MSX1     | 0.000572 | -88.746168  |  |
| 15269 | Malignant Neoplasms | BRD4     | 0        | -88.051181  |  |
| 15270 | Malignant Neoplasms | HERC1    | 0        | -86.752432  |  |
| 15271 | Malignant Neoplasms | CHMP4A   | 0        | -86.578022  |  |
| 15272 | Malignant Neoplasms | PHC3     | 0        | -85.398545  |  |
| 15273 | Malignant Neoplasms | DNAJC2   | 0        | -85.096815  |  |
| 15274 | Malignant Neoplasms | PARL     | 0        | -84.900526  |  |
| 15275 | Malignant Neoplasms | RDBP     | 0        | -83.966271  |  |
| 15276 | Malignant Neoplasms | SERINC3  | 0        | -82.012606  |  |
| 15277 | Malignant Neoplasms | SIK3     | 0        | -81.755965  |  |
| 15278 | Malignant Neoplasms | RABGAP1  | 0        | -81.645394  |  |
| 15279 | Malignant Neoplasms | ZNRD1    | 0        | -81.423108  |  |
| 15280 | Malignant Neoplasms | VIM      | 0.000244 | -81.143008  |  |
| 15281 | Malignant Neoplasms | DIMT1L   | 0        | -81.117746  |  |
| 15282 | Malignant Neoplasms | CTSB     | 0        | -80.751663  |  |
| 15283 | Malignant Neoplasms | EPDR1    | 0.000647 | -79.341374  |  |
| 15284 | Malignant Neoplasms | CCNL1    | 0        | -77.954632  |  |
| 15285 | Malignant Neoplasms | PRF1     | 0.000647 | -77.850672  |  |
| 15286 | Malignant Neoplasms | KPNA4    | 0        | -77.504852  |  |
| 15287 | Malignant Neoplasms | HSP90AA1 | 0        | -77.038638  |  |
| 15288 | Malignant Neoplasms | RABGGTB  | 0        | -75.150883  |  |
| 15289 | Malignant Neoplasms | ANKRD10  | 0        | -75.079577  |  |
| 15290 | Malignant Neoplasms | 9-Sep    | 0        | -74.975623  |  |
| 15291 | Malignant Neoplasms | GYG1     | 0        | -74.679465  |  |
| 15292 | Malignant Neoplasms | CORO1C   | 0        | -74.629684  |  |
| 15293 | Malignant Neoplasms | 7-Sep    | 0        | -74.404495  |  |
| 15294 | Malignant Neoplasms | STUB1    | 0        | -74.062889  |  |
| 15295 | Malignant Neoplasms | ATRX     | 0        | -73.382766  |  |
| 15296 | Malignant Neoplasms | SOAT1    | 0        | -72.919006  |  |
| 15297 | Malignant Neoplasms | WBSCR22  | 0        | -71.417114  |  |
| 15298 | Malignant Neoplasms | PEA15    | 0        | -71.00403   |  |

|       |                     |          |          |            |  |
|-------|---------------------|----------|----------|------------|--|
| 15299 | Malignant Neoplasms | PEBP1    | 0        | -69.881828 |  |
| 15300 | Malignant Neoplasms | UTP11L   | 0        | -68.102018 |  |
| 15301 | Malignant Neoplasms | KCTD20   | 0        | -68.072448 |  |
| 15302 | Malignant Neoplasms | WASF3    | 0.000458 | -67.506757 |  |
| 15303 | Malignant Neoplasms | PHF2     | 0        | -67.473383 |  |
| 15304 | Malignant Neoplasms | LUC7L2   | 0        | -67.038861 |  |
| 15305 | Malignant Neoplasms | ABL1     | 0        | -66.809892 |  |
| 15306 | Malignant Neoplasms | GATAD2A  | 0        | -66.178048 |  |
| 15307 | Malignant Neoplasms | LYRM1    | 0        | -65.524952 |  |
| 15308 | Malignant Neoplasms | MESDC1   | 0        | -65.136486 |  |
| 15309 | Malignant Neoplasms | INO80C   | 0        | -64.323668 |  |
| 15310 | Malignant Neoplasms | CST1     | 0.000284 | -63.462269 |  |
| 15311 | Malignant Neoplasms | ABAT     | 0.000333 | -63.352896 |  |
| 15312 | Malignant Neoplasms | PTOV1    | 0        | -62.830318 |  |
| 15313 | Malignant Neoplasms | GNL3     | 0        | -62.696975 |  |
| 15314 | Malignant Neoplasms | TDG      | 0        | -62.606778 |  |
| 15315 | Malignant Neoplasms | DDX10    | 0        | -62.26356  |  |
| 15316 | Malignant Neoplasms | IGFBP3   | 0.000244 | -62.153712 |  |
| 15317 | Malignant Neoplasms | RBFOX2   | 0        | -61.832666 |  |
| 15318 | Malignant Neoplasms | C2orf69  | 0        | -61.637564 |  |
| 15319 | Malignant Neoplasms | C19orf70 | 0        | -61.27213  |  |
| 15320 | Malignant Neoplasms | HIPK3    | 0        | -60.905003 |  |
| 15321 | Malignant Neoplasms | TUBGCP2  | 0        | -60.316121 |  |
| 15322 | Malignant Neoplasms | MUC4     | 0.001993 | -60.311531 |  |
| 15323 | Malignant Neoplasms | SMC5     | 0        | -60.104897 |  |
| 15324 | Malignant Neoplasms | MUC2     | 0.001405 | -60.058351 |  |
| 15325 | Malignant Neoplasms | DPM1     | 0        | -59.475498 |  |
| 15326 | Malignant Neoplasms | WASH3P   | 0        | -59.124112 |  |
| 15327 | Malignant Neoplasms | TCEAL3   | 0        | -58.771225 |  |
| 15328 | Malignant Neoplasms | NME4     | 0        | -58.535729 |  |
| 15329 | Malignant Neoplasms | CADPS2   | 0.000355 | -58.269955 |  |
| 15330 | Malignant Neoplasms | DSE      | 0        | -57.530285 |  |
| 15331 | Malignant Neoplasms | GAL      | 0.000686 | -57.026708 |  |
| 15332 | Malignant Neoplasms | GAPVD1   | 0        | -56.718241 |  |
| 15333 | Malignant Neoplasms | PEF1     | 0        | -56.575719 |  |
| 15334 | Malignant Neoplasms | PITPNB   | 0        | -56.567139 |  |
| 15335 | Malignant Neoplasms | DTNBP1   | 0        | -56.142809 |  |
| 15336 | Malignant Neoplasms | OGT      | 0        | -55.316082 |  |
| 15337 | Malignant Neoplasms | ARPP19   | 0        | -55.135499 |  |
| 15338 | Malignant Neoplasms | NOP2     | 0        | -54.37258  |  |
| 15339 | Malignant Neoplasms | FAM38A   | 0        | -54.307464 |  |
| 15340 | Malignant Neoplasms | MCM3AP   | 0        | -54.062299 |  |
| 15341 | Malignant Neoplasms | HIPK2    | 0.000291 | -53.636186 |  |
| 15342 | Malignant Neoplasms | MAP3K4   | 0        | -53.438254 |  |
| 15343 | Malignant Neoplasms | SYNJ2    | 0        | -53.419968 |  |
| 15344 | Malignant Neoplasms | RALGDS   | 0        | -53.395158 |  |
| 15345 | Malignant Neoplasms | EIF1B    | 0        | -53.285117 |  |
| 15346 | Malignant Neoplasms | ETF1     | 0        | -52.741184 |  |
| 15347 | Malignant Neoplasms | AAK1     | 0        | -52.387023 |  |
| 15348 | Malignant Neoplasms | WSB1     | 0        | -52.153317 |  |

|       |                     |          |          |            |  |
|-------|---------------------|----------|----------|------------|--|
| 15349 | Malignant Neoplasms | ITPA     | 0        | -52.109892 |  |
| 15350 | Malignant Neoplasms | CST7     | 0.00073  | -51.995482 |  |
| 15351 | Malignant Neoplasms | BAT2L2   | 0        | -51.783462 |  |
| 15352 | Malignant Neoplasms | AGFG1    | 0        | -51.450292 |  |
| 15353 | Malignant Neoplasms | CD44     | 0        | -51.404211 |  |
| 15354 | Malignant Neoplasms | YTHDF1   | 0        | -51.053256 |  |
| 15355 | Malignant Neoplasms | SF1      | 0        | -50.622916 |  |
| 15356 | Malignant Neoplasms | MLXIPL   | 0.000135 | -49.95375  |  |
| 15357 | Malignant Neoplasms | FLOT1    | 0        | -49.01746  |  |
| 15358 | Malignant Neoplasms | JMY      | 0        | -48.76432  |  |
| 15359 | Malignant Neoplasms | GPATCH4  | 0        | -48.577115 |  |
| 15360 | Malignant Neoplasms | RC3H1    | 0        | -48.332081 |  |
| 15361 | Malignant Neoplasms | ESYT2    | 0        | -48.124221 |  |
| 15362 | Malignant Neoplasms | USP48    | 0        | -47.980034 |  |
| 15363 | Malignant Neoplasms | CARS     | 0        | -47.938461 |  |
| 15364 | Malignant Neoplasms | GUK1     | 0        | -47.833795 |  |
| 15365 | Malignant Neoplasms | ARPC5L   | 0        | -46.684321 |  |
| 15366 | Malignant Neoplasms | WDR5     | 0        | -46.139731 |  |
| 15367 | Malignant Neoplasms | CCDC130  | 0        | -46.01197  |  |
| 15368 | Malignant Neoplasms | ABHD12B  | 0.000114 | -45.527992 |  |
| 15369 | Malignant Neoplasms | SLC16A6  | 0.000112 | -45.020838 |  |
| 15370 | Malignant Neoplasms | GLI3     | 0.000538 | -44.985278 |  |
| 15371 | Malignant Neoplasms | RBM39    | 0        | -44.756391 |  |
| 15372 | Malignant Neoplasms | TNPO1    | 0        | -44.533533 |  |
| 15373 | Malignant Neoplasms | DDX18    | 0        | -43.936319 |  |
| 15374 | Malignant Neoplasms | C17orf79 | 0        | -43.463288 |  |
| 15375 | Malignant Neoplasms | LRRC58   | 0        | -43.039506 |  |
| 15376 | Malignant Neoplasms | FERMT2   | 0.000392 | -42.651875 |  |
| 15377 | Malignant Neoplasms | TUBB3    | 0        | -42.432917 |  |
| 15378 | Malignant Neoplasms | SOD3     | 0        | -42.369169 |  |
| 15379 | Malignant Neoplasms | DAZAP1   | 0        | -42.33826  |  |
| 15380 | Malignant Neoplasms | RRAGD    | 0.000244 | -41.635175 |  |
| 15381 | Malignant Neoplasms | TMED9    | 0        | -41.153279 |  |
| 15382 | Malignant Neoplasms | SEC22C   | 0        | -41.10736  |  |
| 15383 | Malignant Neoplasms | GSPT1    | 0        | -41.093295 |  |
| 15384 | Malignant Neoplasms | NFX1     | 0        | -40.983529 |  |
| 15385 | Malignant Neoplasms | PKIG     | 0        | -40.875872 |  |
| 15386 | Malignant Neoplasms | AIDA     | 0        | -40.547627 |  |
| 15387 | Malignant Neoplasms | RAI1     | 0        | -40.436391 |  |
| 15388 | Malignant Neoplasms | SSH1     | 0        | -40.001006 |  |
| 15389 | Malignant Neoplasms | PMP22    | 0.000573 | -39.852473 |  |
| 15390 | Malignant Neoplasms | MPV17    | 0        | -39.576468 |  |
| 15391 | Malignant Neoplasms | CHST11   | 0.000647 | -39.427776 |  |
| 15392 | Malignant Neoplasms | SF3B4    | 0        | -39.27583  |  |
| 15393 | Malignant Neoplasms | PCDHGA1  | 0        | -39.092216 |  |
| 15394 | Malignant Neoplasms | SLC25A14 | 0        | -39.035575 |  |
| 15395 | Malignant Neoplasms | SRSF5    | 0        | -38.767781 |  |
| 15396 | Malignant Neoplasms | GTPBP4   | 0        | -38.623321 |  |
| 15397 | Malignant Neoplasms | ACTN1    | 0        | -38.003615 |  |
| 15398 | Malignant Neoplasms | ZNF259   | 0        | -37.790142 |  |

|       |                     |              |          |            |  |
|-------|---------------------|--------------|----------|------------|--|
| 15399 | Malignant Neoplasms | TNFAIP8L1    | 0        | -36.129553 |  |
| 15400 | Malignant Neoplasms | USP14        | 0        | -35.881885 |  |
| 15401 | Malignant Neoplasms | LOC283508    | 0        | -35.404046 |  |
| 15402 | Malignant Neoplasms | NENF         | 0        | -35.315207 |  |
| 15403 | Malignant Neoplasms | CDK11A       | 0        | -35.199934 |  |
| 15404 | Malignant Neoplasms | EXOC3        | 0        | -34.887351 |  |
| 15405 | Malignant Neoplasms | PURB         | 0        | -34.512453 |  |
| 15406 | Malignant Neoplasms | PFDN2        | 0        | -33.726677 |  |
| 15407 | Malignant Neoplasms | TNRC18       | 0        | -33.087083 |  |
| 15408 | Malignant Neoplasms | LEF1         | 0.000244 | -33.080288 |  |
| 15409 | Malignant Neoplasms | UBQLN2       | 0        | -33.054777 |  |
| 15410 | Malignant Neoplasms | EIF5B        | 0        | -32.997592 |  |
| 15411 | Malignant Neoplasms | DNM1L        | 0        | -32.985717 |  |
| 15412 | Malignant Neoplasms | MRFAP1       | 0        | -32.897746 |  |
| 15413 | Malignant Neoplasms | IDS          | 0        | -32.894405 |  |
| 15414 | Malignant Neoplasms | OAZ2         | 0        | -32.607813 |  |
| 15415 | Malignant Neoplasms | TAF1D        | 0        | -32.601524 |  |
| 15416 | Malignant Neoplasms | LOC643837    | 0        | -32.236147 |  |
| 15417 | Malignant Neoplasms | BRD8         | 0        | -32.196672 |  |
| 15418 | Malignant Neoplasms | WNT5A        | 0.000088 | -32.108019 |  |
| 15419 | Malignant Neoplasms | TCF25        | 0        | -32.093011 |  |
| 15420 | Malignant Neoplasms | CAPZB        | 0        | -31.885451 |  |
| 15421 | Malignant Neoplasms | CUEDC2       | 0        | -31.847655 |  |
| 15422 | Malignant Neoplasms | RBMS1        | 0        | -31.73637  |  |
| 15423 | Malignant Neoplasms | LOC221710    | 0        | -31.649041 |  |
| 15424 | Malignant Neoplasms | TFE3         | 0        | -31.46333  |  |
| 15425 | Malignant Neoplasms | TRBC1        | 0.000239 | -31.338611 |  |
| 15426 | Malignant Neoplasms | SNRPB2       | 0        | -31.300164 |  |
| 15427 | Malignant Neoplasms | C20orf43     | 0        | -31.282945 |  |
| 15428 | Malignant Neoplasms | RFNG         | 0        | -31.043018 |  |
| 15429 | Malignant Neoplasms | SEC16A       | 0        | -30.972818 |  |
| 15430 | Malignant Neoplasms | GJC1         | 0.000244 | -30.630617 |  |
| 15431 | Malignant Neoplasms | MAP7D2       | 0.000019 | -30.599756 |  |
| 15432 | Malignant Neoplasms | NGRN         | 0        | -30.570196 |  |
| 15433 | Malignant Neoplasms | MTCH1        | 0        | -30.45331  |  |
| 15434 | Malignant Neoplasms | SMAD5        | 0        | -30.406751 |  |
| 15435 | Malignant Neoplasms | LOC100130468 | 0.000244 | -29.523954 |  |
| 15436 | Malignant Neoplasms | CDC42SE1     | 0        | -29.52391  |  |
| 15437 | Malignant Neoplasms | C12orf44     | 0        | -29.507961 |  |
| 15438 | Malignant Neoplasms | CNPY2        | 0        | -29.461476 |  |
| 15439 | Malignant Neoplasms | SREK1IP1     | 0        | -29.447805 |  |
| 15440 | Malignant Neoplasms | H1FX         | 0        | -29.380688 |  |
| 15441 | Malignant Neoplasms | HDGFRP3      | 0.000085 | -29.291365 |  |
| 15442 | Malignant Neoplasms | SNHG7        | 0        | -28.954788 |  |
| 15443 | Malignant Neoplasms | ZNF451       | 0        | -28.662582 |  |
| 15444 | Malignant Neoplasms | VKORC1       | 0        | -28.591366 |  |
| 15445 | Malignant Neoplasms | CAPRIN2      | 0        | -28.282264 |  |
| 15446 | Malignant Neoplasms | DCTN6        | 0        | -28.167369 |  |
| 15447 | Malignant Neoplasms | CLASRP       | 0        | -28.056142 |  |
| 15448 | Malignant Neoplasms | YPEL5        | 0        | -27.965317 |  |



|       |                     |           |          |            |  |
|-------|---------------------|-----------|----------|------------|--|
| 15449 | Malignant Neoplasms | UBE2F     | 0        | -27.781424 |  |
| 15450 | Malignant Neoplasms | SRSF11    | 0        | -27.780094 |  |
| 15451 | Malignant Neoplasms | FOXP2     | 0.002498 | -27.659136 |  |
| 15452 | Malignant Neoplasms | B3GNT6    | 0.000062 | -27.448227 |  |
| 15453 | Malignant Neoplasms | ZAP70     | 0.000462 | -26.912814 |  |
| 15454 | Malignant Neoplasms | MAP1B     | 0.000047 | -26.873965 |  |
| 15455 | Malignant Neoplasms | ATP8B2    | 0        | -26.841983 |  |
| 15456 | Malignant Neoplasms | CSRP2     | 0.000095 | -26.742258 |  |
| 15457 | Malignant Neoplasms | SOCS2     | 0        | -26.017583 |  |
| 15458 | Malignant Neoplasms | SAR1A     | 0        | -25.877226 |  |
| 15459 | Malignant Neoplasms | ASB4      | 0.000622 | -25.719803 |  |
| 15460 | Malignant Neoplasms | DDX21     | 0        | -25.718588 |  |
| 15461 | Malignant Neoplasms | DCTN3     | 0        | -25.631929 |  |
| 15462 | Malignant Neoplasms | PER2      | 0        | -25.560169 |  |
| 15463 | Malignant Neoplasms | SCGB2A1   | 0.00296  | -25.494518 |  |
| 15464 | Malignant Neoplasms | CCNL2     | 0        | -25.488195 |  |
| 15465 | Malignant Neoplasms | LRRN4     | 0.000377 | -25.295268 |  |
| 15466 | Malignant Neoplasms | MYADM     | 0        | -25.033701 |  |
| 15467 | Malignant Neoplasms | HRAS      | 0        | -24.707673 |  |
| 15468 | Malignant Neoplasms | MMP28     | 0.00029  | -24.383882 |  |
| 15469 | Malignant Neoplasms | KIAA0020  | 0        | -24.258286 |  |
| 15470 | Malignant Neoplasms | NAA15     | 0        | -24.236099 |  |
| 15471 | Malignant Neoplasms | UBAP2     | 0        | -24.099723 |  |
| 15472 | Malignant Neoplasms | PKD1      | 0        | -23.726431 |  |
| 15473 | Malignant Neoplasms | RAB28     | 0        | -23.572336 |  |
| 15474 | Malignant Neoplasms | NMD3      | 0        | -23.570179 |  |
| 15475 | Malignant Neoplasms | WDYHV1    | 0        | -23.564175 |  |
| 15476 | Malignant Neoplasms | ADPGK     | 0        | -23.419754 |  |
| 15477 | Malignant Neoplasms | DDX27     | 0        | -23.366875 |  |
| 15478 | Malignant Neoplasms | HNRNPUL1  | 0        | -23.192493 |  |
| 15479 | Malignant Neoplasms | C14orf138 | 0        | -23.168943 |  |
| 15480 | Malignant Neoplasms | CIRBP     | 0        | -23.102411 |  |
| 15481 | Malignant Neoplasms | AHSA1     | 0        | -23.050441 |  |
| 15482 | Malignant Neoplasms | ATF5      | 0        | -22.998995 |  |
| 15483 | Malignant Neoplasms | TNFRSF1B  | 0.000304 | -22.658124 |  |
| 15484 | Malignant Neoplasms | LASS5     | 0        | -22.475119 |  |
| 15485 | Malignant Neoplasms | MAPKAPK2  | 0        | -22.431173 |  |
| 15486 | Malignant Neoplasms | LIMS3     | 0.000233 | -22.420179 |  |
| 15487 | Malignant Neoplasms | SEPW1     | 0        | -22.366304 |  |
| 15488 | Malignant Neoplasms | ABCE1     | 0        | -22.149229 |  |
| 15489 | Malignant Neoplasms | TSSC4     | 0        | -22.081952 |  |
| 15490 | Malignant Neoplasms | CTSL1     | 0        | -22.06845  |  |
| 15491 | Malignant Neoplasms | ATP13A3   | 0        | -21.795814 |  |
| 15492 | Malignant Neoplasms | KCNMA1    | 0.000529 | -21.649194 |  |
| 15493 | Malignant Neoplasms | UBR4      | 0        | -21.558458 |  |
| 15494 | Malignant Neoplasms | NCOR2     | 0        | -21.492022 |  |
| 15495 | Malignant Neoplasms | NXF1      | 0        | -21.392261 |  |
| 15496 | Malignant Neoplasms | PELO      | 0        | -21.288685 |  |
| 15497 | Malignant Neoplasms | LRMP      | 0.0036   | -20.996778 |  |
| 15498 | Malignant Neoplasms | CWH43     | 0.00122  | -20.467763 |  |

|       |                     |              |          |            |  |
|-------|---------------------|--------------|----------|------------|--|
| 15499 | Malignant Neoplasms | UBE2G2       | 0        | -20.125611 |  |
| 15500 | Malignant Neoplasms | PASD1        | 0.000244 | -20.078643 |  |
| 15501 | Malignant Neoplasms | SERTAD4      | 0.000207 | -20.029386 |  |
| 15502 | Malignant Neoplasms | ID2          | 0        | -19.990605 |  |
| 15503 | Malignant Neoplasms | PDE4A        | 0        | -19.934587 |  |
| 15504 | Malignant Neoplasms | TRPV2        | 0.000056 | -19.866161 |  |
| 15505 | Malignant Neoplasms | GJA3         | 0.000462 | -19.010394 |  |
| 15506 | Malignant Neoplasms | SPDEF        | 0.003466 | -18.98549  |  |
| 15507 | Malignant Neoplasms | MCFD2        | 0        | -18.663903 |  |
| 15508 | Malignant Neoplasms | GPR124       | 0        | -18.651304 |  |
| 15509 | Malignant Neoplasms | TRIM33       | 0        | -18.618862 |  |
| 15510 | Malignant Neoplasms | QKI          | 0.000056 | -18.551642 |  |
| 15511 | Malignant Neoplasms | L1CAM        | 0.000112 | -18.539945 |  |
| 15512 | Malignant Neoplasms | MARK3        | 0        | -18.521941 |  |
| 15513 | Malignant Neoplasms | ZCRB1        | 0        | -18.277216 |  |
| 15514 | Malignant Neoplasms | UGCG         | 0        | -18.250936 |  |
| 15515 | Malignant Neoplasms | LOC285074    | 0        | -18.23513  |  |
| 15516 | Malignant Neoplasms | GDI1         | 0        | -18.221594 |  |
| 15517 | Malignant Neoplasms | LHFP         | 0.000351 | -18.214573 |  |
| 15518 | Malignant Neoplasms | PIP5K1A      | 0        | -18.130832 |  |
| 15519 | Malignant Neoplasms | RUNX3        | 0.000095 | -18.120496 |  |
| 15520 | Malignant Neoplasms | HEG1         | 0.000392 | -17.931892 |  |
| 15521 | Malignant Neoplasms | DCAF16       | 0        | -17.846178 |  |
| 15522 | Malignant Neoplasms | RNF8         | 0        | -17.766129 |  |
| 15523 | Malignant Neoplasms | EPHX2        | 0.000521 | -17.745048 |  |
| 15524 | Malignant Neoplasms | C4orf46      | 0        | -17.37894  |  |
| 15525 | Malignant Neoplasms | UBE2H        | 0        | -17.318821 |  |
| 15526 | Malignant Neoplasms | PLAGL1       | 0.000244 | -17.310978 |  |
| 15527 | Malignant Neoplasms | NUB1         | 0        | -17.289582 |  |
| 15528 | Malignant Neoplasms | STC2         | 0.000084 | -17.253821 |  |
| 15529 | Malignant Neoplasms | RGPD4        | 0        | -17.187576 |  |
| 15530 | Malignant Neoplasms | CDC37L1      | 0        | -17.162162 |  |
| 15531 | Malignant Neoplasms | FN1          | 0.000122 | -16.972906 |  |
| 15532 | Malignant Neoplasms | BHLHE40      | 0.000286 | -16.543643 |  |
| 15533 | Malignant Neoplasms | BPGM         | 0        | -16.456924 |  |
| 15534 | Malignant Neoplasms | LOC100509635 | 0.000651 | -16.450784 |  |
| 15535 | Malignant Neoplasms | UBE2R2       | 0        | -16.333046 |  |
| 15536 | Malignant Neoplasms | CDC34        | 0        | -16.242861 |  |
| 15537 | Malignant Neoplasms | CHST5        | 0.003988 | -16.204897 |  |
| 15538 | Malignant Neoplasms | RAB24        | 0        | -16.104401 |  |
| 15539 | Malignant Neoplasms | PPFIBP1      | 0.000448 | -15.954224 |  |
| 15540 | Malignant Neoplasms | ANO5         | 0.000982 | -15.875208 |  |
| 15541 | Malignant Neoplasms | FAM92A1      | 0.000667 | -15.491007 |  |
| 15542 | Malignant Neoplasms | MAFK         | 0        | -15.376366 |  |
| 15543 | Malignant Neoplasms | RAB31        | 0.000244 | -15.274008 |  |
| 15544 | Malignant Neoplasms | ERGIC1       | 0        | -15.187199 |  |
| 15545 | Malignant Neoplasms | PNPLA8       | 0        | -15.171413 |  |
| 15546 | Malignant Neoplasms | SORBS1       | 0.000382 | -15.059719 |  |
| 15547 | Malignant Neoplasms | TIMM23       | 0        | -14.732531 |  |
| 15548 | Malignant Neoplasms | SAMD8        | 0        | -14.713755 |  |

|       |                     |              |          |            |  |
|-------|---------------------|--------------|----------|------------|--|
| 15549 | Malignant Neoplasms | KHSRP        | 0        | -14.479842 |  |
| 15550 | Malignant Neoplasms | FAM89B       | 0        | -14.341477 |  |
| 15551 | Malignant Neoplasms | LOC389834    | 0.000794 | -14.277037 |  |
| 15552 | Malignant Neoplasms | OLFM1        | 0.000649 | -14.088867 |  |
| 15553 | Malignant Neoplasms | FAM126A      | 0.000628 | -14.084965 |  |
| 15554 | Malignant Neoplasms | CADM1        | 0.000096 | -13.912684 |  |
| 15555 | Malignant Neoplasms | IL27RA       | 0.000402 | -13.902396 |  |
| 15556 | Malignant Neoplasms | FGFR1        | 0        | -13.825174 |  |
| 15557 | Malignant Neoplasms | FOXL2        | 0.000531 | -13.69078  |  |
| 15558 | Malignant Neoplasms | FAM131A      | 0        | -13.474246 |  |
| 15559 | Malignant Neoplasms | LOC100132273 | 0.000004 | -13.370863 |  |
| 15560 | Malignant Neoplasms | RPF2         | 0        | -13.364589 |  |
| 15561 | Malignant Neoplasms | PKD1P1       | 0        | -13.270869 |  |
| 15562 | Malignant Neoplasms | SAFB2        | 0        | -13.192629 |  |
| 15563 | Malignant Neoplasms | NID1         | 0.000088 | -13.144856 |  |
| 15564 | Malignant Neoplasms | CD109        | 0.000095 | -13.07047  |  |
| 15565 | Malignant Neoplasms | FADS1        | 0.000114 | -13.017573 |  |
| 15566 | Malignant Neoplasms | NELF         | 0        | -12.971041 |  |
| 15567 | Malignant Neoplasms | ZNF639       | 0        | -12.820294 |  |
| 15568 | Malignant Neoplasms | DKK3         | 0.000071 | -12.616375 |  |
| 15569 | Malignant Neoplasms | IQCJ-SCHIP1  | 0.000647 | -12.560094 |  |
| 15570 | Malignant Neoplasms | MSRB2        | 0        | -12.344785 |  |
| 15571 | Malignant Neoplasms | HOXC10       | 0.000833 | -12.296945 |  |
| 15572 | Malignant Neoplasms | STMN3        | 0.000102 | -12.028023 |  |
| 15573 | Malignant Neoplasms | MAN1C1       | 0        | -12.015512 |  |
| 15574 | Malignant Neoplasms | CD1D         | 0.000358 | -11.888861 |  |
| 15575 | Malignant Neoplasms | CACHD1       | 0.000581 | -11.709604 |  |
| 15576 | Malignant Neoplasms | RSRC2        | 0        | -11.672737 |  |
| 15577 | Malignant Neoplasms | MYO5A        | 0.000647 | -11.66966  |  |
| 15578 | Malignant Neoplasms | CKMT2        | 0.000169 | -11.600607 |  |
| 15579 | Malignant Neoplasms | KLF9         | 0.003783 | -11.537512 |  |
| 15580 | Malignant Neoplasms | CCDC12       | 0        | -11.480802 |  |
| 15581 | Malignant Neoplasms | PPP1R14C     | 0.000471 | -11.465546 |  |
| 15582 | Malignant Neoplasms | PNMA2        | 0.000104 | -11.233506 |  |
| 15583 | Malignant Neoplasms | BRD2         | 0        | -11.178387 |  |
| 15584 | Malignant Neoplasms | C9orf30      | 0        | -11.165766 |  |
| 15585 | Malignant Neoplasms | CCDC146      | 0.000022 | -11.056943 |  |
| 15586 | Malignant Neoplasms | PHC2         | 0        | -10.775748 |  |
| 15587 | Malignant Neoplasms | SPINK4       | 0        | -10.604966 |  |
| 15588 | Malignant Neoplasms | ISG20L2      | 0        | -10.556466 |  |
| 15589 | Malignant Neoplasms | SCIN         | 0.000675 | -10.535578 |  |
| 15590 | Malignant Neoplasms | ZG16         | 0.000001 | -10.523496 |  |
| 15591 | Malignant Neoplasms | MAT2A        | 0        | -10.435096 |  |
| 15592 | Malignant Neoplasms | TIMP3        | 0.000675 | -10.419209 |  |
| 15593 | Malignant Neoplasms | FAM83F       | 0.000419 | -10.407689 |  |
| 15594 | Malignant Neoplasms | SAT2         | 0.000099 | -10.402509 |  |
| 15595 | Malignant Neoplasms | ACOT11       | 0.004247 | -10.396793 |  |
| 15596 | Malignant Neoplasms | GXYLT2       | 0.000255 | -10.359103 |  |
| 15597 | Malignant Neoplasms | NTRK2        | 0.000382 | -10.306842 |  |
| 15598 | Malignant Neoplasms | NEAT1        | 0        | -10.285    |  |

|       |                     |              |          |            |  |
|-------|---------------------|--------------|----------|------------|--|
| 15599 | Malignant Neoplasms | DTNB         | 0.000445 | -10.209464 |  |
| 15600 | Malignant Neoplasms | DDX47        | 0        | -10.194378 |  |
| 15601 | Malignant Neoplasms | PPP1R9A      | 0.000004 | -10.144455 |  |
| 15602 | Malignant Neoplasms | CA4          | 0.000001 | -10.09118  |  |
| 15603 | Malignant Neoplasms | GGA1         | 0        | -10.072485 |  |
| 15604 | Malignant Neoplasms | DQX1         | 0.004044 | -10.025782 |  |
| 15605 | Malignant Neoplasms | ZEB1         | 0.00085  | -9.880126  |  |
| 15606 | Malignant Neoplasms | KDM6B        | 0        | -9.832849  |  |
| 15607 | Malignant Neoplasms | FLJ45445     | 0        | -9.799125  |  |
| 15608 | Malignant Neoplasms | CREB3L1      | 0.003101 | -9.594399  |  |
| 15609 | Malignant Neoplasms | RAB27B       | 0.000026 | -9.499798  |  |
| 15610 | Malignant Neoplasms | FHOD3        | 0.00026  | -9.498485  |  |
| 15611 | Malignant Neoplasms | USP42        | 0        | -9.486286  |  |
| 15612 | Malignant Neoplasms | CACNB2       | 0.000114 | -9.483538  |  |
| 15613 | Malignant Neoplasms | TMSB15B      | 0.00058  | -9.46368   |  |
| 15614 | Malignant Neoplasms | WNT6         | 0.000244 | -9.436647  |  |
| 15615 | Malignant Neoplasms | ASAP3        | 0.002559 | -9.13715   |  |
| 15616 | Malignant Neoplasms | ZBTB7C       | 0.00056  | -9.045275  |  |
| 15617 | Malignant Neoplasms | RBM20        | 0.000241 | -8.976458  |  |
| 15618 | Malignant Neoplasms | FOXA1        | 0.003339 | -8.939768  |  |
| 15619 | Malignant Neoplasms | ALDH1A1      | 0.003273 | -8.905504  |  |
| 15620 | Malignant Neoplasms | P2RX5        | 0.000466 | -8.892187  |  |
| 15621 | Malignant Neoplasms | 4-Sep        | 0.000152 | -8.870024  |  |
| 15622 | Malignant Neoplasms | FABP1        | 0        | -8.719388  |  |
| 15623 | Malignant Neoplasms | SYT17        | 0.000365 | -8.713691  |  |
| 15624 | Malignant Neoplasms | NOD2         | 0.000327 | -8.711971  |  |
| 15625 | Malignant Neoplasms | KCNK10       | 0.000558 | -8.692129  |  |
| 15626 | Malignant Neoplasms | LOC100129069 | 0.001754 | -8.641304  |  |
| 15627 | Malignant Neoplasms | HMGCS2       | 0.000405 | -8.54771   |  |
| 15628 | Malignant Neoplasms | BIK          | 0.000004 | -8.498466  |  |
| 15629 | Malignant Neoplasms | HACE1        | 0.000417 | -8.496176  |  |
| 15630 | Malignant Neoplasms | FKBP1B       | 0.000286 | -8.458062  |  |
| 15631 | Malignant Neoplasms | C6orf168     | 0.000278 | -8.391398  |  |
| 15632 | Malignant Neoplasms | SHROOM2      | 0.000326 | -8.375547  |  |
| 15633 | Malignant Neoplasms | HGD          | 0.001124 | -8.34414   |  |
| 15634 | Malignant Neoplasms | NCRNA00173   | 0.000861 | -8.343959  |  |
| 15635 | Malignant Neoplasms | FLJ32063     | 0.00281  | -8.296896  |  |
| 15636 | Malignant Neoplasms | KIAA1211     | 0.000154 | -8.170336  |  |
| 15637 | Malignant Neoplasms | WWTR1        | 0.000448 | -8.142748  |  |
| 15638 | Malignant Neoplasms | ELF2         | 0        | -8.053555  |  |
| 15639 | Malignant Neoplasms | CLCA4        | 0.000002 | -8.038073  |  |
| 15640 | Malignant Neoplasms | LYN          | 0.000005 | -8.015746  |  |
| 15641 | Malignant Neoplasms | OSBPL6       | 0.000392 | -7.987632  |  |
| 15642 | Malignant Neoplasms | CEACAM7      | 0.000001 | -7.835955  |  |
| 15643 | Malignant Neoplasms | NR3C2        | 0.000114 | -7.832787  |  |
| 15644 | Malignant Neoplasms | DNHD1        | 0.00009  | -7.832598  |  |
| 15645 | Malignant Neoplasms | ITM2A        | 0.004857 | -7.7829    |  |
| 15646 | Malignant Neoplasms | TPBG         | 0.005167 | -7.771458  |  |
| 15647 | Malignant Neoplasms | FABP3        | 0.000339 | -7.759696  |  |
| 15648 | Malignant Neoplasms | NFE2         | 0.000244 | -7.710593  |  |

|       |                     |              |          |           |  |
|-------|---------------------|--------------|----------|-----------|--|
| 15649 | Malignant Neoplasms | IQCG         | 0.000154 | -7.705877 |  |
| 15650 | Malignant Neoplasms | LOC100130357 | 0.000038 | -7.663775 |  |
| 15651 | Malignant Neoplasms | BLVRA        | 0.000647 | -7.631662 |  |
| 15652 | Malignant Neoplasms | KLF4         | 0.003466 | -7.611532 |  |
| 15653 | Malignant Neoplasms | RYBP         | 0        | -7.548279 |  |
| 15654 | Malignant Neoplasms | GLIS3        | 0.000782 | -7.497044 |  |
| 15655 | Malignant Neoplasms | ERN2         | 0.000972 | -7.486607 |  |
| 15656 | Malignant Neoplasms | TSPAN2       | 0.000263 | -7.480316 |  |
| 15657 | Malignant Neoplasms | MOGAT2       | 0.000358 | -7.460037 |  |
| 15658 | Malignant Neoplasms | PHF13        | 0        | -7.426994 |  |
| 15659 | Malignant Neoplasms | ZNF420       | 0.000647 | -7.423682 |  |
| 15660 | Malignant Neoplasms | CCDC104      | 0        | -7.356899 |  |
| 15661 | Malignant Neoplasms | B3GALT5      | 0.000358 | -7.341713 |  |
| 15662 | Malignant Neoplasms | OR51I1       | 0.004706 | -7.291565 |  |
| 15663 | Malignant Neoplasms | MT1F         | 0.000538 | -7.277401 |  |
| 15664 | Malignant Neoplasms | PLS3         | 0.00009  | -7.214046 |  |
| 15665 | Malignant Neoplasms | DOCK8        | 0.004993 | -7.212796 |  |
| 15666 | Malignant Neoplasms | LAMA1        | 0.002619 | -7.153433 |  |
| 15667 | Malignant Neoplasms | SLC16A2      | 0.000647 | -7.125774 |  |
| 15668 | Malignant Neoplasms | C14orf50     | 0.000358 | -7.032244 |  |
| 15669 | Malignant Neoplasms | CPSF2        | 0.000061 | -6.975072 |  |
| 15670 | Malignant Neoplasms | GRAMD3       | 0.000488 | -6.964465 |  |
| 15671 | Malignant Neoplasms | FLJ21511     | 0        | -6.869291 |  |
| 15672 | Malignant Neoplasms | TCEAL2       | 0.000006 | -6.859401 |  |
| 15673 | Malignant Neoplasms | HP1BP3       | 0        | -6.799139 |  |
| 15674 | Malignant Neoplasms | CCNJL        | 0.000163 | -6.772087 |  |
| 15675 | Malignant Neoplasms | C11orf93     | 0.001565 | -6.711384 |  |
| 15676 | Malignant Neoplasms | SPATA18      | 0.003433 | -6.664482 |  |
| 15677 | Malignant Neoplasms | TAF15        | 0        | -6.66311  |  |
| 15678 | Malignant Neoplasms | FGF20        | 0.000252 | -6.654826 |  |
| 15679 | Malignant Neoplasms | LHX6         | 0.000273 | -6.644605 |  |
| 15680 | Malignant Neoplasms | FARSB        | 0.00277  | -6.56314  |  |
| 15681 | Malignant Neoplasms | GBA3         | 0        | -6.560875 |  |
| 15682 | Malignant Neoplasms | DPF3         | 0.000202 | -6.507991 |  |
| 15683 | Malignant Neoplasms | BCL2L15      | 0.000428 | -6.502587 |  |
| 15684 | Malignant Neoplasms | C7           | 0        | -6.423415 |  |
| 15685 | Malignant Neoplasms | SIX1         | 0.000433 | -6.42248  |  |
| 15686 | Malignant Neoplasms | MDFIC        | 0.000923 | -6.391231 |  |
| 15687 | Malignant Neoplasms | PLCL2        | 0.003101 | -6.299826 |  |
| 15688 | Malignant Neoplasms | RAB39B       | 0.000179 | -6.222458 |  |
| 15689 | Malignant Neoplasms | ZFP14        | 0.000424 | -6.185132 |  |
| 15690 | Malignant Neoplasms | MT1G         | 0.000373 | -6.174671 |  |
| 15691 | Malignant Neoplasms | ITPR1        | 0.00003  | -6.173306 |  |
| 15692 | Malignant Neoplasms | NR3C1        | 0.000517 | -6.067312 |  |
| 15693 | Malignant Neoplasms | CBFA2T3      | 0.000405 | -6.06337  |  |
| 15694 | Malignant Neoplasms | CXCL12       | 0        | -6.025157 |  |
| 15695 | Malignant Neoplasms | HPGDS        | 0.00138  | -5.994216 |  |
| 15696 | Malignant Neoplasms | GPR155       | 0.000239 | -5.97031  |  |
| 15697 | Malignant Neoplasms | RABL4        | 0.000209 | -5.953176 |  |
| 15698 | Malignant Neoplasms | FAM43A       | 0.000491 | -5.93246  |  |

|       |                     |           |          |           |  |
|-------|---------------------|-----------|----------|-----------|--|
| 15699 | Malignant Neoplasms | PSMG4     | 0.00332  | -5.931413 |  |
| 15700 | Malignant Neoplasms | OSBPL3    | 0.000112 | -5.89578  |  |
| 15701 | Malignant Neoplasms | EPHA4     | 0.000134 | -5.882295 |  |
| 15702 | Malignant Neoplasms | SLC9A2    | 0.004579 | -5.796233 |  |
| 15703 | Malignant Neoplasms | TPH1      | 0        | -5.793849 |  |
| 15704 | Malignant Neoplasms | FMNL2     | 0.000204 | -5.762469 |  |
| 15705 | Malignant Neoplasms | JAG1      | 0.000087 | -5.705999 |  |
| 15706 | Malignant Neoplasms | FRMD3     | 0.004638 | -5.691552 |  |
| 15707 | Malignant Neoplasms | ABCC5     | 0.000451 | -5.681788 |  |
| 15708 | Malignant Neoplasms | NT5M      | 0.000521 | -5.666996 |  |
| 15709 | Malignant Neoplasms | SLC16A7   | 0.003386 | -5.613971 |  |
| 15710 | Malignant Neoplasms | FAM69A    | 0.000268 | -5.60504  |  |
| 15711 | Malignant Neoplasms | ACTG2     | 0        | -5.576115 |  |
| 15712 | Malignant Neoplasms | AQP8      | 0.000157 | -5.570023 |  |
| 15713 | Malignant Neoplasms | ITPRIPL1  | 0.00058  | -5.532122 |  |
| 15714 | Malignant Neoplasms | CHP2      | 0.004857 | -5.506835 |  |
| 15715 | Malignant Neoplasms | ANKRD42   | 0.000082 | -5.496973 |  |
| 15716 | Malignant Neoplasms | HDDC2     | 0.000414 | -5.463333 |  |
| 15717 | Malignant Neoplasms | PRKAA2    | 0.000462 | -5.444732 |  |
| 15718 | Malignant Neoplasms | KLF7      | 0.000649 | -5.373335 |  |
| 15719 | Malignant Neoplasms | MS4A12    | 0.000032 | -5.360331 |  |
| 15720 | Malignant Neoplasms | CYP4V2    | 0.000035 | -5.342829 |  |
| 15721 | Malignant Neoplasms | ODZ2      | 0.000531 | -5.32371  |  |
| 15722 | Malignant Neoplasms | LOC643072 | 0.003988 | -5.284507 |  |
| 15723 | Malignant Neoplasms | C20orf194 | 0.000391 | -5.282965 |  |
| 15724 | Malignant Neoplasms | XLKD1     | 0        | -5.253411 |  |
| 15725 | Malignant Neoplasms | RNF125    | 0.003737 | -5.236229 |  |
| 15726 | Malignant Neoplasms | SIDT1     | 0.000358 | -5.216442 |  |
| 15727 | Malignant Neoplasms | ITGA7     | 0.000392 | -5.212705 |  |
| 15728 | Malignant Neoplasms | MATN2     | 0.000471 | -5.191578 |  |
| 15729 | Malignant Neoplasms | TIAM1     | 0.000244 | -5.166496 |  |
| 15730 | Malignant Neoplasms | MCTP2     | 0.000114 | -5.145834 |  |
| 15731 | Malignant Neoplasms | CSDE1     | 0        | -5.143108 |  |
| 15732 | Malignant Neoplasms | IGLL3     | 0.000497 | -5.135458 |  |
| 15733 | Malignant Neoplasms | ABCA8     | 0        | -5.130991 |  |
| 15734 | Malignant Neoplasms | RTDR1     | 0.000423 | -5.050415 |  |
| 15735 | Malignant Neoplasms | VSTM2A    | 0.002883 | -5.04434  |  |
| 15736 | Malignant Neoplasms | NR5A2     | 0.00211  | -5.041885 |  |
| 15737 | Malignant Neoplasms | ACOX3     | 0.000135 | -5.000085 |  |
| 15738 | Malignant Neoplasms | TNFRSF11A | 0.000529 | -4.980546 |  |
| 15739 | Malignant Neoplasms | EFHC2     | 0.000215 | -4.968653 |  |
| 15740 | Malignant Neoplasms | STX6      | 0.000154 | -4.962607 |  |
| 15741 | Malignant Neoplasms | MSI2      | 0.000015 | -4.960336 |  |
| 15742 | Malignant Neoplasms | VILL      | 0.000651 | -4.956432 |  |
| 15743 | Malignant Neoplasms | GOLM1     | 0.000215 | -4.926988 |  |
| 15744 | Malignant Neoplasms | GBE1      | 0.000373 | -4.92179  |  |
| 15745 | Malignant Neoplasms | DENND1B   | 0.002619 | -4.908923 |  |
| 15746 | Malignant Neoplasms | CFL2      | 0.00073  | -4.877337 |  |
| 15747 | Malignant Neoplasms | C2orf88   | 0.001516 | -4.861751 |  |
| 15748 | Malignant Neoplasms | KIAA1731  | 0.004141 | -4.835946 |  |

|       |                     |              |          |           |  |
|-------|---------------------|--------------|----------|-----------|--|
| 15749 | Malignant Neoplasms | DEGS2        | 0.004217 | -4.794887 |  |
| 15750 | Malignant Neoplasms | KSR2         | 0.004857 | -4.793552 |  |
| 15751 | Malignant Neoplasms | NIN          | 0.000024 | -4.790656 |  |
| 15752 | Malignant Neoplasms | TRPM6        | 0.000711 | -4.765605 |  |
| 15753 | Malignant Neoplasms | PTPRN2       | 0.000425 | -4.763522 |  |
| 15754 | Malignant Neoplasms | MAPK10       | 0.010117 | -4.758095 |  |
| 15755 | Malignant Neoplasms | TEX9         | 0.003737 | -4.753316 |  |
| 15756 | Malignant Neoplasms | BBS9         | 0.000093 | -4.738447 |  |
| 15757 | Malignant Neoplasms | TEP1         | 0.00237  | -4.711473 |  |
| 15758 | Malignant Neoplasms | SLC4A4       | 0        | -4.708871 |  |
| 15759 | Malignant Neoplasms | PRODH        | 0.000213 | -4.705215 |  |
| 15760 | Malignant Neoplasms | KLK1         | 0.00332  | -4.696096 |  |
| 15761 | Malignant Neoplasms | BEX4         | 0.000647 | -4.68933  |  |
| 15762 | Malignant Neoplasms | LCK          | 0.000158 | -4.674262 |  |
| 15763 | Malignant Neoplasms | LOC100506589 | 0.001854 | -4.673174 |  |
| 15764 | Malignant Neoplasms | ZBTB47       | 0.000521 | -4.669141 |  |
| 15765 | Malignant Neoplasms | CCL28        | 0.000605 | -4.654903 |  |
| 15766 | Malignant Neoplasms | C16orf53     | 0.003149 | -4.649649 |  |
| 15767 | Malignant Neoplasms | OXGR1        | 0.00054  | -4.647567 |  |
| 15768 | Malignant Neoplasms | CDK15        | 0.000637 | -4.621657 |  |
| 15769 | Malignant Neoplasms | LOC650794    | 0.000112 | -4.604266 |  |
| 15770 | Malignant Neoplasms | MYL9         | 0.000267 | -4.572219 |  |
| 15771 | Malignant Neoplasms | GNE          | 0.004141 | -4.563829 |  |
| 15772 | Malignant Neoplasms | CRTAP        | 0.000102 | -4.533045 |  |
| 15773 | Malignant Neoplasms | RBP7         | 0.000326 | -4.530603 |  |
| 15774 | Malignant Neoplasms | SLC2A4       | 0.000278 | -4.512144 |  |
| 15775 | Malignant Neoplasms | PDLIM3       | 0.000847 | -4.486607 |  |
| 15776 | Malignant Neoplasms | MCOLN2       | 0.000103 | -4.485904 |  |
| 15777 | Malignant Neoplasms | TOX          | 0.001493 | -4.475666 |  |
| 15778 | Malignant Neoplasms | NRP2         | 0.000636 | -4.46815  |  |
| 15779 | Malignant Neoplasms | PARVA        | 0.002922 | -4.438447 |  |
| 15780 | Malignant Neoplasms | TFCP2L1      | 0.000047 | -4.434301 |  |
| 15781 | Malignant Neoplasms | AFAP1L1      | 0.000168 | -4.429256 |  |
| 15782 | Malignant Neoplasms | SSTR1        | 0.003988 | -4.42735  |  |
| 15783 | Malignant Neoplasms | SIAE         | 0.001854 | -4.411799 |  |
| 15784 | Malignant Neoplasms | OR4N4        | 0.000204 | -4.395892 |  |
| 15785 | Malignant Neoplasms | RAB27A       | 0.00002  | -4.39503  |  |
| 15786 | Malignant Neoplasms | ARMCX4       | 0.003737 | -4.391212 |  |
| 15787 | Malignant Neoplasms | LOC727916    | 0.005164 | -4.380807 |  |
| 15788 | Malignant Neoplasms | FAS          | 0.002883 | -4.344731 |  |
| 15789 | Malignant Neoplasms | NRG2         | 0.000392 | -4.324364 |  |
| 15790 | Malignant Neoplasms | CGGBP1       | 0.000061 | -4.315759 |  |
| 15791 | Malignant Neoplasms | LXN          | 0.001245 | -4.295182 |  |
| 15792 | Malignant Neoplasms | SLC26A2      | 0        | -4.277242 |  |
| 15793 | Malignant Neoplasms | LOC728448    | 0.000234 | -4.251742 |  |
| 15794 | Malignant Neoplasms | LOC100128288 | 0.004857 | -4.240265 |  |
| 15795 | Malignant Neoplasms | FYB          | 0.003433 | -4.225236 |  |
| 15796 | Malignant Neoplasms | DDX26B       | 0.004644 | -4.223636 |  |
| 15797 | Malignant Neoplasms | JAZF1        | 0.000057 | -4.218977 |  |
| 15798 | Malignant Neoplasms | ANG          | 0.000488 | -4.192727 |  |

|       |                     |              |          |           |  |
|-------|---------------------|--------------|----------|-----------|--|
| 15799 | Malignant Neoplasms | LOC100216546 | 0.000776 | -4.176673 |  |
| 15800 | Malignant Neoplasms | EBF1         | 0.004544 | -4.164009 |  |
| 15801 | Malignant Neoplasms | TEX11        | 0.001604 | -4.140414 |  |
| 15802 | Malignant Neoplasms | TBXAS1       | 0.000237 | -4.081353 |  |
| 15803 | Malignant Neoplasms | MAPRE2       | 0.000193 | -4.080819 |  |
| 15804 | Malignant Neoplasms | STYK1        | 0.000446 | -4.069078 |  |
| 15805 | Malignant Neoplasms | TCEA3        | 0.003014 | -4.058089 |  |
| 15806 | Malignant Neoplasms | CXCL14       | 0.000133 | -4.05581  |  |
| 15807 | Malignant Neoplasms | LOC728903    | 0.001325 | -4.04142  |  |
| 15808 | Malignant Neoplasms | CLEC3B       | 0        | -4.038001 |  |
| 15809 | Malignant Neoplasms | PAFAH2       | 0.001196 | -4.022292 |  |
| 15810 | Malignant Neoplasms | SAT1         | 0.000035 | -4.017131 |  |
| 15811 | Malignant Neoplasms | NMNAT3       | 0.000756 | -4.014329 |  |
| 15812 | Malignant Neoplasms | KCTD1        | 0.00296  | -4.01414  |  |
| 15813 | Malignant Neoplasms | GPR27        | 0.004668 | -4.013727 |  |
| 15814 | Malignant Neoplasms | QSOX1        | 0.003047 | -3.986606 |  |
| 15815 | Malignant Neoplasms | EFNB3        | 0.00058  | -3.969069 |  |
| 15816 | Malignant Neoplasms | UBQLN4       | 0.004931 | -3.93261  |  |
| 15817 | Malignant Neoplasms | SH3BGR       | 0.000209 | -3.931459 |  |
| 15818 | Malignant Neoplasms | RUNX2        | 0.000095 | -3.909275 |  |
| 15819 | Malignant Neoplasms | EHF          | 0.001404 | -3.901229 |  |
| 15820 | Malignant Neoplasms | CARD16       | 0.003031 | -3.878799 |  |
| 15821 | Malignant Neoplasms | CAPN13       | 0.002883 | -3.8648   |  |
| 15822 | Malignant Neoplasms | USP13        | 0.000208 | -3.858849 |  |
| 15823 | Malignant Neoplasms | TTL5         | 0.004629 | -3.848962 |  |
| 15824 | Malignant Neoplasms | XPO7         | 0.000273 | -3.848652 |  |
| 15825 | Malignant Neoplasms | DST          | 0        | -3.84509  |  |
| 15826 | Malignant Neoplasms | C4orf34      | 0.000493 | -3.841658 |  |
| 15827 | Malignant Neoplasms | AKAP2        | 0.000749 | -3.840142 |  |
| 15828 | Malignant Neoplasms | MTERFD2      | 0.000193 | -3.831917 |  |
| 15829 | Malignant Neoplasms | BCAR3        | 0.001754 | -3.82109  |  |
| 15830 | Malignant Neoplasms | C1orf21      | 0.000694 | -3.812153 |  |
| 15831 | Malignant Neoplasms | SYTL2        | 0.001871 | -3.807608 |  |
| 15832 | Malignant Neoplasms | LOC389160    | 0        | -3.801994 |  |
| 15833 | Malignant Neoplasms | LOC100134119 | 0.000393 | -3.788561 |  |
| 15834 | Malignant Neoplasms | HLA-DQB1     | 0.00013  | -3.786985 |  |
| 15835 | Malignant Neoplasms | ACVRL1       | 0.002015 | -3.786947 |  |
| 15836 | Malignant Neoplasms | PHF7         | 0.004347 | -3.782336 |  |
| 15837 | Malignant Neoplasms | ANGPTL1      | 0        | -3.78057  |  |
| 15838 | Malignant Neoplasms | PRPS2        | 0.000025 | -3.77657  |  |
| 15839 | Malignant Neoplasms | CCDC68       | 0.002058 | -3.775933 |  |
| 15840 | Malignant Neoplasms | LOC442270    | 0.000058 | -3.748188 |  |
| 15841 | Malignant Neoplasms | ADH6         | 0.002922 | -3.740311 |  |
| 15842 | Malignant Neoplasms | HNRNPD       | 0.004611 | -3.731405 |  |
| 15843 | Malignant Neoplasms | ASPA         | 0        | -3.729354 |  |
| 15844 | Malignant Neoplasms | ACOT9        | 0.000039 | -3.725177 |  |
| 15845 | Malignant Neoplasms | RAB26        | 0.00113  | -3.719949 |  |
| 15846 | Malignant Neoplasms | SMA4         | 0.000392 | -3.705228 |  |
| 15847 | Malignant Neoplasms | SPECC1       | 0.004848 | -3.698745 |  |
| 15848 | Malignant Neoplasms | SFRS18       | 0.001805 | -3.6981   |  |



|       |                     |            |          |           |  |
|-------|---------------------|------------|----------|-----------|--|
| 15849 | Malignant Neoplasms | CCDC88A    | 0.00058  | -3.694598 |  |
| 15850 | Malignant Neoplasms | CDC42SE2   | 0.000392 | -3.667925 |  |
| 15851 | Malignant Neoplasms | CLMN       | 0.000358 | -3.643807 |  |
| 15852 | Malignant Neoplasms | FAM149A    | 0.004517 | -3.641557 |  |
| 15853 | Malignant Neoplasms | MAOA       | 0.00219  | -3.624132 |  |
| 15854 | Malignant Neoplasms | C14orf106  | 0.004644 | -3.614466 |  |
| 15855 | Malignant Neoplasms | FBLN1      | 0.000002 | -3.606652 |  |
| 15856 | Malignant Neoplasms | TNFRSF19   | 0.000449 | -3.604152 |  |
| 15857 | Malignant Neoplasms | VPS26A     | 0.002559 | -3.599722 |  |
| 15858 | Malignant Neoplasms | TRAPPC10   | 0.00293  | -3.583657 |  |
| 15859 | Malignant Neoplasms | ADAMTS8    | 0.000466 | -3.554192 |  |
| 15860 | Malignant Neoplasms | TPSG1      | 0        | -3.549494 |  |
| 15861 | Malignant Neoplasms | DMXL2      | 0.002619 | -3.539085 |  |
| 15862 | Malignant Neoplasms | LOC157562  | 0.000135 | -3.527667 |  |
| 15863 | Malignant Neoplasms | ARMC8      | 0.00345  | -3.52509  |  |
| 15864 | Malignant Neoplasms | C17orf51   | 0.000392 | -3.520076 |  |
| 15865 | Malignant Neoplasms | MYC        | 0.0005   | -3.515492 |  |
| 15866 | Malignant Neoplasms | FLJ27352   | 0.001463 | -3.511211 |  |
| 15867 | Malignant Neoplasms | REG4       | 0.000059 | -3.503367 |  |
| 15868 | Malignant Neoplasms | C1orf226   | 0.000353 | -3.482497 |  |
| 15869 | Malignant Neoplasms | PTPN21     | 0.001057 | -3.479038 |  |
| 15870 | Malignant Neoplasms | SAMD13     | 0.000333 | -3.468445 |  |
| 15871 | Malignant Neoplasms | FRMD4B     | 0.0037   | -3.467352 |  |
| 15872 | Malignant Neoplasms | RGL1       | 0.000801 | -3.444498 |  |
| 15873 | Malignant Neoplasms | MIA        | 0.000886 | -3.441869 |  |
| 15874 | Malignant Neoplasms | EXDL2      | 0.000144 | -3.428238 |  |
| 15875 | Malignant Neoplasms | LOH12CR1   | 0.0001   | -3.425623 |  |
| 15876 | Malignant Neoplasms | NCRNA00081 | 0.000927 | -3.424376 |  |
| 15877 | Malignant Neoplasms | COBL       | 0.000144 | -3.413096 |  |
| 15878 | Malignant Neoplasms | AKAP10     | 0.003047 | -3.41148  |  |
| 15879 | Malignant Neoplasms | LIMA1      | 0.003047 | -3.393403 |  |
| 15880 | Malignant Neoplasms | EHHADH     | 0.004243 | -3.390529 |  |
| 15881 | Malignant Neoplasms | UGT1A8     | 0        | -3.380884 |  |
| 15882 | Malignant Neoplasms | FLJ23867   | 0.000215 | -3.375153 |  |
| 15883 | Malignant Neoplasms | PGAP1      | 0.001395 | -3.368329 |  |
| 15884 | Malignant Neoplasms | RAP1GAP    | 0.004544 | -3.366309 |  |
| 15885 | Malignant Neoplasms | RNFT1      | 0.000382 | -3.361638 |  |
| 15886 | Malignant Neoplasms | GPR143     | 0.000254 | -3.356835 |  |
| 15887 | Malignant Neoplasms | KIAA1324   | 0.00219  | -3.346923 |  |
| 15888 | Malignant Neoplasms | MGC21881   | 0.004483 | -3.345753 |  |
| 15889 | Malignant Neoplasms | AHI1       | 0.000064 | -3.345557 |  |
| 15890 | Malignant Neoplasms | CDH13      | 0.000647 | -3.335462 |  |
| 15891 | Malignant Neoplasms | MGLL       | 0        | -3.330854 |  |
| 15892 | Malignant Neoplasms | SBF2       | 0.000987 | -3.325026 |  |
| 15893 | Malignant Neoplasms | ENOSF1     | 0.000324 | -3.307115 |  |
| 15894 | Malignant Neoplasms | ATP8B1     | 0.001005 | -3.299743 |  |
| 15895 | Malignant Neoplasms | NAB1       | 0.001404 | -3.298022 |  |
| 15896 | Malignant Neoplasms | TTRAP      | 0        | -3.297063 |  |
| 15897 | Malignant Neoplasms | CAPN5      | 0.00049  | -3.289094 |  |
| 15898 | Malignant Neoplasms | SLC44A1    | 0.000488 | -3.283266 |  |

|       |                     |              |          |           |  |
|-------|---------------------|--------------|----------|-----------|--|
| 15899 | Malignant Neoplasms | PRORS1P      | 0.000953 | -3.274898 |  |
| 15900 | Malignant Neoplasms | SLC22A23     | 0.000488 | -3.272734 |  |
| 15901 | Malignant Neoplasms | LOC147645    | 0.000007 | -3.257132 |  |
| 15902 | Malignant Neoplasms | ZNF649       | 0.000432 | -3.256486 |  |
| 15903 | Malignant Neoplasms | LOC100289632 | 0.002906 | -3.25408  |  |
| 15904 | Malignant Neoplasms | CHD9         | 0.000795 | -3.253819 |  |
| 15905 | Malignant Neoplasms | INTS10       | 0.000126 | -3.245618 |  |
| 15906 | Malignant Neoplasms | SLC35A1      | 0.000136 | -3.233704 |  |
| 15907 | Malignant Neoplasms | ZCCHC7       | 0.000295 | -3.231801 |  |
| 15908 | Malignant Neoplasms | MPP6         | 0.000836 | -3.214355 |  |
| 15909 | Malignant Neoplasms | SIPA1L2      | 0.004857 | -3.210274 |  |
| 15910 | Malignant Neoplasms | KIAA1370     | 0.002922 | -3.207262 |  |
| 15911 | Malignant Neoplasms | GNAQ         | 0.001906 | -3.202496 |  |
| 15912 | Malignant Neoplasms | LMLN         | 0.000596 | -3.201008 |  |
| 15913 | Malignant Neoplasms | ZNF557       | 0.000119 | -3.195714 |  |
| 15914 | Malignant Neoplasms | SCARA3       | 0.000667 | -3.187921 |  |
| 15915 | Malignant Neoplasms | RBKS         | 0.000067 | -3.187384 |  |
| 15916 | Malignant Neoplasms | PLEKHH1      | 0.001405 | -3.180597 |  |
| 15917 | Malignant Neoplasms | KIF13A       | 0.000802 | -3.177314 |  |
| 15918 | Malignant Neoplasms | ALDH6A1      | 0.002957 | -3.169574 |  |
| 15919 | Malignant Neoplasms | FBXW2        | 0.000316 | -3.154812 |  |
| 15920 | Malignant Neoplasms | KLHL15       | 0.000521 | -3.15467  |  |
| 15921 | Malignant Neoplasms | PPP1R12B     | 0.003424 | -3.145353 |  |
| 15922 | Malignant Neoplasms | LEAP2        | 0.000488 | -3.125762 |  |
| 15923 | Malignant Neoplasms | ADH1B        | 0        | -3.123674 |  |
| 15924 | Malignant Neoplasms | MEIS3P1      | 0.002861 | -3.102961 |  |
| 15925 | Malignant Neoplasms | TET2         | 0.00293  | -3.096987 |  |
| 15926 | Malignant Neoplasms | SPARCL1      | 0.000004 | -3.096174 |  |
| 15927 | Malignant Neoplasms | CMAS         | 0.000711 | -3.085735 |  |
| 15928 | Malignant Neoplasms | TFF3         | 0.004638 | -3.069182 |  |
| 15929 | Malignant Neoplasms | SELENBP1     | 0.000071 | -3.066158 |  |
| 15930 | Malignant Neoplasms | C2orf72      | 0.002451 | -3.066078 |  |
| 15931 | Malignant Neoplasms | LOC440396    | 0.000355 | -3.064023 |  |
| 15932 | Malignant Neoplasms | C4orf19      | 0.001296 | -3.063415 |  |
| 15933 | Malignant Neoplasms | SH2B2        | 0.000475 | -3.059526 |  |
| 15934 | Malignant Neoplasms | PCSK5        | 0.000459 | -3.056948 |  |
| 15935 | Malignant Neoplasms | LOC644538    | 0.000716 | -3.055062 |  |
| 15936 | Malignant Neoplasms | SLC48A1      | 0.00029  | -3.040614 |  |
| 15937 | Malignant Neoplasms | RECK         | 0.00073  | -3.030721 |  |
| 15938 | Malignant Neoplasms | SPATA7       | 0.000389 | -3.028222 |  |
| 15939 | Malignant Neoplasms | DARC         | 0.000001 | -3.028116 |  |
| 15940 | Malignant Neoplasms | VIP          | 0.000001 | -3.019982 |  |
| 15941 | Malignant Neoplasms | SR140        | 0.003805 | -3.019369 |  |
| 15942 | Malignant Neoplasms | SCAPER       | 0.004247 | -3.017734 |  |
| 15943 | Malignant Neoplasms | RNU12        | 0.000261 | -3.00526  |  |
| 15944 | Malignant Neoplasms | GSTM2        | 0        | -3.003643 |  |
| 15945 | Malignant Neoplasms | AKR1B10      | 0.000698 | -3.002267 |  |
| 15946 | Malignant Neoplasms | PIGH         | 0.000162 | -2.993498 |  |
| 15947 | Malignant Neoplasms | LOC400573    | 0.001278 | -2.984874 |  |
| 15948 | Malignant Neoplasms | ACACB        | 0.004517 | -2.983934 |  |

|       |                     |              |          |           |  |
|-------|---------------------|--------------|----------|-----------|--|
| 15949 | Malignant Neoplasms | ARL14        | 0        | -2.982007 |  |
| 15950 | Malignant Neoplasms | DTWD1        | 0.004638 | -2.969544 |  |
| 15951 | Malignant Neoplasms | C3orf38      | 0.00036  | -2.968622 |  |
| 15952 | Malignant Neoplasms | NRIP3        | 0.000409 | -2.958991 |  |
| 15953 | Malignant Neoplasms | SPTLC3       | 0        | -2.945247 |  |
| 15954 | Malignant Neoplasms | MON2         | 0.000711 | -2.938999 |  |
| 15955 | Malignant Neoplasms | FAM48A       | 0.002854 | -2.936586 |  |
| 15956 | Malignant Neoplasms | DOCK11       | 0.000595 | -2.924051 |  |
| 15957 | Malignant Neoplasms | APOO         | 0.000091 | -2.909463 |  |
| 15958 | Malignant Neoplasms | VMD2L1       | 0.000134 | -2.885943 |  |
| 15959 | Malignant Neoplasms | C17orf45     | 0.000282 | -2.883876 |  |
| 15960 | Malignant Neoplasms | CEP70        | 0.001068 | -2.88124  |  |
| 15961 | Malignant Neoplasms | CWF19L2      | 0.003589 | -2.85482  |  |
| 15962 | Malignant Neoplasms | FGD4         | 0.000358 | -2.846781 |  |
| 15963 | Malignant Neoplasms | MID1IP1      | 0.00003  | -2.824787 |  |
| 15964 | Malignant Neoplasms | RBM25        | 0.000802 | -2.822374 |  |
| 15965 | Malignant Neoplasms | HSBP1L1      | 0.000488 | -2.82191  |  |
| 15966 | Malignant Neoplasms | ZNF503       | 0.000874 | -2.82166  |  |
| 15967 | Malignant Neoplasms | ABCC3        | 0.002833 | -2.821428 |  |
| 15968 | Malignant Neoplasms | PPP2R3A      | 0.003288 | -2.821136 |  |
| 15969 | Malignant Neoplasms | GPA33        | 0.000665 | -2.816748 |  |
| 15970 | Malignant Neoplasms | RNASE4       | 0.000488 | -2.815054 |  |
| 15971 | Malignant Neoplasms | RMND1        | 0.000507 | -2.81366  |  |
| 15972 | Malignant Neoplasms | PLCD1        | 0.004517 | -2.809502 |  |
| 15973 | Malignant Neoplasms | SULT1A3      | 0.003634 | -2.807614 |  |
| 15974 | Malignant Neoplasms | VWF          | 0.000708 | -2.797215 |  |
| 15975 | Malignant Neoplasms | SAHH3        | 0.000006 | -2.796622 |  |
| 15976 | Malignant Neoplasms | ZNF18        | 0.000381 | -2.794412 |  |
| 15977 | Malignant Neoplasms | LYST         | 0.000207 | -2.788893 |  |
| 15978 | Malignant Neoplasms | LOC100128893 | 0.004141 | -2.787412 |  |
| 15979 | Malignant Neoplasms | RPGR         | 0.000351 | -2.783919 |  |
| 15980 | Malignant Neoplasms | CPEB3        | 0.005131 | -2.761783 |  |
| 15981 | Malignant Neoplasms | C14orf100    | 0.000237 | -2.7582   |  |
| 15982 | Malignant Neoplasms | EXPH5        | 0.000446 | -2.756191 |  |
| 15983 | Malignant Neoplasms | LOC100506168 | 0.003101 | -2.737855 |  |
| 15984 | Malignant Neoplasms | TNFRSF10D    | 0.00281  | -2.734711 |  |
| 15985 | Malignant Neoplasms | GK           | 0.000255 | -2.719562 |  |
| 15986 | Malignant Neoplasms | MRPL34       | 0.000218 | -2.717989 |  |
| 15987 | Malignant Neoplasms | HSD11B2      | 0.000411 | -2.707869 |  |
| 15988 | Malignant Neoplasms | SGSM3        | 0.002619 | -2.702811 |  |
| 15989 | Malignant Neoplasms | LOC100506493 | 0.005131 | -2.692526 |  |
| 15990 | Malignant Neoplasms | NHSL1        | 0.002223 | -2.69232  |  |
| 15991 | Malignant Neoplasms | ATP8A1       | 0        | -2.689517 |  |
| 15992 | Malignant Neoplasms | SMCR7L       | 0.0001   | -2.68474  |  |
| 15993 | Malignant Neoplasms | PCLO         | 0.003424 | -2.682969 |  |
| 15994 | Malignant Neoplasms | ZNF253       | 0.000647 | -2.681512 |  |
| 15995 | Malignant Neoplasms | LOC342918    | 0.031445 | -2.676083 |  |
| 15996 | Malignant Neoplasms | NEDD4L       | 0.00332  | -2.675522 |  |
| 15997 | Malignant Neoplasms | TRUB1        | 0.016286 | -2.67491  |  |
| 15998 | Malignant Neoplasms | DIRC1        | 0.000377 | -2.673842 |  |

|       |                     |           |          |           |  |
|-------|---------------------|-----------|----------|-----------|--|
| 15999 | Malignant Neoplasms | KRT74     | 0.000317 | -2.670621 |  |
| 16000 | Malignant Neoplasms | TPT1      | 0.004857 | -2.663384 |  |
| 16001 | Malignant Neoplasms | FARP2     | 0.000187 | -2.66268  |  |
| 16002 | Malignant Neoplasms | PAIP2B    | 0.000487 | -2.655846 |  |
| 16003 | Malignant Neoplasms | TMTC4     | 0.000482 | -2.654245 |  |
| 16004 | Malignant Neoplasms | GPATCH2   | 0.003649 | -2.652061 |  |
| 16005 | Malignant Neoplasms | SPON1     | 0.000432 | -2.646048 |  |
| 16006 | Malignant Neoplasms | HIST1H4B  | 0.000509 | -2.626881 |  |
| 16007 | Malignant Neoplasms | PRDX4     | 0.000167 | -2.617971 |  |
| 16008 | Malignant Neoplasms | MED21     | 0.000088 | -2.616987 |  |
| 16009 | Malignant Neoplasms | CCL13     | 0.000261 | -2.615183 |  |
| 16010 | Malignant Neoplasms | C10orf54  | 0.003149 | -2.612426 |  |
| 16011 | Malignant Neoplasms | CPA3      | 0        | -2.60624  |  |
| 16012 | Malignant Neoplasms | NAPEPLD   | 0.001781 | -2.604727 |  |
| 16013 | Malignant Neoplasms | SMCHD1    | 0.003343 | -2.585213 |  |
| 16014 | Malignant Neoplasms | CCDC84    | 0.000425 | -2.584065 |  |
| 16015 | Malignant Neoplasms | ZNF409    | 0.000143 | -2.582499 |  |
| 16016 | Malignant Neoplasms | SRSF1     | 0.000679 | -2.574245 |  |
| 16017 | Malignant Neoplasms | 6-Sep     | 0.000085 | -2.570746 |  |
| 16018 | Malignant Neoplasms | PTTG1IP   | 0.000102 | -2.565068 |  |
| 16019 | Malignant Neoplasms | TDP1      | 0.000402 | -2.556651 |  |
| 16020 | Malignant Neoplasms | LIN52     | 0.000061 | -2.555914 |  |
| 16021 | Malignant Neoplasms | EPB41L4B  | 0.000062 | -2.549991 |  |
| 16022 | Malignant Neoplasms | MGC13057  | 0        | -2.547698 |  |
| 16023 | Malignant Neoplasms | LOC344967 | 0.000492 | -2.544458 |  |
| 16024 | Malignant Neoplasms | C21orf70  | 0.000584 | -2.536377 |  |
| 16025 | Malignant Neoplasms | HSD17B11  | 0.0001   | -2.534032 |  |
| 16026 | Malignant Neoplasms | PIGN      | 0.001057 | -2.524512 |  |
| 16027 | Malignant Neoplasms | PALLD     | 0.000893 | -2.519625 |  |
| 16028 | Malignant Neoplasms | PROSC     | 0.000647 | -2.51818  |  |
| 16029 | Malignant Neoplasms | CCDC112   | 0.001371 | -2.515317 |  |
| 16030 | Malignant Neoplasms | ZSWIM6    | 0.003636 | -2.505999 |  |
| 16031 | Malignant Neoplasms | LOC727995 | 0        | -2.505991 |  |
| 16032 | Malignant Neoplasms | CASD1     | 0.004245 | -2.501637 |  |
| 16033 | Malignant Neoplasms | ACOT7     | 0.000402 | -2.498078 |  |
| 16034 | Malignant Neoplasms | SDCBP2    | 0.000331 | -2.495947 |  |
| 16035 | Malignant Neoplasms | FUBP1     | 0.000607 | -2.495646 |  |
| 16036 | Malignant Neoplasms | RNASEL    | 0.004644 | -2.494672 |  |
| 16037 | Malignant Neoplasms | C12orf57  | 0.000424 | -2.492894 |  |
| 16038 | Malignant Neoplasms | MYOF      | 0.003778 | -2.488286 |  |
| 16039 | Malignant Neoplasms | PLD1      | 0.0037   | -2.482875 |  |
| 16040 | Malignant Neoplasms | AMY2B     | 0.004544 | -2.481498 |  |
| 16041 | Malignant Neoplasms | C6orf35   | 0.000428 | -2.480078 |  |
| 16042 | Malignant Neoplasms | PDE9A     | 0        | -2.477127 |  |
| 16043 | Malignant Neoplasms | TMEM30B   | 0.000555 | -2.470234 |  |
| 16044 | Malignant Neoplasms | SLCO2A1   | 0.000002 | -2.469144 |  |
| 16045 | Malignant Neoplasms | CAMK2D    | 0.000541 | -2.468768 |  |
| 16046 | Malignant Neoplasms | LYRM5     | 0.000254 | -2.45771  |  |
| 16047 | Malignant Neoplasms | COL6A3    | 0.000433 | -2.45215  |  |
| 16048 | Malignant Neoplasms | AP4B1     | 0.000582 | -2.447063 |  |

|       |                     |              |          |           |  |
|-------|---------------------|--------------|----------|-----------|--|
| 16049 | Malignant Neoplasms | ASTN2        | 0.000389 | -2.440821 |  |
| 16050 | Malignant Neoplasms | EIF3L        | 0.000268 | -2.438209 |  |
| 16051 | Malignant Neoplasms | MEGF9        | 0.000161 | -2.437944 |  |
| 16052 | Malignant Neoplasms | FOXF1        | 0        | -2.435512 |  |
| 16053 | Malignant Neoplasms | CD74         | 0.037564 | -2.433393 |  |
| 16054 | Malignant Neoplasms | LOC643220    | 0.000286 | -2.425949 |  |
| 16055 | Malignant Neoplasms | UGP2         | 0        | -2.425445 |  |
| 16056 | Malignant Neoplasms | MYO1C        | 0.003288 | -2.416458 |  |
| 16057 | Malignant Neoplasms | PDSS2        | 0.00044  | -2.412645 |  |
| 16058 | Malignant Neoplasms | RBBP4        | 0.004235 | -2.412335 |  |
| 16059 | Malignant Neoplasms | NGDN         | 0.000014 | -2.40989  |  |
| 16060 | Malignant Neoplasms | MRPS22       | 0.000675 | -2.404713 |  |
| 16061 | Malignant Neoplasms | VDAC1        | 0.00036  | -2.403048 |  |
| 16062 | Malignant Neoplasms | GLTP         | 0.00293  | -2.401717 |  |
| 16063 | Malignant Neoplasms | STXBP1       | 0.000521 | -2.400944 |  |
| 16064 | Malignant Neoplasms | MR1          | 0.000082 | -2.400894 |  |
| 16065 | Malignant Neoplasms | CYB5D1       | 0.000471 | -2.396127 |  |
| 16066 | Malignant Neoplasms | CRYZL1       | 0.004152 | -2.394317 |  |
| 16067 | Malignant Neoplasms | TLE3         | 0.000159 | -2.393145 |  |
| 16068 | Malignant Neoplasms | SYTL4        | 0.001604 | -2.391109 |  |
| 16069 | Malignant Neoplasms | EIF4B        | 0.00033  | -2.387684 |  |
| 16070 | Malignant Neoplasms | TNRC6B       | 0.000456 | -2.383205 |  |
| 16071 | Malignant Neoplasms | ASAH1        | 0        | -2.379442 |  |
| 16072 | Malignant Neoplasms | KIAA1109     | 0.003038 | -2.378572 |  |
| 16073 | Malignant Neoplasms | LOC253264    | 0.000346 | -2.373921 |  |
| 16074 | Malignant Neoplasms | COPZ1        | 0.000413 | -2.373177 |  |
| 16075 | Malignant Neoplasms | PGM5         | 0.000314 | -2.364494 |  |
| 16076 | Malignant Neoplasms | C14orf126    | 0.000242 | -2.350964 |  |
| 16077 | Malignant Neoplasms | BAP1         | 0.000656 | -2.348392 |  |
| 16078 | Malignant Neoplasms | WDR7         | 0.005167 | -2.346086 |  |
| 16079 | Malignant Neoplasms | DENND1A      | 0.000355 | -2.342864 |  |
| 16080 | Malignant Neoplasms | DENND5A      | 0.000471 | -2.338272 |  |
| 16081 | Malignant Neoplasms | ATG4A        | 0.000394 | -2.333514 |  |
| 16082 | Malignant Neoplasms | SCARA5       | 0.000025 | -2.332101 |  |
| 16083 | Malignant Neoplasms | PAPSS2       | 0.004629 | -2.332038 |  |
| 16084 | Malignant Neoplasms | FAM162A      | 0.00025  | -2.33122  |  |
| 16085 | Malignant Neoplasms | CCDC14       | 0.00051  | -2.328058 |  |
| 16086 | Malignant Neoplasms | MAFB         | 0.00033  | -2.314435 |  |
| 16087 | Malignant Neoplasms | RABGAP1L     | 0.003737 | -2.314043 |  |
| 16088 | Malignant Neoplasms | ZNF318       | 0.000124 | -2.312317 |  |
| 16089 | Malignant Neoplasms | PRKAR2A      | 0.000647 | -2.305946 |  |
| 16090 | Malignant Neoplasms | KLRG2        | 0.000491 | -2.281182 |  |
| 16091 | Malignant Neoplasms | ACO2         | 0.000234 | -2.277367 |  |
| 16092 | Malignant Neoplasms | PPP2R1B      | 0.000649 | -2.273801 |  |
| 16093 | Malignant Neoplasms | C15orf48     | 0.000105 | -2.264361 |  |
| 16094 | Malignant Neoplasms | EFCAB4B      | 0.004437 | -2.264241 |  |
| 16095 | Malignant Neoplasms | TSPAN13      | 0.002922 | -2.261416 |  |
| 16096 | Malignant Neoplasms | AGXT2L2      | 0.00293  | -2.258722 |  |
| 16097 | Malignant Neoplasms | LOC100190939 | 0.000113 | -2.258036 |  |
| 16098 | Malignant Neoplasms | CDS2         | 0.000258 | -2.256708 |  |

|       |                     |           |          |           |  |
|-------|---------------------|-----------|----------|-----------|--|
| 16099 | Malignant Neoplasms | LOC120364 | 0.000424 | -2.256464 |  |
| 16100 | Malignant Neoplasms | IMPDH2    | 0.000492 | -2.256004 |  |
| 16101 | Malignant Neoplasms | MAB21L2   | 0.000009 | -2.254028 |  |
| 16102 | Malignant Neoplasms | RABEP1    | 0.000647 | -2.25188  |  |
| 16103 | Malignant Neoplasms | NKTR      | 0.002223 | -2.246367 |  |
| 16104 | Malignant Neoplasms | MS4A8B    | 0.000135 | -2.245197 |  |
| 16105 | Malignant Neoplasms | EYA3      | 0.046824 | -2.232375 |  |
| 16106 | Malignant Neoplasms | FGL2      | 0        | -2.227979 |  |
| 16107 | Malignant Neoplasms | CMC1      | 0.000309 | -2.22477  |  |
| 16108 | Malignant Neoplasms | ARID1B    | 0.000099 | -2.221163 |  |
| 16109 | Malignant Neoplasms | IKBKE     | 0.000573 | -2.219915 |  |
| 16110 | Malignant Neoplasms | ZFYVE1    | 0.000278 | -2.219254 |  |
| 16111 | Malignant Neoplasms | RGMA      | 0.000001 | -2.216106 |  |
| 16112 | Malignant Neoplasms | FAM161B   | 0.00488  | -2.207343 |  |
| 16113 | Malignant Neoplasms | ANK3      | 0        | -2.197682 |  |
| 16114 | Malignant Neoplasms | TMIGD     | 0.000335 | -2.196593 |  |
| 16115 | Malignant Neoplasms | C8orf83   | 0.001854 | -2.182153 |  |
| 16116 | Malignant Neoplasms | C9orf91   | 0.000268 | -2.17898  |  |
| 16117 | Malignant Neoplasms | E2F2      | 0.000521 | -2.175628 |  |
| 16118 | Malignant Neoplasms | TCF21     | 0        | -2.173875 |  |
| 16119 | Malignant Neoplasms | DNAJC4    | 0.002861 | -2.171379 |  |
| 16120 | Malignant Neoplasms | ANKRD36   | 0.005131 | -2.167662 |  |
| 16121 | Malignant Neoplasms | PPAP2A    | 0        | -2.166829 |  |
| 16122 | Malignant Neoplasms | PRDX6     | 0        | -2.159598 |  |
| 16123 | Malignant Neoplasms | CTSG      | 0.000001 | -2.15913  |  |
| 16124 | Malignant Neoplasms | TTLL3     | 0.000297 | -2.156659 |  |
| 16125 | Malignant Neoplasms | TSPAN7    | 0.000705 | -2.148268 |  |
| 16126 | Malignant Neoplasms | TMEM54    | 0.000211 | -2.141421 |  |
| 16127 | Malignant Neoplasms | NSMAF     | 0.000255 | -2.133912 |  |
| 16128 | Malignant Neoplasms | PDXP      | 0.000006 | -2.13219  |  |
| 16129 | Malignant Neoplasms | Q8NBX4    | 0.000102 | -2.127648 |  |
| 16130 | Malignant Neoplasms | SDCCAG1   | 0.00091  | -2.126706 |  |
| 16131 | Malignant Neoplasms | ZNF252    | 0.002619 | -2.12491  |  |
| 16132 | Malignant Neoplasms | FAM200A   | 0.003763 | -2.122202 |  |
| 16133 | Malignant Neoplasms | NSG1      | 0        | -2.121418 |  |
| 16134 | Malignant Neoplasms | RHAG      | 0.046824 | -2.120604 |  |
| 16135 | Malignant Neoplasms | NAGK      | 0.00063  | -2.11225  |  |
| 16136 | Malignant Neoplasms | FUCA1     | 0        | -2.108848 |  |
| 16137 | Malignant Neoplasms | PLAT      | 0.000028 | -2.107739 |  |
| 16138 | Malignant Neoplasms | UNC5B     | 0.003512 | -2.103171 |  |
| 16139 | Malignant Neoplasms | FAM125A   | 0.000355 | -2.102634 |  |
| 16140 | Malignant Neoplasms | UQCRC1    | 0.000011 | -2.101209 |  |
| 16141 | Malignant Neoplasms | ACAA1     | 0.000802 | -2.099543 |  |
| 16142 | Malignant Neoplasms | EPCAM     | 0.005086 | -2.095787 |  |
| 16143 | Malignant Neoplasms | NEUROG3   | 0.000017 | -2.095584 |  |
| 16144 | Malignant Neoplasms | LOC284454 | 0.004125 | -2.081457 |  |
| 16145 | Malignant Neoplasms | ECHDC2    | 0.004558 | -2.078043 |  |
| 16146 | Malignant Neoplasms | C1QBP     | 0.000283 | -2.075906 |  |
| 16147 | Malignant Neoplasms | C14orf49  | 0.000647 | -2.074229 |  |
| 16148 | Malignant Neoplasms | ADSV      | 0.000576 | -2.070961 |  |

|       |                     |           |          |           |  |
|-------|---------------------|-----------|----------|-----------|--|
| 16149 | Malignant Neoplasms | CD79A     | 0.000427 | -2.069078 |  |
| 16150 | Malignant Neoplasms | TIMM44    | 0.000024 | -2.066057 |  |
| 16151 | Malignant Neoplasms | LOC653198 | 0        | -2.059828 |  |
| 16152 | Malignant Neoplasms | SYNJ2BP   | 0.000369 | -2.059174 |  |
| 16153 | Malignant Neoplasms | TMSB10    | 0.000217 | -2.0569   |  |
| 16154 | Malignant Neoplasms | VPS13D    | 0.003805 | -2.055066 |  |
| 16155 | Malignant Neoplasms | ARF3      | 0.000391 | -2.054823 |  |
| 16156 | Malignant Neoplasms | C17orf85  | 0.000326 | -2.043168 |  |
| 16157 | Malignant Neoplasms | RNMTL1    | 0.000277 | -2.043078 |  |
| 16158 | Malignant Neoplasms | PPP1R13B  | 0.004557 | -2.039713 |  |
| 16159 | Malignant Neoplasms | LOC148709 | 0.000354 | -2.03822  |  |
| 16160 | Malignant Neoplasms | GRIN1     | 0.001189 | -2.033231 |  |
| 16161 | Malignant Neoplasms | CNTROB    | 0.000316 | -2.030106 |  |
| 16162 | Malignant Neoplasms | MTHFD2L   | 0.004857 | -2.02129  |  |
| 16163 | Malignant Neoplasms | SF3B5     | 0.000414 | -2.006777 |  |
| 16164 | Malignant Neoplasms | MALL      | 0.00058  | -2.001755 |  |
| 16165 | Malignant Neoplasms | CYP2R1    | 0.001404 | -2.000093 |  |
| 16166 | Malignant Neoplasms | CBX3      | 0.000002 | 2.001406  |  |
| 16167 | Malignant Neoplasms | ZMYND19   | 0        | 2.00155   |  |
| 16168 | Malignant Neoplasms | LASP1     | 0.000001 | 2.002258  |  |
| 16169 | Malignant Neoplasms | EHBP1L1   | 0.000208 | 2.003314  |  |
| 16170 | Malignant Neoplasms | CTNND1    | 0.000737 | 2.007598  |  |
| 16171 | Malignant Neoplasms | LONP1     | 0        | 2.008715  |  |
| 16172 | Malignant Neoplasms | RGS12     | 0        | 2.009921  |  |
| 16173 | Malignant Neoplasms | MTA2      | 0.000001 | 2.010076  |  |
| 16174 | Malignant Neoplasms | GRINA     | 0.000204 | 2.011493  |  |
| 16175 | Malignant Neoplasms | AAA1      | 0        | 2.01351   |  |
| 16176 | Malignant Neoplasms | KIF15     | 0        | 2.015372  |  |
| 16177 | Malignant Neoplasms | GOLT1B    | 0        | 2.015554  |  |
| 16178 | Malignant Neoplasms | RIPK2     | 0        | 2.016821  |  |
| 16179 | Malignant Neoplasms | MTERFD1   | 0.000001 | 2.018794  |  |
| 16180 | Malignant Neoplasms | KIF11     | 0.000001 | 2.025286  |  |
| 16181 | Malignant Neoplasms | NUP107    | 0        | 2.028406  |  |
| 16182 | Malignant Neoplasms | CCDC59    | 0        | 2.030633  |  |
| 16183 | Malignant Neoplasms | PSD2      | 0        | 2.036907  |  |
| 16184 | Malignant Neoplasms | GPR56     | 0        | 2.037559  |  |
| 16185 | Malignant Neoplasms | LOC730286 | 0.000146 | 2.042263  |  |
| 16186 | Malignant Neoplasms | MICALL1   | 0.000242 | 2.04526   |  |
| 16187 | Malignant Neoplasms | LOC728769 | 0.000371 | 2.047471  |  |
| 16188 | Malignant Neoplasms | TIMELESS  | 0        | 2.051896  |  |
| 16189 | Malignant Neoplasms | PHF11     | 0.001695 | 2.062975  |  |
| 16190 | Malignant Neoplasms | TMEM91    | 0        | 2.063926  |  |
| 16191 | Malignant Neoplasms | OIP5      | 0.000001 | 2.065998  |  |
| 16192 | Malignant Neoplasms | KDM2B     | 0.004141 | 2.06911   |  |
| 16193 | Malignant Neoplasms | NUP205    | 0.000001 | 2.074642  |  |
| 16194 | Malignant Neoplasms | ADCK4     | 0        | 2.081367  |  |
| 16195 | Malignant Neoplasms | LOC647000 | 0        | 2.081938  |  |
| 16196 | Malignant Neoplasms | QPCTL     | 0        | 2.085368  |  |
| 16197 | Malignant Neoplasms | BPI       | 0        | 2.085919  |  |
| 16198 | Malignant Neoplasms | MFSD10    | 0        | 2.087086  |  |

|       |                     |           |          |          |  |
|-------|---------------------|-----------|----------|----------|--|
| 16199 | Malignant Neoplasms | NDE1      | 0        | 2.09224  |  |
| 16200 | Malignant Neoplasms | RFC5      | 0.000001 | 2.096438 |  |
| 16201 | Malignant Neoplasms | EPPK1     | 0.000001 | 2.101393 |  |
| 16202 | Malignant Neoplasms | IGFBP7    | 0        | 2.103439 |  |
| 16203 | Malignant Neoplasms | NOC2L     | 0.026594 | 2.104099 |  |
| 16204 | Malignant Neoplasms | L3MBTL2   | 0        | 2.106203 |  |
| 16205 | Malignant Neoplasms | C20orf132 | 0        | 2.106547 |  |
| 16206 | Malignant Neoplasms | PSMA1     | 0.004439 | 2.107412 |  |
| 16207 | Malignant Neoplasms | SLC35A3   | 0.000202 | 2.107679 |  |
| 16208 | Malignant Neoplasms | CXorf40B  | 0.000486 | 2.111282 |  |
| 16209 | Malignant Neoplasms | MORC4     | 0.004279 | 2.112565 |  |
| 16210 | Malignant Neoplasms | SLC25A32  | 0.000001 | 2.113102 |  |
| 16211 | Malignant Neoplasms | GINS2     | 0.000001 | 2.11675  |  |
| 16212 | Malignant Neoplasms | NUP85     | 0.000001 | 2.11777  |  |
| 16213 | Malignant Neoplasms | C1orf107  | 0.002301 | 2.118563 |  |
| 16214 | Malignant Neoplasms | RBM28     | 0        | 2.120363 |  |
| 16215 | Malignant Neoplasms | COL18A1   | 0        | 2.120507 |  |
| 16216 | Malignant Neoplasms | SPOPL     | 0.00026  | 2.120846 |  |
| 16217 | Malignant Neoplasms | NCAPG2    | 0        | 2.125408 |  |
| 16218 | Malignant Neoplasms | FCHSD1    | 0        | 2.126384 |  |
| 16219 | Malignant Neoplasms | CAD       | 0.000001 | 2.127343 |  |
| 16220 | Malignant Neoplasms | NAPRT1    | 0.000167 | 2.127462 |  |
| 16221 | Malignant Neoplasms | GTF2IRD1  | 0        | 2.133547 |  |
| 16222 | Malignant Neoplasms | TAZ       | 0.000143 | 2.133776 |  |
| 16223 | Malignant Neoplasms | FANCL     | 0        | 2.139324 |  |
| 16224 | Malignant Neoplasms | GZMB      | 0        | 2.14732  |  |
| 16225 | Malignant Neoplasms | KIF2C     | 0.000001 | 2.154208 |  |
| 16226 | Malignant Neoplasms | OAS3      | 0.000001 | 2.155018 |  |
| 16227 | Malignant Neoplasms | TIE1      | 0        | 2.16211  |  |
| 16228 | Malignant Neoplasms | PORCN     | 0        | 2.162538 |  |
| 16229 | Malignant Neoplasms | LOC731275 | 0.000002 | 2.163543 |  |
| 16230 | Malignant Neoplasms | ANO3      | 0        | 2.166345 |  |
| 16231 | Malignant Neoplasms | LOC90835  | 0.001125 | 2.166442 |  |
| 16232 | Malignant Neoplasms | FANCG     | 0        | 2.166676 |  |
| 16233 | Malignant Neoplasms | CCL4      | 0        | 2.174968 |  |
| 16234 | Malignant Neoplasms | LOC401357 | 0        | 2.17545  |  |
| 16235 | Malignant Neoplasms | SFRS3     | 0.023214 | 2.178891 |  |
| 16236 | Malignant Neoplasms | PPIA      | 0        | 2.185152 |  |
| 16237 | Malignant Neoplasms | PCBP3     | 0        | 2.186495 |  |
| 16238 | Malignant Neoplasms | WDR33     | 0        | 2.186975 |  |
| 16239 | Malignant Neoplasms | SLC38A3   | 0        | 2.187399 |  |
| 16240 | Malignant Neoplasms | RAB15     | 0        | 2.188293 |  |
| 16241 | Malignant Neoplasms | MCM3      | 0        | 2.189712 |  |
| 16242 | Malignant Neoplasms | JAG2      | 0.000001 | 2.191192 |  |
| 16243 | Malignant Neoplasms | WDR43     | 0.000001 | 2.194866 |  |
| 16244 | Malignant Neoplasms | C10orf71  | 0        | 2.194946 |  |
| 16245 | Malignant Neoplasms | CSNK2B    | 0.000285 | 2.197823 |  |
| 16246 | Malignant Neoplasms | FAM29A    | 0        | 2.20299  |  |
| 16247 | Malignant Neoplasms | OLR1      | 0.000557 | 2.207088 |  |
| 16248 | Malignant Neoplasms | GTPBP5    | 0        | 2.213754 |  |



|       |                     |           |          |          |  |
|-------|---------------------|-----------|----------|----------|--|
| 16249 | Malignant Neoplasms | ARIH1     | 0.000605 | 2.21698  |  |
| 16250 | Malignant Neoplasms | HOXB6     | 0.022575 | 2.220702 |  |
| 16251 | Malignant Neoplasms | CLCN7     | 0        | 2.234566 |  |
| 16252 | Malignant Neoplasms | ITGB1     | 0.000252 | 2.23583  |  |
| 16253 | Malignant Neoplasms | EXOSC8    | 0.023557 | 2.246594 |  |
| 16254 | Malignant Neoplasms | KIF19     | 0        | 2.251696 |  |
| 16255 | Malignant Neoplasms | POLR1D    | 0.000001 | 2.252838 |  |
| 16256 | Malignant Neoplasms | PTCD1     | 0        | 2.255095 |  |
| 16257 | Malignant Neoplasms | KIAA1430  | 0.004953 | 2.262002 |  |
| 16258 | Malignant Neoplasms | NUP37     | 0.000001 | 2.262069 |  |
| 16259 | Malignant Neoplasms | AP1G1     | 0.000433 | 2.263637 |  |
| 16260 | Malignant Neoplasms | FAM3A     | 0.000237 | 2.271018 |  |
| 16261 | Malignant Neoplasms | COMT      | 0.0087   | 2.27312  |  |
| 16262 | Malignant Neoplasms | CCDC19    | 0.000041 | 2.280748 |  |
| 16263 | Malignant Neoplasms | CHD7      | 0.000445 | 2.281194 |  |
| 16264 | Malignant Neoplasms | CBX4      | 0        | 2.293435 |  |
| 16265 | Malignant Neoplasms | TMEM109   | 0        | 2.298206 |  |
| 16266 | Malignant Neoplasms | LOC731966 | 0        | 2.301043 |  |
| 16267 | Malignant Neoplasms | TPTE      | 0        | 2.301437 |  |
| 16268 | Malignant Neoplasms | SLC26A4   | 0        | 2.301524 |  |
| 16269 | Malignant Neoplasms | MYO1H     | 0        | 2.304578 |  |
| 16270 | Malignant Neoplasms | MICB      | 0        | 2.307009 |  |
| 16271 | Malignant Neoplasms | TNFRSF10A | 0        | 2.308232 |  |
| 16272 | Malignant Neoplasms | RASSF7    | 0.000148 | 2.313444 |  |
| 16273 | Malignant Neoplasms | F2R       | 0        | 2.3171   |  |
| 16274 | Malignant Neoplasms | BHLHE22   | 0        | 2.322857 |  |
| 16275 | Malignant Neoplasms | DARS2     | 0.003721 | 2.328628 |  |
| 16276 | Malignant Neoplasms | HS2ST1    | 0.000002 | 2.328743 |  |
| 16277 | Malignant Neoplasms | CECR2     | 0        | 2.332804 |  |
| 16278 | Malignant Neoplasms | SOX9      | 0        | 2.336502 |  |
| 16279 | Malignant Neoplasms | CKS2      | 0        | 2.34218  |  |
| 16280 | Malignant Neoplasms | KIAA1881  | 0.000237 | 2.349848 |  |
| 16281 | Malignant Neoplasms | POLN      | 0        | 2.353199 |  |
| 16282 | Malignant Neoplasms | USH2A     | 0        | 2.355116 |  |
| 16283 | Malignant Neoplasms | NRK       | 0        | 2.357796 |  |
| 16284 | Malignant Neoplasms | ORAI2     | 0.000355 | 2.368232 |  |
| 16285 | Malignant Neoplasms | DOK1      | 0        | 2.368591 |  |
| 16286 | Malignant Neoplasms | COL24A1   | 0        | 2.375741 |  |
| 16287 | Malignant Neoplasms | HEATR4    | 0        | 2.383003 |  |
| 16288 | Malignant Neoplasms | ERO1L     | 0        | 2.38391  |  |
| 16289 | Malignant Neoplasms | MRPS17    | 0.000001 | 2.391333 |  |
| 16290 | Malignant Neoplasms | KIF9      | 0        | 2.398162 |  |
| 16291 | Malignant Neoplasms | ZWILCH    | 0        | 2.403617 |  |
| 16292 | Malignant Neoplasms | CDH26     | 0        | 2.404148 |  |
| 16293 | Malignant Neoplasms | JAKMIP2   | 0        | 2.406255 |  |
| 16294 | Malignant Neoplasms | AOC2      | 0        | 2.41181  |  |
| 16295 | Malignant Neoplasms | ITGAM     | 0        | 2.411873 |  |
| 16296 | Malignant Neoplasms | CSPP1     | 0.004279 | 2.417897 |  |
| 16297 | Malignant Neoplasms | ILF3      | 0.00296  | 2.417933 |  |
| 16298 | Malignant Neoplasms | RFX4      | 0        | 2.420886 |  |

|       |                     |          |          |          |  |
|-------|---------------------|----------|----------|----------|--|
| 16299 | Malignant Neoplasms | ADFP     | 0.00024  | 2.429958 |  |
| 16300 | Malignant Neoplasms | ANGPTL4  | 0.000173 | 2.440066 |  |
| 16301 | Malignant Neoplasms | TMEM184A | 0.000061 | 2.443268 |  |
| 16302 | Malignant Neoplasms | SP140    | 0.000246 | 2.444219 |  |
| 16303 | Malignant Neoplasms | MLLT6    | 0.000005 | 2.453535 |  |
| 16304 | Malignant Neoplasms | ADAMTSL2 | 0.000012 | 2.453786 |  |
| 16305 | Malignant Neoplasms | PSAT1    | 0.000001 | 2.45864  |  |
| 16306 | Malignant Neoplasms | NFE2L3   | 0        | 2.463088 |  |
| 16307 | Malignant Neoplasms | CSE1L    | 0.000001 | 2.467005 |  |
| 16308 | Malignant Neoplasms | MAK      | 0        | 2.472108 |  |
| 16309 | Malignant Neoplasms | EYA1     | 0        | 2.472297 |  |
| 16310 | Malignant Neoplasms | ANKFN1   | 0        | 2.472601 |  |
| 16311 | Malignant Neoplasms | C12orf11 | 0        | 2.477935 |  |
| 16312 | Malignant Neoplasms | KRT39    | 0        | 2.480666 |  |
| 16313 | Malignant Neoplasms | FAM127A  | 0.000531 | 2.480875 |  |
| 16314 | Malignant Neoplasms | CARD11   | 0        | 2.480952 |  |
| 16315 | Malignant Neoplasms | PRDM8    | 0        | 2.481532 |  |
| 16316 | Malignant Neoplasms | PKD1L3   | 0        | 2.481772 |  |
| 16317 | Malignant Neoplasms | ZNF587   | 0.000704 | 2.482609 |  |
| 16318 | Malignant Neoplasms | CTPS     | 0        | 2.484479 |  |
| 16319 | Malignant Neoplasms | CA6      | 0        | 2.484544 |  |
| 16320 | Malignant Neoplasms | RPL35A   | 0.023557 | 2.488761 |  |
| 16321 | Malignant Neoplasms | ICAM1    | 0        | 2.498583 |  |
| 16322 | Malignant Neoplasms | IRAK1    | 0.000428 | 2.500215 |  |
| 16323 | Malignant Neoplasms | FBXO46   | 0.000685 | 2.505657 |  |
| 16324 | Malignant Neoplasms | GTF3A    | 0        | 2.514476 |  |
| 16325 | Malignant Neoplasms | IQCH     | 0        | 2.516142 |  |
| 16326 | Malignant Neoplasms | S100A11  | 0        | 2.517473 |  |
| 16327 | Malignant Neoplasms | S100A6   | 0.000473 | 2.524376 |  |
| 16328 | Malignant Neoplasms | YIPF3    | 0.000716 | 2.525645 |  |
| 16329 | Malignant Neoplasms | CYP1B1   | 0.000314 | 2.525663 |  |
| 16330 | Malignant Neoplasms | CCDC92   | 0.00358  | 2.52573  |  |
| 16331 | Malignant Neoplasms | GPRC5C   | 0.000292 | 2.527811 |  |
| 16332 | Malignant Neoplasms | PLD6     | 0.000062 | 2.530931 |  |
| 16333 | Malignant Neoplasms | FLJ22167 | 0        | 2.534436 |  |
| 16334 | Malignant Neoplasms | SLC7A6   | 0.005899 | 2.538138 |  |
| 16335 | Malignant Neoplasms | NPHP1    | 0        | 2.545304 |  |
| 16336 | Malignant Neoplasms | SLC7A1   | 0        | 2.546978 |  |
| 16337 | Malignant Neoplasms | CEP250   | 0        | 2.550342 |  |
| 16338 | Malignant Neoplasms | RAPGEF4  | 0        | 2.551132 |  |
| 16339 | Malignant Neoplasms | BCL6B    | 0        | 2.554916 |  |
| 16340 | Malignant Neoplasms | DCC      | 0        | 2.558436 |  |
| 16341 | Malignant Neoplasms | NALCN    | 0        | 2.560201 |  |
| 16342 | Malignant Neoplasms | MCM7     | 0        | 2.562626 |  |
| 16343 | Malignant Neoplasms | PSMB8    | 0.004857 | 2.5672   |  |
| 16344 | Malignant Neoplasms | UBE2L6   | 0.000001 | 2.570384 |  |
| 16345 | Malignant Neoplasms | TTC25    | 0        | 2.571125 |  |
| 16346 | Malignant Neoplasms | PSMG1    | 0.000001 | 2.572526 |  |
| 16347 | Malignant Neoplasms | TMEM14A  | 0.00296  | 2.575291 |  |
| 16348 | Malignant Neoplasms | EPS8L2   | 0.000233 | 2.589922 |  |

|       |                     |           |          |          |  |
|-------|---------------------|-----------|----------|----------|--|
| 16349 | Malignant Neoplasms | ABCA13    | 0        | 2.590263 |  |
| 16350 | Malignant Neoplasms | SFXN5     | 0.000297 | 2.594348 |  |
| 16351 | Malignant Neoplasms | CCBL1     | 0        | 2.59711  |  |
| 16352 | Malignant Neoplasms | CASS4     | 0        | 2.601324 |  |
| 16353 | Malignant Neoplasms | tcag7.907 | 0        | 2.602368 |  |
| 16354 | Malignant Neoplasms | PSAP      | 0.002393 | 2.610683 |  |
| 16355 | Malignant Neoplasms | CTNBNL1   | 0        | 2.612824 |  |
| 16356 | Malignant Neoplasms | NPVF      | 0        | 2.613849 |  |
| 16357 | Malignant Neoplasms | HEATR7A   | 0.000492 | 2.614327 |  |
| 16358 | Malignant Neoplasms | UBE2V1    | 0.004279 | 2.625998 |  |
| 16359 | Malignant Neoplasms | LITAF     | 0.000104 | 2.628143 |  |
| 16360 | Malignant Neoplasms | LIN7A     | 0        | 2.628195 |  |
| 16361 | Malignant Neoplasms | FAM176A   | 0        | 2.634253 |  |
| 16362 | Malignant Neoplasms | GLIPR1    | 0.000011 | 2.636184 |  |
| 16363 | Malignant Neoplasms | DHCR7     | 0        | 2.637916 |  |
| 16364 | Malignant Neoplasms | MMP13     | 0        | 2.64178  |  |
| 16365 | Malignant Neoplasms | FBXL13    | 0        | 2.642704 |  |
| 16366 | Malignant Neoplasms | LRRC57    | 0.000491 | 2.6482   |  |
| 16367 | Malignant Neoplasms | WDR31     | 0        | 2.648876 |  |
| 16368 | Malignant Neoplasms | TMEM161A  | 0        | 2.649004 |  |
| 16369 | Malignant Neoplasms | CCNA2     | 0.000001 | 2.6516   |  |
| 16370 | Malignant Neoplasms | PPM1F     | 0.001854 | 2.653937 |  |
| 16371 | Malignant Neoplasms | HN1L      | 0        | 2.666329 |  |
| 16372 | Malignant Neoplasms | ALDH4A1   | 0.000232 | 2.672146 |  |
| 16373 | Malignant Neoplasms | NEB       | 0        | 2.673266 |  |
| 16374 | Malignant Neoplasms | ZNF474    | 0        | 2.681025 |  |
| 16375 | Malignant Neoplasms | MSLN      | 0        | 2.690638 |  |
| 16376 | Malignant Neoplasms | BOP1      | 0        | 2.693284 |  |
| 16377 | Malignant Neoplasms | AP1S2     | 0.003236 | 2.693499 |  |
| 16378 | Malignant Neoplasms | CGNL1     | 0.000004 | 2.694607 |  |
| 16379 | Malignant Neoplasms | GBP1      | 0        | 2.698104 |  |
| 16380 | Malignant Neoplasms | CDC25B    | 0.000001 | 2.70041  |  |
| 16381 | Malignant Neoplasms | EIF2AK2   | 0.004176 | 2.716897 |  |
| 16382 | Malignant Neoplasms | RDH10     | 0.000327 | 2.736183 |  |
| 16383 | Malignant Neoplasms | AKT1S1    | 0.000204 | 2.736527 |  |
| 16384 | Malignant Neoplasms | XKRX      | 0        | 2.73967  |  |
| 16385 | Malignant Neoplasms | C21orf71  | 0.000014 | 2.746564 |  |
| 16386 | Malignant Neoplasms | NPC1L1    | 0        | 2.754101 |  |
| 16387 | Malignant Neoplasms | FEN1      | 0.000001 | 2.754245 |  |
| 16388 | Malignant Neoplasms | LOC647979 | 0.004217 | 2.755327 |  |
| 16389 | Malignant Neoplasms | CTSD      | 0.000072 | 2.758571 |  |
| 16390 | Malignant Neoplasms | PTPRU     | 0        | 2.768652 |  |
| 16391 | Malignant Neoplasms | ABCC2     | 0        | 2.78484  |  |
| 16392 | Malignant Neoplasms | MET       | 0        | 2.796537 |  |
| 16393 | Malignant Neoplasms | SEC24D    | 0.000433 | 2.806777 |  |
| 16394 | Malignant Neoplasms | NCOA3     | 0.003805 | 2.809919 |  |
| 16395 | Malignant Neoplasms | IFIH1     | 0.000647 | 2.81145  |  |
| 16396 | Malignant Neoplasms | MOBK12C   | 0.000413 | 2.821208 |  |
| 16397 | Malignant Neoplasms | CAMSAP1L1 | 0.002817 | 2.822373 |  |
| 16398 | Malignant Neoplasms | CLNK      | 0        | 2.822808 |  |

|       |                     |              |          |          |  |
|-------|---------------------|--------------|----------|----------|--|
| 16399 | Malignant Neoplasms | ADAMTS3      | 0        | 2.824047 |  |
| 16400 | Malignant Neoplasms | SLC9A3R2     | 0.000054 | 2.842996 |  |
| 16401 | Malignant Neoplasms | LGR5         | 0.000001 | 2.855969 |  |
| 16402 | Malignant Neoplasms | TAPBP        | 0.000001 | 2.856384 |  |
| 16403 | Malignant Neoplasms | LMNB2        | 0        | 2.858719 |  |
| 16404 | Malignant Neoplasms | SLC12A7      | 0.000647 | 2.86646  |  |
| 16405 | Malignant Neoplasms | NT5DC2       | 0        | 2.876001 |  |
| 16406 | Malignant Neoplasms | MCM8         | 0.004563 | 2.888232 |  |
| 16407 | Malignant Neoplasms | ENTPD4       | 0        | 2.89158  |  |
| 16408 | Malignant Neoplasms | IQCE         | 0.000359 | 2.901126 |  |
| 16409 | Malignant Neoplasms | EFNA3        | 0        | 2.90539  |  |
| 16410 | Malignant Neoplasms | HNRNPL       | 0        | 2.905758 |  |
| 16411 | Malignant Neoplasms | DYX1C1       | 0        | 2.918594 |  |
| 16412 | Malignant Neoplasms | TFEB         | 0.000114 | 2.925089 |  |
| 16413 | Malignant Neoplasms | NNMT         | 0.000273 | 2.93126  |  |
| 16414 | Malignant Neoplasms | C11orf45     | 0        | 2.931764 |  |
| 16415 | Malignant Neoplasms | CFI          | 0.000174 | 2.93439  |  |
| 16416 | Malignant Neoplasms | IFIT3        | 0.000647 | 2.948601 |  |
| 16417 | Malignant Neoplasms | MED25        | 0.000405 | 2.953415 |  |
| 16418 | Malignant Neoplasms | C4orf39      | 0        | 2.956402 |  |
| 16419 | Malignant Neoplasms | GPX1         | 0.000488 | 2.957755 |  |
| 16420 | Malignant Neoplasms | SLC16A5      | 0.000605 | 2.961518 |  |
| 16421 | Malignant Neoplasms | INHBE        | 0.000642 | 2.971835 |  |
| 16422 | Malignant Neoplasms | SLPI         | 0        | 2.971966 |  |
| 16423 | Malignant Neoplasms | CDCA7        | 0        | 2.977459 |  |
| 16424 | Malignant Neoplasms | C10orf10     | 0.000005 | 2.992878 |  |
| 16425 | Malignant Neoplasms | MAEL         | 0        | 2.996037 |  |
| 16426 | Malignant Neoplasms | ARHGAP23     | 0.000516 | 2.996162 |  |
| 16427 | Malignant Neoplasms | EME2         | 0.00077  | 2.998752 |  |
| 16428 | Malignant Neoplasms | PPP4R4       | 0        | 2.999379 |  |
| 16429 | Malignant Neoplasms | SUV420H1     | 0.000554 | 3.007917 |  |
| 16430 | Malignant Neoplasms | LOC100505522 | 0.000847 | 3.015464 |  |
| 16431 | Malignant Neoplasms | MACC1        | 0.003549 | 3.024789 |  |
| 16432 | Malignant Neoplasms | TNFRSF21     | 0.000066 | 3.029186 |  |
| 16433 | Malignant Neoplasms | KIF4A        | 0.000001 | 3.052197 |  |
| 16434 | Malignant Neoplasms | LPIN2        | 0.000686 | 3.067679 |  |
| 16435 | Malignant Neoplasms | PHLDA3       | 0.000037 | 3.070606 |  |
| 16436 | Malignant Neoplasms | GINS1        | 0        | 3.07162  |  |
| 16437 | Malignant Neoplasms | MTMR10       | 0.000202 | 3.076297 |  |
| 16438 | Malignant Neoplasms | F12          | 0        | 3.082553 |  |
| 16439 | Malignant Neoplasms | EDAR         | 0        | 3.098888 |  |
| 16440 | Malignant Neoplasms | TINAGL1      | 0.000151 | 3.103956 |  |
| 16441 | Malignant Neoplasms | STAT1        | 0        | 3.107809 |  |
| 16442 | Malignant Neoplasms | LCA5         | 0        | 3.115799 |  |
| 16443 | Malignant Neoplasms | TRIP13       | 0        | 3.129853 |  |
| 16444 | Malignant Neoplasms | RNF219       | 0.000471 | 3.147289 |  |
| 16445 | Malignant Neoplasms | STK31        | 0        | 3.147914 |  |
| 16446 | Malignant Neoplasms | ITGA3        | 0.000291 | 3.174543 |  |
| 16447 | Malignant Neoplasms | LOC650331    | 0        | 3.206762 |  |
| 16448 | Malignant Neoplasms | ASPH         | 0.000671 | 3.221404 |  |

|       |                     |           |          |          |  |
|-------|---------------------|-----------|----------|----------|--|
| 16449 | Malignant Neoplasms | UNC93B1   | 0.000002 | 3.228436 |  |
| 16450 | Malignant Neoplasms | F5        | 0.00014  | 3.231423 |  |
| 16451 | Malignant Neoplasms | KLHL35    | 0.000033 | 3.235531 |  |
| 16452 | Malignant Neoplasms | NUTF2     | 0        | 3.241433 |  |
| 16453 | Malignant Neoplasms | CEP55     | 0        | 3.248565 |  |
| 16454 | Malignant Neoplasms | MMP14     | 0        | 3.249611 |  |
| 16455 | Malignant Neoplasms | SOD2      | 0        | 3.254564 |  |
| 16456 | Malignant Neoplasms | FOXM1     | 0        | 3.25519  |  |
| 16457 | Malignant Neoplasms | LOC731404 | 0        | 3.266765 |  |
| 16458 | Malignant Neoplasms | BUB1      | 0.003759 | 3.279526 |  |
| 16459 | Malignant Neoplasms | SRCAP     | 0.000216 | 3.28083  |  |
| 16460 | Malignant Neoplasms | RXRA      | 0.000037 | 3.293291 |  |
| 16461 | Malignant Neoplasms | FANCI     | 0.0087   | 3.309157 |  |
| 16462 | Malignant Neoplasms | PRKD2     | 0.000124 | 3.334099 |  |
| 16463 | Malignant Neoplasms | TRIM56    | 0.000414 | 3.341161 |  |
| 16464 | Malignant Neoplasms | PIWIL1    | 0        | 3.34161  |  |
| 16465 | Malignant Neoplasms | CERKL     | 0        | 3.342308 |  |
| 16466 | Malignant Neoplasms | PPARA     | 0.000707 | 3.343854 |  |
| 16467 | Malignant Neoplasms | DPEP1     | 0.000827 | 3.34871  |  |
| 16468 | Malignant Neoplasms | CDH2      | 0        | 3.362404 |  |
| 16469 | Malignant Neoplasms | RAB3D     | 0.000388 | 3.404948 |  |
| 16470 | Malignant Neoplasms | MCM4      | 0        | 3.415645 |  |
| 16471 | Malignant Neoplasms | PLEKHA4   | 0.000011 | 3.432111 |  |
| 16472 | Malignant Neoplasms | C14orf115 | 0        | 3.437692 |  |
| 16473 | Malignant Neoplasms | IDUA      | 0.000729 | 3.446031 |  |
| 16474 | Malignant Neoplasms | TACSTD2   | 0        | 3.446898 |  |
| 16475 | Malignant Neoplasms | FZD5      | 0.000169 | 3.460795 |  |
| 16476 | Malignant Neoplasms | GFPT1     | 0.00021  | 3.46894  |  |
| 16477 | Malignant Neoplasms | PHLDA1    | 0        | 3.493862 |  |
| 16478 | Malignant Neoplasms | MIF       | 0.000001 | 3.504093 |  |
| 16479 | Malignant Neoplasms | TMEM106A  | 0.000004 | 3.534425 |  |
| 16480 | Malignant Neoplasms | TRPM4     | 0.000886 | 3.538012 |  |
| 16481 | Malignant Neoplasms | DOK4      | 0.00054  | 3.553059 |  |
| 16482 | Malignant Neoplasms | F11R      | 0.000851 | 3.555513 |  |
| 16483 | Malignant Neoplasms | GPSM2     | 0.000018 | 3.562648 |  |
| 16484 | Malignant Neoplasms | IFIT5     | 0.002833 | 3.586507 |  |
| 16485 | Malignant Neoplasms | DYRK2     | 0.000433 | 3.632288 |  |
| 16486 | Malignant Neoplasms | SSH3      | 0        | 3.644911 |  |
| 16487 | Malignant Neoplasms | BGN       | 0        | 3.64899  |  |
| 16488 | Malignant Neoplasms | PCSK6     | 0.000497 | 3.670522 |  |
| 16489 | Malignant Neoplasms | VNN1      | 0.000533 | 3.670827 |  |
| 16490 | Malignant Neoplasms | NEBL      | 0        | 3.699267 |  |
| 16491 | Malignant Neoplasms | WDSOF1    | 0.001352 | 3.709982 |  |
| 16492 | Malignant Neoplasms | PBK       | 0.000001 | 3.714962 |  |
| 16493 | Malignant Neoplasms | COL4A1    | 0        | 3.732771 |  |
| 16494 | Malignant Neoplasms | KLK6      | 0        | 3.733988 |  |
| 16495 | Malignant Neoplasms | RNASET2   | 0.000257 | 3.741787 |  |
| 16496 | Malignant Neoplasms | HIG2      | 0        | 3.74435  |  |
| 16497 | Malignant Neoplasms | ANLN      | 0        | 3.792495 |  |
| 16498 | Malignant Neoplasms | APOE      | 0        | 3.797515 |  |

|       |                     |          |          |          |  |
|-------|---------------------|----------|----------|----------|--|
| 16499 | Malignant Neoplasms | TMPRSS3  | 0        | 3.798986 |  |
| 16500 | Malignant Neoplasms | TMEM97   | 0        | 3.826889 |  |
| 16501 | Malignant Neoplasms | KCNJ15   | 0        | 3.837106 |  |
| 16502 | Malignant Neoplasms | B3GALTL  | 0.049356 | 3.840546 |  |
| 16503 | Malignant Neoplasms | ALDH3A1  | 0.000597 | 3.841355 |  |
| 16504 | Malignant Neoplasms | AQP9     | 0.000053 | 3.849158 |  |
| 16505 | Malignant Neoplasms | RELL2    | 0.003759 | 3.855649 |  |
| 16506 | Malignant Neoplasms | CCDC86   | 0.002201 | 3.867938 |  |
| 16507 | Malignant Neoplasms | E2F5     | 0.005272 | 3.890783 |  |
| 16508 | Malignant Neoplasms | HSD11B1  | 0.000121 | 3.932743 |  |
| 16509 | Malignant Neoplasms | TNNI2    | 0.000011 | 3.944015 |  |
| 16510 | Malignant Neoplasms | PUS7     | 0        | 3.945489 |  |
| 16511 | Malignant Neoplasms | PVRL2    | 0.000263 | 3.967878 |  |
| 16512 | Malignant Neoplasms | CCRL2    | 0.000466 | 3.970309 |  |
| 16513 | Malignant Neoplasms | XPOT     | 0.014459 | 3.992622 |  |
| 16514 | Malignant Neoplasms | PWWP2B   | 0.000355 | 4.024844 |  |
| 16515 | Malignant Neoplasms | NLRC5    | 0.000204 | 4.032659 |  |
| 16516 | Malignant Neoplasms | PMAIP1   | 0        | 4.0525   |  |
| 16517 | Malignant Neoplasms | CDC2     | 0        | 4.067238 |  |
| 16518 | Malignant Neoplasms | CLDN2    | 0        | 4.07628  |  |
| 16519 | Malignant Neoplasms | SLC45A4  | 0.000471 | 4.093217 |  |
| 16520 | Malignant Neoplasms | ADAP1    | 0.000647 | 4.096481 |  |
| 16521 | Malignant Neoplasms | SERPINE1 | 0.000061 | 4.1164   |  |
| 16522 | Malignant Neoplasms | CXCL9    | 0        | 4.116745 |  |
| 16523 | Malignant Neoplasms | FTL      | 0.003014 | 4.124829 |  |
| 16524 | Malignant Neoplasms | DMBX1    | 0.000226 | 4.161581 |  |
| 16525 | Malignant Neoplasms | CKB      | 0.000302 | 4.191771 |  |
| 16526 | Malignant Neoplasms | IFITM1   | 0        | 4.28338  |  |
| 16527 | Malignant Neoplasms | KLF5     | 0.00032  | 4.284359 |  |
| 16528 | Malignant Neoplasms | ASGR2    | 0.000553 | 4.302714 |  |
| 16529 | Malignant Neoplasms | DNM1     | 0.000359 | 4.312468 |  |
| 16530 | Malignant Neoplasms | SLCO4A1  | 0        | 4.326759 |  |
| 16531 | Malignant Neoplasms | SERPINA5 | 0.000352 | 4.345646 |  |
| 16532 | Malignant Neoplasms | PVRL1    | 0.000522 | 4.458198 |  |
| 16533 | Malignant Neoplasms | SRPX2    | 0        | 4.507537 |  |
| 16534 | Malignant Neoplasms | NOXO1    | 0.000183 | 4.549523 |  |
| 16535 | Malignant Neoplasms | ATP6V1B1 | 0.000074 | 4.572513 |  |
| 16536 | Malignant Neoplasms | SLC6A6   | 0        | 4.621348 |  |
| 16537 | Malignant Neoplasms | PTGS2    | 0.000139 | 4.634416 |  |
| 16538 | Malignant Neoplasms | IRF9     | 0.000104 | 4.634974 |  |
| 16539 | Malignant Neoplasms | SERPINA1 | 0.000392 | 4.686709 |  |
| 16540 | Malignant Neoplasms | SULT2A1  | 0.000605 | 4.720173 |  |
| 16541 | Malignant Neoplasms | FMO3     | 0.000071 | 4.720673 |  |
| 16542 | Malignant Neoplasms | CYTH2    | 0.000085 | 4.752988 |  |
| 16543 | Malignant Neoplasms | CLCC1    | 0.000647 | 4.781185 |  |
| 16544 | Malignant Neoplasms | IL15     | 0.000239 | 4.831838 |  |
| 16545 | Malignant Neoplasms | SERPINF2 | 0.00067  | 4.841546 |  |
| 16546 | Malignant Neoplasms | CXCL10   | 0        | 4.8737   |  |
| 16547 | Malignant Neoplasms | MBP      | 0.000647 | 4.960741 |  |
| 16548 | Malignant Neoplasms | RICTOR   | 0.000704 | 4.981218 |  |

|       |                     |           |          |          |  |
|-------|---------------------|-----------|----------|----------|--|
| 16549 | Malignant Neoplasms | TYMP      | 0.000003 | 4.981838 |  |
| 16550 | Malignant Neoplasms | AHR       | 0.000426 | 5.006937 |  |
| 16551 | Malignant Neoplasms | SLCO1B3   | 0        | 5.007902 |  |
| 16552 | Malignant Neoplasms | DACH1     | 0.001964 | 5.017765 |  |
| 16553 | Malignant Neoplasms | ATP10B    | 0.000833 | 5.058226 |  |
| 16554 | Malignant Neoplasms | HKDC1     | 0        | 5.076388 |  |
| 16555 | Malignant Neoplasms | ABLIM3    | 0.000198 | 5.087636 |  |
| 16556 | Malignant Neoplasms | IL22RA1   | 0.000603 | 5.144601 |  |
| 16557 | Malignant Neoplasms | CXCL1     | 0        | 5.226033 |  |
| 16558 | Malignant Neoplasms | FAM113B   | 0.000471 | 5.288628 |  |
| 16559 | Malignant Neoplasms | COL1A2    | 0        | 5.292898 |  |
| 16560 | Malignant Neoplasms | CP        | 0.00038  | 5.509002 |  |
| 16561 | Malignant Neoplasms | CPB2      | 0.000432 | 5.613978 |  |
| 16562 | Malignant Neoplasms | C3        | 0.000006 | 5.668511 |  |
| 16563 | Malignant Neoplasms | PTK2      | 0.000112 | 5.687439 |  |
| 16564 | Malignant Neoplasms | HMMR      | 0.000025 | 5.804377 |  |
| 16565 | Malignant Neoplasms | GATA2     | 0.000049 | 5.893886 |  |
| 16566 | Malignant Neoplasms | CTSE      | 0.000727 | 5.963868 |  |
| 16567 | Malignant Neoplasms | MUPCDH    | 0.000494 | 5.977978 |  |
| 16568 | Malignant Neoplasms | ZNF702P   | 0.000417 | 6.02341  |  |
| 16569 | Malignant Neoplasms | TINAG     | 0.000471 | 6.02389  |  |
| 16570 | Malignant Neoplasms | WNT10A    | 0.000038 | 6.06077  |  |
| 16571 | Malignant Neoplasms | SLC13A5   | 0.000331 | 6.076943 |  |
| 16572 | Malignant Neoplasms | C8A       | 0.000531 | 6.120991 |  |
| 16573 | Malignant Neoplasms | PLEKHG1   | 0.00029  | 6.186895 |  |
| 16574 | Malignant Neoplasms | PAK1      | 0.000697 | 6.20532  |  |
| 16575 | Malignant Neoplasms | ELL3      | 0.000471 | 6.218115 |  |
| 16576 | Malignant Neoplasms | LRG1      | 0.000309 | 6.245968 |  |
| 16577 | Malignant Neoplasms | PLK2      | 0.000051 | 6.303497 |  |
| 16578 | Malignant Neoplasms | BTG1      | 0.000133 | 6.312695 |  |
| 16579 | Malignant Neoplasms | MMP10     | 0        | 6.397166 |  |
| 16580 | Malignant Neoplasms | DSC3      | 0        | 6.40146  |  |
| 16581 | Malignant Neoplasms | ZHX1      | 0.000538 | 6.473214 |  |
| 16582 | Malignant Neoplasms | PIK3R5    | 0        | 6.528764 |  |
| 16583 | Malignant Neoplasms | RBP4      | 0.000557 | 6.658636 |  |
| 16584 | Malignant Neoplasms | PYGB      | 0.000168 | 6.672657 |  |
| 16585 | Malignant Neoplasms | ASGR1     | 0.000048 | 6.679332 |  |
| 16586 | Malignant Neoplasms | SLC28A3   | 0.000255 | 6.682218 |  |
| 16587 | Malignant Neoplasms | RHBDL2    | 0.000597 | 6.686852 |  |
| 16588 | Malignant Neoplasms | C5        | 0.00011  | 6.687382 |  |
| 16589 | Malignant Neoplasms | AGRN      | 0.000001 | 6.749664 |  |
| 16590 | Malignant Neoplasms | PLEKHA7   | 0.000244 | 6.787971 |  |
| 16591 | Malignant Neoplasms | FCN3      | 0.000009 | 6.844049 |  |
| 16592 | Malignant Neoplasms | APOC2     | 0.000051 | 6.904064 |  |
| 16593 | Malignant Neoplasms | LOC651255 | 0        | 6.905853 |  |
| 16594 | Malignant Neoplasms | AGXT      | 0.000773 | 6.935567 |  |
| 16595 | Malignant Neoplasms | HPD       | 0.000531 | 7.014538 |  |
| 16596 | Malignant Neoplasms | SEMA4B    | 0.000534 | 7.032327 |  |
| 16597 | Malignant Neoplasms | C6        | 0.00046  | 7.054535 |  |
| 16598 | Malignant Neoplasms | SAA4      | 0.000529 | 7.065    |  |

|       |                     |          |          |           |  |
|-------|---------------------|----------|----------|-----------|--|
| 16599 | Malignant Neoplasms | LRRC31   | 0.00014  | 7.071815  |  |
| 16600 | Malignant Neoplasms | ETV7     | 0.000059 | 7.214569  |  |
| 16601 | Malignant Neoplasms | CXCL3    | 0        | 7.233392  |  |
| 16602 | Malignant Neoplasms | LGALS9   | 0.000378 | 7.278245  |  |
| 16603 | Malignant Neoplasms | C6orf145 | 0.000087 | 7.289675  |  |
| 16604 | Malignant Neoplasms | PLG      | 0.000498 | 7.361402  |  |
| 16605 | Malignant Neoplasms | PON3     | 0.000647 | 7.506333  |  |
| 16606 | Malignant Neoplasms | MMRN2    | 0.000099 | 7.512883  |  |
| 16607 | Malignant Neoplasms | ITIH1    | 0.000337 | 7.554118  |  |
| 16608 | Malignant Neoplasms | DDC      | 0.000448 | 7.746083  |  |
| 16609 | Malignant Neoplasms | ZAK      | 0.000658 | 7.747274  |  |
| 16610 | Malignant Neoplasms | GAB1     | 0.000275 | 7.851537  |  |
| 16611 | Malignant Neoplasms | PLXNA2   | 0.000462 | 7.884722  |  |
| 16612 | Malignant Neoplasms | C4BPA    | 0.000535 | 7.948833  |  |
| 16613 | Malignant Neoplasms | APOC1    | 0.000001 | 8.000367  |  |
| 16614 | Malignant Neoplasms | LGALS9C  | 0.000155 | 8.105818  |  |
| 16615 | Malignant Neoplasms | TTR      | 0.000676 | 8.109081  |  |
| 16616 | Malignant Neoplasms | DHRS9    | 0.000282 | 8.203724  |  |
| 16617 | Malignant Neoplasms | CYP2C8   | 0.000673 | 8.207707  |  |
| 16618 | Malignant Neoplasms | TESC     | 0        | 8.282366  |  |
| 16619 | Malignant Neoplasms | UPK3A    | 0.000419 | 8.411729  |  |
| 16620 | Malignant Neoplasms | DTX4     | 0.000202 | 8.54253   |  |
| 16621 | Malignant Neoplasms | SLC16A4  | 0.000293 | 8.722472  |  |
| 16622 | Malignant Neoplasms | CLDN1    | 0        | 8.769876  |  |
| 16623 | Malignant Neoplasms | VEGFA    | 0.00073  | 8.807001  |  |
| 16624 | Malignant Neoplasms | DSG3     | 0        | 8.93798   |  |
| 16625 | Malignant Neoplasms | CXCL2    | 0        | 8.951083  |  |
| 16626 | Malignant Neoplasms | LBP      | 0.000127 | 8.984359  |  |
| 16627 | Malignant Neoplasms | HAMP     | 0.000059 | 9.033264  |  |
| 16628 | Malignant Neoplasms | IL1A     | 0        | 9.050041  |  |
| 16629 | Malignant Neoplasms | TRIM29   | 0        | 9.058532  |  |
| 16630 | Malignant Neoplasms | TCN1     | 0        | 9.094781  |  |
| 16631 | Malignant Neoplasms | KRT23    | 0        | 9.22809   |  |
| 16632 | Malignant Neoplasms | KRTCAP3  | 0.000382 | 9.275024  |  |
| 16633 | Malignant Neoplasms | RAB7B    | 0.000304 | 9.350441  |  |
| 16634 | Malignant Neoplasms | KIAA0182 | 0.000139 | 9.586452  |  |
| 16635 | Malignant Neoplasms | APCS     | 0.000082 | 9.596353  |  |
| 16636 | Malignant Neoplasms | ETV4     | 0        | 9.616632  |  |
| 16637 | Malignant Neoplasms | DDX60    | 0.00012  | 9.946946  |  |
| 16638 | Malignant Neoplasms | TMPRSS4  | 0.000313 | 10.114752 |  |
| 16639 | Malignant Neoplasms | FAM3D    | 0.00003  | 10.343878 |  |
| 16640 | Malignant Neoplasms | KNG1     | 0.000331 | 10.388199 |  |
| 16641 | Malignant Neoplasms | GJB6     | 0.000095 | 10.461198 |  |
| 16642 | Malignant Neoplasms | ARSJ     | 0.000233 | 10.87893  |  |
| 16643 | Malignant Neoplasms | HRG      | 0.000312 | 11.044669 |  |
| 16644 | Malignant Neoplasms | SGK1     | 0.000413 | 11.064812 |  |
| 16645 | Malignant Neoplasms | TMC4     | 0.000486 | 11.248471 |  |
| 16646 | Malignant Neoplasms | IFI27    | 0.000005 | 11.248729 |  |
| 16647 | Malignant Neoplasms | CEACAM1  | 0.000605 | 11.382833 |  |
| 16648 | Malignant Neoplasms | SERPINC1 | 0.000285 | 11.791284 |  |



|       |                     |              |          |           |  |
|-------|---------------------|--------------|----------|-----------|--|
| 16649 | Malignant Neoplasms | SERPINA3     | 0.000001 | 11.942192 |  |
| 16650 | Malignant Neoplasms | CMBL         | 0.000647 | 11.99801  |  |
| 16651 | Malignant Neoplasms | FAM13A       | 0.000647 | 12.331898 |  |
| 16652 | Malignant Neoplasms | APOB         | 0.000088 | 13.0809   |  |
| 16653 | Malignant Neoplasms | AHSG         | 0.000112 | 13.371622 |  |
| 16654 | Malignant Neoplasms | TUSC1        | 0.000186 | 13.373626 |  |
| 16655 | Malignant Neoplasms | APOC3        | 0.000181 | 13.701454 |  |
| 16656 | Malignant Neoplasms | ZNF264       | 0.000244 | 13.760516 |  |
| 16657 | Malignant Neoplasms | MMP1         | 0        | 13.93607  |  |
| 16658 | Malignant Neoplasms | LGR4         | 0.000266 | 13.954556 |  |
| 16659 | Malignant Neoplasms | CRIP2        | 0.000514 | 14.058359 |  |
| 16660 | Malignant Neoplasms | HPX          | 0.000192 | 14.287143 |  |
| 16661 | Malignant Neoplasms | MVP          | 0.000139 | 14.559649 |  |
| 16662 | Malignant Neoplasms | FGG          | 0.000014 | 14.651355 |  |
| 16663 | Malignant Neoplasms | FGFR3        | 0.000591 | 14.82059  |  |
| 16664 | Malignant Neoplasms | PROS1        | 0.000392 | 15.1562   |  |
| 16665 | Malignant Neoplasms | F2           | 0.000047 | 15.443368 |  |
| 16666 | Malignant Neoplasms | VTN          | 0.000044 | 15.844447 |  |
| 16667 | Malignant Neoplasms | LOC100506781 | 0.000686 | 15.886755 |  |
| 16668 | Malignant Neoplasms | HNMT         | 0.000462 | 15.912229 |  |
| 16669 | Malignant Neoplasms | ORM2         | 0.00009  | 16.094898 |  |
| 16670 | Malignant Neoplasms | CYP2E1       | 0.000072 | 16.227626 |  |
| 16671 | Malignant Neoplasms | CYP3A5       | 0.000647 | 16.404272 |  |
| 16672 | Malignant Neoplasms | SAMD9        | 0.000225 | 17.780734 |  |
| 16673 | Malignant Neoplasms | FGL1         | 0.000039 | 18.32827  |  |
| 16674 | Malignant Neoplasms | TF           | 0.000068 | 18.608249 |  |
| 16675 | Malignant Neoplasms | PLEKHA6      | 0.000104 | 18.991039 |  |
| 16676 | Malignant Neoplasms | CTSH         | 0.00045  | 19.875231 |  |
| 16677 | Malignant Neoplasms | ZNF655       | 0.000239 | 20.238714 |  |
| 16678 | Malignant Neoplasms | IFI6         | 0        | 20.704685 |  |
| 16679 | Malignant Neoplasms | GC           | 0.000013 | 20.947027 |  |
| 16680 | Malignant Neoplasms | AMBP         | 0.000021 | 21.099729 |  |
| 16681 | Malignant Neoplasms | APOA2        | 0.000023 | 21.365529 |  |
| 16682 | Malignant Neoplasms | HP           | 0.000009 | 21.852969 |  |
| 16683 | Malignant Neoplasms | RASSF6       | 0.000063 | 22.251862 |  |
| 16684 | Malignant Neoplasms | NUDC         | 0        | 22.897111 |  |
| 16685 | Malignant Neoplasms | ALB          | 0.000007 | 23.019959 |  |
| 16686 | Malignant Neoplasms | APOA1        | 0.000018 | 23.169381 |  |
| 16687 | Malignant Neoplasms | ANXA13       | 0.000244 | 23.216715 |  |
| 16688 | Malignant Neoplasms | FGB          | 0.000008 | 23.984148 |  |
| 16689 | Malignant Neoplasms | FGA          | 0.000008 | 25.158992 |  |
| 16690 | Malignant Neoplasms | AIM1         | 0.000428 | 25.235589 |  |
| 16691 | Malignant Neoplasms | CRP          | 0.000002 | 25.311911 |  |
| 16692 | Malignant Neoplasms | ORM1         | 0.000008 | 25.514711 |  |
| 16693 | Malignant Neoplasms | POF1B        | 0.000531 | 25.953685 |  |
| 16694 | Malignant Neoplasms | GPR37        | 0.000647 | 26.551556 |  |
| 16695 | Malignant Neoplasms | RNF135       | 0.000244 | 26.826077 |  |
| 16696 | Malignant Neoplasms | SLC44A4      | 0.000317 | 32.806091 |  |
| 16697 | Malignant Neoplasms | DPP4         | 0.000085 | 35.946916 |  |
| 16698 | Malignant Neoplasms | AZGP1        | 0.000547 | 37.046467 |  |

|       |                          |              |          |            |  |
|-------|--------------------------|--------------|----------|------------|--|
| 16699 | Malignant Neoplasms      | LOC100128511 | 0        | 37.054894  |  |
| 16700 | Malignant Neoplasms      | XIST         | 0.000382 | 42.125514  |  |
| 16701 | Malignant Neoplasms      | DAPK1        | 0.000189 | 47.300908  |  |
| 16702 | Malignant Neoplasms      | TMED3        | 0.000647 | 48.224737  |  |
| 16703 | Malignant Neoplasms      | AQP3         | 0.00055  | 49.138813  |  |
| 16704 | Malignant Neoplasms      | RASEF        | 0.000163 | 49.84891   |  |
| 16705 | Malignant Neoplasms      | C2orf55      | 0        | 54.032204  |  |
| 16706 | Malignant Neoplasms      | MUC20        | 0.000067 | 55.376958  |  |
| 16707 | Malignant Neoplasms      | CLRN3        | 0.00058  | 58.316622  |  |
| 16708 | Malignant Neoplasms      | SEMA3C       | 0.000382 | 70.986243  |  |
| 16709 | Malignant Neoplasms      | GPX2         | 0.000104 | 81.770143  |  |
| 16710 | Malignant Neoplasms      | CCL14-CCL15  | 0.000879 | 87.224563  |  |
| 16711 | Malignant Neoplasms      | RAB25        | 0.000102 | 101.425117 |  |
| 16712 | Malignant Neoplasms      | TSPAN8       | 0.000392 | 151.056058 |  |
| 16713 | Malignant Neoplasms      | AKR1C3       | 0.000095 | 258.985756 |  |
| 16714 | Malignant Neoplasms      | LYZ          | 0.000067 | 378.645226 |  |
| 16715 | Malignant tumor of colon | MAPK10       | 0.010117 | -4.758095  |  |
| 16716 | Malignant tumor of colon | DLGAP4       | 0.009754 | -2.082438  |  |
| 16717 | Malignant tumor of colon | NOC2L        | 0.026594 | 2.104099   |  |
| 16718 | Malignant tumor of colon | MORC4        | 0.004279 | 2.112565   |  |
| 16719 | Malignant tumor of colon | LOC90835     | 0.001125 | 2.166442   |  |
| 16720 | Malignant tumor of colon | SFRS3        | 0.023214 | 2.178891   |  |
| 16721 | Malignant tumor of colon | EXOSC8       | 0.023557 | 2.246594   |  |
| 16722 | Malignant tumor of colon | COMT         | 0.0087   | 2.27312    |  |
| 16723 | Malignant tumor of colon | DARS2        | 0.003721 | 2.328628   |  |
| 16724 | Malignant tumor of colon | ENC1         | 0.005205 | 2.353768   |  |
| 16725 | Malignant tumor of colon | CSPP1        | 0.004279 | 2.417897   |  |
| 16726 | Malignant tumor of colon | RPL35A       | 0.023557 | 2.488761   |  |
| 16727 | Malignant tumor of colon | SLC7A6       | 0.005899 | 2.538138   |  |
| 16728 | Malignant tumor of colon | UBE2V1       | 0.004279 | 2.625998   |  |
| 16729 | Malignant tumor of colon | MCM8         | 0.004563 | 2.888232   |  |
| 16730 | Malignant tumor of colon | C13orf3      | 0.010117 | 3.221261   |  |
| 16731 | Malignant tumor of colon | BUB1         | 0.003759 | 3.279526   |  |
| 16732 | Malignant tumor of colon | FANCI        | 0.0087   | 3.309157   |  |
| 16733 | Malignant tumor of colon | CDC6         | 0.011855 | 3.551337   |  |
| 16734 | Malignant tumor of colon | WDSOF1       | 0.001352 | 3.709982   |  |
| 16735 | Malignant tumor of colon | RELL2        | 0.003759 | 3.855649   |  |
| 16736 | Malignant tumor of colon | CCDC86       | 0.002201 | 3.867938   |  |
| 16737 | Malignant tumor of colon | E2F5         | 0.005272 | 3.890783   |  |
| 16738 | Malignant tumor of colon | XPOT         | 0.014459 | 3.992622   |  |
| 16739 | Malignant tumor of colon | KIF20A       | 0.000391 | 5.468525   |  |
| 16740 | Malignant tumor of colon | HMMR         | 0.000025 | 5.804377   |  |
| 16741 | Maximum                  | PTPRR        | 0        | -6.324252  |  |
| 16742 | Maximum                  | LGR5         | 0        | -5.820083  |  |
| 16743 | Maximum                  | MEF2C        | 0        | -3.441646  |  |
| 16744 | Maximum                  | LOC100507039 | 0        | -3.435516  |  |
| 16745 | Maximum                  | SAMD5        | 0        | -3.412468  |  |
| 16746 | Maximum                  | PDE4D        | 0        | -3.398408  |  |
| 16747 | Maximum                  | FAM198B      | 0        | -3.312024  |  |
| 16748 | Maximum                  | OAS1         | 0        | -3.107858  |  |

|       |         |              |   |           |  |
|-------|---------|--------------|---|-----------|--|
| 16749 | Maximum | GPR125       | 0 | -2.995118 |  |
| 16750 | Maximum | NAV3         | 0 | -2.93174  |  |
| 16751 | Maximum | ANKRD29      | 0 | -2.772202 |  |
| 16752 | Maximum | PLK2         | 0 | -2.70096  |  |
| 16753 | Maximum | RORA         | 0 | -2.564867 |  |
| 16754 | Maximum | SLC35D1      | 0 | -2.486279 |  |
| 16755 | Maximum | MTHFD1L      | 0 | -2.387688 |  |
| 16756 | Maximum | PDCD2        | 0 | -2.293398 |  |
| 16757 | Maximum | ABHD6        | 0 | -2.268189 |  |
| 16758 | Maximum | LOC100288413 | 0 | -2.219809 |  |
| 16759 | Maximum | BMPR1B       | 0 | -2.203381 |  |
| 16760 | Maximum | REPS1        | 0 | -2.177362 |  |
| 16761 | Maximum | SATB2        | 0 | -2.166841 |  |
| 16762 | Maximum | PTGR1        | 0 | -2.15227  |  |
| 16763 | Maximum | PDK1         | 0 | -2.121029 |  |
| 16764 | Maximum | KITLG        | 0 | -2.115484 |  |
| 16765 | Maximum | PHLDA1       | 0 | -2.110744 |  |
| 16766 | Maximum | LIMS1        | 0 | -2.08165  |  |
| 16767 | Maximum | ELF1         | 0 | -2.072611 |  |
| 16768 | Maximum | SPATA5       | 0 | -2.069731 |  |
| 16769 | Maximum | LOC653602    | 0 | -2.020459 |  |
| 16770 | Maximum | COMMD3       | 0 | -2.020129 |  |
| 16771 | Maximum | E2F5         | 0 | -2.002048 |  |
| 16772 | Maximum | STX7         | 0 | 2.022025  |  |
| 16773 | Maximum | MTMR11       | 0 | 2.039651  |  |
| 16774 | Maximum | EPHB3        | 0 | 2.044202  |  |
| 16775 | Maximum | TNS1         | 0 | 2.124447  |  |
| 16776 | Maximum | MUC20        | 0 | 2.146854  |  |
| 16777 | Maximum | MUC5AC       | 0 | 2.187337  |  |
| 16778 | Maximum | TMEM61       | 0 | 2.206764  |  |
| 16779 | Maximum | ENPP5        | 0 | 2.207396  |  |
| 16780 | Maximum | TPPP         | 0 | 2.273993  |  |
| 16781 | Maximum | FBXO8        | 0 | 2.462356  |  |
| 16782 | Maximum | ZMIZ1        | 0 | 2.502177  |  |
| 16783 | Maximum | TRPC1        | 0 | 2.522467  |  |
| 16784 | Maximum | FAM43A       | 0 | 2.526297  |  |
| 16785 | Maximum | ELF3         | 0 | 2.596663  |  |
| 16786 | Maximum | KLK10        | 0 | 2.882344  |  |
| 16787 | Maximum | KRT80        | 0 | 3.053349  |  |
| 16788 | Maximum | TM4SF1       | 0 | 3.334602  |  |
| 16789 | Maximum | MYLK         | 0 | 3.437058  |  |
| 16790 | Maximum | LOC146336    | 0 | 3.445174  |  |
| 16791 | Maximum | SERPINA1     | 0 | 3.687605  |  |
| 16792 | Maximum | MAP2K5       | 0 | 3.983236  |  |
| 16793 | Maximum | CYBRD1       | 0 | 4.140123  |  |
| 16794 | Maximum | CRYAB        | 0 | 5.835111  |  |
| 16795 | Maximum | AHNAK2       | 0 | 6.115869  |  |
| 16796 | Maximum | AQP3         | 0 | 13.694997 |  |
| 16797 | Maximum | HSPA1A       | 0 | 13.695802 |  |
| 16798 | Maximum | TCF7         | 0 | 14.43689  |  |

|       |        |              |          |           |  |
|-------|--------|--------------|----------|-----------|--|
| 16799 | Melena | TM4SF4       | 0.009552 | -5.804545 |  |
| 16800 | Melena | LCN15        | 0.001238 | -5.790822 |  |
| 16801 | Melena | MTTP         | 0.002466 | -4.174457 |  |
| 16802 | Melena | NOS1         | 0        | -3.789628 |  |
| 16803 | Melena | SOX1         | 0        | -3.509699 |  |
| 16804 | Melena | KHDC1L       | 0.001333 | -3.422489 |  |
| 16805 | Melena | HGFAC        | 0.016996 | -3.333027 |  |
| 16806 | Melena | WT1          | 0.000193 | -3.279199 |  |
| 16807 | Melena | SLC34A2      | 0.01743  | -3.262472 |  |
| 16808 | Melena | PROC         | 0.009352 | -3.257868 |  |
| 16809 | Melena | APOC1        | 0.005004 | -3.114316 |  |
| 16810 | Melena | C4orf49      | 0.000868 | -3.090347 |  |
| 16811 | Melena | FLJ36840     | 0        | -3.056013 |  |
| 16812 | Melena | KCNK15       | 0.000002 | -3.050944 |  |
| 16813 | Melena | LONRF2       | 0.003702 | -2.916848 |  |
| 16814 | Melena | PKLR         | 0.001163 | -2.906511 |  |
| 16815 | Melena | CLU          | 0.002405 | -2.894311 |  |
| 16816 | Melena | TKTL1        | 0.010266 | -2.872553 |  |
| 16817 | Melena | MMP23A       | 0        | -2.85111  |  |
| 16818 | Melena | ALDH3B2      | 0.000011 | -2.817105 |  |
| 16819 | Melena | LOC100507193 | 0.000348 | -2.800697 |  |
| 16820 | Melena | GALNT14      | 0.004525 | -2.792721 |  |
| 16821 | Melena | BCHE         | 0.010633 | -2.792177 |  |
| 16822 | Melena | CDH2         | 0.000405 | -2.786761 |  |
| 16823 | Melena | RNF144B      | 0        | -2.776336 |  |
| 16824 | Melena | CELF4        | 0.000615 | -2.759974 |  |
| 16825 | Melena | FCGR2A       | 0.000005 | -2.743996 |  |
| 16826 | Melena | HEATR7B1     | 0.00359  | -2.732051 |  |
| 16827 | Melena | TMOD1        | 0.002559 | -2.693288 |  |
| 16828 | Melena | SPP1         | 0.000482 | -2.677758 |  |
| 16829 | Melena | CRABP2       | 0.006914 | -2.675786 |  |
| 16830 | Melena | PLG          | 0.016473 | -2.674303 |  |
| 16831 | Melena | HYDIN        | 0.000023 | -2.655811 |  |
| 16832 | Melena | CDH4         | 0.003702 | -2.643302 |  |
| 16833 | Melena | NBLA00301    | 0.002423 | -2.619192 |  |
| 16834 | Melena | LOC100287547 | 0.015261 | -2.616197 |  |
| 16835 | Melena | C3orf16      | 0.000447 | -2.610502 |  |
| 16836 | Melena | HCG4         | 0.000047 | -2.54578  |  |
| 16837 | Melena | TRIM55       | 0.000115 | -2.537364 |  |
| 16838 | Melena | KCNN3        | 0.004525 | -2.524265 |  |
| 16839 | Melena | L1CAM        | 0.000243 | -2.519861 |  |
| 16840 | Melena | KCNC3        | 0        | -2.491593 |  |
| 16841 | Melena | GH1          | 0.000039 | -2.487859 |  |
| 16842 | Melena | DCDC2        | 0.001535 | -2.487473 |  |
| 16843 | Melena | RUNX2        | 0.008775 | -2.468869 |  |
| 16844 | Melena | MYOZ2        | 0.000967 | -2.464938 |  |
| 16845 | Melena | FAM20A       | 0.012432 | -2.448715 |  |
| 16846 | Melena | KCNMB1       | 0.000348 | -2.447436 |  |
| 16847 | Melena | GBA          | 0.000027 | -2.446266 |  |
| 16848 | Melena | C1orf61      | 0.000008 | -2.41909  |  |

|       |        |              |          |           |  |
|-------|--------|--------------|----------|-----------|--|
| 16849 | Melena | AGXT2        | 0.008935 | -2.414805 |  |
| 16850 | Melena | ABCB4        | 0.001755 | -2.399986 |  |
| 16851 | Melena | CYP2B7P1     | 0.00796  | -2.390564 |  |
| 16852 | Melena | RPS6KA6      | 0.008891 | -2.389067 |  |
| 16853 | Melena | CCND3        | 0.000069 | -2.387478 |  |
| 16854 | Melena | SLC1A3       | 0.001982 | -2.387428 |  |
| 16855 | Melena | C13orf30     | 0.003286 | -2.384857 |  |
| 16856 | Melena | CXorf18      | 0.000084 | -2.383912 |  |
| 16857 | Melena | C8orf46      | 0.013239 | -2.379698 |  |
| 16858 | Melena | LOC338667    | 0.000001 | -2.378794 |  |
| 16859 | Melena | SLC14A1      | 0.011801 | -2.377959 |  |
| 16860 | Melena | PFKFB1       | 0.014286 | -2.371519 |  |
| 16861 | Melena | MAF          | 0.010084 | -2.369808 |  |
| 16862 | Melena | LOC100507531 | 0.002457 | -2.367032 |  |
| 16863 | Melena | EMID2        | 0.000001 | -2.36071  |  |
| 16864 | Melena | CLIP3        | 0.000808 | -2.358243 |  |
| 16865 | Melena | PIK3R4       | 0.010003 | -2.356814 |  |
| 16866 | Melena | TCEAL2       | 0.00014  | -2.351044 |  |
| 16867 | Melena | FGF20        | 0.003286 | -2.342792 |  |
| 16868 | Melena | CILP         | 0.011459 | -2.341901 |  |
| 16869 | Melena | PDGFRL       | 0.007956 | -2.337221 |  |
| 16870 | Melena | PIPOX        | 0.004068 | -2.333892 |  |
| 16871 | Melena | LOC100510224 | 0.000045 | -2.333025 |  |
| 16872 | Melena | CCDC8        | 0.000734 | -2.329442 |  |
| 16873 | Melena | HABP2        | 0.013195 | -2.326162 |  |
| 16874 | Melena | MAGEA12      | 0.011803 | -2.325203 |  |
| 16875 | Melena | RIMS1        | 0.000929 | -2.319664 |  |
| 16876 | Melena | IQCA1        | 0.0003   | -2.308267 |  |
| 16877 | Melena | CCDC74B      | 0.000021 | -2.300878 |  |
| 16878 | Melena | SIPA1L3      | 0.001219 | -2.294633 |  |
| 16879 | Melena | DNAI2        | 0.000734 | -2.293562 |  |
| 16880 | Melena | COL2A1       | 0.008515 | -2.287112 |  |
| 16881 | Melena | VGLL1        | 0.004404 | -2.283688 |  |
| 16882 | Melena | SLC22A2      | 0.000157 | -2.278474 |  |
| 16883 | Melena | KAL1         | 0.000902 | -2.260635 |  |
| 16884 | Melena | WDR86        | 0.013364 | -2.260613 |  |
| 16885 | Melena | PQLC3        | 0.000243 | -2.259458 |  |
| 16886 | Melena | RBP4         | 0.010449 | -2.257376 |  |
| 16887 | Melena | PRSS54       | 0.000348 | -2.249045 |  |
| 16888 | Melena | NCRNA00161   | 0.00372  | -2.246095 |  |
| 16889 | Melena | BRSK2        | 0.000005 | -2.245425 |  |
| 16890 | Melena | DPEP2        | 0.010022 | -2.237906 |  |
| 16891 | Melena | ANO4         | 0.001501 | -2.234775 |  |
| 16892 | Melena | C10orf112    | 0.002405 | -2.230455 |  |
| 16893 | Melena | RIMS2        | 0.01025  | -2.230412 |  |
| 16894 | Melena | TMEM132B     | 0.009214 | -2.211613 |  |
| 16895 | Melena | FBXO17       | 0.000413 | -2.201327 |  |
| 16896 | Melena | C3           | 0.003013 | -2.200054 |  |
| 16897 | Melena | KCNE1        | 0.009581 | -2.197229 |  |
| 16898 | Melena | SNAP25       | 0.003881 | -2.18833  |  |

|       |        |              |          |           |  |
|-------|--------|--------------|----------|-----------|--|
| 16899 | Melena | NCRNA00260   | 0.004093 | -2.186592 |  |
| 16900 | Melena | GPM6B        | 0.005321 | -2.184446 |  |
| 16901 | Melena | C4A          | 0.000394 | -2.181772 |  |
| 16902 | Melena | OR2B3        | 0.014472 | -2.170836 |  |
| 16903 | Melena | LOC644192    | 0.011201 | -2.167257 |  |
| 16904 | Melena | APOE         | 0.004404 | -2.165091 |  |
| 16905 | Melena | GTPBP1       | 0.000202 | -2.16476  |  |
| 16906 | Melena | PSG2         | 0.002592 | -2.161281 |  |
| 16907 | Melena | MAP2         | 0.013837 | -2.159646 |  |
| 16908 | Melena | NRK          | 0.002737 | -2.157668 |  |
| 16909 | Melena | OR10D1P      | 0.000005 | -2.138024 |  |
| 16910 | Melena | TTC23        | 0.00015  | -2.134911 |  |
| 16911 | Melena | PATE1        | 0.000134 | -2.134676 |  |
| 16912 | Melena | KIAA1755     | 0.000047 | -2.131913 |  |
| 16913 | Melena | GTSF1L       | 0.000325 | -2.131019 |  |
| 16914 | Melena | TNNI2        | 0.013239 | -2.123705 |  |
| 16915 | Melena | MTUS2        | 0.012319 | -2.117955 |  |
| 16916 | Melena | PRSS37       | 0.001238 | -2.117332 |  |
| 16917 | Melena | FAM124A      | 0.002405 | -2.11708  |  |
| 16918 | Melena | PDLIM3       | 0.001392 | -2.113238 |  |
| 16919 | Melena | GRIK2        | 0.014609 | -2.111409 |  |
| 16920 | Melena | PGAM2        | 0.001509 | -2.106355 |  |
| 16921 | Melena | CFC1         | 0.001962 | -2.105086 |  |
| 16922 | Melena | LMOD1        | 0.016263 | -2.092941 |  |
| 16923 | Melena | DGCR10       | 0.009464 | -2.08544  |  |
| 16924 | Melena | BGN          | 0.001219 | -2.081584 |  |
| 16925 | Melena | LOC646168    | 0.016516 | -2.079598 |  |
| 16926 | Melena | LOC100131763 | 0.001535 | -2.076241 |  |
| 16927 | Melena | FAM38B       | 0.000055 | -2.069758 |  |
| 16928 | Melena | NLGN4Y       | 0.008541 | -2.069476 |  |
| 16929 | Melena | CBLN1        | 0.006914 | -2.066759 |  |
| 16930 | Melena | MGC4294      | 0.004068 | -2.061471 |  |
| 16931 | Melena | CDK15        | 0.00835  | -2.05795  |  |
| 16932 | Melena | PDE7B        | 0.003052 | -2.054852 |  |
| 16933 | Melena | DPT          | 0.003976 | -2.053275 |  |
| 16934 | Melena | TSPY1        | 0.004097 | -2.051727 |  |
| 16935 | Melena | TMEFF2       | 0.003134 | -2.050539 |  |
| 16936 | Melena | NTNG2        | 0.003286 | -2.043375 |  |
| 16937 | Melena | GLRA2        | 0.004525 | -2.042295 |  |
| 16938 | Melena | ZNF707       | 0.005738 | -2.040481 |  |
| 16939 | Melena | KANK1        | 0.014937 | -2.032252 |  |
| 16940 | Melena | PDZK1        | 0.012877 | -2.027784 |  |
| 16941 | Melena | SLC47A1      | 0.013195 | -2.027398 |  |
| 16942 | Melena | CBLC         | 0.011334 | -2.023179 |  |
| 16943 | Melena | CES4A        | 0.002466 | -2.023083 |  |
| 16944 | Melena | MTMR7        | 0.006014 | -2.021831 |  |
| 16945 | Melena | CPEB1        | 0.000397 | -2.020517 |  |
| 16946 | Melena | KIAA0226     | 0.011334 | -2.015145 |  |
| 16947 | Melena | PNMAL1       | 0.001392 | -2.012006 |  |
| 16948 | Melena | PLCXD3       | 0.00922  | -2.009573 |  |

|       |                      |              |          |            |  |
|-------|----------------------|--------------|----------|------------|--|
| 16949 | Melena               | PEG3         | 0.007495 | -2.006987  |  |
| 16950 | Melena               | RGAG4        | 0.00835  | -2.006358  |  |
| 16951 | Melena               | LOC100507851 | 0.004068 | -2.00194   |  |
| 16952 | Melena               | BMP8A        | 0.000952 | -2.001615  |  |
| 16953 | Metastatic Carcinoma | MMP3         | 0        | -42.185084 |  |
| 16954 | Metastatic Carcinoma | ZG16         | 0        | -26.512472 |  |
| 16955 | Metastatic Carcinoma | MS4A12       | 0        | -20.652872 |  |
| 16956 | Metastatic Carcinoma | CEACAM7      | 0        | -15.920289 |  |
| 16957 | Metastatic Carcinoma | CLCA4        | 0        | -13.164673 |  |
| 16958 | Metastatic Carcinoma | PLIN1        | 0.001476 | -11.891684 |  |
| 16959 | Metastatic Carcinoma | UGT2B17      | 0        | -9.955452  |  |
| 16960 | Metastatic Carcinoma | FAM55D       | 0        | -8.813167  |  |
| 16961 | Metastatic Carcinoma | LBP          | 0.018054 | -8.475955  |  |
| 16962 | Metastatic Carcinoma | MMP1         | 0        | -8.123524  |  |
| 16963 | Metastatic Carcinoma | ASCL2        | 0        | -7.340432  |  |
| 16964 | Metastatic Carcinoma | LOC646627    | 0        | -6.99836   |  |
| 16965 | Metastatic Carcinoma | CST1         | 0        | -6.958478  |  |
| 16966 | Metastatic Carcinoma | CA4          | 0        | -6.524388  |  |
| 16967 | Metastatic Carcinoma | CCL20        | 0        | -6.503237  |  |
| 16968 | Metastatic Carcinoma | PLIN4        | 0.005948 | -5.667384  |  |
| 16969 | Metastatic Carcinoma | ADIPOQ       | 0.000853 | -5.642681  |  |
| 16970 | Metastatic Carcinoma | AQP8         | 0.00004  | -5.63299   |  |
| 16971 | Metastatic Carcinoma | FABP4        | 0.000342 | -5.49393   |  |
| 16972 | Metastatic Carcinoma | PCK1         | 0        | -5.335896  |  |
| 16973 | Metastatic Carcinoma | NOX1         | 0.000064 | -5.273299  |  |
| 16974 | Metastatic Carcinoma | IL8          | 0.000015 | -5.161208  |  |
| 16975 | Metastatic Carcinoma | GUCA2B       | 0.000001 | -5.066255  |  |
| 16976 | Metastatic Carcinoma | MXD1         | 0        | -4.929587  |  |
| 16977 | Metastatic Carcinoma | CXCL3        | 0        | -4.925059  |  |
| 16978 | Metastatic Carcinoma | IGHG1        | 0        | -4.899017  |  |
| 16979 | Metastatic Carcinoma | GUCA2A       | 0        | -4.357917  |  |
| 16980 | Metastatic Carcinoma | GPR109B      | 0.000139 | -4.295004  |  |
| 16981 | Metastatic Carcinoma | MAGEA3       | 0.005832 | -4.287409  |  |
| 16982 | Metastatic Carcinoma | ADH1C        | 0.022362 | -4.285991  |  |
| 16983 | Metastatic Carcinoma | CA1          | 0.000034 | -4.241507  |  |
| 16984 | Metastatic Carcinoma | AGT          | 0.000004 | -4.12723   |  |
| 16985 | Metastatic Carcinoma | MUC12        | 0.021097 | -4.08488   |  |
| 16986 | Metastatic Carcinoma | S100B        | 0.000019 | -4.044414  |  |
| 16987 | Metastatic Carcinoma | SAA1         | 0.016341 | -4.036917  |  |
| 16988 | Metastatic Carcinoma | C1orf125     | 0        | -3.972715  |  |
| 16989 | Metastatic Carcinoma | ACSL6        | 0        | -3.905292  |  |
| 16990 | Metastatic Carcinoma | C10orf99     | 0.001678 | -3.813436  |  |
| 16991 | Metastatic Carcinoma | FLJ32063     | 0.000032 | -3.807157  |  |
| 16992 | Metastatic Carcinoma | CDHR5        | 0        | -3.724454  |  |
| 16993 | Metastatic Carcinoma | SLC26A3      | 0        | -3.71925   |  |
| 16994 | Metastatic Carcinoma | MAGEA6       | 0.015537 | -3.655734  |  |
| 16995 | Metastatic Carcinoma | MYH11        | 0.013957 | -3.631599  |  |
| 16996 | Metastatic Carcinoma | DSG3         | 0.000027 | -3.610608  |  |
| 16997 | Metastatic Carcinoma | CCL22        | 0        | -3.597257  |  |
| 16998 | Metastatic Carcinoma | CXCL1        | 0.000015 | -3.587934  |  |

|       |                      |              |          |           |  |
|-------|----------------------|--------------|----------|-----------|--|
| 16999 | Metastatic Carcinoma | MMP10        | 0        | -3.529419 |  |
| 17000 | Metastatic Carcinoma | CFTR         | 0.000012 | -3.492785 |  |
| 17001 | Metastatic Carcinoma | DHRS9        | 0.000036 | -3.370458 |  |
| 17002 | Metastatic Carcinoma | CDX2         | 0.003894 | -3.369222 |  |
| 17003 | Metastatic Carcinoma | UGT2B15      | 0.000036 | -3.357359 |  |
| 17004 | Metastatic Carcinoma | EREG         | 0.002352 | -3.339471 |  |
| 17005 | Metastatic Carcinoma | TNFSF11      | 0.000001 | -3.337225 |  |
| 17006 | Metastatic Carcinoma | HSD11B2      | 0.00001  | -3.326244 |  |
| 17007 | Metastatic Carcinoma | TDGF1        | 0.004942 | -3.276759 |  |
| 17008 | Metastatic Carcinoma | PROK2        | 0.000099 | -3.269483 |  |
| 17009 | Metastatic Carcinoma | SYNM         | 0.000201 | -3.246326 |  |
| 17010 | Metastatic Carcinoma | FSTL5        | 0.020964 | -3.212091 |  |
| 17011 | Metastatic Carcinoma | MEP1A        | 0.004731 | -3.150256 |  |
| 17012 | Metastatic Carcinoma | ATP6V1C2     | 0.001572 | -3.145924 |  |
| 17013 | Metastatic Carcinoma | PI3          | 0.006165 | -3.116435 |  |
| 17014 | Metastatic Carcinoma | AREG         | 0.017169 | -3.093726 |  |
| 17015 | Metastatic Carcinoma | GNG4         | 0.000001 | -3.078896 |  |
| 17016 | Metastatic Carcinoma | IL1B         | 0        | -3.074022 |  |
| 17017 | Metastatic Carcinoma | LGR5         | 0.007914 | -3.072151 |  |
| 17018 | Metastatic Carcinoma | TRPM6        | 0        | -3.067398 |  |
| 17019 | Metastatic Carcinoma | SLC13A3      | 0        | -3.056251 |  |
| 17020 | Metastatic Carcinoma | TRIM31       | 0.001286 | -2.947836 |  |
| 17021 | Metastatic Carcinoma | SELENBP1     | 0        | -2.922294 |  |
| 17022 | Metastatic Carcinoma | PROX1        | 0.000393 | -2.855246 |  |
| 17023 | Metastatic Carcinoma | IL11         | 0.000001 | -2.854065 |  |
| 17024 | Metastatic Carcinoma | SPAG1        | 0.000027 | -2.836507 |  |
| 17025 | Metastatic Carcinoma | SLC6A20      | 0.000145 | -2.833047 |  |
| 17026 | Metastatic Carcinoma | SATB2        | 0.001401 | -2.772726 |  |
| 17027 | Metastatic Carcinoma | LOC100288092 | 0.003541 | -2.754075 |  |
| 17028 | Metastatic Carcinoma | DNASE1       | 0.018463 | -2.708691 |  |
| 17029 | Metastatic Carcinoma | GPA33        | 0.008802 | -2.693916 |  |
| 17030 | Metastatic Carcinoma | FAM55A       | 0        | -2.69071  |  |
| 17031 | Metastatic Carcinoma | PKP1         | 0.018463 | -2.684428 |  |
| 17032 | Metastatic Carcinoma | LOC100506860 | 0.009723 | -2.674169 |  |
| 17033 | Metastatic Carcinoma | GPSM2        | 0.004614 | -2.652971 |  |
| 17034 | Metastatic Carcinoma | CLEC4G       | 0.007414 | -2.635787 |  |
| 17035 | Metastatic Carcinoma | CDHR1        | 0.000157 | -2.634172 |  |
| 17036 | Metastatic Carcinoma | NAT8         | 0.00085  | -2.634131 |  |
| 17037 | Metastatic Carcinoma | RNF43        | 0.000133 | -2.617698 |  |
| 17038 | Metastatic Carcinoma | DNASE1L3     | 0.010674 | -2.614105 |  |
| 17039 | Metastatic Carcinoma | ACE2         | 0.022362 | -2.612884 |  |
| 17040 | Metastatic Carcinoma | CLC          | 0.000034 | -2.607582 |  |
| 17041 | Metastatic Carcinoma | RHOH         | 0.000013 | -2.604483 |  |
| 17042 | Metastatic Carcinoma | DDX17        | 0.000853 | -2.584311 |  |
| 17043 | Metastatic Carcinoma | IGHA1        | 0.007222 | -2.543227 |  |
| 17044 | Metastatic Carcinoma | CAPN10       | 0.006699 | -2.536859 |  |
| 17045 | Metastatic Carcinoma | G0S2         | 0        | -2.51811  |  |
| 17046 | Metastatic Carcinoma | PCNXL3       | 0.022937 | -2.484637 |  |
| 17047 | Metastatic Carcinoma | NOTUM        | 0.009749 | -2.478713 |  |
| 17048 | Metastatic Carcinoma | ARL14        | 0.005073 | -2.478015 |  |



|       |                      |           |          |           |  |
|-------|----------------------|-----------|----------|-----------|--|
| 17049 | Metastatic Carcinoma | DDX3X     | 0.015482 | -2.4725   |  |
| 17050 | Metastatic Carcinoma | NEGR1     | 0.016485 | -2.439633 |  |
| 17051 | Metastatic Carcinoma | IL1RAPL1  | 0.002672 | -2.439588 |  |
| 17052 | Metastatic Carcinoma | PHLDA1    | 0.00127  | -2.438842 |  |
| 17053 | Metastatic Carcinoma | MYB       | 0.002422 | -2.434565 |  |
| 17054 | Metastatic Carcinoma | IL1RN     | 0.000621 | -2.426311 |  |
| 17055 | Metastatic Carcinoma | C10orf116 | 0.011016 | -2.412165 |  |
| 17056 | Metastatic Carcinoma | ODAM      | 0.012053 | -2.395621 |  |
| 17057 | Metastatic Carcinoma | CD177     | 0.00138  | -2.374753 |  |
| 17058 | Metastatic Carcinoma | SLC26A2   | 0.006401 | -2.370958 |  |
| 17059 | Metastatic Carcinoma | PRR15     | 0.008802 | -2.358376 |  |
| 17060 | Metastatic Carcinoma | CST4      | 0.001635 | -2.338289 |  |
| 17061 | Metastatic Carcinoma | PARM1     | 0.001697 | -2.335607 |  |
| 17062 | Metastatic Carcinoma | NR4A1     | 0.002308 | -2.309243 |  |
| 17063 | Metastatic Carcinoma | HBEGF     | 0.000648 | -2.307207 |  |
| 17064 | Metastatic Carcinoma | SKP2      | 0.016341 | -2.282677 |  |
| 17065 | Metastatic Carcinoma | LOC285628 | 0.021601 | -2.274329 |  |
| 17066 | Metastatic Carcinoma | BEST2     | 0.01358  | -2.264696 |  |
| 17067 | Metastatic Carcinoma | FGGY      | 0.000042 | -2.261405 |  |
| 17068 | Metastatic Carcinoma | PKP2      | 0.007657 | -2.259458 |  |
| 17069 | Metastatic Carcinoma | CFP       | 0.003705 | -2.257573 |  |
| 17070 | Metastatic Carcinoma | HR        | 0.005879 | -2.248453 |  |
| 17071 | Metastatic Carcinoma | HSPH1     | 0.010344 | -2.215763 |  |
| 17072 | Metastatic Carcinoma | PI15      | 0.000818 | -2.215594 |  |
| 17073 | Metastatic Carcinoma | RBM33     | 0.006957 | -2.211871 |  |
| 17074 | Metastatic Carcinoma | IL21R     | 0.021392 | -2.207299 |  |
| 17075 | Metastatic Carcinoma | BCL2L15   | 0.002197 | -2.193376 |  |
| 17076 | Metastatic Carcinoma | CLIC5     | 0.000024 | -2.182391 |  |
| 17077 | Metastatic Carcinoma | GRIK4     | 0.00094  | -2.170083 |  |
| 17078 | Metastatic Carcinoma | LOC25845  | 0.020904 | -2.163282 |  |
| 17079 | Metastatic Carcinoma | LRRC2     | 0.022352 | -2.156873 |  |
| 17080 | Metastatic Carcinoma | MIER3     | 0.000161 | -2.148694 |  |
| 17081 | Metastatic Carcinoma | KLF5      | 0.014547 | -2.147231 |  |
| 17082 | Metastatic Carcinoma | ZFP36L2   | 0.00085  | -2.142224 |  |
| 17083 | Metastatic Carcinoma | ABCB11    | 0.00368  | -2.137852 |  |
| 17084 | Metastatic Carcinoma | IL24      | 0.008149 | -2.137242 |  |
| 17085 | Metastatic Carcinoma | ACVRL1    | 0.001808 | -2.130668 |  |
| 17086 | Metastatic Carcinoma | IL33      | 0.001808 | -2.125832 |  |
| 17087 | Metastatic Carcinoma | CST2      | 0.019868 | -2.12506  |  |
| 17088 | Metastatic Carcinoma | FUT4      | 0.020291 | -2.122425 |  |
| 17089 | Metastatic Carcinoma | CYP4F3    | 0.011991 | -2.122185 |  |
| 17090 | Metastatic Carcinoma | NEK3      | 0.003129 | -2.116361 |  |
| 17091 | Metastatic Carcinoma | SCML1     | 0.000431 | -2.110679 |  |
| 17092 | Metastatic Carcinoma | MYOCD     | 0.022717 | -2.105389 |  |
| 17093 | Metastatic Carcinoma | HEPACAM   | 0.009626 | -2.103795 |  |
| 17094 | Metastatic Carcinoma | LCK       | 0.003276 | -2.09352  |  |
| 17095 | Metastatic Carcinoma | GPAM      | 0.001236 | -2.092237 |  |
| 17096 | Metastatic Carcinoma | ENPP3     | 0.012155 | -2.088685 |  |
| 17097 | Metastatic Carcinoma | ACSL5     | 0.008439 | -2.087155 |  |
| 17098 | Metastatic Carcinoma | GTF2F2    | 0.000139 | -2.082201 |  |

|       |                      |           |          |             |  |
|-------|----------------------|-----------|----------|-------------|--|
| 17099 | Metastatic Carcinoma | MCOLN2    | 0.00085  | -2.079015   |  |
| 17100 | Metastatic Carcinoma | UCHL3     | 0.000086 | -2.073443   |  |
| 17101 | Metastatic Carcinoma | LOC284801 | 0.018054 | -2.069469   |  |
| 17102 | Metastatic Carcinoma | FOXP2     | 0.012017 | -2.067579   |  |
| 17103 | Metastatic Carcinoma | PDE4B     | 0.000007 | -2.04567    |  |
| 17104 | Metastatic Carcinoma | DGAT2     | 0.011239 | -2.042118   |  |
| 17105 | Metastatic Carcinoma | STAMBPL1  | 0.004161 | -2.038423   |  |
| 17106 | Metastatic Carcinoma | BMP2      | 0.001116 | -2.036493   |  |
| 17107 | Metastatic Carcinoma | SLMO2     | 0.000055 | -2.012657   |  |
| 17108 | Metastatic Carcinoma | FAR2      | 0.00951  | -2.003805   |  |
| 17109 | Methionine           | ITLN1     | 0        | -292.109149 |  |
| 17110 | Methionine           | C6orf105  | 0.000006 | -104.893373 |  |
| 17111 | Methionine           | CA2       | 0.000001 | -88.178809  |  |
| 17112 | Methionine           | MS4A12    | 0.000002 | -16.670782  |  |
| 17113 | Methionine           | IGJ       | 0.000004 | -11.651369  |  |
| 17114 | Methionine           | FRMD3     | 0.000006 | -6.633007   |  |
| 17115 | Methionine           | GSR       | 0.000011 | -5.729375   |  |
| 17116 | Methionine           | CA4       | 0.000001 | -5.632541   |  |
| 17117 | Methionine           | NTN2L     | 0.000006 | -5.322837   |  |
| 17118 | Methionine           | HLA-C     | 0.000011 | -5.090134   |  |
| 17119 | Methionine           | GUCA2A    | 0.000002 | -4.858079   |  |
| 17120 | Methionine           | SPINK4    | 0.000001 | -3.238074   |  |
| 17121 | Methionine           | PIGR      | 0        | -2.867408   |  |
| 17122 | Methionine           | SPARCL1   | 0.000018 | -2.801931   |  |
| 17123 | Methionine           | FCGBP     | 0        | -2.719633   |  |
| 17124 | Methionine           | IGHA1     | 0.000001 | -2.6695     |  |
| 17125 | Methionine           | ELOVL6    | 0        | -2.453167   |  |
| 17126 | Methionine           | KIAA0828  | 0        | -2.389916   |  |
| 17127 | Methionine           | HMGCR     | 0.000015 | -2.289966   |  |
| 17128 | Methionine           | FAM46C    | 0.000005 | -2.22057    |  |
| 17129 | Methionine           | CCDC93    | 0        | 2.078317    |  |
| 17130 | Methionine           | KLF7      | 0.000006 | 2.092401    |  |
| 17131 | Methionine           | TMEM49    | 0        | 2.095377    |  |
| 17132 | Methionine           | USP34     | 0.000005 | 2.109417    |  |
| 17133 | Methionine           | SERINC5   | 0.000004 | 2.188872    |  |
| 17134 | Methionine           | EML4      | 0        | 2.191544    |  |
| 17135 | Methionine           | ARHGEF2   | 0.000016 | 2.197076    |  |
| 17136 | Methionine           | MPHOSPH8  | 0.000004 | 2.214199    |  |
| 17137 | Methionine           | NNMT      | 0.000001 | 2.298865    |  |
| 17138 | Methionine           | DGKH      | 0.000001 | 2.302271    |  |
| 17139 | Methionine           | LOC727820 | 0        | 2.307956    |  |
| 17140 | Methionine           | MGC16384  | 0.000006 | 2.346782    |  |
| 17141 | Methionine           | COL1A1    | 0        | 2.395517    |  |
| 17142 | Methionine           | CSNK1A1   | 0.000004 | 2.40641     |  |
| 17143 | Methionine           | NRBP2     | 0        | 2.409324    |  |
| 17144 | Methionine           | CLK1      | 0.000007 | 2.490114    |  |
| 17145 | Methionine           | SFRS18    | 0        | 2.509521    |  |
| 17146 | Methionine           | EIF3B     | 0.000014 | 2.53144     |  |
| 17147 | Methionine           | NSFL1C    | 0.000011 | 2.537637    |  |
| 17148 | Methionine           | C4orf30   | 0.000017 | 2.621492    |  |

|       |                            |              |          |            |  |
|-------|----------------------------|--------------|----------|------------|--|
| 17149 | Methionine                 | FOXJ3        | 0.000019 | 2.674279   |  |
| 17150 | Methionine                 | RP11-298P3.3 | 0.000001 | 2.733297   |  |
| 17151 | Methionine                 | AKAP8L       | 0.000016 | 2.772168   |  |
| 17152 | Methionine                 | FNBP4        | 0        | 2.773925   |  |
| 17153 | Methionine                 | ZNF83        | 0.000021 | 2.8262     |  |
| 17154 | Methionine                 | VPS13C       | 0.000001 | 2.860054   |  |
| 17155 | Methionine                 | LOC26010     | 0.000013 | 2.919209   |  |
| 17156 | Methionine                 | YAP1         | 0.000001 | 3.066516   |  |
| 17157 | Methionine                 | ZNF207       | 0.000004 | 3.084116   |  |
| 17158 | Methionine                 | C7orf54      | 0.000012 | 3.097033   |  |
| 17159 | Methionine                 | ZNF364       | 0.000009 | 3.107203   |  |
| 17160 | Methionine                 | RBM39        | 0.000001 | 3.303166   |  |
| 17161 | Methionine                 | MGC23985     | 0.000004 | 3.382113   |  |
| 17162 | Methionine                 | U2AF1        | 0.000002 | 3.513583   |  |
| 17163 | Methionine                 | CHD2         | 0.00001  | 3.596148   |  |
| 17164 | Methionine                 | THBS2        | 0        | 3.628814   |  |
| 17165 | Methionine                 | SYK          | 0.000006 | 3.751209   |  |
| 17166 | Methionine                 | GTF3A        | 0.000012 | 3.956153   |  |
| 17167 | Methionine                 | TBRG1        | 0        | 4.005367   |  |
| 17168 | Methionine                 | SNAPC3       | 0.000002 | 4.188509   |  |
| 17169 | Methionine                 | CCNL1        | 0.000021 | 4.215768   |  |
| 17170 | Methionine                 | C11orf58     | 0.000007 | 4.378468   |  |
| 17171 | Methionine                 | SMURF2       | 0.000012 | 4.524036   |  |
| 17172 | Methionine                 | GLUD1        | 0.000014 | 4.578576   |  |
| 17173 | Methionine                 | ZNF785       | 0.000008 | 4.674523   |  |
| 17174 | Methionine                 | IFNGR1       | 0        | 4.786103   |  |
| 17175 | Methionine                 | PCF11        | 0.000007 | 4.990015   |  |
| 17176 | Methionine                 | PICALM       | 0.000013 | 5.138198   |  |
| 17177 | Methionine                 | KIAA0907     | 0.000007 | 5.62551    |  |
| 17178 | Methionine                 | SPP1         | 0        | 5.857485   |  |
| 17179 | Methionine                 | ZNF638       | 0        | 5.912399   |  |
| 17180 | Methionine                 | LOC440354    | 0.000014 | 6.198988   |  |
| 17181 | Methionine                 | ZMYND8       | 0.000009 | 6.92901    |  |
| 17182 | Methionine                 | MBNL2        | 0        | 7.194229   |  |
| 17183 | Methionine                 | C10orf10     | 0.000003 | 7.305578   |  |
| 17184 | Methionine                 | MEGF6        | 0.000022 | 7.507018   |  |
| 17185 | Methionine                 | KIAA0368     | 0        | 9.302099   |  |
| 17186 | Methionine                 | XPO1         | 0.000002 | 10.357944  |  |
| 17187 | Methionine                 | CFLAR        | 0.000011 | 11.328732  |  |
| 17188 | Methionine                 | GART         | 0.000001 | 15.363893  |  |
| 17189 | Methionine                 | ZBTB20       | 0.000004 | 17.367361  |  |
| 17190 | Methionine                 | ZFAND6       | 0.000004 | 17.449033  |  |
| 17191 | Methionine                 | PIAS1        | 0.000009 | 18.056731  |  |
| 17192 | Methionine                 | ASXL1        | 0        | 20.752404  |  |
| 17193 | Methionine                 | UBC          | 0.000009 | 23.283036  |  |
| 17194 | Methionine                 | SLC22A3      | 0        | 141.230932 |  |
| 17195 | Methionine                 | PHKB         | 0        | 201.69213  |  |
| 17196 | Microsatellite Instability | SLC26A3      | 0.000001 | -39.432581 |  |
| 17197 | Microsatellite Instability | GUCA2A       | 0        | -16.294008 |  |
| 17198 | Microsatellite Instability | KRT23        | 0.031055 | -13.498961 |  |

|       |                            |              |          |            |  |
|-------|----------------------------|--------------|----------|------------|--|
| 17199 | Microsatellite Instability | MYH11        | 0.000001 | -12.464317 |  |
| 17200 | Microsatellite Instability | CHRM3        | 0.038848 | -5.36188   |  |
| 17201 | Microsatellite Instability | AMACR        | 0.013025 | -3.921634  |  |
| 17202 | Microsatellite Instability | DST          | 0        | -3.84509   |  |
| 17203 | Microsatellite Instability | SEMA5A       | 0.031272 | -3.759141  |  |
| 17204 | Microsatellite Instability | MUC20        | 0.015636 | -3.733484  |  |
| 17205 | Microsatellite Instability | TOB1         | 0.034358 | -3.662296  |  |
| 17206 | Microsatellite Instability | AMT          | 0.038194 | -3.50289   |  |
| 17207 | Microsatellite Instability | MGLL         | 0        | -3.330854  |  |
| 17208 | Microsatellite Instability | SHROOM4      | 0.012577 | -3.132474  |  |
| 17209 | Microsatellite Instability | PLAGL2       | 0.049045 | -3.10742   |  |
| 17210 | Microsatellite Instability | SPIRE2       | 0.04666  | -2.907811  |  |
| 17211 | Microsatellite Instability | NUDT7        | 0.038848 | -2.789623  |  |
| 17212 | Microsatellite Instability | AXIN2        | 0.034678 | -2.724455  |  |
| 17213 | Microsatellite Instability | DHRS12       | 0.044875 | -2.469173  |  |
| 17214 | Microsatellite Instability | KCNE3        | 0.040552 | -2.459474  |  |
| 17215 | Microsatellite Instability | LOC100292959 | 0.037228 | -2.424323  |  |
| 17216 | Microsatellite Instability | MBTD1        | 0.007661 | -2.387456  |  |
| 17217 | Microsatellite Instability | C10orf47     | 0.04666  | -2.365174  |  |
| 17218 | Microsatellite Instability | SYNJ2        | 0.004314 | -2.171962  |  |
| 17219 | Microsatellite Instability | LPAR1        | 0        | -2.101231  |  |
| 17220 | Microsatellite Instability | RAP2A        | 0.004876 | -2.069568  |  |
| 17221 | Microsatellite Instability | CAMKK2       | 0.004876 | -2.058886  |  |
| 17222 | Microsatellite Instability | TXNDC9       | 0.034502 | -2.032892  |  |
| 17223 | Microsatellite Instability | CBX3         | 0.000002 | 2.001406   |  |
| 17224 | Microsatellite Instability | LONP1        | 0        | 2.008715   |  |
| 17225 | Microsatellite Instability | MTA2         | 0.000001 | 2.010076   |  |
| 17226 | Microsatellite Instability | KIF15        | 0        | 2.015372   |  |
| 17227 | Microsatellite Instability | GOLT1B       | 0        | 2.015554   |  |
| 17228 | Microsatellite Instability | RIPK2        | 0        | 2.016821   |  |
| 17229 | Microsatellite Instability | MTERFD1      | 0.000001 | 2.018794   |  |
| 17230 | Microsatellite Instability | KIF11        | 0.000001 | 2.025286   |  |
| 17231 | Microsatellite Instability | NUP107       | 0        | 2.028406   |  |
| 17232 | Microsatellite Instability | CCDC59       | 0        | 2.030633   |  |
| 17233 | Microsatellite Instability | SET          | 0        | 2.042096   |  |
| 17234 | Microsatellite Instability | TIMELESS     | 0        | 2.051896   |  |
| 17235 | Microsatellite Instability | OIP5         | 0.000001 | 2.065998   |  |
| 17236 | Microsatellite Instability | RUVBL1       | 0        | 2.069813   |  |
| 17237 | Microsatellite Instability | NUP205       | 0.000001 | 2.074642   |  |
| 17238 | Microsatellite Instability | STT3A        | 0        | 2.077468   |  |
| 17239 | Microsatellite Instability | ENO1         | 0.000002 | 2.078688   |  |
| 17240 | Microsatellite Instability | RUVBL2       | 0        | 2.080554   |  |
| 17241 | Microsatellite Instability | SMCHD1       | 0.016022 | 2.088014   |  |
| 17242 | Microsatellite Instability | NUCB2        | 0.038592 | 2.090244   |  |
| 17243 | Microsatellite Instability | RFC5         | 0.000001 | 2.096438   |  |
| 17244 | Microsatellite Instability | EPPK1        | 0.000001 | 2.101393   |  |
| 17245 | Microsatellite Instability | SLC25A32     | 0.000001 | 2.113102   |  |
| 17246 | Microsatellite Instability | GINS2        | 0.000001 | 2.11675    |  |
| 17247 | Microsatellite Instability | NUP85        | 0.000001 | 2.11777    |  |
| 17248 | Microsatellite Instability | RBM28        | 0        | 2.120363   |  |

|       |                            |          |          |          |  |
|-------|----------------------------|----------|----------|----------|--|
| 17249 | Microsatellite Instability | NCAPG2   | 0        | 2.125408 |  |
| 17250 | Microsatellite Instability | CAD      | 0.000001 | 2.127343 |  |
| 17251 | Microsatellite Instability | GTF2IRD1 | 0        | 2.133547 |  |
| 17252 | Microsatellite Instability | FANCL    | 0        | 2.139324 |  |
| 17253 | Microsatellite Instability | GZMB     | 0        | 2.14732  |  |
| 17254 | Microsatellite Instability | KCNRG    | 0.031716 | 2.151451 |  |
| 17255 | Microsatellite Instability | KIF2C    | 0.000001 | 2.154208 |  |
| 17256 | Microsatellite Instability | OAS3     | 0.000001 | 2.155018 |  |
| 17257 | Microsatellite Instability | FANCG    | 0        | 2.166676 |  |
| 17258 | Microsatellite Instability | CCL4     | 0        | 2.174968 |  |
| 17259 | Microsatellite Instability | RAB15    | 0        | 2.188293 |  |
| 17260 | Microsatellite Instability | JAG2     | 0.000001 | 2.191192 |  |
| 17261 | Microsatellite Instability | RPL22L1  | 0.04666  | 2.194733 |  |
| 17262 | Microsatellite Instability | WDR43    | 0.000001 | 2.194866 |  |
| 17263 | Microsatellite Instability | POLR1D   | 0.000001 | 2.252838 |  |
| 17264 | Microsatellite Instability | NUP37    | 0.000001 | 2.262069 |  |
| 17265 | Microsatellite Instability | FUT8     | 0        | 2.267452 |  |
| 17266 | Microsatellite Instability | PITX1    | 0.000001 | 2.26755  |  |
| 17267 | Microsatellite Instability | KIF20A   | 0        | 2.295043 |  |
| 17268 | Microsatellite Instability | MICB     | 0        | 2.307009 |  |
| 17269 | Microsatellite Instability | HS2ST1   | 0.000002 | 2.328743 |  |
| 17270 | Microsatellite Instability | CBFB     | 0        | 2.334836 |  |
| 17271 | Microsatellite Instability | CDC42EP1 | 0.000001 | 2.339437 |  |
| 17272 | Microsatellite Instability | SORD     | 0.000001 | 2.341712 |  |
| 17273 | Microsatellite Instability | MRPS17   | 0.000001 | 2.391333 |  |
| 17274 | Microsatellite Instability | NOP56    | 0.000001 | 2.40229  |  |
| 17275 | Microsatellite Instability | ZWILCH   | 0        | 2.403617 |  |
| 17276 | Microsatellite Instability | ARNTL2   | 0        | 2.425129 |  |
| 17277 | Microsatellite Instability | PSAT1    | 0.000001 | 2.45864  |  |
| 17278 | Microsatellite Instability | NFE2L3   | 0        | 2.463088 |  |
| 17279 | Microsatellite Instability | CSE1L    | 0.000001 | 2.467005 |  |
| 17280 | Microsatellite Instability | C12orf11 | 0        | 2.477935 |  |
| 17281 | Microsatellite Instability | VAR5     | 0        | 2.490948 |  |
| 17282 | Microsatellite Instability | ICAM1    | 0        | 2.498583 |  |
| 17283 | Microsatellite Instability | MCM7     | 0        | 2.562626 |  |
| 17284 | Microsatellite Instability | UBE2L6   | 0.000001 | 2.570384 |  |
| 17285 | Microsatellite Instability | PSMG1    | 0.000001 | 2.572526 |  |
| 17286 | Microsatellite Instability | CDC6     | 0        | 2.585624 |  |
| 17287 | Microsatellite Instability | AHCY     | 0.000002 | 2.587594 |  |
| 17288 | Microsatellite Instability | CCNA2    | 0.000001 | 2.6516   |  |
| 17289 | Microsatellite Instability | BOP1     | 0        | 2.693284 |  |
| 17290 | Microsatellite Instability | GBP1     | 0        | 2.698104 |  |
| 17291 | Microsatellite Instability | CDC25B   | 0.000001 | 2.70041  |  |
| 17292 | Microsatellite Instability | C7orf68  | 0.000001 | 2.713761 |  |
| 17293 | Microsatellite Instability | RFC3     | 0        | 2.720527 |  |
| 17294 | Microsatellite Instability | EIF5A    | 0        | 2.754041 |  |
| 17295 | Microsatellite Instability | FEN1     | 0.000001 | 2.754245 |  |
| 17296 | Microsatellite Instability | TEAD4    | 0.000001 | 2.833619 |  |
| 17297 | Microsatellite Instability | LGR5     | 0.000001 | 2.855969 |  |
| 17298 | Microsatellite Instability | LMNB2    | 0        | 2.858719 |  |

|       |                            |          |          |            |  |
|-------|----------------------------|----------|----------|------------|--|
| 17299 | Microsatellite Instability | NT5DC2   | 0        | 2.876001   |  |
| 17300 | Microsatellite Instability | HNRNPL   | 0        | 2.905758   |  |
| 17301 | Microsatellite Instability | SLC7A5   | 0.000001 | 2.932664   |  |
| 17302 | Microsatellite Instability | SHMT2    | 0        | 2.982462   |  |
| 17303 | Microsatellite Instability | KIF4A    | 0.000001 | 3.052197   |  |
| 17304 | Microsatellite Instability | GINS1    | 0        | 3.07162    |  |
| 17305 | Microsatellite Instability | F12      | 0        | 3.082553   |  |
| 17306 | Microsatellite Instability | STAT1    | 0        | 3.107809   |  |
| 17307 | Microsatellite Instability | TRIP13   | 0        | 3.129853   |  |
| 17308 | Microsatellite Instability | ASPHD2   | 0.021281 | 3.136229   |  |
| 17309 | Microsatellite Instability | NUTF2    | 0        | 3.241433   |  |
| 17310 | Microsatellite Instability | CEP55    | 0        | 3.248565   |  |
| 17311 | Microsatellite Instability | SOD2     | 0        | 3.254564   |  |
| 17312 | Microsatellite Instability | FOXMI    | 0        | 3.25519    |  |
| 17313 | Microsatellite Instability | MCM4     | 0        | 3.415645   |  |
| 17314 | Microsatellite Instability | TACSTD2  | 0        | 3.446898   |  |
| 17315 | Microsatellite Instability | MIF      | 0.000001 | 3.504093   |  |
| 17316 | Microsatellite Instability | PBK      | 0.000001 | 3.714962   |  |
| 17317 | Microsatellite Instability | ECT2     | 0        | 3.796085   |  |
| 17318 | Microsatellite Instability | TMEM97   | 0        | 3.826889   |  |
| 17319 | Microsatellite Instability | PMAIP1   | 0        | 4.0525     |  |
| 17320 | Microsatellite Instability | CXCL9    | 0        | 4.116745   |  |
| 17321 | Microsatellite Instability | IFITM1   | 0        | 4.28338    |  |
| 17322 | Microsatellite Instability | CXCL10   | 0        | 4.8737     |  |
| 17323 | Microsatellite Instability | CXCL1    | 0        | 5.226033   |  |
| 17324 | Microsatellite Instability | SRSF6    | 0.000001 | 6.156758   |  |
| 17325 | Microsatellite Instability | MMP12    | 0        | 6.617377   |  |
| 17326 | Microsatellite Instability | CXCL3    | 0        | 7.233392   |  |
| 17327 | Microsatellite Instability | SPP1     | 0        | 7.465531   |  |
| 17328 | Microsatellite Repeat      | SLC26A3  | 0.000001 | -39.432581 |  |
| 17329 | Microsatellite Repeat      | GUCA2A   | 0        | -16.294008 |  |
| 17330 | Microsatellite Repeat      | MYH11    | 0.000001 | -12.464317 |  |
| 17331 | Microsatellite Repeat      | DST      | 0        | -3.84509   |  |
| 17332 | Microsatellite Repeat      | MGLL     | 0        | -3.330854  |  |
| 17333 | Microsatellite Repeat      | LPAR1    | 0        | -2.101231  |  |
| 17334 | Microsatellite Repeat      | CBX3     | 0.000002 | 2.001406   |  |
| 17335 | Microsatellite Repeat      | LONP1    | 0        | 2.008715   |  |
| 17336 | Microsatellite Repeat      | MTA2     | 0.000001 | 2.010076   |  |
| 17337 | Microsatellite Repeat      | KIF15    | 0        | 2.015372   |  |
| 17338 | Microsatellite Repeat      | GOLT1B   | 0        | 2.015554   |  |
| 17339 | Microsatellite Repeat      | RIPK2    | 0        | 2.016821   |  |
| 17340 | Microsatellite Repeat      | MTERFD1  | 0.000001 | 2.018794   |  |
| 17341 | Microsatellite Repeat      | KIF11    | 0.000001 | 2.025286   |  |
| 17342 | Microsatellite Repeat      | NUP107   | 0        | 2.028406   |  |
| 17343 | Microsatellite Repeat      | CCDC59   | 0        | 2.030633   |  |
| 17344 | Microsatellite Repeat      | SET      | 0        | 2.042096   |  |
| 17345 | Microsatellite Repeat      | TIMELESS | 0        | 2.051896   |  |
| 17346 | Microsatellite Repeat      | OIP5     | 0.000001 | 2.065998   |  |
| 17347 | Microsatellite Repeat      | RUVBL1   | 0        | 2.069813   |  |
| 17348 | Microsatellite Repeat      | NUP205   | 0.000001 | 2.074642   |  |

|       |                       |          |          |          |  |
|-------|-----------------------|----------|----------|----------|--|
| 17349 | Microsatellite Repeat | STT3A    | 0        | 2.077468 |  |
| 17350 | Microsatellite Repeat | ENO1     | 0.000002 | 2.078688 |  |
| 17351 | Microsatellite Repeat | RUVBL2   | 0        | 2.080554 |  |
| 17352 | Microsatellite Repeat | RFC5     | 0.000001 | 2.096438 |  |
| 17353 | Microsatellite Repeat | EPPK1    | 0.000001 | 2.101393 |  |
| 17354 | Microsatellite Repeat | SLC25A32 | 0.000001 | 2.113102 |  |
| 17355 | Microsatellite Repeat | GIN52    | 0.000001 | 2.11675  |  |
| 17356 | Microsatellite Repeat | NUP85    | 0.000001 | 2.11777  |  |
| 17357 | Microsatellite Repeat | RBM28    | 0        | 2.120363 |  |
| 17358 | Microsatellite Repeat | NCAPG2   | 0        | 2.125408 |  |
| 17359 | Microsatellite Repeat | CAD      | 0.000001 | 2.127343 |  |
| 17360 | Microsatellite Repeat | GTF2IRD1 | 0        | 2.133547 |  |
| 17361 | Microsatellite Repeat | FANCL    | 0        | 2.139324 |  |
| 17362 | Microsatellite Repeat | GZMB     | 0        | 2.14732  |  |
| 17363 | Microsatellite Repeat | KIF2C    | 0.000001 | 2.154208 |  |
| 17364 | Microsatellite Repeat | OAS3     | 0.000001 | 2.155018 |  |
| 17365 | Microsatellite Repeat | FANCG    | 0        | 2.166676 |  |
| 17366 | Microsatellite Repeat | CCL4     | 0        | 2.174968 |  |
| 17367 | Microsatellite Repeat | RAB15    | 0        | 2.188293 |  |
| 17368 | Microsatellite Repeat | JAG2     | 0.000001 | 2.191192 |  |
| 17369 | Microsatellite Repeat | WDR43    | 0.000001 | 2.194866 |  |
| 17370 | Microsatellite Repeat | POLR1D   | 0.000001 | 2.252838 |  |
| 17371 | Microsatellite Repeat | NUP37    | 0.000001 | 2.262069 |  |
| 17372 | Microsatellite Repeat | FUT8     | 0        | 2.267452 |  |
| 17373 | Microsatellite Repeat | PITX1    | 0.000001 | 2.26755  |  |
| 17374 | Microsatellite Repeat | KIF20A   | 0        | 2.295043 |  |
| 17375 | Microsatellite Repeat | MICB     | 0        | 2.307009 |  |
| 17376 | Microsatellite Repeat | HS2ST1   | 0.000002 | 2.328743 |  |
| 17377 | Microsatellite Repeat | CBFB     | 0        | 2.334836 |  |
| 17378 | Microsatellite Repeat | CDC42EP1 | 0.000001 | 2.339437 |  |
| 17379 | Microsatellite Repeat | SORD     | 0.000001 | 2.341712 |  |
| 17380 | Microsatellite Repeat | MRPS17   | 0.000001 | 2.391333 |  |
| 17381 | Microsatellite Repeat | NOP56    | 0.000001 | 2.40229  |  |
| 17382 | Microsatellite Repeat | ZWILCH   | 0        | 2.403617 |  |
| 17383 | Microsatellite Repeat | ARNTL2   | 0        | 2.425129 |  |
| 17384 | Microsatellite Repeat | PSAT1    | 0.000001 | 2.45864  |  |
| 17385 | Microsatellite Repeat | NFE2L3   | 0        | 2.463088 |  |
| 17386 | Microsatellite Repeat | CSE1L    | 0.000001 | 2.467005 |  |
| 17387 | Microsatellite Repeat | C12orf11 | 0        | 2.477935 |  |
| 17388 | Microsatellite Repeat | VAR5     | 0        | 2.490948 |  |
| 17389 | Microsatellite Repeat | ICAM1    | 0        | 2.498583 |  |
| 17390 | Microsatellite Repeat | MCM7     | 0        | 2.562626 |  |
| 17391 | Microsatellite Repeat | UBE2L6   | 0.000001 | 2.570384 |  |
| 17392 | Microsatellite Repeat | PSMG1    | 0.000001 | 2.572526 |  |
| 17393 | Microsatellite Repeat | CDC6     | 0        | 2.585624 |  |
| 17394 | Microsatellite Repeat | AHCY     | 0.000002 | 2.587594 |  |
| 17395 | Microsatellite Repeat | CCNA2    | 0.000001 | 2.6516   |  |
| 17396 | Microsatellite Repeat | BOP1     | 0        | 2.693284 |  |
| 17397 | Microsatellite Repeat | GBP1     | 0        | 2.698104 |  |
| 17398 | Microsatellite Repeat | CDC25B   | 0.000001 | 2.70041  |  |

|       |                         |          |          |           |  |
|-------|-------------------------|----------|----------|-----------|--|
| 17399 | Microsatellite Repeat   | C7orf68  | 0.000001 | 2.713761  |  |
| 17400 | Microsatellite Repeat   | RFC3     | 0        | 2.720527  |  |
| 17401 | Microsatellite Repeat   | EIF5A    | 0        | 2.754041  |  |
| 17402 | Microsatellite Repeat   | FEN1     | 0.000001 | 2.754245  |  |
| 17403 | Microsatellite Repeat   | TEAD4    | 0.000001 | 2.833619  |  |
| 17404 | Microsatellite Repeat   | LGR5     | 0.000001 | 2.855969  |  |
| 17405 | Microsatellite Repeat   | LMNB2    | 0        | 2.858719  |  |
| 17406 | Microsatellite Repeat   | NT5DC2   | 0        | 2.876001  |  |
| 17407 | Microsatellite Repeat   | HNRNPL   | 0        | 2.905758  |  |
| 17408 | Microsatellite Repeat   | SLC7A5   | 0.000001 | 2.932664  |  |
| 17409 | Microsatellite Repeat   | SHMT2    | 0        | 2.982462  |  |
| 17410 | Microsatellite Repeat   | KIF4A    | 0.000001 | 3.052197  |  |
| 17411 | Microsatellite Repeat   | GINS1    | 0        | 3.07162   |  |
| 17412 | Microsatellite Repeat   | F12      | 0        | 3.082553  |  |
| 17413 | Microsatellite Repeat   | STAT1    | 0        | 3.107809  |  |
| 17414 | Microsatellite Repeat   | TRIP13   | 0        | 3.129853  |  |
| 17415 | Microsatellite Repeat   | NUTF2    | 0        | 3.241433  |  |
| 17416 | Microsatellite Repeat   | CEP55    | 0        | 3.248565  |  |
| 17417 | Microsatellite Repeat   | SOD2     | 0        | 3.254564  |  |
| 17418 | Microsatellite Repeat   | FOXMI    | 0        | 3.25519   |  |
| 17419 | Microsatellite Repeat   | MCM4     | 0        | 3.415645  |  |
| 17420 | Microsatellite Repeat   | TACSTD2  | 0        | 3.446898  |  |
| 17421 | Microsatellite Repeat   | MIF      | 0.000001 | 3.504093  |  |
| 17422 | Microsatellite Repeat   | PBK      | 0.000001 | 3.714962  |  |
| 17423 | Microsatellite Repeat   | ECT2     | 0        | 3.796085  |  |
| 17424 | Microsatellite Repeat   | TMEM97   | 0        | 3.826889  |  |
| 17425 | Microsatellite Repeat   | PMAIP1   | 0        | 4.0525    |  |
| 17426 | Microsatellite Repeat   | CXCL9    | 0        | 4.116745  |  |
| 17427 | Microsatellite Repeat   | IFITM1   | 0        | 4.28338   |  |
| 17428 | Microsatellite Repeat   | CXCL10   | 0        | 4.8737    |  |
| 17429 | Microsatellite Repeat   | CXCL1    | 0        | 5.226033  |  |
| 17430 | Microsatellite Repeat   | SRSF6    | 0.000001 | 6.156758  |  |
| 17431 | Microsatellite Repeat   | MMP12    | 0        | 6.617377  |  |
| 17432 | Microsatellite Repeat   | CXCL3    | 0        | 7.233392  |  |
| 17433 | Microsatellite Repeat   | SPP1     | 0        | 7.465531  |  |
| 17434 | Mild asthma             | XIST     | 0        | 1.981451  |  |
| 17435 | monoclonal antibody CAL | COL3A1   | 0.000526 | -3.226991 |  |
| 17436 | monoclonal antibody CAL | AFF4     | 0        | -2.612971 |  |
| 17437 | monoclonal antibody CAL | C7orf44  | 0.000036 | -2.449435 |  |
| 17438 | monoclonal antibody CAL | JMJD1C   | 0.000019 | -2.224513 |  |
| 17439 | monoclonal antibody CAL | TMEM43   | 0.000012 | -2.17963  |  |
| 17440 | monoclonal antibody CAL | PLD1     | 0.000374 | -2.179092 |  |
| 17441 | monoclonal antibody CAL | TRAPPC10 | 0.000044 | -2.17602  |  |
| 17442 | monoclonal antibody CAL | GSPT1    | 0.000206 | -2.157966 |  |
| 17443 | monoclonal antibody CAL | VPS13C   | 0.000036 | -2.152    |  |
| 17444 | monoclonal antibody CAL | MGEA5    | 0.000008 | -2.134887 |  |
| 17445 | monoclonal antibody CAL | PELI1    | 0.000503 | -2.078611 |  |
| 17446 | monoclonal antibody CAL | RNF213   | 0.001452 | -2.057288 |  |
| 17447 | monoclonal antibody CAL | DNAJC7   | 0.000133 | -2.055506 |  |
| 17448 | monoclonal antibody CAL | ZNF638   | 0.000158 | -2.053607 |  |



|       |                         |           |          |             |  |
|-------|-------------------------|-----------|----------|-------------|--|
| 17449 | monoclonal antibody CAL | RUFY2     | 0.000101 | -2.049441   |  |
| 17450 | monoclonal antibody CAL | LPP       | 0.000015 | -2.030402   |  |
| 17451 | monoclonal antibody CAL | PIK3C2A   | 0.000966 | -2.020127   |  |
| 17452 | monoclonal antibody CAL | GTF2I     | 0.000121 | 2.003362    |  |
| 17453 | monoclonal antibody CAL | SH3D19    | 0.000015 | 2.019181    |  |
| 17454 | monoclonal antibody CAL | ERBB2     | 0.000861 | 2.020716    |  |
| 17455 | monoclonal antibody CAL | HSF1      | 0.000038 | 2.023021    |  |
| 17456 | monoclonal antibody CAL | MET       | 0.000133 | 2.025802    |  |
| 17457 | monoclonal antibody CAL | BCL2L1    | 0.000301 | 2.026625    |  |
| 17458 | monoclonal antibody CAL | SUPT16H   | 0.000865 | 2.05419     |  |
| 17459 | monoclonal antibody CAL | NFS1      | 0.000133 | 2.054213    |  |
| 17460 | monoclonal antibody CAL | LASS6     | 0.000247 | 2.093112    |  |
| 17461 | monoclonal antibody CAL | PRPF6     | 0.000002 | 2.160814    |  |
| 17462 | monoclonal antibody CAL | ST6GAL1   | 0.001722 | 2.345209    |  |
| 17463 | monoclonal antibody CAL | REPIN1    | 0.000101 | 2.415475    |  |
| 17464 | monoclonal antibody CAL | COPA      | 0.000015 | 2.579514    |  |
| 17465 | Multiple tumors         | COPG      | 0        | -1.774521   |  |
| 17466 | Multiple tumors         | LOC158257 | 0        | 1.8571      |  |
| 17467 | Mutant                  | ARHGAP29  | 0.000004 | -574.399087 |  |
| 17468 | Mutant                  | DKK1      | 0        | -561.358383 |  |
| 17469 | Mutant                  | GTSF1     | 0.000008 | -399.301718 |  |
| 17470 | Mutant                  | PCDH7     | 0.000001 | -387.281575 |  |
| 17471 | Mutant                  | ALDH1A3   | 0.000006 | -365.306613 |  |
| 17472 | Mutant                  | TUBA1A    | 0        | -362.306283 |  |
| 17473 | Mutant                  | MAGEB2    | 0        | -317.484128 |  |
| 17474 | Mutant                  | MAGEA3    | 0        | -286.243733 |  |
| 17475 | Mutant                  | GNAI1     | 0        | -249.518455 |  |
| 17476 | Mutant                  | CALD1     | 0.000002 | -236.177902 |  |
| 17477 | Mutant                  | MAGEA2    | 0.000003 | -195.042669 |  |
| 17478 | Mutant                  | RDX       | 0.000002 | -174.326299 |  |
| 17479 | Mutant                  | HLTF      | 0.000003 | -143.882085 |  |
| 17480 | Mutant                  | WBP5      | 0.000004 | -121.981655 |  |
| 17481 | Mutant                  | GPR110    | 0.00001  | -119.33262  |  |
| 17482 | Mutant                  | SCG2      | 0.000007 | -97.219518  |  |
| 17483 | Mutant                  | HBE1      | 0.000005 | -95.940684  |  |
| 17484 | Mutant                  | LOC399959 | 0.000008 | -91.493939  |  |
| 17485 | Mutant                  | ENAH      | 0.000001 | -87.225685  |  |
| 17486 | Mutant                  | CD55      | 0.000008 | -85.609602  |  |
| 17487 | Mutant                  | PDE4B     | 0.000008 | -81.362804  |  |
| 17488 | Mutant                  | TMEM200A  | 0.000008 | -79.055071  |  |
| 17489 | Mutant                  | NPW       | 0.000004 | -75.322469  |  |
| 17490 | Mutant                  | WNT16     | 0.000003 | -72.070133  |  |
| 17491 | Mutant                  | PVRL3     | 0.000006 | -68.00041   |  |
| 17492 | Mutant                  | PDP1      | 0        | -64.485389  |  |
| 17493 | Mutant                  | PLA2G4A   | 0.000004 | -63.232318  |  |
| 17494 | Mutant                  | GLUL      | 0.000003 | -60.819892  |  |
| 17495 | Mutant                  | SELM      | 0.000003 | -60.753264  |  |
| 17496 | Mutant                  | FMNL2     | 0        | -54.602674  |  |
| 17497 | Mutant                  | ANTXR1    | 0.000001 | -49.218279  |  |
| 17498 | Mutant                  | DSE       | 0.000008 | -44.952396  |  |

|       |        |            |          |            |  |
|-------|--------|------------|----------|------------|--|
| 17499 | Mutant | PHLDB2     | 0.000003 | -44.745438 |  |
| 17500 | Mutant | TBC1D9     | 0.000002 | -41.505718 |  |
| 17501 | Mutant | ANXA10     | 0.000003 | -40.771601 |  |
| 17502 | Mutant | FAM171B    | 0.000005 | -38.639504 |  |
| 17503 | Mutant | FAM92A1    | 0.000002 | -34.853387 |  |
| 17504 | Mutant | MEF2C      | 0        | -33.319674 |  |
| 17505 | Mutant | COL12A1    | 0.000005 | -31.924422 |  |
| 17506 | Mutant | NR3C1      | 0.000003 | -31.321162 |  |
| 17507 | Mutant | UBE2E2     | 0.000004 | -29.738673 |  |
| 17508 | Mutant | RAB12      | 0.000004 | -27.617611 |  |
| 17509 | Mutant | SMARCA1    | 0.000004 | -27.270593 |  |
| 17510 | Mutant | INPP5D     | 0.007407 | -27.074795 |  |
| 17511 | Mutant | EPB41L2    | 0.000011 | -26.226904 |  |
| 17512 | Mutant | RRAGD      | 0.000011 | -25.191409 |  |
| 17513 | Mutant | GPAT2      | 0.000007 | -25.125105 |  |
| 17514 | Mutant | MAGEA12    | 0.000007 | -24.113279 |  |
| 17515 | Mutant | ZNF385B    | 0.000001 | -23.716727 |  |
| 17516 | Mutant | RUNDC3B    | 0.000012 | -22.999973 |  |
| 17517 | Mutant | FERMT2     | 0.000004 | -22.008593 |  |
| 17518 | Mutant | NOV        | 0.000004 | -21.833935 |  |
| 17519 | Mutant | SFTPB      | 0.002748 | -19.68976  |  |
| 17520 | Mutant | IFITM3     | 0.000002 | -19.187446 |  |
| 17521 | Mutant | PPP1R9A    | 0.000008 | -19.038244 |  |
| 17522 | Mutant | SSFA2      | 0.000004 | -18.763377 |  |
| 17523 | Mutant | SPIRE1     | 0.000001 | -18.354058 |  |
| 17524 | Mutant | SMAD4      | 0.000004 | -18.303144 |  |
| 17525 | Mutant | RBM24      | 0.000003 | -17.565277 |  |
| 17526 | Mutant | NCRNA00173 | 0.000006 | -16.974223 |  |
| 17527 | Mutant | CSAG2      | 0.000003 | -16.47408  |  |
| 17528 | Mutant | KLHL13     | 0.000003 | -15.91222  |  |
| 17529 | Mutant | B3GALNT1   | 0.000003 | -15.014644 |  |
| 17530 | Mutant | GABBR1     | 0.040359 | -14.781427 |  |
| 17531 | Mutant | OGFRL1     | 0.00001  | -14.609415 |  |
| 17532 | Mutant | SERPINB9   | 0.000001 | -14.452624 |  |
| 17533 | Mutant | MT1X       | 0.000004 | -13.99134  |  |
| 17534 | Mutant | CFL2       | 0.000008 | -13.734276 |  |
| 17535 | Mutant | MT2A       | 0.000012 | -13.177214 |  |
| 17536 | Mutant | SYTL3      | 0.000004 | -12.586998 |  |
| 17537 | Mutant | SIX4       | 0.000011 | -12.215531 |  |
| 17538 | Mutant | C8orf47    | 0.000005 | -12.045282 |  |
| 17539 | Mutant | LAPTM4B    | 0        | -12.015325 |  |
| 17540 | Mutant | MFAP2      | 0.000003 | -11.296665 |  |
| 17541 | Mutant | NFIC       | 0.000009 | -10.751284 |  |
| 17542 | Mutant | BDNF       | 0.000006 | -10.742728 |  |
| 17543 | Mutant | C9orf72    | 0.000004 | -10.188588 |  |
| 17544 | Mutant | F2RL1      | 0.000003 | -9.207135  |  |
| 17545 | Mutant | CFD        | 0.000004 | -9.061576  |  |
| 17546 | Mutant | NME4       | 0.000007 | -9.047245  |  |
| 17547 | Mutant | TIMP2      | 0.000006 | -8.705022  |  |
| 17548 | Mutant | PALLD      | 0.000005 | -8.486156  |  |

|       |        |           |          |           |  |
|-------|--------|-----------|----------|-----------|--|
| 17549 | Mutant | UGT8      | 0        | -7.983426 |  |
| 17550 | Mutant | PITPNC1   | 0.00001  | -7.945857 |  |
| 17551 | Mutant | LOC643792 | 0.000011 | -7.85897  |  |
| 17552 | Mutant | MYL9      | 0.000004 | -7.687039 |  |
| 17553 | Mutant | RHOQ      | 0.000001 | -7.383621 |  |
| 17554 | Mutant | EMP3      | 0.000002 | -7.129033 |  |
| 17555 | Mutant | RHBDL2    | 0.040359 | -7.122631 |  |
| 17556 | Mutant | CLDND1    | 0.000003 | -7.055015 |  |
| 17557 | Mutant | NAV3      | 0.000008 | -7.051791 |  |
| 17558 | Mutant | DPYD      | 0.000008 | -6.845269 |  |
| 17559 | Mutant | NEO1      | 0.000007 | -6.778429 |  |
| 17560 | Mutant | AP1S3     | 0.000004 | -6.665484 |  |
| 17561 | Mutant | KLC3      | 0.000003 | -6.402367 |  |
| 17562 | Mutant | MAP1B     | 0.000008 | -6.150958 |  |
| 17563 | Mutant | COL6A2    | 0.000005 | -6.07294  |  |
| 17564 | Mutant | NCS1      | 0.000008 | -5.978362 |  |
| 17565 | Mutant | MLF1      | 0.00001  | -5.942251 |  |
| 17566 | Mutant | FAM164A   | 0.000005 | -5.904321 |  |
| 17567 | Mutant | TMEM47    | 0        | -5.826227 |  |
| 17568 | Mutant | PCP4      | 0        | -5.673615 |  |
| 17569 | Mutant | ASPHD1    | 0.00001  | -5.58353  |  |
| 17570 | Mutant | PCDHA1    | 0.00001  | -5.429812 |  |
| 17571 | Mutant | RNF141    | 0.000002 | -5.403097 |  |
| 17572 | Mutant | BEND6     | 0.000005 | -5.306019 |  |
| 17573 | Mutant | SMURF2    | 0.000008 | -5.287704 |  |
| 17574 | Mutant | CCNG2     | 0.00001  | -5.12713  |  |
| 17575 | Mutant | SOHLH2    | 0        | -5.113841 |  |
| 17576 | Mutant | FZD3      | 0.000009 | -5.022363 |  |
| 17577 | Mutant | ABCB1     | 0.000001 | -4.984489 |  |
| 17578 | Mutant | CRTAM     | 0.000002 | -4.836897 |  |
| 17579 | Mutant | RHOF      | 0.000006 | -4.754852 |  |
| 17580 | Mutant | ARAP2     | 0        | -4.612948 |  |
| 17581 | Mutant | EZR       | 0.000008 | -4.57178  |  |
| 17582 | Mutant | FYCO1     | 0.000012 | -4.546863 |  |
| 17583 | Mutant | CADM1     | 0.000001 | -4.379939 |  |
| 17584 | Mutant | ATP6AP1L  | 0.00001  | -4.29516  |  |
| 17585 | Mutant | RSAD2     | 0.042664 | -4.140086 |  |
| 17586 | Mutant | GPC1      | 0.000011 | -4.112104 |  |
| 17587 | Mutant | MID1      | 0        | -4.045758 |  |
| 17588 | Mutant | TWSG1     | 0.000008 | -3.912104 |  |
| 17589 | Mutant | DMKN      | 0.000003 | -3.83423  |  |
| 17590 | Mutant | LATS2     | 0.000002 | -3.740308 |  |
| 17591 | Mutant | PPP3CA    | 0.000011 | -3.71873  |  |
| 17592 | Mutant | MXRA7     | 0.000007 | -3.70477  |  |
| 17593 | Mutant | CUEDC2    | 0.000005 | -3.636746 |  |
| 17594 | Mutant | ACVR2B    | 0.000005 | -3.390992 |  |
| 17595 | Mutant | GDA       | 0.000005 | -3.335761 |  |
| 17596 | Mutant | LTBP3     | 0.000008 | -3.322505 |  |
| 17597 | Mutant | AP3S1     | 0.000001 | -3.304655 |  |
| 17598 | Mutant | SFTPC     | 0.003295 | -3.29668  |  |

|       |        |          |          |           |  |
|-------|--------|----------|----------|-----------|--|
| 17599 | Mutant | TAB2     | 0.000007 | -3.280706 |  |
| 17600 | Mutant | GDI1     | 0.000006 | -3.232506 |  |
| 17601 | Mutant | CYB5B    | 0.000002 | -3.022785 |  |
| 17602 | Mutant | RAB18    | 0.000004 | -2.978612 |  |
| 17603 | Mutant | SLC38A2  | 0.000011 | -2.939973 |  |
| 17604 | Mutant | FAM160B1 | 0.000002 | -2.933826 |  |
| 17605 | Mutant | ALCAM    | 0        | -2.928731 |  |
| 17606 | Mutant | ACTR3B   | 0.000004 | -2.920274 |  |
| 17607 | Mutant | COL18A1  | 0.000011 | -2.87342  |  |
| 17608 | Mutant | SMN1     | 0.000003 | -2.86054  |  |
| 17609 | Mutant | MAP4     | 0.000005 | -2.832426 |  |
| 17610 | Mutant | NIPSNAP1 | 0.000006 | -2.789355 |  |
| 17611 | Mutant | SCG5     | 0        | -2.784814 |  |
| 17612 | Mutant | CIRBP    | 0.000011 | -2.747841 |  |
| 17613 | Mutant | DHX30    | 0.000003 | -2.694996 |  |
| 17614 | Mutant | SOCS5    | 0.000008 | -2.690637 |  |
| 17615 | Mutant | ETS1     | 0        | -2.665223 |  |
| 17616 | Mutant | SRPX     | 0.000001 | -2.641714 |  |
| 17617 | Mutant | TMEM33   | 0        | -2.634908 |  |
| 17618 | Mutant | ZDHHC17  | 0.000006 | -2.562145 |  |
| 17619 | Mutant | CTGF     | 0        | -2.556206 |  |
| 17620 | Mutant | IL1RAP   | 0        | -2.550988 |  |
| 17621 | Mutant | RNGTT    | 0.000007 | -2.474348 |  |
| 17622 | Mutant | HECTD2   | 0        | -2.422578 |  |
| 17623 | Mutant | PRKAR1A  | 0.000008 | -2.414002 |  |
| 17624 | Mutant | NEIL3    | 0        | -2.366079 |  |
| 17625 | Mutant | MAGEA1   | 0        | -2.340793 |  |
| 17626 | Mutant | FXR1     | 0.000005 | -2.303015 |  |
| 17627 | Mutant | GLG1     | 0.000011 | -2.3013   |  |
| 17628 | Mutant | FAT1     | 0        | -2.282566 |  |
| 17629 | Mutant | ACSM3    | 0        | -2.272923 |  |
| 17630 | Mutant | APBB2    | 0        | -2.26671  |  |
| 17631 | Mutant | FOXQ1    | 0.000001 | -2.258836 |  |
| 17632 | Mutant | EFR3A    | 0.000005 | -2.248263 |  |
| 17633 | Mutant | BTBD3    | 0        | -2.240024 |  |
| 17634 | Mutant | IRX3     | 0.000001 | -2.218727 |  |
| 17635 | Mutant | SERPINA1 | 0.000023 | -2.200309 |  |
| 17636 | Mutant | C21orf56 | 0.000002 | -2.194339 |  |
| 17637 | Mutant | SNX25    | 0        | -2.194028 |  |
| 17638 | Mutant | MAP3K7   | 0.000008 | -2.186104 |  |
| 17639 | Mutant | RHOBTB3  | 0        | -2.164787 |  |
| 17640 | Mutant | USP33    | 0.000005 | -2.154806 |  |
| 17641 | Mutant | CYB5R2   | 0        | -2.126386 |  |
| 17642 | Mutant | KIAA1712 | 0.000001 | -2.121687 |  |
| 17643 | Mutant | FRYL     | 0        | -2.120305 |  |
| 17644 | Mutant | PGM2     | 0        | -2.120036 |  |
| 17645 | Mutant | CHURC1   | 0        | -2.07728  |  |
| 17646 | Mutant | ARHGAP18 | 0        | -2.071233 |  |
| 17647 | Mutant | TMEM30B  | 0        | -2.061164 |  |
| 17648 | Mutant | PDLIM5   | 0.000004 | -2.061163 |  |

|       |        |          |          |           |  |
|-------|--------|----------|----------|-----------|--|
| 17649 | Mutant | ARMCX4   | 0        | -2.03856  |  |
| 17650 | Mutant | KLK6     | 0        | -2.025113 |  |
| 17651 | Mutant | SMU1     | 0.00001  | -2.014751 |  |
| 17652 | Mutant | TIAL1    | 0.000008 | -2.008613 |  |
| 17653 | Mutant | GNPDA2   | 0        | -2.007448 |  |
| 17654 | Mutant | MGC57346 | 0.000011 | -2.0041   |  |
| 17655 | Mutant | PKNOX1   | 0        | 2.039579  |  |
| 17656 | Mutant | LAMA1    | 0        | 2.085149  |  |
| 17657 | Mutant | DCAF16   | 0        | 2.090845  |  |
| 17658 | Mutant | CDC42SE2 | 0.000005 | 2.101573  |  |
| 17659 | Mutant | PAH      | 0.000001 | 2.101812  |  |
| 17660 | Mutant | CCDC109A | 0.000004 | 2.105463  |  |
| 17661 | Mutant | KLF11    | 0        | 2.14228   |  |
| 17662 | Mutant | DHX15    | 0        | 2.14451   |  |
| 17663 | Mutant | TOLLIP   | 0.000011 | 2.144689  |  |
| 17664 | Mutant | LMAN2    | 0.000009 | 2.153212  |  |
| 17665 | Mutant | MACF1    | 0.000004 | 2.176726  |  |
| 17666 | Mutant | UST      | 0        | 2.208555  |  |
| 17667 | Mutant | HNRNPH1  | 0.000008 | 2.244705  |  |
| 17668 | Mutant | PDIA6    | 0.000001 | 2.277313  |  |
| 17669 | Mutant | FAM73B   | 0.000007 | 2.288975  |  |
| 17670 | Mutant | ST7      | 0.000002 | 2.304399  |  |
| 17671 | Mutant | RFC1     | 0        | 2.325179  |  |
| 17672 | Mutant | TMSB4X   | 0.000008 | 2.335537  |  |
| 17673 | Mutant | PDIA4    | 0.00001  | 2.411109  |  |
| 17674 | Mutant | GPR160   | 0.000006 | 2.457485  |  |
| 17675 | Mutant | GPR89A   | 0.000011 | 2.508425  |  |
| 17676 | Mutant | VDAC1    | 0        | 2.524484  |  |
| 17677 | Mutant | SBF1     | 0.00001  | 2.529004  |  |
| 17678 | Mutant | MRPS31   | 0.000004 | 2.566806  |  |
| 17679 | Mutant | NCBP1    | 0.000007 | 2.570732  |  |
| 17680 | Mutant | MTMR6    | 0.000005 | 2.609182  |  |
| 17681 | Mutant | CASK     | 0.000008 | 2.618893  |  |
| 17682 | Mutant | EPHB3    | 0.000008 | 2.630731  |  |
| 17683 | Mutant | SURF4    | 0.000006 | 2.6467    |  |
| 17684 | Mutant | KIAA0895 | 0        | 2.655167  |  |
| 17685 | Mutant | MKKS     | 0.000002 | 2.66267   |  |
| 17686 | Mutant | KRTAP4-1 | 0.000001 | 2.677109  |  |
| 17687 | Mutant | CD163L1  | 0        | 2.686773  |  |
| 17688 | Mutant | ROD1     | 0.000008 | 2.699594  |  |
| 17689 | Mutant | TBC1D19  | 0        | 2.703141  |  |
| 17690 | Mutant | TDRKH    | 0.000007 | 2.717036  |  |
| 17691 | Mutant | ANAPC4   | 0        | 2.719132  |  |
| 17692 | Mutant | ZCCHC4   | 0        | 2.743536  |  |
| 17693 | Mutant | PI4K2B   | 0        | 2.780289  |  |
| 17694 | Mutant | CHCHD7   | 0.000001 | 2.802096  |  |
| 17695 | Mutant | PDS5A    | 0        | 2.81167   |  |
| 17696 | Mutant | GPR125   | 0        | 2.853912  |  |
| 17697 | Mutant | HBS1L    | 0.000005 | 2.859622  |  |
| 17698 | Mutant | UGDH     | 0        | 2.871911  |  |

|       |        |              |          |          |  |
|-------|--------|--------------|----------|----------|--|
| 17699 | Mutant | TAF13        | 0        | 2.8756   |  |
| 17700 | Mutant | HSDL2        | 0.000005 | 2.883179 |  |
| 17701 | Mutant | STAMBPL1     | 0.000004 | 2.891243 |  |
| 17702 | Mutant | PDGFC        | 0        | 2.969628 |  |
| 17703 | Mutant | ZNF702P      | 0        | 2.999537 |  |
| 17704 | Mutant | ECH1         | 0.000006 | 3.002113 |  |
| 17705 | Mutant | TSEN15       | 0.000008 | 3.014576 |  |
| 17706 | Mutant | C4orf34      | 0        | 3.021017 |  |
| 17707 | Mutant | MIPEP        | 0.000003 | 3.028462 |  |
| 17708 | Mutant | RBPJ         | 0        | 3.033798 |  |
| 17709 | Mutant | LIAS         | 0        | 3.034223 |  |
| 17710 | Mutant | LNK2         | 0.000003 | 3.098544 |  |
| 17711 | Mutant | SEL1L3       | 0        | 3.136382 |  |
| 17712 | Mutant | LCORL        | 0        | 3.189998 |  |
| 17713 | Mutant | UBE2K        | 0        | 3.208984 |  |
| 17714 | Mutant | RNF6         | 0.000011 | 3.218499 |  |
| 17715 | Mutant | SEPSECS      | 0        | 3.25347  |  |
| 17716 | Mutant | CARKD        | 0.000005 | 3.322652 |  |
| 17717 | Mutant | TNS4         | 0.000007 | 3.341882 |  |
| 17718 | Mutant | GFPT1        | 0.000008 | 3.359642 |  |
| 17719 | Mutant | TPP2         | 0        | 3.361754 |  |
| 17720 | Mutant | MCF2L        | 0.000008 | 3.374845 |  |
| 17721 | Mutant | S100A5       | 0.000012 | 3.429268 |  |
| 17722 | Mutant | HOXC5        | 0.000005 | 3.435105 |  |
| 17723 | Mutant | STIM2        | 0        | 3.440687 |  |
| 17724 | Mutant | RALGAPA2     | 0.000003 | 3.471811 |  |
| 17725 | Mutant | UBAC2        | 0.000002 | 3.488265 |  |
| 17726 | Mutant | C4orf52      | 0        | 3.544815 |  |
| 17727 | Mutant | IFT88        | 0.000004 | 3.610645 |  |
| 17728 | Mutant | TXNDC9       | 0.000004 | 3.677724 |  |
| 17729 | Mutant | RASSF5       | 0.000001 | 3.967723 |  |
| 17730 | Mutant | TJP2         | 0.000003 | 3.974191 |  |
| 17731 | Mutant | C20orf24     | 0        | 4.02621  |  |
| 17732 | Mutant | CD68         | 0.000005 | 4.278797 |  |
| 17733 | Mutant | CTSH         | 0.000011 | 4.285228 |  |
| 17734 | Mutant | SEC16B       | 0.000003 | 4.300372 |  |
| 17735 | Mutant | TBPL1        | 0.000001 | 4.377912 |  |
| 17736 | Mutant | ARGLU1       | 0.000003 | 4.387082 |  |
| 17737 | Mutant | SLC12A7      | 0.000006 | 4.427164 |  |
| 17738 | Mutant | N4BP2        | 0        | 4.532577 |  |
| 17739 | Mutant | SERPINB1     | 0.000006 | 4.559866 |  |
| 17740 | Mutant | H19          | 0        | 4.564358 |  |
| 17741 | Mutant | ANKRD22      | 0.000008 | 4.590764 |  |
| 17742 | Mutant | GALK2        | 0.000011 | 4.648461 |  |
| 17743 | Mutant | LOC100507328 | 0.000006 | 4.76041  |  |
| 17744 | Mutant | IFNGR1       | 0.000004 | 4.775064 |  |
| 17745 | Mutant | SMARCA2      | 0.000012 | 4.928856 |  |
| 17746 | Mutant | MRPS10       | 0.000001 | 4.993962 |  |
| 17747 | Mutant | MAP7         | 0.000007 | 4.998464 |  |
| 17748 | Mutant | SIGLEC15     | 0.000008 | 5.328116 |  |

|       |        |            |          |           |  |
|-------|--------|------------|----------|-----------|--|
| 17749 | Mutant | ARHGAP26   | 0.000003 | 5.448188  |  |
| 17750 | Mutant | NF1        | 0.000011 | 5.571354  |  |
| 17751 | Mutant | EPHA4      | 0.000006 | 5.611204  |  |
| 17752 | Mutant | MSH3       | 0.00001  | 5.813158  |  |
| 17753 | Mutant | APOL6      | 0.000009 | 5.838919  |  |
| 17754 | Mutant | LPCAT1     | 0.000007 | 5.975302  |  |
| 17755 | Mutant | TCF7       | 0.000005 | 6.035586  |  |
| 17756 | Mutant | EDAR       | 0.000008 | 6.047987  |  |
| 17757 | Mutant | MED20      | 0.000003 | 6.097804  |  |
| 17758 | Mutant | SPATA13    | 0.000011 | 6.214893  |  |
| 17759 | Mutant | LOC400128  | 0.000008 | 6.414813  |  |
| 17760 | Mutant | TST        | 0.000009 | 6.449722  |  |
| 17761 | Mutant | HSPA12A    | 0.000001 | 6.570195  |  |
| 17762 | Mutant | TAF8       | 0.000008 | 6.633628  |  |
| 17763 | Mutant | MAST4      | 0.000008 | 6.637752  |  |
| 17764 | Mutant | FUT6       | 0.000011 | 6.724803  |  |
| 17765 | Mutant | GMDS       | 0        | 7.063824  |  |
| 17766 | Mutant | PLIN2      | 0.000003 | 7.13014   |  |
| 17767 | Mutant | ZNF260     | 0.000009 | 7.257563  |  |
| 17768 | Mutant | ADAMTS17   | 0.000008 | 7.30365   |  |
| 17769 | Mutant | EPB41L4B   | 0.000001 | 7.309877  |  |
| 17770 | Mutant | TMEM62     | 0.000002 | 7.375007  |  |
| 17771 | Mutant | PDK3       | 0.000003 | 7.534799  |  |
| 17772 | Mutant | MAD1L1     | 0.000002 | 7.721161  |  |
| 17773 | Mutant | PERP       | 0.000011 | 7.760576  |  |
| 17774 | Mutant | MECOM      | 0.00001  | 7.812382  |  |
| 17775 | Mutant | AMACR      | 0.000008 | 7.819271  |  |
| 17776 | Mutant | GPR39      | 0.000007 | 7.846796  |  |
| 17777 | Mutant | DNAJC3     | 0.000003 | 7.962623  |  |
| 17778 | Mutant | SH3PXD2A   | 0.000006 | 8.056364  |  |
| 17779 | Mutant | C10orf58   | 0.000003 | 8.113021  |  |
| 17780 | Mutant | TNFRSF19   | 0.000006 | 8.17702   |  |
| 17781 | Mutant | ANP32E     | 0.000003 | 8.890413  |  |
| 17782 | Mutant | C6orf64    | 0.000008 | 9.350503  |  |
| 17783 | Mutant | DPEP1      | 0.000011 | 9.477999  |  |
| 17784 | Mutant | CYorf15B   | 0.000005 | 9.546186  |  |
| 17785 | Mutant | EDEM1      | 0.000009 | 9.667083  |  |
| 17786 | Mutant | NCRNA00094 | 0.000004 | 9.731985  |  |
| 17787 | Mutant | ANKS4B     | 0.000008 | 9.996164  |  |
| 17788 | Mutant | ECM1       | 0.000002 | 10.281889 |  |
| 17789 | Mutant | PKP1       | 0.000012 | 10.698267 |  |
| 17790 | Mutant | EPHB2      | 0.000004 | 12.340973 |  |
| 17791 | Mutant | LOC339290  | 0.000008 | 12.446039 |  |
| 17792 | Mutant | IGF1R      | 0.000011 | 12.967261 |  |
| 17793 | Mutant | SDC1       | 0.000003 | 13.139692 |  |
| 17794 | Mutant | A1CF       | 0.000008 | 13.437266 |  |
| 17795 | Mutant | IRF8       | 0.000003 | 13.757054 |  |
| 17796 | Mutant | ABHD2      | 0.00001  | 14.102907 |  |
| 17797 | Mutant | CACNA2D4   | 0.000007 | 14.539368 |  |
| 17798 | Mutant | TNFRSF1B   | 0.000007 | 14.592414 |  |

|       |        |           |          |           |  |
|-------|--------|-----------|----------|-----------|--|
| 17799 | Mutant | ACOT1     | 0.000011 | 15.376655 |  |
| 17800 | Mutant | CHST11    | 0.000007 | 15.569454 |  |
| 17801 | Mutant | BCL2L15   | 0.000006 | 16.516903 |  |
| 17802 | Mutant | FCGRT     | 0.000007 | 17.453322 |  |
| 17803 | Mutant | TNFSF10   | 0.000002 | 18.515111 |  |
| 17804 | Mutant | TMPRSS2   | 0.000008 | 18.650402 |  |
| 17805 | Mutant | CXCR3     | 0.000008 | 18.966222 |  |
| 17806 | Mutant | C5orf17   | 0.000004 | 19.220543 |  |
| 17807 | Mutant | SORBS2    | 0.000003 | 20.472901 |  |
| 17808 | Mutant | LGR5      | 0.000003 | 21.490774 |  |
| 17809 | Mutant | PTGR1     | 0.000007 | 22.056714 |  |
| 17810 | Mutant | EPSTI1    | 0.000006 | 22.529177 |  |
| 17811 | Mutant | CTSS      | 0.000006 | 23.057346 |  |
| 17812 | Mutant | ZNF703    | 0.000007 | 23.366143 |  |
| 17813 | Mutant | CYorf15A  | 0.000003 | 23.376836 |  |
| 17814 | Mutant | LOC401522 | 0.000002 | 23.921747 |  |
| 17815 | Mutant | CD24      | 0.000001 | 25.242614 |  |
| 17816 | Mutant | CCR1      | 0.000006 | 25.656619 |  |
| 17817 | Mutant | SCML4     | 0.000008 | 25.82047  |  |
| 17818 | Mutant | GCNT3     | 0.000006 | 27.110823 |  |
| 17819 | Mutant | SPAG16    | 0.000005 | 27.406277 |  |
| 17820 | Mutant | CCR6      | 0.000005 | 29.162851 |  |
| 17821 | Mutant | C15orf48  | 0.000006 | 30.344559 |  |
| 17822 | Mutant | PROX1     | 0.000002 | 31.142485 |  |
| 17823 | Mutant | ASCL2     | 0.000002 | 32.801288 |  |
| 17824 | Mutant | GAS2      | 0.000004 | 32.924259 |  |
| 17825 | Mutant | SLC7A7    | 0.000004 | 33.871488 |  |
| 17826 | Mutant | DDC       | 0.000002 | 34.955331 |  |
| 17827 | Mutant | HCN1      | 0.000011 | 36.841006 |  |
| 17828 | Mutant | SPRR3     | 0.000007 | 37.149195 |  |
| 17829 | Mutant | RASEF     | 0.000003 | 38.209334 |  |
| 17830 | Mutant | GIPC2     | 0.000001 | 38.52687  |  |
| 17831 | Mutant | CALB1     | 0.000011 | 38.922345 |  |
| 17832 | Mutant | GIMAP2    | 0.000002 | 38.94836  |  |
| 17833 | Mutant | GSTT1     | 0.000011 | 39.362819 |  |
| 17834 | Mutant | GNG2      | 0.000006 | 39.84096  |  |
| 17835 | Mutant | ZNF750    | 0.000002 | 39.920646 |  |
| 17836 | Mutant | LOC283352 | 0        | 40.894875 |  |
| 17837 | Mutant | SLC35D3   | 0.000001 | 42.916508 |  |
| 17838 | Mutant | PIP5K1B   | 0.000004 | 43.841456 |  |
| 17839 | Mutant | RARRES1   | 0        | 44.474544 |  |
| 17840 | Mutant | HGD       | 0.000005 | 48.06248  |  |
| 17841 | Mutant | SORBS1    | 0.000004 | 48.717851 |  |
| 17842 | Mutant | SCCPDH    | 0.000003 | 49.108069 |  |
| 17843 | Mutant | PSMB8     | 0        | 52.118448 |  |
| 17844 | Mutant | LOC643201 | 0.000001 | 53.597538 |  |
| 17845 | Mutant | UGT1A8    | 0        | 55.425596 |  |
| 17846 | Mutant | TFF3      | 0.000003 | 60.13651  |  |
| 17847 | Mutant | POF1B     | 0        | 61.925637 |  |
| 17848 | Mutant | OXGR1     | 0.000002 | 63.151094 |  |



|       |                     |              |          |             |  |
|-------|---------------------|--------------|----------|-------------|--|
| 17849 | Mutant              | EIF1AY       | 0.000001 | 63.631934   |  |
| 17850 | Mutant              | HKDC1        | 0.000001 | 65.399986   |  |
| 17851 | Mutant              | PDZK1        | 0.000001 | 67.054252   |  |
| 17852 | Mutant              | PLAC8        | 0.000004 | 67.825095   |  |
| 17853 | Mutant              | KCNE3        | 0.000003 | 70.051982   |  |
| 17854 | Mutant              | AZGP1        | 0.000005 | 75.120812   |  |
| 17855 | Mutant              | KRT6B        | 0.000002 | 80.131876   |  |
| 17856 | Mutant              | C9orf64      | 0.000008 | 95.383544   |  |
| 17857 | Mutant              | ABHD12B      | 0.000003 | 96.415173   |  |
| 17858 | Mutant              | AKR1C1       | 0.000001 | 101.557094  |  |
| 17859 | Mutant              | CARD16       | 0.000005 | 105.058602  |  |
| 17860 | Mutant              | VIL1         | 0.000001 | 107.071449  |  |
| 17861 | Mutant              | LOC100507192 | 0.000006 | 109.086216  |  |
| 17862 | Mutant              | CASP1        | 0.000002 | 120.264435  |  |
| 17863 | Mutant              | UGT1A6       | 0.000002 | 123.718578  |  |
| 17864 | Mutant              | C9orf152     | 0.000001 | 124.698025  |  |
| 17865 | Mutant              | ASB4         | 0        | 142.105173  |  |
| 17866 | Mutant              | CCL14-CCL15  | 0.000002 | 143.80414   |  |
| 17867 | Mutant              | AKR1C2       | 0        | 144.760834  |  |
| 17868 | Mutant              | MANSC1       | 0.000007 | 164.830215  |  |
| 17869 | Mutant              | CLRN3        | 0.00001  | 187.914971  |  |
| 17870 | Mutant              | TOX3         | 0        | 188.756066  |  |
| 17871 | Mutant              | FAM3B        | 0.000009 | 205.648843  |  |
| 17872 | Mutant              | LGALS4       | 0.000001 | 249.000167  |  |
| 17873 | Mutant              | UGT1A1       | 0        | 289.754891  |  |
| 17874 | Mutant              | LCK          | 0.000003 | 297.044368  |  |
| 17875 | Mutant              | AGR2         | 0.000006 | 440.058646  |  |
| 17876 | Mutant              | PLA2G2A      | 0.000006 | 510.8109    |  |
| 17877 | Mutant              | TSPAN8       | 0        | 548.008396  |  |
| 17878 | Mutant              | LYZ          | 0        | 553.965593  |  |
| 17879 | Mutant              | GPX2         | 0.000008 | 649.937377  |  |
| 17880 | Myocardial Ischemia | AGGF1        | 0.000005 | 2.12439     |  |
| 17881 | Nausea              | MAGEA3       | 0.001898 | -7.658879   |  |
| 17882 | Nausea              | MAGEA6       | 0.0066   | -5.763705   |  |
| 17883 | Nausea              | PGBD5        | 0.001898 | -2.185691   |  |
| 17884 | Nausea              | UCA1         | 0.034469 | -2.108421   |  |
| 17885 | Neck Carcinoma      | TOR1AIP2     | 0.003674 | 2.578503    |  |
| 17886 | Neoplasm            | LOC646014    | 0.000324 | -520.819672 |  |
| 17887 | Neoplasm            | SLC2A3       | 0.012839 | -38.132322  |  |
| 17888 | Neoplasm            | CHST11       | 0.005083 | -30.759622  |  |
| 17889 | Neoplasm            | OTOP2        | 0        | -27.178143  |  |
| 17890 | Neoplasm            | GCG          | 0        | -26.920825  |  |
| 17891 | Neoplasm            | POPDC3       | 0.003914 | -22.914702  |  |
| 17892 | Neoplasm            | TMIGD1       | 0        | -19.655689  |  |
| 17893 | Neoplasm            | CHGB         | 0        | -14.584818  |  |
| 17894 | Neoplasm            | TGFA         | 0.001734 | -14.284298  |  |
| 17895 | Neoplasm            | MKX          | 0.011387 | -13.13189   |  |
| 17896 | Neoplasm            | EMID1        | 0.036913 | -12.047588  |  |
| 17897 | Neoplasm            | DAB2         | 0.004511 | -11.772476  |  |
| 17898 | Neoplasm            | PRF1         | 0.012737 | -11.739147  |  |

|       |          |           |          |            |  |
|-------|----------|-----------|----------|------------|--|
| 17899 | Neoplasm | DPYSL3    | 0.002716 | -10.911233 |  |
| 17900 | Neoplasm | PLN       | 0.000977 | -10.884812 |  |
| 17901 | Neoplasm | USP24     | 0.006177 | -10.253317 |  |
| 17902 | Neoplasm | PCP4      | 0.012116 | -9.696901  |  |
| 17903 | Neoplasm | VWCE      | 0.037347 | -9.218495  |  |
| 17904 | Neoplasm | CLU       | 0.000387 | -8.79937   |  |
| 17905 | Neoplasm | TRPM6     | 0        | -8.618878  |  |
| 17906 | Neoplasm | NAV2      | 0.014313 | -8.538061  |  |
| 17907 | Neoplasm | CRYBA2    | 0        | -8.522861  |  |
| 17908 | Neoplasm | TTR       | 0        | -8.441377  |  |
| 17909 | Neoplasm | CXCL12    | 0        | -8.439793  |  |
| 17910 | Neoplasm | ITPR2     | 0.000357 | -8.273259  |  |
| 17911 | Neoplasm | CPE       | 0.010432 | -8.067884  |  |
| 17912 | Neoplasm | HLA-C     | 0.000032 | -7.979817  |  |
| 17913 | Neoplasm | GLDN      | 0        | -7.900203  |  |
| 17914 | Neoplasm | INSL5     | 0.000002 | -7.817222  |  |
| 17915 | Neoplasm | RNF217    | 0.00966  | -7.638889  |  |
| 17916 | Neoplasm | EML1      | 0.013577 | -7.611199  |  |
| 17917 | Neoplasm | JCLN      | 0        | -7.580735  |  |
| 17918 | Neoplasm | TACR2     | 0        | -7.516182  |  |
| 17919 | Neoplasm | SLC16A14  | 0.011625 | -7.472792  |  |
| 17920 | Neoplasm | MARK1     | 0.005692 | -7.342574  |  |
| 17921 | Neoplasm | TAF9B     | 0.010392 | -7.240622  |  |
| 17922 | Neoplasm | CLCA4     | 0        | -7.137504  |  |
| 17923 | Neoplasm | OSBPL6    | 0.003447 | -6.973452  |  |
| 17924 | Neoplasm | OR51E2    | 0        | -6.96699   |  |
| 17925 | Neoplasm | MMRN1     | 0.000018 | -6.936042  |  |
| 17926 | Neoplasm | EPHA7     | 0        | -6.874477  |  |
| 17927 | Neoplasm | HAND1     | 0        | -6.79748   |  |
| 17928 | Neoplasm | CPM       | 0        | -6.779395  |  |
| 17929 | Neoplasm | CA4       | 0        | -6.659526  |  |
| 17930 | Neoplasm | PIGZ      | 0.00064  | -6.641919  |  |
| 17931 | Neoplasm | FHOD3     | 0.007174 | -6.587318  |  |
| 17932 | Neoplasm | FLJ33996  | 0.008879 | -6.481953  |  |
| 17933 | Neoplasm | LOC440302 | 0.002833 | -6.480966  |  |
| 17934 | Neoplasm | LIN9      | 0.000021 | -6.468183  |  |
| 17935 | Neoplasm | AIM1L     | 0.001601 | -6.426495  |  |
| 17936 | Neoplasm | SCN7A     | 0        | -6.303923  |  |
| 17937 | Neoplasm | ZFYVE28   | 0.028592 | -6.296123  |  |
| 17938 | Neoplasm | AMPD1     | 0        | -6.229256  |  |
| 17939 | Neoplasm | SLC17A4   | 0        | -6.211751  |  |
| 17940 | Neoplasm | CLDN23    | 0        | -6.125699  |  |
| 17941 | Neoplasm | MYO5A     | 0.006913 | -6.015864  |  |
| 17942 | Neoplasm | TM4SF1    | 0.000456 | -6.003213  |  |
| 17943 | Neoplasm | GNAO1     | 0        | -5.938094  |  |
| 17944 | Neoplasm | CCR7      | 0        | -5.937196  |  |
| 17945 | Neoplasm | GOLGA9P   | 0.002632 | -5.921016  |  |
| 17946 | Neoplasm | ESPN      | 0.007977 | -5.850137  |  |
| 17947 | Neoplasm | IGJ       | 0.000115 | -5.661065  |  |
| 17948 | Neoplasm | CLEC3B    | 0        | -5.646384  |  |

|       |          |           |          |           |  |
|-------|----------|-----------|----------|-----------|--|
| 17949 | Neoplasm | PYGM      | 0        | -5.639726 |  |
| 17950 | Neoplasm | MYL9      | 0.000983 | -5.633666 |  |
| 17951 | Neoplasm | MUC4      | 0.000036 | -5.548673 |  |
| 17952 | Neoplasm | SEMA3D    | 0        | -5.539271 |  |
| 17953 | Neoplasm | POPDC2    | 0        | -5.538038 |  |
| 17954 | Neoplasm | CA12      | 0        | -5.531367 |  |
| 17955 | Neoplasm | NNAT      | 0        | -5.523662 |  |
| 17956 | Neoplasm | YPEL1     | 0.000257 | -5.42767  |  |
| 17957 | Neoplasm | HRNBP3    | 0        | -5.412331 |  |
| 17958 | Neoplasm | RBPM52    | 0        | -5.407643 |  |
| 17959 | Neoplasm | RIMS3     | 0.031932 | -5.391005 |  |
| 17960 | Neoplasm | CD177     | 0        | -5.309023 |  |
| 17961 | Neoplasm | EDN3      | 0.000002 | -5.280036 |  |
| 17962 | Neoplasm | KIF5C     | 0        | -5.213308 |  |
| 17963 | Neoplasm | COMMD1    | 0.005347 | -5.181986 |  |
| 17964 | Neoplasm | LOC389634 | 0.032934 | -5.130612 |  |
| 17965 | Neoplasm | MUCDHL    | 0.000006 | -5.11399  |  |
| 17966 | Neoplasm | LYVE1     | 0        | -5.099281 |  |
| 17967 | Neoplasm | C4orf34   | 0        | -5.07859  |  |
| 17968 | Neoplasm | FOSL1     | 0.001501 | -5.057825 |  |
| 17969 | Neoplasm | CLEC2D    | 0.001515 | -5.007768 |  |
| 17970 | Neoplasm | SDCBP2    | 0.000001 | -5.00517  |  |
| 17971 | Neoplasm | ADH1A     | 0        | -4.942129 |  |
| 17972 | Neoplasm | PDZRN4    | 0        | -4.918182 |  |
| 17973 | Neoplasm | ANKRD20A2 | 0        | -4.869268 |  |
| 17974 | Neoplasm | ADRA2C    | 0.00673  | -4.838363 |  |
| 17975 | Neoplasm | PLG       | 0.000037 | -4.831109 |  |
| 17976 | Neoplasm | RTN1      | 0.000009 | -4.816378 |  |
| 17977 | Neoplasm | LOC149134 | 0.000056 | -4.789165 |  |
| 17978 | Neoplasm | ANKRD18A  | 0.001132 | -4.780088 |  |
| 17979 | Neoplasm | RASL10A   | 0.023576 | -4.776279 |  |
| 17980 | Neoplasm | GNAL      | 0.011017 | -4.772214 |  |
| 17981 | Neoplasm | RNF112    | 0        | -4.763975 |  |
| 17982 | Neoplasm | FMN2      | 0        | -4.762531 |  |
| 17983 | Neoplasm | 3-Sep     | 0.013062 | -4.760085 |  |
| 17984 | Neoplasm | FOLR1     | 0.00455  | -4.7329   |  |
| 17985 | Neoplasm | F13A1     | 0        | -4.717275 |  |
| 17986 | Neoplasm | CNR1      | 0        | -4.666203 |  |
| 17987 | Neoplasm | NLGN3     | 0.021845 | -4.643915 |  |
| 17988 | Neoplasm | HSD11B2   | 0        | -4.642659 |  |
| 17989 | Neoplasm | CWH43     | 0        | -4.641098 |  |
| 17990 | Neoplasm | CILP      | 0        | -4.580109 |  |
| 17991 | Neoplasm | REP15     | 0        | -4.575296 |  |
| 17992 | Neoplasm | KIAA1920  | 0.006147 | -4.564109 |  |
| 17993 | Neoplasm | ABCC13    | 0.00001  | -4.56359  |  |
| 17994 | Neoplasm | RECK      | 0.00532  | -4.54864  |  |
| 17995 | Neoplasm | CHN1      | 0.007548 | -4.534394 |  |
| 17996 | Neoplasm | ANXA1     | 0.001093 | -4.504772 |  |
| 17997 | Neoplasm | MGC4172   | 0        | -4.475538 |  |
| 17998 | Neoplasm | APBB2     | 0.0055   | -4.461363 |  |

|       |          |           |          |           |  |
|-------|----------|-----------|----------|-----------|--|
| 17999 | Neoplasm | CDH19     | 0        | -4.455978 |  |
| 18000 | Neoplasm | PI16      | 0        | -4.454597 |  |
| 18001 | Neoplasm | SPARCL1   | 0        | -4.431656 |  |
| 18002 | Neoplasm | DIXDC1    | 0.000031 | -4.430355 |  |
| 18003 | Neoplasm | TSPAN1    | 0.000001 | -4.421269 |  |
| 18004 | Neoplasm | ABLIM2    | 0.030738 | -4.41836  |  |
| 18005 | Neoplasm | TXNRD1    | 0.000971 | -4.409184 |  |
| 18006 | Neoplasm | MAOB      | 0        | -4.38741  |  |
| 18007 | Neoplasm | TTL7      | 0.00057  | -4.381729 |  |
| 18008 | Neoplasm | NEO1      | 0.003073 | -4.378099 |  |
| 18009 | Neoplasm | NTN1      | 0        | -4.369826 |  |
| 18010 | Neoplasm | DUSP5     | 0.002893 | -4.355168 |  |
| 18011 | Neoplasm | FLJ32063  | 0.00001  | -4.349534 |  |
| 18012 | Neoplasm | MT1P2     | 0.002776 | -4.347342 |  |
| 18013 | Neoplasm | TNS1      | 0        | -4.345642 |  |
| 18014 | Neoplasm | NCEH1     | 0.003543 | -4.34024  |  |
| 18015 | Neoplasm | FRMD4A    | 0.004723 | -4.336177 |  |
| 18016 | Neoplasm | AP1S3     | 0.002644 | -4.331429 |  |
| 18017 | Neoplasm | C1orf67   | 0.009553 | -4.33118  |  |
| 18018 | Neoplasm | GRASP     | 0.03682  | -4.326048 |  |
| 18019 | Neoplasm | PLCD3     | 0.003048 | -4.324389 |  |
| 18020 | Neoplasm | SPINK5    | 0.000007 | -4.320209 |  |
| 18021 | Neoplasm | MT1JP     | 0        | -4.303425 |  |
| 18022 | Neoplasm | TNXA      | 0.000599 | -4.287645 |  |
| 18023 | Neoplasm | FLJ10357  | 0.01336  | -4.287287 |  |
| 18024 | Neoplasm | TUBB2A    | 0.00203  | -4.280061 |  |
| 18025 | Neoplasm | GCLM      | 0.003155 | -4.246441 |  |
| 18026 | Neoplasm | DMD       | 0        | -4.231737 |  |
| 18027 | Neoplasm | TMEM136   | 0.011149 | -4.229345 |  |
| 18028 | Neoplasm | CCDC29    | 0.010139 | -4.223237 |  |
| 18029 | Neoplasm | HIGD1A    | 0        | -4.221989 |  |
| 18030 | Neoplasm | CES2      | 0.000001 | -4.217799 |  |
| 18031 | Neoplasm | DUXAP10   | 0.010683 | -4.194812 |  |
| 18032 | Neoplasm | FRZB      | 0        | -4.185366 |  |
| 18033 | Neoplasm | GGT7      | 0.000807 | -4.185339 |  |
| 18034 | Neoplasm | GFI1      | 0.000876 | -4.145906 |  |
| 18035 | Neoplasm | H2BFS     | 0.000199 | -4.137364 |  |
| 18036 | Neoplasm | DZIP1L    | 0.00824  | -4.128642 |  |
| 18037 | Neoplasm | SCG2      | 0        | -4.0968   |  |
| 18038 | Neoplasm | ANKRD20B  | 0.007322 | -4.092036 |  |
| 18039 | Neoplasm | ADCY5     | 0        | -4.08228  |  |
| 18040 | Neoplasm | TBRG4     | 0.039971 | -4.077619 |  |
| 18041 | Neoplasm | C19orf33  | 0.000971 | -4.077605 |  |
| 18042 | Neoplasm | JMJD2C    | 0.000278 | -4.077496 |  |
| 18043 | Neoplasm | FGFR1     | 0.003111 | -4.076248 |  |
| 18044 | Neoplasm | DSCR1L1   | 0        | -4.065147 |  |
| 18045 | Neoplasm | TMEM16E   | 0        | -4.062872 |  |
| 18046 | Neoplasm | FXYD3     | 0        | -4.060949 |  |
| 18047 | Neoplasm | C11orf33  | 0.000012 | -4.060275 |  |
| 18048 | Neoplasm | LOC727770 | 0.00775  | -4.056873 |  |

|       |          |             |          |           |  |
|-------|----------|-------------|----------|-----------|--|
| 18049 | Neoplasm | hCG_1776259 | 0.000229 | -4.051954 |  |
| 18050 | Neoplasm | PTK7        | 0.003109 | -4.015131 |  |
| 18051 | Neoplasm | JARID1D     | 0        | -3.998035 |  |
| 18052 | Neoplasm | CAP2        | 0        | -3.956912 |  |
| 18053 | Neoplasm | FAM151A     | 0        | -3.955291 |  |
| 18054 | Neoplasm | TCP11L2     | 0.003151 | -3.946101 |  |
| 18055 | Neoplasm | INSM1       | 0        | -3.935096 |  |
| 18056 | Neoplasm | PPP1R14A    | 0        | -3.931288 |  |
| 18057 | Neoplasm | CCDC46      | 0.001963 | -3.926507 |  |
| 18058 | Neoplasm | LARP6       | 0.0088   | -3.920801 |  |
| 18059 | Neoplasm | NEU4        | 0.000001 | -3.914172 |  |
| 18060 | Neoplasm | LEFTY1      | 0.023473 | -3.90932  |  |
| 18061 | Neoplasm | SLC22A23    | 0        | -3.901711 |  |
| 18062 | Neoplasm | PLA2G10     | 0.000013 | -3.896015 |  |
| 18063 | Neoplasm | GLUD1       | 0.000349 | -3.895446 |  |
| 18064 | Neoplasm | LOC284120   | 0.019682 | -3.888264 |  |
| 18065 | Neoplasm | CFL2        | 0        | -3.885567 |  |
| 18066 | Neoplasm | IQGAP2      | 0        | -3.87736  |  |
| 18067 | Neoplasm | ZNF204      | 0.007006 | -3.871358 |  |
| 18068 | Neoplasm | LOC644662   | 0.019548 | -3.850669 |  |
| 18069 | Neoplasm | RASSF8      | 0.015238 | -3.833393 |  |
| 18070 | Neoplasm | SLC4A8      | 0.002264 | -3.806897 |  |
| 18071 | Neoplasm | MPP2        | 0.003307 | -3.806164 |  |
| 18072 | Neoplasm | ALPI        | 0        | -3.776042 |  |
| 18073 | Neoplasm | DPP6        | 0        | -3.769505 |  |
| 18074 | Neoplasm | GADD45A     | 0.002622 | -3.749182 |  |
| 18075 | Neoplasm | NMES1       | 0        | -3.734037 |  |
| 18076 | Neoplasm | MGC24975    | 0.021845 | -3.725756 |  |
| 18077 | Neoplasm | HOXB4       | 0.021845 | -3.702856 |  |
| 18078 | Neoplasm | LOC286272   | 0.042711 | -3.698942 |  |
| 18079 | Neoplasm | SLC4A3      | 0.004901 | -3.697639 |  |
| 18080 | Neoplasm | TEP1        | 0.000306 | -3.688525 |  |
| 18081 | Neoplasm | SNIP        | 0.018508 | -3.684335 |  |
| 18082 | Neoplasm | NFKBIB      | 0.001934 | -3.659229 |  |
| 18083 | Neoplasm | MEP1A       | 0        | -3.653428 |  |
| 18084 | Neoplasm | P2RY14      | 0.000446 | -3.628568 |  |
| 18085 | Neoplasm | BEX1        | 0        | -3.617089 |  |
| 18086 | Neoplasm | SCG3        | 0        | -3.610162 |  |
| 18087 | Neoplasm | TEX11       | 0        | -3.602828 |  |
| 18088 | Neoplasm | GHR         | 0        | -3.600481 |  |
| 18089 | Neoplasm | TNFRSF19    | 0.00673  | -3.596454 |  |
| 18090 | Neoplasm | DSC2        | 0.000004 | -3.593929 |  |
| 18091 | Neoplasm | SOSTDC1     | 0.000002 | -3.574382 |  |
| 18092 | Neoplasm | ZBTB10      | 0.015219 | -3.570175 |  |
| 18093 | Neoplasm | AKAP12      | 0.000109 | -3.559876 |  |
| 18094 | Neoplasm | C2orf40     | 0        | -3.530774 |  |
| 18095 | Neoplasm | SVIL        | 0        | -3.527754 |  |
| 18096 | Neoplasm | HSD17B2     | 0.00001  | -3.522316 |  |
| 18097 | Neoplasm | HIST1H2BH   | 0.000401 | -3.516686 |  |
| 18098 | Neoplasm | ROR1        | 0        | -3.509181 |  |

|       |          |             |          |           |  |
|-------|----------|-------------|----------|-----------|--|
| 18099 | Neoplasm | TACC1       | 0.001012 | -3.504349 |  |
| 18100 | Neoplasm | RHBDL2      | 0        | -3.502465 |  |
| 18101 | Neoplasm | C17orf91    | 0        | -3.497267 |  |
| 18102 | Neoplasm | KIAA1467    | 0.041857 | -3.495127 |  |
| 18103 | Neoplasm | USP2        | 0        | -3.494292 |  |
| 18104 | Neoplasm | NSMAF       | 0        | -3.490679 |  |
| 18105 | Neoplasm | GJB3        | 0.001571 | -3.488437 |  |
| 18106 | Neoplasm | RFX6        | 0        | -3.483487 |  |
| 18107 | Neoplasm | TNFRSF17    | 0        | -3.482547 |  |
| 18108 | Neoplasm | ZNF559      | 0.04222  | -3.479822 |  |
| 18109 | Neoplasm | ZNF396      | 0.021845 | -3.477483 |  |
| 18110 | Neoplasm | TECTA       | 0.009208 | -3.467115 |  |
| 18111 | Neoplasm | MTSS1       | 0.000145 | -3.463537 |  |
| 18112 | Neoplasm | TBRG1       | 0.0001   | -3.460295 |  |
| 18113 | Neoplasm | PRKG2       | 0        | -3.453657 |  |
| 18114 | Neoplasm | EPHA10      | 0.000008 | -3.435053 |  |
| 18115 | Neoplasm | GPA33       | 0.000001 | -3.429682 |  |
| 18116 | Neoplasm | CDKL2       | 0        | -3.426307 |  |
| 18117 | Neoplasm | CD47        | 0        | -3.425163 |  |
| 18118 | Neoplasm | KRT19       | 0.000002 | -3.421713 |  |
| 18119 | Neoplasm | B3GALT5     | 0        | -3.421405 |  |
| 18120 | Neoplasm | IER3        | 0.001481 | -3.421316 |  |
| 18121 | Neoplasm | NBEA        | 0        | -3.41054  |  |
| 18122 | Neoplasm | MMP28       | 0        | -3.407586 |  |
| 18123 | Neoplasm | CCDC68      | 0        | -3.401939 |  |
| 18124 | Neoplasm | NR5A2       | 0.000094 | -3.394343 |  |
| 18125 | Neoplasm | EYA2        | 0        | -3.391627 |  |
| 18126 | Neoplasm | ZBTB16      | 0        | -3.381649 |  |
| 18127 | Neoplasm | LILRB5      | 0        | -3.379378 |  |
| 18128 | Neoplasm | ACBD7       | 0.002306 | -3.371246 |  |
| 18129 | Neoplasm | GPR143      | 0.001153 | -3.368676 |  |
| 18130 | Neoplasm | ARL4D       | 0.007212 | -3.366434 |  |
| 18131 | Neoplasm | METTL2A     | 0.006997 | -3.361801 |  |
| 18132 | Neoplasm | LOC440896   | 0.001452 | -3.357173 |  |
| 18133 | Neoplasm | RIMBP3      | 0.042322 | -3.3527   |  |
| 18134 | Neoplasm | CBX7        | 0        | -3.346332 |  |
| 18135 | Neoplasm | DCN         | 0.000641 | -3.343137 |  |
| 18136 | Neoplasm | GPT         | 0        | -3.336013 |  |
| 18137 | Neoplasm | SLC7A2      | 0.000037 | -3.332803 |  |
| 18138 | Neoplasm | SERPINB9    | 0.004372 | -3.332031 |  |
| 18139 | Neoplasm | FXYD1       | 0        | -3.331368 |  |
| 18140 | Neoplasm | TIPARP      | 0.001076 | -3.323843 |  |
| 18141 | Neoplasm | SCN8A       | 0.005008 | -3.313073 |  |
| 18142 | Neoplasm | INA         | 0        | -3.294364 |  |
| 18143 | Neoplasm | ABCC6       | 0.008661 | -3.29217  |  |
| 18144 | Neoplasm | DKFZP564O08 | 0.000001 | -3.288601 |  |
| 18145 | Neoplasm | IL11RA      | 0        | -3.283501 |  |
| 18146 | Neoplasm | GDA         | 0.000949 | -3.2778   |  |
| 18147 | Neoplasm | ADH1C       | 0        | -3.263362 |  |
| 18148 | Neoplasm | CACNB2      | 0        | -3.256055 |  |

|       |          |              |          |           |  |
|-------|----------|--------------|----------|-----------|--|
| 18149 | Neoplasm | CTSG         | 0        | -3.250081 |  |
| 18150 | Neoplasm | SMAD3        | 0.003967 | -3.241167 |  |
| 18151 | Neoplasm | IFRD1        | 0.000456 | -3.231977 |  |
| 18152 | Neoplasm | KLRB1        | 0        | -3.231369 |  |
| 18153 | Neoplasm | GPRASP2      | 0.011255 | -3.229416 |  |
| 18154 | Neoplasm | ATP8B1       | 0        | -3.228551 |  |
| 18155 | Neoplasm | DSCAML1      | 0        | -3.228012 |  |
| 18156 | Neoplasm | RFESD        | 0.007548 | -3.218537 |  |
| 18157 | Neoplasm | CNNM4        | 0        | -3.209167 |  |
| 18158 | Neoplasm | HLA-DQB1     | 0.013951 | -3.207945 |  |
| 18159 | Neoplasm | TXNIP        | 0        | -3.20474  |  |
| 18160 | Neoplasm | FOXF1        | 0.000296 | -3.198543 |  |
| 18161 | Neoplasm | CCDC18       | 0        | -3.194796 |  |
| 18162 | Neoplasm | PFKFB1       | 0.035536 | -3.186372 |  |
| 18163 | Neoplasm | PTGER4       | 0        | -3.176752 |  |
| 18164 | Neoplasm | BRP44L       | 0        | -3.173014 |  |
| 18165 | Neoplasm | GPRC5A       | 0.003894 | -3.17029  |  |
| 18166 | Neoplasm | ACRBP        | 0.01081  | -3.16471  |  |
| 18167 | Neoplasm | FKBP4        | 0.002764 | -3.15985  |  |
| 18168 | Neoplasm | MFI2         | 0.004051 | -3.156531 |  |
| 18169 | Neoplasm | PDE4D        | 0        | -3.150488 |  |
| 18170 | Neoplasm | TMEM220      | 0        | -3.143404 |  |
| 18171 | Neoplasm | SIDT1        | 0        | -3.139651 |  |
| 18172 | Neoplasm | SCNN1A       | 0.000005 | -3.135971 |  |
| 18173 | Neoplasm | IER5         | 0.006768 | -3.134763 |  |
| 18174 | Neoplasm | FBLN1        | 0        | -3.123876 |  |
| 18175 | Neoplasm | NBLA00301    | 0        | -3.122942 |  |
| 18176 | Neoplasm | TP53I5       | 0.000002 | -3.120461 |  |
| 18177 | Neoplasm | SNX10        | 0.013926 | -3.114328 |  |
| 18178 | Neoplasm | FAM162A      | 0        | -3.112417 |  |
| 18179 | Neoplasm | FLJ20152     | 0.000005 | -3.093667 |  |
| 18180 | Neoplasm | TST          | 0.000001 | -3.086522 |  |
| 18181 | Neoplasm | RAB27A       | 0        | -3.084845 |  |
| 18182 | Neoplasm | LOC374443    | 0.009553 | -3.083184 |  |
| 18183 | Neoplasm | C5orf4       | 0        | -3.081489 |  |
| 18184 | Neoplasm | ZNF503       | 0.008386 | -3.080527 |  |
| 18185 | Neoplasm | FAM167A      | 0.006978 | -3.079468 |  |
| 18186 | Neoplasm | RHOF         | 0.002825 | -3.060426 |  |
| 18187 | Neoplasm | MAFF         | 0.001055 | -3.059935 |  |
| 18188 | Neoplasm | C6orf29      | 0.000003 | -3.059207 |  |
| 18189 | Neoplasm | DNAH14       | 0.006182 | -3.054123 |  |
| 18190 | Neoplasm | NQO1         | 0.001934 | -3.052136 |  |
| 18191 | Neoplasm | MLXIPL       | 0.001005 | -3.044892 |  |
| 18192 | Neoplasm | LOC100132288 | 0.003307 | -3.042215 |  |
| 18193 | Neoplasm | PIGR         | 0.000268 | -3.039826 |  |
| 18194 | Neoplasm | LOC100133572 | 0.00044  | -3.038936 |  |
| 18195 | Neoplasm | PDLIM3       | 0.00997  | -3.035388 |  |
| 18196 | Neoplasm | POLN         | 0.006577 | -3.027885 |  |
| 18197 | Neoplasm | DPT          | 0        | -3.027548 |  |
| 18198 | Neoplasm | HIG1         | 0.000002 | -3.027138 |  |

|       |          |              |          |           |  |
|-------|----------|--------------|----------|-----------|--|
| 18199 | Neoplasm | NEUROD1      | 0        | -3.026664 |  |
| 18200 | Neoplasm | MT1E         | 0        | -3.02559  |  |
| 18201 | Neoplasm | CALHM2       | 0.009282 | -3.023566 |  |
| 18202 | Neoplasm | BCLP         | 0.000001 | -3.020425 |  |
| 18203 | Neoplasm | ZNF575       | 0        | -3.018086 |  |
| 18204 | Neoplasm | ACACB        | 0.000014 | -3.000493 |  |
| 18205 | Neoplasm | CPA3         | 0        | -2.996718 |  |
| 18206 | Neoplasm | C2orf88      | 0        | -2.994556 |  |
| 18207 | Neoplasm | LOC100128288 | 0.010175 | -2.991754 |  |
| 18208 | Neoplasm | VSTM2A       | 0        | -2.990994 |  |
| 18209 | Neoplasm | DCLK1        | 0        | -2.977075 |  |
| 18210 | Neoplasm | MR1          | 0.000015 | -2.97589  |  |
| 18211 | Neoplasm | DEFB1        | 0.000061 | -2.97051  |  |
| 18212 | Neoplasm | HRK          | 0.007558 | -2.96953  |  |
| 18213 | Neoplasm | MYO1A        | 0.000007 | -2.962363 |  |
| 18214 | Neoplasm | FAM3D        | 0.000002 | -2.95883  |  |
| 18215 | Neoplasm | TM4SF2       | 0.000002 | -2.95869  |  |
| 18216 | Neoplasm | TUBB2B       | 0.000163 | -2.956319 |  |
| 18217 | Neoplasm | CBLN2        | 0        | -2.947698 |  |
| 18218 | Neoplasm | PHLPPL       | 0        | -2.947295 |  |
| 18219 | Neoplasm | C6orf168     | 0.007977 | -2.944648 |  |
| 18220 | Neoplasm | GAGE12F      | 0.002593 | -2.935788 |  |
| 18221 | Neoplasm | MT1L         | 0.012569 | -2.931789 |  |
| 18222 | Neoplasm | SMPD3        | 0.000001 | -2.930047 |  |
| 18223 | Neoplasm | IFFO2        | 0.003963 | -2.927913 |  |
| 18224 | Neoplasm | SERTAD2      | 0.001331 | -2.923702 |  |
| 18225 | Neoplasm | ZNF165       | 0.002355 | -2.914214 |  |
| 18226 | Neoplasm | GPX3         | 0.000109 | -2.906212 |  |
| 18227 | Neoplasm | DHRS11       | 0.000418 | -2.904213 |  |
| 18228 | Neoplasm | KRT14        | 0.000004 | -2.898214 |  |
| 18229 | Neoplasm | TTC18        | 0.009553 | -2.893427 |  |
| 18230 | Neoplasm | JDP2         | 0.013717 | -2.891871 |  |
| 18231 | Neoplasm | PRIC285      | 0        | -2.887749 |  |
| 18232 | Neoplasm | PPAP2A       | 0        | -2.884461 |  |
| 18233 | Neoplasm | VILL         | 0.000003 | -2.882666 |  |
| 18234 | Neoplasm | STX6         | 0.019548 | -2.881852 |  |
| 18235 | Neoplasm | RND3         | 0.000038 | -2.872728 |  |
| 18236 | Neoplasm | EPB49        | 0.041352 | -2.864503 |  |
| 18237 | Neoplasm | CDKN2B       | 0.000179 | -2.863855 |  |
| 18238 | Neoplasm | CALCOCO2     | 0.007534 | -2.863197 |  |
| 18239 | Neoplasm | MUSTN1       | 0        | -2.844608 |  |
| 18240 | Neoplasm | ST6GALNAC6   | 0        | -2.840149 |  |
| 18241 | Neoplasm | CYP4F12      | 0.000003 | -2.837124 |  |
| 18242 | Neoplasm | C9orf61      | 0        | -2.833333 |  |
| 18243 | Neoplasm | SHROOM2      | 0.003869 | -2.831886 |  |
| 18244 | Neoplasm | PCSK5        | 0        | -2.830533 |  |
| 18245 | Neoplasm | MAML2        | 0        | -2.829664 |  |
| 18246 | Neoplasm | CLDN7        | 0.000004 | -2.827828 |  |
| 18247 | Neoplasm | F2           | 0.023757 | -2.822927 |  |
| 18248 | Neoplasm | TMEM45B      | 0.000002 | -2.820958 |  |



|       |          |              |          |           |  |
|-------|----------|--------------|----------|-----------|--|
| 18249 | Neoplasm | ERRFI1       | 0.000738 | -2.815094 |  |
| 18250 | Neoplasm | HIST1H2BD    | 0.002609 | -2.811862 |  |
| 18251 | Neoplasm | CASD1        | 0        | -2.80623  |  |
| 18252 | Neoplasm | NAIP         | 0.003138 | -2.800591 |  |
| 18253 | Neoplasm | C14orf139    | 0        | -2.797652 |  |
| 18254 | Neoplasm | CHST5        | 0.000004 | -2.795886 |  |
| 18255 | Neoplasm | HIST1H2BI    | 0.000973 | -2.794488 |  |
| 18256 | Neoplasm | PPARGC1A     | 0.000012 | -2.794212 |  |
| 18257 | Neoplasm | TBCEL        | 0.004372 | -2.792979 |  |
| 18258 | Neoplasm | CHORDC1      | 0.006682 | -2.792148 |  |
| 18259 | Neoplasm | LOC652005    | 0.014757 | -2.78945  |  |
| 18260 | Neoplasm | HIST1H2AD    | 0.001452 | -2.787514 |  |
| 18261 | Neoplasm | RGS19IP1     | 0.00001  | -2.784519 |  |
| 18262 | Neoplasm | AFF3         | 0        | -2.783452 |  |
| 18263 | Neoplasm | FLJ11017     | 0.000002 | -2.782371 |  |
| 18264 | Neoplasm | BFSP1        | 0.001604 | -2.782365 |  |
| 18265 | Neoplasm | C11orf63     | 0.000128 | -2.77536  |  |
| 18266 | Neoplasm | CLDN4        | 0.001197 | -2.769576 |  |
| 18267 | Neoplasm | LRRC1        | 0.000013 | -2.764394 |  |
| 18268 | Neoplasm | DISP2        | 0        | -2.755855 |  |
| 18269 | Neoplasm | ABCC8        | 0        | -2.755043 |  |
| 18270 | Neoplasm | PGBD1        | 0.0097   | -2.75087  |  |
| 18271 | Neoplasm | CD59         | 0.002521 | -2.749877 |  |
| 18272 | Neoplasm | TUB          | 0.000002 | -2.748186 |  |
| 18273 | Neoplasm | GABPB1       | 0.002342 | -2.746774 |  |
| 18274 | Neoplasm | KIAA0574     | 0        | -2.743239 |  |
| 18275 | Neoplasm | TMEM98       | 0.007833 | -2.741353 |  |
| 18276 | Neoplasm | PDE5A        | 0.000791 | -2.738766 |  |
| 18277 | Neoplasm | MT4          | 0.009717 | -2.735925 |  |
| 18278 | Neoplasm | EHD1         | 0.002556 | -2.735799 |  |
| 18279 | Neoplasm | CLYBL        | 0.00019  | -2.733223 |  |
| 18280 | Neoplasm | KIAA1586     | 0.009932 | -2.730824 |  |
| 18281 | Neoplasm | CCL14        | 0.00017  | -2.725208 |  |
| 18282 | Neoplasm | MGC4171      | 0.00001  | -2.724735 |  |
| 18283 | Neoplasm | CEP70        | 0.014313 | -2.723069 |  |
| 18284 | Neoplasm | KIT          | 0        | -2.722354 |  |
| 18285 | Neoplasm | TPK1         | 0.012249 | -2.715114 |  |
| 18286 | Neoplasm | MTL5         | 0.003175 | -2.707026 |  |
| 18287 | Neoplasm | GOLPH2       | 0.000005 | -2.702898 |  |
| 18288 | Neoplasm | PBRM1        | 0.004716 | -2.702513 |  |
| 18289 | Neoplasm | HIST1H2BK    | 0.000971 | -2.69846  |  |
| 18290 | Neoplasm | PPL          | 0.004048 | -2.698124 |  |
| 18291 | Neoplasm | MYL6         | 0        | -2.69657  |  |
| 18292 | Neoplasm | RAD51C       | 0.000145 | -2.695589 |  |
| 18293 | Neoplasm | UTRN         | 0.000897 | -2.694507 |  |
| 18294 | Neoplasm | PXDN         | 0.009941 | -2.692994 |  |
| 18295 | Neoplasm | C16orf89     | 0        | -2.685176 |  |
| 18296 | Neoplasm | HIST1H2BE    | 0.000348 | -2.681598 |  |
| 18297 | Neoplasm | SATB2        | 0.000007 | -2.679973 |  |
| 18298 | Neoplasm | LOC100505584 | 0.007414 | -2.672755 |  |

|       |          |           |          |           |  |
|-------|----------|-----------|----------|-----------|--|
| 18299 | Neoplasm | CTNND2    | 0        | -2.672752 |  |
| 18300 | Neoplasm | ATL1      | 0.00856  | -2.672005 |  |
| 18301 | Neoplasm | CGN       | 0.000009 | -2.669418 |  |
| 18302 | Neoplasm | LOC728047 | 0.00775  | -2.666216 |  |
| 18303 | Neoplasm | TMOD3     | 0.000971 | -2.662719 |  |
| 18304 | Neoplasm | ACADS     | 0        | -2.654603 |  |
| 18305 | Neoplasm | PDGFRA    | 0        | -2.653227 |  |
| 18306 | Neoplasm | TTRAP     | 0        | -2.65296  |  |
| 18307 | Neoplasm | HIST1H4D  | 0.011245 | -2.651001 |  |
| 18308 | Neoplasm | PROM2     | 0.001214 | -2.647331 |  |
| 18309 | Neoplasm | KLB       | 0        | -2.644092 |  |
| 18310 | Neoplasm | TACC2     | 0        | -2.643764 |  |
| 18311 | Neoplasm | LOC283454 | 0        | -2.641204 |  |
| 18312 | Neoplasm | DPH3      | 0.003586 | -2.639339 |  |
| 18313 | Neoplasm | LOC199800 | 0.037332 | -2.637131 |  |
| 18314 | Neoplasm | SMG7      | 0.00313  | -2.625613 |  |
| 18315 | Neoplasm | HSD17B6   | 0.000957 | -2.620009 |  |
| 18316 | Neoplasm | AOC3      | 0        | -2.617512 |  |
| 18317 | Neoplasm | KIAA0513  | 0        | -2.615759 |  |
| 18318 | Neoplasm | CYP20A1   | 0.003548 | -2.613685 |  |
| 18319 | Neoplasm | PXMP2     | 0        | -2.613262 |  |
| 18320 | Neoplasm | IL17RB    | 0.004078 | -2.609437 |  |
| 18321 | Neoplasm | PIP5K1B   | 0.000006 | -2.603886 |  |
| 18322 | Neoplasm | ANXA2P2   | 0.003101 | -2.59763  |  |
| 18323 | Neoplasm | FLNC      | 0.000273 | -2.597163 |  |
| 18324 | Neoplasm | SSBP2     | 0        | -2.589961 |  |
| 18325 | Neoplasm | STAP2     | 0        | -2.586791 |  |
| 18326 | Neoplasm | ITM2A     | 0        | -2.583142 |  |
| 18327 | Neoplasm | FMO4      | 0.000009 | -2.582345 |  |
| 18328 | Neoplasm | PTD012    | 0        | -2.571727 |  |
| 18329 | Neoplasm | ORMDL2    | 0.003586 | -2.567817 |  |
| 18330 | Neoplasm | NUB1      | 0.002696 | -2.567548 |  |
| 18331 | Neoplasm | MTHFSD    | 0.003134 | -2.56662  |  |
| 18332 | Neoplasm | CKMT1     | 0.000013 | -2.56467  |  |
| 18333 | Neoplasm | SQSTM1    | 0.003381 | -2.564317 |  |
| 18334 | Neoplasm | FLJ30901  | 0        | -2.56354  |  |
| 18335 | Neoplasm | RALA      | 0.002521 | -2.560907 |  |
| 18336 | Neoplasm | EIF3F     | 0.000568 | -2.560412 |  |
| 18337 | Neoplasm | PSMD12    | 0.000878 | -2.55911  |  |
| 18338 | Neoplasm | LOC728897 | 0.002375 | -2.557461 |  |
| 18339 | Neoplasm | FAM69A    | 0.043208 | -2.55646  |  |
| 18340 | Neoplasm | GSTM3     | 0.000427 | -2.553493 |  |
| 18341 | Neoplasm | ZNF33A    | 0.02751  | -2.540084 |  |
| 18342 | Neoplasm | NANS      | 0.000001 | -2.539289 |  |
| 18343 | Neoplasm | CNGA3     | 0        | -2.530801 |  |
| 18344 | Neoplasm | SYNJ2BP   | 0.003111 | -2.524137 |  |
| 18345 | Neoplasm | PSMC4     | 0.001866 | -2.52329  |  |
| 18346 | Neoplasm | TDE2L     | 0.000006 | -2.522827 |  |
| 18347 | Neoplasm | TEF       | 0        | -2.522685 |  |
| 18348 | Neoplasm | LOC201895 | 0.000001 | -2.520197 |  |

|       |          |           |          |           |  |
|-------|----------|-----------|----------|-----------|--|
| 18349 | Neoplasm | TBXAS1    | 0.019548 | -2.51981  |  |
| 18350 | Neoplasm | SPATA6    | 0.011536 | -2.51343  |  |
| 18351 | Neoplasm | MYH10     | 0.012046 | -2.501664 |  |
| 18352 | Neoplasm | GNAI1     | 0.000428 | -2.500595 |  |
| 18353 | Neoplasm | CHMP2B    | 0.003529 | -2.500537 |  |
| 18354 | Neoplasm | HIST1H2BF | 0.000036 | -2.495865 |  |
| 18355 | Neoplasm | GPLD1     | 0.015141 | -2.492915 |  |
| 18356 | Neoplasm | STX8      | 0.003035 | -2.492302 |  |
| 18357 | Neoplasm | LRRC27    | 0.006344 | -2.492235 |  |
| 18358 | Neoplasm | FLJ20273  | 0.000008 | -2.483385 |  |
| 18359 | Neoplasm | SFN       | 0.003433 | -2.482749 |  |
| 18360 | Neoplasm | ESF1      | 0.014293 | -2.481679 |  |
| 18361 | Neoplasm | ARHGAP44  | 0        | -2.479384 |  |
| 18362 | Neoplasm | YRDC      | 0.000454 | -2.478321 |  |
| 18363 | Neoplasm | PARD6B    | 0.002438 | -2.474391 |  |
| 18364 | Neoplasm | KIAA0802  | 0.007178 | -2.470119 |  |
| 18365 | Neoplasm | PLIN      | 0        | -2.469331 |  |
| 18366 | Neoplasm | LMNA      | 0        | -2.46552  |  |
| 18367 | Neoplasm | CDV3      | 0.001501 | -2.464801 |  |
| 18368 | Neoplasm | GNA11     | 0        | -2.459933 |  |
| 18369 | Neoplasm | XRRA1     | 0.000059 | -2.459166 |  |
| 18370 | Neoplasm | ILDR2     | 0.010829 | -2.455843 |  |
| 18371 | Neoplasm | SNX5      | 0.019682 | -2.452863 |  |
| 18372 | Neoplasm | FBLN5     | 0.000608 | -2.450308 |  |
| 18373 | Neoplasm | TMEM16G   | 0        | -2.449522 |  |
| 18374 | Neoplasm | LOC728448 | 0.026406 | -2.448021 |  |
| 18375 | Neoplasm | ANK3      | 0        | -2.447477 |  |
| 18376 | Neoplasm | ABTB2     | 0.002911 | -2.445905 |  |
| 18377 | Neoplasm | GPR132    | 0.009949 | -2.438478 |  |
| 18378 | Neoplasm | HIPK2     | 0.005659 | -2.437563 |  |
| 18379 | Neoplasm | FLJ34515  | 0        | -2.434938 |  |
| 18380 | Neoplasm | C16orf46  | 0.009657 | -2.433476 |  |
| 18381 | Neoplasm | SLC36A1   | 0        | -2.431548 |  |
| 18382 | Neoplasm | C11orf65  | 0.004241 | -2.427485 |  |
| 18383 | Neoplasm | STIP1     | 0.0035   | -2.426644 |  |
| 18384 | Neoplasm | FAM95B1   | 0.010036 | -2.426516 |  |
| 18385 | Neoplasm | SUGT1     | 0.01256  | -2.426019 |  |
| 18386 | Neoplasm | PSMA7     | 0.001063 | -2.423479 |  |
| 18387 | Neoplasm | C3orf34   | 0.017983 | -2.423243 |  |
| 18388 | Neoplasm | ESCO1     | 0        | -2.420007 |  |
| 18389 | Neoplasm | C14orf145 | 0.000527 | -2.416938 |  |
| 18390 | Neoplasm | AKAP9     | 0        | -2.41686  |  |
| 18391 | Neoplasm | KRT8      | 0.002996 | -2.415704 |  |
| 18392 | Neoplasm | MAMLD1    | 0.002865 | -2.415506 |  |
| 18393 | Neoplasm | CAMK2D    | 0        | -2.411323 |  |
| 18394 | Neoplasm | WWC2      | 0.001321 | -2.40907  |  |
| 18395 | Neoplasm | WSCD1     | 0        | -2.408483 |  |
| 18396 | Neoplasm | IGHA1     | 0.00002  | -2.402752 |  |
| 18397 | Neoplasm | LTBP4     | 0        | -2.401606 |  |
| 18398 | Neoplasm | PHLDA2    | 0.000351 | -2.397214 |  |

|       |          |              |          |           |  |
|-------|----------|--------------|----------|-----------|--|
| 18399 | Neoplasm | RSPO2        | 0        | -2.395995 |  |
| 18400 | Neoplasm | TUBA1A       | 0.005009 | -2.390564 |  |
| 18401 | Neoplasm | CDKL1        | 0        | -2.390308 |  |
| 18402 | Neoplasm | ZNF23        | 0.01363  | -2.389468 |  |
| 18403 | Neoplasm | C17orf81     | 0.006933 | -2.388388 |  |
| 18404 | Neoplasm | RIOK3        | 0.000007 | -2.387403 |  |
| 18405 | Neoplasm | GLIPR2       | 0        | -2.384521 |  |
| 18406 | Neoplasm | SERPINA3     | 0.000286 | -2.383856 |  |
| 18407 | Neoplasm | TICAM1       | 0.002593 | -2.373531 |  |
| 18408 | Neoplasm | VPS4B        | 0        | -2.372544 |  |
| 18409 | Neoplasm | PCSK6        | 0.000006 | -2.366172 |  |
| 18410 | Neoplasm | BARX2        | 0        | -2.355854 |  |
| 18411 | Neoplasm | POLR2E       | 0.008616 | -2.351994 |  |
| 18412 | Neoplasm | STOX2        | 0.011178 | -2.350231 |  |
| 18413 | Neoplasm | TNFAIP1      | 0.003833 | -2.33892  |  |
| 18414 | Neoplasm | PSMD8        | 0.001734 | -2.338625 |  |
| 18415 | Neoplasm | SPAG9        | 0.003672 | -2.338502 |  |
| 18416 | Neoplasm | FOXN3        | 0        | -2.338288 |  |
| 18417 | Neoplasm | ARMCX3       | 0.007254 | -2.33515  |  |
| 18418 | Neoplasm | PPP1R12C     | 0        | -2.334646 |  |
| 18419 | Neoplasm | TRPM4        | 0.000006 | -2.333557 |  |
| 18420 | Neoplasm | CCBL1        | 0.008162 | -2.329147 |  |
| 18421 | Neoplasm | KIAA1274     | 0.004043 | -2.327109 |  |
| 18422 | Neoplasm | LOC100509231 | 0.008704 | -2.326008 |  |
| 18423 | Neoplasm | ARRDC4       | 0        | -2.325857 |  |
| 18424 | Neoplasm | SCRN2        | 0.003139 | -2.325757 |  |
| 18425 | Neoplasm | ADARB1       | 0.003201 | -2.32474  |  |
| 18426 | Neoplasm | CAPN5        | 0        | -2.323863 |  |
| 18427 | Neoplasm | C9ORF19      | 0.000083 | -2.320293 |  |
| 18428 | Neoplasm | BTN2A2       | 0.004519 | -2.318143 |  |
| 18429 | Neoplasm | RASSF6       | 0        | -2.317665 |  |
| 18430 | Neoplasm | TNRC6C       | 0.000079 | -2.315086 |  |
| 18431 | Neoplasm | AMOTL2       | 0.000971 | -2.313122 |  |
| 18432 | Neoplasm | RILP         | 0        | -2.310785 |  |
| 18433 | Neoplasm | RBM24        | 0        | -2.307876 |  |
| 18434 | Neoplasm | EHD4         | 0.003433 | -2.301779 |  |
| 18435 | Neoplasm | SSR1         | 0.006177 | -2.300646 |  |
| 18436 | Neoplasm | MCPH1        | 0.015285 | -2.300264 |  |
| 18437 | Neoplasm | FASTKD1      | 0.020529 | -2.298061 |  |
| 18438 | Neoplasm | SH3BGRL2     | 0.000004 | -2.297834 |  |
| 18439 | Neoplasm | SFRP4        | 0        | -2.294594 |  |
| 18440 | Neoplasm | SCUBE2       | 0        | -2.293887 |  |
| 18441 | Neoplasm | IL6ST        | 0.00012  | -2.293095 |  |
| 18442 | Neoplasm | ATP2A1       | 0.00455  | -2.290934 |  |
| 18443 | Neoplasm | TMEM35       | 0        | -2.29044  |  |
| 18444 | Neoplasm | CCDC45       | 0.001144 | -2.289958 |  |
| 18445 | Neoplasm | PLCD1        | 0        | -2.282423 |  |
| 18446 | Neoplasm | FBXW2        | 0.015016 | -2.280679 |  |
| 18447 | Neoplasm | HIST1H4C     | 0.001424 | -2.279835 |  |
| 18448 | Neoplasm | FLJ14981     | 0.000001 | -2.278628 |  |

|       |          |           |          |           |  |
|-------|----------|-----------|----------|-----------|--|
| 18449 | Neoplasm | M6PRBP1   | 0.00455  | -2.274876 |  |
| 18450 | Neoplasm | ADORA2A   | 0.015404 | -2.274787 |  |
| 18451 | Neoplasm | LOC150759 | 0.026447 | -2.274319 |  |
| 18452 | Neoplasm | TNFSF9    | 0.001682 | -2.272151 |  |
| 18453 | Neoplasm | MEF2C     | 0        | -2.269451 |  |
| 18454 | Neoplasm | AES       | 0        | -2.268848 |  |
| 18455 | Neoplasm | TCF21     | 0        | -2.263516 |  |
| 18456 | Neoplasm | TBC1D8    | 0.001763 | -2.260635 |  |
| 18457 | Neoplasm | GPD2      | 0.003773 | -2.259928 |  |
| 18458 | Neoplasm | FRYL      | 0        | -2.255563 |  |
| 18459 | Neoplasm | EIF4E3    | 0        | -2.254867 |  |
| 18460 | Neoplasm | HSD17B1   | 0.006954 | -2.249908 |  |
| 18461 | Neoplasm | IFNAR2    | 0.00381  | -2.247319 |  |
| 18462 | Neoplasm | RHOB      | 0.000018 | -2.246938 |  |
| 18463 | Neoplasm | RCBTB2    | 0.033618 | -2.244056 |  |
| 18464 | Neoplasm | RHOBTB3   | 0.011324 | -2.24344  |  |
| 18465 | Neoplasm | C21orf2   | 0.000152 | -2.243289 |  |
| 18466 | Neoplasm | MYO10     | 0.007777 | -2.238264 |  |
| 18467 | Neoplasm | DMXL1     | 0        | -2.23329  |  |
| 18468 | Neoplasm | NEK1      | 0.005663 | -2.232097 |  |
| 18469 | Neoplasm | CAS1      | 0        | -2.229294 |  |
| 18470 | Neoplasm | C21orf49  | 0.0238   | -2.228355 |  |
| 18471 | Neoplasm | SNRPA1    | 0.003398 | -2.224707 |  |
| 18472 | Neoplasm | ENTPD3    | 0        | -2.224412 |  |
| 18473 | Neoplasm | SLC1A7    | 0.000001 | -2.224365 |  |
| 18474 | Neoplasm | ST7L      | 0        | -2.223282 |  |
| 18475 | Neoplasm | ULK4      | 0.009941 | -2.221932 |  |
| 18476 | Neoplasm | JUP       | 0.002556 | -2.220965 |  |
| 18477 | Neoplasm | SLC25A34  | 0.000033 | -2.218708 |  |
| 18478 | Neoplasm | FAIM      | 0.03611  | -2.217805 |  |
| 18479 | Neoplasm | ALDH7A1   | 0.014981 | -2.215403 |  |
| 18480 | Neoplasm | PLAC2     | 0.021845 | -2.210621 |  |
| 18481 | Neoplasm | EDG2      | 0.000005 | -2.207748 |  |
| 18482 | Neoplasm | RAP2B     | 0.000143 | -2.205439 |  |
| 18483 | Neoplasm | CRNKL1    | 0.003882 | -2.205356 |  |
| 18484 | Neoplasm | BHLHB3    | 0        | -2.202249 |  |
| 18485 | Neoplasm | LOC285016 | 0        | -2.201143 |  |
| 18486 | Neoplasm | INTS2     | 0.000039 | -2.200614 |  |
| 18487 | Neoplasm | EYA4      | 0.008495 | -2.196879 |  |
| 18488 | Neoplasm | MYLK      | 0.009119 | -2.196158 |  |
| 18489 | Neoplasm | SH2B3     | 0.00632  | -2.193403 |  |
| 18490 | Neoplasm | GALIG     | 0        | -2.192145 |  |
| 18491 | Neoplasm | SBDS      | 0.002176 | -2.191661 |  |
| 18492 | Neoplasm | PSPH      | 0.031932 | -2.189757 |  |
| 18493 | Neoplasm | IL17RD    | 0.002557 | -2.189348 |  |
| 18494 | Neoplasm | FAM36A    | 0.003976 | -2.188178 |  |
| 18495 | Neoplasm | MAL       | 0        | -2.184336 |  |
| 18496 | Neoplasm | GNAQ      | 0.000004 | -2.183832 |  |
| 18497 | Neoplasm | ABHD8     | 0.019682 | -2.183225 |  |
| 18498 | Neoplasm | TCP11L1   | 0.00036  | -2.182346 |  |

|       |          |           |          |           |  |
|-------|----------|-----------|----------|-----------|--|
| 18499 | Neoplasm | MACF1     | 0.012878 | -2.181325 |  |
| 18500 | Neoplasm | MSI1      | 0.036913 | -2.178791 |  |
| 18501 | Neoplasm | ERCC6     | 0.002672 | -2.177854 |  |
| 18502 | Neoplasm | ALDH5A1   | 0.006378 | -2.177339 |  |
| 18503 | Neoplasm | EPB41L5   | 0.002728 | -2.1762   |  |
| 18504 | Neoplasm | MRLC2     | 0        | -2.176183 |  |
| 18505 | Neoplasm | GSTM2     | 0.000115 | -2.175818 |  |
| 18506 | Neoplasm | MXD1      | 0.002178 | -2.174424 |  |
| 18507 | Neoplasm | CARS2     | 0.000888 | -2.173453 |  |
| 18508 | Neoplasm | ARHGAP20  | 0        | -2.170826 |  |
| 18509 | Neoplasm | PTPN21    | 0        | -2.169707 |  |
| 18510 | Neoplasm | HUS1      | 0.009117 | -2.169651 |  |
| 18511 | Neoplasm | LARP4     | 0.009225 | -2.169576 |  |
| 18512 | Neoplasm | ORF1-FL49 | 0.000001 | -2.166765 |  |
| 18513 | Neoplasm | CNNM2     | 0        | -2.1622   |  |
| 18514 | Neoplasm | GPD1L     | 0.000012 | -2.159267 |  |
| 18515 | Neoplasm | PTK6      | 0.000009 | -2.155801 |  |
| 18516 | Neoplasm | FNIP2     | 0        | -2.155429 |  |
| 18517 | Neoplasm | CPEB3     | 0        | -2.153786 |  |
| 18518 | Neoplasm | KIAA1598  | 0.010833 | -2.153431 |  |
| 18519 | Neoplasm | MOSPD1    | 0.003914 | -2.151393 |  |
| 18520 | Neoplasm | HSPA4     | 0.000878 | -2.150924 |  |
| 18521 | Neoplasm | NME7      | 0.000037 | -2.150461 |  |
| 18522 | Neoplasm | MAL2      | 0.003554 | -2.149676 |  |
| 18523 | Neoplasm | BLMH      | 0.002902 | -2.146388 |  |
| 18524 | Neoplasm | CAMK2N1   | 0.000957 | -2.143111 |  |
| 18525 | Neoplasm | PRRT1     | 0.027768 | -2.143055 |  |
| 18526 | Neoplasm | GPR30     | 0.000043 | -2.142041 |  |
| 18527 | Neoplasm | HOXC6     | 0.000644 | -2.138978 |  |
| 18528 | Neoplasm | C21orf57  | 0.020347 | -2.135568 |  |
| 18529 | Neoplasm | HMGB3     | 0.014104 | -2.131491 |  |
| 18530 | Neoplasm | PSMB7     | 0.000971 | -2.130678 |  |
| 18531 | Neoplasm | ZNF219    | 0        | -2.12931  |  |
| 18532 | Neoplasm | PHF6      | 0        | -2.128406 |  |
| 18533 | Neoplasm | FNDC3A    | 0.005161 | -2.128188 |  |
| 18534 | Neoplasm | ATP6V1C1  | 0.002176 | -2.128012 |  |
| 18535 | Neoplasm | MAGED2    | 0.000967 | -2.127688 |  |
| 18536 | Neoplasm | RIOK1     | 0.001923 | -2.127121 |  |
| 18537 | Neoplasm | IQSEC1    | 0.002899 | -2.12707  |  |
| 18538 | Neoplasm | TTC7B     | 0.006621 | -2.125402 |  |
| 18539 | Neoplasm | CALM1     | 0        | -2.124523 |  |
| 18540 | Neoplasm | APOBEC3C  | 0.001266 | -2.124361 |  |
| 18541 | Neoplasm | F2RL1     | 0.001934 | -2.122474 |  |
| 18542 | Neoplasm | PINK1     | 0        | -2.117277 |  |
| 18543 | Neoplasm | FANCB     | 0.01232  | -2.116075 |  |
| 18544 | Neoplasm | OSBPL1A   | 0.000001 | -2.114528 |  |
| 18545 | Neoplasm | BLVRA     | 0.001896 | -2.112777 |  |
| 18546 | Neoplasm | ZCCHC10   | 0.001102 | -2.112274 |  |
| 18547 | Neoplasm | GLRX3     | 0.001601 | -2.111907 |  |
| 18548 | Neoplasm | WDR79     | 0.036355 | -2.111652 |  |

|       |          |              |          |           |  |
|-------|----------|--------------|----------|-----------|--|
| 18549 | Neoplasm | LOC653391    | 0.011795 | -2.111207 |  |
| 18550 | Neoplasm | LOC285535    | 0        | -2.111181 |  |
| 18551 | Neoplasm | KRT18        | 0.000444 | -2.109715 |  |
| 18552 | Neoplasm | CHP          | 0.000003 | -2.107398 |  |
| 18553 | Neoplasm | MGC14376     | 0.000209 | -2.105584 |  |
| 18554 | Neoplasm | LOC81691     | 0.004976 | -2.103122 |  |
| 18555 | Neoplasm | GBP2         | 0.000284 | -2.102945 |  |
| 18556 | Neoplasm | KIAA1737     | 0        | -2.102382 |  |
| 18557 | Neoplasm | SPPL2A       | 0        | -2.102164 |  |
| 18558 | Neoplasm | C9orf45      | 0.0131   | -2.102002 |  |
| 18559 | Neoplasm | ShrmL        | 0.00001  | -2.101674 |  |
| 18560 | Neoplasm | ARL5B        | 0.001361 | -2.101628 |  |
| 18561 | Neoplasm | TCEB1        | 0.004051 | -2.099726 |  |
| 18562 | Neoplasm | JUN          | 0        | -2.099439 |  |
| 18563 | Neoplasm | MARVELD3     | 0        | -2.098484 |  |
| 18564 | Neoplasm | FAS          | 0        | -2.09611  |  |
| 18565 | Neoplasm | FLJ12610     | 0.000009 | -2.095074 |  |
| 18566 | Neoplasm | ZNF362       | 0.009242 | -2.094542 |  |
| 18567 | Neoplasm | USP36        | 0.005902 | -2.093428 |  |
| 18568 | Neoplasm | CRY2         | 0        | -2.091582 |  |
| 18569 | Neoplasm | NXT2         | 0.009712 | -2.091424 |  |
| 18570 | Neoplasm | POLA1        | 0.000257 | -2.091156 |  |
| 18571 | Neoplasm | ACOT7        | 0.012699 | -2.089218 |  |
| 18572 | Neoplasm | PTS          | 0.001084 | -2.087676 |  |
| 18573 | Neoplasm | SERTAD1      | 0.002438 | -2.087445 |  |
| 18574 | Neoplasm | CDC42SE2     | 0        | -2.085814 |  |
| 18575 | Neoplasm | TOM1L2       | 0        | -2.085025 |  |
| 18576 | Neoplasm | DNAL1        | 0.004103 | -2.084179 |  |
| 18577 | Neoplasm | ILF3         | 0.001714 | -2.083165 |  |
| 18578 | Neoplasm | VAMP8        | 0.000007 | -2.083103 |  |
| 18579 | Neoplasm | TRPV1        | 0.015171 | -2.082321 |  |
| 18580 | Neoplasm | LOC100129113 | 0.040603 | -2.082276 |  |
| 18581 | Neoplasm | LOC642826    | 0.006082 | -2.078366 |  |
| 18582 | Neoplasm | PSMB3        | 0.000456 | -2.077504 |  |
| 18583 | Neoplasm | C10orf47     | 0.001521 | -2.076716 |  |
| 18584 | Neoplasm | PFAS         | 0.006474 | -2.075764 |  |
| 18585 | Neoplasm | BMP2K        | 0        | -2.075154 |  |
| 18586 | Neoplasm | ATP6V1E1     | 0.002694 | -2.074947 |  |
| 18587 | Neoplasm | MYO1C        | 0        | -2.074156 |  |
| 18588 | Neoplasm | MRPS10       | 0.002949 | -2.072435 |  |
| 18589 | Neoplasm | CENPC1       | 0.002892 | -2.071658 |  |
| 18590 | Neoplasm | CCL14-CCL15  | 0        | -2.070167 |  |
| 18591 | Neoplasm | SLC22A18AS   | 0        | -2.068933 |  |
| 18592 | Neoplasm | PLXNA2       | 0.000002 | -2.068311 |  |
| 18593 | Neoplasm | MAP1LC3B     | 0.003955 | -2.067947 |  |
| 18594 | Neoplasm | MALT1        | 0.005468 | -2.06701  |  |
| 18595 | Neoplasm | SLC25A25     | 0.003091 | -2.066605 |  |
| 18596 | Neoplasm | ATM          | 0.006159 | -2.063517 |  |
| 18597 | Neoplasm | TTC5         | 0.008495 | -2.063407 |  |
| 18598 | Neoplasm | CARM1        | 0.010012 | -2.060209 |  |

|       |          |           |          |           |  |
|-------|----------|-----------|----------|-----------|--|
| 18599 | Neoplasm | TDRD10    | 0        | -2.058953 |  |
| 18600 | Neoplasm | RIOK2     | 0.011041 | -2.05801  |  |
| 18601 | Neoplasm | TMEM67    | 0.001515 | -2.056877 |  |
| 18602 | Neoplasm | SQRDL     | 0.000007 | -2.056851 |  |
| 18603 | Neoplasm | INPP5A    | 0        | -2.056516 |  |
| 18604 | Neoplasm | ARRB1     | 0.012011 | -2.055017 |  |
| 18605 | Neoplasm | NKX2-3    | 0        | -2.052668 |  |
| 18606 | Neoplasm | PRDM11    | 0.003139 | -2.052501 |  |
| 18607 | Neoplasm | GDPD2     | 0.000372 | -2.052014 |  |
| 18608 | Neoplasm | HIST1H4B  | 0.026406 | -2.047212 |  |
| 18609 | Neoplasm | LARGE     | 0        | -2.046539 |  |
| 18610 | Neoplasm | HN1       | 0.003798 | -2.046453 |  |
| 18611 | Neoplasm | LOC729852 | 0.014188 | -2.04438  |  |
| 18612 | Neoplasm | FLJ41603  | 0        | -2.04177  |  |
| 18613 | Neoplasm | CD58      | 0.002825 | -2.041293 |  |
| 18614 | Neoplasm | EPB41L3   | 0        | -2.03821  |  |
| 18615 | Neoplasm | S100A10   | 0.000004 | -2.036907 |  |
| 18616 | Neoplasm | DUS3L     | 0.000036 | -2.036739 |  |
| 18617 | Neoplasm | SYTL4     | 0.000002 | -2.034218 |  |
| 18618 | Neoplasm | CLTB      | 0.000008 | -2.034168 |  |
| 18619 | Neoplasm | PCCA      | 0.002848 | -2.03407  |  |
| 18620 | Neoplasm | PAG1      | 0        | -2.033606 |  |
| 18621 | Neoplasm | SUPT4H1   | 0.002137 | -2.032625 |  |
| 18622 | Neoplasm | CADM3     | 0        | -2.031083 |  |
| 18623 | Neoplasm | GRHPR     | 0.009696 | -2.030113 |  |
| 18624 | Neoplasm | MAGI2     | 0        | -2.029715 |  |
| 18625 | Neoplasm | SNRPB2    | 0.021713 | -2.029005 |  |
| 18626 | Neoplasm | YJEFN3    | 0.00683  | -2.028748 |  |
| 18627 | Neoplasm | AGPAT5    | 0.006797 | -2.028322 |  |
| 18628 | Neoplasm | CPT2      | 0        | -2.027885 |  |
| 18629 | Neoplasm | ZNF101    | 0.008117 | -2.026637 |  |
| 18630 | Neoplasm | ACVR2B    | 0.011553 | -2.023435 |  |
| 18631 | Neoplasm | TSPAN3    | 0        | -2.021741 |  |
| 18632 | Neoplasm | STK17A    | 0.001462 | -2.021667 |  |
| 18633 | Neoplasm | MXI1      | 0        | -2.021021 |  |
| 18634 | Neoplasm | NRAS      | 0.003776 | -2.020621 |  |
| 18635 | Neoplasm | BCLAF1    | 0.00092  | -2.019804 |  |
| 18636 | Neoplasm | SVOP      | 0        | -2.017975 |  |
| 18637 | Neoplasm | HEATR6    | 0.001574 | -2.017191 |  |
| 18638 | Neoplasm | ZFAND5    | 0.000486 | -2.016045 |  |
| 18639 | Neoplasm | EFCAB7    | 0.003209 | -2.014921 |  |
| 18640 | Neoplasm | PMFBP1    | 0.004078 | -2.014917 |  |
| 18641 | Neoplasm | MRPS18C   | 0.002825 | -2.014221 |  |
| 18642 | Neoplasm | POLD4     | 0.000002 | -2.014145 |  |
| 18643 | Neoplasm | ACOT9     | 0.009912 | -2.01377  |  |
| 18644 | Neoplasm | FRG1B     | 0.012116 | -2.013501 |  |
| 18645 | Neoplasm | LTB4R     | 0.040194 | -2.012137 |  |
| 18646 | Neoplasm | STRADA    | 0.000227 | -2.011836 |  |
| 18647 | Neoplasm | DNAJA1    | 0.002609 | -2.009888 |  |
| 18648 | Neoplasm | REEP5     | 0.0025   | -2.009849 |  |



|       |          |           |          |           |  |
|-------|----------|-----------|----------|-----------|--|
| 18649 | Neoplasm | MSI2      | 0.013436 | -2.008565 |  |
| 18650 | Neoplasm | HERPUD1   | 0        | -2.008187 |  |
| 18651 | Neoplasm | PCSK1N    | 0.000002 | -2.008034 |  |
| 18652 | Neoplasm | KDEL3     | 0.005663 | -2.007188 |  |
| 18653 | Neoplasm | ARMCX5    | 0.004295 | -2.005073 |  |
| 18654 | Neoplasm | ANKRD57   | 0.002996 | -2.004823 |  |
| 18655 | Neoplasm | PSMF1     | 0.006577 | -2.0029   |  |
| 18656 | Neoplasm | HMP19     | 0        | -2.002601 |  |
| 18657 | Neoplasm | CTNND1    | 0.000001 | -2.001972 |  |
| 18658 | Neoplasm | COPG      | 0        | -1.774521 |  |
| 18659 | Neoplasm | LOC158257 | 0        | 1.8571    |  |
| 18660 | Neoplasm | ECSCR     | 0.002438 | 2.000173  |  |
| 18661 | Neoplasm | PRR16     | 0        | 2.000888  |  |
| 18662 | Neoplasm | CDT1      | 0.000228 | 2.001072  |  |
| 18663 | Neoplasm | TMEM166   | 0.000065 | 2.00184   |  |
| 18664 | Neoplasm | DACH      | 0.000215 | 2.00298   |  |
| 18665 | Neoplasm | IBSP      | 0        | 2.003274  |  |
| 18666 | Neoplasm | RUNX1     | 0.000036 | 2.004859  |  |
| 18667 | Neoplasm | CTSD      | 0.007351 | 2.0054    |  |
| 18668 | Neoplasm | COL5A1    | 0        | 2.00545   |  |
| 18669 | Neoplasm | LOC729088 | 0.002178 | 2.00553   |  |
| 18670 | Neoplasm | TG        | 0        | 2.006777  |  |
| 18671 | Neoplasm | HIBADH    | 0.000716 | 2.006852  |  |
| 18672 | Neoplasm | ZNF703    | 0        | 2.007057  |  |
| 18673 | Neoplasm | WDR51B    | 0        | 2.007203  |  |
| 18674 | Neoplasm | LONP1     | 0        | 2.008715  |  |
| 18675 | Neoplasm | CCT2      | 0.000355 | 2.00934   |  |
| 18676 | Neoplasm | MTA2      | 0.000001 | 2.010076  |  |
| 18677 | Neoplasm | MLKL      | 0.010752 | 2.013094  |  |
| 18678 | Neoplasm | LGALS8    | 0        | 2.013911  |  |
| 18679 | Neoplasm | PRPF6     | 0        | 2.014784  |  |
| 18680 | Neoplasm | C5orf46   | 0        | 2.015334  |  |
| 18681 | Neoplasm | MED30     | 0.00024  | 2.015358  |  |
| 18682 | Neoplasm | KIF15     | 0        | 2.015372  |  |
| 18683 | Neoplasm | GOLT1B    | 0        | 2.015554  |  |
| 18684 | Neoplasm | CDC123    | 0        | 2.016474  |  |
| 18685 | Neoplasm | SH3BGRL3  | 0.017778 | 2.016755  |  |
| 18686 | Neoplasm | PYCR1     | 0.000055 | 2.016871  |  |
| 18687 | Neoplasm | NCOA7     | 0.000121 | 2.017206  |  |
| 18688 | Neoplasm | LOC642869 | 0.000007 | 2.017381  |  |
| 18689 | Neoplasm | HDAC2     | 0.000892 | 2.017489  |  |
| 18690 | Neoplasm | MTERFD1   | 0.000001 | 2.018794  |  |
| 18691 | Neoplasm | KIAA1912  | 0        | 2.020831  |  |
| 18692 | Neoplasm | GRAMD1A   | 0        | 2.022655  |  |
| 18693 | Neoplasm | KIF11     | 0.000001 | 2.025286  |  |
| 18694 | Neoplasm | IRF6      | 0.005045 | 2.025898  |  |
| 18695 | Neoplasm | BCL10     | 0.039875 | 2.027342  |  |
| 18696 | Neoplasm | NUP107    | 0        | 2.028406  |  |
| 18697 | Neoplasm | CCDC59    | 0        | 2.030633  |  |
| 18698 | Neoplasm | PDZK1P1   | 0.002728 | 2.031559  |  |

|       |          |           |          |          |  |
|-------|----------|-----------|----------|----------|--|
| 18699 | Neoplasm | ANTXR1    | 0        | 2.033572 |  |
| 18700 | Neoplasm | LOXL2     | 0        | 2.033579 |  |
| 18701 | Neoplasm | FOXO1A    | 0        | 2.034916 |  |
| 18702 | Neoplasm | STAT6     | 0.00843  | 2.036991 |  |
| 18703 | Neoplasm | SSX1      | 0        | 2.037624 |  |
| 18704 | Neoplasm | G0S2      | 0.000527 | 2.038066 |  |
| 18705 | Neoplasm | KLHL35    | 0.006167 | 2.038212 |  |
| 18706 | Neoplasm | NME1-NME2 | 0.000103 | 2.03843  |  |
| 18707 | Neoplasm | SHE       | 0.001063 | 2.039587 |  |
| 18708 | Neoplasm | DKK4      | 0        | 2.040699 |  |
| 18709 | Neoplasm | SMOX      | 0.000001 | 2.041865 |  |
| 18710 | Neoplasm | SET       | 0        | 2.042096 |  |
| 18711 | Neoplasm | SDC2      | 0.003406 | 2.042346 |  |
| 18712 | Neoplasm | DLG1      | 0.000784 | 2.048059 |  |
| 18713 | Neoplasm | DCUN1D4   | 0.002398 | 2.048193 |  |
| 18714 | Neoplasm | SPOCK1    | 0        | 2.049475 |  |
| 18715 | Neoplasm | TIMELESS  | 0        | 2.051896 |  |
| 18716 | Neoplasm | NOV       | 0.014665 | 2.054291 |  |
| 18717 | Neoplasm | SQLE      | 0.008905 | 2.058426 |  |
| 18718 | Neoplasm | CDH24     | 0        | 2.058912 |  |
| 18719 | Neoplasm | DPH2      | 0.000054 | 2.059234 |  |
| 18720 | Neoplasm | C7orf30   | 0.001055 | 2.059312 |  |
| 18721 | Neoplasm | CCDC52    | 0.019682 | 2.059836 |  |
| 18722 | Neoplasm | RCAN3     | 0.033618 | 2.061511 |  |
| 18723 | Neoplasm | C7orf36   | 0        | 2.064753 |  |
| 18724 | Neoplasm | OIP5      | 0.000001 | 2.065998 |  |
| 18725 | Neoplasm | GP9       | 0.000021 | 2.066583 |  |
| 18726 | Neoplasm | PITPNM3   | 0.001321 | 2.068913 |  |
| 18727 | Neoplasm | RHBDF2    | 0        | 2.069633 |  |
| 18728 | Neoplasm | ZDHHC6    | 0        | 2.070848 |  |
| 18729 | Neoplasm | SNAP25    | 0.000994 | 2.072246 |  |
| 18730 | Neoplasm | MGAM      | 0.015147 | 2.072616 |  |
| 18731 | Neoplasm | OSBPL3    | 0        | 2.072849 |  |
| 18732 | Neoplasm | NUP205    | 0.000001 | 2.074642 |  |
| 18733 | Neoplasm | SEMA4B    | 0.011658 | 2.074967 |  |
| 18734 | Neoplasm | BMS1      | 0.000648 | 2.07506  |  |
| 18735 | Neoplasm | FA2H      | 0.002111 | 2.075208 |  |
| 18736 | Neoplasm | GAPDH     | 0.000008 | 2.076062 |  |
| 18737 | Neoplasm | STT3A     | 0        | 2.077468 |  |
| 18738 | Neoplasm | ENO1      | 0.000002 | 2.078688 |  |
| 18739 | Neoplasm | EIF2C2    | 0.000983 | 2.081042 |  |
| 18740 | Neoplasm | PRKCI     | 0.024617 | 2.082491 |  |
| 18741 | Neoplasm | PSMB9     | 0.015099 | 2.083567 |  |
| 18742 | Neoplasm | C11orf71  | 0.003975 | 2.084208 |  |
| 18743 | Neoplasm | PPRC1     | 0.000565 | 2.084755 |  |
| 18744 | Neoplasm | MB        | 0.000079 | 2.084983 |  |
| 18745 | Neoplasm | TEX10     | 0.000091 | 2.089342 |  |
| 18746 | Neoplasm | DTX4      | 0.01187  | 2.089791 |  |
| 18747 | Neoplasm | C14orf118 | 0.002224 | 2.090132 |  |
| 18748 | Neoplasm | FOSL2     | 0.005768 | 2.090826 |  |

|       |          |           |          |          |  |
|-------|----------|-----------|----------|----------|--|
| 18749 | Neoplasm | KIAA0907  | 0.000141 | 2.092142 |  |
| 18750 | Neoplasm | THY1      | 0        | 2.09267  |  |
| 18751 | Neoplasm | RFC5      | 0.000001 | 2.096438 |  |
| 18752 | Neoplasm | ANKRD28   | 0.003161 | 2.097112 |  |
| 18753 | Neoplasm | KAT2A     | 0        | 2.099237 |  |
| 18754 | Neoplasm | GPR161    | 0.003151 | 2.099688 |  |
| 18755 | Neoplasm | TUBA4A    | 0.000277 | 2.100791 |  |
| 18756 | Neoplasm | CLEC5A    | 0        | 2.101128 |  |
| 18757 | Neoplasm | EFNA5     | 0.00968  | 2.101146 |  |
| 18758 | Neoplasm | EPPK1     | 0.000001 | 2.101393 |  |
| 18759 | Neoplasm | C1orf116  | 0        | 2.101424 |  |
| 18760 | Neoplasm | FLJ10826  | 0.000009 | 2.102346 |  |
| 18761 | Neoplasm | GSTO1     | 0.000868 | 2.103585 |  |
| 18762 | Neoplasm | GSPT1     | 0.002224 | 2.104227 |  |
| 18763 | Neoplasm | TP53I11   | 0.006536 | 2.104362 |  |
| 18764 | Neoplasm | XPO1      | 0.001601 | 2.107384 |  |
| 18765 | Neoplasm | SFTA2     | 0        | 2.108096 |  |
| 18766 | Neoplasm | SNRPE     | 0.000957 | 2.108572 |  |
| 18767 | Neoplasm | DCP1A     | 0.005453 | 2.108943 |  |
| 18768 | Neoplasm | SLC25A32  | 0.000001 | 2.113102 |  |
| 18769 | Neoplasm | KIAA1522  | 0.002098 | 2.114419 |  |
| 18770 | Neoplasm | GINS2     | 0.000001 | 2.11675  |  |
| 18771 | Neoplasm | NUP85     | 0.000001 | 2.11777  |  |
| 18772 | Neoplasm | INTS12    | 0.007343 | 2.117921 |  |
| 18773 | Neoplasm | RBM28     | 0        | 2.120363 |  |
| 18774 | Neoplasm | LOC727869 | 0.015721 | 2.121104 |  |
| 18775 | Neoplasm | SFRS15    | 0.002521 | 2.121254 |  |
| 18776 | Neoplasm | MTHFD1    | 0.000106 | 2.122304 |  |
| 18777 | Neoplasm | COL7A1    | 0        | 2.12324  |  |
| 18778 | Neoplasm | NCAPG2    | 0        | 2.125408 |  |
| 18779 | Neoplasm | CPEB2     | 0.010242 | 2.12979  |  |
| 18780 | Neoplasm | TNIP1     | 0.007915 | 2.130822 |  |
| 18781 | Neoplasm | FANCL     | 0        | 2.139324 |  |
| 18782 | Neoplasm | FLNB      | 0.000002 | 2.142236 |  |
| 18783 | Neoplasm | RDH13     | 0.001311 | 2.142516 |  |
| 18784 | Neoplasm | PRKACB    | 0.002696 | 2.143077 |  |
| 18785 | Neoplasm | C6orf118  | 0        | 2.143404 |  |
| 18786 | Neoplasm | RPL28     | 0.000284 | 2.146094 |  |
| 18787 | Neoplasm | CBX2      | 0.000054 | 2.149236 |  |
| 18788 | Neoplasm | PAQR4     | 0        | 2.151409 |  |
| 18789 | Neoplasm | OAS3      | 0.000001 | 2.155018 |  |
| 18790 | Neoplasm | FANCG     | 0        | 2.166676 |  |
| 18791 | Neoplasm | C1orf75   | 0        | 2.166889 |  |
| 18792 | Neoplasm | CKAP5     | 0.000231 | 2.168001 |  |
| 18793 | Neoplasm | IL24      | 0        | 2.168089 |  |
| 18794 | Neoplasm | SHISA5    | 0.012794 | 2.168146 |  |
| 18795 | Neoplasm | PTK2      | 0.000052 | 2.169503 |  |
| 18796 | Neoplasm | SLC25A24  | 0.010859 | 2.170225 |  |
| 18797 | Neoplasm | CCNU      | 0.000048 | 2.172188 |  |
| 18798 | Neoplasm | CCL4      | 0        | 2.174968 |  |

|       |          |              |          |          |  |
|-------|----------|--------------|----------|----------|--|
| 18799 | Neoplasm | NBEAL2       | 0.000678 | 2.177044 |  |
| 18800 | Neoplasm | LOC644242    | 0.001622 | 2.179539 |  |
| 18801 | Neoplasm | PLS3         | 0        | 2.181015 |  |
| 18802 | Neoplasm | SERPINH1     | 0        | 2.184798 |  |
| 18803 | Neoplasm | VPS8         | 0.000456 | 2.185653 |  |
| 18804 | Neoplasm | ZNF259       | 0.000263 | 2.187872 |  |
| 18805 | Neoplasm | RAB15        | 0        | 2.188293 |  |
| 18806 | Neoplasm | JAG2         | 0.000001 | 2.191192 |  |
| 18807 | Neoplasm | LPGAT1       | 0.000214 | 2.192642 |  |
| 18808 | Neoplasm | WDR43        | 0.000001 | 2.194866 |  |
| 18809 | Neoplasm | PLSCR4       | 0.000705 | 2.195004 |  |
| 18810 | Neoplasm | CD1A         | 0        | 2.195462 |  |
| 18811 | Neoplasm | CCND2        | 0.000586 | 2.19821  |  |
| 18812 | Neoplasm | CTSC         | 0.043208 | 2.198758 |  |
| 18813 | Neoplasm | ACSS1        | 0.034762 | 2.200019 |  |
| 18814 | Neoplasm | HM13         | 0        | 2.200948 |  |
| 18815 | Neoplasm | NOL6         | 0        | 2.200948 |  |
| 18816 | Neoplasm | SLC7A1       | 0        | 2.204228 |  |
| 18817 | Neoplasm | PTPRK        | 0.002737 | 2.208975 |  |
| 18818 | Neoplasm | A4GALT       | 0.002329 | 2.214058 |  |
| 18819 | Neoplasm | ALG5         | 0        | 2.216436 |  |
| 18820 | Neoplasm | C13orf18     | 0        | 2.218657 |  |
| 18821 | Neoplasm | REV3L        | 0.003783 | 2.22224  |  |
| 18822 | Neoplasm | SETD4        | 0.003586 | 2.225888 |  |
| 18823 | Neoplasm | TMBIM1       | 0.026406 | 2.230122 |  |
| 18824 | Neoplasm | FLJ31306     | 0.003702 | 2.233375 |  |
| 18825 | Neoplasm | CHD9         | 0.003944 | 2.242315 |  |
| 18826 | Neoplasm | LOC728264    | 0.00086  | 2.24295  |  |
| 18827 | Neoplasm | LTA          | 0.000018 | 2.24405  |  |
| 18828 | Neoplasm | WDR33        | 0.002694 | 2.247316 |  |
| 18829 | Neoplasm | POLR1D       | 0.000001 | 2.252838 |  |
| 18830 | Neoplasm | CTSK         | 0        | 2.261573 |  |
| 18831 | Neoplasm | NUP37        | 0.000001 | 2.262069 |  |
| 18832 | Neoplasm | NUDCD1       | 0        | 2.265265 |  |
| 18833 | Neoplasm | LOC100507376 | 0.001901 | 2.266706 |  |
| 18834 | Neoplasm | ID4          | 0.0035   | 2.267087 |  |
| 18835 | Neoplasm | FUT8         | 0        | 2.267452 |  |
| 18836 | Neoplasm | PITX1        | 0.000001 | 2.26755  |  |
| 18837 | Neoplasm | LOC153546    | 0.000905 | 2.273416 |  |
| 18838 | Neoplasm | SH3PXD2A     | 0.001214 | 2.275325 |  |
| 18839 | Neoplasm | LCOR         | 0.035536 | 2.276058 |  |
| 18840 | Neoplasm | RBBP5        | 0.000265 | 2.277786 |  |
| 18841 | Neoplasm | CAPN10       | 0.002776 | 2.281419 |  |
| 18842 | Neoplasm | BCKDHB       | 0.033618 | 2.281949 |  |
| 18843 | Neoplasm | DIAPH1       | 0.000277 | 2.289976 |  |
| 18844 | Neoplasm | TM4SF18      | 0.000088 | 2.291425 |  |
| 18845 | Neoplasm | NF1          | 0.000456 | 2.294154 |  |
| 18846 | Neoplasm | EPHA1        | 0.007652 | 2.294364 |  |
| 18847 | Neoplasm | KIF20A       | 0        | 2.295043 |  |
| 18848 | Neoplasm | TNFRSF10A    | 0        | 2.304169 |  |

|       |          |              |          |          |  |
|-------|----------|--------------|----------|----------|--|
| 18849 | Neoplasm | DDIT4        | 0.000008 | 2.30636  |  |
| 18850 | Neoplasm | GGCT         | 0        | 2.307429 |  |
| 18851 | Neoplasm | MPZL1        | 0.000971 | 2.309346 |  |
| 18852 | Neoplasm | UBD          | 0        | 2.311269 |  |
| 18853 | Neoplasm | ARL8A        | 0        | 2.312248 |  |
| 18854 | Neoplasm | NPAS2        | 0.000307 | 2.31264  |  |
| 18855 | Neoplasm | ADAM12       | 0        | 2.314582 |  |
| 18856 | Neoplasm | SLC41A2      | 0.009376 | 2.321086 |  |
| 18857 | Neoplasm | IGHG1        | 0        | 2.321187 |  |
| 18858 | Neoplasm | C20orf42     | 0        | 2.321584 |  |
| 18859 | Neoplasm | CMTM8        | 0        | 2.325083 |  |
| 18860 | Neoplasm | GTF2IRD2     | 0.026368 | 2.328707 |  |
| 18861 | Neoplasm | HS2ST1       | 0.000002 | 2.328743 |  |
| 18862 | Neoplasm | LOC100133056 | 0        | 2.328852 |  |
| 18863 | Neoplasm | SNRPF        | 0.000586 | 2.337388 |  |
| 18864 | Neoplasm | CDC42EP1     | 0.000001 | 2.339437 |  |
| 18865 | Neoplasm | LOC595101    | 0.003321 | 2.349853 |  |
| 18866 | Neoplasm | RACGAP1      | 0.000285 | 2.352492 |  |
| 18867 | Neoplasm | ENPEP        | 0        | 2.363024 |  |
| 18868 | Neoplasm | CDH11        | 0        | 2.363087 |  |
| 18869 | Neoplasm | WNT5A        | 0        | 2.363404 |  |
| 18870 | Neoplasm | COL5A2       | 0        | 2.3652   |  |
| 18871 | Neoplasm | LOC285636    | 0.00022  | 2.367596 |  |
| 18872 | Neoplasm | MMP14        | 0        | 2.369605 |  |
| 18873 | Neoplasm | MADH3        | 0.000016 | 2.371723 |  |
| 18874 | Neoplasm | CCND1        | 0.000167 | 2.37227  |  |
| 18875 | Neoplasm | TH1L         | 0        | 2.374284 |  |
| 18876 | Neoplasm | ISL1         | 0.00781  | 2.387441 |  |
| 18877 | Neoplasm | SHC3         | 0.002224 | 2.389555 |  |
| 18878 | Neoplasm | MRPS17       | 0.000001 | 2.391333 |  |
| 18879 | Neoplasm | KIAA1257     | 0        | 2.392024 |  |
| 18880 | Neoplasm | ITGA6        | 0        | 2.395665 |  |
| 18881 | Neoplasm | LOC541469    | 0.002288 | 2.395799 |  |
| 18882 | Neoplasm | PTTG1        | 0.000355 | 2.399344 |  |
| 18883 | Neoplasm | GRIN2D       | 0        | 2.400151 |  |
| 18884 | Neoplasm | CASC4        | 0.000401 | 2.401116 |  |
| 18885 | Neoplasm | LOC100131564 | 0.000401 | 2.401604 |  |
| 18886 | Neoplasm | NOP56        | 0.000001 | 2.40229  |  |
| 18887 | Neoplasm | ZWILCH       | 0        | 2.403617 |  |
| 18888 | Neoplasm | ACER2        | 0.002288 | 2.405364 |  |
| 18889 | Neoplasm | hCG_1981531  | 0        | 2.40923  |  |
| 18890 | Neoplasm | ATP2C1       | 0.013657 | 2.409518 |  |
| 18891 | Neoplasm | MYB          | 0.001734 | 2.413454 |  |
| 18892 | Neoplasm | LOC729680    | 0.00039  | 2.414852 |  |
| 18893 | Neoplasm | E2F3         | 0.000284 | 2.418337 |  |
| 18894 | Neoplasm | GCA          | 0.001553 | 2.431306 |  |
| 18895 | Neoplasm | BCL2L12      | 0        | 2.434522 |  |
| 18896 | Neoplasm | PIK3C2A      | 0.002593 | 2.43464  |  |
| 18897 | Neoplasm | TWIST1       | 0        | 2.436027 |  |
| 18898 | Neoplasm | INSIG2       | 0.011477 | 2.436373 |  |

|       |          |           |          |          |  |
|-------|----------|-----------|----------|----------|--|
| 18899 | Neoplasm | DGAT2     | 0        | 2.437801 |  |
| 18900 | Neoplasm | AXL       | 0.003433 | 2.444911 |  |
| 18901 | Neoplasm | ZFP36     | 0.008906 | 2.452941 |  |
| 18902 | Neoplasm | FASN      | 0        | 2.454801 |  |
| 18903 | Neoplasm | LOC388564 | 0.003446 | 2.45847  |  |
| 18904 | Neoplasm | SERINC2   | 0.002    | 2.459978 |  |
| 18905 | Neoplasm | NOL8      | 0.000116 | 2.460398 |  |
| 18906 | Neoplasm | PDXK      | 0.000174 | 2.460748 |  |
| 18907 | Neoplasm | MARCKSL1  | 0.000038 | 2.462448 |  |
| 18908 | Neoplasm | FANCA     | 0.004036 | 2.463241 |  |
| 18909 | Neoplasm | DNAJB4    | 0.013657 | 2.464493 |  |
| 18910 | Neoplasm | C12orf11  | 0        | 2.477935 |  |
| 18911 | Neoplasm | ZNF529    | 0.003381 | 2.486826 |  |
| 18912 | Neoplasm | VAR5      | 0        | 2.490948 |  |
| 18913 | Neoplasm | TMEM158   | 0        | 2.496317 |  |
| 18914 | Neoplasm | ICAM1     | 0        | 2.498583 |  |
| 18915 | Neoplasm | C12orf48  | 0.000192 | 2.508405 |  |
| 18916 | Neoplasm | GYPC      | 0.000971 | 2.521104 |  |
| 18917 | Neoplasm | PKM2      | 0.000527 | 2.525776 |  |
| 18918 | Neoplasm | GNL3      | 0.000862 | 2.527467 |  |
| 18919 | Neoplasm | SERPINE2  | 0.00017  | 2.527904 |  |
| 18920 | Neoplasm | ATP5C1    | 0.002593 | 2.528303 |  |
| 18921 | Neoplasm | TAF1D     | 0.00002  | 2.528423 |  |
| 18922 | Neoplasm | RALGAPA2  | 0.003167 | 2.530418 |  |
| 18923 | Neoplasm | IARS      | 0.000066 | 2.534859 |  |
| 18924 | Neoplasm | ALPK3     | 0.011832 | 2.536828 |  |
| 18925 | Neoplasm | ITGA4     | 0.00231  | 2.538836 |  |
| 18926 | Neoplasm | GNE       | 0.031845 | 2.540196 |  |
| 18927 | Neoplasm | TRAIP     | 0        | 2.54541  |  |
| 18928 | Neoplasm | RPS27     | 0.001601 | 2.550802 |  |
| 18929 | Neoplasm | COL2A1    | 0        | 2.555688 |  |
| 18930 | Neoplasm | GPR56     | 0        | 2.556583 |  |
| 18931 | Neoplasm | FNDC3B    | 0.000829 | 2.559003 |  |
| 18932 | Neoplasm | TRUB1     | 0.000049 | 2.560965 |  |
| 18933 | Neoplasm | GPR34     | 0.000285 | 2.56189  |  |
| 18934 | Neoplasm | MCM7      | 0        | 2.562626 |  |
| 18935 | Neoplasm | OLA1      | 0.000115 | 2.567925 |  |
| 18936 | Neoplasm | UBE2L6    | 0.000001 | 2.570384 |  |
| 18937 | Neoplasm | SAMD13    | 0.003394 | 2.572244 |  |
| 18938 | Neoplasm | PSMG1     | 0.000001 | 2.572526 |  |
| 18939 | Neoplasm | CYP2U1    | 0.001452 | 2.573834 |  |
| 18940 | Neoplasm | CEP68     | 0.001734 | 2.584989 |  |
| 18941 | Neoplasm | CDC6      | 0        | 2.585624 |  |
| 18942 | Neoplasm | KLK7      | 0        | 2.5896   |  |
| 18943 | Neoplasm | SLC5A1    | 0.005513 | 2.592929 |  |
| 18944 | Neoplasm | CENPN     | 0        | 2.609111 |  |
| 18945 | Neoplasm | MYL6B     | 0        | 2.611333 |  |
| 18946 | Neoplasm | C2orf70   | 0        | 2.620584 |  |
| 18947 | Neoplasm | HIST3H2A  | 0.00005  | 2.620932 |  |
| 18948 | Neoplasm | MGC4308   | 0.000012 | 2.624252 |  |

|       |          |              |          |          |  |
|-------|----------|--------------|----------|----------|--|
| 18949 | Neoplasm | SMAD1        | 0.000456 | 2.624873 |  |
| 18950 | Neoplasm | SH3YL1       | 0.014111 | 2.626305 |  |
| 18951 | Neoplasm | LOC642103    | 0.001103 | 2.632824 |  |
| 18952 | Neoplasm | CHCHD6       | 0        | 2.643255 |  |
| 18953 | Neoplasm | GDF15        | 0.000083 | 2.644731 |  |
| 18954 | Neoplasm | SYCP3        | 0.003101 | 2.648587 |  |
| 18955 | Neoplasm | CCNA2        | 0.000001 | 2.6516   |  |
| 18956 | Neoplasm | C3orf31      | 0.000179 | 2.665299 |  |
| 18957 | Neoplasm | SKA3         | 0        | 2.687415 |  |
| 18958 | Neoplasm | BOP1         | 0        | 2.693284 |  |
| 18959 | Neoplasm | E2F5         | 0        | 2.697971 |  |
| 18960 | Neoplasm | GBP1         | 0        | 2.698104 |  |
| 18961 | Neoplasm | ZNF593       | 0.000689 | 2.699951 |  |
| 18962 | Neoplasm | METTL13      | 0.000434 | 2.712642 |  |
| 18963 | Neoplasm | C8orf83      | 0.003511 | 2.713181 |  |
| 18964 | Neoplasm | RALGAPA1     | 0.001977 | 2.714432 |  |
| 18965 | Neoplasm | KLK11        | 0.006314 | 2.714457 |  |
| 18966 | Neoplasm | CSMD1        | 0.002775 | 2.722372 |  |
| 18967 | Neoplasm | LRRC6        | 0        | 2.722628 |  |
| 18968 | Neoplasm | SPG20        | 0.001197 | 2.726715 |  |
| 18969 | Neoplasm | RAD54B       | 0.000645 | 2.728082 |  |
| 18970 | Neoplasm | CDK13        | 0.001661 | 2.733786 |  |
| 18971 | Neoplasm | PAFAH1B3     | 0        | 2.744808 |  |
| 18972 | Neoplasm | REPS1        | 0.0035   | 2.749114 |  |
| 18973 | Neoplasm | SULT1C2      | 0.000809 | 2.7538   |  |
| 18974 | Neoplasm | EIF5A        | 0        | 2.754041 |  |
| 18975 | Neoplasm | PLCB4        | 0        | 2.756105 |  |
| 18976 | Neoplasm | ADAP1        | 0.007915 | 2.777658 |  |
| 18977 | Neoplasm | PCDHA4       | 0.00532  | 2.815103 |  |
| 18978 | Neoplasm | NPC1         | 0.005291 | 2.816706 |  |
| 18979 | Neoplasm | QPCT         | 0.0001   | 2.81904  |  |
| 18980 | Neoplasm | MFAP2        | 0        | 2.834898 |  |
| 18981 | Neoplasm | PROX1        | 0        | 2.850013 |  |
| 18982 | Neoplasm | GNB1L        | 0        | 2.851117 |  |
| 18983 | Neoplasm | LGR5         | 0.000001 | 2.855969 |  |
| 18984 | Neoplasm | LMNB2        | 0        | 2.858719 |  |
| 18985 | Neoplasm | RAD23B       | 0.00064  | 2.859517 |  |
| 18986 | Neoplasm | SLC7A6       | 0        | 2.87069  |  |
| 18987 | Neoplasm | WISP1        | 0        | 2.875563 |  |
| 18988 | Neoplasm | NT5DC2       | 0        | 2.876001 |  |
| 18989 | Neoplasm | RSPO3        | 0.001791 | 2.880999 |  |
| 18990 | Neoplasm | LOC728153    | 0.003101 | 2.893528 |  |
| 18991 | Neoplasm | HNRNPL       | 0        | 2.905758 |  |
| 18992 | Neoplasm | LOC100287896 | 0.000107 | 2.912588 |  |
| 18993 | Neoplasm | ESPL1        | 0        | 2.913415 |  |
| 18994 | Neoplasm | CDK1         | 0.000371 | 2.916923 |  |
| 18995 | Neoplasm | TPD52L1      | 0.000259 | 2.917089 |  |
| 18996 | Neoplasm | CXCL6        | 0        | 2.921339 |  |
| 18997 | Neoplasm | NUDT1        | 0        | 2.924762 |  |
| 18998 | Neoplasm | FAM89A       | 0        | 2.927309 |  |

|       |          |              |          |          |  |
|-------|----------|--------------|----------|----------|--|
| 18999 | Neoplasm | CCT6A        | 0.000387 | 2.927714 |  |
| 19000 | Neoplasm | DTL          | 0.000149 | 2.931445 |  |
| 19001 | Neoplasm | SULF1        | 0        | 2.936796 |  |
| 19002 | Neoplasm | LACTB2       | 0.008833 | 2.941019 |  |
| 19003 | Neoplasm | CDKN2A       | 0.010583 | 2.944264 |  |
| 19004 | Neoplasm | ETS2         | 0        | 2.951832 |  |
| 19005 | Neoplasm | CYP4X1       | 0.000005 | 2.957464 |  |
| 19006 | Neoplasm | SNORA71A     | 0        | 2.960057 |  |
| 19007 | Neoplasm | RPGRIP1L     | 0        | 2.967761 |  |
| 19008 | Neoplasm | HEG1         | 0.003101 | 2.973493 |  |
| 19009 | Neoplasm | IL22RA1      | 0.007915 | 3.005191 |  |
| 19010 | Neoplasm | KCTD1        | 0.004402 | 3.007065 |  |
| 19011 | Neoplasm | TMEM159      | 0.013783 | 3.016472 |  |
| 19012 | Neoplasm | LOC100133920 | 0        | 3.017109 |  |
| 19013 | Neoplasm | NRARP        | 0.002776 | 3.021461 |  |
| 19014 | Neoplasm | NOP16        | 0.000752 | 3.023389 |  |
| 19015 | Neoplasm | RNF183       | 0        | 3.027376 |  |
| 19016 | Neoplasm | CTSE         | 0.005485 | 3.036036 |  |
| 19017 | Neoplasm | KIF4A        | 0.000001 | 3.052197 |  |
| 19018 | Neoplasm | NPIPL3       | 0.002977 | 3.055344 |  |
| 19019 | Neoplasm | ROM1         | 0.027768 | 3.058661 |  |
| 19020 | Neoplasm | SLC19A1      | 0        | 3.061448 |  |
| 19021 | Neoplasm | CTPS         | 0.000415 | 3.06325  |  |
| 19022 | Neoplasm | PLD1         | 0.011998 | 3.068428 |  |
| 19023 | Neoplasm | MGC48628     | 0.0067   | 3.068882 |  |
| 19024 | Neoplasm | GIN51        | 0        | 3.07162  |  |
| 19025 | Neoplasm | UTP14A       | 0.000259 | 3.072644 |  |
| 19026 | Neoplasm | FAM171B      | 0.003554 | 3.087231 |  |
| 19027 | Neoplasm | PTGFR        | 0.000456 | 3.090097 |  |
| 19028 | Neoplasm | TFF3         | 0        | 3.103154 |  |
| 19029 | Neoplasm | STAT1        | 0        | 3.107809 |  |
| 19030 | Neoplasm | IL15RA       | 0.000751 | 3.127308 |  |
| 19031 | Neoplasm | MYEOV        | 0.000002 | 3.139384 |  |
| 19032 | Neoplasm | PLXDC1       | 0.0035   | 3.144569 |  |
| 19033 | Neoplasm | ANKLE2       | 0.000987 | 3.151218 |  |
| 19034 | Neoplasm | C7orf46      | 0.002119 | 3.161961 |  |
| 19035 | Neoplasm | LOC100132891 | 0.000088 | 3.166236 |  |
| 19036 | Neoplasm | C20orf20     | 0        | 3.177504 |  |
| 19037 | Neoplasm | DKC1         | 0.000152 | 3.185826 |  |
| 19038 | Neoplasm | GREM1        | 0        | 3.195002 |  |
| 19039 | Neoplasm | KIF26B       | 0        | 3.195147 |  |
| 19040 | Neoplasm | C11orf82     | 0        | 3.210526 |  |
| 19041 | Neoplasm | EEF1E1       | 0.000375 | 3.219963 |  |
| 19042 | Neoplasm | FAM150A      | 0        | 3.226216 |  |
| 19043 | Neoplasm | XK           | 0.012506 | 3.234752 |  |
| 19044 | Neoplasm | NUTF2        | 0        | 3.241433 |  |
| 19045 | Neoplasm | CEP55        | 0        | 3.248565 |  |
| 19046 | Neoplasm | LOC100507273 | 0.001601 | 3.2515   |  |
| 19047 | Neoplasm | SOD2         | 0        | 3.254564 |  |
| 19048 | Neoplasm | SRPK2        | 0.001532 | 3.255359 |  |



|       |          |            |          |          |  |
|-------|----------|------------|----------|----------|--|
| 19049 | Neoplasm | GOLT1A     | 0.026406 | 3.283054 |  |
| 19050 | Neoplasm | GPSM2      | 0        | 3.29156  |  |
| 19051 | Neoplasm | NEBL       | 0        | 3.311461 |  |
| 19052 | Neoplasm | MKI67      | 0.000284 | 3.320027 |  |
| 19053 | Neoplasm | DSG3       | 0        | 3.327281 |  |
| 19054 | Neoplasm | KCNH8      | 0        | 3.352898 |  |
| 19055 | Neoplasm | CENPP      | 0        | 3.361062 |  |
| 19056 | Neoplasm | CD3EAP     | 0        | 3.363024 |  |
| 19057 | Neoplasm | ZNF521     | 0.003047 | 3.364834 |  |
| 19058 | Neoplasm | SLC5A6     | 0        | 3.37519  |  |
| 19059 | Neoplasm | CTAGE5     | 0.003101 | 3.383509 |  |
| 19060 | Neoplasm | USP18      | 0.009776 | 3.38358  |  |
| 19061 | Neoplasm | CKS2       | 0.000011 | 3.385444 |  |
| 19062 | Neoplasm | VEGFA      | 0.009062 | 3.388828 |  |
| 19063 | Neoplasm | ZCCHC7     | 0.002825 | 3.39953  |  |
| 19064 | Neoplasm | MCM4       | 0        | 3.415645 |  |
| 19065 | Neoplasm | IGFL2      | 0        | 3.42052  |  |
| 19066 | Neoplasm | RAB36      | 0        | 3.445516 |  |
| 19067 | Neoplasm | TACSTD2    | 0        | 3.446898 |  |
| 19068 | Neoplasm | KRT17P3    | 0.0208   | 3.447893 |  |
| 19069 | Neoplasm | UBE2S      | 0        | 3.484518 |  |
| 19070 | Neoplasm | MIF        | 0.000001 | 3.504093 |  |
| 19071 | Neoplasm | KPNA2      | 0.000286 | 3.504182 |  |
| 19072 | Neoplasm | SGCD       | 0        | 3.5154   |  |
| 19073 | Neoplasm | CTSO       | 0.000276 | 3.531421 |  |
| 19074 | Neoplasm | RNASEH2A   | 0        | 3.538918 |  |
| 19075 | Neoplasm | NCRNA00152 | 0        | 3.57495  |  |
| 19076 | Neoplasm | JAM3       | 0.003955 | 3.583301 |  |
| 19077 | Neoplasm | CST1       | 0.000009 | 3.584124 |  |
| 19078 | Neoplasm | CTHRC1     | 0.000001 | 3.591327 |  |
| 19079 | Neoplasm | DIAPH3     | 0        | 3.601613 |  |
| 19080 | Neoplasm | FAM105A    | 0.004151 | 3.608109 |  |
| 19081 | Neoplasm | LOC541471  | 0        | 3.618415 |  |
| 19082 | Neoplasm | C1orf135   | 0        | 3.625709 |  |
| 19083 | Neoplasm | TMEPAI     | 0        | 3.644258 |  |
| 19084 | Neoplasm | IMPDH1     | 0        | 3.647148 |  |
| 19085 | Neoplasm | GALNT4     | 0.003537 | 3.660364 |  |
| 19086 | Neoplasm | OLFML1     | 0.001452 | 3.668098 |  |
| 19087 | Neoplasm | UNQ9368    | 0.04047  | 3.68205  |  |
| 19088 | Neoplasm | CCDC28B    | 0.017642 | 3.704768 |  |
| 19089 | Neoplasm | TSHZ3      | 0.004036 | 3.708105 |  |
| 19090 | Neoplasm | PBK        | 0.000001 | 3.714962 |  |
| 19091 | Neoplasm | DACH1      | 0        | 3.730219 |  |
| 19092 | Neoplasm | LOC729983  | 0        | 3.744879 |  |
| 19093 | Neoplasm | CLDN2      | 0.000001 | 3.758097 |  |
| 19094 | Neoplasm | NOX4       | 0.0035   | 3.76034  |  |
| 19095 | Neoplasm | OSMR       | 0.002305 | 3.789427 |  |
| 19096 | Neoplasm | TMEM97     | 0        | 3.826889 |  |
| 19097 | Neoplasm | PLK1       | 0        | 3.856794 |  |
| 19098 | Neoplasm | CEP72      | 0        | 3.868512 |  |

|       |          |              |          |          |  |
|-------|----------|--------------|----------|----------|--|
| 19099 | Neoplasm | EFNB1        | 0.043208 | 3.894275 |  |
| 19100 | Neoplasm | CDCA5        | 0        | 3.905083 |  |
| 19101 | Neoplasm | C20orf194    | 0.003783 | 3.918744 |  |
| 19102 | Neoplasm | RECQL4       | 0        | 3.936322 |  |
| 19103 | Neoplasm | RRM2         | 0.000829 | 3.969704 |  |
| 19104 | Neoplasm | PRR7         | 0        | 3.97367  |  |
| 19105 | Neoplasm | BUB1         | 0.000689 | 3.980634 |  |
| 19106 | Neoplasm | CRISPLD1     | 0.002722 | 4.001952 |  |
| 19107 | Neoplasm | C13orf3      | 0        | 4.004113 |  |
| 19108 | Neoplasm | S100A14      | 0.010357 | 4.07712  |  |
| 19109 | Neoplasm | PMEPA1       | 0        | 4.105964 |  |
| 19110 | Neoplasm | CXCL9        | 0        | 4.116745 |  |
| 19111 | Neoplasm | RNASE4       | 0.002448 | 4.132003 |  |
| 19112 | Neoplasm | C5orf22      | 0.000215 | 4.134619 |  |
| 19113 | Neoplasm | PALMD        | 0.000401 | 4.163473 |  |
| 19114 | Neoplasm | AGT          | 0        | 4.16549  |  |
| 19115 | Neoplasm | HOMER1       | 0.000221 | 4.184058 |  |
| 19116 | Neoplasm | FLRT3        | 0.001996 | 4.187701 |  |
| 19117 | Neoplasm | GPT2         | 0        | 4.188257 |  |
| 19118 | Neoplasm | ANLN         | 0        | 4.191852 |  |
| 19119 | Neoplasm | ADAMTS12     | 0        | 4.218924 |  |
| 19120 | Neoplasm | SHANK3       | 0.000088 | 4.241882 |  |
| 19121 | Neoplasm | KLK12        | 0        | 4.257902 |  |
| 19122 | Neoplasm | MDS1         | 0.019251 | 4.274456 |  |
| 19123 | Neoplasm | UBE2C        | 0        | 4.291768 |  |
| 19124 | Neoplasm | ATP11A       | 0        | 4.320655 |  |
| 19125 | Neoplasm | CENPA        | 0.000102 | 4.326599 |  |
| 19126 | Neoplasm | CTGF         | 0.007694 | 4.35217  |  |
| 19127 | Neoplasm | MAD2L1       | 0.000242 | 4.362649 |  |
| 19128 | Neoplasm | MET          | 0.000367 | 4.404876 |  |
| 19129 | Neoplasm | HRASLS5      | 0.015219 | 4.453144 |  |
| 19130 | Neoplasm | PKDCC        | 0.003235 | 4.47494  |  |
| 19131 | Neoplasm | PLSCR1       | 0.013005 | 4.549961 |  |
| 19132 | Neoplasm | C5orf13      | 0.00134  | 4.615696 |  |
| 19133 | Neoplasm | CRYZ         | 0.000002 | 4.621228 |  |
| 19134 | Neoplasm | ST3GAL4      | 0.012273 | 4.627901 |  |
| 19135 | Neoplasm | EMCN         | 0.000005 | 4.630426 |  |
| 19136 | Neoplasm | LHFP         | 0.001286 | 4.637089 |  |
| 19137 | Neoplasm | FJX1         | 0        | 4.63841  |  |
| 19138 | Neoplasm | PPARG        | 0.00703  | 4.640094 |  |
| 19139 | Neoplasm | SLC29A1      | 0        | 4.643131 |  |
| 19140 | Neoplasm | GPR124       | 0.002825 | 4.654939 |  |
| 19141 | Neoplasm | MMP10        | 0        | 4.667151 |  |
| 19142 | Neoplasm | MDFI         | 0        | 4.672014 |  |
| 19143 | Neoplasm | BGN          | 0        | 4.679161 |  |
| 19144 | Neoplasm | BCL2L14      | 0.000398 | 4.680959 |  |
| 19145 | Neoplasm | LOC100505633 | 0.002448 | 4.693542 |  |
| 19146 | Neoplasm | OXR1         | 0.002833 | 4.754361 |  |
| 19147 | Neoplasm | DLC1         | 0.000604 | 4.787099 |  |
| 19148 | Neoplasm | CXCL10       | 0        | 4.8737   |  |

|       |          |              |          |           |  |
|-------|----------|--------------|----------|-----------|--|
| 19149 | Neoplasm | RAET1L       | 0.004617 | 4.928519  |  |
| 19150 | Neoplasm | MRPL39       | 0.000257 | 5.00501   |  |
| 19151 | Neoplasm | C1QC         | 0.001084 | 5.072804  |  |
| 19152 | Neoplasm | RSPH1        | 0.012291 | 5.126456  |  |
| 19153 | Neoplasm | C4orf48      | 0        | 5.141066  |  |
| 19154 | Neoplasm | MYBL2        | 0        | 5.144589  |  |
| 19155 | Neoplasm | MEX3A        | 0        | 5.153724  |  |
| 19156 | Neoplasm | PTGS2        | 0.001724 | 5.186053  |  |
| 19157 | Neoplasm | STXBP6       | 0.002233 | 5.208208  |  |
| 19158 | Neoplasm | RHOJ         | 0.003381 | 5.347863  |  |
| 19159 | Neoplasm | CXCL5        | 0        | 5.376774  |  |
| 19160 | Neoplasm | S100P        | 0.005175 | 5.387289  |  |
| 19161 | Neoplasm | MS4A6A       | 0.003928 | 5.396421  |  |
| 19162 | Neoplasm | IGHG3        | 0        | 5.509341  |  |
| 19163 | Neoplasm | SGPP2        | 0.010821 | 5.512257  |  |
| 19164 | Neoplasm | TMEM132A     | 0        | 5.551164  |  |
| 19165 | Neoplasm | LCN2         | 0        | 5.767922  |  |
| 19166 | Neoplasm | RGS16        | 0        | 5.773838  |  |
| 19167 | Neoplasm | HTRA1        | 0.000987 | 5.780102  |  |
| 19168 | Neoplasm | TCF4         | 0.00134  | 5.904301  |  |
| 19169 | Neoplasm | SRSF6        | 0.000001 | 6.156758  |  |
| 19170 | Neoplasm | APOL1        | 0.0141   | 6.300155  |  |
| 19171 | Neoplasm | ABHD7        | 0        | 6.354725  |  |
| 19172 | Neoplasm | MYOCD        | 0.002407 | 6.59146   |  |
| 19173 | Neoplasm | LGR4         | 0.002809 | 6.622405  |  |
| 19174 | Neoplasm | TGM2         | 0        | 6.930905  |  |
| 19175 | Neoplasm | FAR2         | 0.000226 | 7.073809  |  |
| 19176 | Neoplasm | IFITM4P      | 0        | 7.380925  |  |
| 19177 | Neoplasm | MECOM        | 0.003866 | 7.563299  |  |
| 19178 | Neoplasm | GUCY1B3      | 0.001934 | 7.625543  |  |
| 19179 | Neoplasm | LOC643100    | 0.030738 | 7.826251  |  |
| 19180 | Neoplasm | SALL4        | 0        | 8.221887  |  |
| 19181 | Neoplasm | TUBB3        | 0        | 8.247184  |  |
| 19182 | Neoplasm | TNFRSF11A    | 0.004078 | 8.379459  |  |
| 19183 | Neoplasm | TNS4         | 0        | 8.857143  |  |
| 19184 | Neoplasm | AZGP1        | 0        | 9.230461  |  |
| 19185 | Neoplasm | APLN         | 0        | 9.587494  |  |
| 19186 | Neoplasm | SLFN5        | 0.014912 | 9.754985  |  |
| 19187 | Neoplasm | COL12A1      | 0        | 9.976386  |  |
| 19188 | Neoplasm | COL8A1       | 0        | 10.33022  |  |
| 19189 | Neoplasm | LAMA4        | 0.000582 | 10.435952 |  |
| 19190 | Neoplasm | CEACAM3      | 0.019919 | 10.675148 |  |
| 19191 | Neoplasm | PITX2        | 0        | 11.538284 |  |
| 19192 | Neoplasm | DPP4         | 0.000314 | 13.371282 |  |
| 19193 | Neoplasm | LOC100124692 | 0.000007 | 17.396142 |  |
| 19194 | Neoplasm | IGFBP7       | 0.004056 | 18.961215 |  |
| 19195 | Neoplasm | PTPRR        | 0.000377 | 27.455622 |  |
| 19196 | Neoplasm | FAM198B      | 0.000001 | 29.031479 |  |
| 19197 | Neoplasm | NAT12        | 0.000307 | 32.336224 |  |
| 19198 | Neoplasm | RARRES3      | 0.002013 | 42.38824  |  |

|       |                     |            |          |            |  |
|-------|---------------------|------------|----------|------------|--|
| 19199 | Neoplasm            | NUDT5      | 0.000037 | 376.844444 |  |
| 19200 | Neoplasm Metastasis | SLC26A3    | 0.000017 | -7.67746   |  |
| 19201 | Neoplasm Metastasis | MUC2       | 0        | -7.661883  |  |
| 19202 | Neoplasm Metastasis | DMN        | 0        | -7.500718  |  |
| 19203 | Neoplasm Metastasis | FRMD3      | 0.000006 | -6.633007  |  |
| 19204 | Neoplasm Metastasis | CHGA       | 0.000004 | -6.084005  |  |
| 19205 | Neoplasm Metastasis | DES        | 0        | -6.019378  |  |
| 19206 | Neoplasm Metastasis | LMO3       | 0        | -5.73808   |  |
| 19207 | Neoplasm Metastasis | GSR        | 0.000011 | -5.729375  |  |
| 19208 | Neoplasm Metastasis | CNN1       | 0        | -5.726561  |  |
| 19209 | Neoplasm Metastasis | NTN2L      | 0.000006 | -5.322837  |  |
| 19210 | Neoplasm Metastasis | PDE5A      | 0        | -5.13904   |  |
| 19211 | Neoplasm Metastasis | HLA-C      | 0.000011 | -5.090134  |  |
| 19212 | Neoplasm Metastasis | CWH43      | 0        | -4.72983   |  |
| 19213 | Neoplasm Metastasis | PRPH       | 0        | -4.504848  |  |
| 19214 | Neoplasm Metastasis | HAND1      | 0        | -4.491088  |  |
| 19215 | Neoplasm Metastasis | ST6GALNAC1 | 0        | -4.4897    |  |
| 19216 | Neoplasm Metastasis | CXCL14     | 0.000133 | -4.05581   |  |
| 19217 | Neoplasm Metastasis | THBS4      | 0        | -3.966928  |  |
| 19218 | Neoplasm Metastasis | FAM55A     | 0        | -3.924033  |  |
| 19219 | Neoplasm Metastasis | CASQ2      | 0        | -3.861067  |  |
| 19220 | Neoplasm Metastasis | MFAP5      | 0        | -3.840655  |  |
| 19221 | Neoplasm Metastasis | APEG1      | 0        | -3.817307  |  |
| 19222 | Neoplasm Metastasis | BEST2      | 0        | -3.779822  |  |
| 19223 | Neoplasm Metastasis | BAPX1      | 0        | -3.764069  |  |
| 19224 | Neoplasm Metastasis | LOC340843  | 0        | -3.741315  |  |
| 19225 | Neoplasm Metastasis | PLA2G10    | 0        | -3.722207  |  |
| 19226 | Neoplasm Metastasis | ATP1A2     | 0        | -3.719575  |  |
| 19227 | Neoplasm Metastasis | P2RY14     | 0        | -3.687764  |  |
| 19228 | Neoplasm Metastasis | FBLN1      | 0.000002 | -3.606652  |  |
| 19229 | Neoplasm Metastasis | REG4       | 0.000059 | -3.503367  |  |
| 19230 | Neoplasm Metastasis | WFDC1      | 0        | -3.487965  |  |
| 19231 | Neoplasm Metastasis | C14ORF132  | 0        | -3.474085  |  |
| 19232 | Neoplasm Metastasis | JPH2       | 0        | -3.444662  |  |
| 19233 | Neoplasm Metastasis | KCNMA1     | 0        | -3.420412  |  |
| 19234 | Neoplasm Metastasis | RASL12     | 0        | -3.339297  |  |
| 19235 | Neoplasm Metastasis | SLC4A4     | 0        | -3.289428  |  |
| 19236 | Neoplasm Metastasis | NKX2-3     | 0        | -3.194695  |  |
| 19237 | Neoplasm Metastasis | CLDN8      | 0        | -3.15702   |  |
| 19238 | Neoplasm Metastasis | PRKAR2B    | 0        | -3.118384  |  |
| 19239 | Neoplasm Metastasis | CALD1      | 0        | -3.105043  |  |
| 19240 | Neoplasm Metastasis | SELENBP1   | 0.000071 | -3.066158  |  |
| 19241 | Neoplasm Metastasis | DARC       | 0.000001 | -3.028116  |  |
| 19242 | Neoplasm Metastasis | PSG4       | 0.004305 | -3.006374  |  |
| 19243 | Neoplasm Metastasis | AKR1B10    | 0.000698 | -3.002267  |  |
| 19244 | Neoplasm Metastasis | LRRN2      | 0        | -2.998523  |  |
| 19245 | Neoplasm Metastasis | HOXD11     | 0        | -2.977418  |  |
| 19246 | Neoplasm Metastasis | MKKS       | 0.003646 | -2.939498  |  |
| 19247 | Neoplasm Metastasis | VMD2L1     | 0.000134 | -2.885943  |  |
| 19248 | Neoplasm Metastasis | SSPN       | 0        | -2.865316  |  |

|       |                     |          |          |           |  |
|-------|---------------------|----------|----------|-----------|--|
| 19249 | Neoplasm Metastasis | GCG      | 0        | -2.841612 |  |
| 19250 | Neoplasm Metastasis | OGDH     | 0.000409 | -2.824938 |  |
| 19251 | Neoplasm Metastasis | TOX      | 0        | -2.822165 |  |
| 19252 | Neoplasm Metastasis | GPA33    | 0.000665 | -2.816748 |  |
| 19253 | Neoplasm Metastasis | VWF      | 0.000708 | -2.797215 |  |
| 19254 | Neoplasm Metastasis | SAHH3    | 0.000006 | -2.796622 |  |
| 19255 | Neoplasm Metastasis | CA12     | 0.000281 | -2.753664 |  |
| 19256 | Neoplasm Metastasis | ZFYVE1   | 0        | -2.721154 |  |
| 19257 | Neoplasm Metastasis | HSD11B2  | 0.000411 | -2.707869 |  |
| 19258 | Neoplasm Metastasis | OLFML2A  | 0        | -2.701749 |  |
| 19259 | Neoplasm Metastasis | IGHA1    | 0.000001 | -2.6695   |  |
| 19260 | Neoplasm Metastasis | TWSG1    | 0        | -2.659835 |  |
| 19261 | Neoplasm Metastasis | SPON1    | 0.000432 | -2.646048 |  |
| 19262 | Neoplasm Metastasis | CAPN9    | 0.000016 | -2.643441 |  |
| 19263 | Neoplasm Metastasis | LMOD1    | 0        | -2.638127 |  |
| 19264 | Neoplasm Metastasis | CCL13    | 0.000261 | -2.615183 |  |
| 19265 | Neoplasm Metastasis | CPA3     | 0        | -2.60624  |  |
| 19266 | Neoplasm Metastasis | VCL      | 0        | -2.583848 |  |
| 19267 | Neoplasm Metastasis | PTGER2   | 0        | -2.583267 |  |
| 19268 | Neoplasm Metastasis | STON1    | 0        | -2.562703 |  |
| 19269 | Neoplasm Metastasis | FHL1     | 0        | -2.554559 |  |
| 19270 | Neoplasm Metastasis | DACT3    | 0        | -2.549765 |  |
| 19271 | Neoplasm Metastasis | FLJ21511 | 0        | -2.545136 |  |
| 19272 | Neoplasm Metastasis | GREM1    | 0        | -2.542547 |  |
| 19273 | Neoplasm Metastasis | HSPA2    | 0        | -2.541351 |  |
| 19274 | Neoplasm Metastasis | AGR3     | 0.000704 | -2.508426 |  |
| 19275 | Neoplasm Metastasis | FOXF2    | 0        | -2.48074  |  |
| 19276 | Neoplasm Metastasis | NR3C2    | 0        | -2.469881 |  |
| 19277 | Neoplasm Metastasis | SLCO2A1  | 0.000002 | -2.469144 |  |
| 19278 | Neoplasm Metastasis | CHL1     | 0        | -2.465884 |  |
| 19279 | Neoplasm Metastasis | ELOVL6   | 0        | -2.453167 |  |
| 19280 | Neoplasm Metastasis | TMIGD1   | 0        | -2.446872 |  |
| 19281 | Neoplasm Metastasis | SERTAD4  | 0        | -2.433668 |  |
| 19282 | Neoplasm Metastasis | MATN2    | 0        | -2.427093 |  |
| 19283 | Neoplasm Metastasis | WNT5A    | 0        | -2.425019 |  |
| 19284 | Neoplasm Metastasis | AGR2     | 0.000531 | -2.405779 |  |
| 19285 | Neoplasm Metastasis | KIAA0828 | 0        | -2.389916 |  |
| 19286 | Neoplasm Metastasis | ABP1     | 0.000179 | -2.385219 |  |
| 19287 | Neoplasm Metastasis | PGM5     | 0.000314 | -2.364494 |  |
| 19288 | Neoplasm Metastasis | DIO2     | 0        | -2.356839 |  |
| 19289 | Neoplasm Metastasis | ARHGAP1  | 0        | -2.348833 |  |
| 19290 | Neoplasm Metastasis | SCARA5   | 0.000025 | -2.332101 |  |
| 19291 | Neoplasm Metastasis | MYO1A    | 0.000642 | -2.309044 |  |
| 19292 | Neoplasm Metastasis | INSL5    | 0        | -2.298135 |  |
| 19293 | Neoplasm Metastasis | NNAT     | 0        | -2.292745 |  |
| 19294 | Neoplasm Metastasis | HMGCR    | 0.000015 | -2.289966 |  |
| 19295 | Neoplasm Metastasis | SCNN1B   | 0.000177 | -2.287546 |  |
| 19296 | Neoplasm Metastasis | KLF4     | 0        | -2.276513 |  |
| 19297 | Neoplasm Metastasis | C15orf48 | 0.000105 | -2.264361 |  |
| 19298 | Neoplasm Metastasis | FRZB     | 0.000071 | -2.263728 |  |

|       |                     |           |          |           |  |
|-------|---------------------|-----------|----------|-----------|--|
| 19299 | Neoplasm Metastasis | BTNL3     | 0.000071 | -2.24713  |  |
| 19300 | Neoplasm Metastasis | MS4A8B    | 0.000135 | -2.245197 |  |
| 19301 | Neoplasm Metastasis | DDR2      | 0        | -2.222107 |  |
| 19302 | Neoplasm Metastasis | RGMA      | 0.000001 | -2.216106 |  |
| 19303 | Neoplasm Metastasis | BVES      | 0        | -2.211583 |  |
| 19304 | Neoplasm Metastasis | C5ORF5    | 0        | -2.20954  |  |
| 19305 | Neoplasm Metastasis | AOC3      | 0        | -2.202195 |  |
| 19306 | Neoplasm Metastasis | TMIGD     | 0.000335 | -2.196593 |  |
| 19307 | Neoplasm Metastasis | NLGN4X    | 0        | -2.184679 |  |
| 19308 | Neoplasm Metastasis | ZMIZ1     | 0        | -2.174006 |  |
| 19309 | Neoplasm Metastasis | HERC1     | 0.00032  | -2.164396 |  |
| 19310 | Neoplasm Metastasis | CTSG      | 0.000001 | -2.15913  |  |
| 19311 | Neoplasm Metastasis | SYNC1     | 0        | -2.154301 |  |
| 19312 | Neoplasm Metastasis | DRD1IP    | 0        | -2.152948 |  |
| 19313 | Neoplasm Metastasis | OXCT1     | 0        | -2.149785 |  |
| 19314 | Neoplasm Metastasis | BMP2      | 0        | -2.148424 |  |
| 19315 | Neoplasm Metastasis | TSPAN7    | 0.000705 | -2.148268 |  |
| 19316 | Neoplasm Metastasis | LRCH2     | 0        | -2.1482   |  |
| 19317 | Neoplasm Metastasis | SOX15     | 0        | -2.145645 |  |
| 19318 | Neoplasm Metastasis | LAMA1     | 0        | -2.144402 |  |
| 19319 | Neoplasm Metastasis | TMEM54    | 0.000211 | -2.141421 |  |
| 19320 | Neoplasm Metastasis | TAGLN     | 0.003011 | -2.13702  |  |
| 19321 | Neoplasm Metastasis | PDE4D     | 0        | -2.135113 |  |
| 19322 | Neoplasm Metastasis | Q8NBX4    | 0.000102 | -2.127648 |  |
| 19323 | Neoplasm Metastasis | NSG1      | 0        | -2.121418 |  |
| 19324 | Neoplasm Metastasis | DIXDC1    | 0        | -2.11124  |  |
| 19325 | Neoplasm Metastasis | PLAT      | 0.000028 | -2.107739 |  |
| 19326 | Neoplasm Metastasis | PBK       | 0        | -2.096207 |  |
| 19327 | Neoplasm Metastasis | SYNC      | 0        | -2.093807 |  |
| 19328 | Neoplasm Metastasis | HSPB3     | 0        | -2.092056 |  |
| 19329 | Neoplasm Metastasis | CSRP1     | 0.000153 | -2.081023 |  |
| 19330 | Neoplasm Metastasis | RPRM      | 0        | -2.078294 |  |
| 19331 | Neoplasm Metastasis | ADSV      | 0.000576 | -2.070961 |  |
| 19332 | Neoplasm Metastasis | HAPLN1    | 0        | -2.070549 |  |
| 19333 | Neoplasm Metastasis | CD79A     | 0.000427 | -2.069078 |  |
| 19334 | Neoplasm Metastasis | SCUBE2    | 0        | -2.068644 |  |
| 19335 | Neoplasm Metastasis | TPM1      | 0        | -2.067855 |  |
| 19336 | Neoplasm Metastasis | PTCHD1    | 0        | -2.064622 |  |
| 19337 | Neoplasm Metastasis | LOH11CR2A | 0.003159 | -2.056708 |  |
| 19338 | Neoplasm Metastasis | PDZRN4    | 0        | -2.044879 |  |
| 19339 | Neoplasm Metastasis | NUDT6     | 0        | -2.043593 |  |
| 19340 | Neoplasm Metastasis | ITIH5     | 0        | -2.029161 |  |
| 19341 | Neoplasm Metastasis | EXOC5     | 0        | -2.027885 |  |
| 19342 | Neoplasm Metastasis | ZMYND11   | 0        | -2.02749  |  |
| 19343 | Neoplasm Metastasis | SNAP23    | 0        | -2.011665 |  |
| 19344 | Neoplasm Metastasis | PRRT2     | 0        | -2.008478 |  |
| 19345 | Neoplasm Metastasis | MALL      | 0.00058  | -2.001755 |  |
| 19346 | Neoplasm Metastasis | H19       | 0.002505 | 2.028469  |  |
| 19347 | Neoplasm Metastasis | C2        | 0.000472 | 2.039869  |  |
| 19348 | Neoplasm Metastasis | CKLF      | 0        | 2.057666  |  |

|       |                     |              |          |          |  |
|-------|---------------------|--------------|----------|----------|--|
| 19349 | Neoplasm Metastasis | CCDC93       | 0        | 2.078317 |  |
| 19350 | Neoplasm Metastasis | KLF7         | 0.000006 | 2.092401 |  |
| 19351 | Neoplasm Metastasis | TMEM49       | 0        | 2.095377 |  |
| 19352 | Neoplasm Metastasis | USP34        | 0.000005 | 2.109417 |  |
| 19353 | Neoplasm Metastasis | SERINC5      | 0.000004 | 2.188872 |  |
| 19354 | Neoplasm Metastasis | EML4         | 0        | 2.191544 |  |
| 19355 | Neoplasm Metastasis | MSLN         | 0.002114 | 2.196121 |  |
| 19356 | Neoplasm Metastasis | ARHGEF2      | 0.000016 | 2.197076 |  |
| 19357 | Neoplasm Metastasis | OLR1         | 0.000557 | 2.207088 |  |
| 19358 | Neoplasm Metastasis | MPHOSPH8     | 0.000004 | 2.214199 |  |
| 19359 | Neoplasm Metastasis | COX6C        | 0        | 2.244844 |  |
| 19360 | Neoplasm Metastasis | LOC440589    | 0        | 2.249777 |  |
| 19361 | Neoplasm Metastasis | DGKH         | 0.000001 | 2.302271 |  |
| 19362 | Neoplasm Metastasis | LOC727820    | 0        | 2.307956 |  |
| 19363 | Neoplasm Metastasis | MGC16384     | 0.000006 | 2.346782 |  |
| 19364 | Neoplasm Metastasis | WDR12        | 0        | 2.379028 |  |
| 19365 | Neoplasm Metastasis | COL1A1       | 0        | 2.395517 |  |
| 19366 | Neoplasm Metastasis | CSNK1A1      | 0.000004 | 2.40641  |  |
| 19367 | Neoplasm Metastasis | NRBP2        | 0        | 2.409324 |  |
| 19368 | Neoplasm Metastasis | CBS          | 0.000703 | 2.411396 |  |
| 19369 | Neoplasm Metastasis | ADFP         | 0.00024  | 2.429958 |  |
| 19370 | Neoplasm Metastasis | ANGPTL4      | 0.000173 | 2.440066 |  |
| 19371 | Neoplasm Metastasis | ADAMTSL2     | 0.000012 | 2.453786 |  |
| 19372 | Neoplasm Metastasis | CYBA         | 0        | 2.455506 |  |
| 19373 | Neoplasm Metastasis | RPL29        | 0        | 2.488888 |  |
| 19374 | Neoplasm Metastasis | CLK1         | 0.000007 | 2.490114 |  |
| 19375 | Neoplasm Metastasis | SFRS18       | 0        | 2.509521 |  |
| 19376 | Neoplasm Metastasis | CYP1B1       | 0.000314 | 2.525663 |  |
| 19377 | Neoplasm Metastasis | EIF3B        | 0.000014 | 2.53144  |  |
| 19378 | Neoplasm Metastasis | NSFL1C       | 0.000011 | 2.537637 |  |
| 19379 | Neoplasm Metastasis | CTSB         | 0        | 2.543662 |  |
| 19380 | Neoplasm Metastasis | C4orf30      | 0.000017 | 2.621492 |  |
| 19381 | Neoplasm Metastasis | ALDH4A1      | 0.000232 | 2.672146 |  |
| 19382 | Neoplasm Metastasis | FOXJ3        | 0.000019 | 2.674279 |  |
| 19383 | Neoplasm Metastasis | CGNL1        | 0.000004 | 2.694607 |  |
| 19384 | Neoplasm Metastasis | RP11-298P3.3 | 0.000001 | 2.733297 |  |
| 19385 | Neoplasm Metastasis | CFHL1        | 0.002892 | 2.741774 |  |
| 19386 | Neoplasm Metastasis | AKAP8L       | 0.000016 | 2.772168 |  |
| 19387 | Neoplasm Metastasis | FNBP4        | 0        | 2.773925 |  |
| 19388 | Neoplasm Metastasis | ZNF83        | 0.000021 | 2.8262   |  |
| 19389 | Neoplasm Metastasis | AZGP1        | 0.002972 | 2.844943 |  |
| 19390 | Neoplasm Metastasis | VPS13C       | 0.000001 | 2.860054 |  |
| 19391 | Neoplasm Metastasis | TRIF         | 0.000391 | 2.916183 |  |
| 19392 | Neoplasm Metastasis | LOC26010     | 0.000013 | 2.919209 |  |
| 19393 | Neoplasm Metastasis | CFI          | 0.000174 | 2.93439  |  |
| 19394 | Neoplasm Metastasis | INHBE        | 0.000642 | 2.971835 |  |
| 19395 | Neoplasm Metastasis | TM4SF4       | 0.000002 | 2.983023 |  |
| 19396 | Neoplasm Metastasis | RPL38        | 0        | 3.002224 |  |
| 19397 | Neoplasm Metastasis | YAP1         | 0.000001 | 3.066516 |  |
| 19398 | Neoplasm Metastasis | ZNF207       | 0.000004 | 3.084116 |  |

|       |                     |           |          |          |  |
|-------|---------------------|-----------|----------|----------|--|
| 19399 | Neoplasm Metastasis | C7orf54   | 0.000012 | 3.097033 |  |
| 19400 | Neoplasm Metastasis | ZNF364    | 0.000009 | 3.107203 |  |
| 19401 | Neoplasm Metastasis | LOC441775 | 0        | 3.107298 |  |
| 19402 | Neoplasm Metastasis | F5        | 0.00014  | 3.231423 |  |
| 19403 | Neoplasm Metastasis | BF        | 0.000076 | 3.280719 |  |
| 19404 | Neoplasm Metastasis | RBM39     | 0.000001 | 3.303166 |  |
| 19405 | Neoplasm Metastasis | CDH2      | 0        | 3.362404 |  |
| 19406 | Neoplasm Metastasis | MGC23985  | 0.000004 | 3.382113 |  |
| 19407 | Neoplasm Metastasis | HABP2     | 0.000351 | 3.485311 |  |
| 19408 | Neoplasm Metastasis | U2AF1     | 0.000002 | 3.513583 |  |
| 19409 | Neoplasm Metastasis | CHD2      | 0.00001  | 3.596148 |  |
| 19410 | Neoplasm Metastasis | THBS2     | 0        | 3.628814 |  |
| 19411 | Neoplasm Metastasis | VNN1      | 0.000533 | 3.670827 |  |
| 19412 | Neoplasm Metastasis | GRINA     | 0        | 3.747434 |  |
| 19413 | Neoplasm Metastasis | SYK       | 0.000006 | 3.751209 |  |
| 19414 | Neoplasm Metastasis | APOE      | 0        | 3.797515 |  |
| 19415 | Neoplasm Metastasis | AQP9      | 0.000053 | 3.849158 |  |
| 19416 | Neoplasm Metastasis | HSD11B1   | 0.000121 | 3.932743 |  |
| 19417 | Neoplasm Metastasis | GTF3A     | 0.000012 | 3.956153 |  |
| 19418 | Neoplasm Metastasis | TBRG1     | 0        | 4.005367 |  |
| 19419 | Neoplasm Metastasis | SERF2     | 0        | 4.007006 |  |
| 19420 | Neoplasm Metastasis | TXN       | 0        | 4.097941 |  |
| 19421 | Neoplasm Metastasis | SNAPC3    | 0.000002 | 4.188509 |  |
| 19422 | Neoplasm Metastasis | CCNL1     | 0.000021 | 4.215768 |  |
| 19423 | Neoplasm Metastasis | ASGR2     | 0.000553 | 4.302714 |  |
| 19424 | Neoplasm Metastasis | SERPINA5  | 0.000352 | 4.345646 |  |
| 19425 | Neoplasm Metastasis | C11orf58  | 0.000007 | 4.378468 |  |
| 19426 | Neoplasm Metastasis | ALDOB     | 0.001493 | 4.480913 |  |
| 19427 | Neoplasm Metastasis | SMURF2    | 0.000012 | 4.524036 |  |
| 19428 | Neoplasm Metastasis | GLUD1     | 0.000014 | 4.578576 |  |
| 19429 | Neoplasm Metastasis | ZNF785    | 0.000008 | 4.674523 |  |
| 19430 | Neoplasm Metastasis | SULT2A1   | 0.000605 | 4.720173 |  |
| 19431 | Neoplasm Metastasis | FMO3      | 0.000071 | 4.720673 |  |
| 19432 | Neoplasm Metastasis | RPS15A    | 0        | 4.778026 |  |
| 19433 | Neoplasm Metastasis | IFNGR1    | 0        | 4.786103 |  |
| 19434 | Neoplasm Metastasis | SERPINF2  | 0.00067  | 4.841546 |  |
| 19435 | Neoplasm Metastasis | PCF11     | 0.000007 | 4.990015 |  |
| 19436 | Neoplasm Metastasis | PICALM    | 0.000013 | 5.138198 |  |
| 19437 | Neoplasm Metastasis | RPL35A    | 0        | 5.301532 |  |
| 19438 | Neoplasm Metastasis | CP        | 0.00038  | 5.509002 |  |
| 19439 | Neoplasm Metastasis | CPB2      | 0.000432 | 5.613978 |  |
| 19440 | Neoplasm Metastasis | KIAA0907  | 0.000007 | 5.62551  |  |
| 19441 | Neoplasm Metastasis | C3        | 0.000006 | 5.668511 |  |
| 19442 | Neoplasm Metastasis | RPS17     | 0        | 5.675517 |  |
| 19443 | Neoplasm Metastasis | ZNF638    | 0        | 5.912399 |  |
| 19444 | Neoplasm Metastasis | SLC13A5   | 0.000331 | 6.076943 |  |
| 19445 | Neoplasm Metastasis | C8A       | 0.000531 | 6.120991 |  |
| 19446 | Neoplasm Metastasis | LOC440354 | 0.000014 | 6.198988 |  |
| 19447 | Neoplasm Metastasis | RBP4      | 0.000557 | 6.658636 |  |
| 19448 | Neoplasm Metastasis | ASGR1     | 0.000048 | 6.679332 |  |



|       |                     |          |          |           |  |
|-------|---------------------|----------|----------|-----------|--|
| 19449 | Neoplasm Metastasis | C5       | 0.00011  | 6.687382  |  |
| 19450 | Neoplasm Metastasis | APOH     | 0.000429 | 6.75181   |  |
| 19451 | Neoplasm Metastasis | FCN3     | 0.000009 | 6.844049  |  |
| 19452 | Neoplasm Metastasis | APOC2    | 0.000051 | 6.904064  |  |
| 19453 | Neoplasm Metastasis | ZMYND8   | 0.000009 | 6.92901   |  |
| 19454 | Neoplasm Metastasis | AGXT     | 0.000773 | 6.935567  |  |
| 19455 | Neoplasm Metastasis | HPD      | 0.000531 | 7.014538  |  |
| 19456 | Neoplasm Metastasis | ITIH2    | 0.000149 | 7.015858  |  |
| 19457 | Neoplasm Metastasis | C6       | 0.00046  | 7.054535  |  |
| 19458 | Neoplasm Metastasis | SAA1     | 0.000035 | 7.064054  |  |
| 19459 | Neoplasm Metastasis | SAA4     | 0.000529 | 7.065     |  |
| 19460 | Neoplasm Metastasis | MBNL2    | 0        | 7.194229  |  |
| 19461 | Neoplasm Metastasis | PLG      | 0.000498 | 7.361402  |  |
| 19462 | Neoplasm Metastasis | MEGF6    | 0.000022 | 7.507018  |  |
| 19463 | Neoplasm Metastasis | ITIH1    | 0.000337 | 7.554118  |  |
| 19464 | Neoplasm Metastasis | C4BPA    | 0.000535 | 7.948833  |  |
| 19465 | Neoplasm Metastasis | APOC1    | 0.000001 | 8.000367  |  |
| 19466 | Neoplasm Metastasis | TTR      | 0.000676 | 8.109081  |  |
| 19467 | Neoplasm Metastasis | CYP2C8   | 0.000673 | 8.207707  |  |
| 19468 | Neoplasm Metastasis | LBP      | 0.000127 | 8.984359  |  |
| 19469 | Neoplasm Metastasis | HAMP     | 0.000059 | 9.033264  |  |
| 19470 | Neoplasm Metastasis | KIAA0368 | 0        | 9.302099  |  |
| 19471 | Neoplasm Metastasis | APCS     | 0.000082 | 9.596353  |  |
| 19472 | Neoplasm Metastasis | XPO1     | 0.000002 | 10.357944 |  |
| 19473 | Neoplasm Metastasis | KNG1     | 0.000331 | 10.388199 |  |
| 19474 | Neoplasm Metastasis | HRG      | 0.000312 | 11.044669 |  |
| 19475 | Neoplasm Metastasis | CFLAR    | 0.000011 | 11.328732 |  |
| 19476 | Neoplasm Metastasis | SERPINC1 | 0.000285 | 11.791284 |  |
| 19477 | Neoplasm Metastasis | SERPINA3 | 0.000001 | 11.942192 |  |
| 19478 | Neoplasm Metastasis | APOB     | 0.000088 | 13.0809   |  |
| 19479 | Neoplasm Metastasis | AHSG     | 0.000112 | 13.371622 |  |
| 19480 | Neoplasm Metastasis | APOC3    | 0.000181 | 13.701454 |  |
| 19481 | Neoplasm Metastasis | HPX      | 0.000192 | 14.287143 |  |
| 19482 | Neoplasm Metastasis | FGG      | 0.000014 | 14.651355 |  |
| 19483 | Neoplasm Metastasis | GART     | 0.000001 | 15.363893 |  |
| 19484 | Neoplasm Metastasis | F2       | 0.000047 | 15.443368 |  |
| 19485 | Neoplasm Metastasis | VTN      | 0.000044 | 15.844447 |  |
| 19486 | Neoplasm Metastasis | ORM2     | 0.00009  | 16.094898 |  |
| 19487 | Neoplasm Metastasis | CYP2E1   | 0.000072 | 16.227626 |  |
| 19488 | Neoplasm Metastasis | ZBTB20   | 0.000004 | 17.367361 |  |
| 19489 | Neoplasm Metastasis | ZFAND6   | 0.000004 | 17.449033 |  |
| 19490 | Neoplasm Metastasis | PIAS1    | 0.000009 | 18.056731 |  |
| 19491 | Neoplasm Metastasis | FGL1     | 0.000039 | 18.32827  |  |
| 19492 | Neoplasm Metastasis | TF       | 0.000068 | 18.608249 |  |
| 19493 | Neoplasm Metastasis | ASXL1    | 0        | 20.752404 |  |
| 19494 | Neoplasm Metastasis | GC       | 0.000013 | 20.947027 |  |
| 19495 | Neoplasm Metastasis | AMBP     | 0.000021 | 21.099729 |  |
| 19496 | Neoplasm Metastasis | APOA2    | 0.000023 | 21.365529 |  |
| 19497 | Neoplasm Metastasis | ALB      | 0.000007 | 23.019959 |  |
| 19498 | Neoplasm Metastasis | APOA1    | 0.000018 | 23.169381 |  |

|       |                     |          |          |            |  |
|-------|---------------------|----------|----------|------------|--|
| 19499 | Neoplasm Metastasis | UBC      | 0.000009 | 23.283036  |  |
| 19500 | Neoplasm Metastasis | FGB      | 0.000008 | 23.984148  |  |
| 19501 | Neoplasm Metastasis | FGA      | 0.000008 | 25.158992  |  |
| 19502 | Neoplasm Metastasis | ORM1     | 0.000008 | 25.514711  |  |
| 19503 | Neoplasm Metastasis | SLC22A3  | 0        | 141.230932 |  |
| 19504 | Neoplasm Metastasis | PHKB     | 0        | 201.69213  |  |
| 19505 | Normal colon        | KLK10    | 0        | -32.769    |  |
| 19506 | Normal colon        | PRMT3    | 0        | -18.97913  |  |
| 19507 | Normal colon        | SLC6A6   | 0        | -13.84193  |  |
| 19508 | Normal colon        | EIF3B    | 0        | -12.407213 |  |
| 19509 | Normal colon        | SLC39A10 | 0        | -9.756089  |  |
| 19510 | Normal colon        | SPP1     | 0        | -9.715651  |  |
| 19511 | Normal colon        | INHBA    | 0        | -9.354067  |  |
| 19512 | Normal colon        | SULT2B1  | 0        | -9.136537  |  |
| 19513 | Normal colon        | C9orf140 | 0        | -8.873791  |  |
| 19514 | Normal colon        | THBS2    | 0        | -8.219835  |  |
| 19515 | Normal colon        | GINS1    | 0        | -7.92122   |  |
| 19516 | Normal colon        | CASC5    | 0        | -7.794743  |  |
| 19517 | Normal colon        | FNBP4    | 0        | -7.396388  |  |
| 19518 | Normal colon        | MMP7     | 0        | -7.340662  |  |
| 19519 | Normal colon        | EFNA3    | 0        | -7.271941  |  |
| 19520 | Normal colon        | ASPM     | 0        | -6.78092   |  |
| 19521 | Normal colon        | YAP1     | 0        | -6.763694  |  |
| 19522 | Normal colon        | KIAA1333 | 0        | -6.690645  |  |
| 19523 | Normal colon        | CYB5B    | 0        | -6.558687  |  |
| 19524 | Normal colon        | HMMR     | 0.000025 | -5.804377  |  |
| 19525 | Normal colon        | CTHRC1   | 0        | -5.556118  |  |
| 19526 | Normal colon        | TDGF1    | 0        | -5.512866  |  |
| 19527 | Normal colon        | BMP7     | 0        | -5.509887  |  |
| 19528 | Normal colon        | WNT2     | 0.029803 | -5.494799  |  |
| 19529 | Normal colon        | LGR5     | 0        | -5.401572  |  |
| 19530 | Normal colon        | ATAD2    | 0        | -5.257683  |  |
| 19531 | Normal colon        | PSAT1    | 0        | -5.234669  |  |
| 19532 | Normal colon        | SP5      | 0        | -5.135378  |  |
| 19533 | Normal colon        | CXCL3    | 0        | -5.112398  |  |
| 19534 | Normal colon        | WDR72    | 0        | -4.874852  |  |
| 19535 | Normal colon        | SULF1    | 0        | -4.791261  |  |
| 19536 | Normal colon        | TPR      | 0.040144 | -4.597873  |  |
| 19537 | Normal colon        | BGN      | 0        | -4.573511  |  |
| 19538 | Normal colon        | IL8      | 0        | -4.462238  |  |
| 19539 | Normal colon        | PEO1     | 0        | -4.420263  |  |
| 19540 | Normal colon        | GDF15    | 0        | -4.402386  |  |
| 19541 | Normal colon        | MSX2     | 0        | -4.390581  |  |
| 19542 | Normal colon        | CELSR3   | 0        | -4.276832  |  |
| 19543 | Normal colon        | RGS5     | 0.012324 | -4.256989  |  |
| 19544 | Normal colon        | MGC16384 | 0        | -4.17907   |  |
| 19545 | Normal colon        | CKS2     | 0        | -4.154271  |  |
| 19546 | Normal colon        | FABP6    | 0        | -4.123797  |  |
| 19547 | Normal colon        | XPOT     | 0.014459 | -3.992622  |  |
| 19548 | Normal colon        | AXIN2    | 0        | -3.962     |  |

|       |              |          |          |           |  |
|-------|--------------|----------|----------|-----------|--|
| 19549 | Normal colon | PDCD2L   | 0        | -3.921773 |  |
| 19550 | Normal colon | E2F5     | 0.005272 | -3.890783 |  |
| 19551 | Normal colon | CCDC86   | 0.002201 | -3.867938 |  |
| 19552 | Normal colon | RELL2    | 0.003759 | -3.855649 |  |
| 19553 | Normal colon | RANBP5   | 0        | -3.845853 |  |
| 19554 | Normal colon | B3GALTL  | 0.049356 | -3.840546 |  |
| 19555 | Normal colon | DDIT4    | 0        | -3.770709 |  |
| 19556 | Normal colon | CXCL1    | 0        | -3.733754 |  |
| 19557 | Normal colon | WDSOF1   | 0.001352 | -3.709982 |  |
| 19558 | Normal colon | COL5A2   | 0        | -3.67529  |  |
| 19559 | Normal colon | COL8A1   | 0        | -3.671237 |  |
| 19560 | Normal colon | IFITM2   | 0.026998 | -3.630915 |  |
| 19561 | Normal colon | NEBL     | 0        | -3.58656  |  |
| 19562 | Normal colon | CEP55    | 0        | -3.572883 |  |
| 19563 | Normal colon | RAET1L   | 0        | -3.565401 |  |
| 19564 | Normal colon | CGREF1   | 0        | -3.556432 |  |
| 19565 | Normal colon | CDC6     | 0.011855 | -3.551337 |  |
| 19566 | Normal colon | ZNF703   | 0.014334 | -3.548477 |  |
| 19567 | Normal colon | THY1     | 0        | -3.542619 |  |
| 19568 | Normal colon | VSNL1    | 0        | -3.514441 |  |
| 19569 | Normal colon | CST1     | 0        | -3.501851 |  |
| 19570 | Normal colon | CCL4L1   | 0.029803 | -3.423804 |  |
| 19571 | Normal colon | PTP4A3   | 0.000168 | -3.409801 |  |
| 19572 | Normal colon | PLEKHG4  | 0        | -3.370452 |  |
| 19573 | Normal colon | FANCI    | 0.0087   | -3.309157 |  |
| 19574 | Normal colon | TPD52L1  | 0        | -3.298483 |  |
| 19575 | Normal colon | BUB1     | 0.003759 | -3.279526 |  |
| 19576 | Normal colon | CTSK     | 0.016201 | -3.25472  |  |
| 19577 | Normal colon | C13orf3  | 0.010117 | -3.221261 |  |
| 19578 | Normal colon | COL3A1   | 0        | -3.185474 |  |
| 19579 | Normal colon | SERPINE2 | 0        | -3.167968 |  |
| 19580 | Normal colon | HIST3H2A | 0        | -3.152904 |  |
| 19581 | Normal colon | GUCY1A3  | 0.036003 | -3.146832 |  |
| 19582 | Normal colon | LY6E     | 0        | -3.111251 |  |
| 19583 | Normal colon | C13orf23 | 0        | -3.103547 |  |
| 19584 | Normal colon | TRIP13   | 0        | -3.030456 |  |
| 19585 | Normal colon | MET      | 0        | -3.021002 |  |
| 19586 | Normal colon | POLR1D   | 0        | -3.015749 |  |
| 19587 | Normal colon | HRASLS3  | 0        | -2.971828 |  |
| 19588 | Normal colon | POLR1C   | 0        | -2.968407 |  |
| 19589 | Normal colon | GALNT6   | 0        | -2.96054  |  |
| 19590 | Normal colon | COMP     | 0        | -2.956944 |  |
| 19591 | Normal colon | TGS1     | 0.016333 | -2.947857 |  |
| 19592 | Normal colon | URG4     | 0        | -2.94292  |  |
| 19593 | Normal colon | GCLM     | 0.03042  | -2.916423 |  |
| 19594 | Normal colon | MYH10    | 0        | -2.889597 |  |
| 19595 | Normal colon | MCM8     | 0.004563 | -2.888232 |  |
| 19596 | Normal colon | PRR7     | 0        | -2.887817 |  |
| 19597 | Normal colon | SORD     | 0        | -2.881162 |  |
| 19598 | Normal colon | C2       | 0        | -2.869311 |  |

|       |              |              |          |           |  |
|-------|--------------|--------------|----------|-----------|--|
| 19599 | Normal colon | NUPL1        | 0        | -2.849538 |  |
| 19600 | Normal colon | ASPN         | 0        | -2.844331 |  |
| 19601 | Normal colon | MTERFD1      | 0        | -2.84095  |  |
| 19602 | Normal colon | OLR1         | 0        | -2.810905 |  |
| 19603 | Normal colon | LUM          | 0.005607 | -2.802796 |  |
| 19604 | Normal colon | DPEP1        | 0        | -2.791883 |  |
| 19605 | Normal colon | PDZK1IP1     | 0        | -2.788647 |  |
| 19606 | Normal colon | FAP          | 0        | -2.767748 |  |
| 19607 | Normal colon | NOL5A        | 0        | -2.751127 |  |
| 19608 | Normal colon | CLIC3        | 0.000063 | -2.704234 |  |
| 19609 | Normal colon | TNS4         | 0        | -2.669075 |  |
| 19610 | Normal colon | SRPX2        | 0        | -2.667525 |  |
| 19611 | Normal colon | PTK7         | 0        | -2.657063 |  |
| 19612 | Normal colon | RP5-1022P6.2 | 0.036178 | -2.655837 |  |
| 19613 | Normal colon | RBM4         | 0        | -2.651058 |  |
| 19614 | Normal colon | UBE2V1       | 0.004279 | -2.625998 |  |
| 19615 | Normal colon | FJX1         | 0        | -2.622869 |  |
| 19616 | Normal colon | VEGFA        | 0        | -2.615163 |  |
| 19617 | Normal colon | EIF2C2       | 0        | -2.602762 |  |
| 19618 | Normal colon | LRP8         | 0        | -2.599647 |  |
| 19619 | Normal colon | CAD          | 0        | -2.598895 |  |
| 19620 | Normal colon | KIF5B        | 0.04388  | -2.59278  |  |
| 19621 | Normal colon | MTHFD1L      | 0        | -2.58207  |  |
| 19622 | Normal colon | IFI6         | 0        | -2.565786 |  |
| 19623 | Normal colon | NOX4         | 0        | -2.545509 |  |
| 19624 | Normal colon | SLC7A6       | 0.005899 | -2.538138 |  |
| 19625 | Normal colon | GPR56        | 0        | -2.513165 |  |
| 19626 | Normal colon | AMIGO2       | 0.000027 | -2.510275 |  |
| 19627 | Normal colon | CDCA5        | 0        | -2.498019 |  |
| 19628 | Normal colon | RPL35A       | 0.023557 | -2.488761 |  |
| 19629 | Normal colon | TMEM132A     | 0        | -2.455723 |  |
| 19630 | Normal colon | BLCAP        | 0.018234 | -2.455585 |  |
| 19631 | Normal colon | ALG11        | 0.030134 | -2.45445  |  |
| 19632 | Normal colon | RAD54B       | 0        | -2.430731 |  |
| 19633 | Normal colon | ATP11A       | 0        | -2.429617 |  |
| 19634 | Normal colon | CSPP1        | 0.004279 | -2.417897 |  |
| 19635 | Normal colon | TNFRSF11B    | 0.000263 | -2.412846 |  |
| 19636 | Normal colon | RSF1         | 0.025728 | -2.405661 |  |
| 19637 | Normal colon | CCND1        | 0        | -2.37772  |  |
| 19638 | Normal colon | SLC29A1      | 0        | -2.371082 |  |
| 19639 | Normal colon | PAFAH1B3     | 0        | -2.368768 |  |
| 19640 | Normal colon | TMEM63A      | 0        | -2.36793  |  |
| 19641 | Normal colon | PLS3         | 0        | -2.366803 |  |
| 19642 | Normal colon | RGS16        | 0        | -2.362545 |  |
| 19643 | Normal colon | PCSK9        | 0        | -2.346258 |  |
| 19644 | Normal colon | C13orf27     | 0.000057 | -2.341832 |  |
| 19645 | Normal colon | WDR5         | 0        | -2.33504  |  |
| 19646 | Normal colon | ProSAPiP1    | 0        | -2.329098 |  |
| 19647 | Normal colon | DARS2        | 0.003721 | -2.328628 |  |
| 19648 | Normal colon | GPSM2        | 0        | -2.323712 |  |

|       |              |            |          |           |  |
|-------|--------------|------------|----------|-----------|--|
| 19649 | Normal colon | PCID2      | 0        | -2.322111 |  |
| 19650 | Normal colon | HTRA1      | 0        | -2.313181 |  |
| 19651 | Normal colon | GPR160     | 0.025625 | -2.310118 |  |
| 19652 | Normal colon | CCDC16     | 0.019808 | -2.305799 |  |
| 19653 | Normal colon | CBFB       | 0        | -2.28716  |  |
| 19654 | Normal colon | PLAU       | 0        | -2.274784 |  |
| 19655 | Normal colon | COMT       | 0.0087   | -2.27312  |  |
| 19656 | Normal colon | ETS2       | 0.021123 | -2.272741 |  |
| 19657 | Normal colon | CDC16      | 0.036178 | -2.268282 |  |
| 19658 | Normal colon | KIAA0406   | 0        | -2.26134  |  |
| 19659 | Normal colon | S100A11    | 0        | -2.260263 |  |
| 19660 | Normal colon | TMEM206    | 0.000151 | -2.251382 |  |
| 19661 | Normal colon | EXOSC8     | 0.023557 | -2.246594 |  |
| 19662 | Normal colon | CDC25B     | 0        | -2.23736  |  |
| 19663 | Normal colon | CELSR1     | 0        | -2.236188 |  |
| 19664 | Normal colon | RAI14      | 0.000238 | -2.235023 |  |
| 19665 | Normal colon | LIMK1      | 0        | -2.232682 |  |
| 19666 | Normal colon | OLFML2B    | 0        | -2.23075  |  |
| 19667 | Normal colon | IL1RN      | 0        | -2.22198  |  |
| 19668 | Normal colon | EXOSC4     | 0        | -2.219448 |  |
| 19669 | Normal colon | SNX10      | 0        | -2.214407 |  |
| 19670 | Normal colon | MAFG       | 0.020108 | -2.213302 |  |
| 19671 | Normal colon | KCNN4      | 0        | -2.189989 |  |
| 19672 | Normal colon | POFUT1     | 0        | -2.187818 |  |
| 19673 | Normal colon | SFRS3      | 0.023214 | -2.178891 |  |
| 19674 | Normal colon | PRRX1      | 0        | -2.173188 |  |
| 19675 | Normal colon | PLXNA1     | 0        | -2.172769 |  |
| 19676 | Normal colon | LOC90835   | 0.001125 | -2.166442 |  |
| 19677 | Normal colon | ACTR3B     | 0        | -2.164008 |  |
| 19678 | Normal colon | TTC17      | 0.029697 | -2.1624   |  |
| 19679 | Normal colon | C6orf26    | 0        | -2.161049 |  |
| 19680 | Normal colon | EVPL       | 0        | -2.137785 |  |
| 19681 | Normal colon | RIPK2      | 0        | -2.131233 |  |
| 19682 | Normal colon | TPX2       | 0        | -2.124068 |  |
| 19683 | Normal colon | IRF2BP2    | 0.029751 | -2.121326 |  |
| 19684 | Normal colon | CBX8       | 0        | -2.120196 |  |
| 19685 | Normal colon | MORC4      | 0.004279 | -2.112565 |  |
| 19686 | Normal colon | RUNX1      | 0        | -2.112467 |  |
| 19687 | Normal colon | CALU       | 0        | -2.106678 |  |
| 19688 | Normal colon | NOC2L      | 0.026594 | -2.104099 |  |
| 19689 | Normal colon | IGFBP7     | 0        | -2.10232  |  |
| 19690 | Normal colon | DUSP14     | 0        | -2.098726 |  |
| 19691 | Normal colon | NOL8       | 0        | -2.07615  |  |
| 19692 | Normal colon | DCUN1D5    | 0        | -2.073674 |  |
| 19693 | Normal colon | IRAK2      | 0        | -2.070172 |  |
| 19694 | Normal colon | FAM60A     | 0        | -2.066113 |  |
| 19695 | Normal colon | TCFL5      | 0        | -2.061709 |  |
| 19696 | Normal colon | PFDN4      | 0        | -2.052213 |  |
| 19697 | Normal colon | IMPDH1     | 0        | -2.052053 |  |
| 19698 | Normal colon | NOP5/NOP58 | 0        | -2.050744 |  |

|       |              |              |          |           |  |
|-------|--------------|--------------|----------|-----------|--|
| 19699 | Normal colon | SNHG1        | 0        | -2.049278 |  |
| 19700 | Normal colon | NUP107       | 0        | -2.047995 |  |
| 19701 | Normal colon | EEF1E1       | 0        | -2.044514 |  |
| 19702 | Normal colon | FOXM1        | 0        | -2.043947 |  |
| 19703 | Normal colon | POLR2B       | 0.030828 | -2.04259  |  |
| 19704 | Normal colon | STK3         | 0        | -2.036381 |  |
| 19705 | Normal colon | BCL2L1       | 0        | -2.036074 |  |
| 19706 | Normal colon | MIF          | 0        | -2.035911 |  |
| 19707 | Normal colon | NUFIP1       | 0        | -2.035198 |  |
| 19708 | Normal colon | GNL3         | 0        | -2.032758 |  |
| 19709 | Normal colon | RBCK1        | 0        | -2.028985 |  |
| 19710 | Normal colon | C19orf48     | 0        | -2.027782 |  |
| 19711 | Normal colon | TM16F        | 0        | -2.023765 |  |
| 19712 | Normal colon | HM13         | 0        | -2.021461 |  |
| 19713 | Normal colon | STC1         | 0        | -2.018631 |  |
| 19714 | Normal colon | CNIH4        | 0        | -2.006838 |  |
| 19715 | Normal colon | NPM1         | 0        | -2.004808 |  |
| 19716 | Normal colon | LDHA         | 0.020558 | -1.827477 |  |
| 19717 | Normal colon | LASS4        | 0.035981 | 2.000508  |  |
| 19718 | Normal colon | LOC100289019 | 0.000053 | 2.00295   |  |
| 19719 | Normal colon | SGK2         | 0.000043 | 2.008301  |  |
| 19720 | Normal colon | LRRFIP2      | 0.000067 | 2.011938  |  |
| 19721 | Normal colon | MTUS1        | 0.000071 | 2.012135  |  |
| 19722 | Normal colon | CLDN18       | 0.024964 | 2.01326   |  |
| 19723 | Normal colon | ILDR1        | 0        | 2.015816  |  |
| 19724 | Normal colon | ECH1         | 0        | 2.02837   |  |
| 19725 | Normal colon | IMPA2        | 0        | 2.033531  |  |
| 19726 | Normal colon | C22orf16     | 0        | 2.041015  |  |
| 19727 | Normal colon | HIBCH        | 0.000127 | 2.041443  |  |
| 19728 | Normal colon | S100A14      | 0.000183 | 2.042127  |  |
| 19729 | Normal colon | ABHD3        | 0.000238 | 2.042615  |  |
| 19730 | Normal colon | CMAS         | 0.000052 | 2.042658  |  |
| 19731 | Normal colon | BRP44L       | 0.000027 | 2.046297  |  |
| 19732 | Normal colon | PPARGC1A     | 0        | 2.050503  |  |
| 19733 | Normal colon | ECHDC2       | 0.031098 | 2.052193  |  |
| 19734 | Normal colon | BCAR3        | 0.00004  | 2.053906  |  |
| 19735 | Normal colon | FXYD1        | 0.000047 | 2.055213  |  |
| 19736 | Normal colon | MAN2C1       | 0.035766 | 2.05561   |  |
| 19737 | Normal colon | UGP2         | 0.00004  | 2.056388  |  |
| 19738 | Normal colon | SHPK         | 0.000083 | 2.058742  |  |
| 19739 | Normal colon | GIPC1        | 0.040276 | 2.065751  |  |
| 19740 | Normal colon | CD34         | 0.014703 | 2.066563  |  |
| 19741 | Normal colon | ACAT1        | 0.000077 | 2.066848  |  |
| 19742 | Normal colon | ATG4A        | 0.000012 | 2.067547  |  |
| 19743 | Normal colon | CALM1        | 0.00025  | 2.069654  |  |
| 19744 | Normal colon | KRT8         | 0        | 2.070414  |  |
| 19745 | Normal colon | P2RX1        | 0.039725 | 2.07815   |  |
| 19746 | Normal colon | CPT1B        | 0.039004 | 2.086474  |  |
| 19747 | Normal colon | CI152        | 0        | 2.091124  |  |
| 19748 | Normal colon | CASD1        | 0.00029  | 2.091419  |  |

|       |              |           |          |          |  |
|-------|--------------|-----------|----------|----------|--|
| 19749 | Normal colon | PDSS2     | 0.000052 | 2.099445 |  |
| 19750 | Normal colon | PCDHA6    | 0.000109 | 2.10056  |  |
| 19751 | Normal colon | GLCCI1    | 0.000282 | 2.101006 |  |
| 19752 | Normal colon | ATP5S     | 0.000026 | 2.103186 |  |
| 19753 | Normal colon | MRPL35    | 0.000297 | 2.11346  |  |
| 19754 | Normal colon | GLOD5     | 0.000271 | 2.113893 |  |
| 19755 | Normal colon | PLD1      | 0.000135 | 2.115702 |  |
| 19756 | Normal colon | MAP7D3    | 0.028966 | 2.11873  |  |
| 19757 | Normal colon | C14orf159 | 0.000015 | 2.122629 |  |
| 19758 | Normal colon | TNFSF10   | 0        | 2.123927 |  |
| 19759 | Normal colon | PIGR      | 0        | 2.126518 |  |
| 19760 | Normal colon | STAP2     | 0.000189 | 2.132629 |  |
| 19761 | Normal colon | UQCRC1    | 0.000063 | 2.132919 |  |
| 19762 | Normal colon | SLC25A20  | 0.01864  | 2.133911 |  |
| 19763 | Normal colon | CD27      | 0        | 2.134498 |  |
| 19764 | Normal colon | FAM107B   | 0.042246 | 2.138452 |  |
| 19765 | Normal colon | TFG       | 0.014334 | 2.139638 |  |
| 19766 | Normal colon | SPIB      | 0        | 2.141577 |  |
| 19767 | Normal colon | CC50B     | 0        | 2.14326  |  |
| 19768 | Normal colon | TMEM30B   | 0.031638 | 2.151088 |  |
| 19769 | Normal colon | C9orf125  | 0.000112 | 2.151976 |  |
| 19770 | Normal colon | MYO1D     | 0.000211 | 2.153935 |  |
| 19771 | Normal colon | CDS1      | 0.000028 | 2.155889 |  |
| 19772 | Normal colon | MARVELD3  | 0        | 2.156015 |  |
| 19773 | Normal colon | P2RX4     | 0        | 2.1678   |  |
| 19774 | Normal colon | GBA2      | 0.000285 | 2.169336 |  |
| 19775 | Normal colon | ANTXR2    | 0.033986 | 2.172566 |  |
| 19776 | Normal colon | FKBP5     | 0.000164 | 2.181115 |  |
| 19777 | Normal colon | LIMA1     | 0.000009 | 2.19754  |  |
| 19778 | Normal colon | GALM      | 0.000162 | 2.201462 |  |
| 19779 | Normal colon | FZD5      | 0.000266 | 2.202912 |  |
| 19780 | Normal colon | FLJ36848  | 0.000256 | 2.20681  |  |
| 19781 | Normal colon | ANO10     | 0.000053 | 2.207056 |  |
| 19782 | Normal colon | SLC9A3R1  | 0        | 2.208417 |  |
| 19783 | Normal colon | MGC45438  | 0        | 2.209773 |  |
| 19784 | Normal colon | MADCAM1   | 0.020182 | 2.213199 |  |
| 19785 | Normal colon | ATP1B2    | 0.009431 | 2.215758 |  |
| 19786 | Normal colon | C6orf136  | 0.000023 | 2.216746 |  |
| 19787 | Normal colon | ULA4      | 0        | 2.22407  |  |
| 19788 | Normal colon | FAM149A   | 0.000141 | 2.224178 |  |
| 19789 | Normal colon | CASZ1     | 0.022152 | 2.233026 |  |
| 19790 | Normal colon | PEX26     | 0.000241 | 2.233614 |  |
| 19791 | Normal colon | ITGAL     | 0.03857  | 2.238915 |  |
| 19792 | Normal colon | LOC553137 | 0.029803 | 2.241503 |  |
| 19793 | Normal colon | FLNB      | 0.000297 | 2.244974 |  |
| 19794 | Normal colon | L3MBTL4   | 0.040681 | 2.245339 |  |
| 19795 | Normal colon | FAM107A   | 0.000228 | 2.246606 |  |
| 19796 | Normal colon | SHD       | 0.000098 | 2.248522 |  |
| 19797 | Normal colon | PVRL3     | 0.034791 | 2.248662 |  |
| 19798 | Normal colon | SEMA6D    | 0        | 2.250367 |  |

|       |              |              |          |          |  |
|-------|--------------|--------------|----------|----------|--|
| 19799 | Normal colon | PRDX6        | 0.000048 | 2.2515   |  |
| 19800 | Normal colon | LOC92482     | 0.018452 | 2.256469 |  |
| 19801 | Normal colon | KRT19P2      | 0.000135 | 2.260004 |  |
| 19802 | Normal colon | VPS13D       | 0.039004 | 2.263204 |  |
| 19803 | Normal colon | D2HGDH       | 0.03042  | 2.266187 |  |
| 19804 | Normal colon | PCSK7        | 0.018234 | 2.267915 |  |
| 19805 | Normal colon | SLC35D1      | 0.000296 | 2.279274 |  |
| 19806 | Normal colon | GLIPR2       | 0.000116 | 2.281672 |  |
| 19807 | Normal colon | KBTBD11      | 0.000046 | 2.294318 |  |
| 19808 | Normal colon | IDH3A        | 0.000023 | 2.296197 |  |
| 19809 | Normal colon | SLC44A1      | 0.000107 | 2.300155 |  |
| 19810 | Normal colon | LETM1        | 0.000028 | 2.307655 |  |
| 19811 | Normal colon | ALDH6A1      | 0.000229 | 2.310912 |  |
| 19812 | Normal colon | APPL2        | 0.000084 | 2.313575 |  |
| 19813 | Normal colon | SVEP1        | 0.036003 | 2.327369 |  |
| 19814 | Normal colon | TPK1         | 0.028966 | 2.337122 |  |
| 19815 | Normal colon | SHROOM3      | 0.000168 | 2.337508 |  |
| 19816 | Normal colon | CLMN         | 0.000297 | 2.341175 |  |
| 19817 | Normal colon | GLTP         | 0.000012 | 2.341238 |  |
| 19818 | Normal colon | PLCD3        | 0.000143 | 2.342746 |  |
| 19819 | Normal colon | RUNDC3B      | 0.000168 | 2.344697 |  |
| 19820 | Normal colon | USP22        | 0.000098 | 2.348289 |  |
| 19821 | Normal colon | MTM1         | 0.000299 | 2.356838 |  |
| 19822 | Normal colon | FAM82A       | 0.014703 | 2.359803 |  |
| 19823 | Normal colon | LOC100505483 | 0.000238 | 2.372839 |  |
| 19824 | Normal colon | LOC100287411 | 0.00014  | 2.377259 |  |
| 19825 | Normal colon | LOC100289632 | 0.000206 | 2.377517 |  |
| 19826 | Normal colon | FAM47E       | 0.000256 | 2.385583 |  |
| 19827 | Normal colon | EIF4E3       | 0.000052 | 2.389208 |  |
| 19828 | Normal colon | CNNM4        | 0.000074 | 2.390598 |  |
| 19829 | Normal colon | FOXD2        | 0        | 2.393982 |  |
| 19830 | Normal colon | SPPL2A       | 0.000009 | 2.398902 |  |
| 19831 | Normal colon | PGM1         | 0.000017 | 2.39987  |  |
| 19832 | Normal colon | GNA11        | 0.000116 | 2.400654 |  |
| 19833 | Normal colon | BAIAP2L2     | 0.040379 | 2.406717 |  |
| 19834 | Normal colon | C17orf76     | 0.000252 | 2.408479 |  |
| 19835 | Normal colon | SLC39A13     | 0.012324 | 2.413232 |  |
| 19836 | Normal colon | TDP2         | 0.000009 | 2.417162 |  |
| 19837 | Normal colon | SVIL         | 0.039004 | 2.417473 |  |
| 19838 | Normal colon | PAFAH2       | 0        | 2.419754 |  |
| 19839 | Normal colon | FA2H         | 0.000221 | 2.420133 |  |
| 19840 | Normal colon | SEPP1        | 0        | 2.420406 |  |
| 19841 | Normal colon | SAMD13       | 0.000173 | 2.421725 |  |
| 19842 | Normal colon | GOLM1        | 0.000252 | 2.421836 |  |
| 19843 | Normal colon | PTP4A1       | 0.000012 | 2.42263  |  |
| 19844 | Normal colon | ADCY6        | 0.020642 | 2.425586 |  |
| 19845 | Normal colon | FLJ32063     | 0.000136 | 2.428407 |  |
| 19846 | Normal colon | ACOX1        | 0.039431 | 2.429175 |  |
| 19847 | Normal colon | ELOVL6       | 0.000034 | 2.429614 |  |
| 19848 | Normal colon | KIAA0415     | 0.000053 | 2.431677 |  |



|       |              |           |          |          |  |
|-------|--------------|-----------|----------|----------|--|
| 19849 | Normal colon | ASAP3     | 0.000135 | 2.432569 |  |
| 19850 | Normal colon | PPP1R14D  | 0        | 2.453992 |  |
| 19851 | Normal colon | A1CF      | 0.000028 | 2.459517 |  |
| 19852 | Normal colon | HADH      | 0.000053 | 2.460606 |  |
| 19853 | Normal colon | RHOF      | 0.000258 | 2.461934 |  |
| 19854 | Normal colon | LPAR1     | 0.000066 | 2.468301 |  |
| 19855 | Normal colon | PER1      | 0.029825 | 2.474265 |  |
| 19856 | Normal colon | MYOT      | 0.00017  | 2.475259 |  |
| 19857 | Normal colon | RETSAT    | 0.000202 | 2.47862  |  |
| 19858 | Normal colon | SLC41A2   | 0.029803 | 2.482281 |  |
| 19859 | Normal colon | HNRPH1    | 0.039431 | 2.491935 |  |
| 19860 | Normal colon | IGHG1     | 0        | 2.494665 |  |
| 19861 | Normal colon | CLDN7     | 0        | 2.499912 |  |
| 19862 | Normal colon | SGSM3     | 0.018234 | 2.503246 |  |
| 19863 | Normal colon | SULT1A3   | 0.000217 | 2.511955 |  |
| 19864 | Normal colon | SLC39A5   | 0        | 2.514976 |  |
| 19865 | Normal colon | RAP1GAP   | 0        | 2.515    |  |
| 19866 | Normal colon | PRKACB    | 0        | 2.522326 |  |
| 19867 | Normal colon | C2orf72   | 0.000037 | 2.559506 |  |
| 19868 | Normal colon | MIER3     | 0.026637 | 2.565192 |  |
| 19869 | Normal colon | HLA-C     | 0        | 2.567838 |  |
| 19870 | Normal colon | PLXNA2    | 0.035292 | 2.568454 |  |
| 19871 | Normal colon | PECI      | 0.000276 | 2.573106 |  |
| 19872 | Normal colon | UGDH      | 0.000029 | 2.5748   |  |
| 19873 | Normal colon | CCL15     | 0.018452 | 2.585124 |  |
| 19874 | Normal colon | FOXA1     | 0.000292 | 2.593877 |  |
| 19875 | Normal colon | C4orf19   | 0.000122 | 2.613077 |  |
| 19876 | Normal colon | GGA2      | 0.035981 | 2.621938 |  |
| 19877 | Normal colon | KRT24     | 0.000012 | 2.625213 |  |
| 19878 | Normal colon | USP2      | 0.000085 | 2.636411 |  |
| 19879 | Normal colon | NR5A2     | 0.0003   | 2.636983 |  |
| 19880 | Normal colon | FMO5      | 0.000299 | 2.660514 |  |
| 19881 | Normal colon | SRPX      | 0.00029  | 2.663967 |  |
| 19882 | Normal colon | SRI       | 0.018452 | 2.676535 |  |
| 19883 | Normal colon | RBM47     | 0.00004  | 2.686042 |  |
| 19884 | Normal colon | HRBL      | 0.041333 | 2.728359 |  |
| 19885 | Normal colon | TMEM56    | 0.000041 | 2.746816 |  |
| 19886 | Normal colon | ETFDH     | 0.000023 | 2.757237 |  |
| 19887 | Normal colon | TJP3      | 0        | 2.763834 |  |
| 19888 | Normal colon | PPP2R3A   | 0.000074 | 2.772831 |  |
| 19889 | Normal colon | PPID      | 0.000083 | 2.778977 |  |
| 19890 | Normal colon | DSC2      | 0.000053 | 2.779295 |  |
| 19891 | Normal colon | SGK1      | 0.000007 | 2.786882 |  |
| 19892 | Normal colon | MMP28     | 0.000034 | 2.79525  |  |
| 19893 | Normal colon | SLC1A7    | 0.000015 | 2.805395 |  |
| 19894 | Normal colon | LOC400573 | 0.000123 | 2.834344 |  |
| 19895 | Normal colon | CLDN23    | 0.0002   | 2.834475 |  |
| 19896 | Normal colon | BEST2     | 0.04355  | 2.835035 |  |
| 19897 | Normal colon | KRT20     | 0.000255 | 2.836996 |  |
| 19898 | Normal colon | CMBL      | 0        | 2.855768 |  |

|       |              |          |          |          |  |
|-------|--------------|----------|----------|----------|--|
| 19899 | Normal colon | PRKAR2B  | 0.000238 | 2.861024 |  |
| 19900 | Normal colon | MS4A8B   | 0        | 2.868661 |  |
| 19901 | Normal colon | LARP4    | 0.036623 | 2.878931 |  |
| 19902 | Normal colon | CFH      | 0.038575 | 2.879264 |  |
| 19903 | Normal colon | TMEM171  | 0.000043 | 2.885524 |  |
| 19904 | Normal colon | IL10RA   | 0        | 2.903981 |  |
| 19905 | Normal colon | ETHE1    | 0.000003 | 2.915623 |  |
| 19906 | Normal colon | DPF3     | 0.024511 | 2.924453 |  |
| 19907 | Normal colon | MFSD4    | 0.023772 | 2.970282 |  |
| 19908 | Normal colon | PTPRH    | 0        | 2.97681  |  |
| 19909 | Normal colon | DENND2A  | 0.000061 | 2.97707  |  |
| 19910 | Normal colon | FAM46C   | 0.000015 | 2.977186 |  |
| 19911 | Normal colon | TTC23    | 0.000018 | 2.979335 |  |
| 19912 | Normal colon | SULT1A2  | 0.000079 | 2.995262 |  |
| 19913 | Normal colon | EPHX2    | 0        | 3.014573 |  |
| 19914 | Normal colon | AGPAT7   | 0.038656 | 3.02304  |  |
| 19915 | Normal colon | RIPK3    | 0.008025 | 3.029823 |  |
| 19916 | Normal colon | KIF16B   | 0.000012 | 3.030102 |  |
| 19917 | Normal colon | ADH6     | 0.04073  | 3.031853 |  |
| 19918 | Normal colon | ARSF     | 0.035494 | 3.03999  |  |
| 19919 | Normal colon | KLF4     | 0.000031 | 3.042323 |  |
| 19920 | Normal colon | ZZEF1    | 0.000261 | 3.16765  |  |
| 19921 | Normal colon | TNKS2    | 0.014715 | 3.169964 |  |
| 19922 | Normal colon | SYNPO    | 0.018452 | 3.178325 |  |
| 19923 | Normal colon | MTR      | 0.011207 | 3.179868 |  |
| 19924 | Normal colon | PROM2    | 0        | 3.182083 |  |
| 19925 | Normal colon | STMN2    | 0.00025  | 3.185564 |  |
| 19926 | Normal colon | FLJ14213 | 0.02244  | 3.216296 |  |
| 19927 | Normal colon | FABP1    | 0.000007 | 3.261659 |  |
| 19928 | Normal colon | ZBTB7C   | 0.000141 | 3.266716 |  |
| 19929 | Normal colon | DGKA     | 0.017193 | 3.286078 |  |
| 19930 | Normal colon | C2orf88  | 0.000052 | 3.296037 |  |
| 19931 | Normal colon | MGLL     | 0.026227 | 3.304656 |  |
| 19932 | Normal colon | ACADS    | 0        | 3.306832 |  |
| 19933 | Normal colon | ACADVL   | 0.016333 | 3.309393 |  |
| 19934 | Normal colon | AHCYL2   | 0.000007 | 3.330288 |  |
| 19935 | Normal colon | NR3C2    | 0.000074 | 3.350237 |  |
| 19936 | Normal colon | CKMT1A   | 0.000012 | 3.35529  |  |
| 19937 | Normal colon | EYA2     | 0.000292 | 3.360873 |  |
| 19938 | Normal colon | ZNF575   | 0.000035 | 3.378636 |  |
| 19939 | Normal colon | ITPKA    | 0        | 3.397037 |  |
| 19940 | Normal colon | CAMK2D   | 0.017024 | 3.426336 |  |
| 19941 | Normal colon | GIYD2    | 0.029711 | 3.430614 |  |
| 19942 | Normal colon | RDH5     | 0.000083 | 3.450638 |  |
| 19943 | Normal colon | VILL     | 0.000078 | 3.451077 |  |
| 19944 | Normal colon | FAM3D    | 0        | 3.45531  |  |
| 19945 | Normal colon | ASAH1    | 0.032961 | 3.503346 |  |
| 19946 | Normal colon | NAT2     | 0.038865 | 3.513072 |  |
| 19947 | Normal colon | OTC      | 0.039683 | 3.517702 |  |
| 19948 | Normal colon | SULT1B1  | 0.000027 | 3.521881 |  |

|       |              |            |          |          |  |
|-------|--------------|------------|----------|----------|--|
| 19949 | Normal colon | HIGD1A     | 0.000009 | 3.524229 |  |
| 19950 | Normal colon | CAPN9      | 0        | 3.526891 |  |
| 19951 | Normal colon | CES3       | 0.000071 | 3.541904 |  |
| 19952 | Normal colon | GGT6       | 0        | 3.547953 |  |
| 19953 | Normal colon | ITM2C      | 0        | 3.551243 |  |
| 19954 | Normal colon | APBA3      | 0.018234 | 3.602421 |  |
| 19955 | Normal colon | PCK1       | 0.000292 | 3.635801 |  |
| 19956 | Normal colon | CFD        | 0        | 3.644605 |  |
| 19957 | Normal colon | TLN2       | 0.02718  | 3.659044 |  |
| 19958 | Normal colon | ARL14      | 0.000007 | 3.700351 |  |
| 19959 | Normal colon | ABCA8      | 0.000244 | 3.701992 |  |
| 19960 | Normal colon | SLCO2A1    | 0.033834 | 3.702843 |  |
| 19961 | Normal colon | ACAA2      | 0.010089 | 3.766697 |  |
| 19962 | Normal colon | PLA2G10    | 0        | 3.810911 |  |
| 19963 | Normal colon | SCIN       | 0.000238 | 3.855473 |  |
| 19964 | Normal colon | PLCL2      | 0.036003 | 3.886128 |  |
| 19965 | Normal colon | IGHA1      | 0        | 3.894704 |  |
| 19966 | Normal colon | CXorf30    | 0.029697 | 3.899349 |  |
| 19967 | Normal colon | DNALI1     | 0.01888  | 3.904849 |  |
| 19968 | Normal colon | RICH2      | 0        | 3.92115  |  |
| 19969 | Normal colon | MOGAT2     | 0.000064 | 3.948991 |  |
| 19970 | Normal colon | PDK4       | 0.009431 | 3.957255 |  |
| 19971 | Normal colon | LRRC19     | 0.000069 | 4.006808 |  |
| 19972 | Normal colon | ARHGAP44   | 0.000252 | 4.0241   |  |
| 19973 | Normal colon | AGPAT9     | 0.000063 | 4.032915 |  |
| 19974 | Normal colon | ST6GALNAC1 | 0        | 4.044724 |  |
| 19975 | Normal colon | CCL14      | 0.029803 | 4.046945 |  |
| 19976 | Normal colon | ABCC3      | 0.017251 | 4.098417 |  |
| 19977 | Normal colon | UGT2B15    | 0.000038 | 4.136587 |  |
| 19978 | Normal colon | CCL23      | 0.014703 | 4.24844  |  |
| 19979 | Normal colon | HMCN2      | 0.035016 | 4.259842 |  |
| 19980 | Normal colon | SLIT3      | 0.028203 | 4.271669 |  |
| 19981 | Normal colon | DHR11      | 0        | 4.335302 |  |
| 19982 | Normal colon | CWH43      | 0.000237 | 4.42692  |  |
| 19983 | Normal colon | RCAN2      | 0.01354  | 4.456363 |  |
| 19984 | Normal colon | FBLN1      | 0.041341 | 4.492027 |  |
| 19985 | Normal colon | DHRS11     | 0.000021 | 4.552529 |  |
| 19986 | Normal colon | SAHH3      | 0        | 4.632689 |  |
| 19987 | Normal colon | SMPDL3A    | 0.028512 | 4.656029 |  |
| 19988 | Normal colon | GCNT2      | 0.000098 | 4.728089 |  |
| 19989 | Normal colon | DNASE1L3   | 0        | 4.733923 |  |
| 19990 | Normal colon | LYVE1      | 0.04014  | 5.072159 |  |
| 19991 | Normal colon | CDKN2B     | 0        | 5.110098 |  |
| 19992 | Normal colon | PLCD1      | 0.024043 | 5.270598 |  |
| 19993 | Normal colon | C14orf176  | 0.028966 | 5.297335 |  |
| 19994 | Normal colon | IL1R2      | 0.000052 | 5.493194 |  |
| 19995 | Normal colon | TMEM37     | 0.02234  | 5.658031 |  |
| 19996 | Normal colon | SCNN1A     | 0.018452 | 5.663262 |  |
| 19997 | Normal colon | ST6GALNAC6 | 0.039683 | 5.667975 |  |
| 19998 | Normal colon | GREM2      | 0.026621 | 5.752544 |  |

|       |                          |           |          |            |  |
|-------|--------------------------|-----------|----------|------------|--|
| 19999 | Normal colon             | MUC5B     | 0.016333 | 5.913723   |  |
| 20000 | Normal colon             | SEMA6A    | 0        | 6.067993   |  |
| 20001 | Normal colon             | PKIB      | 0.000009 | 6.113732   |  |
| 20002 | Normal colon             | DHRS9     | 0.000007 | 6.14952    |  |
| 20003 | Normal colon             | WDR78     | 0.033986 | 6.221949   |  |
| 20004 | Normal colon             | TEX11     | 0.026101 | 6.407819   |  |
| 20005 | Normal colon             | ITLN1     | 0        | 6.492572   |  |
| 20006 | Normal colon             | ABCG2     | 0.000246 | 6.568358   |  |
| 20007 | Normal colon             | VIPR1     | 0.020108 | 6.60046    |  |
| 20008 | Normal colon             | SELENBP1  | 0        | 6.712648   |  |
| 20009 | Normal colon             | LOC388335 | 0.010896 | 6.811472   |  |
| 20010 | Normal colon             | MARCKSL1  | 0.024437 | 7.3093     |  |
| 20011 | Normal colon             | AKR1B10   | 0.00018  | 7.408942   |  |
| 20012 | Normal colon             | PYY       | 0        | 7.447677   |  |
| 20013 | Normal colon             | CLCA1     | 0        | 7.773476   |  |
| 20014 | Normal colon             | JAK1      | 0.023672 | 7.942721   |  |
| 20015 | Normal colon             | SCNN1B    | 0.006411 | 8.610319   |  |
| 20016 | Normal colon             | MGC13057  | 0.017251 | 9.326053   |  |
| 20017 | Normal colon             | C6orf105  | 0        | 10.406819  |  |
| 20018 | Normal colon             | ADAMDEC1  | 0        | 11.367719  |  |
| 20019 | Normal colon             | MAPK8     | 0.029803 | 12.237187  |  |
| 20020 | Normal colon             | CLCA4     | 0        | 13.635842  |  |
| 20021 | Normal colon             | MT1H      | 0.040019 | 14.19686   |  |
| 20022 | Normal colon             | MT1M      | 0.036178 | 15.982265  |  |
| 20023 | Normal colon             | AQP8      | 0        | 22.472268  |  |
| 20024 | Normal colon             | SLC17A4   | 0.018452 | 25.321074  |  |
| 20025 | Normal colon             | MUC2      | 0.036586 | 26.629129  |  |
| 20026 | Normal colon             | CHGA      | 0.038865 | 27.658161  |  |
| 20027 | Normal colon             | GUCA2B    | 0.005607 | 43.926917  |  |
| 20028 | Normal rectum            | DLGAP4    | 0.009754 | 2.082438   |  |
| 20029 | Normal tissue morphology | AQP8      | 0        | -44.069335 |  |
| 20030 | Normal tissue morphology | CA1       | 0        | -36.110772 |  |
| 20031 | Normal tissue morphology | CLCA4     | 0        | -31.629654 |  |
| 20032 | Normal tissue morphology | GUCA2A    | 0        | -26.964687 |  |
| 20033 | Normal tissue morphology | GUCA2B    | 0        | -24.924778 |  |
| 20034 | Normal tissue morphology | CA4       | 0        | -18.548553 |  |
| 20035 | Normal tissue morphology | MS4A12    | 0        | -17.955812 |  |
| 20036 | Normal tissue morphology | ADH1A     | 0        | -11.751594 |  |
| 20037 | Normal tissue morphology | TMIGD     | 0        | -10.791315 |  |
| 20038 | Normal tissue morphology | LOC63928  | 0        | -8.915585  |  |
| 20039 | Normal tissue morphology | MT1M      | 0        | -8.12885   |  |
| 20040 | Normal tissue morphology | CFD       | 0        | -7.915842  |  |
| 20041 | Normal tissue morphology | MAMDC2    | 0        | -7.045446  |  |
| 20042 | Normal tissue morphology | SFRP1     | 0        | -6.684432  |  |
| 20043 | Normal tissue morphology | OSTbeta   | 0        | -6.304743  |  |
| 20044 | Normal tissue morphology | SCARA5    | 0        | -6.298371  |  |
| 20045 | Normal tissue morphology | HSD11B2   | 0        | -6.08248   |  |
| 20046 | Normal tissue morphology | CXCL12    | 0        | -5.943106  |  |
| 20047 | Normal tissue morphology | HMMR      | 0.000025 | -5.804377  |  |
| 20048 | Normal tissue morphology | VMD2L1    | 0        | -5.755075  |  |

|       |                          |           |          |           |  |
|-------|--------------------------|-----------|----------|-----------|--|
| 20049 | Normal tissue morphology | PI16      | 0        | -5.715154 |  |
| 20050 | Normal tissue morphology | KIF20A    | 0.000391 | -5.468525 |  |
| 20051 | Normal tissue morphology | VMD2L2    | 0        | -5.32281  |  |
| 20052 | Normal tissue morphology | PCOLCE2   | 0        | -5.114989 |  |
| 20053 | Normal tissue morphology | UGT1A10   | 0        | -4.847321 |  |
| 20054 | Normal tissue morphology | SLC16A9   | 0        | -4.611893 |  |
| 20055 | Normal tissue morphology | VIP       | 0        | -4.583618 |  |
| 20056 | Normal tissue morphology | LOC340843 | 0        | -4.503637 |  |
| 20057 | Normal tissue morphology | PLAC9     | 0        | -4.463959 |  |
| 20058 | Normal tissue morphology | PDK4      | 0        | -4.232559 |  |
| 20059 | Normal tissue morphology | PRPH      | 0        | -4.228059 |  |
| 20060 | Normal tissue morphology | KIAA0828  | 0        | -4.161943 |  |
| 20061 | Normal tissue morphology | LOC441282 | 0        | -4.058839 |  |
| 20062 | Normal tissue morphology | XPOT      | 0.014459 | -3.992622 |  |
| 20063 | Normal tissue morphology | MATN2     | 0        | -3.91557  |  |
| 20064 | Normal tissue morphology | E2F5      | 0.005272 | -3.890783 |  |
| 20065 | Normal tissue morphology | CCDC86    | 0.002201 | -3.867938 |  |
| 20066 | Normal tissue morphology | RELL2     | 0.003759 | -3.855649 |  |
| 20067 | Normal tissue morphology | B3GALTL   | 0.049356 | -3.840546 |  |
| 20068 | Normal tissue morphology | GPX3      | 0        | -3.748229 |  |
| 20069 | Normal tissue morphology | WDSOF1    | 0.001352 | -3.709982 |  |
| 20070 | Normal tissue morphology | SNTB1     | 0.000297 | -3.60564  |  |
| 20071 | Normal tissue morphology | CDC6      | 0.011855 | -3.551337 |  |
| 20072 | Normal tissue morphology | PPM1H     | 0.000249 | -3.479492 |  |
| 20073 | Normal tissue morphology | OTOP2     | 0        | -3.429898 |  |
| 20074 | Normal tissue morphology | PTP4A3    | 0.000168 | -3.409801 |  |
| 20075 | Normal tissue morphology | MAL       | 0        | -3.354032 |  |
| 20076 | Normal tissue morphology | FANCI     | 0.0087   | -3.309157 |  |
| 20077 | Normal tissue morphology | BUB1      | 0.003759 | -3.279526 |  |
| 20078 | Normal tissue morphology | C13orf3   | 0.010117 | -3.221261 |  |
| 20079 | Normal tissue morphology | GPM6B     | 0        | -3.220923 |  |
| 20080 | Normal tissue morphology | SLC1A5    | 0        | -3.204578 |  |
| 20081 | Normal tissue morphology | CNTFR     | 0        | -3.157038 |  |
| 20082 | Normal tissue morphology | XKR4      | 0        | -3.097864 |  |
| 20083 | Normal tissue morphology | KCNIP4    | 0        | -3.090417 |  |
| 20084 | Normal tissue morphology | HMFN0839  | 0        | -3.055462 |  |
| 20085 | Normal tissue morphology | C8ORF30A  | 0        | -3.037225 |  |
| 20086 | Normal tissue morphology | OGN       | 0        | -3.035103 |  |
| 20087 | Normal tissue morphology | GREM2     | 0        | -3.005481 |  |
| 20088 | Normal tissue morphology | ABI3BP    | 0        | -3.004368 |  |
| 20089 | Normal tissue morphology | SLC25A34  | 0        | -2.894841 |  |
| 20090 | Normal tissue morphology | MCM8      | 0.004563 | -2.888232 |  |
| 20091 | Normal tissue morphology | COL1A1    | 0.000263 | -2.887807 |  |
| 20092 | Normal tissue morphology | EDG2      | 0        | -2.8128   |  |
| 20093 | Normal tissue morphology | LOC285016 | 0        | -2.803106 |  |
| 20094 | Normal tissue morphology | HTR4      | 0        | -2.796495 |  |
| 20095 | Normal tissue morphology | LOC731049 | 0        | -2.775363 |  |
| 20096 | Normal tissue morphology | EPB41L3   | 0        | -2.762123 |  |
| 20097 | Normal tissue morphology | SLC5A6    | 0        | -2.75067  |  |
| 20098 | Normal tissue morphology | PLCD1     | 0        | -2.749102 |  |

|       |                          |           |          |           |  |
|-------|--------------------------|-----------|----------|-----------|--|
| 20099 | Normal tissue morphology | TNFRSF10B | 0        | -2.747858 |  |
| 20100 | Normal tissue morphology | HIG2      | 0        | -2.736757 |  |
| 20101 | Normal tissue morphology | CLIC3     | 0.000063 | -2.704234 |  |
| 20102 | Normal tissue morphology | CCND1     | 0        | -2.692153 |  |
| 20103 | Normal tissue morphology | PHLPPL    | 0        | -2.688005 |  |
| 20104 | Normal tissue morphology | ASAH1     | 0        | -2.687594 |  |
| 20105 | Normal tissue morphology | ZNHIT4    | 0        | -2.684367 |  |
| 20106 | Normal tissue morphology | FASN      | 0        | -2.627448 |  |
| 20107 | Normal tissue morphology | IMPDH1    | 0        | -2.626598 |  |
| 20108 | Normal tissue morphology | UBE2V1    | 0.004279 | -2.625998 |  |
| 20109 | Normal tissue morphology | MGC4308   | 0.000012 | -2.624252 |  |
| 20110 | Normal tissue morphology | TMEM97    | 0        | -2.606366 |  |
| 20111 | Normal tissue morphology | SLC7A1    | 0        | -2.593797 |  |
| 20112 | Normal tissue morphology | FUCA1     | 0        | -2.564942 |  |
| 20113 | Normal tissue morphology | LOC643940 | 0        | -2.564427 |  |
| 20114 | Normal tissue morphology | PDE9A     | 0        | -2.559518 |  |
| 20115 | Normal tissue morphology | PAQR5     | 0        | -2.542337 |  |
| 20116 | Normal tissue morphology | SLC7A6    | 0.005899 | -2.538138 |  |
| 20117 | Normal tissue morphology | TMEM100   | 0        | -2.527418 |  |
| 20118 | Normal tissue morphology | LOC388796 | 0.000056 | -2.525723 |  |
| 20119 | Normal tissue morphology | AMIGO2    | 0.000027 | -2.510275 |  |
| 20120 | Normal tissue morphology | RUNX1     | 0        | -2.507444 |  |
| 20121 | Normal tissue morphology | RPL35A    | 0.023557 | -2.488761 |  |
| 20122 | Normal tissue morphology | DACH1     | 0        | -2.479156 |  |
| 20123 | Normal tissue morphology | KPNA2     | 0        | -2.47461  |  |
| 20124 | Normal tissue morphology | CBX2      | 0.000072 | -2.45772  |  |
| 20125 | Normal tissue morphology | FOXN2     | 0        | -2.456034 |  |
| 20126 | Normal tissue morphology | TOP1MT    | 0.000095 | -2.441191 |  |
| 20127 | Normal tissue morphology | CSPP1     | 0.004279 | -2.417897 |  |
| 20128 | Normal tissue morphology | TNFRSF11B | 0.000263 | -2.412846 |  |
| 20129 | Normal tissue morphology | IRAK2     | 0        | -2.400199 |  |
| 20130 | Normal tissue morphology | TCF21     | 0        | -2.391464 |  |
| 20131 | Normal tissue morphology | JAG2      | 0.000098 | -2.357991 |  |
| 20132 | Normal tissue morphology | DKC1      | 0        | -2.357733 |  |
| 20133 | Normal tissue morphology | FKBP4     | 0        | -2.352568 |  |
| 20134 | Normal tissue morphology | CBFB      | 0        | -2.344402 |  |
| 20135 | Normal tissue morphology | C13orf27  | 0.000057 | -2.341832 |  |
| 20136 | Normal tissue morphology | PMP2      | 0        | -2.341572 |  |
| 20137 | Normal tissue morphology | DARS2     | 0.003721 | -2.328628 |  |
| 20138 | Normal tissue morphology | POLR1C    | 0        | -2.325351 |  |
| 20139 | Normal tissue morphology | DTD1      | 0        | -2.323472 |  |
| 20140 | Normal tissue morphology | MYC       | 0.000043 | -2.32116  |  |
| 20141 | Normal tissue morphology | BOP1      | 0        | -2.317033 |  |
| 20142 | Normal tissue morphology | LGI1      | 0        | -2.314818 |  |
| 20143 | Normal tissue morphology | NKX2-3    | 0        | -2.302686 |  |
| 20144 | Normal tissue morphology | AKAP7     | 0        | -2.2988   |  |
| 20145 | Normal tissue morphology | ALDH4A1   | 0        | -2.292465 |  |
| 20146 | Normal tissue morphology | KIF5C     | 0        | -2.283957 |  |
| 20147 | Normal tissue morphology | NOL6      | 0        | -2.279329 |  |
| 20148 | Normal tissue morphology | C7ORF47   | 0        | -2.277622 |  |

|       |                          |           |          |           |  |
|-------|--------------------------|-----------|----------|-----------|--|
| 20149 | Normal tissue morphology | COMT      | 0.0087   | -2.27312  |  |
| 20150 | Normal tissue morphology | TMEFF2    | 0        | -2.267269 |  |
| 20151 | Normal tissue morphology | RPIB9     | 0        | -2.251726 |  |
| 20152 | Normal tissue morphology | TMEM206   | 0.000151 | -2.251382 |  |
| 20153 | Normal tissue morphology | RBM15     | 0        | -2.250458 |  |
| 20154 | Normal tissue morphology | CYB5R2    | 0        | -2.247061 |  |
| 20155 | Normal tissue morphology | EXOSC8    | 0.023557 | -2.246594 |  |
| 20156 | Normal tissue morphology | RAI14     | 0.000238 | -2.235023 |  |
| 20157 | Normal tissue morphology | MCM2      | 0        | -2.216769 |  |
| 20158 | Normal tissue morphology | U2AF2     | 0        | -2.209129 |  |
| 20159 | Normal tissue morphology | TNFRSF13B | 0        | -2.195702 |  |
| 20160 | Normal tissue morphology | CCDC113   | 0        | -2.192512 |  |
| 20161 | Normal tissue morphology | SFRS3     | 0.023214 | -2.178891 |  |
| 20162 | Normal tissue morphology | ZMIZ2     | 0        | -2.174462 |  |
| 20163 | Normal tissue morphology | TDP1      | 0        | -2.17419  |  |
| 20164 | Normal tissue morphology | AFF3      | 0        | -2.168501 |  |
| 20165 | Normal tissue morphology | LOC90835  | 0.001125 | -2.166442 |  |
| 20166 | Normal tissue morphology | STOX2     | 0        | -2.16469  |  |
| 20167 | Normal tissue morphology | TBC1D16   | 0        | -2.152824 |  |
| 20168 | Normal tissue morphology | NAT10     | 0        | -2.14404  |  |
| 20169 | Normal tissue morphology | C20ORF198 | 0        | -2.140572 |  |
| 20170 | Normal tissue morphology | SLC12A2   | 0.000235 | -2.139849 |  |
| 20171 | Normal tissue morphology | TPD52L2   | 0.000076 | -2.120266 |  |
| 20172 | Normal tissue morphology | HPCAL1    | 0        | -2.119658 |  |
| 20173 | Normal tissue morphology | TP53INP2  | 0        | -2.11798  |  |
| 20174 | Normal tissue morphology | PPARGC1B  | 0        | -2.109637 |  |
| 20175 | Normal tissue morphology | TRPC4AP   | 0        | -2.107255 |  |
| 20176 | Normal tissue morphology | NOC2L     | 0.026594 | -2.104099 |  |
| 20177 | Normal tissue morphology | TUT1      | 0        | -2.102384 |  |
| 20178 | Normal tissue morphology | FLJ10826  | 0.000009 | -2.102346 |  |
| 20179 | Normal tissue morphology | SF3B3     | 0        | -2.100833 |  |
| 20180 | Normal tissue morphology | RAVER2    | 0        | -2.08924  |  |
| 20181 | Normal tissue morphology | TUBA4A    | 0        | -2.088663 |  |
| 20182 | Normal tissue morphology | WISP2     | 0        | -2.08814  |  |
| 20183 | Normal tissue morphology | MET       | 0        | -2.088048 |  |
| 20184 | Normal tissue morphology | RPUSD4    | 0        | -2.084899 |  |
| 20185 | Normal tissue morphology | CITED2    | 0        | -2.074953 |  |
| 20186 | Normal tissue morphology | CCNB1IP1  | 0        | -2.074775 |  |
| 20187 | Normal tissue morphology | SNX5      | 0        | -2.066829 |  |
| 20188 | Normal tissue morphology | CCNF      | 0        | -2.066788 |  |
| 20189 | Normal tissue morphology | HEATR2    | 0        | -2.058055 |  |
| 20190 | Normal tissue morphology | NFXL1     | 0        | -2.053474 |  |
| 20191 | Normal tissue morphology | GTPBP4    | 0        | -2.049344 |  |
| 20192 | Normal tissue morphology | ABCB6     | 0        | -2.043855 |  |
| 20193 | Normal tissue morphology | PLP1      | 0        | -2.034127 |  |
| 20194 | Normal tissue morphology | MIF       | 0        | -2.034082 |  |
| 20195 | Normal tissue morphology | CCBP2     | 0        | -2.027799 |  |
| 20196 | Normal tissue morphology | SLC25A22  | 0        | -2.020754 |  |
| 20197 | Normal tissue morphology | TCERG1    | 0.045229 | -1.530054 |  |
| 20198 | Normal tissue morphology | CTNND1    | 0.000001 | 2.001972  |  |

|       |                          |              |          |          |  |
|-------|--------------------------|--------------|----------|----------|--|
| 20199 | Normal tissue morphology | LOC100289019 | 0.000053 | 2.00295  |  |
| 20200 | Normal tissue morphology | BDH1         | 0.00027  | 2.003198 |  |
| 20201 | Normal tissue morphology | BAD          | 0        | 2.004266 |  |
| 20202 | Normal tissue morphology | PCSK1N       | 0.000002 | 2.008034 |  |
| 20203 | Normal tissue morphology | SGK2         | 0.000043 | 2.008301 |  |
| 20204 | Normal tissue morphology | LRRFIP2      | 0.000067 | 2.011938 |  |
| 20205 | Normal tissue morphology | MTUS1        | 0.000071 | 2.012135 |  |
| 20206 | Normal tissue morphology | C10ORF26     | 0        | 2.013443 |  |
| 20207 | Normal tissue morphology | POLD4        | 0.000002 | 2.014145 |  |
| 20208 | Normal tissue morphology | FJX1         | 0        | 2.028496 |  |
| 20209 | Normal tissue morphology | CAPN5        | 0.000138 | 2.031624 |  |
| 20210 | Normal tissue morphology | CDC2L1       | 0        | 2.032829 |  |
| 20211 | Normal tissue morphology | CLTB         | 0.000008 | 2.034168 |  |
| 20212 | Normal tissue morphology | SYTL4        | 0.000002 | 2.034218 |  |
| 20213 | Normal tissue morphology | S100A10      | 0.000004 | 2.036907 |  |
| 20214 | Normal tissue morphology | HIBCH        | 0.000127 | 2.041443 |  |
| 20215 | Normal tissue morphology | S100A14      | 0.000183 | 2.042127 |  |
| 20216 | Normal tissue morphology | CMAS         | 0.000052 | 2.042658 |  |
| 20217 | Normal tissue morphology | C14ORF147    | 0        | 2.045618 |  |
| 20218 | Normal tissue morphology | FXYD1        | 0.000047 | 2.055213 |  |
| 20219 | Normal tissue morphology | SHPK         | 0.000083 | 2.058742 |  |
| 20220 | Normal tissue morphology | TFCP2L1      | 0.000006 | 2.064292 |  |
| 20221 | Normal tissue morphology | ACAT1        | 0.000077 | 2.066848 |  |
| 20222 | Normal tissue morphology | ATG4A        | 0.000012 | 2.067547 |  |
| 20223 | Normal tissue morphology | TP53I3       | 0.000116 | 2.067676 |  |
| 20224 | Normal tissue morphology | PLXNA2       | 0.000002 | 2.068311 |  |
| 20225 | Normal tissue morphology | CALM1        | 0.00025  | 2.069654 |  |
| 20226 | Normal tissue morphology | NAALADL1     | 0        | 2.069962 |  |
| 20227 | Normal tissue morphology | MGLL         | 0.000004 | 2.073045 |  |
| 20228 | Normal tissue morphology | VAMP8        | 0.000007 | 2.083103 |  |
| 20229 | Normal tissue morphology | MEF2D        | 0        | 2.087322 |  |
| 20230 | Normal tissue morphology | CASD1        | 0.00029  | 2.091419 |  |
| 20231 | Normal tissue morphology | FLJ12610     | 0.000009 | 2.095074 |  |
| 20232 | Normal tissue morphology | PDSS2        | 0.000052 | 2.099445 |  |
| 20233 | Normal tissue morphology | PCDHA6       | 0.000109 | 2.10056  |  |
| 20234 | Normal tissue morphology | GLCCI1       | 0.000282 | 2.101006 |  |
| 20235 | Normal tissue morphology | ShrmL        | 0.00001  | 2.101674 |  |
| 20236 | Normal tissue morphology | ATP5S        | 0.000026 | 2.103186 |  |
| 20237 | Normal tissue morphology | CHP          | 0.000003 | 2.107398 |  |
| 20238 | Normal tissue morphology | MRPL35       | 0.000297 | 2.11346  |  |
| 20239 | Normal tissue morphology | GLOD5        | 0.000271 | 2.113893 |  |
| 20240 | Normal tissue morphology | C1ORF108     | 0        | 2.115181 |  |
| 20241 | Normal tissue morphology | PLD1         | 0.000135 | 2.115702 |  |
| 20242 | Normal tissue morphology | PPP1CB       | 0        | 2.116879 |  |
| 20243 | Normal tissue morphology | C14orf159    | 0.000015 | 2.122629 |  |
| 20244 | Normal tissue morphology | PAQR8        | 0.000098 | 2.124901 |  |
| 20245 | Normal tissue morphology | UQCRC1       | 0.000063 | 2.132919 |  |
| 20246 | Normal tissue morphology | STXBP3       | 0        | 2.133796 |  |
| 20247 | Normal tissue morphology | RIPK2        | 0        | 2.137108 |  |
| 20248 | Normal tissue morphology | C9orf125     | 0.000112 | 2.151976 |  |



|       |                          |              |          |          |  |
|-------|--------------------------|--------------|----------|----------|--|
| 20249 | Normal tissue morphology | MYO1D        | 0.000211 | 2.153935 |  |
| 20250 | Normal tissue morphology | MXD1         | 0.000104 | 2.154847 |  |
| 20251 | Normal tissue morphology | PTK6         | 0.000009 | 2.155801 |  |
| 20252 | Normal tissue morphology | CDS1         | 0.000028 | 2.155889 |  |
| 20253 | Normal tissue morphology | ORF1-FL49    | 0.000001 | 2.166765 |  |
| 20254 | Normal tissue morphology | GBA2         | 0.000285 | 2.169336 |  |
| 20255 | Normal tissue morphology | FKBP5        | 0.000164 | 2.181115 |  |
| 20256 | Normal tissue morphology | OSBPL7       | 0.000066 | 2.183997 |  |
| 20257 | Normal tissue morphology | GALIG        | 0        | 2.192145 |  |
| 20258 | Normal tissue morphology | SLC35A3      | 0.000006 | 2.193479 |  |
| 20259 | Normal tissue morphology | LIMA1        | 0.000009 | 2.19754  |  |
| 20260 | Normal tissue morphology | GALM         | 0.000162 | 2.201462 |  |
| 20261 | Normal tissue morphology | FZD5         | 0.000266 | 2.202912 |  |
| 20262 | Normal tissue morphology | FLJ36848     | 0.000256 | 2.20681  |  |
| 20263 | Normal tissue morphology | ANO10        | 0.000053 | 2.207056 |  |
| 20264 | Normal tissue morphology | WISP1        | 0        | 2.212239 |  |
| 20265 | Normal tissue morphology | C6orf136     | 0.000023 | 2.216746 |  |
| 20266 | Normal tissue morphology | FAM149A      | 0.000141 | 2.224178 |  |
| 20267 | Normal tissue morphology | CAS1         | 0        | 2.229294 |  |
| 20268 | Normal tissue morphology | LGMN         | 0        | 2.231319 |  |
| 20269 | Normal tissue morphology | PEX26        | 0.000241 | 2.233614 |  |
| 20270 | Normal tissue morphology | FLNB         | 0.000297 | 2.244974 |  |
| 20271 | Normal tissue morphology | SHD          | 0.000098 | 2.248522 |  |
| 20272 | Normal tissue morphology | RHBDF2       | 0        | 2.25911  |  |
| 20273 | Normal tissue morphology | KRT19P2      | 0.000135 | 2.260004 |  |
| 20274 | Normal tissue morphology | FLJ14981     | 0.000001 | 2.278628 |  |
| 20275 | Normal tissue morphology | SLC35D1      | 0.000296 | 2.279274 |  |
| 20276 | Normal tissue morphology | GLIPR2       | 0.000116 | 2.281672 |  |
| 20277 | Normal tissue morphology | KBTBD11      | 0.000046 | 2.294318 |  |
| 20278 | Normal tissue morphology | IDH3A        | 0.000023 | 2.296197 |  |
| 20279 | Normal tissue morphology | SH3BGRL2     | 0.000004 | 2.297834 |  |
| 20280 | Normal tissue morphology | SLC44A1      | 0.000107 | 2.300155 |  |
| 20281 | Normal tissue morphology | LETM1        | 0.000028 | 2.307655 |  |
| 20282 | Normal tissue morphology | ALDH6A1      | 0.000229 | 2.310912 |  |
| 20283 | Normal tissue morphology | SYTL2        | 0.000012 | 2.312394 |  |
| 20284 | Normal tissue morphology | APPL2        | 0.000084 | 2.313575 |  |
| 20285 | Normal tissue morphology | TRPM4        | 0.000006 | 2.333557 |  |
| 20286 | Normal tissue morphology | SHROOM3      | 0.000168 | 2.337508 |  |
| 20287 | Normal tissue morphology | RUNDC3B      | 0.000168 | 2.344697 |  |
| 20288 | Normal tissue morphology | USP22        | 0.000098 | 2.348289 |  |
| 20289 | Normal tissue morphology | PCSK6        | 0.000006 | 2.366172 |  |
| 20290 | Normal tissue morphology | MTHFD1L      | 0        | 2.368066 |  |
| 20291 | Normal tissue morphology | CYCS         | 0        | 2.369188 |  |
| 20292 | Normal tissue morphology | LOC100505483 | 0.000238 | 2.372839 |  |
| 20293 | Normal tissue morphology | NDUFS4       | 0        | 2.374655 |  |
| 20294 | Normal tissue morphology | LOC100287411 | 0.00014  | 2.377259 |  |
| 20295 | Normal tissue morphology | LOC100289632 | 0.000206 | 2.377517 |  |
| 20296 | Normal tissue morphology | FAM47E       | 0.000256 | 2.385583 |  |
| 20297 | Normal tissue morphology | EIF4E3       | 0.000052 | 2.389208 |  |
| 20298 | Normal tissue morphology | CNNM4        | 0.000074 | 2.390598 |  |

|       |                          |           |          |          |  |
|-------|--------------------------|-----------|----------|----------|--|
| 20299 | Normal tissue morphology | MGST3     | 0        | 2.39558  |  |
| 20300 | Normal tissue morphology | SPPL2A    | 0.000009 | 2.398902 |  |
| 20301 | Normal tissue morphology | PGM1      | 0.000017 | 2.39987  |  |
| 20302 | Normal tissue morphology | MDH1      | 0        | 2.400904 |  |
| 20303 | Normal tissue morphology | FBXO3     | 0        | 2.403039 |  |
| 20304 | Normal tissue morphology | C17orf76  | 0.000252 | 2.408479 |  |
| 20305 | Normal tissue morphology | TDP2      | 0.000009 | 2.417162 |  |
| 20306 | Normal tissue morphology | FA2H      | 0.000221 | 2.420133 |  |
| 20307 | Normal tissue morphology | SAMD13    | 0.000173 | 2.421725 |  |
| 20308 | Normal tissue morphology | GOLM1     | 0.000252 | 2.421836 |  |
| 20309 | Normal tissue morphology | PTP4A1    | 0.000012 | 2.42263  |  |
| 20310 | Normal tissue morphology | ELOVL6    | 0.000034 | 2.429614 |  |
| 20311 | Normal tissue morphology | KIAA0415  | 0.000053 | 2.431677 |  |
| 20312 | Normal tissue morphology | ASAP3     | 0.000135 | 2.432569 |  |
| 20313 | Normal tissue morphology | CRK       | 0        | 2.453192 |  |
| 20314 | Normal tissue morphology | A1CF      | 0.000028 | 2.459517 |  |
| 20315 | Normal tissue morphology | HADH      | 0.000053 | 2.460606 |  |
| 20316 | Normal tissue morphology | RHOF      | 0.000258 | 2.461934 |  |
| 20317 | Normal tissue morphology | LPAR1     | 0.000066 | 2.468301 |  |
| 20318 | Normal tissue morphology | CRYZL1    | 0        | 2.474973 |  |
| 20319 | Normal tissue morphology | MYO1C     | 0        | 2.479873 |  |
| 20320 | Normal tissue morphology | FLJ20273  | 0.000008 | 2.483385 |  |
| 20321 | Normal tissue morphology | SULT1A3   | 0.000217 | 2.511955 |  |
| 20322 | Normal tissue morphology | LOC201895 | 0.000001 | 2.520197 |  |
| 20323 | Normal tissue morphology | TDE2L     | 0.000006 | 2.522827 |  |
| 20324 | Normal tissue morphology | NANS      | 0.000001 | 2.539289 |  |
| 20325 | Normal tissue morphology | TCEA3     | 0.000297 | 2.544402 |  |
| 20326 | Normal tissue morphology | FXYD5     | 0        | 2.548632 |  |
| 20327 | Normal tissue morphology | C2orf72   | 0.000037 | 2.559506 |  |
| 20328 | Normal tissue morphology | CKMT1     | 0.000013 | 2.56467  |  |
| 20329 | Normal tissue morphology | PECI      | 0.000276 | 2.573106 |  |
| 20330 | Normal tissue morphology | BMP2      | 0.000162 | 2.579571 |  |
| 20331 | Normal tissue morphology | FMO4      | 0.000009 | 2.582345 |  |
| 20332 | Normal tissue morphology | FOXA1     | 0.000292 | 2.593877 |  |
| 20333 | Normal tissue morphology | PIP5K1B   | 0.000006 | 2.603886 |  |
| 20334 | Normal tissue morphology | C4orf19   | 0.000122 | 2.613077 |  |
| 20335 | Normal tissue morphology | PXMP2     | 0        | 2.613262 |  |
| 20336 | Normal tissue morphology | SMOX      | 0        | 2.620293 |  |
| 20337 | Normal tissue morphology | CPM       | 0.000051 | 2.621781 |  |
| 20338 | Normal tissue morphology | MALL      | 0.00003  | 2.631392 |  |
| 20339 | Normal tissue morphology | USP2      | 0.000085 | 2.636411 |  |
| 20340 | Normal tissue morphology | FMO5      | 0.000299 | 2.660514 |  |
| 20341 | Normal tissue morphology | CGN       | 0.000009 | 2.669418 |  |
| 20342 | Normal tissue morphology | SATB2     | 0.000007 | 2.679973 |  |
| 20343 | Normal tissue morphology | LMBRD1    | 0        | 2.685609 |  |
| 20344 | Normal tissue morphology | RBM47     | 0.00004  | 2.686042 |  |
| 20345 | Normal tissue morphology | GOLPH2    | 0.000005 | 2.702898 |  |
| 20346 | Normal tissue morphology | C4orf34   | 0.000284 | 2.70772  |  |
| 20347 | Normal tissue morphology | MGC4171   | 0.00001  | 2.724735 |  |
| 20348 | Normal tissue morphology | CCL15     | 0.000004 | 2.725844 |  |

|       |                          |           |          |          |  |
|-------|--------------------------|-----------|----------|----------|--|
| 20349 | Normal tissue morphology | TMEM56    | 0.000041 | 2.746816 |  |
| 20350 | Normal tissue morphology | TUB       | 0.000002 | 2.748186 |  |
| 20351 | Normal tissue morphology | STX8      | 0        | 2.749908 |  |
| 20352 | Normal tissue morphology | LRRC1     | 0.000013 | 2.764394 |  |
| 20353 | Normal tissue morphology | PPP2R3A   | 0.000074 | 2.772831 |  |
| 20354 | Normal tissue morphology | PPID      | 0.000083 | 2.778977 |  |
| 20355 | Normal tissue morphology | FLJ11017  | 0.000002 | 2.782371 |  |
| 20356 | Normal tissue morphology | RGS19IP1  | 0.00001  | 2.784519 |  |
| 20357 | Normal tissue morphology | SGK1      | 0.000007 | 2.786882 |  |
| 20358 | Normal tissue morphology | PPARGC1A  | 0.000012 | 2.794212 |  |
| 20359 | Normal tissue morphology | MMP28     | 0.000034 | 2.79525  |  |
| 20360 | Normal tissue morphology | CHST5     | 0.000004 | 2.795886 |  |
| 20361 | Normal tissue morphology | SEMA4G    | 0.000002 | 2.809155 |  |
| 20362 | Normal tissue morphology | C10ORF32  | 0        | 2.820709 |  |
| 20363 | Normal tissue morphology | TMEM45B   | 0.000002 | 2.820958 |  |
| 20364 | Normal tissue morphology | CLDN7     | 0.000004 | 2.827828 |  |
| 20365 | Normal tissue morphology | LOC400573 | 0.000123 | 2.834344 |  |
| 20366 | Normal tissue morphology | CYP4F12   | 0.000003 | 2.837124 |  |
| 20367 | Normal tissue morphology | PRKAR2B   | 0.000238 | 2.861024 |  |
| 20368 | Normal tissue morphology | TMEM171   | 0.000043 | 2.885524 |  |
| 20369 | Normal tissue morphology | KRT14     | 0.000004 | 2.898214 |  |
| 20370 | Normal tissue morphology | LRP8      | 0        | 2.905623 |  |
| 20371 | Normal tissue morphology | SULT1A1   | 0.000206 | 2.925544 |  |
| 20372 | Normal tissue morphology | SMPD3     | 0.000001 | 2.930047 |  |
| 20373 | Normal tissue morphology | TM4SF2    | 0.000002 | 2.95869  |  |
| 20374 | Normal tissue morphology | FAM3D     | 0.000002 | 2.95883  |  |
| 20375 | Normal tissue morphology | DENND2A   | 0.000061 | 2.97707  |  |
| 20376 | Normal tissue morphology | FAM46C    | 0.000015 | 2.977186 |  |
| 20377 | Normal tissue morphology | TTC23     | 0.000018 | 2.979335 |  |
| 20378 | Normal tissue morphology | ATP5F1    | 0        | 2.984265 |  |
| 20379 | Normal tissue morphology | SULT1A2   | 0.000079 | 2.995262 |  |
| 20380 | Normal tissue morphology | BCLP      | 0.000001 | 3.020425 |  |
| 20381 | Normal tissue morphology | PDCD4     | 0        | 3.025533 |  |
| 20382 | Normal tissue morphology | HIG1      | 0.000002 | 3.027138 |  |
| 20383 | Normal tissue morphology | CCDC68    | 0.000028 | 3.028445 |  |
| 20384 | Normal tissue morphology | KIF16B    | 0.000012 | 3.030102 |  |
| 20385 | Normal tissue morphology | GPR177    | 0        | 3.038642 |  |
| 20386 | Normal tissue morphology | METTL7A   | 0.000069 | 3.051391 |  |
| 20387 | Normal tissue morphology | C6orf29   | 0.000003 | 3.059207 |  |
| 20388 | Normal tissue morphology | CDC25B    | 0        | 3.070827 |  |
| 20389 | Normal tissue morphology | PTTG1IP   | 0        | 3.078129 |  |
| 20390 | Normal tissue morphology | CEACAM1   | 0.000043 | 3.080438 |  |
| 20391 | Normal tissue morphology | FLJ20152  | 0.000005 | 3.093667 |  |
| 20392 | Normal tissue morphology | TP53I5    | 0.000002 | 3.120461 |  |
| 20393 | Normal tissue morphology | SCNN1A    | 0.000005 | 3.135971 |  |
| 20394 | Normal tissue morphology | SIDT1     | 0        | 3.139651 |  |
| 20395 | Normal tissue morphology | LYRM2     | 0        | 3.163281 |  |
| 20396 | Normal tissue morphology | CA12      | 0.00004  | 3.220574 |  |
| 20397 | Normal tissue morphology | ZBTB7C    | 0.000141 | 3.266716 |  |
| 20398 | Normal tissue morphology | PDPN      | 0        | 3.271364 |  |

|       |                          |             |          |          |  |
|-------|--------------------------|-------------|----------|----------|--|
| 20399 | Normal tissue morphology | DKFZP564O08 | 0.000001 | 3.288601 |  |
| 20400 | Normal tissue morphology | C2orf88     | 0.000052 | 3.296037 |  |
| 20401 | Normal tissue morphology | GCNT3       | 0.000089 | 3.318624 |  |
| 20402 | Normal tissue morphology | AHCYL2      | 0.000007 | 3.330288 |  |
| 20403 | Normal tissue morphology | CKMT1A      | 0.000012 | 3.35529  |  |
| 20404 | Normal tissue morphology | EYA2        | 0.000292 | 3.360873 |  |
| 20405 | Normal tissue morphology | STYK1       | 0        | 3.378539 |  |
| 20406 | Normal tissue morphology | ZNF575      | 0.000035 | 3.378636 |  |
| 20407 | Normal tissue morphology | SALL4       | 0        | 3.38018  |  |
| 20408 | Normal tissue morphology | KIAA1737    | 0        | 3.412045 |  |
| 20409 | Normal tissue morphology | KRT19       | 0.000002 | 3.421713 |  |
| 20410 | Normal tissue morphology | ATP5J       | 0        | 3.430434 |  |
| 20411 | Normal tissue morphology | EPHA10      | 0.000008 | 3.435053 |  |
| 20412 | Normal tissue morphology | ITM2C       | 0.000001 | 3.435864 |  |
| 20413 | Normal tissue morphology | SLC9A2      | 0.000098 | 3.438543 |  |
| 20414 | Normal tissue morphology | BSG         | 0        | 3.443386 |  |
| 20415 | Normal tissue morphology | ALDH1A1     | 0        | 3.48098  |  |
| 20416 | Normal tissue morphology | SMPDL3A     | 0.000003 | 3.486516 |  |
| 20417 | Normal tissue morphology | RHBDL2      | 0        | 3.502465 |  |
| 20418 | Normal tissue morphology | TIMP1       | 0        | 3.518513 |  |
| 20419 | Normal tissue morphology | SULT1B1     | 0.000027 | 3.521881 |  |
| 20420 | Normal tissue morphology | FEV         | 0.000012 | 3.526807 |  |
| 20421 | Normal tissue morphology | CES3        | 0.000071 | 3.541904 |  |
| 20422 | Normal tissue morphology | EIF5        | 0        | 3.542339 |  |
| 20423 | Normal tissue morphology | MAOA        | 0.00002  | 3.573062 |  |
| 20424 | Normal tissue morphology | SOSTDC1     | 0.000002 | 3.574382 |  |
| 20425 | Normal tissue morphology | UGT1A8      | 0.000013 | 3.581855 |  |
| 20426 | Normal tissue morphology | FLJ13391    | 0        | 3.591249 |  |
| 20427 | Normal tissue morphology | ID2         | 0        | 3.593484 |  |
| 20428 | Normal tissue morphology | C10orf99    | 0.000028 | 3.620081 |  |
| 20429 | Normal tissue morphology | PCK1        | 0.000292 | 3.635801 |  |
| 20430 | Normal tissue morphology | TUBAL3      | 0.00023  | 3.650291 |  |
| 20431 | Normal tissue morphology | ARL14       | 0.000007 | 3.700351 |  |
| 20432 | Normal tissue morphology | ABCA8       | 0.000244 | 3.701992 |  |
| 20433 | Normal tissue morphology | NMES1       | 0        | 3.734037 |  |
| 20434 | Normal tissue morphology | TGFBI       | 0        | 3.780405 |  |
| 20435 | Normal tissue morphology | PADI2       | 0.00016  | 3.803735 |  |
| 20436 | Normal tissue morphology | FAM55D      | 0.000219 | 3.823774 |  |
| 20437 | Normal tissue morphology | KLF6        | 0        | 3.841979 |  |
| 20438 | Normal tissue morphology | PTPRH       | 0.000006 | 3.847104 |  |
| 20439 | Normal tissue morphology | SELENBP1    | 0.000008 | 3.851216 |  |
| 20440 | Normal tissue morphology | PLA2G10     | 0.000013 | 3.896015 |  |
| 20441 | Normal tissue morphology | NEU4        | 0.000001 | 3.914172 |  |
| 20442 | Normal tissue morphology | UGT2B17     | 0.000072 | 3.933187 |  |
| 20443 | Normal tissue morphology | MOGAT2      | 0.000064 | 3.948991 |  |
| 20444 | Normal tissue morphology | SNRPN       | 0        | 4.007894 |  |
| 20445 | Normal tissue morphology | ARHGAP44    | 0.000252 | 4.0241   |  |
| 20446 | Normal tissue morphology | AGPAT9      | 0.000063 | 4.032915 |  |
| 20447 | Normal tissue morphology | CKB         | 0.000008 | 4.034661 |  |
| 20448 | Normal tissue morphology | ESM1        | 0        | 4.042148 |  |

|       |                          |           |          |           |  |
|-------|--------------------------|-----------|----------|-----------|--|
| 20449 | Normal tissue morphology | NFE2L3    | 0        | 4.056847  |  |
| 20450 | Normal tissue morphology | C11orf33  | 0.000012 | 4.060275  |  |
| 20451 | Normal tissue morphology | TRIB3     | 0        | 4.096233  |  |
| 20452 | Normal tissue morphology | UGT2B15   | 0.000038 | 4.136587  |  |
| 20453 | Normal tissue morphology | SLC7A5    | 0        | 4.182042  |  |
| 20454 | Normal tissue morphology | SPINK5    | 0.000007 | 4.320209  |  |
| 20455 | Normal tissue morphology | LGALS2    | 0.000009 | 4.324702  |  |
| 20456 | Normal tissue morphology | GSN       | 0        | 4.329842  |  |
| 20457 | Normal tissue morphology | CWH43     | 0.000237 | 4.42692   |  |
| 20458 | Normal tissue morphology | LGALS4    | 0.000001 | 4.552136  |  |
| 20459 | Normal tissue morphology | DHRS11    | 0.000021 | 4.552529  |  |
| 20460 | Normal tissue morphology | ABCC13    | 0.00001  | 4.56359   |  |
| 20461 | Normal tissue morphology | BGN       | 0        | 4.605698  |  |
| 20462 | Normal tissue morphology | COL1A2    | 0        | 4.622895  |  |
| 20463 | Normal tissue morphology | MAPK10    | 0.010117 | 4.758095  |  |
| 20464 | Normal tissue morphology | LOC144501 | 0        | 4.899047  |  |
| 20465 | Normal tissue morphology | VSIG2     | 0        | 4.980351  |  |
| 20466 | Normal tissue morphology | PYY2      | 0.000003 | 5.050842  |  |
| 20467 | Normal tissue morphology | MUCDHL    | 0.000006 | 5.11399   |  |
| 20468 | Normal tissue morphology | PHLDA1    | 0        | 5.471027  |  |
| 20469 | Normal tissue morphology | CHP2      | 0.000168 | 5.791364  |  |
| 20470 | Normal tissue morphology | ABCG2     | 0.000246 | 6.568358  |  |
| 20471 | Normal tissue morphology | CEACAM7   | 0.000003 | 6.587967  |  |
| 20472 | Normal tissue morphology | MT1X      | 0        | 6.852298  |  |
| 20473 | Normal tissue morphology | COL11A1   | 0        | 7.083734  |  |
| 20474 | Normal tissue morphology | ACTB      | 0        | 7.182208  |  |
| 20475 | Normal tissue morphology | INSL5     | 0.000002 | 7.817222  |  |
| 20476 | Normal tissue morphology | SLC26A3   | 0.000007 | 10.831482 |  |
| 20477 | Normal tissue morphology | IL8       | 0        | 12.714234 |  |
| 20478 | Normal tissue morphology | KIAA1199  | 0        | 13.538706 |  |
| 20479 | Normal tissue morphology | FOXQ1     | 0        | 15.928664 |  |
| 20480 | Normal tissue morphology | MMP7      | 0        | 18.824692 |  |
| 20481 | Osteoporosis             | IRX5      | 0.015188 | -1.707782 |  |
| 20482 | Osteoporosis             | CD86      | 0.023613 | -1.650987 |  |
| 20483 | Osteoporosis             | CGB1      | 0.031122 | -1.650652 |  |
| 20484 | Osteoporosis             | CCDC66    | 0.010377 | -1.631498 |  |
| 20485 | Osteoporosis             | BCR       | 0.001675 | -1.628805 |  |
| 20486 | Osteoporosis             | LRRC2     | 0.022407 | -1.617841 |  |
| 20487 | Osteoporosis             | VPS18     | 0.022524 | -1.617524 |  |
| 20488 | Osteoporosis             | SAPS1     | 0.017665 | -1.612422 |  |
| 20489 | Osteoporosis             | EFTUD1    | 0.031923 | -1.608905 |  |
| 20490 | Osteoporosis             | RBM22     | 0.030823 | -1.602585 |  |
| 20491 | Osteoporosis             | CABP7     | 0.022796 | -1.596781 |  |
| 20492 | Osteoporosis             | RAP1GAP   | 0.005335 | -1.590147 |  |
| 20493 | Osteoporosis             | CRISPLD2  | 0.013591 | -1.583184 |  |
| 20494 | Osteoporosis             | WDR33     | 0.017679 | -1.575636 |  |
| 20495 | Osteoporosis             | C1orf173  | 0.000307 | -1.545916 |  |
| 20496 | Osteoporosis             | SLC45A4   | 0.009605 | -1.536165 |  |
| 20497 | Osteoporosis             | TEF       | 0.004786 | -1.525566 |  |
| 20498 | Osteoporosis             | LOC286272 | 0.023598 | -1.52479  |  |

|       |                             |           |          |             |  |
|-------|-----------------------------|-----------|----------|-------------|--|
| 20499 | Osteoporosis                | RPA4      | 0.017736 | -1.524142   |  |
| 20500 | Osteoporosis                | PIK3R5    | 0.028155 | -1.510486   |  |
| 20501 | Osteoporosis                | TTC23     | 0.000405 | -1.510329   |  |
| 20502 | Osteoporosis                | FLJ10404  | 0.026901 | -1.504107   |  |
| 20503 | Osteoporosis family history | IRX5      | 0.015188 | -1.707782   |  |
| 20504 | Osteoporosis family history | CD86      | 0.023613 | -1.650987   |  |
| 20505 | Osteoporosis family history | CGB1      | 0.031122 | -1.650652   |  |
| 20506 | Osteoporosis family history | CCDC66    | 0.010377 | -1.631498   |  |
| 20507 | Osteoporosis family history | BCR       | 0.001675 | -1.628805   |  |
| 20508 | Osteoporosis family history | LRRC2     | 0.022407 | -1.617841   |  |
| 20509 | Osteoporosis family history | VPS18     | 0.022524 | -1.617524   |  |
| 20510 | Osteoporosis family history | SAPS1     | 0.017665 | -1.612422   |  |
| 20511 | Osteoporosis family history | EFTUD1    | 0.031923 | -1.608905   |  |
| 20512 | Osteoporosis family history | RBM22     | 0.030823 | -1.602585   |  |
| 20513 | Osteoporosis family history | CABP7     | 0.022796 | -1.596781   |  |
| 20514 | Osteoporosis family history | RAP1GAP   | 0.005335 | -1.590147   |  |
| 20515 | Osteoporosis family history | CRISPLD2  | 0.013591 | -1.583184   |  |
| 20516 | Osteoporosis family history | WDR33     | 0.017679 | -1.575636   |  |
| 20517 | Osteoporosis family history | C1orf173  | 0.000307 | -1.545916   |  |
| 20518 | Osteoporosis family history | SLC45A4   | 0.009605 | -1.536165   |  |
| 20519 | Osteoporosis family history | TEF       | 0.004786 | -1.525566   |  |
| 20520 | Osteoporosis family history | LOC286272 | 0.023598 | -1.52479    |  |
| 20521 | Osteoporosis family history | RPA4      | 0.017736 | -1.524142   |  |
| 20522 | Osteoporosis family history | PIK3R5    | 0.028155 | -1.510486   |  |
| 20523 | Osteoporosis family history | TTC23     | 0.000405 | -1.510329   |  |
| 20524 | Osteoporosis family history | FLJ10404  | 0.026901 | -1.504107   |  |
| 20525 | Ovarian Carcinoma           | CGI-38    | 0.003991 | -2.78059    |  |
| 20526 | Ovarian Carcinoma           | SETBP1    | 0.006355 | -2.081398   |  |
| 20527 | Ovarian Carcinoma           | SDK1      | 0.003991 | 2.026087    |  |
| 20528 | Ovarian Carcinoma           | MS4A4A    | 0.010815 | 2.180689    |  |
| 20529 | Ovarian Carcinoma           | ARL4A     | 0.027133 | 2.30044     |  |
| 20530 | Ovarian Carcinoma           | ST3GAL2   | 0.000845 | 2.361099    |  |
| 20531 | Ovarian Carcinoma           | TAP2      | 0.020351 | 2.516374    |  |
| 20532 | Ovarian Carcinoma           | LOC440607 | 0.044929 | 2.670231    |  |
| 20533 | Ovarian Carcinoma           | SAMD9     | 0.035369 | 2.792032    |  |
| 20534 | Ovarian Carcinoma           | IFI44     | 0.020351 | 3.348431    |  |
| 20535 | Ovarian Carcinoma           | CLEC4D    | 0.027133 | 3.620512    |  |
| 20536 | Ovarian Carcinoma           | MGC10233  | 0.031326 | 3.995307    |  |
| 20537 | P1                          | SAA1      | 0.049023 | -3.73593    |  |
| 20538 | P1                          | C5orf4    | 0.008187 | 2.134085    |  |
| 20539 | PAIN                        | XIST      | 0        | 2.098876    |  |
| 20540 | Papillary adenocarcinoma    | FABP1     | 0        | -1783.98152 |  |
| 20541 | Papillary adenocarcinoma    | TSPAN8    | 0        | -734.676541 |  |
| 20542 | Papillary adenocarcinoma    | SLC26A3   | 0        | -395.203791 |  |
| 20543 | Papillary adenocarcinoma    | LGALS4    | 0        | -224.746236 |  |
| 20544 | Papillary adenocarcinoma    | CEACAM5   | 0        | -219.84559  |  |
| 20545 | Papillary adenocarcinoma    | C10orf99  | 0        | -178.128302 |  |
| 20546 | Papillary adenocarcinoma    | MUC12     | 0        | -167.119962 |  |
| 20547 | Papillary adenocarcinoma    | CEACAM7   | 0        | -154.915537 |  |
| 20548 | Papillary adenocarcinoma    | GPX2      | 0        | -154.567716 |  |

|       |                          |             |   |             |  |
|-------|--------------------------|-------------|---|-------------|--|
| 20549 | Papillary adenocarcinoma | KRT20       | 0 | -153.448325 |  |
| 20550 | Papillary adenocarcinoma | CDH17       | 0 | -149.50701  |  |
| 20551 | Papillary adenocarcinoma | TFF3        | 0 | -149.453515 |  |
| 20552 | Papillary adenocarcinoma | OLFM4       | 0 | -140.332281 |  |
| 20553 | Papillary adenocarcinoma | S100P       | 0 | -136.299851 |  |
| 20554 | Papillary adenocarcinoma | IGL@        | 0 | -133.595203 |  |
| 20555 | Papillary adenocarcinoma | KIAA1324    | 0 | -123.761955 |  |
| 20556 | Papillary adenocarcinoma | RPS4Y1      | 0 | -123.588928 |  |
| 20557 | Papillary adenocarcinoma | CLCA1       | 0 | -123.190859 |  |
| 20558 | Papillary adenocarcinoma | CLRN3       | 0 | -117.289944 |  |
| 20559 | Papillary adenocarcinoma | REG4        | 0 | -96.670892  |  |
| 20560 | Papillary adenocarcinoma | REG1A       | 0 | -92.52442   |  |
| 20561 | Papillary adenocarcinoma | SPINK4      | 0 | -90.100776  |  |
| 20562 | Papillary adenocarcinoma | DDC         | 0 | -89.997549  |  |
| 20563 | Papillary adenocarcinoma | MUC2        | 0 | -84.600435  |  |
| 20564 | Papillary adenocarcinoma | REG3A       | 0 | -78.863999  |  |
| 20565 | Papillary adenocarcinoma | IGLV2-23    | 0 | -77.613524  |  |
| 20566 | Papillary adenocarcinoma | IGHM        | 0 | -77.183227  |  |
| 20567 | Papillary adenocarcinoma | IGK@        | 0 | -76.269111  |  |
| 20568 | Papillary adenocarcinoma | MEP1A       | 0 | -72.369017  |  |
| 20569 | Papillary adenocarcinoma | TFF1        | 0 | -72.136157  |  |
| 20570 | Papillary adenocarcinoma | NOX1        | 0 | -69.990168  |  |
| 20571 | Papillary adenocarcinoma | CLCA4       | 0 | -69.233961  |  |
| 20572 | Papillary adenocarcinoma | CEACAM6     | 0 | -68.670651  |  |
| 20573 | Papillary adenocarcinoma | ZG16        | 0 | -68.377934  |  |
| 20574 | Papillary adenocarcinoma | DEFA5       | 0 | -66.01064   |  |
| 20575 | Papillary adenocarcinoma | MUC13       | 0 | -62.426339  |  |
| 20576 | Papillary adenocarcinoma | HMGCS2      | 0 | -61.065686  |  |
| 20577 | Papillary adenocarcinoma | GPA33       | 0 | -59.972802  |  |
| 20578 | Papillary adenocarcinoma | IGJ         | 0 | -56.228497  |  |
| 20579 | Papillary adenocarcinoma | ASCL2       | 0 | -55.773054  |  |
| 20580 | Papillary adenocarcinoma | SPINK1      | 0 | -53.698726  |  |
| 20581 | Papillary adenocarcinoma | CYP2B6      | 0 | -52.886559  |  |
| 20582 | Papillary adenocarcinoma | IGHA1       | 0 | -52.816301  |  |
| 20583 | Papillary adenocarcinoma | UGT2B17     | 0 | -51.817487  |  |
| 20584 | Papillary adenocarcinoma | ARL14       | 0 | -50.58906   |  |
| 20585 | Papillary adenocarcinoma | NR1I2       | 0 | -50.560411  |  |
| 20586 | Papillary adenocarcinoma | CCL14-CCL15 | 0 | -50.166247  |  |
| 20587 | Papillary adenocarcinoma | TMPRSS2     | 0 | -49.054104  |  |
| 20588 | Papillary adenocarcinoma | ITLN1       | 0 | -48.78804   |  |
| 20589 | Papillary adenocarcinoma | RNF128      | 0 | -48.37345   |  |
| 20590 | Papillary adenocarcinoma | NCRNA00261  | 0 | -46.045832  |  |
| 20591 | Papillary adenocarcinoma | GUCY2C      | 0 | -44.202045  |  |
| 20592 | Papillary adenocarcinoma | MMP3        | 0 | -43.589004  |  |
| 20593 | Papillary adenocarcinoma | EPS8L3      | 0 | -41.826155  |  |
| 20594 | Papillary adenocarcinoma | PLA2G2A     | 0 | -41.478404  |  |
| 20595 | Papillary adenocarcinoma | FAM55D      | 0 | -40.190006  |  |
| 20596 | Papillary adenocarcinoma | DDX3Y       | 0 | -37.739695  |  |
| 20597 | Papillary adenocarcinoma | PIGR        | 0 | -36.448948  |  |
| 20598 | Papillary adenocarcinoma | MS4A12      | 0 | -35.634078  |  |

|       |                          |          |   |            |  |
|-------|--------------------------|----------|---|------------|--|
| 20599 | Papillary adenocarcinoma | IGKV4-1  | 0 | -35.548321 |  |
| 20600 | Papillary adenocarcinoma | AGR2     | 0 | -34.859634 |  |
| 20601 | Papillary adenocarcinoma | PRAC     | 0 | -34.632391 |  |
| 20602 | Papillary adenocarcinoma | ZG16B    | 0 | -32.921317 |  |
| 20603 | Papillary adenocarcinoma | TDGF1    | 0 | -31.737572 |  |
| 20604 | Papillary adenocarcinoma | TNFRSF17 | 0 | -31.444954 |  |
| 20605 | Papillary adenocarcinoma | VIL1     | 0 | -29.601064 |  |
| 20606 | Papillary adenocarcinoma | CYorf15B | 0 | -29.362298 |  |
| 20607 | Papillary adenocarcinoma | USH1C    | 0 | -29.230689 |  |
| 20608 | Papillary adenocarcinoma | CDX1     | 0 | -29.218085 |  |
| 20609 | Papillary adenocarcinoma | CDX2     | 0 | -29.1671   |  |
| 20610 | Papillary adenocarcinoma | HSD17B2  | 0 | -29.102854 |  |
| 20611 | Papillary adenocarcinoma | CDHR5    | 0 | -27.950353 |  |
| 20612 | Papillary adenocarcinoma | IGLC7    | 0 | -27.852389 |  |
| 20613 | Papillary adenocarcinoma | TRIM15   | 0 | -27.716643 |  |
| 20614 | Papillary adenocarcinoma | ADH1C    | 0 | -27.259597 |  |
| 20615 | Papillary adenocarcinoma | TMEM45B  | 0 | -26.912887 |  |
| 20616 | Papillary adenocarcinoma | PRSS3    | 0 | -26.772156 |  |
| 20617 | Papillary adenocarcinoma | AZGP1    | 0 | -26.027685 |  |
| 20618 | Papillary adenocarcinoma | DUOX2    | 0 | -25.195539 |  |
| 20619 | Papillary adenocarcinoma | EIF1AY   | 0 | -24.807507 |  |
| 20620 | Papillary adenocarcinoma | CCL20    | 0 | -24.178354 |  |
| 20621 | Papillary adenocarcinoma | HEPACAM2 | 0 | -24.016373 |  |
| 20622 | Papillary adenocarcinoma | COL17A1  | 0 | -23.746549 |  |
| 20623 | Papillary adenocarcinoma | C17orf73 | 0 | -23.489011 |  |
| 20624 | Papillary adenocarcinoma | PLAC8    | 0 | -23.193952 |  |
| 20625 | Papillary adenocarcinoma | CEACAM1  | 0 | -23.100644 |  |
| 20626 | Papillary adenocarcinoma | HOXB13   | 0 | -22.00054  |  |
| 20627 | Papillary adenocarcinoma | POF1B    | 0 | -21.924313 |  |
| 20628 | Papillary adenocarcinoma | RETNLB   | 0 | -21.523907 |  |
| 20629 | Papillary adenocarcinoma | ATP10B   | 0 | -21.440224 |  |
| 20630 | Papillary adenocarcinoma | HOXA10   | 0 | -20.502457 |  |
| 20631 | Papillary adenocarcinoma | IGLV1-36 | 0 | -20.41857  |  |
| 20632 | Papillary adenocarcinoma | ATP2A3   | 0 | -20.352857 |  |
| 20633 | Papillary adenocarcinoma | IGKC     | 0 | -20.220252 |  |
| 20634 | Papillary adenocarcinoma | DPEP1    | 0 | -20.1644   |  |
| 20635 | Papillary adenocarcinoma | CELP     | 0 | -19.979544 |  |
| 20636 | Papillary adenocarcinoma | CDA      | 0 | -19.848012 |  |
| 20637 | Papillary adenocarcinoma | PARM1    | 0 | -19.524159 |  |
| 20638 | Papillary adenocarcinoma | TRIM31   | 0 | -19.427096 |  |
| 20639 | Papillary adenocarcinoma | C4BPB    | 0 | -18.999893 |  |
| 20640 | Papillary adenocarcinoma | ISX      | 0 | -18.740554 |  |
| 20641 | Papillary adenocarcinoma | IGKV3-20 | 0 | -18.577828 |  |
| 20642 | Papillary adenocarcinoma | UGT1A1   | 0 | -18.403763 |  |
| 20643 | Papillary adenocarcinoma | AREG     | 0 | -18.233147 |  |
| 20644 | Papillary adenocarcinoma | CENPV    | 0 | -17.999801 |  |
| 20645 | Papillary adenocarcinoma | LEFTY1   | 0 | -17.105627 |  |
| 20646 | Papillary adenocarcinoma | HOXA13   | 0 | -16.89773  |  |
| 20647 | Papillary adenocarcinoma | LGR5     | 0 | -16.892466 |  |
| 20648 | Papillary adenocarcinoma | AKR1B10  | 0 | -16.655681 |  |



|       |                          |              |   |            |  |
|-------|--------------------------|--------------|---|------------|--|
| 20649 | Papillary adenocarcinoma | TOX3         | 0 | -16.403757 |  |
| 20650 | Papillary adenocarcinoma | FUT6         | 0 | -16.370011 |  |
| 20651 | Papillary adenocarcinoma | LRRC19       | 0 | -16.268962 |  |
| 20652 | Papillary adenocarcinoma | SI           | 0 | -16.15328  |  |
| 20653 | Papillary adenocarcinoma | CYorf15A     | 0 | -16.099526 |  |
| 20654 | Papillary adenocarcinoma | AQP8         | 0 | -15.99193  |  |
| 20655 | Papillary adenocarcinoma | TRAC         | 0 | -15.885642 |  |
| 20656 | Papillary adenocarcinoma | DSG3         | 0 | -15.808497 |  |
| 20657 | Papillary adenocarcinoma | RNF186       | 0 | -15.808286 |  |
| 20658 | Papillary adenocarcinoma | LOC646627    | 0 | -15.693473 |  |
| 20659 | Papillary adenocarcinoma | NR1H4        | 0 | -15.617785 |  |
| 20660 | Papillary adenocarcinoma | MAOA         | 0 | -15.543043 |  |
| 20661 | Papillary adenocarcinoma | HNF4A        | 0 | -15.294299 |  |
| 20662 | Papillary adenocarcinoma | LOC100288092 | 0 | -15.21226  |  |
| 20663 | Papillary adenocarcinoma | KDM5D        | 0 | -15.210829 |  |
| 20664 | Papillary adenocarcinoma | IGLL3P       | 0 | -15.202068 |  |
| 20665 | Papillary adenocarcinoma | PCK1         | 0 | -14.874927 |  |
| 20666 | Papillary adenocarcinoma | UGT2A3       | 0 | -14.604468 |  |
| 20667 | Papillary adenocarcinoma | TMC5         | 0 | -14.436054 |  |
| 20668 | Papillary adenocarcinoma | SOX8         | 0 | -14.423931 |  |
| 20669 | Papillary adenocarcinoma | RASSF6       | 0 | -13.855458 |  |
| 20670 | Papillary adenocarcinoma | ACSL5        | 0 | -13.618466 |  |
| 20671 | Papillary adenocarcinoma | DMBT1        | 0 | -13.498516 |  |
| 20672 | Papillary adenocarcinoma | CA4          | 0 | -13.274225 |  |
| 20673 | Papillary adenocarcinoma | VSNL1        | 0 | -13.219894 |  |
| 20674 | Papillary adenocarcinoma | CST1         | 0 | -13.113854 |  |
| 20675 | Papillary adenocarcinoma | SSTR1        | 0 | -13.016504 |  |
| 20676 | Papillary adenocarcinoma | PNLIPRP2     | 0 | -12.906909 |  |
| 20677 | Papillary adenocarcinoma | IGLL5        | 0 | -12.823177 |  |
| 20678 | Papillary adenocarcinoma | TMED6        | 0 | -12.803579 |  |
| 20679 | Papillary adenocarcinoma | SLC39A5      | 0 | -12.669456 |  |
| 20680 | Papillary adenocarcinoma | FAM55A       | 0 | -12.459692 |  |
| 20681 | Papillary adenocarcinoma | IGLV1-40     | 0 | -12.275435 |  |
| 20682 | Papillary adenocarcinoma | PLCB4        | 0 | -12.157713 |  |
| 20683 | Papillary adenocarcinoma | UGT2B15      | 0 | -11.979497 |  |
| 20684 | Papillary adenocarcinoma | WNK4         | 0 | -11.534228 |  |
| 20685 | Papillary adenocarcinoma | LOC100507192 | 0 | -11.479024 |  |
| 20686 | Papillary adenocarcinoma | LOC96610     | 0 | -11.245215 |  |
| 20687 | Papillary adenocarcinoma | SERPINB5     | 0 | -11.212683 |  |
| 20688 | Papillary adenocarcinoma | CYP2C18      | 0 | -11.177066 |  |
| 20689 | Papillary adenocarcinoma | GPR160       | 0 | -11.017795 |  |
| 20690 | Papillary adenocarcinoma | FGFR4        | 0 | -11.010292 |  |
| 20691 | Papillary adenocarcinoma | DGAT2        | 0 | -10.896638 |  |
| 20692 | Papillary adenocarcinoma | AHNAK        | 0 | -10.775066 |  |
| 20693 | Papillary adenocarcinoma | IGLJ3        | 0 | -10.591129 |  |
| 20694 | Papillary adenocarcinoma | FAM40B       | 0 | -10.51281  |  |
| 20695 | Papillary adenocarcinoma | C19orf77     | 0 | -10.374184 |  |
| 20696 | Papillary adenocarcinoma | HLA-DQA1     | 0 | -10.373276 |  |
| 20697 | Papillary adenocarcinoma | MMP1         | 0 | -10.323301 |  |
| 20698 | Papillary adenocarcinoma | LY6G6D       | 0 | -10.286764 |  |

|       |                          |            |   |            |  |
|-------|--------------------------|------------|---|------------|--|
| 20699 | Papillary adenocarcinoma | PIP5K1B    | 0 | -10.25627  |  |
| 20700 | Papillary adenocarcinoma | EREG       | 0 | -10.228443 |  |
| 20701 | Papillary adenocarcinoma | SLCO1B3    | 0 | -10.042318 |  |
| 20702 | Papillary adenocarcinoma | RCBTB1     | 0 | -10.034885 |  |
| 20703 | Papillary adenocarcinoma | C20orf118  | 0 | -10.001177 |  |
| 20704 | Papillary adenocarcinoma | CA1        | 0 | -9.999398  |  |
| 20705 | Papillary adenocarcinoma | SLC27A2    | 0 | -9.856283  |  |
| 20706 | Papillary adenocarcinoma | MUC17      | 0 | -9.634307  |  |
| 20707 | Papillary adenocarcinoma | SCARA5     | 0 | -9.554463  |  |
| 20708 | Papillary adenocarcinoma | SATB2      | 0 | -9.548549  |  |
| 20709 | Papillary adenocarcinoma | AKR1C3     | 0 | -9.427411  |  |
| 20710 | Papillary adenocarcinoma | ETS2       | 0 | -9.415206  |  |
| 20711 | Papillary adenocarcinoma | ADAMDEC1   | 0 | -9.363608  |  |
| 20712 | Papillary adenocarcinoma | P2RX5      | 0 | -9.307098  |  |
| 20713 | Papillary adenocarcinoma | BTNL8      | 0 | -9.241355  |  |
| 20714 | Papillary adenocarcinoma | SLC25A15   | 0 | -9.229452  |  |
| 20715 | Papillary adenocarcinoma | GUCA2A     | 0 | -9.215059  |  |
| 20716 | Papillary adenocarcinoma | SLC4A4     | 0 | -9.20736   |  |
| 20717 | Papillary adenocarcinoma | C1orf125   | 0 | -9.090797  |  |
| 20718 | Papillary adenocarcinoma | C2orf89    | 0 | -9.032453  |  |
| 20719 | Papillary adenocarcinoma | KDM4C      | 0 | -9.018504  |  |
| 20720 | Papillary adenocarcinoma | C2CD4A     | 0 | -9.005936  |  |
| 20721 | Papillary adenocarcinoma | CHP2       | 0 | -8.957452  |  |
| 20722 | Papillary adenocarcinoma | C21orf88   | 0 | -8.922461  |  |
| 20723 | Papillary adenocarcinoma | FOXD1      | 0 | -8.920909  |  |
| 20724 | Papillary adenocarcinoma | MYB        | 0 | -8.801258  |  |
| 20725 | Papillary adenocarcinoma | SLC6A14    | 0 | -8.79646   |  |
| 20726 | Papillary adenocarcinoma | ACE2       | 0 | -8.746041  |  |
| 20727 | Papillary adenocarcinoma | PROX1      | 0 | -8.718629  |  |
| 20728 | Papillary adenocarcinoma | LGALS2     | 0 | -8.707535  |  |
| 20729 | Papillary adenocarcinoma | TPSAB1     | 0 | -8.50733   |  |
| 20730 | Papillary adenocarcinoma | IGHG1      | 0 | -8.424752  |  |
| 20731 | Papillary adenocarcinoma | SLC3A1     | 0 | -8.361984  |  |
| 20732 | Papillary adenocarcinoma | GREM2      | 0 | -8.354549  |  |
| 20733 | Papillary adenocarcinoma | PTPRN2     | 0 | -8.352914  |  |
| 20734 | Papillary adenocarcinoma | GNG4       | 0 | -8.351523  |  |
| 20735 | Papillary adenocarcinoma | WNK2       | 0 | -8.32134   |  |
| 20736 | Papillary adenocarcinoma | NEBL       | 0 | -8.254719  |  |
| 20737 | Papillary adenocarcinoma | FIBCD1     | 0 | -8.249466  |  |
| 20738 | Papillary adenocarcinoma | C6orf105   | 0 | -8.167827  |  |
| 20739 | Papillary adenocarcinoma | CTSE       | 0 | -8.165862  |  |
| 20740 | Papillary adenocarcinoma | NQO1       | 0 | -8.049924  |  |
| 20741 | Papillary adenocarcinoma | SCD        | 0 | -8.03653   |  |
| 20742 | Papillary adenocarcinoma | ARSE       | 0 | -8.021958  |  |
| 20743 | Papillary adenocarcinoma | SLC1A7     | 0 | -7.746176  |  |
| 20744 | Papillary adenocarcinoma | IHH        | 0 | -7.744896  |  |
| 20745 | Papillary adenocarcinoma | FAR2       | 0 | -7.688133  |  |
| 20746 | Papillary adenocarcinoma | TAS2R16    | 0 | -7.370474  |  |
| 20747 | Papillary adenocarcinoma | GABBR1     | 0 | -7.329296  |  |
| 20748 | Papillary adenocarcinoma | NCRNA00238 | 0 | -7.298512  |  |

|       |                          |           |   |           |  |
|-------|--------------------------|-----------|---|-----------|--|
| 20749 | Papillary adenocarcinoma | POU2AF1   | 0 | -7.135486 |  |
| 20750 | Papillary adenocarcinoma | SLC5A9    | 0 | -7.120683 |  |
| 20751 | Papillary adenocarcinoma | P2RY13    | 0 | -7.08136  |  |
| 20752 | Papillary adenocarcinoma | SLA2      | 0 | -7.064962 |  |
| 20753 | Papillary adenocarcinoma | C16orf81  | 0 | -7.049039 |  |
| 20754 | Papillary adenocarcinoma | C13orf18  | 0 | -6.929746 |  |
| 20755 | Papillary adenocarcinoma | ZNF460    | 0 | -6.864245 |  |
| 20756 | Papillary adenocarcinoma | FUT4      | 0 | -6.810964 |  |
| 20757 | Papillary adenocarcinoma | GMDS      | 0 | -6.762556 |  |
| 20758 | Papillary adenocarcinoma | MARVELD3  | 0 | -6.72383  |  |
| 20759 | Papillary adenocarcinoma | LOC285943 | 0 | -6.706774 |  |
| 20760 | Papillary adenocarcinoma | IGHD      | 0 | -6.691216 |  |
| 20761 | Papillary adenocarcinoma | URB1      | 0 | -6.648354 |  |
| 20762 | Papillary adenocarcinoma | AXIN2     | 0 | -6.485979 |  |
| 20763 | Papillary adenocarcinoma | TRPM6     | 0 | -6.44014  |  |
| 20764 | Papillary adenocarcinoma | CAPN9     | 0 | -6.394351 |  |
| 20765 | Papillary adenocarcinoma | SMOX      | 0 | -6.363351 |  |
| 20766 | Papillary adenocarcinoma | CCL14     | 0 | -6.359321 |  |
| 20767 | Papillary adenocarcinoma | ITGA6     | 0 | -6.324961 |  |
| 20768 | Papillary adenocarcinoma | EFCAB4B   | 0 | -6.270735 |  |
| 20769 | Papillary adenocarcinoma | VSIG2     | 0 | -6.270541 |  |
| 20770 | Papillary adenocarcinoma | NPNT      | 0 | -6.183007 |  |
| 20771 | Papillary adenocarcinoma | HOXD13    | 0 | -6.161745 |  |
| 20772 | Papillary adenocarcinoma | RAB3B     | 0 | -6.159617 |  |
| 20773 | Papillary adenocarcinoma | SLC44A3   | 0 | -6.147693 |  |
| 20774 | Papillary adenocarcinoma | ABCB1     | 0 | -6.08622  |  |
| 20775 | Papillary adenocarcinoma | PCCA      | 0 | -5.998867 |  |
| 20776 | Papillary adenocarcinoma | HES6      | 0 | -5.854675 |  |
| 20777 | Papillary adenocarcinoma | PPP1R1B   | 0 | -5.851692 |  |
| 20778 | Papillary adenocarcinoma | SKP2      | 0 | -5.764666 |  |
| 20779 | Papillary adenocarcinoma | SMYD1     | 0 | -5.746991 |  |
| 20780 | Papillary adenocarcinoma | GAD1      | 0 | -5.746076 |  |
| 20781 | Papillary adenocarcinoma | PIWIL1    | 0 | -5.529757 |  |
| 20782 | Papillary adenocarcinoma | IL2RG     | 0 | -5.508244 |  |
| 20783 | Papillary adenocarcinoma | TMEM54    | 0 | -5.487605 |  |
| 20784 | Papillary adenocarcinoma | RNASE4    | 0 | -5.421645 |  |
| 20785 | Papillary adenocarcinoma | ENPP3     | 0 | -5.400357 |  |
| 20786 | Papillary adenocarcinoma | ATP2A1    | 0 | -5.396463 |  |
| 20787 | Papillary adenocarcinoma | SLAMF1    | 0 | -5.291965 |  |
| 20788 | Papillary adenocarcinoma | OFCC1     | 0 | -5.211818 |  |
| 20789 | Papillary adenocarcinoma | TTLL6     | 0 | -5.199469 |  |
| 20790 | Papillary adenocarcinoma | DNAJC12   | 0 | -5.177963 |  |
| 20791 | Papillary adenocarcinoma | ANG       | 0 | -5.147582 |  |
| 20792 | Papillary adenocarcinoma | CTLA4     | 0 | -5.145889 |  |
| 20793 | Papillary adenocarcinoma | COL4A4    | 0 | -5.087308 |  |
| 20794 | Papillary adenocarcinoma | KCNJ13    | 0 | -5.084975 |  |
| 20795 | Papillary adenocarcinoma | SMAGP     | 0 | -5.061199 |  |
| 20796 | Papillary adenocarcinoma | SAMD5     | 0 | -5.017224 |  |
| 20797 | Papillary adenocarcinoma | DMRT2     | 0 | -5.008078 |  |
| 20798 | Papillary adenocarcinoma | AMBRA1    | 0 | -5.001326 |  |

|       |                          |              |   |           |  |
|-------|--------------------------|--------------|---|-----------|--|
| 20799 | Papillary adenocarcinoma | SLC26A2      | 0 | -4.956791 |  |
| 20800 | Papillary adenocarcinoma | MSI2         | 0 | -4.956291 |  |
| 20801 | Papillary adenocarcinoma | FCGBP        | 0 | -4.925889 |  |
| 20802 | Papillary adenocarcinoma | RND1         | 0 | -4.914964 |  |
| 20803 | Papillary adenocarcinoma | TFPI         | 0 | -4.885753 |  |
| 20804 | Papillary adenocarcinoma | HAVCR2       | 0 | -4.873647 |  |
| 20805 | Papillary adenocarcinoma | LOC283516    | 0 | -4.85353  |  |
| 20806 | Papillary adenocarcinoma | CHRD1        | 0 | -4.850918 |  |
| 20807 | Papillary adenocarcinoma | GPSM2        | 0 | -4.791922 |  |
| 20808 | Papillary adenocarcinoma | GAL          | 0 | -4.764126 |  |
| 20809 | Papillary adenocarcinoma | FAM83E       | 0 | -4.704437 |  |
| 20810 | Papillary adenocarcinoma | TTBK2        | 0 | -4.683085 |  |
| 20811 | Papillary adenocarcinoma | ANK2         | 0 | -4.636445 |  |
| 20812 | Papillary adenocarcinoma | PLA1A        | 0 | -4.624572 |  |
| 20813 | Papillary adenocarcinoma | KAZALD1      | 0 | -4.614068 |  |
| 20814 | Papillary adenocarcinoma | HS6ST2       | 0 | -4.579907 |  |
| 20815 | Papillary adenocarcinoma | CDC42EP5     | 0 | -4.511951 |  |
| 20816 | Papillary adenocarcinoma | CKB          | 0 | -4.506526 |  |
| 20817 | Papillary adenocarcinoma | KBTBD11      | 0 | -4.504592 |  |
| 20818 | Papillary adenocarcinoma | PTPRH        | 0 | -4.45561  |  |
| 20819 | Papillary adenocarcinoma | MFSD4        | 0 | -4.441447 |  |
| 20820 | Papillary adenocarcinoma | ME1          | 0 | -4.421035 |  |
| 20821 | Papillary adenocarcinoma | LOC100240728 | 0 | -4.405836 |  |
| 20822 | Papillary adenocarcinoma | DUSP21       | 0 | -4.403635 |  |
| 20823 | Papillary adenocarcinoma | TRBC1        | 0 | -4.392807 |  |
| 20824 | Papillary adenocarcinoma | RARA         | 0 | -4.360997 |  |
| 20825 | Papillary adenocarcinoma | ZAK          | 0 | -4.31007  |  |
| 20826 | Papillary adenocarcinoma | COL15A1      | 0 | -4.247255 |  |
| 20827 | Papillary adenocarcinoma | UPB1         | 0 | -4.197305 |  |
| 20828 | Papillary adenocarcinoma | CCND2        | 0 | -4.160703 |  |
| 20829 | Papillary adenocarcinoma | MYOCD        | 0 | -4.145254 |  |
| 20830 | Papillary adenocarcinoma | CD1B         | 0 | -3.980773 |  |
| 20831 | Papillary adenocarcinoma | AGPAT3       | 0 | -3.783545 |  |
| 20832 | Papillary adenocarcinoma | PDE5A        | 0 | -3.764329 |  |
| 20833 | Papillary adenocarcinoma | PBLD         | 0 | -3.754507 |  |
| 20834 | Papillary adenocarcinoma | CLDN15       | 0 | -3.666112 |  |
| 20835 | Papillary adenocarcinoma | PIGZ         | 0 | -3.657187 |  |
| 20836 | Papillary adenocarcinoma | RBM1A        | 0 | -3.621811 |  |
| 20837 | Papillary adenocarcinoma | P2RY14       | 0 | -3.609094 |  |
| 20838 | Papillary adenocarcinoma | TTC6         | 0 | -3.584985 |  |
| 20839 | Papillary adenocarcinoma | NRN1         | 0 | -3.52086  |  |
| 20840 | Papillary adenocarcinoma | PKDCC        | 0 | -3.503283 |  |
| 20841 | Papillary adenocarcinoma | GRIN1        | 0 | -3.471223 |  |
| 20842 | Papillary adenocarcinoma | ELMOD2       | 0 | -3.435836 |  |
| 20843 | Papillary adenocarcinoma | PIWIL4       | 0 | -3.434728 |  |
| 20844 | Papillary adenocarcinoma | CHPT1        | 0 | -3.408503 |  |
| 20845 | Papillary adenocarcinoma | GRK5         | 0 | -3.387093 |  |
| 20846 | Papillary adenocarcinoma | SCLY         | 0 | -3.374821 |  |
| 20847 | Papillary adenocarcinoma | LOC644090    | 0 | -3.26994  |  |
| 20848 | Papillary adenocarcinoma | ABAT         | 0 | -3.089712 |  |

|       |                                     |           |   |             |  |
|-------|-------------------------------------|-----------|---|-------------|--|
| 20849 | Papillary adenocarcinoma            | EGFR      | 0 | -2.981094   |  |
| 20850 | Papillary adenocarcinoma            | C19orf45  | 0 | -2.974887   |  |
| 20851 | Papillary adenocarcinoma            | RNF6      | 0 | -2.929863   |  |
| 20852 | Papillary adenocarcinoma            | PADI2     | 0 | -2.927352   |  |
| 20853 | Papillary adenocarcinoma            | REEP1     | 0 | -2.916067   |  |
| 20854 | Papillary adenocarcinoma            | RBM33     | 0 | -2.901821   |  |
| 20855 | Papillary adenocarcinoma            | LOC25845  | 0 | -2.887602   |  |
| 20856 | Papillary adenocarcinoma            | PXMP4     | 0 | -2.848437   |  |
| 20857 | Papillary adenocarcinoma            | LNK2      | 0 | -2.820126   |  |
| 20858 | Papillary adenocarcinoma            | LOC283508 | 0 | -2.792945   |  |
| 20859 | Papillary adenocarcinoma            | LONRF3    | 0 | -2.784971   |  |
| 20860 | Papillary adenocarcinoma            | C19orf6   | 0 | -2.736061   |  |
| 20861 | Papillary adenocarcinoma            | STEAP1    | 0 | -2.644491   |  |
| 20862 | Papillary adenocarcinoma            | STMN2     | 0 | -2.588828   |  |
| 20863 | Papillary adenocarcinoma            | ITGA1     | 0 | -2.583244   |  |
| 20864 | Papillary adenocarcinoma            | CIT       | 0 | -2.561015   |  |
| 20865 | Papillary adenocarcinoma            | SYTL2     | 0 | -2.554634   |  |
| 20866 | Papillary adenocarcinoma            | ZMYM5     | 0 | -2.500843   |  |
| 20867 | Papillary adenocarcinoma            | SPTBN1    | 0 | -2.472947   |  |
| 20868 | Papillary adenocarcinoma            | PSD3      | 0 | -2.370799   |  |
| 20869 | Papillary adenocarcinoma            | CD300A    | 0 | -2.357685   |  |
| 20870 | Papillary adenocarcinoma            | NOXO1     | 0 | -2.356434   |  |
| 20871 | Papillary adenocarcinoma            | WSCD1     | 0 | -2.333715   |  |
| 20872 | Papillary adenocarcinoma            | FGL2      | 0 | -2.255058   |  |
| 20873 | Papillary adenocarcinoma            | HLA-G     | 0 | -2.248603   |  |
| 20874 | Papillary adenocarcinoma            | KBTBD2    | 0 | -2.136272   |  |
| 20875 | Papillary adenocarcinoma            | LCP2      | 0 | -2.102294   |  |
| 20876 | Papillary adenocarcinoma            | PTPRC     | 0 | -2.080858   |  |
| 20877 | Papillary adenocarcinoma            | MGC45800  | 0 | -2.075695   |  |
| 20878 | Papillary adenocarcinoma            | PIGG      | 0 | -2.064807   |  |
| 20879 | Papillary adenocarcinoma            | SCIN      | 0 | -2.052243   |  |
| 20880 | Papillary adenocarcinoma            | CTTNBP2NL | 0 | -2.046079   |  |
| 20881 | Papillary adenocarcinoma            | BZW1      | 0 | -2.03949    |  |
| 20882 | Papillary adenocarcinoma            | ENPP2     | 0 | -2.004327   |  |
| 20883 | Papillary serous cystadenocarcinoma | FABP1     | 0 | -1813.6329  |  |
| 20884 | Papillary serous cystadenocarcinoma | SLC26A3   | 0 | -218.117964 |  |
| 20885 | Papillary serous cystadenocarcinoma | CEACAM5   | 0 | -217.642189 |  |
| 20886 | Papillary serous cystadenocarcinoma | LGALS4    | 0 | -190.908413 |  |
| 20887 | Papillary serous cystadenocarcinoma | MUC12     | 0 | -156.084886 |  |
| 20888 | Papillary serous cystadenocarcinoma | OLFM4     | 0 | -142.770959 |  |
| 20889 | Papillary serous cystadenocarcinoma | GPX2      | 0 | -141.384873 |  |
| 20890 | Papillary serous cystadenocarcinoma | CDH17     | 0 | -131.255404 |  |
| 20891 | Papillary serous cystadenocarcinoma | CLCA1     | 0 | -119.870007 |  |
| 20892 | Papillary serous cystadenocarcinoma | CEACAM7   | 0 | -111.453658 |  |
| 20893 | Papillary serous cystadenocarcinoma | S100P     | 0 | -104.454295 |  |
| 20894 | Papillary serous cystadenocarcinoma | CEACAM6   | 0 | -97.93911   |  |
| 20895 | Papillary serous cystadenocarcinoma | CLRN3     | 0 | -93.927435  |  |
| 20896 | Papillary serous cystadenocarcinoma | REG4      | 0 | -90.9717    |  |
| 20897 | Papillary serous cystadenocarcinoma | KRT20     | 0 | -88.831716  |  |
| 20898 | Papillary serous cystadenocarcinoma | REG1B     | 0 | -85.184926  |  |

|       |                                     |             |   |            |  |
|-------|-------------------------------------|-------------|---|------------|--|
| 20899 | Papillary serous cystadenocarcinoma | TFF3        | 0 | -80.705014 |  |
| 20900 | Papillary serous cystadenocarcinoma | MUC13       | 0 | -71.787252 |  |
| 20901 | Papillary serous cystadenocarcinoma | ZG16        | 0 | -71.087054 |  |
| 20902 | Papillary serous cystadenocarcinoma | C10orf99    | 0 | -69.125517 |  |
| 20903 | Papillary serous cystadenocarcinoma | MUC2        | 0 | -68.86284  |  |
| 20904 | Papillary serous cystadenocarcinoma | CCL14-CCL15 | 0 | -68.72669  |  |
| 20905 | Papillary serous cystadenocarcinoma | NOX1        | 0 | -66.173947 |  |
| 20906 | Papillary serous cystadenocarcinoma | REG1A       | 0 | -61.971075 |  |
| 20907 | Papillary serous cystadenocarcinoma | SPINK1      | 0 | -60.895576 |  |
| 20908 | Papillary serous cystadenocarcinoma | SPINK4      | 0 | -51.233923 |  |
| 20909 | Papillary serous cystadenocarcinoma | REG3A       | 0 | -49.425476 |  |
| 20910 | Papillary serous cystadenocarcinoma | MEP1A       | 0 | -47.882347 |  |
| 20911 | Papillary serous cystadenocarcinoma | MMP3        | 0 | -45.377726 |  |
| 20912 | Papillary serous cystadenocarcinoma | UGT2B17     | 0 | -44.019805 |  |
| 20913 | Papillary serous cystadenocarcinoma | MS4A12      | 0 | -41.249497 |  |
| 20914 | Papillary serous cystadenocarcinoma | TFF1        | 0 | -36.003164 |  |
| 20915 | Papillary serous cystadenocarcinoma | ITLN1       | 0 | -35.803322 |  |
| 20916 | Papillary serous cystadenocarcinoma | RNF128      | 0 | -33.813266 |  |
| 20917 | Papillary serous cystadenocarcinoma | DEFA5       | 0 | -31.955893 |  |
| 20918 | Papillary serous cystadenocarcinoma | ADH1C       | 0 | -30.7402   |  |
| 20919 | Papillary serous cystadenocarcinoma | CDHR5       | 0 | -30.683488 |  |
| 20920 | Papillary serous cystadenocarcinoma | VIL1        | 0 | -29.57058  |  |
| 20921 | Papillary serous cystadenocarcinoma | GPA33       | 0 | -29.191359 |  |
| 20922 | Papillary serous cystadenocarcinoma | CDX1        | 0 | -28.640954 |  |
| 20923 | Papillary serous cystadenocarcinoma | EPS8L3      | 0 | -28.145755 |  |
| 20924 | Papillary serous cystadenocarcinoma | CCL20       | 0 | -27.766552 |  |
| 20925 | Papillary serous cystadenocarcinoma | CDX2        | 0 | -27.762252 |  |
| 20926 | Papillary serous cystadenocarcinoma | ARL14       | 0 | -27.600398 |  |
| 20927 | Papillary serous cystadenocarcinoma | TRIM31      | 0 | -25.821363 |  |
| 20928 | Papillary serous cystadenocarcinoma | NR1I2       | 0 | -25.737503 |  |
| 20929 | Papillary serous cystadenocarcinoma | TSPAN8      | 0 | -25.655004 |  |
| 20930 | Papillary serous cystadenocarcinoma | DUOX2       | 0 | -25.015621 |  |
| 20931 | Papillary serous cystadenocarcinoma | TDGF1       | 0 | -24.871086 |  |
| 20932 | Papillary serous cystadenocarcinoma | CYP2B6      | 0 | -24.538568 |  |
| 20933 | Papillary serous cystadenocarcinoma | MUC3B       | 0 | -24.248161 |  |
| 20934 | Papillary serous cystadenocarcinoma | CLCA4       | 0 | -24.246042 |  |
| 20935 | Papillary serous cystadenocarcinoma | LOC646627   | 0 | -24.110677 |  |
| 20936 | Papillary serous cystadenocarcinoma | GUCY2C      | 0 | -23.741122 |  |
| 20937 | Papillary serous cystadenocarcinoma | PLAC8       | 0 | -23.702882 |  |
| 20938 | Papillary serous cystadenocarcinoma | POF1B       | 0 | -23.469619 |  |
| 20939 | Papillary serous cystadenocarcinoma | DPEP1       | 0 | -23.153817 |  |
| 20940 | Papillary serous cystadenocarcinoma | ATP10B      | 0 | -22.482454 |  |
| 20941 | Papillary serous cystadenocarcinoma | RETNLB      | 0 | -21.523836 |  |
| 20942 | Papillary serous cystadenocarcinoma | NCRNA00261  | 0 | -21.06436  |  |
| 20943 | Papillary serous cystadenocarcinoma | CEACAM1     | 0 | -21.038582 |  |
| 20944 | Papillary serous cystadenocarcinoma | AREG        | 0 | -20.56819  |  |
| 20945 | Papillary serous cystadenocarcinoma | HSD17B2     | 0 | -20.2349   |  |
| 20946 | Papillary serous cystadenocarcinoma | COL17A1     | 0 | -19.819643 |  |
| 20947 | Papillary serous cystadenocarcinoma | HNF4A       | 0 | -19.625474 |  |
| 20948 | Papillary serous cystadenocarcinoma | PIGR        | 0 | -19.236222 |  |

|       |                                     |          |   |            |  |
|-------|-------------------------------------|----------|---|------------|--|
| 20949 | Papillary serous cystadenocarcinoma | ASCL2    | 0 | -19.102645 |  |
| 20950 | Papillary serous cystadenocarcinoma | FAM55D   | 0 | -17.83085  |  |
| 20951 | Papillary serous cystadenocarcinoma | USH1C    | 0 | -17.272388 |  |
| 20952 | Papillary serous cystadenocarcinoma | FUT6     | 0 | -17.213828 |  |
| 20953 | Papillary serous cystadenocarcinoma | FERMT1   | 0 | -16.900577 |  |
| 20954 | Papillary serous cystadenocarcinoma | TOX3     | 0 | -15.604274 |  |
| 20955 | Papillary serous cystadenocarcinoma | TRIM15   | 0 | -15.581619 |  |
| 20956 | Papillary serous cystadenocarcinoma | PRSS3    | 0 | -15.530121 |  |
| 20957 | Papillary serous cystadenocarcinoma | LRRC19   | 0 | -15.392121 |  |
| 20958 | Papillary serous cystadenocarcinoma | RNF186   | 0 | -15.251615 |  |
| 20959 | Papillary serous cystadenocarcinoma | DDC      | 0 | -15.110289 |  |
| 20960 | Papillary serous cystadenocarcinoma | PLA2G2A  | 0 | -14.974467 |  |
| 20961 | Papillary serous cystadenocarcinoma | UGT1A1   | 0 | -14.788082 |  |
| 20962 | Papillary serous cystadenocarcinoma | CELP     | 0 | -14.603192 |  |
| 20963 | Papillary serous cystadenocarcinoma | DSG3     | 0 | -14.453225 |  |
| 20964 | Papillary serous cystadenocarcinoma | LEFTY1   | 0 | -14.376584 |  |
| 20965 | Papillary serous cystadenocarcinoma | AKR1C3   | 0 | -14.248165 |  |
| 20966 | Papillary serous cystadenocarcinoma | C17orf73 | 0 | -13.801599 |  |
| 20967 | Papillary serous cystadenocarcinoma | IGHA1    | 0 | -13.771468 |  |
| 20968 | Papillary serous cystadenocarcinoma | DMBT1    | 0 | -13.565916 |  |
| 20969 | Papillary serous cystadenocarcinoma | PPARG    | 0 | -13.393906 |  |
| 20970 | Papillary serous cystadenocarcinoma | RAPGEFL1 | 0 | -13.189812 |  |
| 20971 | Papillary serous cystadenocarcinoma | HMGCS2   | 0 | -13.030134 |  |
| 20972 | Papillary serous cystadenocarcinoma | TFF2     | 0 | -12.932018 |  |
| 20973 | Papillary serous cystadenocarcinoma | C4BPB    | 0 | -12.376787 |  |
| 20974 | Papillary serous cystadenocarcinoma | UGT2A3   | 0 | -12.178351 |  |
| 20975 | Papillary serous cystadenocarcinoma | ACSL5    | 0 | -12.155901 |  |
| 20976 | Papillary serous cystadenocarcinoma | HEPACAM2 | 0 | -12.142406 |  |
| 20977 | Papillary serous cystadenocarcinoma | SLC39A5  | 0 | -11.938082 |  |
| 20978 | Papillary serous cystadenocarcinoma | AQP8     | 0 | -11.93172  |  |
| 20979 | Papillary serous cystadenocarcinoma | ISX      | 0 | -11.491018 |  |
| 20980 | Papillary serous cystadenocarcinoma | IGJ      | 0 | -11.445576 |  |
| 20981 | Papillary serous cystadenocarcinoma | C2orf89  | 0 | -11.278608 |  |
| 20982 | Papillary serous cystadenocarcinoma | LGR5     | 0 | -11.107126 |  |
| 20983 | Papillary serous cystadenocarcinoma | IYD      | 0 | -11.014753 |  |
| 20984 | Papillary serous cystadenocarcinoma | LY6G6D   | 0 | -10.887675 |  |
| 20985 | Papillary serous cystadenocarcinoma | NAT2     | 0 | -10.441214 |  |
| 20986 | Papillary serous cystadenocarcinoma | CDA      | 0 | -10.359094 |  |
| 20987 | Papillary serous cystadenocarcinoma | ETS2     | 0 | -10.335517 |  |
| 20988 | Papillary serous cystadenocarcinoma | WNK4     | 0 | -10.19815  |  |
| 20989 | Papillary serous cystadenocarcinoma | AGR2     | 0 | -10.189468 |  |
| 20990 | Papillary serous cystadenocarcinoma | ACE2     | 0 | -10.048438 |  |
| 20991 | Papillary serous cystadenocarcinoma | C1orf125 | 0 | -10.009882 |  |
| 20992 | Papillary serous cystadenocarcinoma | MUC17    | 0 | -9.947927  |  |
| 20993 | Papillary serous cystadenocarcinoma | SERPINB5 | 0 | -9.841761  |  |
| 20994 | Papillary serous cystadenocarcinoma | PLS1     | 0 | -9.821578  |  |
| 20995 | Papillary serous cystadenocarcinoma | EREG     | 0 | -9.780134  |  |
| 20996 | Papillary serous cystadenocarcinoma | CFTR     | 0 | -9.694404  |  |
| 20997 | Papillary serous cystadenocarcinoma | PRAP1    | 0 | -9.583558  |  |
| 20998 | Papillary serous cystadenocarcinoma | ARSE     | 0 | -9.513805  |  |

|       |                                     |              |   |           |  |
|-------|-------------------------------------|--------------|---|-----------|--|
| 20999 | Papillary serous cystadenocarcinoma | CST1         | 0 | -9.288534 |  |
| 21000 | Papillary serous cystadenocarcinoma | C2CD4A       | 0 | -9.272186 |  |
| 21001 | Papillary serous cystadenocarcinoma | IL8          | 0 | -9.060437 |  |
| 21002 | Papillary serous cystadenocarcinoma | PCK1         | 0 | -9.055649 |  |
| 21003 | Papillary serous cystadenocarcinoma | GIPC2        | 0 | -9.041035 |  |
| 21004 | Papillary serous cystadenocarcinoma | CHP2         | 0 | -9.036996 |  |
| 21005 | Papillary serous cystadenocarcinoma | LOC100288092 | 0 | -8.902245 |  |
| 21006 | Papillary serous cystadenocarcinoma | SDR16C5      | 0 | -8.870465 |  |
| 21007 | Papillary serous cystadenocarcinoma | PIP5K1B      | 0 | -8.694881 |  |
| 21008 | Papillary serous cystadenocarcinoma | FGFR4        | 0 | -8.671163 |  |
| 21009 | Papillary serous cystadenocarcinoma | BCL2L15      | 0 | -8.669141 |  |
| 21010 | Papillary serous cystadenocarcinoma | IHH          | 0 | -8.565944 |  |
| 21011 | Papillary serous cystadenocarcinoma | LOC283859    | 0 | -8.559038 |  |
| 21012 | Papillary serous cystadenocarcinoma | BCL2L14      | 0 | -8.53957  |  |
| 21013 | Papillary serous cystadenocarcinoma | C13orf18     | 0 | -8.364655 |  |
| 21014 | Papillary serous cystadenocarcinoma | CA4          | 0 | -8.363636 |  |
| 21015 | Papillary serous cystadenocarcinoma | CA2          | 0 | -8.260271 |  |
| 21016 | Papillary serous cystadenocarcinoma | GUCA2A       | 0 | -8.255475 |  |
| 21017 | Papillary serous cystadenocarcinoma | MMP1         | 0 | -8.242392 |  |
| 21018 | Papillary serous cystadenocarcinoma | BTNL8        | 0 | -8.156451 |  |
| 21019 | Papillary serous cystadenocarcinoma | CDCA7        | 0 | -8.093391 |  |
| 21020 | Papillary serous cystadenocarcinoma | HNF4G        | 0 | -8.076875 |  |
| 21021 | Papillary serous cystadenocarcinoma | FLJ32063     | 0 | -7.980502 |  |
| 21022 | Papillary serous cystadenocarcinoma | UGT8         | 0 | -7.913594 |  |
| 21023 | Papillary serous cystadenocarcinoma | BAIAP2L2     | 0 | -7.907898 |  |
| 21024 | Papillary serous cystadenocarcinoma | PLCB4        | 0 | -7.780927 |  |
| 21025 | Papillary serous cystadenocarcinoma | PARM1        | 0 | -7.767468 |  |
| 21026 | Papillary serous cystadenocarcinoma | SLCO1B3      | 0 | -7.756764 |  |
| 21027 | Papillary serous cystadenocarcinoma | CA1          | 0 | -7.695016 |  |
| 21028 | Papillary serous cystadenocarcinoma | ADAMDEC1     | 0 | -7.69323  |  |
| 21029 | Papillary serous cystadenocarcinoma | ITGA2        | 0 | -7.676935 |  |
| 21030 | Papillary serous cystadenocarcinoma | FUT4         | 0 | -7.584596 |  |
| 21031 | Papillary serous cystadenocarcinoma | MYO7B        | 0 | -7.581547 |  |
| 21032 | Papillary serous cystadenocarcinoma | FAM3D        | 0 | -7.574605 |  |
| 21033 | Papillary serous cystadenocarcinoma | CTSE         | 0 | -7.544051 |  |
| 21034 | Papillary serous cystadenocarcinoma | C19orf77     | 0 | -7.541781 |  |
| 21035 | Papillary serous cystadenocarcinoma | CALML4       | 0 | -7.481745 |  |
| 21036 | Papillary serous cystadenocarcinoma | TMEM37       | 0 | -7.330929 |  |
| 21037 | Papillary serous cystadenocarcinoma | FAR2         | 0 | -7.298522 |  |
| 21038 | Papillary serous cystadenocarcinoma | ABCC2        | 0 | -7.245633 |  |
| 21039 | Papillary serous cystadenocarcinoma | SATB2        | 0 | -7.241952 |  |
| 21040 | Papillary serous cystadenocarcinoma | HSD11B2      | 0 | -7.186406 |  |
| 21041 | Papillary serous cystadenocarcinoma | FOXA3        | 0 | -7.145027 |  |
| 21042 | Papillary serous cystadenocarcinoma | TMED6        | 0 | -7.125246 |  |
| 21043 | Papillary serous cystadenocarcinoma | FCGBP        | 0 | -7.091029 |  |
| 21044 | Papillary serous cystadenocarcinoma | SLC25A15     | 0 | -7.082767 |  |
| 21045 | Papillary serous cystadenocarcinoma | FXYD3        | 0 | -7.045833 |  |
| 21046 | Papillary serous cystadenocarcinoma | PNLIPRP2     | 0 | -7.032782 |  |
| 21047 | Papillary serous cystadenocarcinoma | GPR120       | 0 | -7.023061 |  |
| 21048 | Papillary serous cystadenocarcinoma | NQO1         | 0 | -6.895859 |  |



|       |                                     |              |   |           |  |
|-------|-------------------------------------|--------------|---|-----------|--|
| 21049 | Papillary serous cystadenocarcinoma | TFPI         | 0 | -6.7882   |  |
| 21050 | Papillary serous cystadenocarcinoma | DHRS9        | 0 | -6.719865 |  |
| 21051 | Papillary serous cystadenocarcinoma | SLC12A2      | 0 | -6.643269 |  |
| 21052 | Papillary serous cystadenocarcinoma | CHRD12       | 0 | -6.553529 |  |
| 21053 | Papillary serous cystadenocarcinoma | GPR109B      | 0 | -6.448091 |  |
| 21054 | Papillary serous cystadenocarcinoma | FAM84A       | 0 | -6.387531 |  |
| 21055 | Papillary serous cystadenocarcinoma | GMDS         | 0 | -6.38682  |  |
| 21056 | Papillary serous cystadenocarcinoma | HES6         | 0 | -6.380977 |  |
| 21057 | Papillary serous cystadenocarcinoma | CCL18        | 0 | -6.364031 |  |
| 21058 | Papillary serous cystadenocarcinoma | XK           | 0 | -6.362826 |  |
| 21059 | Papillary serous cystadenocarcinoma | FUT3         | 0 | -6.347937 |  |
| 21060 | Papillary serous cystadenocarcinoma | PROX1        | 0 | -6.345763 |  |
| 21061 | Papillary serous cystadenocarcinoma | ABCB1        | 0 | -6.303167 |  |
| 21062 | Papillary serous cystadenocarcinoma | MYO1A        | 0 | -6.250814 |  |
| 21063 | Papillary serous cystadenocarcinoma | PLEK2        | 0 | -6.218339 |  |
| 21064 | Papillary serous cystadenocarcinoma | ITPKA        | 0 | -6.19036  |  |
| 21065 | Papillary serous cystadenocarcinoma | ATP2A3       | 0 | -6.188264 |  |
| 21066 | Papillary serous cystadenocarcinoma | XPNPEP2      | 0 | -6.152923 |  |
| 21067 | Papillary serous cystadenocarcinoma | RNASE4       | 0 | -6.130707 |  |
| 21068 | Papillary serous cystadenocarcinoma | UGT2B15      | 0 | -6.064037 |  |
| 21069 | Papillary serous cystadenocarcinoma | SLC1A7       | 0 | -5.961814 |  |
| 21070 | Papillary serous cystadenocarcinoma | MYB          | 0 | -5.956076 |  |
| 21071 | Papillary serous cystadenocarcinoma | CYP3A5       | 0 | -5.895882 |  |
| 21072 | Papillary serous cystadenocarcinoma | GPSM2        | 0 | -5.889795 |  |
| 21073 | Papillary serous cystadenocarcinoma | TM4SF20      | 0 | -5.863566 |  |
| 21074 | Papillary serous cystadenocarcinoma | SLCO4A1      | 0 | -5.822418 |  |
| 21075 | Papillary serous cystadenocarcinoma | CXCL2        | 0 | -5.806976 |  |
| 21076 | Papillary serous cystadenocarcinoma | L1TD1        | 0 | -5.790944 |  |
| 21077 | Papillary serous cystadenocarcinoma | IL32         | 0 | -5.754097 |  |
| 21078 | Papillary serous cystadenocarcinoma | PTPRH        | 0 | -5.753249 |  |
| 21079 | Papillary serous cystadenocarcinoma | LRP4         | 0 | -5.723495 |  |
| 21080 | Papillary serous cystadenocarcinoma | TINAG        | 0 | -5.668535 |  |
| 21081 | Papillary serous cystadenocarcinoma | PTPRO        | 0 | -5.65315  |  |
| 21082 | Papillary serous cystadenocarcinoma | HEPH         | 0 | -5.62032  |  |
| 21083 | Papillary serous cystadenocarcinoma | LOC100507192 | 0 | -5.613288 |  |
| 21084 | Papillary serous cystadenocarcinoma | ANG          | 0 | -5.612826 |  |
| 21085 | Papillary serous cystadenocarcinoma | SLC6A14      | 0 | -5.601961 |  |
| 21086 | Papillary serous cystadenocarcinoma | C6orf105     | 0 | -5.600973 |  |
| 21087 | Papillary serous cystadenocarcinoma | LOC100505633 | 0 | -5.590267 |  |
| 21088 | Papillary serous cystadenocarcinoma | SLC5A9       | 0 | -5.542619 |  |
| 21089 | Papillary serous cystadenocarcinoma | PCCA         | 0 | -5.535052 |  |
| 21090 | Papillary serous cystadenocarcinoma | FAM55A       | 0 | -5.484236 |  |
| 21091 | Papillary serous cystadenocarcinoma | TRPA1        | 0 | -5.467421 |  |
| 21092 | Papillary serous cystadenocarcinoma | IL1R2        | 0 | -5.456309 |  |
| 21093 | Papillary serous cystadenocarcinoma | NOTUM        | 0 | -5.443763 |  |
| 21094 | Papillary serous cystadenocarcinoma | LOC400573    | 0 | -5.41785  |  |
| 21095 | Papillary serous cystadenocarcinoma | CLDN2        | 0 | -5.403485 |  |
| 21096 | Papillary serous cystadenocarcinoma | MXD1         | 0 | -5.371909 |  |
| 21097 | Papillary serous cystadenocarcinoma | FA2H         | 0 | -5.364683 |  |
| 21098 | Papillary serous cystadenocarcinoma | ADCYAP1      | 0 | -5.354255 |  |

|       |                                     |              |   |           |  |
|-------|-------------------------------------|--------------|---|-----------|--|
| 21099 | Papillary serous cystadenocarcinoma | FIBCD1       | 0 | -5.344777 |  |
| 21100 | Papillary serous cystadenocarcinoma | IL1A         | 0 | -5.302392 |  |
| 21101 | Papillary serous cystadenocarcinoma | BCAN         | 0 | -5.288358 |  |
| 21102 | Papillary serous cystadenocarcinoma | IL22RA1      | 0 | -5.249938 |  |
| 21103 | Papillary serous cystadenocarcinoma | VAV3         | 0 | -5.248442 |  |
| 21104 | Papillary serous cystadenocarcinoma | SDCBP2       | 0 | -5.241698 |  |
| 21105 | Papillary serous cystadenocarcinoma | EDN3         | 0 | -5.214098 |  |
| 21106 | Papillary serous cystadenocarcinoma | A1CF         | 0 | -5.152207 |  |
| 21107 | Papillary serous cystadenocarcinoma | ITGA6        | 0 | -5.109066 |  |
| 21108 | Papillary serous cystadenocarcinoma | CXCL6        | 0 | -5.023301 |  |
| 21109 | Papillary serous cystadenocarcinoma | RNF43        | 0 | -5.005845 |  |
| 21110 | Papillary serous cystadenocarcinoma | IGHG1        | 0 | -4.97945  |  |
| 21111 | Papillary serous cystadenocarcinoma | DNASE1L3     | 0 | -4.974289 |  |
| 21112 | Papillary serous cystadenocarcinoma | TMEM54       | 0 | -4.970318 |  |
| 21113 | Papillary serous cystadenocarcinoma | SMAGP        | 0 | -4.963428 |  |
| 21114 | Papillary serous cystadenocarcinoma | SKP2         | 0 | -4.918784 |  |
| 21115 | Papillary serous cystadenocarcinoma | TRPM6        | 0 | -4.906221 |  |
| 21116 | Papillary serous cystadenocarcinoma | GSDMB        | 0 | -4.897099 |  |
| 21117 | Papillary serous cystadenocarcinoma | LOC100240728 | 0 | -4.895336 |  |
| 21118 | Papillary serous cystadenocarcinoma | GAL          | 0 | -4.891549 |  |
| 21119 | Papillary serous cystadenocarcinoma | F2RL1        | 0 | -4.888513 |  |
| 21120 | Papillary serous cystadenocarcinoma | KIF21B       | 0 | -4.880464 |  |
| 21121 | Papillary serous cystadenocarcinoma | GGH          | 0 | -4.872245 |  |
| 21122 | Papillary serous cystadenocarcinoma | CKMT1A       | 0 | -4.812564 |  |
| 21123 | Papillary serous cystadenocarcinoma | PPP1R14D     | 0 | -4.785523 |  |
| 21124 | Papillary serous cystadenocarcinoma | PTGER4       | 0 | -4.736591 |  |
| 21125 | Papillary serous cystadenocarcinoma | RARA         | 0 | -4.704798 |  |
| 21126 | Papillary serous cystadenocarcinoma | GNG4         | 0 | -4.681705 |  |
| 21127 | Papillary serous cystadenocarcinoma | AKR1C2       | 0 | -4.673443 |  |
| 21128 | Papillary serous cystadenocarcinoma | LOC285943    | 0 | -4.569348 |  |
| 21129 | Papillary serous cystadenocarcinoma | PLA2G10      | 0 | -4.565407 |  |
| 21130 | Papillary serous cystadenocarcinoma | HOXB9        | 0 | -4.549691 |  |
| 21131 | Papillary serous cystadenocarcinoma | CLC          | 0 | -4.537395 |  |
| 21132 | Papillary serous cystadenocarcinoma | GREM1        | 0 | -4.536038 |  |
| 21133 | Papillary serous cystadenocarcinoma | TST          | 0 | -4.5328   |  |
| 21134 | Papillary serous cystadenocarcinoma | ACSL6        | 0 | -4.494898 |  |
| 21135 | Papillary serous cystadenocarcinoma | GNLY         | 0 | -4.4667   |  |
| 21136 | Papillary serous cystadenocarcinoma | CES2         | 0 | -4.44194  |  |
| 21137 | Papillary serous cystadenocarcinoma | NEK3         | 0 | -4.431147 |  |
| 21138 | Papillary serous cystadenocarcinoma | KBTBD11      | 0 | -4.41862  |  |
| 21139 | Papillary serous cystadenocarcinoma | ANKRD22      | 0 | -4.400059 |  |
| 21140 | Papillary serous cystadenocarcinoma | CYP2S1       | 0 | -4.396895 |  |
| 21141 | Papillary serous cystadenocarcinoma | SLC44A3      | 0 | -4.368096 |  |
| 21142 | Papillary serous cystadenocarcinoma | TESC         | 0 | -4.334812 |  |
| 21143 | Papillary serous cystadenocarcinoma | F2RL2        | 0 | -4.329708 |  |
| 21144 | Papillary serous cystadenocarcinoma | ALDH1A1      | 0 | -4.328879 |  |
| 21145 | Papillary serous cystadenocarcinoma | F12          | 0 | -4.32808  |  |
| 21146 | Papillary serous cystadenocarcinoma | FLJ22763     | 0 | -4.219927 |  |
| 21147 | Papillary serous cystadenocarcinoma | GPR128       | 0 | -4.206215 |  |
| 21148 | Papillary serous cystadenocarcinoma | JPH1         | 0 | -4.165232 |  |

|       |                                     |              |   |           |  |
|-------|-------------------------------------|--------------|---|-----------|--|
| 21149 | Papillary serous cystadenocarcinoma | LOC100288781 | 0 | -4.107346 |  |
| 21150 | Papillary serous cystadenocarcinoma | CA12         | 0 | -4.103773 |  |
| 21151 | Papillary serous cystadenocarcinoma | HAVCR2       | 0 | -4.053819 |  |
| 21152 | Papillary serous cystadenocarcinoma | STAMBPL1     | 0 | -4.043653 |  |
| 21153 | Papillary serous cystadenocarcinoma | CMBL         | 0 | -4.037797 |  |
| 21154 | Papillary serous cystadenocarcinoma | TPSG1        | 0 | -4.034993 |  |
| 21155 | Papillary serous cystadenocarcinoma | ATP5O        | 0 | -4.016376 |  |
| 21156 | Papillary serous cystadenocarcinoma | AKR1C1       | 0 | -4.014038 |  |
| 21157 | Papillary serous cystadenocarcinoma | GRTP1        | 0 | -4.012883 |  |
| 21158 | Papillary serous cystadenocarcinoma | IL1B         | 0 | -4.007051 |  |
| 21159 | Papillary serous cystadenocarcinoma | MTMR11       | 0 | -3.99614  |  |
| 21160 | Papillary serous cystadenocarcinoma | CTLA4        | 0 | -3.976031 |  |
| 21161 | Papillary serous cystadenocarcinoma | IL2RG        | 0 | -3.919462 |  |
| 21162 | Papillary serous cystadenocarcinoma | ENPP3        | 0 | -3.772192 |  |
| 21163 | Papillary serous cystadenocarcinoma | GLRX         | 0 | -3.698391 |  |
| 21164 | Papillary serous cystadenocarcinoma | BIRC3        | 0 | -3.685867 |  |
| 21165 | Papillary serous cystadenocarcinoma | LOC653602    | 0 | -3.659397 |  |
| 21166 | Papillary serous cystadenocarcinoma | SLC26A2      | 0 | -3.655878 |  |
| 21167 | Papillary serous cystadenocarcinoma | SLCO2B1      | 0 | -3.635006 |  |
| 21168 | Papillary serous cystadenocarcinoma | PDZD3        | 0 | -3.583991 |  |
| 21169 | Papillary serous cystadenocarcinoma | MYO1D        | 0 | -3.54547  |  |
| 21170 | Papillary serous cystadenocarcinoma | AIFM3        | 0 | -3.537869 |  |
| 21171 | Papillary serous cystadenocarcinoma | PIWIL1       | 0 | -3.508169 |  |
| 21172 | Papillary serous cystadenocarcinoma | SLC13A3      | 0 | -3.499762 |  |
| 21173 | Papillary serous cystadenocarcinoma | NRARP        | 0 | -3.494361 |  |
| 21174 | Papillary serous cystadenocarcinoma | PBLD         | 0 | -3.443629 |  |
| 21175 | Papillary serous cystadenocarcinoma | APOBEC1      | 0 | -3.434815 |  |
| 21176 | Papillary serous cystadenocarcinoma | SEMA4G       | 0 | -3.426409 |  |
| 21177 | Papillary serous cystadenocarcinoma | PIGZ         | 0 | -3.376707 |  |
| 21178 | Papillary serous cystadenocarcinoma | NHSL1        | 0 | -3.355764 |  |
| 21179 | Papillary serous cystadenocarcinoma | C19orf6      | 0 | -3.328838 |  |
| 21180 | Papillary serous cystadenocarcinoma | ME1          | 0 | -3.286947 |  |
| 21181 | Papillary serous cystadenocarcinoma | AHCYL2       | 0 | -3.274456 |  |
| 21182 | Papillary serous cystadenocarcinoma | P2RY14       | 0 | -3.179148 |  |
| 21183 | Papillary serous cystadenocarcinoma | FOXP2        | 0 | -3.149431 |  |
| 21184 | Papillary serous cystadenocarcinoma | FGGY         | 0 | -3.148795 |  |
| 21185 | Papillary serous cystadenocarcinoma | C4orf19      | 0 | -3.147037 |  |
| 21186 | Papillary serous cystadenocarcinoma | FLJ40292     | 0 | -3.123327 |  |
| 21187 | Papillary serous cystadenocarcinoma | IL3RA        | 0 | -3.122227 |  |
| 21188 | Papillary serous cystadenocarcinoma | EPB41L2      | 0 | -3.040553 |  |
| 21189 | Papillary serous cystadenocarcinoma | LOC25845     | 0 | -3.036608 |  |
| 21190 | Papillary serous cystadenocarcinoma | IMPA2        | 0 | -3.011284 |  |
| 21191 | Papillary serous cystadenocarcinoma | ETHE1        | 0 | -2.910183 |  |
| 21192 | Papillary serous cystadenocarcinoma | ASL          | 0 | -2.909534 |  |
| 21193 | Papillary serous cystadenocarcinoma | HR           | 0 | -2.903201 |  |
| 21194 | Papillary serous cystadenocarcinoma | LONRF3       | 0 | -2.893128 |  |
| 21195 | Papillary serous cystadenocarcinoma | AKR7A3       | 0 | -2.838918 |  |
| 21196 | Papillary serous cystadenocarcinoma | GNE          | 0 | -2.835651 |  |
| 21197 | Papillary serous cystadenocarcinoma | EGFR         | 0 | -2.750207 |  |
| 21198 | Papillary serous cystadenocarcinoma | FMO5         | 0 | -2.739365 |  |

|       |                                     |          |   |            |  |
|-------|-------------------------------------|----------|---|------------|--|
| 21199 | Papillary serous cystadenocarcinoma | SOD2     | 0 | -2.716685  |  |
| 21200 | Papillary serous cystadenocarcinoma | UNC5CL   | 0 | -2.704416  |  |
| 21201 | Papillary serous cystadenocarcinoma | ANKRD57  | 0 | -2.646314  |  |
| 21202 | Papillary serous cystadenocarcinoma | LIMA1    | 0 | -2.637912  |  |
| 21203 | Papillary serous cystadenocarcinoma | FRYL     | 0 | -2.610084  |  |
| 21204 | Papillary serous cystadenocarcinoma | KITLG    | 0 | -2.576882  |  |
| 21205 | Papillary serous cystadenocarcinoma | ACOT7    | 0 | -2.537887  |  |
| 21206 | Papillary serous cystadenocarcinoma | MAP2K6   | 0 | -2.483627  |  |
| 21207 | Papillary serous cystadenocarcinoma | LASS6    | 0 | -2.465355  |  |
| 21208 | Papillary serous cystadenocarcinoma | ZAK      | 0 | -2.423467  |  |
| 21209 | Papillary serous cystadenocarcinoma | C13orf23 | 0 | -2.419734  |  |
| 21210 | Papillary serous cystadenocarcinoma | PDSS1    | 0 | -2.416681  |  |
| 21211 | Papillary serous cystadenocarcinoma | PSMG1    | 0 | -2.378961  |  |
| 21212 | Papillary serous cystadenocarcinoma | RFC3     | 0 | -2.309583  |  |
| 21213 | Papillary serous cystadenocarcinoma | MYO15B   | 0 | -2.295333  |  |
| 21214 | Papillary serous cystadenocarcinoma | FAM102B  | 0 | -2.292164  |  |
| 21215 | Papillary serous cystadenocarcinoma | LLGL2    | 0 | -2.185846  |  |
| 21216 | Papillary serous cystadenocarcinoma | PRKAB1   | 0 | -2.01549   |  |
| 21217 | polyps                              | GAS1     | 0 | -14.683724 |  |
| 21218 | polyps                              | SPP1     | 0 | -7.837025  |  |
| 21219 | polyps                              | ITGBL1   | 0 | -7.765214  |  |
| 21220 | polyps                              | COL10A1  | 0 | -7.354644  |  |
| 21221 | polyps                              | THBS2    | 0 | -6.932078  |  |
| 21222 | polyps                              | ASPN     | 0 | -6.83853   |  |
| 21223 | polyps                              | APOE     | 0 | -6.196602  |  |
| 21224 | polyps                              | FN1      | 0 | -5.770918  |  |
| 21225 | polyps                              | MYL9     | 0 | -5.516397  |  |
| 21226 | polyps                              | MGP      | 0 | -5.433495  |  |
| 21227 | polyps                              | TNS1     | 0 | -4.91218   |  |
| 21228 | polyps                              | PTGIS    | 0 | -4.689587  |  |
| 21229 | polyps                              | BGN      | 0 | -4.533275  |  |
| 21230 | polyps                              | FXVD6    | 0 | -4.50632   |  |
| 21231 | polyps                              | C3       | 0 | -4.302186  |  |
| 21232 | polyps                              | TAGLN    | 0 | -4.205107  |  |
| 21233 | polyps                              | EHD2     | 0 | -4.170181  |  |
| 21234 | polyps                              | HOPX     | 0 | -4.126677  |  |
| 21235 | polyps                              | NNMT     | 0 | -3.947345  |  |
| 21236 | polyps                              | TPM2     | 0 | -3.946697  |  |
| 21237 | polyps                              | RBMS1    | 0 | -3.913365  |  |
| 21238 | polyps                              | CYP1B1   | 0 | -3.895219  |  |
| 21239 | polyps                              | WWC2     | 0 | -3.875849  |  |
| 21240 | polyps                              | ZCCHC24  | 0 | -3.8594    |  |
| 21241 | polyps                              | FLNA     | 0 | -3.857171  |  |
| 21242 | polyps                              | EPHA3    | 0 | -3.740391  |  |
| 21243 | polyps                              | PDLIM3   | 0 | -3.735855  |  |
| 21244 | polyps                              | AKAP12   | 0 | -3.682323  |  |
| 21245 | polyps                              | AEBP1    | 0 | -3.641108  |  |
| 21246 | polyps                              | MEIS1    | 0 | -3.628587  |  |
| 21247 | polyps                              | RDX      | 0 | -3.584285  |  |
| 21248 | polyps                              | EDNRA    | 0 | -3.569713  |  |

|       |        |          |   |           |  |
|-------|--------|----------|---|-----------|--|
| 21249 | polyps | CALD1    | 0 | -3.55865  |  |
| 21250 | polyps | FBLN2    | 0 | -3.532621 |  |
| 21251 | polyps | GPNMB    | 0 | -3.49659  |  |
| 21252 | polyps | TRPC1    | 0 | -3.402634 |  |
| 21253 | polyps | FERMT2   | 0 | -3.377365 |  |
| 21254 | polyps | TIMP3    | 0 | -3.311889 |  |
| 21255 | polyps | COX7A1   | 0 | -3.31043  |  |
| 21256 | polyps | NTM      | 0 | -3.265553 |  |
| 21257 | polyps | WWTR1    | 0 | -3.201305 |  |
| 21258 | polyps | DCN      | 0 | -3.198334 |  |
| 21259 | polyps | RAB31    | 0 | -3.194913 |  |
| 21260 | polyps | VCAN     | 0 | -3.172125 |  |
| 21261 | polyps | EGR2     | 0 | -3.133039 |  |
| 21262 | polyps | PTRF     | 0 | -3.122768 |  |
| 21263 | polyps | COL6A2   | 0 | -3.10088  |  |
| 21264 | polyps | SPARC    | 0 | -3.076194 |  |
| 21265 | polyps | DDR2     | 0 | -3.058948 |  |
| 21266 | polyps | PDLIM7   | 0 | -3.056306 |  |
| 21267 | polyps | COL18A1  | 0 | -3.050161 |  |
| 21268 | polyps | SERPINF1 | 0 | -2.93389  |  |
| 21269 | polyps | NRP1     | 0 | -2.931343 |  |
| 21270 | polyps | WASF3    | 0 | -2.925762 |  |
| 21271 | polyps | LOX      | 0 | -2.872032 |  |
| 21272 | polyps | TUBB6    | 0 | -2.795967 |  |
| 21273 | polyps | QKI      | 0 | -2.78205  |  |
| 21274 | polyps | LTBP3    | 0 | -2.767249 |  |
| 21275 | polyps | PRELP    | 0 | -2.741759 |  |
| 21276 | polyps | HTRA1    | 0 | -2.725609 |  |
| 21277 | polyps | MAFB     | 0 | -2.717956 |  |
| 21278 | polyps | C1S      | 0 | -2.701801 |  |
| 21279 | polyps | SDC2     | 0 | -2.684277 |  |
| 21280 | polyps | DPYD     | 0 | -2.67381  |  |
| 21281 | polyps | NR3C1    | 0 | -2.642954 |  |
| 21282 | polyps | MYH10    | 0 | -2.624618 |  |
| 21283 | polyps | GPR124   | 0 | -2.607536 |  |
| 21284 | polyps | EFEMP1   | 0 | -2.527422 |  |
| 21285 | polyps | RUNX1T1  | 0 | -2.527036 |  |
| 21286 | polyps | ZEB2     | 0 | -2.508715 |  |
| 21287 | polyps | NOTCH3   | 0 | -2.50001  |  |
| 21288 | polyps | DZIP1    | 0 | -2.453138 |  |
| 21289 | polyps | KIAA1462 | 0 | -2.44757  |  |
| 21290 | polyps | MAP1B    | 0 | -2.434164 |  |
| 21291 | polyps | AKAP2    | 0 | -2.428331 |  |
| 21292 | polyps | RAI14    | 0 | -2.419962 |  |
| 21293 | polyps | OLFML2B  | 0 | -2.398179 |  |
| 21294 | polyps | ZEB1     | 0 | -2.392731 |  |
| 21295 | polyps | SYNE1    | 0 | -2.383231 |  |
| 21296 | polyps | LHFP     | 0 | -2.378204 |  |
| 21297 | polyps | FGFR1    | 0 | -2.375    |  |
| 21298 | polyps | NOX4     | 0 | -2.361673 |  |

|       |                      |             |          |           |  |
|-------|----------------------|-------------|----------|-----------|--|
| 21299 | polyps               | ACTA2       | 0        | -2.357686 |  |
| 21300 | polyps               | NPTXR       | 0        | -2.340919 |  |
| 21301 | polyps               | ZFPM2       | 0        | -2.312991 |  |
| 21302 | polyps               | PXDN        | 0        | -2.282177 |  |
| 21303 | polyps               | CBX6        | 0        | -2.275591 |  |
| 21304 | polyps               | JAM3        | 0        | -2.261724 |  |
| 21305 | polyps               | MEG3        | 0        | -2.257411 |  |
| 21306 | polyps               | COL4A2      | 0        | -2.255471 |  |
| 21307 | polyps               | RASSF4      | 0        | -2.238971 |  |
| 21308 | polyps               | NXN         | 0        | -2.220724 |  |
| 21309 | polyps               | GUCY1B3     | 0        | -2.217627 |  |
| 21310 | polyps               | FADS3       | 0        | -2.190039 |  |
| 21311 | polyps               | MSN         | 0        | -2.189906 |  |
| 21312 | polyps               | ECM2        | 0        | -2.18759  |  |
| 21313 | polyps               | MAF         | 0        | -2.164818 |  |
| 21314 | polyps               | NCF2        | 0        | -2.163869 |  |
| 21315 | polyps               | ITGAM       | 0        | -2.163429 |  |
| 21316 | polyps               | PRNP        | 0        | -2.162198 |  |
| 21317 | polyps               | CDK14       | 0        | -2.16181  |  |
| 21318 | polyps               | IQCJ-SCHIP1 | 0        | -2.159421 |  |
| 21319 | polyps               | PBX3        | 0        | -2.148824 |  |
| 21320 | polyps               | AKT3        | 0        | -2.147263 |  |
| 21321 | polyps               | PDLIM2      | 0        | -2.144072 |  |
| 21322 | polyps               | SIRPA       | 0        | -2.14184  |  |
| 21323 | polyps               | MPDZ        | 0        | -2.127208 |  |
| 21324 | polyps               | FSTL3       | 0        | -2.123976 |  |
| 21325 | polyps               | BCL6        | 0        | -2.109224 |  |
| 21326 | polyps               | TCF4        | 0        | -2.095243 |  |
| 21327 | polyps               | HSPG2       | 0        | -2.093501 |  |
| 21328 | polyps               | CEP170      | 0        | -2.081822 |  |
| 21329 | polyps               | ELTD1       | 0        | -2.080908 |  |
| 21330 | polyps               | GUCY1A3     | 0        | -2.080711 |  |
| 21331 | polyps               | GPC1        | 0        | -2.047464 |  |
| 21332 | polyps               | FLRT2       | 0        | -2.034747 |  |
| 21333 | polyps               | PKD2        | 0        | -2.026586 |  |
| 21334 | polyps               | CTSL1       | 0        | -2.01876  |  |
| 21335 | polyps               | CHST15      | 0        | -2.0099   |  |
| 21336 | Primary Cell Culture | MAP7        | 0.000652 | -7.749575 |  |
| 21337 | Primary Cell Culture | MAPK13      | 0.000093 | -5.139744 |  |
| 21338 | Primary Cell Culture | ROD1        | 0.000155 | -4.802888 |  |
| 21339 | Primary Cell Culture | RAB3IP      | 0.000218 | -4.603243 |  |
| 21340 | Primary Cell Culture | WWP1        | 0.000529 | -3.9455   |  |
| 21341 | Primary Cell Culture | RNASET2     | 0.000088 | -3.751019 |  |
| 21342 | Primary Cell Culture | PPFIBP2     | 0.000541 | -3.362162 |  |
| 21343 | Primary Cell Culture | BAZ2B       | 0.000375 | -3.040968 |  |
| 21344 | Primary Cell Culture | CYP2R1      | 0.000348 | -2.97435  |  |
| 21345 | Primary Cell Culture | PHIP        | 0.00018  | -2.916824 |  |
| 21346 | Primary Cell Culture | OCIAD2      | 0.000516 | -2.862596 |  |
| 21347 | Primary Cell Culture | SYK         | 0.000144 | -2.815386 |  |
| 21348 | Primary Cell Culture | KIF21A      | 0.000493 | -2.764031 |  |

|       |                      |           |          |           |  |
|-------|----------------------|-----------|----------|-----------|--|
| 21349 | Primary Cell Culture | LOC387921 | 0.000603 | -2.703054 |  |
| 21350 | Primary Cell Culture | SLC25A5   | 0.000533 | -2.551182 |  |
| 21351 | Primary Cell Culture | MRPS35    | 0.000166 | -2.52774  |  |
| 21352 | Primary Cell Culture | PPIG      | 0.000425 | -2.505525 |  |
| 21353 | Primary Cell Culture | GUSB      | 0.00007  | -2.451689 |  |
| 21354 | Primary Cell Culture | ANXA4     | 0.000425 | -2.440149 |  |
| 21355 | Primary Cell Culture | ZNF165    | 0.000062 | -2.402117 |  |
| 21356 | Primary Cell Culture | TMEM41B   | 0.000615 | -2.399405 |  |
| 21357 | Primary Cell Culture | ZNF721    | 0.000664 | -2.377136 |  |
| 21358 | Primary Cell Culture | ZNF800    | 0.000597 | -2.347068 |  |
| 21359 | Primary Cell Culture | C4ORF16   | 0.000093 | -2.332935 |  |
| 21360 | Primary Cell Culture | FLJ34969  | 0.000597 | -2.282324 |  |
| 21361 | Primary Cell Culture | CCDC76    | 0.000599 | -2.225771 |  |
| 21362 | Primary Cell Culture | TARDBP    | 0.000574 | -2.221869 |  |
| 21363 | Primary Cell Culture | RNF141    | 0.000516 | -2.206677 |  |
| 21364 | Primary Cell Culture | C11ORF71  | 0.000545 | -2.102567 |  |
| 21365 | Primary Cell Culture | RPS24     | 0.000286 | -2.072647 |  |
| 21366 | Primary Cell Culture | DGKD      | 0.000219 | -2.026221 |  |
| 21367 | Primary Cell Culture | RPL5      | 0.000282 | -2.004885 |  |
| 21368 | Primary Cell Culture | RGS10     | 0.000375 | 2.006736  |  |
| 21369 | Primary Cell Culture | CCDC127   | 0.000514 | 2.023144  |  |
| 21370 | Primary Cell Culture | RBMS2     | 0.000284 | 2.071696  |  |
| 21371 | Primary Cell Culture | TNFAIP1   | 0.000398 | 2.089194  |  |
| 21372 | Primary Cell Culture | GAPDH     | 0.000425 | 2.158625  |  |
| 21373 | Primary Cell Culture | ADAMTSL5  | 0.000486 | 2.27493   |  |
| 21374 | Primary Cell Culture | NPR2      | 0.000399 | 2.282587  |  |
| 21375 | Primary Cell Culture | SDF4      | 0.000665 | 2.289924  |  |
| 21376 | Primary Cell Culture | MST150    | 0.000125 | 2.311495  |  |
| 21377 | Primary Cell Culture | SEC22C    | 0.000369 | 2.345013  |  |
| 21378 | Primary Cell Culture | NTAN1     | 0.00061  | 2.400488  |  |
| 21379 | Primary Cell Culture | RIC8A     | 0.000436 | 2.464435  |  |
| 21380 | Primary Cell Culture | ZBTB4     | 0.000201 | 2.481596  |  |
| 21381 | Primary Cell Culture | SLC35E1   | 0.000436 | 2.585884  |  |
| 21382 | Primary Cell Culture | PNMA1     | 0.000603 | 2.646874  |  |
| 21383 | Primary Cell Culture | ABI2      | 0.000191 | 2.657783  |  |
| 21384 | Primary Cell Culture | PVRL2     | 0.000187 | 2.739545  |  |
| 21385 | Primary Cell Culture | M-RIP     | 0.000292 | 2.875153  |  |
| 21386 | Primary Cell Culture | MPV17     | 0.000334 | 2.87788   |  |
| 21387 | Primary Cell Culture | SPARC     | 0.000665 | 2.977244  |  |
| 21388 | Primary Cell Culture | EXT1      | 0.000425 | 3.142807  |  |
| 21389 | Primary Cell Culture | DYRK3     | 0.000062 | 3.199536  |  |
| 21390 | Primary Cell Culture | TCEAL3    | 0.000602 | 3.283354  |  |
| 21391 | Primary Cell Culture | VKORC1    | 0.000031 | 3.288607  |  |
| 21392 | Primary Cell Culture | TPM1      | 0.000436 | 3.396558  |  |
| 21393 | Primary Cell Culture | KIAA1754  | 0.000235 | 3.642638  |  |
| 21394 | Primary Cell Culture | HSPB2     | 0.000603 | 3.783672  |  |
| 21395 | Primary Cell Culture | FKSG30    | 0.000436 | 3.868274  |  |
| 21396 | Primary Cell Culture | MYADM     | 0.000189 | 3.982227  |  |
| 21397 | Primary Cell Culture | DFNA5     | 0.000086 | 4.008277  |  |
| 21398 | Primary Cell Culture | PELO      | 0.000599 | 4.297751  |  |

|       |                      |           |          |             |  |
|-------|----------------------|-----------|----------|-------------|--|
| 21399 | Primary Cell Culture | RAB6IP1   | 0.000219 | 4.356722    |  |
| 21400 | Primary Cell Culture | NINJ1     | 0.00058  | 4.385068    |  |
| 21401 | Primary Cell Culture | GABARAPL1 | 0.000031 | 4.474687    |  |
| 21402 | Primary Cell Culture | ACTN1     | 0.000001 | 4.790828    |  |
| 21403 | Primary Cell Culture | MSN       | 0.000155 | 4.827876    |  |
| 21404 | Primary Cell Culture | VIM       | 0.000441 | 4.942041    |  |
| 21405 | Primary Cell Culture | ACTA2     | 0.000155 | 5.024653    |  |
| 21406 | Primary Cell Culture | CYR61     | 0.000093 | 5.299898    |  |
| 21407 | Primary Cell Culture | DEGS1     | 0.000035 | 5.682363    |  |
| 21408 | Primary Cell Culture | LGALS1    | 0.000071 | 5.933415    |  |
| 21409 | Primary Cell Culture | NGFRAP1   | 0.000501 | 6.226585    |  |
| 21410 | Primary Cell Culture | COL1A2    | 0.000375 | 10.191927   |  |
| 21411 | Primary Cell Culture | FAM20C    | 0.000468 | 10.313947   |  |
| 21412 | Primary Cell Culture | DKK3      | 0.000597 | 10.416492   |  |
| 21413 | Primary Cell Culture | VASN      | 0.000441 | 12.264142   |  |
| 21414 | Primary Neoplasm     | LOC646014 | 0.000324 | -520.819672 |  |
| 21415 | Primary Neoplasm     | CA1       | 0        | -179.066282 |  |
| 21416 | Primary Neoplasm     | GUCA2A    | 0        | -60.339935  |  |
| 21417 | Primary Neoplasm     | SLC26A3   | 0        | -49.393405  |  |
| 21418 | Primary Neoplasm     | AAAS      | 0        | -40.694998  |  |
| 21419 | Primary Neoplasm     | EYA2      | 0        | -31.798124  |  |
| 21420 | Primary Neoplasm     | LRRN5     | 0        | -26.292493  |  |
| 21421 | Primary Neoplasm     | LOC388886 | 0        | -22.29625   |  |
| 21422 | Primary Neoplasm     | APG4B     | 0        | -20.338664  |  |
| 21423 | Primary Neoplasm     | HPGD      | 0.000319 | -20.107995  |  |
| 21424 | Primary Neoplasm     | TNFRSF10B | 0        | -20.038294  |  |
| 21425 | Primary Neoplasm     | CEACAM7   | 0        | -18.883814  |  |
| 21426 | Primary Neoplasm     | FLJ21511  | 0        | -18.632775  |  |
| 21427 | Primary Neoplasm     | BTNL2     | 0        | -17.91367   |  |
| 21428 | Primary Neoplasm     | PKIB      | 0        | -15.838691  |  |
| 21429 | Primary Neoplasm     | HRP8BP    | 0        | -12.675516  |  |
| 21430 | Primary Neoplasm     | C17orf27  | 0        | -12.373756  |  |
| 21431 | Primary Neoplasm     | MGC12966  | 0        | -12.008485  |  |
| 21432 | Primary Neoplasm     | KRT3      | 0        | -11.681813  |  |
| 21433 | Primary Neoplasm     | CA12      | 0        | -11.253557  |  |
| 21434 | Primary Neoplasm     | LOC56920  | 0        | -10.21857   |  |
| 21435 | Primary Neoplasm     | TNFRSF25  | 0        | -9.667726   |  |
| 21436 | Primary Neoplasm     | MRGX3     | 0        | -9.507378   |  |
| 21437 | Primary Neoplasm     | GGTLA1    | 0        | -9.421108   |  |
| 21438 | Primary Neoplasm     | UGT1A10   | 0        | -8.892093   |  |
| 21439 | Primary Neoplasm     | CFLAR     | 0        | -8.826995   |  |
| 21440 | Primary Neoplasm     | USP49     | 0        | -8.785469   |  |
| 21441 | Primary Neoplasm     | AQP3      | 0        | -8.176899   |  |
| 21442 | Primary Neoplasm     | VPS18     | 0        | -8.11852    |  |
| 21443 | Primary Neoplasm     | UPK3B     | 0        | -8.112432   |  |
| 21444 | Primary Neoplasm     | EZR       | 0.000093 | -7.689489   |  |
| 21445 | Primary Neoplasm     | ABCD1     | 0        | -7.582764   |  |
| 21446 | Primary Neoplasm     | PLCL3     | 0        | -7.529323   |  |
| 21447 | Primary Neoplasm     | CNKSR1    | 0        | -7.218778   |  |
| 21448 | Primary Neoplasm     | UAP1L1    | 0        | -7.166103   |  |



|       |                  |             |          |           |  |
|-------|------------------|-------------|----------|-----------|--|
| 21449 | Primary Neoplasm | OTOP2       | 0        | -7.094136 |  |
| 21450 | Primary Neoplasm | DTX2        | 0        | -6.994055 |  |
| 21451 | Primary Neoplasm | MMRN1       | 0.000018 | -6.936042 |  |
| 21452 | Primary Neoplasm | ADH1C       | 0        | -6.643184 |  |
| 21453 | Primary Neoplasm | PDCD1       | 0        | -6.466146 |  |
| 21454 | Primary Neoplasm | NGFR        | 0        | -6.422489 |  |
| 21455 | Primary Neoplasm | ARMC7       | 0        | -6.268626 |  |
| 21456 | Primary Neoplasm | ADH4        | 0        | -5.622253 |  |
| 21457 | Primary Neoplasm | GPR155      | 0        | -5.270132 |  |
| 21458 | Primary Neoplasm | GPR126      | 0        | -5.042823 |  |
| 21459 | Primary Neoplasm | FLJ43855    | 0        | -4.95643  |  |
| 21460 | Primary Neoplasm | LOC149134   | 0.000056 | -4.789165 |  |
| 21461 | Primary Neoplasm | TTR         | 0.000004 | -4.645625 |  |
| 21462 | Primary Neoplasm | CFHR1       | 0        | -4.520135 |  |
| 21463 | Primary Neoplasm | RIPK3       | 0        | -4.484363 |  |
| 21464 | Primary Neoplasm | TF          | 0.000015 | -4.271676 |  |
| 21465 | Primary Neoplasm | ACAT1       | 0        | -4.24978  |  |
| 21466 | Primary Neoplasm | UGT2B4      | 0        | -4.116567 |  |
| 21467 | Primary Neoplasm | JMJD2C      | 0.000278 | -4.077496 |  |
| 21468 | Primary Neoplasm | HERPUD1     | 0        | -4.065191 |  |
| 21469 | Primary Neoplasm | hCG_1776259 | 0.000229 | -4.051954 |  |
| 21470 | Primary Neoplasm | PDK4        | 0.000289 | -4.038259 |  |
| 21471 | Primary Neoplasm | UGT2B7      | 0        | -3.964991 |  |
| 21472 | Primary Neoplasm | SLC4A4      | 0        | -3.958086 |  |
| 21473 | Primary Neoplasm | ISYNA1      | 0        | -3.926594 |  |
| 21474 | Primary Neoplasm | PCK1        | 0        | -3.913386 |  |
| 21475 | Primary Neoplasm | CXCL12      | 0        | -3.91019  |  |
| 21476 | Primary Neoplasm | GLUD1       | 0.000349 | -3.895446 |  |
| 21477 | Primary Neoplasm | CFH         | 0        | -3.78256  |  |
| 21478 | Primary Neoplasm | C20orf98    | 0        | -3.688656 |  |
| 21479 | Primary Neoplasm | TEP1        | 0.000306 | -3.688525 |  |
| 21480 | Primary Neoplasm | GHSR        | 0        | -3.655671 |  |
| 21481 | Primary Neoplasm | PIGQ        | 0        | -3.559043 |  |
| 21482 | Primary Neoplasm | GC          | 0.000002 | -3.48362  |  |
| 21483 | Primary Neoplasm | TBRG1       | 0.0001   | -3.460295 |  |
| 21484 | Primary Neoplasm | PAX1        | 0        | -3.43594  |  |
| 21485 | Primary Neoplasm | MATN1       | 0        | -3.416291 |  |
| 21486 | Primary Neoplasm | MCART1      | 0        | -3.412675 |  |
| 21487 | Primary Neoplasm | APOA2       | 0.000002 | -3.396929 |  |
| 21488 | Primary Neoplasm | C7          | 0        | -3.336013 |  |
| 21489 | Primary Neoplasm | SLC7A2      | 0.000037 | -3.332803 |  |
| 21490 | Primary Neoplasm | PPY         | 0        | -3.292544 |  |
| 21491 | Primary Neoplasm | XLKD1       | 0        | -3.279393 |  |
| 21492 | Primary Neoplasm | FAM14A      | 0        | -3.217157 |  |
| 21493 | Primary Neoplasm | FPRL1       | 0.000011 | -3.169335 |  |
| 21494 | Primary Neoplasm | CYP3A4      | 0.000003 | -3.150967 |  |
| 21495 | Primary Neoplasm | EME2        | 0        | -3.130618 |  |
| 21496 | Primary Neoplasm | HES5        | 0        | -3.094644 |  |
| 21497 | Primary Neoplasm | HMGCS2      | 0.000001 | -3.080903 |  |
| 21498 | Primary Neoplasm | EPS15       | 0.000149 | -3.080798 |  |

|       |                  |           |          |           |  |
|-------|------------------|-----------|----------|-----------|--|
| 21499 | Primary Neoplasm | MGC33486  | 0        | -3.061939 |  |
| 21500 | Primary Neoplasm | PBLD      | 0.000273 | -3.038754 |  |
| 21501 | Primary Neoplasm | CYP2C8    | 0.000023 | -2.984006 |  |
| 21502 | Primary Neoplasm | OCSF      | 0        | -2.979459 |  |
| 21503 | Primary Neoplasm | PAH       | 0.000012 | -2.971188 |  |
| 21504 | Primary Neoplasm | DEFB1     | 0.000061 | -2.97051  |  |
| 21505 | Primary Neoplasm | MOBP      | 0        | -2.910332 |  |
| 21506 | Primary Neoplasm | UGT1A8    | 0        | -2.880971 |  |
| 21507 | Primary Neoplasm | FMO3      | 0.000103 | -2.866698 |  |
| 21508 | Primary Neoplasm | CDKN2B    | 0.000179 | -2.863855 |  |
| 21509 | Primary Neoplasm | MT1G      | 0.000021 | -2.861547 |  |
| 21510 | Primary Neoplasm | ZNF608    | 0        | -2.844654 |  |
| 21511 | Primary Neoplasm | EPS8      | 0        | -2.799162 |  |
| 21512 | Primary Neoplasm | KIAA0564  | 0        | -2.784731 |  |
| 21513 | Primary Neoplasm | LOC440838 | 0.000153 | -2.754453 |  |
| 21514 | Primary Neoplasm | CLYBL     | 0.00019  | -2.733223 |  |
| 21515 | Primary Neoplasm | HIGD2A    | 0.000015 | -2.723354 |  |
| 21516 | Primary Neoplasm | SCNN1B    | 0        | -2.70524  |  |
| 21517 | Primary Neoplasm | AGXT      | 0        | -2.700679 |  |
| 21518 | Primary Neoplasm | METTL7A   | 0        | -2.682637 |  |
| 21519 | Primary Neoplasm | MAOB      | 0        | -2.680449 |  |
| 21520 | Primary Neoplasm | SLC6A3    | 0        | -2.645483 |  |
| 21521 | Primary Neoplasm | TMEM1     | 0        | -2.531473 |  |
| 21522 | Primary Neoplasm | FLJ10945  | 0        | -2.529667 |  |
| 21523 | Primary Neoplasm | ADH6      | 0        | -2.494864 |  |
| 21524 | Primary Neoplasm | SERPINA6  | 0.000004 | -2.474711 |  |
| 21525 | Primary Neoplasm | KLKB1     | 0.000008 | -2.428999 |  |
| 21526 | Primary Neoplasm | ANXA11    | 0.000009 | -2.425022 |  |
| 21527 | Primary Neoplasm | PXMP2     | 0        | -2.420483 |  |
| 21528 | Primary Neoplasm | TGM4      | 0.000001 | -2.393012 |  |
| 21529 | Primary Neoplasm | SERPINA3  | 0.000286 | -2.383856 |  |
| 21530 | Primary Neoplasm | C6orf111  | 0        | -2.38063  |  |
| 21531 | Primary Neoplasm | KRTHA5    | 0        | -2.365889 |  |
| 21532 | Primary Neoplasm | NR3C2     | 0        | -2.356602 |  |
| 21533 | Primary Neoplasm | ABCA6     | 0        | -2.307646 |  |
| 21534 | Primary Neoplasm | ETFA      | 0        | -2.241444 |  |
| 21535 | Primary Neoplasm | C1orf115  | 0        | -2.236629 |  |
| 21536 | Primary Neoplasm | MGC11134  | 0        | -2.218774 |  |
| 21537 | Primary Neoplasm | EIF2B1    | 0        | -2.173763 |  |
| 21538 | Primary Neoplasm | ANPEP     | 0.000387 | -2.16877  |  |
| 21539 | Primary Neoplasm | CASQ2     | 0.000094 | -2.147198 |  |
| 21540 | Primary Neoplasm | CDH19     | 0.000056 | -2.136546 |  |
| 21541 | Primary Neoplasm | ADD1      | 0.000146 | -2.122039 |  |
| 21542 | Primary Neoplasm | GPX3      | 0        | -2.082077 |  |
| 21543 | Primary Neoplasm | GDPD2     | 0.000372 | -2.052014 |  |
| 21544 | Primary Neoplasm | CYP2W1    | 0        | -2.046129 |  |
| 21545 | Primary Neoplasm | LOC653483 | 0.00001  | -2.006975 |  |
| 21546 | Primary Neoplasm | TSPAN7    | 0        | -2.004631 |  |
| 21547 | Primary Neoplasm | PRR16     | 0        | 2.000888  |  |
| 21548 | Primary Neoplasm | CDT1      | 0.000228 | 2.001072  |  |

|       |                  |           |          |          |  |
|-------|------------------|-----------|----------|----------|--|
| 21549 | Primary Neoplasm | COL5A1    | 0        | 2.00545  |  |
| 21550 | Primary Neoplasm | ANTXR1    | 0        | 2.033572 |  |
| 21551 | Primary Neoplasm | LOXL2     | 0        | 2.033579 |  |
| 21552 | Primary Neoplasm | SPOCK1    | 0        | 2.049475 |  |
| 21553 | Primary Neoplasm | DPH2      | 0.000054 | 2.059234 |  |
| 21554 | Primary Neoplasm | FUNDC1    | 0        | 2.065707 |  |
| 21555 | Primary Neoplasm | TEX10     | 0.000091 | 2.089342 |  |
| 21556 | Primary Neoplasm | PLAU      | 0        | 2.089529 |  |
| 21557 | Primary Neoplasm | THY1      | 0        | 2.09267  |  |
| 21558 | Primary Neoplasm | SND1      | 0        | 2.118394 |  |
| 21559 | Primary Neoplasm | COL3A1    | 0        | 2.121972 |  |
| 21560 | Primary Neoplasm | MTHFD1    | 0.000106 | 2.122304 |  |
| 21561 | Primary Neoplasm | COL7A1    | 0        | 2.12324  |  |
| 21562 | Primary Neoplasm | MDS025    | 0        | 2.134613 |  |
| 21563 | Primary Neoplasm | EGFL6     | 0.000026 | 2.144819 |  |
| 21564 | Primary Neoplasm | MXRA5     | 0        | 2.148615 |  |
| 21565 | Primary Neoplasm | IFITM1    | 0.000001 | 2.159871 |  |
| 21566 | Primary Neoplasm | CKAP5     | 0.000231 | 2.168001 |  |
| 21567 | Primary Neoplasm | HSA272196 | 0        | 2.188173 |  |
| 21568 | Primary Neoplasm | AURKA     | 0.000122 | 2.211307 |  |
| 21569 | Primary Neoplasm | MAD2L1    | 0        | 2.225257 |  |
| 21570 | Primary Neoplasm | TRIM21    | 0.000005 | 2.260939 |  |
| 21571 | Primary Neoplasm | CEACAM5   | 0.000104 | 2.273474 |  |
| 21572 | Primary Neoplasm | RBBP5     | 0.000265 | 2.277786 |  |
| 21573 | Primary Neoplasm | IGHMBP2   | 0        | 2.281069 |  |
| 21574 | Primary Neoplasm | ADAM12    | 0        | 2.314582 |  |
| 21575 | Primary Neoplasm | DIO2      | 0        | 2.327507 |  |
| 21576 | Primary Neoplasm | RACGAP1   | 0.000285 | 2.352492 |  |
| 21577 | Primary Neoplasm | CDH11     | 0        | 2.363087 |  |
| 21578 | Primary Neoplasm | WNT5A     | 0        | 2.363404 |  |
| 21579 | Primary Neoplasm | COL5A2    | 0        | 2.3652   |  |
| 21580 | Primary Neoplasm | LOC285636 | 0.00022  | 2.367596 |  |
| 21581 | Primary Neoplasm | MMP14     | 0        | 2.369605 |  |
| 21582 | Primary Neoplasm | GART      | 0.000004 | 2.378751 |  |
| 21583 | Primary Neoplasm | MGC3234   | 0        | 2.394413 |  |
| 21584 | Primary Neoplasm | ADCK2     | 0        | 2.402143 |  |
| 21585 | Primary Neoplasm | BARX1     | 0.000009 | 2.406034 |  |
| 21586 | Primary Neoplasm | LOC729680 | 0.00039  | 2.414852 |  |
| 21587 | Primary Neoplasm | IL8       | 0        | 2.433447 |  |
| 21588 | Primary Neoplasm | TWIST1    | 0        | 2.436027 |  |
| 21589 | Primary Neoplasm | CCL11     | 0.000018 | 2.447059 |  |
| 21590 | Primary Neoplasm | TMEM158   | 0        | 2.496317 |  |
| 21591 | Primary Neoplasm | COL1A1    | 0        | 2.505787 |  |
| 21592 | Primary Neoplasm | GRB10     | 0        | 2.553492 |  |
| 21593 | Primary Neoplasm | COL2A1    | 0        | 2.555688 |  |
| 21594 | Primary Neoplasm | TRUB1     | 0.000049 | 2.560965 |  |
| 21595 | Primary Neoplasm | C20orf4   | 0        | 2.618354 |  |
| 21596 | Primary Neoplasm | CALU      | 0        | 2.663052 |  |
| 21597 | Primary Neoplasm | C3orf31   | 0.000179 | 2.665299 |  |
| 21598 | Primary Neoplasm | PHF16     | 0        | 2.742254 |  |

|       |                  |          |          |            |  |
|-------|------------------|----------|----------|------------|--|
| 21599 | Primary Neoplasm | LACTB2   | 0        | 2.797572   |  |
| 21600 | Primary Neoplasm | MFAP2    | 0        | 2.834898   |  |
| 21601 | Primary Neoplasm | FAP      | 0        | 2.874475   |  |
| 21602 | Primary Neoplasm | CTPS     | 0.000415 | 3.06325    |  |
| 21603 | Primary Neoplasm | CDCA8    | 0        | 3.191028   |  |
| 21604 | Primary Neoplasm | GREM1    | 0        | 3.195002   |  |
| 21605 | Primary Neoplasm | CCL20    | 0.000014 | 3.200013   |  |
| 21606 | Primary Neoplasm | IFIT2    | 0        | 3.267003   |  |
| 21607 | Primary Neoplasm | MMP11    | 0        | 3.315333   |  |
| 21608 | Primary Neoplasm | RFT1     | 0        | 3.327087   |  |
| 21609 | Primary Neoplasm | DDA3     | 0        | 3.390333   |  |
| 21610 | Primary Neoplasm | MMP3     | 0        | 3.411777   |  |
| 21611 | Primary Neoplasm | CXCL1    | 0        | 3.435957   |  |
| 21612 | Primary Neoplasm | PLOD3    | 0        | 3.655106   |  |
| 21613 | Primary Neoplasm | pp9099   | 0        | 3.70692    |  |
| 21614 | Primary Neoplasm | CXCL3    | 0        | 3.726125   |  |
| 21615 | Primary Neoplasm | COL10A1  | 0        | 3.736957   |  |
| 21616 | Primary Neoplasm | PSAT1    | 0.000019 | 3.737574   |  |
| 21617 | Primary Neoplasm | TM4SF9   | 0        | 3.737685   |  |
| 21618 | Primary Neoplasm | C20orf20 | 0        | 4.054074   |  |
| 21619 | Primary Neoplasm | C5orf22  | 0.000215 | 4.134619   |  |
| 21620 | Primary Neoplasm | BM039    | 0        | 4.454331   |  |
| 21621 | Primary Neoplasm | CDC25B   | 0        | 4.542251   |  |
| 21622 | Primary Neoplasm | INPP5D   | 0        | 4.562732   |  |
| 21623 | Primary Neoplasm | IFITM3   | 0        | 4.62915    |  |
| 21624 | Primary Neoplasm | PI3      | 0        | 4.702185   |  |
| 21625 | Primary Neoplasm | SHMT2    | 0        | 4.839783   |  |
| 21626 | Primary Neoplasm | MRPL39   | 0.000257 | 5.00501    |  |
| 21627 | Primary Neoplasm | VGf      | 0        | 5.557272   |  |
| 21628 | Primary Neoplasm | T1A-2    | 0        | 6.643422   |  |
| 21629 | Primary Neoplasm | LSM11    | 0        | 6.665394   |  |
| 21630 | Primary Neoplasm | DUSP4    | 0        | 7.233757   |  |
| 21631 | Primary Neoplasm | DUSP14   | 0        | 7.807937   |  |
| 21632 | Primary Neoplasm | ANXA9    | 0        | 7.815307   |  |
| 21633 | Primary Neoplasm | AZGP1    | 0        | 9.954115   |  |
| 21634 | Primary Neoplasm | C17orf39 | 0        | 10.213209  |  |
| 21635 | Primary Neoplasm | VNN1     | 0        | 10.364018  |  |
| 21636 | Primary Neoplasm | ESM1     | 0        | 14.29859   |  |
| 21637 | Primary Neoplasm | CTHRC1   | 0        | 19.152669  |  |
| 21638 | Primary Neoplasm | NAT12    | 0.000307 | 32.336224  |  |
| 21639 | Primary Neoplasm | SPP1     | 0        | 41.897472  |  |
| 21640 | Primary Neoplasm | DPEP1    | 0        | 45.452708  |  |
| 21641 | Primary Neoplasm | MMP7     | 0        | 128.551767 |  |
| 21642 | Primary Neoplasm | NUDT5    | 0.000037 | 376.844444 |  |
| 21643 | Prior Therapy    | CLCA4    | 0        | -9.827755  |  |
| 21644 | Prior Therapy    | CEACAM7  | 0        | -7.684138  |  |
| 21645 | Prior Therapy    | MS4A12   | 0        | -6.295387  |  |
| 21646 | Prior Therapy    | ZG16     | 0        | -6.238001  |  |
| 21647 | Prior Therapy    | AQP8     | 0.000003 | -5.147994  |  |
| 21648 | Prior Therapy    | SLC26A3  | 0        | -4.508956  |  |

|       |                    |           |          |            |  |
|-------|--------------------|-----------|----------|------------|--|
| 21649 | Prior Therapy      | CA4       | 0        | -4.347833  |  |
| 21650 | Prior Therapy      | GUCA2A    | 0        | -3.472724  |  |
| 21651 | Prior Therapy      | DUOX2     | 0        | -3.28592   |  |
| 21652 | Prior Therapy      | LOC646627 | 0        | -3.122643  |  |
| 21653 | Prior Therapy      | GUCA2B    | 0.000007 | -3.075463  |  |
| 21654 | Prior Therapy      | PI3       | 0        | -2.996499  |  |
| 21655 | Prior Therapy      | DHRS9     | 0        | -2.738318  |  |
| 21656 | Prior Therapy      | PLAC8     | 0        | -2.731363  |  |
| 21657 | Prior Therapy      | CA2       | 0.000001 | -2.619544  |  |
| 21658 | Prior Therapy      | CAPN9     | 0        | -2.61569   |  |
| 21659 | Prior Therapy      | HSD11B2   | 0        | -2.405776  |  |
| 21660 | Prior Therapy      | DUOXA2    | 0.000005 | -2.396862  |  |
| 21661 | Prior Therapy      | GPR120    | 0.000014 | -2.389006  |  |
| 21662 | Prior Therapy      | FAM3D     | 0        | -2.335327  |  |
| 21663 | Prior Therapy      | C10orf99  | 0        | -2.323356  |  |
| 21664 | Prior Therapy      | FAM55A    | 0        | -2.290131  |  |
| 21665 | Prior Therapy      | SELENBP1  | 0        | -2.263722  |  |
| 21666 | Prior Therapy      | KRT20     | 0        | -2.25864   |  |
| 21667 | Prior Therapy      | POF1B     | 0        | -2.250425  |  |
| 21668 | Prior Therapy      | C6orf105  | 0        | -2.248023  |  |
| 21669 | Prior Therapy      | LRRC19    | 0        | -2.234078  |  |
| 21670 | Prior Therapy      | C15orf48  | 0        | -2.223382  |  |
| 21671 | Prior Therapy      | TSPAN1    | 0.000004 | -2.204885  |  |
| 21672 | Prior Therapy      | BEST2     | 0        | -2.17273   |  |
| 21673 | Prior Therapy      | SLC26A2   | 0.000009 | -2.153292  |  |
| 21674 | Prior Therapy      | GPA33     | 0        | -2.150576  |  |
| 21675 | Prior Therapy      | FUT6      | 0        | -2.144658  |  |
| 21676 | Prior Therapy      | HHLA2     | 0        | -2.107685  |  |
| 21677 | Prior Therapy      | AXIN2     | 0        | -2.10624   |  |
| 21678 | Prior Therapy      | GCNT3     | 0.000012 | -2.071163  |  |
| 21679 | Prior Therapy      | CCL20     | 0.000003 | -2.067934  |  |
| 21680 | Prior Therapy      | ITM2C     | 0        | -2.064866  |  |
| 21681 | Prior Therapy      | TRPA1     | 0.000013 | -2.050908  |  |
| 21682 | Prior Therapy      | NOX1      | 0.000005 | -2.042676  |  |
| 21683 | Prior Therapy      | PKP2      | 0        | -2.036926  |  |
| 21684 | Prior Therapy      | NOS2      | 0        | -2.033758  |  |
| 21685 | Prior Therapy      | TMEM54    | 0        | -2.029737  |  |
| 21686 | Prior Therapy      | ACE2      | 0.000004 | -2.026441  |  |
| 21687 | Prior Therapy      | PADI2     | 0.000002 | -2.021056  |  |
| 21688 | Prior Therapy      | UGT8      | 0        | -2.01583   |  |
| 21689 | Prior Therapy      | FXYD3     | 0        | -2.004031  |  |
| 21690 | Prior Therapy      | EDN3      | 0        | -2.002887  |  |
| 21691 | Prostate carcinoma | SMCY      | 0.040675 | 6.353116   |  |
| 21692 | Prostate carcinoma | RPS4Y2    | 0.039175 | 13.187671  |  |
| 21693 | Prostate carcinoma | RPS4Y1    | 0.039175 | 56.699911  |  |
| 21694 | Protein p53        | PHLDB2    | 0        | -79.357183 |  |
| 21695 | Protein p53        | PROM1     | 0.000007 | -68.495897 |  |
| 21696 | Protein p53        | TP53      | 0.000023 | -47.096593 |  |
| 21697 | Protein p53        | GDF15     | 0.00041  | -42.95538  |  |
| 21698 | Protein p53        | NRIP1     | 0.000057 | -38.869276 |  |

|       |             |           |          |            |  |
|-------|-------------|-----------|----------|------------|--|
| 21699 | Protein p53 | SCARA3    | 0.000003 | -25.93522  |  |
| 21700 | Protein p53 | MSI1      | 0.000005 | -24.721362 |  |
| 21701 | Protein p53 | FAM171B   | 0.000008 | -22.644665 |  |
| 21702 | Protein p53 | RAB38     | 0        | -21.45702  |  |
| 21703 | Protein p53 | S100A4    | 0        | -20.156038 |  |
| 21704 | Protein p53 | RBPM5     | 0.000266 | -16.968109 |  |
| 21705 | Protein p53 | RGS2      | 0.000003 | -16.540364 |  |
| 21706 | Protein p53 | EML1      | 0        | -16.504361 |  |
| 21707 | Protein p53 | MKX       | 0.000031 | -16.252809 |  |
| 21708 | Protein p53 | KISS1R    | 0.000054 | -16.026044 |  |
| 21709 | Protein p53 | CYBRD1    | 0.000011 | -15.955871 |  |
| 21710 | Protein p53 | MARCKS    | 0.000001 | -15.877995 |  |
| 21711 | Protein p53 | SMARCD3   | 0        | -15.594032 |  |
| 21712 | Protein p53 | HLTF      | 0.000029 | -13.771127 |  |
| 21713 | Protein p53 | SLC16A14  | 0.000003 | -13.373653 |  |
| 21714 | Protein p53 | FBXO44    | 0.000015 | -12.898193 |  |
| 21715 | Protein p53 | MCOLN3    | 0.000004 | -12.019836 |  |
| 21716 | Protein p53 | DSE       | 0.000021 | -11.580355 |  |
| 21717 | Protein p53 | RNF217    | 0.000002 | -11.55933  |  |
| 21718 | Protein p53 | ADAP2     | 0        | -11.396105 |  |
| 21719 | Protein p53 | ZNF618    | 0.000012 | -11.312275 |  |
| 21720 | Protein p53 | PTPN13    | 0.000013 | -11.195711 |  |
| 21721 | Protein p53 | GPX8      | 0.000005 | -10.645534 |  |
| 21722 | Protein p53 | CCNDBP1   | 0.000226 | -10.62795  |  |
| 21723 | Protein p53 | KLK7      | 0        | -10.412573 |  |
| 21724 | Protein p53 | FAM7A3    | 0.000024 | -10.252432 |  |
| 21725 | Protein p53 | MARK1     | 0        | -10.217503 |  |
| 21726 | Protein p53 | TLE2      | 0        | -8.702231  |  |
| 21727 | Protein p53 | TTC7B     | 0.000076 | -8.657179  |  |
| 21728 | Protein p53 | LOC440302 | 0.000016 | -8.285117  |  |
| 21729 | Protein p53 | LOC648795 | 0.000003 | -8.118847  |  |
| 21730 | Protein p53 | PKIG      | 0.000094 | -8.099702  |  |
| 21731 | Protein p53 | TTLL7     | 0.000022 | -7.996952  |  |
| 21732 | Protein p53 | FLJ33996  | 0.000136 | -7.914756  |  |
| 21733 | Protein p53 | B3GALNT1  | 0.000024 | -7.89949   |  |
| 21734 | Protein p53 | GPR98     | 0.000043 | -7.791575  |  |
| 21735 | Protein p53 | RECK      | 0        | -7.333833  |  |
| 21736 | Protein p53 | LOC51233  | 0        | -7.282324  |  |
| 21737 | Protein p53 | ANXA6     | 0.000111 | -7.199033  |  |
| 21738 | Protein p53 | CHRFAM7A  | 0.000021 | -6.761782  |  |
| 21739 | Protein p53 | PRKAR2B   | 0.000163 | -6.727933  |  |
| 21740 | Protein p53 | FAM111A   | 0.00023  | -6.605117  |  |
| 21741 | Protein p53 | KIAA1920  | 0.000002 | -6.572179  |  |
| 21742 | Protein p53 | PSMG1     | 0.000091 | -6.486989  |  |
| 21743 | Protein p53 | TMOD2     | 0.000008 | -6.46977   |  |
| 21744 | Protein p53 | RASSF8    | 0.000153 | -6.447505  |  |
| 21745 | Protein p53 | DIP2C     | 0        | -6.344517  |  |
| 21746 | Protein p53 | SCN8A     | 0.000041 | -6.225373  |  |
| 21747 | Protein p53 | PTPRU     | 0.000007 | -6.177564  |  |
| 21748 | Protein p53 | UTRN      | 0.000091 | -6.151177  |  |

|       |             |          |          |           |  |
|-------|-------------|----------|----------|-----------|--|
| 21749 | Protein p53 | MID2     | 0.000003 | -6.122492 |  |
| 21750 | Protein p53 | COL11A2  | 0.000016 | -6.081678 |  |
| 21751 | Protein p53 | CFL2     | 0        | -6.04272  |  |
| 21752 | Protein p53 | FAM7A1   | 0.000016 | -5.890325 |  |
| 21753 | Protein p53 | LRRC8C   | 0.000016 | -5.817699 |  |
| 21754 | Protein p53 | PARD6G   | 0.000031 | -5.80562  |  |
| 21755 | Protein p53 | POLN     | 0.000006 | -5.62979  |  |
| 21756 | Protein p53 | C8orf47  | 0.000064 | -5.581816 |  |
| 21757 | Protein p53 | ENC1     | 0.000105 | -5.491418 |  |
| 21758 | Protein p53 | DDB2     | 0.002509 | -5.489356 |  |
| 21759 | Protein p53 | DENND2C  | 0.000007 | -5.481683 |  |
| 21760 | Protein p53 | C6orf204 | 0.00008  | -5.372437 |  |
| 21761 | Protein p53 | SLC16A9  | 0.000163 | -5.333557 |  |
| 21762 | Protein p53 | BBS5     | 0.000036 | -5.299647 |  |
| 21763 | Protein p53 | CCDC46   | 0.00003  | -5.297978 |  |
| 21764 | Protein p53 | FLJ43276 | 0.000069 | -5.270924 |  |
| 21765 | Protein p53 | KCNIP2   | 0.000285 | -5.252706 |  |
| 21766 | Protein p53 | SCHIP1   | 0.000259 | -5.146005 |  |
| 21767 | Protein p53 | STARD9   | 0.000098 | -4.914114 |  |
| 21768 | Protein p53 | SERPINB9 | 0.000001 | -4.911115 |  |
| 21769 | Protein p53 | SLC36A4  | 0.000253 | -4.881939 |  |
| 21770 | Protein p53 | CDGAP    | 0.000124 | -4.857344 |  |
| 21771 | Protein p53 | KLHL5    | 0.000051 | -4.830654 |  |
| 21772 | Protein p53 | DRAM     | 0.000021 | -4.800351 |  |
| 21773 | Protein p53 | HNRNPH3  | 0.000111 | -4.787262 |  |
| 21774 | Protein p53 | TTC18    | 0.000014 | -4.779103 |  |
| 21775 | Protein p53 | DBP      | 0.000005 | -4.750197 |  |
| 21776 | Protein p53 | SIX4     | 0.000044 | -4.74543  |  |
| 21777 | Protein p53 | DRAM1    | 0.000091 | -4.728488 |  |
| 21778 | Protein p53 | NUAK1    | 0        | -4.697471 |  |
| 21779 | Protein p53 | SPIRE1   | 0.000098 | -4.683553 |  |
| 21780 | Protein p53 | GPR161   | 0.000053 | -4.663312 |  |
| 21781 | Protein p53 | CTNNB1   | 0.000071 | -4.646194 |  |
| 21782 | Protein p53 | EMID1    | 0.000209 | -4.622975 |  |
| 21783 | Protein p53 | ZNF204   | 0.000048 | -4.619756 |  |
| 21784 | Protein p53 | MRC2     | 0        | -4.548474 |  |
| 21785 | Protein p53 | SNX10    | 0.000152 | -4.466907 |  |
| 21786 | Protein p53 | MPP2     | 0.000017 | -4.450212 |  |
| 21787 | Protein p53 | AMZ2     | 0.000023 | -4.439814 |  |
| 21788 | Protein p53 | ADRBK2   | 0.000104 | -4.356837 |  |
| 21789 | Protein p53 | RBM24    | 0.000022 | -4.322164 |  |
| 21790 | Protein p53 | MOSC2    | 0.000098 | -4.225067 |  |
| 21791 | Protein p53 | N4BP2L2  | 0.000028 | -4.190006 |  |
| 21792 | Protein p53 | PAQR7    | 0.000274 | -4.164603 |  |
| 21793 | Protein p53 | STOX2    | 0.000011 | -4.16124  |  |
| 21794 | Protein p53 | TCF7L1   | 0.000005 | -4.135303 |  |
| 21795 | Protein p53 | RASGRP1  | 0.000036 | -4.104226 |  |
| 21796 | Protein p53 | NHEDC2   | 0.000076 | -4.100033 |  |
| 21797 | Protein p53 | BEND7    | 0.000105 | -4.084679 |  |
| 21798 | Protein p53 | HRK      | 0.000005 | -4.082063 |  |

|       |             |             |          |           |  |
|-------|-------------|-------------|----------|-----------|--|
| 21799 | Protein p53 | IQCJ-SCHIP1 | 0.000032 | -4.075156 |  |
| 21800 | Protein p53 | CYR61       | 0.00002  | -4.046511 |  |
| 21801 | Protein p53 | MXRA7       | 0.000187 | -3.993349 |  |
| 21802 | Protein p53 | MICB        | 0.000177 | -3.966082 |  |
| 21803 | Protein p53 | GLI2        | 0.000058 | -3.945516 |  |
| 21804 | Protein p53 | RNF125      | 0.000073 | -3.89468  |  |
| 21805 | Protein p53 | KLC3        | 0.00014  | -3.88916  |  |
| 21806 | Protein p53 | NMT2        | 0.000124 | -3.841508 |  |
| 21807 | Protein p53 | CCDC136     | 0.000043 | -3.823805 |  |
| 21808 | Protein p53 | B3GNT4      | 0.000147 | -3.817794 |  |
| 21809 | Protein p53 | PPP2R3A     | 0.000143 | -3.81687  |  |
| 21810 | Protein p53 | ZNF280B     | 0.000144 | -3.80754  |  |
| 21811 | Protein p53 | TSPAN4      | 0.000089 | -3.774971 |  |
| 21812 | Protein p53 | MT1E        | 0.000058 | -3.774363 |  |
| 21813 | Protein p53 | RAB6B       | 0.000009 | -3.773154 |  |
| 21814 | Protein p53 | HECTD2      | 0.000301 | -3.764647 |  |
| 21815 | Protein p53 | HMG5        | 0.000806 | -3.741627 |  |
| 21816 | Protein p53 | LOC286440   | 0.000021 | -3.725239 |  |
| 21817 | Protein p53 | LOC201229   | 0.000041 | -3.693565 |  |
| 21818 | Protein p53 | WBP5        | 0.000287 | -3.688804 |  |
| 21819 | Protein p53 | MYBL1       | 0.000015 | -3.678576 |  |
| 21820 | Protein p53 | SLC1A3      | 0.000007 | -3.673599 |  |
| 21821 | Protein p53 | ARAF        | 0.000007 | -3.671667 |  |
| 21822 | Protein p53 | EXOG        | 0.000269 | -3.658182 |  |
| 21823 | Protein p53 | GMPR        | 0.000117 | -3.634325 |  |
| 21824 | Protein p53 | FLJ40113    | 0.000202 | -3.623957 |  |
| 21825 | Protein p53 | VWDE        | 0.000006 | -3.608694 |  |
| 21826 | Protein p53 | GCC2        | 0.004317 | -3.580079 |  |
| 21827 | Protein p53 | ACTA2       | 0.000025 | -3.569658 |  |
| 21828 | Protein p53 | KATNAL1     | 0        | -3.558586 |  |
| 21829 | Protein p53 | NCRNA00173  | 0.000111 | -3.527212 |  |
| 21830 | Protein p53 | BTN2A3      | 0.000207 | -3.524927 |  |
| 21831 | Protein p53 | SHANK3      | 0.000095 | -3.507346 |  |
| 21832 | Protein p53 | TBCEL       | 0.000057 | -3.487617 |  |
| 21833 | Protein p53 | CLTCL1      | 0.000153 | -3.469274 |  |
| 21834 | Protein p53 | CBX6        | 0.000218 | -3.446218 |  |
| 21835 | Protein p53 | ANO8        | 0.000039 | -3.444012 |  |
| 21836 | Protein p53 | GNB3        | 0.000037 | -3.409344 |  |
| 21837 | Protein p53 | CTTN        | 0.000929 | -3.407844 |  |
| 21838 | Protein p53 | PKD1        | 0.000026 | -3.407801 |  |
| 21839 | Protein p53 | HMSD        | 0.000144 | -3.407395 |  |
| 21840 | Protein p53 | TIMP2       | 0.000175 | -3.386567 |  |
| 21841 | Protein p53 | C21orf63    | 0.000093 | -3.38271  |  |
| 21842 | Protein p53 | CTTNBP2     | 0.000056 | -3.361674 |  |
| 21843 | Protein p53 | NKIRAS1     | 0.000187 | -3.347774 |  |
| 21844 | Protein p53 | MDM4        | 0.00027  | -3.347505 |  |
| 21845 | Protein p53 | LOC375190   | 0.000135 | -3.342036 |  |
| 21846 | Protein p53 | DPYSL3      | 0.000626 | -3.325823 |  |
| 21847 | Protein p53 | RHOF        | 0.000046 | -3.323627 |  |
| 21848 | Protein p53 | KIAA1797    | 0.000023 | -3.287566 |  |



|       |             |              |          |           |  |
|-------|-------------|--------------|----------|-----------|--|
| 21849 | Protein p53 | C3orf35      | 0.000084 | -3.24477  |  |
| 21850 | Protein p53 | TPBG         | 0.000069 | -3.240437 |  |
| 21851 | Protein p53 | RAB36        | 0.00001  | -3.238865 |  |
| 21852 | Protein p53 | CA11         | 0.000016 | -3.221219 |  |
| 21853 | Protein p53 | PBX1         | 0.000126 | -3.218884 |  |
| 21854 | Protein p53 | CR2          | 0.000124 | -3.206954 |  |
| 21855 | Protein p53 | C2orf27      | 0.000148 | -3.202568 |  |
| 21856 | Protein p53 | CDH3         | 0.000159 | -3.193304 |  |
| 21857 | Protein p53 | PARD3        | 0.000219 | -3.173436 |  |
| 21858 | Protein p53 | FRAS1        | 0.000002 | -3.150037 |  |
| 21859 | Protein p53 | SRGAP1       | 0.000261 | -3.134377 |  |
| 21860 | Protein p53 | CDRT4        | 0.000142 | -3.126199 |  |
| 21861 | Protein p53 | TCEAL4       | 0.000082 | -3.120772 |  |
| 21862 | Protein p53 | USP45        | 0.000223 | -3.118887 |  |
| 21863 | Protein p53 | MAP3K3       | 0.000158 | -3.117407 |  |
| 21864 | Protein p53 | SIM2         | 0.000077 | -3.115892 |  |
| 21865 | Protein p53 | ELAVL1       | 0.000008 | -3.112688 |  |
| 21866 | Protein p53 | KIAA1586     | 0.000186 | -3.096102 |  |
| 21867 | Protein p53 | RAPGEF2      | 0.000289 | -3.095119 |  |
| 21868 | Protein p53 | C14orf4      | 0.000018 | -3.089096 |  |
| 21869 | Protein p53 | SLC30A4      | 0.00002  | -3.072022 |  |
| 21870 | Protein p53 | GCA          | 0.000636 | -3.054701 |  |
| 21871 | Protein p53 | CAMK1        | 0.000151 | -3.043395 |  |
| 21872 | Protein p53 | LOC728047    | 0.000131 | -3.034422 |  |
| 21873 | Protein p53 | BCYRN1       | 0.000048 | -3.029967 |  |
| 21874 | Protein p53 | HYLS1        | 0.000139 | -3.023997 |  |
| 21875 | Protein p53 | ADORA1       | 0.000019 | -3.012767 |  |
| 21876 | Protein p53 | CNNM2        | 0.000001 | -3.007572 |  |
| 21877 | Protein p53 | HLA-E        | 0.000244 | -3.000298 |  |
| 21878 | Protein p53 | SCG5         | 0.00013  | -2.997883 |  |
| 21879 | Protein p53 | SEMA4F       | 0.000162 | -2.992848 |  |
| 21880 | Protein p53 | AGPAT4       | 0.000168 | -2.989244 |  |
| 21881 | Protein p53 | NPHP1        | 0.000147 | -2.986739 |  |
| 21882 | Protein p53 | ZNF37A       | 0.000218 | -2.970766 |  |
| 21883 | Protein p53 | SNX26        | 0.000022 | -2.967364 |  |
| 21884 | Protein p53 | CNTNAP1      | 0.000028 | -2.966271 |  |
| 21885 | Protein p53 | ATP2A1       | 0.000012 | -2.963659 |  |
| 21886 | Protein p53 | SYTL1        | 0.000103 | -2.96032  |  |
| 21887 | Protein p53 | LOC54492     | 0.000069 | -2.953109 |  |
| 21888 | Protein p53 | SFRS1        | 0.000059 | -2.952906 |  |
| 21889 | Protein p53 | LOC100132153 | 0.000003 | -2.945493 |  |
| 21890 | Protein p53 | STAT4        | 0.000066 | -2.930509 |  |
| 21891 | Protein p53 | TNFAIP8L1    | 0.000026 | -2.906807 |  |
| 21892 | Protein p53 | RUNDC3B      | 0.000047 | -2.884113 |  |
| 21893 | Protein p53 | GTF2H2       | 0.000295 | -2.882074 |  |
| 21894 | Protein p53 | ZNF25        | 0.000031 | -2.880115 |  |
| 21895 | Protein p53 | ANKRD18A     | 0.000249 | -2.876288 |  |
| 21896 | Protein p53 | 3-Sep        | 0.000009 | -2.871437 |  |
| 21897 | Protein p53 | JAZF1        | 0.000058 | -2.866248 |  |
| 21898 | Protein p53 | TANC2        | 0.00003  | -2.848808 |  |

|       |             |           |          |           |  |
|-------|-------------|-----------|----------|-----------|--|
| 21899 | Protein p53 | EPOR      | 0.000069 | -2.845683 |  |
| 21900 | Protein p53 | CYP2U1    | 0.000128 | -2.843941 |  |
| 21901 | Protein p53 | GCAT      | 0.00009  | -2.839744 |  |
| 21902 | Protein p53 | HEMK1     | 0.000041 | -2.837929 |  |
| 21903 | Protein p53 | SFI1      | 0.000028 | -2.810339 |  |
| 21904 | Protein p53 | MFGE8     | 0.000003 | -2.808922 |  |
| 21905 | Protein p53 | ADAM32    | 0.000228 | -2.80424  |  |
| 21906 | Protein p53 | PEG10     | 0.003647 | -2.800432 |  |
| 21907 | Protein p53 | PSMD3     | 0.000273 | -2.784817 |  |
| 21908 | Protein p53 | DZIP1L    | 0.000008 | -2.745394 |  |
| 21909 | Protein p53 | PMAIP1    | 0.000012 | -2.735515 |  |
| 21910 | Protein p53 | HDAC2     | 0.000007 | -2.728819 |  |
| 21911 | Protein p53 | ASAM      | 0.000154 | -2.72168  |  |
| 21912 | Protein p53 | ITPRIPL2  | 0.000075 | -2.686906 |  |
| 21913 | Protein p53 | TARSL2    | 0.000001 | -2.682116 |  |
| 21914 | Protein p53 | RDX       | 0.000073 | -2.67983  |  |
| 21915 | Protein p53 | MEGF6     | 0.000094 | -2.674067 |  |
| 21916 | Protein p53 | HYMAI     | 0.000108 | -2.667008 |  |
| 21917 | Protein p53 | PKN3      | 0.000087 | -2.66276  |  |
| 21918 | Protein p53 | HS6ST1    | 0.000022 | -2.650736 |  |
| 21919 | Protein p53 | LOC652005 | 0.000018 | -2.648741 |  |
| 21920 | Protein p53 | EIF3F     | 0.000039 | -2.645408 |  |
| 21921 | Protein p53 | FBXL2     | 0.000111 | -2.645171 |  |
| 21922 | Protein p53 | NEK1      | 0.000095 | -2.644595 |  |
| 21923 | Protein p53 | ZNF57     | 0.000004 | -2.63682  |  |
| 21924 | Protein p53 | C21orf7   | 0.000003 | -2.636255 |  |
| 21925 | Protein p53 | C2orf76   | 0.000161 | -2.632252 |  |
| 21926 | Protein p53 | BCORL1    | 0.000185 | -2.618549 |  |
| 21927 | Protein p53 | TIFA      | 0.000069 | -2.606932 |  |
| 21928 | Protein p53 | CROP      | 0.000254 | -2.584791 |  |
| 21929 | Protein p53 | TNRC6C    | 0.000008 | -2.56454  |  |
| 21930 | Protein p53 | SEC61A2   | 0.000002 | -2.557307 |  |
| 21931 | Protein p53 | TRIM37    | 0.000077 | -2.557137 |  |
| 21932 | Protein p53 | CYFIP2    | 0.001529 | -2.548694 |  |
| 21933 | Protein p53 | SGSH      | 0.000136 | -2.547538 |  |
| 21934 | Protein p53 | THRAP3    | 0.000016 | -2.547111 |  |
| 21935 | Protein p53 | RAD51C    | 0.000073 | -2.545745 |  |
| 21936 | Protein p53 | GLT8D1    | 0.001959 | -2.545454 |  |
| 21937 | Protein p53 | WDR7      | 0.00009  | -2.543718 |  |
| 21938 | Protein p53 | SSX2IP    | 0.000237 | -2.543506 |  |
| 21939 | Protein p53 | CHST3     | 0.000017 | -2.541441 |  |
| 21940 | Protein p53 | ELAC1     | 0.000083 | -2.535801 |  |
| 21941 | Protein p53 | PSIP1     | 0.000032 | -2.535774 |  |
| 21942 | Protein p53 | TGFB1I1   | 0.000292 | -2.521098 |  |
| 21943 | Protein p53 | LOC728377 | 0.000002 | -2.515295 |  |
| 21944 | Protein p53 | ANKRD36B  | 0.000012 | -2.511553 |  |
| 21945 | Protein p53 | RBM4      | 0.000055 | -2.508263 |  |
| 21946 | Protein p53 | FAM164A   | 0.000078 | -2.506848 |  |
| 21947 | Protein p53 | TPST1     | 0.000145 | -2.506486 |  |
| 21948 | Protein p53 | GPAM      | 0.000217 | -2.502145 |  |

|       |             |              |          |           |  |
|-------|-------------|--------------|----------|-----------|--|
| 21949 | Protein p53 | NTN5         | 0.000014 | -2.500072 |  |
| 21950 | Protein p53 | FAT1         | 0.000041 | -2.49786  |  |
| 21951 | Protein p53 | LYPLAL1      | 0.000019 | -2.496133 |  |
| 21952 | Protein p53 | SULT1A1      | 0.000278 | -2.494731 |  |
| 21953 | Protein p53 | DDHD1        | 0.000015 | -2.488128 |  |
| 21954 | Protein p53 | TOP3A        | 0.000235 | -2.487689 |  |
| 21955 | Protein p53 | PLA2G6       | 0.000078 | -2.483683 |  |
| 21956 | Protein p53 | DCLK2        | 0.000008 | -2.466714 |  |
| 21957 | Protein p53 | F8           | 0.000054 | -2.460219 |  |
| 21958 | Protein p53 | DOCK7        | 0.00001  | -2.459611 |  |
| 21959 | Protein p53 | IFT74        | 0.000199 | -2.45617  |  |
| 21960 | Protein p53 | NOTCH2NL     | 0.000099 | -2.448863 |  |
| 21961 | Protein p53 | PIK3C3       | 0.000067 | -2.444206 |  |
| 21962 | Protein p53 | NOLC1        | 0.000003 | -2.443868 |  |
| 21963 | Protein p53 | OSBP2        | 0.000125 | -2.441452 |  |
| 21964 | Protein p53 | SEC31B       | 0.000003 | -2.428658 |  |
| 21965 | Protein p53 | TOMM34       | 0.003004 | -2.426347 |  |
| 21966 | Protein p53 | NFAT5        | 0.000137 | -2.425518 |  |
| 21967 | Protein p53 | LOC100507448 | 0.000008 | -2.423487 |  |
| 21968 | Protein p53 | C18orf54     | 0.00015  | -2.422807 |  |
| 21969 | Protein p53 | SYNCRIP      | 0        | -2.42249  |  |
| 21970 | Protein p53 | CELSR2       | 0.000148 | -2.416698 |  |
| 21971 | Protein p53 | C9orf61      | 0.000154 | -2.385151 |  |
| 21972 | Protein p53 | C6orf170     | 0.000175 | -2.382184 |  |
| 21973 | Protein p53 | EIF4EBP1     | 0.003167 | -2.37925  |  |
| 21974 | Protein p53 | MAMLD1       | 0.000008 | -2.377772 |  |
| 21975 | Protein p53 | KCTD6        | 0.000059 | -2.376819 |  |
| 21976 | Protein p53 | CNOT7        | 0.000104 | -2.367895 |  |
| 21977 | Protein p53 | DHX30        | 0.000125 | -2.366956 |  |
| 21978 | Protein p53 | FUT10        | 0.000028 | -2.364717 |  |
| 21979 | Protein p53 | BNIP3L       | 0.000002 | -2.359025 |  |
| 21980 | Protein p53 | UNC119       | 0.000046 | -2.348208 |  |
| 21981 | Protein p53 | KSR2         | 0.000041 | -2.345834 |  |
| 21982 | Protein p53 | INPP5E       | 0.000001 | -2.344917 |  |
| 21983 | Protein p53 | HSPB1        | 0.000012 | -2.343433 |  |
| 21984 | Protein p53 | ERI1         | 0.000211 | -2.342181 |  |
| 21985 | Protein p53 | TRAF3        | 0.000028 | -2.339781 |  |
| 21986 | Protein p53 | BTRC         | 0.000218 | -2.339372 |  |
| 21987 | Protein p53 | SRP72        | 0.000178 | -2.338873 |  |
| 21988 | Protein p53 | ZSCAN20      | 0.000184 | -2.334139 |  |
| 21989 | Protein p53 | GOLGA9P      | 0.000092 | -2.322996 |  |
| 21990 | Protein p53 | MED13L       | 0.000012 | -2.322913 |  |
| 21991 | Protein p53 | ZCCHC11      | 0.000028 | -2.321129 |  |
| 21992 | Protein p53 | FABP6        | 0.001061 | -2.320459 |  |
| 21993 | Protein p53 | TNFSF12      | 0.000061 | -2.313381 |  |
| 21994 | Protein p53 | LRPAP1       | 0.000069 | -2.310307 |  |
| 21995 | Protein p53 | TYMS         | 0.000001 | -2.30578  |  |
| 21996 | Protein p53 | MOSPD1       | 0.000053 | -2.301269 |  |
| 21997 | Protein p53 | CDH24        | 0.000056 | -2.29812  |  |
| 21998 | Protein p53 | SENP6        | 0.000165 | -2.296558 |  |

|       |             |            |          |           |  |
|-------|-------------|------------|----------|-----------|--|
| 21999 | Protein p53 | UCP2       | 0.000188 | -2.293495 |  |
| 22000 | Protein p53 | CSPG5      | 0.000102 | -2.291194 |  |
| 22001 | Protein p53 | ARHGEF37   | 0.000015 | -2.290725 |  |
| 22002 | Protein p53 | RUSC2      | 0.000045 | -2.289799 |  |
| 22003 | Protein p53 | PHTF2      | 0.00017  | -2.288694 |  |
| 22004 | Protein p53 | C10orf137  | 0.000001 | -2.288498 |  |
| 22005 | Protein p53 | SRMS       | 0.000118 | -2.283625 |  |
| 22006 | Protein p53 | RANBP17    | 0.000015 | -2.279878 |  |
| 22007 | Protein p53 | C17orf69   | 0.000223 | -2.279328 |  |
| 22008 | Protein p53 | SHOX2      | 0.00001  | -2.276001 |  |
| 22009 | Protein p53 | NOC3L      | 0.000093 | -2.275555 |  |
| 22010 | Protein p53 | DOCK1      | 0        | -2.267904 |  |
| 22011 | Protein p53 | LYG1       | 0.000174 | -2.267478 |  |
| 22012 | Protein p53 | POLI       | 0.000007 | -2.267001 |  |
| 22013 | Protein p53 | NCRNA00094 | 0.000051 | -2.255855 |  |
| 22014 | Protein p53 | ACVR2B     | 0.000019 | -2.243514 |  |
| 22015 | Protein p53 | PPM1M      | 0.00004  | -2.24155  |  |
| 22016 | Protein p53 | NTAN1      | 0.000203 | -2.23913  |  |
| 22017 | Protein p53 | RAB11FIP2  | 0.000073 | -2.234653 |  |
| 22018 | Protein p53 | EXOC6B     | 0.000059 | -2.233084 |  |
| 22019 | Protein p53 | CITED2     | 0.000053 | -2.232065 |  |
| 22020 | Protein p53 | PNPLA6     | 0.000004 | -2.230106 |  |
| 22021 | Protein p53 | SLC25A39   | 0.000001 | -2.228725 |  |
| 22022 | Protein p53 | GNG10      | 0.000082 | -2.228616 |  |
| 22023 | Protein p53 | MTX3       | 0.000005 | -2.2229   |  |
| 22024 | Protein p53 | SLC25A30   | 0.0001   | -2.221969 |  |
| 22025 | Protein p53 | DDR2       | 0.000228 | -2.217265 |  |
| 22026 | Protein p53 | PBK        | 0.00004  | -2.213962 |  |
| 22027 | Protein p53 | RPS28      | 0.000155 | -2.20962  |  |
| 22028 | Protein p53 | HEATR6     | 0.000171 | -2.205405 |  |
| 22029 | Protein p53 | RNF5       | 0.004317 | -2.204465 |  |
| 22030 | Protein p53 | MON2       | 0.000038 | -2.203917 |  |
| 22031 | Protein p53 | DCLK1      | 0.001007 | -2.202188 |  |
| 22032 | Protein p53 | FECH       | 0.000165 | -2.201653 |  |
| 22033 | Protein p53 | EIF2AK4    | 0.000004 | -2.199079 |  |
| 22034 | Protein p53 | DUS3L      | 0.000158 | -2.196435 |  |
| 22035 | Protein p53 | KCTD12     | 0.00009  | -2.188174 |  |
| 22036 | Protein p53 | NSD1       | 0.00002  | -2.185498 |  |
| 22037 | Protein p53 | HMGB1      | 0.000257 | -2.183219 |  |
| 22038 | Protein p53 | HCG8       | 0.000105 | -2.182757 |  |
| 22039 | Protein p53 | POMT2      | 0.000136 | -2.181866 |  |
| 22040 | Protein p53 | PCNX       | 0.000005 | -2.176842 |  |
| 22041 | Protein p53 | YJEFN3     | 0.000022 | -2.167793 |  |
| 22042 | Protein p53 | HOXB13     | 0.00003  | -2.165502 |  |
| 22043 | Protein p53 | CEPT1      | 0.00011  | -2.164874 |  |
| 22044 | Protein p53 | RTTN       | 0.00001  | -2.154799 |  |
| 22045 | Protein p53 | CTNNAL1    | 0.000186 | -2.152896 |  |
| 22046 | Protein p53 | INVS       | 0.00029  | -2.150785 |  |
| 22047 | Protein p53 | LOC646851  | 0.000099 | -2.150201 |  |
| 22048 | Protein p53 | ZYG11B     | 0.000024 | -2.149045 |  |

|       |             |            |          |           |  |
|-------|-------------|------------|----------|-----------|--|
| 22049 | Protein p53 | KIAA1432   | 0.000002 | -2.144912 |  |
| 22050 | Protein p53 | BTN2A2     | 0.000132 | -2.143085 |  |
| 22051 | Protein p53 | C20orf96   | 0.000107 | -2.141774 |  |
| 22052 | Protein p53 | FAM160B1   | 0.000093 | -2.136974 |  |
| 22053 | Protein p53 | ST6GALNAC6 | 0.000245 | -2.134926 |  |
| 22054 | Protein p53 | CDCA2      | 0.000062 | -2.134742 |  |
| 22055 | Protein p53 | SPTB       | 0.000251 | -2.134205 |  |
| 22056 | Protein p53 | DCTN5      | 0.002608 | -2.127463 |  |
| 22057 | Protein p53 | HDGF2      | 0.000008 | -2.121635 |  |
| 22058 | Protein p53 | BMP8B      | 0.000001 | -2.118034 |  |
| 22059 | Protein p53 | GPC1       | 0.000014 | -2.115008 |  |
| 22060 | Protein p53 | NISCH      | 0.000018 | -2.113714 |  |
| 22061 | Protein p53 | RGS10      | 0.000017 | -2.113307 |  |
| 22062 | Protein p53 | TOP3B      | 0.000022 | -2.113287 |  |
| 22063 | Protein p53 | IMPACT     | 0.000011 | -2.111917 |  |
| 22064 | Protein p53 | PQLC1      | 0.000005 | -2.11065  |  |
| 22065 | Protein p53 | C18orf24   | 0.000007 | -2.107296 |  |
| 22066 | Protein p53 | CP110      | 0.000081 | -2.107218 |  |
| 22067 | Protein p53 | MSTO2P     | 0.000064 | -2.105921 |  |
| 22068 | Protein p53 | KTN1       | 0.000281 | -2.10316  |  |
| 22069 | Protein p53 | ZMYM1      | 0.000171 | -2.098944 |  |
| 22070 | Protein p53 | DGCR8      | 0.000004 | -2.097377 |  |
| 22071 | Protein p53 | PLD6       | 0.000173 | -2.092744 |  |
| 22072 | Protein p53 | INTS2      | 0.000033 | -2.084261 |  |
| 22073 | Protein p53 | FABP5      | 0.00025  | -2.081836 |  |
| 22074 | Protein p53 | LAMB2      | 0.000265 | -2.080383 |  |
| 22075 | Protein p53 | KPNA5      | 0.000021 | -2.080091 |  |
| 22076 | Protein p53 | INSR       | 0.000057 | -2.074774 |  |
| 22077 | Protein p53 | IFI30      | 0.001901 | -2.073481 |  |
| 22078 | Protein p53 | LRP10      | 0.001222 | -2.069649 |  |
| 22079 | Protein p53 | GCN1L1     | 0.000426 | -2.066851 |  |
| 22080 | Protein p53 | MYBBP1A    | 0.000069 | -2.05959  |  |
| 22081 | Protein p53 | PPAP2B     | 0.002708 | -2.057697 |  |
| 22082 | Protein p53 | CUL9       | 0.000024 | -2.055442 |  |
| 22083 | Protein p53 | GEMIN5     | 0.000188 | -2.052325 |  |
| 22084 | Protein p53 | C3orf39    | 0.000289 | -2.04922  |  |
| 22085 | Protein p53 | DENND5A    | 0.000169 | -2.04788  |  |
| 22086 | Protein p53 | CDKL3      | 0.000247 | -2.04579  |  |
| 22087 | Protein p53 | ERCC1      | 0.000587 | -2.044943 |  |
| 22088 | Protein p53 | RAVER2     | 0.000087 | -2.039754 |  |
| 22089 | Protein p53 | METTL10    | 0.000008 | -2.03607  |  |
| 22090 | Protein p53 | KIAA1333   | 0.000072 | -2.030055 |  |
| 22091 | Protein p53 | QRICH2     | 0.000234 | -2.027934 |  |
| 22092 | Protein p53 | AUH        | 0.000004 | -2.02723  |  |
| 22093 | Protein p53 | NOL3       | 0.002096 | -2.024963 |  |
| 22094 | Protein p53 | RPL4       | 0.000192 | -2.02487  |  |
| 22095 | Protein p53 | TRMT1      | 0.000044 | -2.021316 |  |
| 22096 | Protein p53 | ABCF1      | 0.000092 | -2.019239 |  |
| 22097 | Protein p53 | AVL9       | 0.001231 | -2.01783  |  |
| 22098 | Protein p53 | MTHFD1     | 0.001476 | -2.017781 |  |

|       |             |              |          |           |  |
|-------|-------------|--------------|----------|-----------|--|
| 22099 | Protein p53 | GCFC1        | 0.000028 | -2.012418 |  |
| 22100 | Protein p53 | CD44         | 0.003366 | -2.010455 |  |
| 22101 | Protein p53 | 5-Mar        | 0.000021 | -2.009577 |  |
| 22102 | Protein p53 | ADAM22       | 0.000216 | -2.00715  |  |
| 22103 | Protein p53 | NHLRC2       | 0.000173 | -2.005527 |  |
| 22104 | Protein p53 | ZBTB8        | 0.000169 | -2.002427 |  |
| 22105 | Protein p53 | LOC339988    | 0.000008 | 2.000944  |  |
| 22106 | Protein p53 | MFAP2        | 0        | 2.032549  |  |
| 22107 | Protein p53 | GPR56        | 0.000287 | 2.03382   |  |
| 22108 | Protein p53 | YLPM1        | 0.000302 | 2.056725  |  |
| 22109 | Protein p53 | LEPROT       | 0.000244 | 2.056876  |  |
| 22110 | Protein p53 | PRKCDBP      | 0.000636 | 2.06511   |  |
| 22111 | Protein p53 | CALD1        | 0        | 2.066687  |  |
| 22112 | Protein p53 | S100A11      | 0.000071 | 2.068479  |  |
| 22113 | Protein p53 | CCDC64       | 0.000014 | 2.069689  |  |
| 22114 | Protein p53 | BGN          | 0.000202 | 2.072609  |  |
| 22115 | Protein p53 | ADRBK1       | 0.000003 | 2.075921  |  |
| 22116 | Protein p53 | TNKS2        | 0.001371 | 2.077541  |  |
| 22117 | Protein p53 | MCCC1        | 0.000077 | 2.080364  |  |
| 22118 | Protein p53 | MTMR2        | 0.000008 | 2.083627  |  |
| 22119 | Protein p53 | IGHG1        | 0        | 2.086508  |  |
| 22120 | Protein p53 | TPM2         | 0        | 2.094737  |  |
| 22121 | Protein p53 | TMEM164      | 0.000033 | 2.103535  |  |
| 22122 | Protein p53 | FTH1         | 0.000196 | 2.10661   |  |
| 22123 | Protein p53 | PCGF5        | 0.000051 | 2.107123  |  |
| 22124 | Protein p53 | ARFGEF2      | 0.000032 | 2.111078  |  |
| 22125 | Protein p53 | C3orf23      | 0        | 2.119588  |  |
| 22126 | Protein p53 | ACY1         | 0.000024 | 2.124582  |  |
| 22127 | Protein p53 | LRRC8A       | 0.00026  | 2.128568  |  |
| 22128 | Protein p53 | RBCK1        | 0.00012  | 2.130934  |  |
| 22129 | Protein p53 | WDR67        | 0.000066 | 2.131068  |  |
| 22130 | Protein p53 | LOC100132999 | 0.000077 | 2.13246   |  |
| 22131 | Protein p53 | GSTK1        | 0.000047 | 2.134457  |  |
| 22132 | Protein p53 | ECH1         | 0.000232 | 2.136261  |  |
| 22133 | Protein p53 | SRI          | 0.0047   | 2.139194  |  |
| 22134 | Protein p53 | ETV6         | 0.000197 | 2.139379  |  |
| 22135 | Protein p53 | KIF13B       | 0.000002 | 2.140129  |  |
| 22136 | Protein p53 | DLG3         | 0.000157 | 2.144243  |  |
| 22137 | Protein p53 | CCDC82       | 0.000073 | 2.151796  |  |
| 22138 | Protein p53 | MMP11        | 0        | 2.155168  |  |
| 22139 | Protein p53 | HSDL2        | 0.000052 | 2.158646  |  |
| 22140 | Protein p53 | TMEM158      | 0        | 2.168515  |  |
| 22141 | Protein p53 | MCF2L        | 0.000021 | 2.184457  |  |
| 22142 | Protein p53 | LFNG         | 0.000028 | 2.189166  |  |
| 22143 | Protein p53 | CTSK         | 0        | 2.189639  |  |
| 22144 | Protein p53 | ROMO1        | 0.000002 | 2.201651  |  |
| 22145 | Protein p53 | HIST4H4      | 0.000273 | 2.205272  |  |
| 22146 | Protein p53 | SPOCK1       | 0        | 2.207104  |  |
| 22147 | Protein p53 | ZDHHC9       | 0.00026  | 2.215214  |  |
| 22148 | Protein p53 | UBE2D2       | 0.000011 | 2.218704  |  |

|       |             |              |          |          |  |
|-------|-------------|--------------|----------|----------|--|
| 22149 | Protein p53 | RICS         | 0.000012 | 2.22689  |  |
| 22150 | Protein p53 | WNT5A        | 0        | 2.230763 |  |
| 22151 | Protein p53 | TAGLN        | 0        | 2.230853 |  |
| 22152 | Protein p53 | LOC100506922 | 0.000096 | 2.256579 |  |
| 22153 | Protein p53 | COL15A1      | 0        | 2.260351 |  |
| 22154 | Protein p53 | C20orf24     | 0.000011 | 2.267668 |  |
| 22155 | Protein p53 | NEK3         | 0.001873 | 2.270858 |  |
| 22156 | Protein p53 | SFRP4        | 0        | 2.276769 |  |
| 22157 | Protein p53 | C20orf74     | 0.000106 | 2.282048 |  |
| 22158 | Protein p53 | ABHD12       | 0.000046 | 2.296449 |  |
| 22159 | Protein p53 | WNT11        | 0.000135 | 2.301905 |  |
| 22160 | Protein p53 | SEC23B       | 0.000098 | 2.308136 |  |
| 22161 | Protein p53 | SNRPA1       | 0.000007 | 2.308718 |  |
| 22162 | Protein p53 | ODZ3         | 0.002619 | 2.310428 |  |
| 22163 | Protein p53 | SULF1        | 0        | 2.319154 |  |
| 22164 | Protein p53 | MYL9         | 0.000001 | 2.334374 |  |
| 22165 | Protein p53 | PLCH1        | 0.000044 | 2.337335 |  |
| 22166 | Protein p53 | CHMP4B       | 0.000095 | 2.343461 |  |
| 22167 | Protein p53 | GLA          | 0.000029 | 2.353499 |  |
| 22168 | Protein p53 | DACT1        | 0.000557 | 2.364469 |  |
| 22169 | Protein p53 | PRKCA        | 0.000153 | 2.378513 |  |
| 22170 | Protein p53 | ZNF223       | 0.000022 | 2.384845 |  |
| 22171 | Protein p53 | MCTP1        | 0.000112 | 2.393982 |  |
| 22172 | Protein p53 | CTSD         | 0.000039 | 2.401471 |  |
| 22173 | Protein p53 | SIK1         | 0.000055 | 2.407825 |  |
| 22174 | Protein p53 | BAIAP2       | 0.000699 | 2.414017 |  |
| 22175 | Protein p53 | FAM62B       | 0.000001 | 2.414755 |  |
| 22176 | Protein p53 | NUP98        | 0.000004 | 2.419936 |  |
| 22177 | Protein p53 | INPP1        | 0.000097 | 2.422773 |  |
| 22178 | Protein p53 | WNK1         | 0.000584 | 2.426189 |  |
| 22179 | Protein p53 | ECOP         | 0.000166 | 2.441085 |  |
| 22180 | Protein p53 | ARHGEF10L    | 0.000044 | 2.468049 |  |
| 22181 | Protein p53 | MLKL         | 0.000008 | 2.480787 |  |
| 22182 | Protein p53 | COL6A1       | 0        | 2.48556  |  |
| 22183 | Protein p53 | PSME4        | 0.003031 | 2.503896 |  |
| 22184 | Protein p53 | EFNB1        | 0.000003 | 2.511787 |  |
| 22185 | Protein p53 | LAD1         | 0.000172 | 2.563215 |  |
| 22186 | Protein p53 | NARG2        | 0.000031 | 2.593275 |  |
| 22187 | Protein p53 | AGA          | 0.000215 | 2.593541 |  |
| 22188 | Protein p53 | POLD4        | 0.000018 | 2.59396  |  |
| 22189 | Protein p53 | AADACL1      | 0        | 2.662401 |  |
| 22190 | Protein p53 | METTL9       | 0.000027 | 2.673071 |  |
| 22191 | Protein p53 | ADAP1        | 0.0001   | 2.687005 |  |
| 22192 | Protein p53 | DPAGT1       | 0        | 2.696705 |  |
| 22193 | Protein p53 | AQR          | 0.000636 | 2.721913 |  |
| 22194 | Protein p53 | JUN          | 0.000055 | 2.725946 |  |
| 22195 | Protein p53 | RGS14        | 0.000096 | 2.726364 |  |
| 22196 | Protein p53 | SATB1        | 0.000097 | 2.751735 |  |
| 22197 | Protein p53 | MMP3         | 0        | 2.756449 |  |
| 22198 | Protein p53 | ARHGAP42     | 0.000055 | 2.773032 |  |

|       |             |          |          |          |  |
|-------|-------------|----------|----------|----------|--|
| 22199 | Protein p53 | TUBA4A   | 0.000008 | 2.789495 |  |
| 22200 | Protein p53 | COL11A1  | 0        | 2.790647 |  |
| 22201 | Protein p53 | EPS8L3   | 0.000032 | 2.795256 |  |
| 22202 | Protein p53 | ZNF185   | 0.00026  | 2.799903 |  |
| 22203 | Protein p53 | TNC      | 0        | 2.807085 |  |
| 22204 | Protein p53 | FUT4     | 0.000078 | 2.815228 |  |
| 22205 | Protein p53 | TST      | 0.000291 | 2.81638  |  |
| 22206 | Protein p53 | IGF2R    | 0.001778 | 2.825601 |  |
| 22207 | Protein p53 | MMP1     | 0.000001 | 2.832884 |  |
| 22208 | Protein p53 | PTPRB    | 0.000082 | 2.847353 |  |
| 22209 | Protein p53 | FAM108C1 | 0.000281 | 2.89171  |  |
| 22210 | Protein p53 | MYH11    | 0        | 2.897326 |  |
| 22211 | Protein p53 | SEC14L1  | 0.003716 | 2.912447 |  |
| 22212 | Protein p53 | SLC12A7  | 0        | 2.913571 |  |
| 22213 | Protein p53 | ITGA6    | 0.000017 | 2.921719 |  |
| 22214 | Protein p53 | TMEM133  | 0.000081 | 2.945957 |  |
| 22215 | Protein p53 | SLC25A13 | 0.000108 | 2.981576 |  |
| 22216 | Protein p53 | CHPT1    | 0.000001 | 2.983401 |  |
| 22217 | Protein p53 | GAS1     | 0        | 3.007882 |  |
| 22218 | Protein p53 | PTK6     | 0.000071 | 3.034597 |  |
| 22219 | Protein p53 | RPP25    | 0.000177 | 3.049872 |  |
| 22220 | Protein p53 | SLC5A1   | 0.000046 | 3.058335 |  |
| 22221 | Protein p53 | MBD4     | 0.002309 | 3.082864 |  |
| 22222 | Protein p53 | KALRN    | 0.000069 | 3.11255  |  |
| 22223 | Protein p53 | BAIAP2L2 | 0.000084 | 3.122287 |  |
| 22224 | Protein p53 | LAMB3    | 0.000027 | 3.13326  |  |
| 22225 | Protein p53 | TNRC18   | 0.000005 | 3.135812 |  |
| 22226 | Protein p53 | GMDS     | 0.000027 | 3.157851 |  |
| 22227 | Protein p53 | TGFBR2   | 0.000016 | 3.161223 |  |
| 22228 | Protein p53 | AMACR    | 0.000075 | 3.18741  |  |
| 22229 | Protein p53 | COL17A1  | 0.000084 | 3.189146 |  |
| 22230 | Protein p53 | TTC37    | 0.000244 | 3.197723 |  |
| 22231 | Protein p53 | ITGB8    | 0.000932 | 3.228952 |  |
| 22232 | Protein p53 | TMC7     | 0.000037 | 3.231842 |  |
| 22233 | Protein p53 | RABGAP1L | 0        | 3.273762 |  |
| 22234 | Protein p53 | WWC2     | 0.003224 | 3.308669 |  |
| 22235 | Protein p53 | MFAP5    | 0        | 3.321188 |  |
| 22236 | Protein p53 | FERMT1   | 0.000109 | 3.325981 |  |
| 22237 | Protein p53 | ST3GAL4  | 0.000263 | 3.331892 |  |
| 22238 | Protein p53 | GCOM1    | 0.000018 | 3.35798  |  |
| 22239 | Protein p53 | HSPA4    | 0.003679 | 3.426198 |  |
| 22240 | Protein p53 | USH1C    | 0.000014 | 3.47718  |  |
| 22241 | Protein p53 | PLEKHA6  | 0.000206 | 3.528435 |  |
| 22242 | Protein p53 | GREM1    | 0        | 3.545274 |  |
| 22243 | Protein p53 | TIPARP   | 0.002244 | 3.652352 |  |
| 22244 | Protein p53 | TRAK1    | 0.000004 | 3.684815 |  |
| 22245 | Protein p53 | ISG20    | 0.000055 | 3.692702 |  |
| 22246 | Protein p53 | BMP4     | 0.000636 | 3.741762 |  |
| 22247 | Protein p53 | F5       | 0.000272 | 3.810503 |  |
| 22248 | Protein p53 | FBLIM1   | 0.000102 | 3.989457 |  |



|       |             |              |          |           |  |
|-------|-------------|--------------|----------|-----------|--|
| 22249 | Protein p53 | FRK          | 0.00013  | 4.030782  |  |
| 22250 | Protein p53 | C5           | 0.000039 | 4.072259  |  |
| 22251 | Protein p53 | PRSS3        | 0.000095 | 4.109125  |  |
| 22252 | Protein p53 | MIA2         | 0.000019 | 4.20487   |  |
| 22253 | Protein p53 | LMO7         | 0        | 4.488017  |  |
| 22254 | Protein p53 | TIMM17B      | 0.000009 | 4.493556  |  |
| 22255 | Protein p53 | IL20RA       | 0.000092 | 4.620432  |  |
| 22256 | Protein p53 | LOC339290    | 0.000114 | 4.671562  |  |
| 22257 | Protein p53 | DNM1         | 0.000111 | 4.792522  |  |
| 22258 | Protein p53 | PSD4         | 0.000002 | 4.836057  |  |
| 22259 | Protein p53 | ZNF91        | 0.002866 | 4.906171  |  |
| 22260 | Protein p53 | ACTG2        | 0        | 4.912122  |  |
| 22261 | Protein p53 | HPDL         | 0.000181 | 4.976846  |  |
| 22262 | Protein p53 | SLC16A4      | 0.000241 | 5.132544  |  |
| 22263 | Protein p53 | PRSS1        | 0.000066 | 5.37163   |  |
| 22264 | Protein p53 | LAMA3        | 0.000005 | 5.446837  |  |
| 22265 | Protein p53 | CHN2         | 0.000002 | 5.495506  |  |
| 22266 | Protein p53 | SLCO1B3      | 0.000699 | 5.667167  |  |
| 22267 | Protein p53 | LOC100499467 | 0.000019 | 5.858976  |  |
| 22268 | Protein p53 | PRDM1        | 0.000091 | 6.095754  |  |
| 22269 | Protein p53 | NAV3         | 0.000312 | 6.131481  |  |
| 22270 | Protein p53 | SRC          | 0.00013  | 6.169824  |  |
| 22271 | Protein p53 | SLC2A3       | 0.001743 | 6.361693  |  |
| 22272 | Protein p53 | FAM113B      | 0.000018 | 6.458196  |  |
| 22273 | Protein p53 | HIST1H3G     | 0.000001 | 6.649406  |  |
| 22274 | Protein p53 | HNF1A        | 0.000002 | 6.722007  |  |
| 22275 | Protein p53 | UGT1A4       | 0.000277 | 6.898427  |  |
| 22276 | Protein p53 | PRSS2        | 0.000029 | 6.999257  |  |
| 22277 | Protein p53 | SLC2A14      | 0.002026 | 7.058454  |  |
| 22278 | Protein p53 | ACSL5        | 0.00003  | 7.491147  |  |
| 22279 | Protein p53 | CYP3A5       | 0.000271 | 7.717247  |  |
| 22280 | Protein p53 | NEBL         | 0.003043 | 7.778324  |  |
| 22281 | Protein p53 | RIN2         | 0        | 7.78971   |  |
| 22282 | Protein p53 | RIPK3        | 0.000099 | 7.831119  |  |
| 22283 | Protein p53 | CHFR         | 0.000217 | 8.003618  |  |
| 22284 | Protein p53 | EHF          | 0.000119 | 8.010758  |  |
| 22285 | Protein p53 | NSUN7        | 0.000002 | 8.518426  |  |
| 22286 | Protein p53 | TUSC1        | 0.000071 | 8.920776  |  |
| 22287 | Protein p53 | OAS1         | 0.00027  | 9.357664  |  |
| 22288 | Protein p53 | CDK6         | 0        | 9.395292  |  |
| 22289 | Protein p53 | ZNF506       | 0.000005 | 10.048693 |  |
| 22290 | Protein p53 | RNF157       | 0.000085 | 10.802542 |  |
| 22291 | Protein p53 | SLC40A1      | 0.000033 | 10.868366 |  |
| 22292 | Protein p53 | C12orf27     | 0.000002 | 11.136132 |  |
| 22293 | Protein p53 | ARL4C        | 0.000115 | 11.416531 |  |
| 22294 | Protein p53 | NHSL1        | 0.000081 | 12.23337  |  |
| 22295 | Protein p53 | ANKS4B       | 0.000009 | 13.769932 |  |
| 22296 | Protein p53 | SPAG16       | 0.000027 | 14.054657 |  |
| 22297 | Protein p53 | MGLL         | 0.000165 | 14.614457 |  |
| 22298 | Protein p53 | RNF128       | 0.000065 | 14.813946 |  |

|       |             |              |          |            |  |
|-------|-------------|--------------|----------|------------|--|
| 22299 | Protein p53 | TNFSF10      | 0.000031 | 14.820611  |  |
| 22300 | Protein p53 | CD302        | 0.000018 | 17.464301  |  |
| 22301 | Protein p53 | C6orf150     | 0.000175 | 17.5689    |  |
| 22302 | Protein p53 | HSD17B2      | 0.000074 | 21.748633  |  |
| 22303 | Protein p53 | GCNT3        | 0.000067 | 24.623659  |  |
| 22304 | Protein p53 | C4orf18      | 0.000016 | 26.415101  |  |
| 22305 | Protein p53 | SGK2         | 0.000001 | 29.128191  |  |
| 22306 | Protein p53 | LOC100124692 | 0.000008 | 30.496008  |  |
| 22307 | Protein p53 | UGT1A3       | 0.000215 | 31.187261  |  |
| 22308 | Protein p53 | FLJ20184     | 0        | 32.739482  |  |
| 22309 | Protein p53 | ZBED2        | 0.000527 | 34.369777  |  |
| 22310 | Protein p53 | HIST1H2BB    | 0        | 37.778601  |  |
| 22311 | Protein p53 | HIST1H2BI    | 0.000014 | 44.493057  |  |
| 22312 | Protein p53 | GIPC2        | 0.000041 | 47.919546  |  |
| 22313 | Protein p53 | ALDH1A1      | 0.000066 | 49.933504  |  |
| 22314 | Protein p53 | HIST1H3C     | 0.000172 | 51.063572  |  |
| 22315 | Protein p53 | UGT1A1       | 0.000056 | 57.932938  |  |
| 22316 | Protein p53 | TM4SF1       | 0.000002 | 62.391396  |  |
| 22317 | Protein p53 | LGALS4       | 0.000069 | 100.099554 |  |
| 22318 | Protein p53 | LYZ          | 0.000006 | 197.566048 |  |
| 22319 | Radiation   | REG1B        | 0.000008 | -9.377253  |  |
| 22320 | Radiation   | CLCA4        | 0        | -7.004552  |  |
| 22321 | Radiation   | MS4A12       | 0.000013 | -6.113246  |  |
| 22322 | Radiation   | CEACAM7      | 0.000004 | -4.815933  |  |
| 22323 | Radiation   | SI           | 0.000013 | -4.602946  |  |
| 22324 | Radiation   | SLC26A3      | 0.000001 | -4.120587  |  |
| 22325 | Radiation   | ASCL2        | 0.000004 | -4.090253  |  |
| 22326 | Radiation   | KLK10        | 0.000074 | -3.447447  |  |
| 22327 | Radiation   | C10orf99     | 0        | -3.417173  |  |
| 22328 | Radiation   | CA4          | 0.000027 | -3.322223  |  |
| 22329 | Radiation   | PI3          | 0.000053 | -3.20333   |  |
| 22330 | Radiation   | DMBT1        | 0.000005 | -3.158941  |  |
| 22331 | Radiation   | BTNL8        | 0.00003  | -3.143397  |  |
| 22332 | Radiation   | GAD1         | 0        | -3.131845  |  |
| 22333 | Radiation   | GRM8         | 0.000021 | -3.036762  |  |
| 22334 | Radiation   | SEMG1        | 0.000096 | -3.02247   |  |
| 22335 | Radiation   | GPA33        | 0.000133 | -2.970294  |  |
| 22336 | Radiation   | ETV4         | 0        | -2.956175  |  |
| 22337 | Radiation   | HOXA10       | 0.000001 | -2.927409  |  |
| 22338 | Radiation   | PPP1R1B      | 0.000003 | -2.925221  |  |
| 22339 | Radiation   | PLAC8        | 0        | -2.869226  |  |
| 22340 | Radiation   | GCNT3        | 0.000031 | -2.818528  |  |
| 22341 | Radiation   | HSD11B2      | 0.000006 | -2.758098  |  |
| 22342 | Radiation   | ACE2         | 0        | -2.703972  |  |
| 22343 | Radiation   | AFAP1-AS     | 0        | -2.656585  |  |
| 22344 | Radiation   | GAL3ST1      | 0        | -2.642896  |  |
| 22345 | Radiation   | GJB5         | 0        | -2.619622  |  |
| 22346 | Radiation   | SLC26A2      | 0.000004 | -2.572697  |  |
| 22347 | Radiation   | ACSL6        | 0        | -2.558908  |  |
| 22348 | Radiation   | CBLC         | 0.000087 | -2.553178  |  |

|       |           |              |          |           |  |
|-------|-----------|--------------|----------|-----------|--|
| 22349 | Radiation | LRRC19       | 0.000013 | -2.544712 |  |
| 22350 | Radiation | OSTBETA      | 0.000016 | -2.541604 |  |
| 22351 | Radiation | PRR15        | 0        | -2.516785 |  |
| 22352 | Radiation | HR           | 0.000005 | -2.516208 |  |
| 22353 | Radiation | PLA2G10      | 0.000004 | -2.461758 |  |
| 22354 | Radiation | SLC13A2      | 0.000004 | -2.460392 |  |
| 22355 | Radiation | UGT8         | 0.000131 | -2.430706 |  |
| 22356 | Radiation | HHLA2        | 0.000001 | -2.426586 |  |
| 22357 | Radiation | NOX1         | 0.000123 | -2.424593 |  |
| 22358 | Radiation | EPN3         | 0.000101 | -2.407784 |  |
| 22359 | Radiation | PRSS3        | 0.000011 | -2.399846 |  |
| 22360 | Radiation | TRPM6        | 0.000047 | -2.38064  |  |
| 22361 | Radiation | ROBO2        | 0.000131 | -2.373002 |  |
| 22362 | Radiation | CDX1         | 0.000121 | -2.362139 |  |
| 22363 | Radiation | XK           | 0.000009 | -2.360366 |  |
| 22364 | Radiation | PLEKHA6      | 0.000038 | -2.355337 |  |
| 22365 | Radiation | HPDL         | 0.000137 | -2.329338 |  |
| 22366 | Radiation | IHH          | 0.000002 | -2.327418 |  |
| 22367 | Radiation | GPX2         | 0.00004  | -2.31021  |  |
| 22368 | Radiation | CLDN2        | 0.000009 | -2.291243 |  |
| 22369 | Radiation | RAPGEFL1     | 0.000308 | -2.288837 |  |
| 22370 | Radiation | HOXA13       | 0.000002 | -2.285029 |  |
| 22371 | Radiation | ZG16B        | 0.000092 | -2.280213 |  |
| 22372 | Radiation | CKMT1A       | 0.000115 | -2.276833 |  |
| 22373 | Radiation | PKP2         | 0.000008 | -2.26335  |  |
| 22374 | Radiation | ITPKA        | 0.000006 | -2.261717 |  |
| 22375 | Radiation | PRSS1        | 0        | -2.261085 |  |
| 22376 | Radiation | TMEM54       | 0.000032 | -2.249464 |  |
| 22377 | Radiation | CDH17        | 0.00014  | -2.241173 |  |
| 22378 | Radiation | PLEK2        | 0.000022 | -2.237062 |  |
| 22379 | Radiation | CDC45        | 0.000219 | -2.210318 |  |
| 22380 | Radiation | GIPC2        | 0.0001   | -2.203936 |  |
| 22381 | Radiation | NOS2         | 0.000008 | -2.193151 |  |
| 22382 | Radiation | SCIN         | 0        | -2.191931 |  |
| 22383 | Radiation | SELENBP1     | 0.000183 | -2.187424 |  |
| 22384 | Radiation | LOC100505633 | 0.000266 | -2.184313 |  |
| 22385 | Radiation | HOXA5        | 0        | -2.174766 |  |
| 22386 | Radiation | PRSS12       | 0.000066 | -2.167532 |  |
| 22387 | Radiation | SFN          | 0.000168 | -2.167506 |  |
| 22388 | Radiation | GGT6         | 0.00013  | -2.164095 |  |
| 22389 | Radiation | ARHGAP8      | 0.000121 | -2.145479 |  |
| 22390 | Radiation | DSC3         | 0.000105 | -2.13763  |  |
| 22391 | Radiation | LOC400573    | 0.000006 | -2.13572  |  |
| 22392 | Radiation | LRRC31       | 0.000138 | -2.12492  |  |
| 22393 | Radiation | LOC729680    | 0.000005 | -2.124049 |  |
| 22394 | Radiation | PITX1        | 0.000128 | -2.113922 |  |
| 22395 | Radiation | C16orf53     | 0.000145 | -2.110319 |  |
| 22396 | Radiation | PLS1         | 0.000089 | -2.108095 |  |
| 22397 | Radiation | TPX2         | 0.000007 | -2.099725 |  |
| 22398 | Radiation | STYK1        | 0.000053 | -2.099148 |  |

|       |            |          |          |           |  |
|-------|------------|----------|----------|-----------|--|
| 22399 | Radiation  | ADAP1    | 0        | -2.09866  |  |
| 22400 | Radiation  | BCL2L15  | 0.000013 | -2.096901 |  |
| 22401 | Radiation  | ESRP1    | 0.000046 | -2.096632 |  |
| 22402 | Radiation  | ANLN     | 0.000004 | -2.091956 |  |
| 22403 | Radiation  | CEACAM1  | 0.000011 | -2.086042 |  |
| 22404 | Radiation  | YBX2     | 0.000065 | -2.081157 |  |
| 22405 | Radiation  | HKDC1    | 0.000075 | -2.080243 |  |
| 22406 | Radiation  | CDCA3    | 0.000001 | -2.079912 |  |
| 22407 | Radiation  | BCL2L14  | 0.000213 | -2.078232 |  |
| 22408 | Radiation  | NCAPH    | 0.000073 | -2.072185 |  |
| 22409 | Radiation  | ARHGAP32 | 0.000001 | -2.070218 |  |
| 22410 | Radiation  | C15orf48 | 0.000112 | -2.06679  |  |
| 22411 | Radiation  | FXYD3    | 0        | -2.064529 |  |
| 22412 | Radiation  | PLK1     | 0.000002 | -2.064204 |  |
| 22413 | Radiation  | TTC22    | 0.000212 | -2.060377 |  |
| 22414 | Radiation  | GRHL2    | 0.00002  | -2.05978  |  |
| 22415 | Radiation  | KLF5     | 0.000151 | -2.049687 |  |
| 22416 | Radiation  | TRIM2    | 0.000011 | -2.045956 |  |
| 22417 | Radiation  | SATB2    | 0.000201 | -2.042722 |  |
| 22418 | Radiation  | LAD1     | 0.000023 | -2.040375 |  |
| 22419 | Radiation  | C1orf106 | 0.000021 | -2.038333 |  |
| 22420 | Radiation  | MYO1A    | 0.000026 | -2.032036 |  |
| 22421 | Radiation  | KBTBD11  | 0.00003  | -2.031752 |  |
| 22422 | Radiation  | PRSS8    | 0.000014 | -2.015174 |  |
| 22423 | Radiation  | CDCA7    | 0.000114 | -2.01385  |  |
| 22424 | Radiation  | KIAA1244 | 0.000241 | -2.011288 |  |
| 22425 | Radiation  | FERMT1   | 0.000065 | -2.002065 |  |
| 22426 | Radiation  | NRARP    | 0.000219 | -2.001723 |  |
| 22427 | Recurrence | MFAP2    | 0        | 2.032549  |  |
| 22428 | Recurrence | CALD1    | 0        | 2.066687  |  |
| 22429 | Recurrence | IGHG1    | 0        | 2.086508  |  |
| 22430 | Recurrence | TPM2     | 0        | 2.094737  |  |
| 22431 | Recurrence | MMP11    | 0        | 2.155168  |  |
| 22432 | Recurrence | TMEM158  | 0        | 2.168515  |  |
| 22433 | Recurrence | CTSK     | 0        | 2.189639  |  |
| 22434 | Recurrence | SPOCK1   | 0        | 2.207104  |  |
| 22435 | Recurrence | WNT5A    | 0        | 2.230763  |  |
| 22436 | Recurrence | TAGLN    | 0        | 2.230853  |  |
| 22437 | Recurrence | COL15A1  | 0        | 2.260351  |  |
| 22438 | Recurrence | SFRP4    | 0        | 2.276769  |  |
| 22439 | Recurrence | SULF1    | 0        | 2.319154  |  |
| 22440 | Recurrence | MYL9     | 0.000001 | 2.334374  |  |
| 22441 | Recurrence | COL6A1   | 0        | 2.48556   |  |
| 22442 | Recurrence | MMP3     | 0        | 2.756449  |  |
| 22443 | Recurrence | COL11A1  | 0        | 2.790647  |  |
| 22444 | Recurrence | TNC      | 0        | 2.807085  |  |
| 22445 | Recurrence | MMP1     | 0.000001 | 2.832884  |  |
| 22446 | Recurrence | MYH11    | 0        | 2.897326  |  |
| 22447 | Recurrence | GAS1     | 0        | 3.007882  |  |
| 22448 | Recurrence | MFAP5    | 0        | 3.321188  |  |

|       |            |            |          |           |  |
|-------|------------|------------|----------|-----------|--|
| 22449 | Recurrence | GREM1      | 0        | 3.545274  |  |
| 22450 | Recurrence | ACTG2      | 0        | 4.912122  |  |
| 22451 | Red stools | KRT7       | 0.014466 | -3.354952 |  |
| 22452 | Red stools | TNNT1      | 0.015899 | -3.260496 |  |
| 22453 | Red stools | KLHL14     | 0.026774 | -2.208134 |  |
| 22454 | Red stools | TFAP2A     | 0.013004 | -2.126966 |  |
| 22455 | Red stools | PRAC       | 0.005446 | 2.523307  |  |
| 22456 | Redness    | KRT7       | 0.014466 | -3.354952 |  |
| 22457 | Redness    | TNNT1      | 0.015899 | -3.260496 |  |
| 22458 | Redness    | KLHL14     | 0.026774 | -2.208134 |  |
| 22459 | Redness    | TFAP2A     | 0.013004 | -2.126966 |  |
| 22460 | Redness    | PRAC       | 0.005446 | 2.523307  |  |
| 22461 | Relapse    | CLCA4      | 0        | -6.997335 |  |
| 22462 | Relapse    | PLIN1      | 0.003838 | -6.51506  |  |
| 22463 | Relapse    | ADIPOQ     | 0.000471 | -5.700469 |  |
| 22464 | Relapse    | FABP4      | 0.000098 | -5.506863 |  |
| 22465 | Relapse    | ITLN1      | 0.000035 | -5.058006 |  |
| 22466 | Relapse    | RETNLB     | 0.000023 | -5.014788 |  |
| 22467 | Relapse    | REG3A      | 0.001014 | -4.68324  |  |
| 22468 | Relapse    | CLCA1      | 0.000005 | -4.662234 |  |
| 22469 | Relapse    | AQP8       | 0.000232 | -4.08574  |  |
| 22470 | Relapse    | CEACAM7    | 0.000005 | -3.86524  |  |
| 22471 | Relapse    | CA4        | 0        | -3.800329 |  |
| 22472 | Relapse    | SPINK4     | 0.004038 | -3.650813 |  |
| 22473 | Relapse    | FCGBP      | 0.000157 | -3.520092 |  |
| 22474 | Relapse    | NKX2-3     | 0        | -3.498712 |  |
| 22475 | Relapse    | DUOX2      | 0        | -3.434831 |  |
| 22476 | Relapse    | SLC26A3    | 0.000039 | -3.303359 |  |
| 22477 | Relapse    | TNMD       | 0.004579 | -3.194664 |  |
| 22478 | Relapse    | SCARA5     | 0        | -3.148793 |  |
| 22479 | Relapse    | IGJ        | 0.000001 | -3.109702 |  |
| 22480 | Relapse    | LOC646627  | 0.000025 | -3.033957 |  |
| 22481 | Relapse    | PI3        | 0.000162 | -2.915444 |  |
| 22482 | Relapse    | GUCA2A     | 0.001833 | -2.744463 |  |
| 22483 | Relapse    | DUOXA2     | 0        | -2.730663 |  |
| 22484 | Relapse    | IGHM       | 0.000149 | -2.710103 |  |
| 22485 | Relapse    | GUCA2B     | 0.000875 | -2.672136 |  |
| 22486 | Relapse    | ST6GALNAC1 | 0.00122  | -2.632715 |  |
| 22487 | Relapse    | LPL        | 0.002952 | -2.541677 |  |
| 22488 | Relapse    | MAB21L2    | 0.000051 | -2.535263 |  |
| 22489 | Relapse    | DHRS9      | 0.000047 | -2.512144 |  |
| 22490 | Relapse    | TRPA1      | 0.000003 | -2.497909 |  |
| 22491 | Relapse    | PLAC8      | 0.000129 | -2.465376 |  |
| 22492 | Relapse    | L1TD1      | 0.000019 | -2.455642 |  |
| 22493 | Relapse    | S100B      | 0.004234 | -2.381022 |  |
| 22494 | Relapse    | VIP        | 0.002087 | -2.360163 |  |
| 22495 | Relapse    | GPR120     | 0.002042 | -2.351596 |  |
| 22496 | Relapse    | C6orf105   | 0.000007 | -2.274063 |  |
| 22497 | Relapse    | TIMP4      | 0.000026 | -2.267333 |  |
| 22498 | Relapse    | CAPN9      | 0.001351 | -2.26588  |  |

|       |         |              |          |           |  |
|-------|---------|--------------|----------|-----------|--|
| 22499 | Relapse | FAM3D        | 0.000022 | -2.241042 |  |
| 22500 | Relapse | CLC          | 0.000007 | -2.176222 |  |
| 22501 | Relapse | BTNL8        | 0.000939 | -2.157317 |  |
| 22502 | Relapse | SELENBP1     | 0.000003 | -2.15416  |  |
| 22503 | Relapse | TNFRSF17     | 0.000958 | -2.153672 |  |
| 22504 | Relapse | NOS2         | 0        | -2.136165 |  |
| 22505 | Relapse | CCL20        | 0.000022 | -2.133764 |  |
| 22506 | Relapse | TSPAN11      | 0.000001 | -2.129942 |  |
| 22507 | Relapse | FAM5C        | 0.004156 | -2.090436 |  |
| 22508 | Relapse | LOC100507804 | 0.000414 | -2.082244 |  |
| 22509 | Relapse | TPSAB1       | 0.00003  | -2.077828 |  |
| 22510 | Relapse | TPSG1        | 0.003084 | -2.076429 |  |
| 22511 | Relapse | FAM55A       | 0.004579 | -2.023956 |  |
| 22512 | Relapse | PCDH18       | 0.000135 | -2.009583 |  |
| 22513 | Relapse | GMDS         | 0        | -2.004959 |  |
| 22514 | Relapse | ATP2A3       | 0.001074 | -2.004061 |  |
| 22515 | Relapse | C10orf99     | 0.000499 | -2.003806 |  |
| 22516 | Relapse | JARID1A      | 0        | 2.127838  |  |
| 22517 | Relapse | CILP         | 0.000001 | 2.143193  |  |
| 22518 | Relapse | C1S          | 0        | 2.287361  |  |
| 22519 | Relapse | SPP1         | 0.000445 | 2.478418  |  |
| 22520 | Relapse | MYEOV2       | 0        | 2.715434  |  |
| 22521 | Relapse | BCL9         | 0.000004 | 2.826559  |  |
| 22522 | Relapse | EYA1         | 0        | 2.863305  |  |
| 22523 | Relapse | SMARCE1      | 0        | 3.040492  |  |
| 22524 | Relapse | LOC284058    | 0        | 4.007837  |  |
| 22525 | Relapse | NNAT         | 0        | 4.850585  |  |
| 22526 | Relapse | CRABP2       | 0        | 5.164568  |  |
| 22527 | Relapse | MMP11        | 0        | 6.757327  |  |
| 22528 | Relapse | COL9A2       | 0        | 7.314118  |  |
| 22529 | Relapse | PRKX         | 0        | 7.847356  |  |
| 22530 | Relapse | COL2A1       | 0        | 15.420948 |  |
| 22531 | RNA     | COL1A1       | 0        | -5.27529  |  |
| 22532 | RNA     | MMP7         | 0        | -4.132738 |  |
| 22533 | RNA     | SPP1         | 0        | -4.130239 |  |
| 22534 | RNA     | IL8          | 0        | -3.187774 |  |
| 22535 | RNA     | KRT23        | 0        | -3.15084  |  |
| 22536 | RNA     | COL1A2       | 0        | -3.116379 |  |
| 22537 | RNA     | TGFB1        | 0        | -2.936139 |  |
| 22538 | RNA     | INHBA        | 0        | -2.666466 |  |
| 22539 | RNA     | HKDC1        | 0        | -2.660582 |  |
| 22540 | RNA     | NFE2L3       | 0        | -2.463859 |  |
| 22541 | RNA     | CCL20        | 0        | -2.310437 |  |
| 22542 | RNA     | SFRP4        | 0        | -2.294594 |  |
| 22543 | RNA     | MMP12        | 0        | -2.283803 |  |
| 22544 | RNA     | COL10A1      | 0        | -2.176511 |  |
| 22545 | RNA     | MYC          | 0        | -2.131113 |  |
| 22546 | RNA     | JUB          | 0        | -2.121437 |  |
| 22547 | RNA     | GZMB         | 0        | -2.088884 |  |
| 22548 | RNA     | CDC123       | 0        | 2.016474  |  |

|       |                        |           |          |           |  |
|-------|------------------------|-----------|----------|-----------|--|
| 22549 | RNA                    | C6orf118  | 0        | 2.143404  |  |
| 22550 | RNA                    | CD1A      | 0        | 2.195462  |  |
| 22551 | RNA                    | NUDCD1    | 0        | 2.265265  |  |
| 22552 | RNA                    | ENPEP     | 0        | 2.363024  |  |
| 22553 | RNA, Small Interfering | HIST1H1B  | 0        | -2.64695  |  |
| 22554 | RNA, Small Interfering | HIST2H2AC | 0        | -2.415358 |  |
| 22555 | RNA, Small Interfering | CASP8AP2  | 0        | -2.371293 |  |
| 22556 | RNA, Small Interfering | FCGBP     | 0.000001 | 2.00844   |  |
| 22557 | RNA, Small Interfering | NUPR1     | 0.000001 | 2.016364  |  |
| 22558 | RNA, Small Interfering | PLAC1     | 0        | 2.020517  |  |
| 22559 | RNA, Small Interfering | FOSB      | 0.000001 | 2.032871  |  |
| 22560 | RNA, Small Interfering | MMP9      | 0.000002 | 2.041901  |  |
| 22561 | RNA, Small Interfering | ANTXR2    | 0.000001 | 2.053014  |  |
| 22562 | RNA, Small Interfering | CYP24A1   | 0        | 2.057296  |  |
| 22563 | RNA, Small Interfering | CA13      | 0.000001 | 2.081924  |  |
| 22564 | RNA, Small Interfering | LOC644774 | 0.028042 | 2.109325  |  |
| 22565 | RNA, Small Interfering | CITED2    | 0.024419 | 2.111216  |  |
| 22566 | RNA, Small Interfering | ULBP2     | 0        | 2.114992  |  |
| 22567 | RNA, Small Interfering | SLC16A6   | 0        | 2.118581  |  |
| 22568 | RNA, Small Interfering | B3GNT3    | 0        | 2.131492  |  |
| 22569 | RNA, Small Interfering | HIC1      | 0        | 2.133742  |  |
| 22570 | RNA, Small Interfering | IL23A     | 0.000001 | 2.153786  |  |
| 22571 | RNA, Small Interfering | LY6K      | 0.000001 | 2.204235  |  |
| 22572 | RNA, Small Interfering | IRF7      | 0.000001 | 2.207127  |  |
| 22573 | RNA, Small Interfering | KRT34     | 0        | 2.211508  |  |
| 22574 | RNA, Small Interfering | SNAIL     | 0        | 2.212177  |  |
| 22575 | RNA, Small Interfering | TBX2      | 0        | 2.270576  |  |
| 22576 | RNA, Small Interfering | SMPD3     | 0        | 2.28961   |  |
| 22577 | RNA, Small Interfering | AREG      | 0        | 2.300718  |  |
| 22578 | RNA, Small Interfering | EEF1A2    | 0        | 2.317045  |  |
| 22579 | RNA, Small Interfering | CFTR      | 0.000001 | 2.32035   |  |
| 22580 | RNA, Small Interfering | FAM83D    | 0.030884 | 2.323368  |  |
| 22581 | RNA, Small Interfering | SERPINB2  | 0.000001 | 2.330261  |  |
| 22582 | RNA, Small Interfering | LOC646626 | 0.000001 | 2.34748   |  |
| 22583 | RNA, Small Interfering | DIRAS1    | 0.000002 | 2.374302  |  |
| 22584 | RNA, Small Interfering | SRPK3     | 0.000001 | 2.390633  |  |
| 22585 | RNA, Small Interfering | TMEM173   | 0.000001 | 2.426391  |  |
| 22586 | RNA, Small Interfering | JMJD1A    | 0.028597 | 2.426486  |  |
| 22587 | RNA, Small Interfering | EPPK1     | 0        | 2.435479  |  |
| 22588 | RNA, Small Interfering | ADRB2     | 0        | 2.456163  |  |
| 22589 | RNA, Small Interfering | ZC3H7B    | 0.000001 | 2.506225  |  |
| 22590 | RNA, Small Interfering | IL11      | 0.000001 | 2.52461   |  |
| 22591 | RNA, Small Interfering | EREG      | 0.000002 | 2.526433  |  |
| 22592 | RNA, Small Interfering | ADM       | 0.033883 | 2.53193   |  |
| 22593 | RNA, Small Interfering | CKM       | 0.000001 | 2.533892  |  |
| 22594 | RNA, Small Interfering | C3orf32   | 0        | 2.595676  |  |
| 22595 | RNA, Small Interfering | SGK1      | 0        | 2.605669  |  |
| 22596 | RNA, Small Interfering | OVOL1     | 0.000001 | 2.626017  |  |
| 22597 | RNA, Small Interfering | HIST1H2BB | 0        | 2.673884  |  |
| 22598 | RNA, Small Interfering | ANGPT2    | 0        | 2.677362  |  |

|       |                        |            |          |          |  |
|-------|------------------------|------------|----------|----------|--|
| 22599 | RNA, Small Interfering | PFKFB3     | 0.031328 | 2.682371 |  |
| 22600 | RNA, Small Interfering | CX3CL1     | 0.000001 | 2.688947 |  |
| 22601 | RNA, Small Interfering | BNIP3L     | 0.030536 | 2.760907 |  |
| 22602 | RNA, Small Interfering | COMP       | 0.000001 | 2.781728 |  |
| 22603 | RNA, Small Interfering | SPOCK2     | 0.000001 | 2.834058 |  |
| 22604 | RNA, Small Interfering | LYPD5      | 0        | 2.848822 |  |
| 22605 | RNA, Small Interfering | IL3RA      | 0.000002 | 2.944213 |  |
| 22606 | RNA, Small Interfering | WSB1       | 0.027134 | 2.964485 |  |
| 22607 | RNA, Small Interfering | HIST1H2BC  | 0        | 2.989315 |  |
| 22608 | RNA, Small Interfering | DEFA3      | 0        | 3.007719 |  |
| 22609 | RNA, Small Interfering | CH25H      | 0        | 3.023039 |  |
| 22610 | RNA, Small Interfering | TKTL1      | 0.000001 | 3.062219 |  |
| 22611 | RNA, Small Interfering | HIST1H2BK  | 0        | 3.07581  |  |
| 22612 | RNA, Small Interfering | ARC        | 0        | 3.076423 |  |
| 22613 | RNA, Small Interfering | PFKFB4     | 0.028784 | 3.087503 |  |
| 22614 | RNA, Small Interfering | SLPI       | 0        | 3.096307 |  |
| 22615 | RNA, Small Interfering | CSF1R      | 0        | 3.106477 |  |
| 22616 | RNA, Small Interfering | LGALS7B    | 0        | 3.128339 |  |
| 22617 | RNA, Small Interfering | MC5R       | 0.000001 | 3.129998 |  |
| 22618 | RNA, Small Interfering | HIST1H3D   | 0        | 3.158737 |  |
| 22619 | RNA, Small Interfering | HIST1H2BN  | 0        | 3.181743 |  |
| 22620 | RNA, Small Interfering | HIST1H2BH  | 0        | 3.199799 |  |
| 22621 | RNA, Small Interfering | HIST1H2BM  | 0        | 3.201212 |  |
| 22622 | RNA, Small Interfering | HIST2H2BE  | 0        | 3.22091  |  |
| 22623 | RNA, Small Interfering | IL32       | 0.000002 | 3.238301 |  |
| 22624 | RNA, Small Interfering | ATP10A     | 0        | 3.267799 |  |
| 22625 | RNA, Small Interfering | HIST1H2BO  | 0        | 3.298525 |  |
| 22626 | RNA, Small Interfering | BNIP3      | 0.018093 | 3.31517  |  |
| 22627 | RNA, Small Interfering | HIST1H2BE  | 0        | 3.324678 |  |
| 22628 | RNA, Small Interfering | GAST       | 0        | 3.327484 |  |
| 22629 | RNA, Small Interfering | HIST1H2BL  | 0        | 3.328004 |  |
| 22630 | RNA, Small Interfering | HIST1H2BF  | 0        | 3.352824 |  |
| 22631 | RNA, Small Interfering | SPON2      | 0.000002 | 3.355216 |  |
| 22632 | RNA, Small Interfering | LGALS7     | 0        | 3.359796 |  |
| 22633 | RNA, Small Interfering | FGFR3      | 0        | 3.375565 |  |
| 22634 | RNA, Small Interfering | HIST1H2BJ  | 0        | 3.427326 |  |
| 22635 | RNA, Small Interfering | HIST1H2BI  | 0        | 3.497828 |  |
| 22636 | RNA, Small Interfering | HIST1H2AC  | 0        | 3.504752 |  |
| 22637 | RNA, Small Interfering | HIST3H2BB  | 0        | 3.505771 |  |
| 22638 | RNA, Small Interfering | AQP3       | 0        | 3.547453 |  |
| 22639 | RNA, Small Interfering | HIST1H2BG  | 0        | 3.588124 |  |
| 22640 | RNA, Small Interfering | HIST1H2AG  | 0        | 3.588856 |  |
| 22641 | RNA, Small Interfering | HIST1H3H   | 0.000002 | 3.595731 |  |
| 22642 | RNA, Small Interfering | RRAD       | 0.000001 | 3.668734 |  |
| 22643 | RNA, Small Interfering | HIST1H2BD  | 0        | 3.712095 |  |
| 22644 | RNA, Small Interfering | CTSG       | 0.000001 | 3.754189 |  |
| 22645 | RNA, Small Interfering | HIST2H2AA4 | 0.000001 | 3.778594 |  |
| 22646 | RNA, Small Interfering | HIST1H2AD  | 0.000002 | 4.007391 |  |
| 22647 | RNA, Small Interfering | DACT3      | 0.000001 | 4.12493  |  |
| 22648 | RNA, Small Interfering | ASMT       | 0.000001 | 4.146187 |  |



|       |                                       |            |          |           |  |
|-------|---------------------------------------|------------|----------|-----------|--|
| 22649 | RNA, Small Interfering                | GZMB       | 0        | 4.160592  |  |
| 22650 | RNA, Small Interfering                | DDIT4      | 0.024419 | 4.482117  |  |
| 22651 | RNA, Small Interfering                | LILRB3     | 0.000001 | 4.497505  |  |
| 22652 | RNA, Small Interfering                | C5orf27    | 0.000001 | 4.82028   |  |
| 22653 | RNA, Small Interfering                | RASD1      | 0        | 5.446898  |  |
| 22654 | RNA, Small Interfering                | HIST1H3F   | 0        | 6.362996  |  |
| 22655 | S100A12 protein, human                | CES2       | 0.000751 | -2.214224 |  |
| 22656 | S100A12 protein, human                | OAS1       | 0.004728 | 2.021775  |  |
| 22657 | S100A12 protein, human                | RAB6IP1    | 0        | 2.15584   |  |
| 22658 | S100A12 protein, human                | SYK        | 0.000765 | 2.237635  |  |
| 22659 | S100A12 protein, human                | TSPAN1     | 0.015027 | 2.403828  |  |
| 22660 | S100A12 protein, human                | MGC11242   | 0.042262 | 2.464037  |  |
| 22661 | S100A12 protein, human                | KLF13      | 0.008887 | 2.916756  |  |
| 22662 | S100A12 protein, human                | CKB        | 0.00004  | 3.319031  |  |
| 22663 | S100A12 protein, human                | PTP4A3     | 0.002022 | 3.737014  |  |
| 22664 | Schizophrenia                         | M-RIP      | 0.028743 | -2.378667 |  |
| 22665 | Schizophrenia                         | OXTR       | 0.028743 | 2.132131  |  |
| 22666 | Scientific Study                      | ACBD3      | 0.007851 | -3.97229  |  |
| 22667 | Scientific Study                      | KRTAP5-5   | 0.007148 | -3.883056 |  |
| 22668 | Scientific Study                      | HLA-C      | 0.006669 | -3.673555 |  |
| 22669 | Scientific Study                      | ROBO2      | 0.00448  | -3.662034 |  |
| 22670 | Scientific Study                      | HLA-DQB1   | 0.006388 | -2.89817  |  |
| 22671 | Scientific Study                      | NCOA4      | 0.005756 | -2.70302  |  |
| 22672 | Scientific Study                      | PALLD      | 0.005369 | -2.534954 |  |
| 22673 | Scientific Study                      | CHUK       | 0.00462  | -2.466915 |  |
| 22674 | Secondary malignant neoplasm of liver | GUCA2A     | 0        | -8.661259 |  |
| 22675 | Secondary malignant neoplasm of liver | SLC26A3    | 0.000017 | -7.67746  |  |
| 22676 | Secondary malignant neoplasm of liver | DMN        | 0        | -7.500718 |  |
| 22677 | Secondary malignant neoplasm of liver | IGLV1-40   | 0        | -7.476615 |  |
| 22678 | Secondary malignant neoplasm of liver | MUC2       | 0        | -7.367205 |  |
| 22679 | Secondary malignant neoplasm of liver | MFAP5      | 0        | -7.082286 |  |
| 22680 | Secondary malignant neoplasm of liver | IGHA1      | 0        | -6.57383  |  |
| 22681 | Secondary malignant neoplasm of liver | MMP1       | 0        | -6.222971 |  |
| 22682 | Secondary malignant neoplasm of liver | CHGA       | 0.000004 | -6.084005 |  |
| 22683 | Secondary malignant neoplasm of liver | DES        | 0        | -6.019378 |  |
| 22684 | Secondary malignant neoplasm of liver | CHRD1      | 0        | -5.85837  |  |
| 22685 | Secondary malignant neoplasm of liver | LMO3       | 0        | -5.73808  |  |
| 22686 | Secondary malignant neoplasm of liver | CNN1       | 0        | -5.726561 |  |
| 22687 | Secondary malignant neoplasm of liver | IGLL1      | 0        | -5.290361 |  |
| 22688 | Secondary malignant neoplasm of liver | PLN        | 0        | -5.142187 |  |
| 22689 | Secondary malignant neoplasm of liver | PDE5A      | 0        | -5.13904  |  |
| 22690 | Secondary malignant neoplasm of liver | IGKV1-5    | 0        | -4.874983 |  |
| 22691 | Secondary malignant neoplasm of liver | FHL1       | 0        | -4.750128 |  |
| 22692 | Secondary malignant neoplasm of liver | POU2AF1    | 0        | -4.745817 |  |
| 22693 | Secondary malignant neoplasm of liver | IGK@       | 0        | -4.692706 |  |
| 22694 | Secondary malignant neoplasm of liver | IGHM       | 0        | -4.602592 |  |
| 22695 | Secondary malignant neoplasm of liver | IGHV3-48   | 0        | -4.592864 |  |
| 22696 | Secondary malignant neoplasm of liver | PRPH       | 0        | -4.504848 |  |
| 22697 | Secondary malignant neoplasm of liver | HAND1      | 0        | -4.491088 |  |
| 22698 | Secondary malignant neoplasm of liver | ST6GALNAC1 | 0        | -4.4897   |  |

|       |                                       |              |          |           |  |
|-------|---------------------------------------|--------------|----------|-----------|--|
| 22699 | Secondary malignant neoplasm of liver | IGKC         | 0        | -4.358594 |  |
| 22700 | Secondary malignant neoplasm of liver | P2RY14       | 0        | -4.289047 |  |
| 22701 | Secondary malignant neoplasm of liver | LOC100508797 | 0        | -4.252415 |  |
| 22702 | Secondary malignant neoplasm of liver | IGHD         | 0        | -4.210615 |  |
| 22703 | Secondary malignant neoplasm of liver | LOC100507804 | 0        | -4.15266  |  |
| 22704 | Secondary malignant neoplasm of liver | IGKV3-20     | 0        | -4.097869 |  |
| 22705 | Secondary malignant neoplasm of liver | IGKV1D-8     | 0        | -4.09541  |  |
| 22706 | Secondary malignant neoplasm of liver | CXCL14       | 0.000133 | -4.05581  |  |
| 22707 | Secondary malignant neoplasm of liver | IGLJ3        | 0        | -4.034729 |  |
| 22708 | Secondary malignant neoplasm of liver | TPSAB1       | 0        | -4.029503 |  |
| 22709 | Secondary malignant neoplasm of liver | THBS4        | 0        | -3.966928 |  |
| 22710 | Secondary malignant neoplasm of liver | FAM55A       | 0        | -3.924033 |  |
| 22711 | Secondary malignant neoplasm of liver | CASQ2        | 0        | -3.861067 |  |
| 22712 | Secondary malignant neoplasm of liver | IGLV2-23     | 0        | -3.857226 |  |
| 22713 | Secondary malignant neoplasm of liver | APEG1        | 0        | -3.817307 |  |
| 22714 | Secondary malignant neoplasm of liver | ITLN1        | 0        | -3.790869 |  |
| 22715 | Secondary malignant neoplasm of liver | BEST2        | 0        | -3.779822 |  |
| 22716 | Secondary malignant neoplasm of liver | BAPX1        | 0        | -3.764069 |  |
| 22717 | Secondary malignant neoplasm of liver | LOC340843    | 0        | -3.741315 |  |
| 22718 | Secondary malignant neoplasm of liver | PLA2G10      | 0        | -3.722207 |  |
| 22719 | Secondary malignant neoplasm of liver | ATP1A2       | 0        | -3.719575 |  |
| 22720 | Secondary malignant neoplasm of liver | KCNMA1       | 0        | -3.648415 |  |
| 22721 | Secondary malignant neoplasm of liver | IGLL3P       | 0        | -3.632372 |  |
| 22722 | Secondary malignant neoplasm of liver | CHL1         | 0        | -3.539771 |  |
| 22723 | Secondary malignant neoplasm of liver | COL6A1       | 0        | -3.510292 |  |
| 22724 | Secondary malignant neoplasm of liver | REG4         | 0.000059 | -3.503367 |  |
| 22725 | Secondary malignant neoplasm of liver | WFDC1        | 0        | -3.487965 |  |
| 22726 | Secondary malignant neoplasm of liver | C14ORF132    | 0        | -3.474085 |  |
| 22727 | Secondary malignant neoplasm of liver | JPH2         | 0        | -3.444662 |  |
| 22728 | Secondary malignant neoplasm of liver | LOC91316     | 0        | -3.389754 |  |
| 22729 | Secondary malignant neoplasm of liver | RASL12       | 0        | -3.339297 |  |
| 22730 | Secondary malignant neoplasm of liver | IGLC7        | 0        | -3.331625 |  |
| 22731 | Secondary malignant neoplasm of liver | TWSG1        | 0        | -3.318707 |  |
| 22732 | Secondary malignant neoplasm of liver | GREM1        | 0        | -3.268083 |  |
| 22733 | Secondary malignant neoplasm of liver | EPB41L3      | 0        | -3.256519 |  |
| 22734 | Secondary malignant neoplasm of liver | IGLL5        | 0        | -3.245964 |  |
| 22735 | Secondary malignant neoplasm of liver | NKX2-3       | 0        | -3.194695 |  |
| 22736 | Secondary malignant neoplasm of liver | IGL@         | 0        | -3.185547 |  |
| 22737 | Secondary malignant neoplasm of liver | CLDN8        | 0        | -3.15702  |  |
| 22738 | Secondary malignant neoplasm of liver | PRKAR2B      | 0        | -3.156296 |  |
| 22739 | Secondary malignant neoplasm of liver | TPSB2        | 0        | -3.153278 |  |
| 22740 | Secondary malignant neoplasm of liver | IGLV1-44     | 0        | -3.125024 |  |
| 22741 | Secondary malignant neoplasm of liver | SLC4A4       | 0        | -3.114459 |  |
| 22742 | Secondary malignant neoplasm of liver | CALD1        | 0        | -3.105043 |  |
| 22743 | Secondary malignant neoplasm of liver | SELENBP1     | 0.000071 | -3.066158 |  |
| 22744 | Secondary malignant neoplasm of liver | DARC         | 0.000001 | -3.028116 |  |
| 22745 | Secondary malignant neoplasm of liver | PSG4         | 0.004305 | -3.006374 |  |
| 22746 | Secondary malignant neoplasm of liver | AKR1B10      | 0.000698 | -3.002267 |  |
| 22747 | Secondary malignant neoplasm of liver | LRRN2        | 0        | -2.998523 |  |
| 22748 | Secondary malignant neoplasm of liver | HOXD11       | 0        | -2.977418 |  |

|       |                                       |          |          |           |  |
|-------|---------------------------------------|----------|----------|-----------|--|
| 22749 | Secondary malignant neoplasm of liver | MKKS     | 0.003646 | -2.939498 |  |
| 22750 | Secondary malignant neoplasm of liver | WNT5A    | 0        | -2.911278 |  |
| 22751 | Secondary malignant neoplasm of liver | VMD2L1   | 0.000134 | -2.885943 |  |
| 22752 | Secondary malignant neoplasm of liver | SSPN     | 0        | -2.865316 |  |
| 22753 | Secondary malignant neoplasm of liver | GCG      | 0        | -2.841612 |  |
| 22754 | Secondary malignant neoplasm of liver | OGDH     | 0.000409 | -2.824938 |  |
| 22755 | Secondary malignant neoplasm of liver | GPA33    | 0.000665 | -2.816748 |  |
| 22756 | Secondary malignant neoplasm of liver | SAHH3    | 0.000006 | -2.796622 |  |
| 22757 | Secondary malignant neoplasm of liver | TOX      | 0        | -2.793252 |  |
| 22758 | Secondary malignant neoplasm of liver | ITM2A    | 0        | -2.755766 |  |
| 22759 | Secondary malignant neoplasm of liver | CA12     | 0.000281 | -2.753664 |  |
| 22760 | Secondary malignant neoplasm of liver | MEOX2    | 0        | -2.729391 |  |
| 22761 | Secondary malignant neoplasm of liver | ZFYVE1   | 0        | -2.721154 |  |
| 22762 | Secondary malignant neoplasm of liver | HSD11B2  | 0.000411 | -2.707869 |  |
| 22763 | Secondary malignant neoplasm of liver | OLFML2A  | 0        | -2.701749 |  |
| 22764 | Secondary malignant neoplasm of liver | MMP2     | 0        | -2.683132 |  |
| 22765 | Secondary malignant neoplasm of liver | SPON1    | 0.000432 | -2.646048 |  |
| 22766 | Secondary malignant neoplasm of liver | CAPN9    | 0.000016 | -2.643441 |  |
| 22767 | Secondary malignant neoplasm of liver | LMOD1    | 0        | -2.638127 |  |
| 22768 | Secondary malignant neoplasm of liver | PDZD2    | 0        | -2.626499 |  |
| 22769 | Secondary malignant neoplasm of liver | CCL13    | 0.000261 | -2.615183 |  |
| 22770 | Secondary malignant neoplasm of liver | VCL      | 0        | -2.583848 |  |
| 22771 | Secondary malignant neoplasm of liver | STON1    | 0        | -2.562703 |  |
| 22772 | Secondary malignant neoplasm of liver | DACT3    | 0        | -2.549765 |  |
| 22773 | Secondary malignant neoplasm of liver | FLJ21511 | 0        | -2.545136 |  |
| 22774 | Secondary malignant neoplasm of liver | TNFRSF17 | 0        | -2.53665  |  |
| 22775 | Secondary malignant neoplasm of liver | AGR3     | 0.000704 | -2.508426 |  |
| 22776 | Secondary malignant neoplasm of liver | FOXF2    | 0        | -2.48074  |  |
| 22777 | Secondary malignant neoplasm of liver | SLCO2A1  | 0.000002 | -2.469144 |  |
| 22778 | Secondary malignant neoplasm of liver | CITED2   | 0        | -2.446933 |  |
| 22779 | Secondary malignant neoplasm of liver | TMIGD1   | 0        | -2.446872 |  |
| 22780 | Secondary malignant neoplasm of liver | MEIS1    | 0        | -2.442161 |  |
| 22781 | Secondary malignant neoplasm of liver | SERTAD4  | 0        | -2.433668 |  |
| 22782 | Secondary malignant neoplasm of liver | SYNC     | 0        | -2.431513 |  |
| 22783 | Secondary malignant neoplasm of liver | CTSK     | 0        | -2.415363 |  |
| 22784 | Secondary malignant neoplasm of liver | AGR2     | 0.000531 | -2.405779 |  |
| 22785 | Secondary malignant neoplasm of liver | KLF4     | 0        | -2.397191 |  |
| 22786 | Secondary malignant neoplasm of liver | ABP1     | 0.000179 | -2.385219 |  |
| 22787 | Secondary malignant neoplasm of liver | PDPN     | 0        | -2.374417 |  |
| 22788 | Secondary malignant neoplasm of liver | PGM5     | 0.000314 | -2.364494 |  |
| 22789 | Secondary malignant neoplasm of liver | PDZRN3   | 0        | -2.354119 |  |
| 22790 | Secondary malignant neoplasm of liver | ARHGAP1  | 0        | -2.348833 |  |
| 22791 | Secondary malignant neoplasm of liver | ENPP2    | 0        | -2.348584 |  |
| 22792 | Secondary malignant neoplasm of liver | TPM1     | 0        | -2.348216 |  |
| 22793 | Secondary malignant neoplasm of liver | SCARA5   | 0.000025 | -2.332101 |  |
| 22794 | Secondary malignant neoplasm of liver | NR3C2    | 0        | -2.319695 |  |
| 22795 | Secondary malignant neoplasm of liver | MYO1A    | 0.000642 | -2.309044 |  |
| 22796 | Secondary malignant neoplasm of liver | INSL5    | 0        | -2.298135 |  |
| 22797 | Secondary malignant neoplasm of liver | NNAT     | 0        | -2.292745 |  |
| 22798 | Secondary malignant neoplasm of liver | SCNN1B   | 0.000177 | -2.287546 |  |

|       |                                       |           |          |           |  |
|-------|---------------------------------------|-----------|----------|-----------|--|
| 22799 | Secondary malignant neoplasm of liver | FAM46C    | 0.000021 | -2.273251 |  |
| 22800 | Secondary malignant neoplasm of liver | C15orf48  | 0.000105 | -2.264361 |  |
| 22801 | Secondary malignant neoplasm of liver | FRZB      | 0.000071 | -2.263728 |  |
| 22802 | Secondary malignant neoplasm of liver | IGFBP5    | 0        | -2.251161 |  |
| 22803 | Secondary malignant neoplasm of liver | BTNL3     | 0.000071 | -2.24713  |  |
| 22804 | Secondary malignant neoplasm of liver | MS4A8B    | 0.000135 | -2.245197 |  |
| 22805 | Secondary malignant neoplasm of liver | RGMA      | 0.000001 | -2.216106 |  |
| 22806 | Secondary malignant neoplasm of liver | BVES      | 0        | -2.211583 |  |
| 22807 | Secondary malignant neoplasm of liver | C5ORF5    | 0        | -2.20954  |  |
| 22808 | Secondary malignant neoplasm of liver | AOC3      | 0        | -2.202195 |  |
| 22809 | Secondary malignant neoplasm of liver | DIXDC1    | 0        | -2.201468 |  |
| 22810 | Secondary malignant neoplasm of liver | OXCT1     | 0        | -2.196845 |  |
| 22811 | Secondary malignant neoplasm of liver | TMIGD     | 0.000335 | -2.196593 |  |
| 22812 | Secondary malignant neoplasm of liver | ITIH5     | 0        | -2.195423 |  |
| 22813 | Secondary malignant neoplasm of liver | COL6A2    | 0        | -2.183643 |  |
| 22814 | Secondary malignant neoplasm of liver | ZMIZ1     | 0        | -2.174006 |  |
| 22815 | Secondary malignant neoplasm of liver | HERC1     | 0.00032  | -2.164396 |  |
| 22816 | Secondary malignant neoplasm of liver | CTSG      | 0.000001 | -2.15913  |  |
| 22817 | Secondary malignant neoplasm of liver | CHN1      | 0        | -2.155797 |  |
| 22818 | Secondary malignant neoplasm of liver | ATP2A3    | 0        | -2.155052 |  |
| 22819 | Secondary malignant neoplasm of liver | SYNC1     | 0        | -2.154301 |  |
| 22820 | Secondary malignant neoplasm of liver | DRD1IP    | 0        | -2.152948 |  |
| 22821 | Secondary malignant neoplasm of liver | TSPAN7    | 0.000705 | -2.148268 |  |
| 22822 | Secondary malignant neoplasm of liver | LRCH2     | 0        | -2.1482   |  |
| 22823 | Secondary malignant neoplasm of liver | SOX15     | 0        | -2.145645 |  |
| 22824 | Secondary malignant neoplasm of liver | LAMA1     | 0        | -2.144402 |  |
| 22825 | Secondary malignant neoplasm of liver | TMEM54    | 0.000211 | -2.141421 |  |
| 22826 | Secondary malignant neoplasm of liver | TAGLN     | 0.003011 | -2.13702  |  |
| 22827 | Secondary malignant neoplasm of liver | PDE4D     | 0        | -2.133546 |  |
| 22828 | Secondary malignant neoplasm of liver | Q8NBX4    | 0.000102 | -2.127648 |  |
| 22829 | Secondary malignant neoplasm of liver | NSG1      | 0        | -2.121418 |  |
| 22830 | Secondary malignant neoplasm of liver | NLGN4X    | 0        | -2.116154 |  |
| 22831 | Secondary malignant neoplasm of liver | PLAT      | 0.000028 | -2.107739 |  |
| 22832 | Secondary malignant neoplasm of liver | HSPB3     | 0        | -2.092056 |  |
| 22833 | Secondary malignant neoplasm of liver | CSRP1     | 0.000153 | -2.081023 |  |
| 22834 | Secondary malignant neoplasm of liver | PBK       | 0        | -2.078584 |  |
| 22835 | Secondary malignant neoplasm of liver | RPRM      | 0        | -2.078294 |  |
| 22836 | Secondary malignant neoplasm of liver | ADSV      | 0.000576 | -2.070961 |  |
| 22837 | Secondary malignant neoplasm of liver | SCUBE2    | 0        | -2.068644 |  |
| 22838 | Secondary malignant neoplasm of liver | PTCHD1    | 0        | -2.064622 |  |
| 22839 | Secondary malignant neoplasm of liver | LOH11CR2A | 0.003159 | -2.056708 |  |
| 22840 | Secondary malignant neoplasm of liver | PDZRN4    | 0        | -2.044879 |  |
| 22841 | Secondary malignant neoplasm of liver | PLCL2     | 0        | -2.040657 |  |
| 22842 | Secondary malignant neoplasm of liver | ZMYND11   | 0        | -2.02749  |  |
| 22843 | Secondary malignant neoplasm of liver | FAS       | 0        | -2.026563 |  |
| 22844 | Secondary malignant neoplasm of liver | MGC29506  | 0        | -2.011257 |  |
| 22845 | Secondary malignant neoplasm of liver | PRRT2     | 0        | -2.008478 |  |
| 22846 | Secondary malignant neoplasm of liver | MALL      | 0.00058  | -2.001755 |  |
| 22847 | Secondary malignant neoplasm of liver | H19       | 0.002505 | 2.028469  |  |
| 22848 | Secondary malignant neoplasm of liver | C2        | 0.000472 | 2.039869  |  |

|       |                                       |           |          |          |  |
|-------|---------------------------------------|-----------|----------|----------|--|
| 22849 | Secondary malignant neoplasm of liver | CKLF      | 0        | 2.057666 |  |
| 22850 | Secondary malignant neoplasm of liver | MSLN      | 0.002114 | 2.196121 |  |
| 22851 | Secondary malignant neoplasm of liver | OLR1      | 0.000557 | 2.207088 |  |
| 22852 | Secondary malignant neoplasm of liver | COX6C     | 0        | 2.244844 |  |
| 22853 | Secondary malignant neoplasm of liver | LOC440589 | 0        | 2.249777 |  |
| 22854 | Secondary malignant neoplasm of liver | BGN       | 0.000689 | 2.378415 |  |
| 22855 | Secondary malignant neoplasm of liver | WDR12     | 0        | 2.379028 |  |
| 22856 | Secondary malignant neoplasm of liver | CBS       | 0.000703 | 2.411396 |  |
| 22857 | Secondary malignant neoplasm of liver | ADFP      | 0.00024  | 2.429958 |  |
| 22858 | Secondary malignant neoplasm of liver | ANGPTL4   | 0.000173 | 2.440066 |  |
| 22859 | Secondary malignant neoplasm of liver | ADAMTSL2  | 0.000012 | 2.453786 |  |
| 22860 | Secondary malignant neoplasm of liver | CYBA      | 0        | 2.455506 |  |
| 22861 | Secondary malignant neoplasm of liver | RPL29     | 0        | 2.488888 |  |
| 22862 | Secondary malignant neoplasm of liver | CYP1B1    | 0.000314 | 2.525663 |  |
| 22863 | Secondary malignant neoplasm of liver | CTSB      | 0        | 2.543662 |  |
| 22864 | Secondary malignant neoplasm of liver | ALDH4A1   | 0.000232 | 2.672146 |  |
| 22865 | Secondary malignant neoplasm of liver | CGNL1     | 0.000004 | 2.694607 |  |
| 22866 | Secondary malignant neoplasm of liver | CFHL1     | 0.002892 | 2.741774 |  |
| 22867 | Secondary malignant neoplasm of liver | AZGP1     | 0.002972 | 2.844943 |  |
| 22868 | Secondary malignant neoplasm of liver | TRIF      | 0.000391 | 2.916183 |  |
| 22869 | Secondary malignant neoplasm of liver | NNMT      | 0.000273 | 2.93126  |  |
| 22870 | Secondary malignant neoplasm of liver | CFI       | 0.000174 | 2.93439  |  |
| 22871 | Secondary malignant neoplasm of liver | INHBE     | 0.000642 | 2.971835 |  |
| 22872 | Secondary malignant neoplasm of liver | TM4SF4    | 0.000002 | 2.983023 |  |
| 22873 | Secondary malignant neoplasm of liver | C10orf10  | 0.000005 | 2.992878 |  |
| 22874 | Secondary malignant neoplasm of liver | RPL38     | 0        | 3.002224 |  |
| 22875 | Secondary malignant neoplasm of liver | LOC441775 | 0        | 3.107298 |  |
| 22876 | Secondary malignant neoplasm of liver | F5        | 0.00014  | 3.231423 |  |
| 22877 | Secondary malignant neoplasm of liver | BF        | 0.000076 | 3.280719 |  |
| 22878 | Secondary malignant neoplasm of liver | CDH2      | 0        | 3.362404 |  |
| 22879 | Secondary malignant neoplasm of liver | HABP2     | 0.000351 | 3.485311 |  |
| 22880 | Secondary malignant neoplasm of liver | VNN1      | 0.000533 | 3.670827 |  |
| 22881 | Secondary malignant neoplasm of liver | GRINA     | 0        | 3.747434 |  |
| 22882 | Secondary malignant neoplasm of liver | APOE      | 0        | 3.797515 |  |
| 22883 | Secondary malignant neoplasm of liver | AQP9      | 0.000053 | 3.849158 |  |
| 22884 | Secondary malignant neoplasm of liver | HSD11B1   | 0.000121 | 3.932743 |  |
| 22885 | Secondary malignant neoplasm of liver | SERF2     | 0        | 4.007006 |  |
| 22886 | Secondary malignant neoplasm of liver | TXN       | 0        | 4.097941 |  |
| 22887 | Secondary malignant neoplasm of liver | ASGR2     | 0.000553 | 4.302714 |  |
| 22888 | Secondary malignant neoplasm of liver | SERPINA5  | 0.000352 | 4.345646 |  |
| 22889 | Secondary malignant neoplasm of liver | ALDOB     | 0.001493 | 4.480913 |  |
| 22890 | Secondary malignant neoplasm of liver | SULT2A1   | 0.000605 | 4.720173 |  |
| 22891 | Secondary malignant neoplasm of liver | FMO3      | 0.000071 | 4.720673 |  |
| 22892 | Secondary malignant neoplasm of liver | RPS15A    | 0        | 4.778026 |  |
| 22893 | Secondary malignant neoplasm of liver | SERPINF2  | 0.00067  | 4.841546 |  |
| 22894 | Secondary malignant neoplasm of liver | SPP1      | 0.000007 | 5.105742 |  |
| 22895 | Secondary malignant neoplasm of liver | RPL35A    | 0        | 5.301532 |  |
| 22896 | Secondary malignant neoplasm of liver | CP        | 0.00038  | 5.509002 |  |
| 22897 | Secondary malignant neoplasm of liver | CPB2      | 0.000432 | 5.613978 |  |
| 22898 | Secondary malignant neoplasm of liver | C3        | 0.000006 | 5.668511 |  |

|       |                                       |          |          |            |  |
|-------|---------------------------------------|----------|----------|------------|--|
| 22899 | Secondary malignant neoplasm of liver | RPS17    | 0        | 5.675517   |  |
| 22900 | Secondary malignant neoplasm of liver | SLC13A5  | 0.000331 | 6.076943   |  |
| 22901 | Secondary malignant neoplasm of liver | C8A      | 0.000531 | 6.120991   |  |
| 22902 | Secondary malignant neoplasm of liver | RBP4     | 0.000557 | 6.658636   |  |
| 22903 | Secondary malignant neoplasm of liver | ASGR1    | 0.000048 | 6.679332   |  |
| 22904 | Secondary malignant neoplasm of liver | C5       | 0.00011  | 6.687382   |  |
| 22905 | Secondary malignant neoplasm of liver | APOH     | 0.000429 | 6.75181    |  |
| 22906 | Secondary malignant neoplasm of liver | FCN3     | 0.000009 | 6.844049   |  |
| 22907 | Secondary malignant neoplasm of liver | APOC2    | 0.000051 | 6.904064   |  |
| 22908 | Secondary malignant neoplasm of liver | AGXT     | 0.000773 | 6.935567   |  |
| 22909 | Secondary malignant neoplasm of liver | HPD      | 0.000531 | 7.014538   |  |
| 22910 | Secondary malignant neoplasm of liver | ITIH2    | 0.000149 | 7.015858   |  |
| 22911 | Secondary malignant neoplasm of liver | C6       | 0.00046  | 7.054535   |  |
| 22912 | Secondary malignant neoplasm of liver | SAA1     | 0.000035 | 7.064054   |  |
| 22913 | Secondary malignant neoplasm of liver | SAA4     | 0.000529 | 7.065      |  |
| 22914 | Secondary malignant neoplasm of liver | PLG      | 0.000498 | 7.361402   |  |
| 22915 | Secondary malignant neoplasm of liver | ITIH1    | 0.000337 | 7.554118   |  |
| 22916 | Secondary malignant neoplasm of liver | C4BPA    | 0.000535 | 7.948833   |  |
| 22917 | Secondary malignant neoplasm of liver | APOC1    | 0.000001 | 8.000367   |  |
| 22918 | Secondary malignant neoplasm of liver | TTR      | 0.000676 | 8.109081   |  |
| 22919 | Secondary malignant neoplasm of liver | CYP2C8   | 0.000673 | 8.207707   |  |
| 22920 | Secondary malignant neoplasm of liver | LBP      | 0.000127 | 8.984359   |  |
| 22921 | Secondary malignant neoplasm of liver | HAMP     | 0.000059 | 9.033264   |  |
| 22922 | Secondary malignant neoplasm of liver | APCS     | 0.000082 | 9.596353   |  |
| 22923 | Secondary malignant neoplasm of liver | KNG1     | 0.000331 | 10.388199  |  |
| 22924 | Secondary malignant neoplasm of liver | HRG      | 0.000312 | 11.044669  |  |
| 22925 | Secondary malignant neoplasm of liver | SERPINC1 | 0.000285 | 11.791284  |  |
| 22926 | Secondary malignant neoplasm of liver | SERPINA3 | 0.000001 | 11.942192  |  |
| 22927 | Secondary malignant neoplasm of liver | APOB     | 0.000088 | 13.0809    |  |
| 22928 | Secondary malignant neoplasm of liver | AHSG     | 0.000112 | 13.371622  |  |
| 22929 | Secondary malignant neoplasm of liver | APOC3    | 0.000181 | 13.701454  |  |
| 22930 | Secondary malignant neoplasm of liver | HPX      | 0.000192 | 14.287143  |  |
| 22931 | Secondary malignant neoplasm of liver | FGG      | 0.000014 | 14.651355  |  |
| 22932 | Secondary malignant neoplasm of liver | F2       | 0.000047 | 15.443368  |  |
| 22933 | Secondary malignant neoplasm of liver | VTN      | 0.000044 | 15.844447  |  |
| 22934 | Secondary malignant neoplasm of liver | ORM2     | 0.00009  | 16.094898  |  |
| 22935 | Secondary malignant neoplasm of liver | CYP2E1   | 0.000072 | 16.227626  |  |
| 22936 | Secondary malignant neoplasm of liver | FGL1     | 0.000039 | 18.32827   |  |
| 22937 | Secondary malignant neoplasm of liver | TF       | 0.000068 | 18.608249  |  |
| 22938 | Secondary malignant neoplasm of liver | GC       | 0.000013 | 20.947027  |  |
| 22939 | Secondary malignant neoplasm of liver | AMBP     | 0.000021 | 21.099729  |  |
| 22940 | Secondary malignant neoplasm of liver | APOA2    | 0.000023 | 21.365529  |  |
| 22941 | Secondary malignant neoplasm of liver | ALB      | 0.000007 | 23.019959  |  |
| 22942 | Secondary malignant neoplasm of liver | APOA1    | 0.000018 | 23.169381  |  |
| 22943 | Secondary malignant neoplasm of liver | FGB      | 0.000008 | 23.984148  |  |
| 22944 | Secondary malignant neoplasm of liver | FGA      | 0.000008 | 25.158992  |  |
| 22945 | Secondary malignant neoplasm of liver | ORM1     | 0.000008 | 25.514711  |  |
| 22946 | Secondary malignant neoplasm of lung  | ZG16     | 0        | -29.964456 |  |
| 22947 | Secondary malignant neoplasm of lung  | CLCA4    | 0        | -20.537645 |  |
| 22948 | Secondary malignant neoplasm of lung  | GPM6A    | 0        | -13.853163 |  |

|       |                                      |              |   |            |  |
|-------|--------------------------------------|--------------|---|------------|--|
| 22949 | Secondary malignant neoplasm of lung | SPINK4       | 0 | -13.465482 |  |
| 22950 | Secondary malignant neoplasm of lung | MAB21L2      | 0 | -10.983295 |  |
| 22951 | Secondary malignant neoplasm of lung | UGT2B17      | 0 | -10.643243 |  |
| 22952 | Secondary malignant neoplasm of lung | MS4A12       | 0 | -7.205396  |  |
| 22953 | Secondary malignant neoplasm of lung | MT1M         | 0 | -6.978645  |  |
| 22954 | Secondary malignant neoplasm of lung | MUC2         | 0 | -6.619673  |  |
| 22955 | Secondary malignant neoplasm of lung | DES          | 0 | -6.381146  |  |
| 22956 | Secondary malignant neoplasm of lung | CLCA1        | 0 | -6.043342  |  |
| 22957 | Secondary malignant neoplasm of lung | SYNM         | 0 | -5.719373  |  |
| 22958 | Secondary malignant neoplasm of lung | PCK1         | 0 | -5.468067  |  |
| 22959 | Secondary malignant neoplasm of lung | ACTG2        | 0 | -5.123446  |  |
| 22960 | Secondary malignant neoplasm of lung | UGT2B15      | 0 | -5.05358   |  |
| 22961 | Secondary malignant neoplasm of lung | CWH43        | 0 | -5.032682  |  |
| 22962 | Secondary malignant neoplasm of lung | CA2          | 0 | -5.027271  |  |
| 22963 | Secondary malignant neoplasm of lung | CNN1         | 0 | -4.511228  |  |
| 22964 | Secondary malignant neoplasm of lung | ADAMDEC1     | 0 | -3.897804  |  |
| 22965 | Secondary malignant neoplasm of lung | ZNF771       | 0 | -3.665034  |  |
| 22966 | Secondary malignant neoplasm of lung | NPY1R        | 0 | -3.492776  |  |
| 22967 | Secondary malignant neoplasm of lung | FHL1         | 0 | -3.384516  |  |
| 22968 | Secondary malignant neoplasm of lung | CDHR5        | 0 | -3.382035  |  |
| 22969 | Secondary malignant neoplasm of lung | IL1R2        | 0 | -3.364265  |  |
| 22970 | Secondary malignant neoplasm of lung | UGT1A1       | 0 | -3.361537  |  |
| 22971 | Secondary malignant neoplasm of lung | DNASE1L3     | 0 | -3.330532  |  |
| 22972 | Secondary malignant neoplasm of lung | MATN2        | 0 | -3.310375  |  |
| 22973 | Secondary malignant neoplasm of lung | SLC4A4       | 0 | -3.182669  |  |
| 22974 | Secondary malignant neoplasm of lung | EIF4G2       | 0 | -2.98055   |  |
| 22975 | Secondary malignant neoplasm of lung | HSPA2        | 0 | -2.947619  |  |
| 22976 | Secondary malignant neoplasm of lung | FMO5         | 0 | -2.947409  |  |
| 22977 | Secondary malignant neoplasm of lung | MAOA         | 0 | -2.750041  |  |
| 22978 | Secondary malignant neoplasm of lung | VIP          | 0 | -2.731216  |  |
| 22979 | Secondary malignant neoplasm of lung | TPH1         | 0 | -2.679425  |  |
| 22980 | Secondary malignant neoplasm of lung | PLA2G4A      | 0 | -2.665031  |  |
| 22981 | Secondary malignant neoplasm of lung | ABCA8        | 0 | -2.622711  |  |
| 22982 | Secondary malignant neoplasm of lung | PTPN11       | 0 | -2.594371  |  |
| 22983 | Secondary malignant neoplasm of lung | PRKAR2B      | 0 | -2.549393  |  |
| 22984 | Secondary malignant neoplasm of lung | UGT1A8       | 0 | -2.549025  |  |
| 22985 | Secondary malignant neoplasm of lung | KCNMA1       | 0 | -2.522512  |  |
| 22986 | Secondary malignant neoplasm of lung | NAT2         | 0 | -2.452153  |  |
| 22987 | Secondary malignant neoplasm of lung | CTH          | 0 | -2.447057  |  |
| 22988 | Secondary malignant neoplasm of lung | NR3C2        | 0 | -2.436797  |  |
| 22989 | Secondary malignant neoplasm of lung | TOX          | 0 | -2.436251  |  |
| 22990 | Secondary malignant neoplasm of lung | DYNC111      | 0 | -2.408172  |  |
| 22991 | Secondary malignant neoplasm of lung | ARL14        | 0 | -2.392322  |  |
| 22992 | Secondary malignant neoplasm of lung | P2RY14       | 0 | -2.370545  |  |
| 22993 | Secondary malignant neoplasm of lung | PTGER2       | 0 | -2.28567   |  |
| 22994 | Secondary malignant neoplasm of lung | SCAMP1       | 0 | -2.266666  |  |
| 22995 | Secondary malignant neoplasm of lung | MMP28        | 0 | -2.245387  |  |
| 22996 | Secondary malignant neoplasm of lung | EXOC5        | 0 | -2.228186  |  |
| 22997 | Secondary malignant neoplasm of lung | STK17A       | 0 | -2.216876  |  |
| 22998 | Secondary malignant neoplasm of lung | LOC100506517 | 0 | -2.14702   |  |

|       |                                      |            |          |           |  |
|-------|--------------------------------------|------------|----------|-----------|--|
| 22999 | Secondary malignant neoplasm of lung | ALDH6A1    | 0        | -2.116316 |  |
| 23000 | Secondary malignant neoplasm of lung | AKAP7      | 0        | -2.100857 |  |
| 23001 | Secondary malignant neoplasm of lung | TFPI2      | 0        | -2.095608 |  |
| 23002 | Secondary malignant neoplasm of lung | SLC35D1    | 0        | -2.072882 |  |
| 23003 | Secondary malignant neoplasm of lung | ASPA       | 0        | -2.044247 |  |
| 23004 | Secondary malignant neoplasm of lung | CHRNE      | 0        | -2.033283 |  |
| 23005 | Secondary malignant neoplasm of lung | NLGN4X     | 0        | -2.032991 |  |
| 23006 | Staphylococcal Protein A             | HMGA1      | 0.000094 | -9.960206 |  |
| 23007 | Staphylococcal Protein A             | EIF4EBP2   | 0.000549 | -2.475915 |  |
| 23008 | Staphylococcal Protein A             | LZTS1      | 0.000003 | -2.240321 |  |
| 23009 | Staphylococcal Protein A             | MAL2       | 0.000794 | -2.098098 |  |
| 23010 | Staphylococcal Protein A             | CDK4       | 0.001899 | -2.075749 |  |
| 23011 | Staphylococcal Protein A             | GLS2       | 0.0029   | -2.02811  |  |
| 23012 | Staphylococcal Protein A             | C19orf42   | 0.000009 | -2.000794 |  |
| 23013 | Stomach Diseases                     | COL18A1    | 0.000012 | 2.054137  |  |
| 23014 | Stomach Diseases                     | SCAF1      | 0.000072 | 2.493133  |  |
| 23015 | Stomach Diseases                     | CTSH       | 0.000009 | 2.667604  |  |
| 23016 | Stomach Diseases                     | LOC728448  | 0.000219 | 3.813428  |  |
| 23017 | Stomach normal                       | EDG2       | 0.005428 | 2.07883   |  |
| 23018 | Stomach normal                       | SCAF1      | 0.001266 | 2.126431  |  |
| 23019 | Stomach normal                       | COL18A1    | 0.000318 | 2.264734  |  |
| 23020 | Stomach normal                       | ANKRD11    | 0.000022 | 2.67729   |  |
| 23021 | Stomach normal                       | ENOSF1     | 0.000073 | 3.006317  |  |
| 23022 | Syndrome                             | KRT23      | 0.01294  | -3.193564 |  |
| 23023 | Syndrome                             | SLC22A11   | 0.035716 | -3.132747 |  |
| 23024 | Syndrome                             | F7         | 0.009004 | -3.058259 |  |
| 23025 | Syndrome                             | PKLR       | 0.009334 | -2.823042 |  |
| 23026 | Syndrome                             | PPP2R2C    | 0.012359 | -2.663028 |  |
| 23027 | Syndrome                             | PIWIL1     | 0.03469  | -2.641758 |  |
| 23028 | Syndrome                             | NODAL      | 0.004931 | -2.566286 |  |
| 23029 | Syndrome                             | PAH        | 0.011581 | -2.565458 |  |
| 23030 | Syndrome                             | PLA2G12B   | 0.022296 | -2.562045 |  |
| 23031 | Syndrome                             | UMODL1     | 0.002468 | -2.519158 |  |
| 23032 | Syndrome                             | NOX1       | 0.000276 | -2.476758 |  |
| 23033 | Syndrome                             | GRM8       | 0.000276 | -2.453255 |  |
| 23034 | Syndrome                             | C6orf15    | 0.022668 | -2.449986 |  |
| 23035 | Syndrome                             | PCP4       | 0.010349 | -2.336584 |  |
| 23036 | Syndrome                             | GAS2       | 0.000014 | -2.302761 |  |
| 23037 | Syndrome                             | NKD1       | 0.003627 | -2.224193 |  |
| 23038 | Syndrome                             | KRT6B      | 0.028373 | -2.206861 |  |
| 23039 | Syndrome                             | CEL        | 0.019019 | -2.072682 |  |
| 23040 | Syndrome                             | PON3       | 0.000276 | -2.042103 |  |
| 23041 | Syndrome                             | RERGL      | 0.035657 | -2.0279   |  |
| 23042 | Syndrome                             | HOXA3      | 0.006324 | -2.012612 |  |
| 23043 | Syndrome                             | XIST       | 0.000003 | 1.801367  |  |
| 23044 | Syndrome                             | BNIP3      | 0.008021 | 2.029302  |  |
| 23045 | Syndrome                             | KCNG3      | 0.038146 | 2.101529  |  |
| 23046 | Syndrome                             | NCRNA00173 | 0.027758 | 2.148351  |  |
| 23047 | TACSTD2 protein, human               | TACSTD2    | 0        | -9.454059 |  |
| 23048 | TACSTD2 protein, human               | VMA21      | 0.004565 | -2.260221 |  |



|       |                        |              |          |             |  |
|-------|------------------------|--------------|----------|-------------|--|
| 23049 | TACSTD2 protein, human | TNFRSF11B    | 0        | 2.511447    |  |
| 23050 | TACSTD2 protein, human | ALB          | 0        | 3.762161    |  |
| 23051 | TCF7L2 protein, human  | CYB5A        | 0.000114 | -497.719424 |  |
| 23052 | TCF7L2 protein, human  | PXDN         | 0.00003  | -34.689751  |  |
| 23053 | TCF7L2 protein, human  | ZIC2         | 0.000437 | -31.843284  |  |
| 23054 | TCF7L2 protein, human  | LITAF        | 0.000053 | -26.621554  |  |
| 23055 | TCF7L2 protein, human  | TCEA3        | 0.000058 | -23.553522  |  |
| 23056 | TCF7L2 protein, human  | EPB41L3      | 0.000351 | -22.172662  |  |
| 23057 | TCF7L2 protein, human  | UNC5A        | 0.000607 | -21.517442  |  |
| 23058 | TCF7L2 protein, human  | ABCB1        | 0.000482 | -18.547662  |  |
| 23059 | TCF7L2 protein, human  | TLE2         | 0.000486 | -15.588353  |  |
| 23060 | TCF7L2 protein, human  | PARVG        | 0.00005  | -15.210227  |  |
| 23061 | TCF7L2 protein, human  | LOC100289026 | 0.000015 | -13.35725   |  |
| 23062 | TCF7L2 protein, human  | NPL          | 0.000551 | -12.480296  |  |
| 23063 | TCF7L2 protein, human  | GNAL         | 0.00003  | -11.805769  |  |
| 23064 | TCF7L2 protein, human  | TNFRSF18     | 0.000187 | -9.901515   |  |
| 23065 | TCF7L2 protein, human  | RHBDL1       | 0.000075 | -8.661224   |  |
| 23066 | TCF7L2 protein, human  | TIMP3        | 0.000064 | -8.627737   |  |
| 23067 | TCF7L2 protein, human  | RAC3         | 0.000196 | -8.302583   |  |
| 23068 | TCF7L2 protein, human  | CIB2         | 0.000564 | -8.107981   |  |
| 23069 | TCF7L2 protein, human  | KLC3         | 0.000382 | -7.331104   |  |
| 23070 | TCF7L2 protein, human  | C11orf93     | 0.000061 | -7.250724   |  |
| 23071 | TCF7L2 protein, human  | C11orf53     | 0.000115 | -7.249453   |  |
| 23072 | TCF7L2 protein, human  | TTL          | 0.000202 | -7.123457   |  |
| 23073 | TCF7L2 protein, human  | FUT1         | 0.000219 | -6.783496   |  |
| 23074 | TCF7L2 protein, human  | DLX2         | 0.000271 | -6.697201   |  |
| 23075 | TCF7L2 protein, human  | WNT4         | 0.000393 | -6.517647   |  |
| 23076 | TCF7L2 protein, human  | SLC6A10P     | 0.000156 | -6.252374   |  |
| 23077 | TCF7L2 protein, human  | GPR124       | 0.000137 | -6.185279   |  |
| 23078 | TCF7L2 protein, human  | IL1F7        | 0.000275 | -5.996226   |  |
| 23079 | TCF7L2 protein, human  | MRAS         | 0.000002 | -5.970402   |  |
| 23080 | TCF7L2 protein, human  | CDH3         | 0.000564 | -5.904728   |  |
| 23081 | TCF7L2 protein, human  | C11orf30     | 0.000021 | -5.900891   |  |
| 23082 | TCF7L2 protein, human  | ZNF704       | 0.000142 | -5.88162    |  |
| 23083 | TCF7L2 protein, human  | PRODH        | 0.000408 | -5.875641   |  |
| 23084 | TCF7L2 protein, human  | TCF4         | 0.000341 | -5.712788   |  |
| 23085 | TCF7L2 protein, human  | ABCC4        | 0.000219 | -5.561098   |  |
| 23086 | TCF7L2 protein, human  | APH1B        | 0.000114 | -5.553459   |  |
| 23087 | TCF7L2 protein, human  | LMF1         | 0.000513 | -5.430435   |  |
| 23088 | TCF7L2 protein, human  | C4orf19      | 0.000367 | -5.339512   |  |
| 23089 | TCF7L2 protein, human  | C1QTNF1      | 0.000228 | -5.327957   |  |
| 23090 | TCF7L2 protein, human  | GALNT12      | 0.000082 | -5.173536   |  |
| 23091 | TCF7L2 protein, human  | SORBS3       | 0.000259 | -5.101449   |  |
| 23092 | TCF7L2 protein, human  | MXRA7        | 0.000001 | -4.994552   |  |
| 23093 | TCF7L2 protein, human  | PDGFC        | 0.000001 | -4.989535   |  |
| 23094 | TCF7L2 protein, human  | CD70         | 0.000555 | -4.937659   |  |
| 23095 | TCF7L2 protein, human  | CDC42EP5     | 0.000176 | -4.798045   |  |
| 23096 | TCF7L2 protein, human  | FLJ37644     | 0.000413 | -4.712144   |  |
| 23097 | TCF7L2 protein, human  | SHH          | 0.000143 | -4.677488   |  |
| 23098 | TCF7L2 protein, human  | RAB26        | 0.000042 | -4.644335   |  |

|       |                       |           |          |           |  |
|-------|-----------------------|-----------|----------|-----------|--|
| 23099 | TCF7L2 protein, human | PHLDA3    | 0.00002  | -4.586603 |  |
| 23100 | TCF7L2 protein, human | ZNF358    | 0.000279 | -4.585557 |  |
| 23101 | TCF7L2 protein, human | FLJ36031  | 0.000142 | -4.480278 |  |
| 23102 | TCF7L2 protein, human | FSCN1     | 0.000014 | -4.370552 |  |
| 23103 | TCF7L2 protein, human | GXYLT2    | 0.000569 | -4.264637 |  |
| 23104 | TCF7L2 protein, human | LOC283104 | 0.000279 | -4.155987 |  |
| 23105 | TCF7L2 protein, human | FADS2     | 0.000551 | -3.903226 |  |
| 23106 | TCF7L2 protein, human | MCCC1     | 0.000187 | -3.848696 |  |
| 23107 | TCF7L2 protein, human | PROCR     | 0.000259 | -3.835196 |  |
| 23108 | TCF7L2 protein, human | FAM119A   | 0.000005 | -3.765769 |  |
| 23109 | TCF7L2 protein, human | LTBP3     | 0.000002 | -3.619344 |  |
| 23110 | TCF7L2 protein, human | FLJ41757  | 0.00048  | -3.605058 |  |
| 23111 | TCF7L2 protein, human | CNFN      | 0.000266 | -3.585442 |  |
| 23112 | TCF7L2 protein, human | ARHGAP32  | 0.00003  | -3.550023 |  |
| 23113 | TCF7L2 protein, human | LOC729680 | 0.000244 | -3.501818 |  |
| 23114 | TCF7L2 protein, human | PCCA      | 0.000125 | -3.463857 |  |
| 23115 | TCF7L2 protein, human | C19orf45  | 0.000612 | -3.436083 |  |
| 23116 | TCF7L2 protein, human | NOX1      | 0.000279 | -3.434399 |  |
| 23117 | TCF7L2 protein, human | NAGS      | 0.00012  | -3.375294 |  |
| 23118 | TCF7L2 protein, human | ATP6V1E2  | 0.000492 | -3.370556 |  |
| 23119 | TCF7L2 protein, human | AGMAT     | 0.000114 | -3.339683 |  |
| 23120 | TCF7L2 protein, human | AIFM3     | 0.000228 | -3.295077 |  |
| 23121 | TCF7L2 protein, human | HSPB1     | 0.00007  | -3.269693 |  |
| 23122 | TCF7L2 protein, human | KLF11     | 0.000219 | -3.248634 |  |
| 23123 | TCF7L2 protein, human | NEO1      | 0.000564 | -3.231681 |  |
| 23124 | TCF7L2 protein, human | KAZ       | 0.000187 | -3.209017 |  |
| 23125 | TCF7L2 protein, human | HYI       | 0.000441 | -3.155569 |  |
| 23126 | TCF7L2 protein, human | THNSL1    | 0.000149 | -3.124434 |  |
| 23127 | TCF7L2 protein, human | ATPBD4    | 0.000112 | -3.109684 |  |
| 23128 | TCF7L2 protein, human | MDK       | 0.000446 | -3.092344 |  |
| 23129 | TCF7L2 protein, human | ASPHD2    | 0.000341 | -3.03538  |  |
| 23130 | TCF7L2 protein, human | ATP13A2   | 0.0002   | -3.004528 |  |
| 23131 | TCF7L2 protein, human | CPS1      | 0.000002 | -2.967478 |  |
| 23132 | TCF7L2 protein, human | LOC255512 | 0.000361 | -2.94404  |  |
| 23133 | TCF7L2 protein, human | ARHGEF10  | 0.000279 | -2.912243 |  |
| 23134 | TCF7L2 protein, human | KRTCAP3   | 0.000414 | -2.902283 |  |
| 23135 | TCF7L2 protein, human | C9orf40   | 0.000602 | -2.854545 |  |
| 23136 | TCF7L2 protein, human | MMS19     | 0.000018 | -2.84468  |  |
| 23137 | TCF7L2 protein, human | CLN3      | 0.000412 | -2.84375  |  |
| 23138 | TCF7L2 protein, human | SH2D2A    | 0.000499 | -2.836379 |  |
| 23139 | TCF7L2 protein, human | DPH5      | 0.000437 | -2.807949 |  |
| 23140 | TCF7L2 protein, human | DNAJC4    | 0.000125 | -2.793849 |  |
| 23141 | TCF7L2 protein, human | RPL35A    | 0.000129 | -2.785454 |  |
| 23142 | TCF7L2 protein, human | CNDP2     | 0.00012  | -2.744491 |  |
| 23143 | TCF7L2 protein, human | PKIG      | 0.000445 | -2.741006 |  |
| 23144 | TCF7L2 protein, human | KLK12     | 0.000259 | -2.740593 |  |
| 23145 | TCF7L2 protein, human | ALDOC     | 0.000382 | -2.711191 |  |
| 23146 | TCF7L2 protein, human | SH3YL1    | 0.000002 | -2.683318 |  |
| 23147 | TCF7L2 protein, human | GAMT      | 0.000143 | -2.666422 |  |
| 23148 | TCF7L2 protein, human | GAS5      | 0.000142 | -2.653625 |  |

|       |                       |             |          |           |  |
|-------|-----------------------|-------------|----------|-----------|--|
| 23149 | TCF7L2 protein, human | WDYHV1      | 0.000235 | -2.653118 |  |
| 23150 | TCF7L2 protein, human | RPL13A      | 0.000331 | -2.645398 |  |
| 23151 | TCF7L2 protein, human | HAUS4       | 0.000177 | -2.620348 |  |
| 23152 | TCF7L2 protein, human | DYRK4       | 0.00007  | -2.615305 |  |
| 23153 | TCF7L2 protein, human | SLC25A21    | 0.000271 | -2.542119 |  |
| 23154 | TCF7L2 protein, human | C9orf86     | 0.000367 | -2.540431 |  |
| 23155 | TCF7L2 protein, human | STRADB      | 0.000143 | -2.532233 |  |
| 23156 | TCF7L2 protein, human | SMARCD3     | 0.000128 | -2.530565 |  |
| 23157 | TCF7L2 protein, human | NOB1        | 0.000553 | -2.523267 |  |
| 23158 | TCF7L2 protein, human | MARVELD1    | 0.000568 | -2.514161 |  |
| 23159 | TCF7L2 protein, human | DPY30       | 0.000143 | -2.4865   |  |
| 23160 | TCF7L2 protein, human | GDF11       | 0.000432 | -2.480144 |  |
| 23161 | TCF7L2 protein, human | C4orf14     | 0.000437 | -2.47461  |  |
| 23162 | TCF7L2 protein, human | TBC1D1      | 0.000308 | -2.448241 |  |
| 23163 | TCF7L2 protein, human | SNORD104    | 0.000624 | -2.440978 |  |
| 23164 | TCF7L2 protein, human | SLC25A6     | 0.00034  | -2.434351 |  |
| 23165 | TCF7L2 protein, human | PYGL        | 0.000602 | -2.427988 |  |
| 23166 | TCF7L2 protein, human | WDR4        | 0.000532 | -2.42595  |  |
| 23167 | TCF7L2 protein, human | GART        | 0.000434 | -2.418457 |  |
| 23168 | TCF7L2 protein, human | SLC38A10    | 0.000553 | -2.412111 |  |
| 23169 | TCF7L2 protein, human | CXXC5       | 0.000079 | -2.389303 |  |
| 23170 | TCF7L2 protein, human | EIF4B       | 0.000312 | -2.381829 |  |
| 23171 | TCF7L2 protein, human | ZFAND2B     | 0.000489 | -2.366606 |  |
| 23172 | TCF7L2 protein, human | AGPHD1      | 0.000091 | -2.36445  |  |
| 23173 | TCF7L2 protein, human | KIAA0141    | 0.000179 | -2.349644 |  |
| 23174 | TCF7L2 protein, human | RBCK1       | 0.000486 | -2.340571 |  |
| 23175 | TCF7L2 protein, human | ANKHD1-EIF4 | 0.000437 | -2.305972 |  |
| 23176 | TCF7L2 protein, human | ATP5G2      | 0.000259 | -2.290497 |  |
| 23177 | TCF7L2 protein, human | HSBP1L1     | 0.000067 | -2.281044 |  |
| 23178 | TCF7L2 protein, human | ARPC3       | 0.000612 | -2.271593 |  |
| 23179 | TCF7L2 protein, human | TPD52L1     | 0.000315 | -2.270668 |  |
| 23180 | TCF7L2 protein, human | FRAT2       | 0.000418 | -2.247018 |  |
| 23181 | TCF7L2 protein, human | ARL2        | 0.000607 | -2.246019 |  |
| 23182 | TCF7L2 protein, human | SCCPDH      | 0.000259 | -2.231617 |  |
| 23183 | TCF7L2 protein, human | TIMM8B      | 0.000254 | -2.230223 |  |
| 23184 | TCF7L2 protein, human | BIRC6       | 0.000564 | -2.20328  |  |
| 23185 | TCF7L2 protein, human | GBAS        | 0.000367 | -2.202874 |  |
| 23186 | TCF7L2 protein, human | C6orf108    | 0.000196 | -2.158936 |  |
| 23187 | TCF7L2 protein, human | CHST3       | 0.000407 | -2.132689 |  |
| 23188 | TCF7L2 protein, human | SLC39A4     | 0.000378 | -2.128275 |  |
| 23189 | TCF7L2 protein, human | MIPEP       | 0.00007  | -2.116788 |  |
| 23190 | TCF7L2 protein, human | PREPL       | 0.000058 | -2.095728 |  |
| 23191 | TCF7L2 protein, human | TAF1D       | 0.00007  | -2.095709 |  |
| 23192 | TCF7L2 protein, human | SLC17A9     | 0.000143 | -2.079349 |  |
| 23193 | TCF7L2 protein, human | EXOSC1      | 0.000259 | -2.075314 |  |
| 23194 | TCF7L2 protein, human | MAGED1      | 0.000376 | -2.073153 |  |
| 23195 | TCF7L2 protein, human | C1orf57     | 0.000615 | -2.042778 |  |
| 23196 | TCF7L2 protein, human | C2orf28     | 0.00052  | -2.041845 |  |
| 23197 | TCF7L2 protein, human | ZFP62       | 0.000058 | -2.032576 |  |
| 23198 | TCF7L2 protein, human | TMEM18      | 0.000257 | -2.026822 |  |

|       |                       |          |          |          |  |
|-------|-----------------------|----------|----------|----------|--|
| 23199 | TCF7L2 protein, human | HN1      | 0.000033 | 2.003492 |  |
| 23200 | TCF7L2 protein, human | MYST3    | 0.000605 | 2.012837 |  |
| 23201 | TCF7L2 protein, human | MBD4     | 0.000087 | 2.02786  |  |
| 23202 | TCF7L2 protein, human | C17orf85 | 0.000287 | 2.030274 |  |
| 23203 | TCF7L2 protein, human | SH3BGRL2 | 0.000259 | 2.031019 |  |
| 23204 | TCF7L2 protein, human | TMEM50A  | 0.000259 | 2.047113 |  |
| 23205 | TCF7L2 protein, human | GPR107   | 0.000266 | 2.051135 |  |
| 23206 | TCF7L2 protein, human | RB1      | 0.000078 | 2.05352  |  |
| 23207 | TCF7L2 protein, human | FAM122B  | 0.000129 | 2.05692  |  |
| 23208 | TCF7L2 protein, human | GGCX     | 0.000191 | 2.075676 |  |
| 23209 | TCF7L2 protein, human | MAPRE2   | 0.000392 | 2.088331 |  |
| 23210 | TCF7L2 protein, human | UPF3A    | 0.000487 | 2.116966 |  |
| 23211 | TCF7L2 protein, human | ARPC5L   | 0.000064 | 2.134362 |  |
| 23212 | TCF7L2 protein, human | PSMD5    | 0.000018 | 2.135035 |  |
| 23213 | TCF7L2 protein, human | YTHDC2   | 0.000096 | 2.176141 |  |
| 23214 | TCF7L2 protein, human | FRG1     | 0.000112 | 2.210131 |  |
| 23215 | TCF7L2 protein, human | VAPA     | 0.000437 | 2.236095 |  |
| 23216 | TCF7L2 protein, human | ROD1     | 0.000114 | 2.270856 |  |
| 23217 | TCF7L2 protein, human | FAM91A2  | 0.000614 | 2.287029 |  |
| 23218 | TCF7L2 protein, human | HIST1H1C | 0.000058 | 2.309695 |  |
| 23219 | TCF7L2 protein, human | GAPVD1   | 0.000259 | 2.351562 |  |
| 23220 | TCF7L2 protein, human | GPS2     | 0.000015 | 2.357439 |  |
| 23221 | TCF7L2 protein, human | DOLPP1   | 0.000064 | 2.403751 |  |
| 23222 | TCF7L2 protein, human | SUGT1    | 0.000413 | 2.430777 |  |
| 23223 | TCF7L2 protein, human | VAPB     | 0.000259 | 2.433886 |  |
| 23224 | TCF7L2 protein, human | ZC3H13   | 0.00008  | 2.449023 |  |
| 23225 | TCF7L2 protein, human | DSG2     | 0.000062 | 2.460754 |  |
| 23226 | TCF7L2 protein, human | UBE3C    | 0.000058 | 2.522976 |  |
| 23227 | TCF7L2 protein, human | HOXA13   | 0.000143 | 2.550304 |  |
| 23228 | TCF7L2 protein, human | ZNF271   | 0.000626 | 2.562873 |  |
| 23229 | TCF7L2 protein, human | ZCCHC2   | 0.000382 | 2.590748 |  |
| 23230 | TCF7L2 protein, human | TM9SF3   | 0.000143 | 2.59314  |  |
| 23231 | TCF7L2 protein, human | SGCB     | 0.000015 | 2.689522 |  |
| 23232 | TCF7L2 protein, human | MRPL35   | 0.000564 | 2.712121 |  |
| 23233 | TCF7L2 protein, human | SLC16A1  | 0.000175 | 2.715163 |  |
| 23234 | TCF7L2 protein, human | NBN      | 0.000065 | 2.803623 |  |
| 23235 | TCF7L2 protein, human | HOXB7    | 0.000109 | 2.850091 |  |
| 23236 | TCF7L2 protein, human | PRRG4    | 0.000001 | 2.878893 |  |
| 23237 | TCF7L2 protein, human | SEPW1    | 0.000014 | 2.899693 |  |
| 23238 | TCF7L2 protein, human | ASH1L    | 0.000058 | 2.991166 |  |
| 23239 | TCF7L2 protein, human | ALDH3A1  | 0.00048  | 3.025803 |  |
| 23240 | TCF7L2 protein, human | MSN      | 0.000121 | 3.047942 |  |
| 23241 | TCF7L2 protein, human | PIGN     | 0.000049 | 3.062276 |  |
| 23242 | TCF7L2 protein, human | DNAJB6   | 0.00007  | 3.07301  |  |
| 23243 | TCF7L2 protein, human | ARGLU1   | 0.000279 | 3.146774 |  |
| 23244 | TCF7L2 protein, human | TTC39C   | 0.00052  | 3.154439 |  |
| 23245 | TCF7L2 protein, human | ING2     | 0.000177 | 3.185976 |  |
| 23246 | TCF7L2 protein, human | MECOM    | 0.000112 | 3.198311 |  |
| 23247 | TCF7L2 protein, human | DSC2     | 0.000018 | 3.231242 |  |
| 23248 | TCF7L2 protein, human | TXNDC9   | 0.000143 | 3.328385 |  |

|       |                       |              |          |           |  |
|-------|-----------------------|--------------|----------|-----------|--|
| 23249 | TCF7L2 protein, human | PIK3C3       | 0.000003 | 3.343665  |  |
| 23250 | TCF7L2 protein, human | ATXN1        | 0.000166 | 3.387009  |  |
| 23251 | TCF7L2 protein, human | TNRC18       | 0.000082 | 3.412363  |  |
| 23252 | TCF7L2 protein, human | RHOA         | 0.000078 | 3.614124  |  |
| 23253 | TCF7L2 protein, human | ESYT2        | 0.000458 | 3.665878  |  |
| 23254 | TCF7L2 protein, human | INO80C       | 0.000135 | 3.731187  |  |
| 23255 | TCF7L2 protein, human | TUG1         | 0.000015 | 3.752775  |  |
| 23256 | TCF7L2 protein, human | RTTN         | 0.000002 | 3.816143  |  |
| 23257 | TCF7L2 protein, human | GEM          | 0.000143 | 3.9926    |  |
| 23258 | TCF7L2 protein, human | TPRXL        | 0.00018  | 4.054795  |  |
| 23259 | TCF7L2 protein, human | LOC100505875 | 0.000492 | 4.152001  |  |
| 23260 | TCF7L2 protein, human | FAM50B       | 0.000018 | 4.335119  |  |
| 23261 | TCF7L2 protein, human | PTGR1        | 0.000001 | 4.486203  |  |
| 23262 | TCF7L2 protein, human | UGT1A6       | 0.000406 | 4.496336  |  |
| 23263 | TCF7L2 protein, human | SYNJ2        | 0.000382 | 4.635881  |  |
| 23264 | TCF7L2 protein, human | LIMCH1       | 0.000303 | 4.710667  |  |
| 23265 | TCF7L2 protein, human | ZNF558       | 0.000114 | 5.356884  |  |
| 23266 | TCF7L2 protein, human | ZNF426       | 0.000112 | 5.90991   |  |
| 23267 | TCF7L2 protein, human | SH3TC2       | 0.000208 | 6.079137  |  |
| 23268 | TCF7L2 protein, human | SPIN3        | 0.000147 | 7.489164  |  |
| 23269 | TCF7L2 protein, human | ZNF204P      | 0.000614 | 8.492386  |  |
| 23270 | TCF7L2 protein, human | BAT3         | 0.000087 | 9.181054  |  |
| 23271 | TCF7L2 protein, human | PRUNE2       | 0.000015 | 9.361624  |  |
| 23272 | TCF7L2 protein, human | RASA1        | 0.00018  | 9.621369  |  |
| 23273 | TCF7L2 protein, human | MT1M         | 0.000016 | 11.080972 |  |
| 23274 | TCF7L2 protein, human | FAM129A      | 0.000243 | 14.358025 |  |
| 23275 | TCF7L2 protein, human | SERPINB5     | 0.00007  | 14.794114 |  |
| 23276 | TCF7L2 protein, human | AKAP12       | 0.000382 | 19.882979 |  |
| 23277 | TCF7L2 protein, human | REG1A        | 0.000149 | 36.576833 |  |
| 23278 | Test Result           | WHAMML1      | 0.000001 | -6.860537 |  |
| 23279 | Test Result           | CPA3         | 0.000003 | -5.044826 |  |
| 23280 | Test Result           | ATP7B        | 0.011554 | -4.888935 |  |
| 23281 | Test Result           | SNX4         | 0.000002 | -4.667777 |  |
| 23282 | Test Result           | PLA2G4A      | 0.00577  | -4.500787 |  |
| 23283 | Test Result           | DNAJB9       | 0.000189 | -4.290727 |  |
| 23284 | Test Result           | AZGP1        | 0.001881 | -3.990623 |  |
| 23285 | Test Result           | STK3         | 0.001294 | -3.983015 |  |
| 23286 | Test Result           | ANXA2P1      | 0.000976 | -3.91317  |  |
| 23287 | Test Result           | SERPINB5     | 0.029945 | -3.882397 |  |
| 23288 | Test Result           | UBE2M        | 0.005112 | -3.464159 |  |
| 23289 | Test Result           | SLC5A1       | 0.001881 | -3.343978 |  |
| 23290 | Test Result           | C1orf77      | 0.019141 | -3.249476 |  |
| 23291 | Test Result           | ITGAL        | 0.002207 | -3.226547 |  |
| 23292 | Test Result           | PHF20        | 0.004249 | -3.173091 |  |
| 23293 | Test Result           | DHFR         | 0.000227 | -3.161007 |  |
| 23294 | Test Result           | UBE2G1       | 0.00108  | -3.159966 |  |
| 23295 | Test Result           | PION         | 0.001009 | -3.092732 |  |
| 23296 | Test Result           | SKIL         | 0.001289 | -3.07535  |  |
| 23297 | Test Result           | HLA-DQB1     | 0.002207 | -3.056883 |  |
| 23298 | Test Result           | PPFIA1       | 0.000339 | -3.01347  |  |

|       |                            |           |          |           |  |
|-------|----------------------------|-----------|----------|-----------|--|
| 23299 | Test Result                | BIRC2     | 0.000189 | -3.001755 |  |
| 23300 | Test Result                | PTGER4    | 0.000705 | -2.983232 |  |
| 23301 | Test Result                | SLC35A2   | 0.000279 | -2.890172 |  |
| 23302 | Test Result                | GORASP1   | 0.000436 | -2.758516 |  |
| 23303 | Test Result                | NTS       | 0.027001 | -2.714367 |  |
| 23304 | Test Result                | TGFB1     | 0.00009  | -2.677548 |  |
| 23305 | Test Result                | NEK1      | 0.029945 | -2.676128 |  |
| 23306 | Test Result                | CNR1      | 0.009133 | -2.600063 |  |
| 23307 | Test Result                | AIF1      | 0.002207 | -2.587546 |  |
| 23308 | Test Result                | ZNF7      | 0.001881 | -2.585058 |  |
| 23309 | Test Result                | CEP57     | 0.004489 | -2.551301 |  |
| 23310 | Test Result                | PTPRO     | 0.029339 | -2.544664 |  |
| 23311 | Test Result                | MTUS2     | 0.009965 | -2.539415 |  |
| 23312 | Test Result                | PRRX1     | 0.009965 | -2.516925 |  |
| 23313 | Test Result                | ATP2C1    | 0.025707 | -2.462486 |  |
| 23314 | Test Result                | LYST      | 0.004489 | -2.419571 |  |
| 23315 | Test Result                | RER1      | 0.019141 | -2.318795 |  |
| 23316 | Test Result                | UCHL3     | 0.029945 | -2.25664  |  |
| 23317 | Test Result                | ICAM1     | 0.029339 | -2.238621 |  |
| 23318 | Test Result                | CAPN3     | 0.000339 | -2.235597 |  |
| 23319 | Test Result                | CDH3      | 0.019141 | -2.234701 |  |
| 23320 | Test Result                | SPI1      | 0.019141 | -2.21907  |  |
| 23321 | Test Result                | HDAC4     | 0.027182 | -2.21749  |  |
| 23322 | Test Result                | IFITM3    | 0.029433 | -2.212471 |  |
| 23323 | Test Result                | APC       | 0.025707 | -2.180582 |  |
| 23324 | Test Result                | PTK2B     | 0.000773 | -2.167113 |  |
| 23325 | Test Result                | ZBTB33    | 0.00212  | -2.133658 |  |
| 23326 | Test Result                | MANBA     | 0.029433 | -2.13317  |  |
| 23327 | Test Result                | DPY19L2P2 | 0.027045 | -2.124387 |  |
| 23328 | Test Result                | SBNO2     | 0.029945 | -2.10854  |  |
| 23329 | Test Result                | PACRG     | 0.000302 | -2.099506 |  |
| 23330 | Test Result                | CADM3     | 0.000527 | -2.075309 |  |
| 23331 | Test Result                | EFHA1     | 0.009963 | -2.070418 |  |
| 23332 | Test Result                | CYB5R1    | 0.021608 | -2.043114 |  |
| 23333 | Test Result                | PAX2      | 0.025707 | -2.027201 |  |
| 23334 | Test Result                | TM9SF2    | 0.004249 | -2.026946 |  |
| 23335 | Test Result                | PTPN18    | 0.004489 | -2.003421 |  |
| 23336 | Test Result                | CYP2A13   | 0.017501 | 2.262004  |  |
| 23337 | Test Result                | ZNF197    | 0.027955 | 2.435839  |  |
| 23338 | Thyroid carcinoma          | TPST2     | 0.000258 | 2.332694  |  |
| 23339 | Tongue Carcinoma           | TOR1AIP2  | 0        | 3.057763  |  |
| 23340 | Tumor Necrosis Factor-Beta | SOD2      | 0        | -8.112067 |  |
| 23341 | Tumor Necrosis Factor-Beta | S100A8    | 0        | -7.784066 |  |
| 23342 | Tumor Necrosis Factor-Beta | RCHY1     | 0.000002 | -6.905795 |  |
| 23343 | Tumor Necrosis Factor-Beta | FN1       | 0        | -6.761156 |  |
| 23344 | Tumor Necrosis Factor-Beta | SLC2A3    | 0        | -6.570534 |  |
| 23345 | Tumor Necrosis Factor-Beta | NR1I2     | 0.000001 | -6.339547 |  |
| 23346 | Tumor Necrosis Factor-Beta | FCGR2A    | 0.000001 | -6.291089 |  |
| 23347 | Tumor Necrosis Factor-Beta | RAB31     | 0        | -5.912531 |  |
| 23348 | Tumor Necrosis Factor-Beta | C15orf24  | 0        | -5.535157 |  |

|       |                            |          |          |           |  |
|-------|----------------------------|----------|----------|-----------|--|
| 23349 | Tumor Necrosis Factor-Beta | GLCE     | 0.000002 | -5.524381 |  |
| 23350 | Tumor Necrosis Factor-Beta | NGRN     | 0        | -5.471482 |  |
| 23351 | Tumor Necrosis Factor-Beta | CD55     | 0        | -5.459106 |  |
| 23352 | Tumor Necrosis Factor-Beta | BHLHE40  | 0.000001 | -5.315644 |  |
| 23353 | Tumor Necrosis Factor-Beta | BBS4     | 0        | -5.239002 |  |
| 23354 | Tumor Necrosis Factor-Beta | ETFA     | 0        | -5.17691  |  |
| 23355 | Tumor Necrosis Factor-Beta | PPARG    | 0        | -5.111144 |  |
| 23356 | Tumor Necrosis Factor-Beta | KLF6     | 0.000002 | -5.014973 |  |
| 23357 | Tumor Necrosis Factor-Beta | EZR      | 0.000001 | -5.013787 |  |
| 23358 | Tumor Necrosis Factor-Beta | SERPINF1 | 0        | -4.967764 |  |
| 23359 | Tumor Necrosis Factor-Beta | THBD     | 0.000001 | -4.944449 |  |
| 23360 | Tumor Necrosis Factor-Beta | IER3     | 0        | -4.785686 |  |
| 23361 | Tumor Necrosis Factor-Beta | MGA      | 0        | -4.782386 |  |
| 23362 | Tumor Necrosis Factor-Beta | NPC2     | 0        | -4.761235 |  |
| 23363 | Tumor Necrosis Factor-Beta | ACAA2    | 0.000001 | -4.675696 |  |
| 23364 | Tumor Necrosis Factor-Beta | SNRPN    | 0        | -4.645634 |  |
| 23365 | Tumor Necrosis Factor-Beta | ARID5B   | 0        | -4.638497 |  |
| 23366 | Tumor Necrosis Factor-Beta | PPP3CA   | 0.000002 | -4.59796  |  |
| 23367 | Tumor Necrosis Factor-Beta | SEL1L    | 0        | -4.588009 |  |
| 23368 | Tumor Necrosis Factor-Beta | CTGF     | 0        | -4.584219 |  |
| 23369 | Tumor Necrosis Factor-Beta | PCTP     | 0        | -4.507978 |  |
| 23370 | Tumor Necrosis Factor-Beta | TMEM66   | 0        | -4.483211 |  |
| 23371 | Tumor Necrosis Factor-Beta | CASP6    | 0        | -4.423836 |  |
| 23372 | Tumor Necrosis Factor-Beta | FSTL1    | 0        | -4.387206 |  |
| 23373 | Tumor Necrosis Factor-Beta | MTUS1    | 0        | -4.365914 |  |
| 23374 | Tumor Necrosis Factor-Beta | THUMPD1  | 0        | -4.359705 |  |
| 23375 | Tumor Necrosis Factor-Beta | SLC2A14  | 0        | -4.338697 |  |
| 23376 | Tumor Necrosis Factor-Beta | TMEM87A  | 0        | -4.323575 |  |
| 23377 | Tumor Necrosis Factor-Beta | SNAP23   | 0        | -4.318045 |  |
| 23378 | Tumor Necrosis Factor-Beta | DNAJA2   | 0        | -4.224361 |  |
| 23379 | Tumor Necrosis Factor-Beta | MECOM    | 0.000001 | -4.209247 |  |
| 23380 | Tumor Necrosis Factor-Beta | KIAA0247 | 0        | -4.184222 |  |
| 23381 | Tumor Necrosis Factor-Beta | SPARC    | 0.000001 | -4.17627  |  |
| 23382 | Tumor Necrosis Factor-Beta | PEX2     | 0.000001 | -4.172725 |  |
| 23383 | Tumor Necrosis Factor-Beta | KIAA0430 | 0        | -4.136647 |  |
| 23384 | Tumor Necrosis Factor-Beta | USO1     | 0.000003 | -4.129096 |  |
| 23385 | Tumor Necrosis Factor-Beta | IGFBP7   | 0.000003 | -4.081525 |  |
| 23386 | Tumor Necrosis Factor-Beta | MAPKSP1  | 0.000003 | -4.053762 |  |
| 23387 | Tumor Necrosis Factor-Beta | RRN3     | 0.000001 | -4.031623 |  |
| 23388 | Tumor Necrosis Factor-Beta | BCL6     | 0.000002 | -3.985867 |  |
| 23389 | Tumor Necrosis Factor-Beta | BACH1    | 0.000002 | -3.980111 |  |
| 23390 | Tumor Necrosis Factor-Beta | THG1L    | 0        | -3.971637 |  |
| 23391 | Tumor Necrosis Factor-Beta | COPS4    | 0        | -3.969351 |  |
| 23392 | Tumor Necrosis Factor-Beta | VIM      | 0        | -3.920609 |  |
| 23393 | Tumor Necrosis Factor-Beta | NEK1     | 0.000001 | -3.919012 |  |
| 23394 | Tumor Necrosis Factor-Beta | GJA1     | 0        | -3.894751 |  |
| 23395 | Tumor Necrosis Factor-Beta | SAMM50   | 0        | -3.863954 |  |
| 23396 | Tumor Necrosis Factor-Beta | KDEL3    | 0        | -3.804807 |  |
| 23397 | Tumor Necrosis Factor-Beta | ERBB2IP  | 0.000001 | -3.783421 |  |
| 23398 | Tumor Necrosis Factor-Beta | FBN1     | 0        | -3.781672 |  |

|       |                            |          |          |           |  |
|-------|----------------------------|----------|----------|-----------|--|
| 23399 | Tumor Necrosis Factor-Beta | EID1     | 0.000001 | -3.773214 |  |
| 23400 | Tumor Necrosis Factor-Beta | HERPUD1  | 0        | -3.772011 |  |
| 23401 | Tumor Necrosis Factor-Beta | TANK     | 0.000002 | -3.75804  |  |
| 23402 | Tumor Necrosis Factor-Beta | COX4I1   | 0.000001 | -3.731766 |  |
| 23403 | Tumor Necrosis Factor-Beta | DEXI     | 0.000001 | -3.723568 |  |
| 23404 | Tumor Necrosis Factor-Beta | RPS15A   | 0        | -3.693139 |  |
| 23405 | Tumor Necrosis Factor-Beta | PSMB6    | 0.000001 | -3.682886 |  |
| 23406 | Tumor Necrosis Factor-Beta | PCM1     | 0        | -3.680223 |  |
| 23407 | Tumor Necrosis Factor-Beta | HNMT     | 0        | -3.654111 |  |
| 23408 | Tumor Necrosis Factor-Beta | COL3A1   | 0        | -3.631809 |  |
| 23409 | Tumor Necrosis Factor-Beta | WDFY3    | 0        | -3.613076 |  |
| 23410 | Tumor Necrosis Factor-Beta | YIPF5    | 0        | -3.593571 |  |
| 23411 | Tumor Necrosis Factor-Beta | KIAA0355 | 0        | -3.578624 |  |
| 23412 | Tumor Necrosis Factor-Beta | CCNI     | 0        | -3.564784 |  |
| 23413 | Tumor Necrosis Factor-Beta | SEC31A   | 0.000003 | -3.529623 |  |
| 23414 | Tumor Necrosis Factor-Beta | PXDN     | 0        | -3.493294 |  |
| 23415 | Tumor Necrosis Factor-Beta | IGLC7    | 0        | -3.468113 |  |
| 23416 | Tumor Necrosis Factor-Beta | DDC      | 0        | -3.464472 |  |
| 23417 | Tumor Necrosis Factor-Beta | KLHL24   | 0.000002 | -3.378042 |  |
| 23418 | Tumor Necrosis Factor-Beta | NOP16    | 0        | -3.358879 |  |
| 23419 | Tumor Necrosis Factor-Beta | JAG1     | 0        | -3.356608 |  |
| 23420 | Tumor Necrosis Factor-Beta | 10-Sep   | 0.000001 | -3.328721 |  |
| 23421 | Tumor Necrosis Factor-Beta | CLASP2   | 0        | -3.308735 |  |
| 23422 | Tumor Necrosis Factor-Beta | CFTR     | 0        | -3.299949 |  |
| 23423 | Tumor Necrosis Factor-Beta | TTC19    | 0.000001 | -3.272009 |  |
| 23424 | Tumor Necrosis Factor-Beta | NHP2L1   | 0.000001 | -3.259085 |  |
| 23425 | Tumor Necrosis Factor-Beta | ARIH1    | 0.000001 | -3.243082 |  |
| 23426 | Tumor Necrosis Factor-Beta | RAD17    | 0        | -3.223498 |  |
| 23427 | Tumor Necrosis Factor-Beta | FEM1B    | 0        | -3.213209 |  |
| 23428 | Tumor Necrosis Factor-Beta | RPL17    | 0        | -3.210999 |  |
| 23429 | Tumor Necrosis Factor-Beta | C5AR1    | 0.000002 | -3.177691 |  |
| 23430 | Tumor Necrosis Factor-Beta | COPS3    | 0.000001 | -3.168768 |  |
| 23431 | Tumor Necrosis Factor-Beta | ADAM10   | 0        | -3.162575 |  |
| 23432 | Tumor Necrosis Factor-Beta | EMP2     | 0        | -3.148701 |  |
| 23433 | Tumor Necrosis Factor-Beta | NFIB     | 0        | -3.141033 |  |
| 23434 | Tumor Necrosis Factor-Beta | NNMT     | 0        | -3.084436 |  |
| 23435 | Tumor Necrosis Factor-Beta | BFAR     | 0        | -3.077174 |  |
| 23436 | Tumor Necrosis Factor-Beta | BRD1     | 0        | -3.064709 |  |
| 23437 | Tumor Necrosis Factor-Beta | CHMP1B   | 0.000001 | -3.056347 |  |
| 23438 | Tumor Necrosis Factor-Beta | SKP1     | 0        | -3.030561 |  |
| 23439 | Tumor Necrosis Factor-Beta | LSM6     | 0.000002 | -3.022696 |  |
| 23440 | Tumor Necrosis Factor-Beta | PNP      | 0.000002 | -3.005123 |  |
| 23441 | Tumor Necrosis Factor-Beta | HEG1     | 0.000002 | -3.004856 |  |
| 23442 | Tumor Necrosis Factor-Beta | DHRS7    | 0.000001 | -2.991803 |  |
| 23443 | Tumor Necrosis Factor-Beta | CRTC3    | 0        | -2.9627   |  |
| 23444 | Tumor Necrosis Factor-Beta | DCTN6    | 0        | -2.959168 |  |
| 23445 | Tumor Necrosis Factor-Beta | ITFG1    | 0.000002 | -2.952976 |  |
| 23446 | Tumor Necrosis Factor-Beta | PDHB     | 0        | -2.920123 |  |
| 23447 | Tumor Necrosis Factor-Beta | TSPAN12  | 0.000001 | -2.901965 |  |
| 23448 | Tumor Necrosis Factor-Beta | CD9      | 0.000002 | -2.889606 |  |



|       |                            |              |          |           |  |
|-------|----------------------------|--------------|----------|-----------|--|
| 23449 | Tumor Necrosis Factor-Beta | KIF13B       | 0.000001 | -2.886321 |  |
| 23450 | Tumor Necrosis Factor-Beta | IFNGR1       | 0        | -2.885487 |  |
| 23451 | Tumor Necrosis Factor-Beta | WDR61        | 0        | -2.879669 |  |
| 23452 | Tumor Necrosis Factor-Beta | CAPZA2       | 0.000002 | -2.851265 |  |
| 23453 | Tumor Necrosis Factor-Beta | USP7         | 0.000001 | -2.836964 |  |
| 23454 | Tumor Necrosis Factor-Beta | CBY1         | 0.000001 | -2.818675 |  |
| 23455 | Tumor Necrosis Factor-Beta | CFDP1        | 0        | -2.815822 |  |
| 23456 | Tumor Necrosis Factor-Beta | TSPYL1       | 0.000001 | -2.786069 |  |
| 23457 | Tumor Necrosis Factor-Beta | TMEM184C     | 0.000002 | -2.783419 |  |
| 23458 | Tumor Necrosis Factor-Beta | AKAP13       | 0        | -2.77845  |  |
| 23459 | Tumor Necrosis Factor-Beta | ACSL1        | 0.000001 | -2.776639 |  |
| 23460 | Tumor Necrosis Factor-Beta | HSBP1        | 0        | -2.755915 |  |
| 23461 | Tumor Necrosis Factor-Beta | PITPNB       | 0.000001 | -2.744486 |  |
| 23462 | Tumor Necrosis Factor-Beta | TM2D3        | 0.000002 | -2.737388 |  |
| 23463 | Tumor Necrosis Factor-Beta | GPC3         | 0        | -2.735538 |  |
| 23464 | Tumor Necrosis Factor-Beta | C4orf27      | 0        | -2.722139 |  |
| 23465 | Tumor Necrosis Factor-Beta | DYNLT1       | 0        | -2.719459 |  |
| 23466 | Tumor Necrosis Factor-Beta | LOC100505503 | 0        | -2.689223 |  |
| 23467 | Tumor Necrosis Factor-Beta | SCAMP1       | 0.000001 | -2.653625 |  |
| 23468 | Tumor Necrosis Factor-Beta | NCOA2        | 0        | -2.64238  |  |
| 23469 | Tumor Necrosis Factor-Beta | FKBP3        | 0        | -2.642153 |  |
| 23470 | Tumor Necrosis Factor-Beta | ADH5         | 0        | -2.63693  |  |
| 23471 | Tumor Necrosis Factor-Beta | CCDC28A      | 0.000001 | -2.588423 |  |
| 23472 | Tumor Necrosis Factor-Beta | BNIP2        | 0        | -2.570422 |  |
| 23473 | Tumor Necrosis Factor-Beta | NET1         | 0.000001 | -2.524456 |  |
| 23474 | Tumor Necrosis Factor-Beta | KRAS         | 0        | -2.524198 |  |
| 23475 | Tumor Necrosis Factor-Beta | EPS8         | 0.000003 | -2.510814 |  |
| 23476 | Tumor Necrosis Factor-Beta | HMGCR        | 0        | -2.504898 |  |
| 23477 | Tumor Necrosis Factor-Beta | PARN         | 0        | -2.486416 |  |
| 23478 | Tumor Necrosis Factor-Beta | P4HA2        | 0.000001 | -2.454161 |  |
| 23479 | Tumor Necrosis Factor-Beta | CNOT8        | 0.000002 | -2.427209 |  |
| 23480 | Tumor Necrosis Factor-Beta | TAPBP        | 0        | -2.414875 |  |
| 23481 | Tumor Necrosis Factor-Beta | PAFAH1B1     | 0.000003 | -2.405888 |  |
| 23482 | Tumor Necrosis Factor-Beta | ATP10B       | 0.000002 | -2.377451 |  |
| 23483 | Tumor Necrosis Factor-Beta | PREPL        | 0.000001 | -2.37571  |  |
| 23484 | Tumor Necrosis Factor-Beta | BTBD1        | 0        | -2.369424 |  |
| 23485 | Tumor Necrosis Factor-Beta | NEK9         | 0.000003 | -2.346205 |  |
| 23486 | Tumor Necrosis Factor-Beta | NUDT9        | 0.000001 | -2.341673 |  |
| 23487 | Tumor Necrosis Factor-Beta | DUT          | 0.000001 | -2.339239 |  |
| 23488 | Tumor Necrosis Factor-Beta | IQGAP1       | 0        | -2.287108 |  |
| 23489 | Tumor Necrosis Factor-Beta | NSA2         | 0.000001 | -2.277827 |  |
| 23490 | Tumor Necrosis Factor-Beta | SPTBN1       | 0        | -2.266274 |  |
| 23491 | Tumor Necrosis Factor-Beta | NGLY1        | 0.000003 | -2.221813 |  |
| 23492 | Tumor Necrosis Factor-Beta | EXOC1        | 0.000002 | -2.187854 |  |
| 23493 | Tumor Necrosis Factor-Beta | C4orf46      | 0        | -2.158543 |  |
| 23494 | Tumor Necrosis Factor-Beta | RPS17        | 0.000001 | -2.153819 |  |
| 23495 | Tumor Necrosis Factor-Beta | ST13         | 0        | -2.133898 |  |
| 23496 | Tumor Necrosis Factor-Beta | RPL10A       | 0        | -2.119268 |  |
| 23497 | Tumor Necrosis Factor-Beta | TSPAN8       | 0.000002 | -2.115194 |  |
| 23498 | Tumor Necrosis Factor-Beta | SEC11A       | 0        | -2.109864 |  |

|       |                            |              |          |           |  |
|-------|----------------------------|--------------|----------|-----------|--|
| 23499 | Tumor Necrosis Factor-Beta | DCAF6        | 0.000003 | -2.083197 |  |
| 23500 | Tumor Necrosis Factor-Beta | ASAH1        | 0        | -2.060228 |  |
| 23501 | Tumor Necrosis Factor-Beta | RER1         | 0        | 2.071819  |  |
| 23502 | Tumor Necrosis Factor-Beta | H2AFX        | 0.000002 | 2.148138  |  |
| 23503 | Tumor Necrosis Factor-Beta | HLA-A        | 0        | 2.15835   |  |
| 23504 | Tumor Necrosis Factor-Beta | TP73         | 0        | 2.244648  |  |
| 23505 | Vomiting                   | IGF2         | 0.007315 | -7.056791 |  |
| 23506 | Vomiting                   | HLA-DRB4     | 0.006519 | -4.148371 |  |
| 23507 | Vomiting                   | CXCL11       | 0.000089 | -3.227446 |  |
| 23508 | Vomiting                   | CXCL5        | 0.000891 | -3.025244 |  |
| 23509 | Vomiting                   | CASQ2        | 0.002929 | -2.96268  |  |
| 23510 | Vomiting                   | IL11         | 0.025439 | -2.222248 |  |
| 23511 | Vomiting                   | JAM3         | 0.012073 | -2.194845 |  |
| 23512 | Vomiting                   | LOC100287689 | 0.0074   | -2.170705 |  |
| 23513 | Vomiting                   | EHD2         | 0.007315 | -2.143731 |  |
| 23514 | Vomiting                   | UCA1         | 0.027932 | -2.137298 |  |
| 23515 | Vomiting                   | CXCL1        | 0.007315 | -2.044647 |  |
| 23516 | Vomiting                   | FAM19A1      | 0.043807 | -2.002023 |  |
| 23517 | White color finding        | ARSE         | 0.046405 | 2.34408   |  |
